# Supplementary material for: 2-Bromoanthraquinone as a highly efficient photocatalyst for the oxidation of sec-aromatic alcohols: experimental and DFT study
Source: Royal Society of Chemistry journal article supplement (doi:10.1039/d0ra06414a), 2020-01-01
Supplement: d0ra06414a1.out [file d0ra06414a1.out]

 Entering Link 1 = E:\Gaussian\G09W\l1.exe PID=    119300.
  
 Copyright (c) 1988,1990,1992,1993,1995,1998,2003,2009,2013,
            Gaussian, Inc.  All Rights Reserved.
  
 This is part of the Gaussian(R) 09 program.  It is based on
 the Gaussian(R) 03 system (copyright 2003, Gaussian, Inc.),
 the Gaussian(R) 98 system (copyright 1998, Gaussian, Inc.),
 the Gaussian(R) 94 system (copyright 1995, Gaussian, Inc.),
 the Gaussian 92(TM) system (copyright 1992, Gaussian, Inc.),
 the Gaussian 90(TM) system (copyright 1990, Gaussian, Inc.),
 the Gaussian 88(TM) system (copyright 1988, Gaussian, Inc.),
 the Gaussian 86(TM) system (copyright 1986, Carnegie Mellon
 University), and the Gaussian 82(TM) system (copyright 1983,
 Carnegie Mellon University). Gaussian is a federally registered
 trademark of Gaussian, Inc.
  
 This software contains proprietary and confidential information,
 including trade secrets, belonging to Gaussian, Inc.
  
 This software is provided under written license and may be
 used, copied, transmitted, or stored only in accord with that
 written license.
  
 The following legend is applicable only to US Government
 contracts under FAR:
  
                    RESTRICTED RIGHTS LEGEND
  
 Use, reproduction and disclosure by the US Government is
 subject to restrictions as set forth in subparagraphs (a)
 and (c) of the Commercial Computer Software - Restricted
 Rights clause in FAR 52.227-19.
  
 Gaussian, Inc.
 340 Quinnipiac St., Bldg. 40, Wallingford CT 06492
  
  
 ---------------------------------------------------------------
 Warning -- This program may not be used in any manner that
 competes with the business of Gaussian, Inc. or will provide
 assistance to any competitor of Gaussian, Inc.  The licensee
 of this program is prohibited from giving any competitor of
 Gaussian, Inc. access to this program.  By using this program,
 the user acknowledges that Gaussian, Inc. is engaged in the
 business of creating and licensing software in the field of
 computational chemistry and represents and warrants to the
 licensee that it is not a competitor of Gaussian, Inc. and that
 it will not use this program in any manner prohibited above.
 ---------------------------------------------------------------
  

 Cite this work as:
 Gaussian 09, Revision D.01,
 M. J. Frisch, G. W. Trucks, H. B. Schlegel, G. E. Scuseria, 
 M. A. Robb, J. R. Cheeseman, G. Scalmani, V. Barone, B. Mennucci, 
 G. A. Petersson, H. Nakatsuji, M. Caricato, X. Li, H. P. Hratchian, 
 A. F. Izmaylov, J. Bloino, G. Zheng, J. L. Sonnenberg, M. Hada, 
 M. Ehara, K. Toyota, R. Fukuda, J. Hasegawa, M. Ishida, T. Nakajima, 
 Y. Honda, O. Kitao, H. Nakai, T. Vreven, J. A. Montgomery, Jr., 
 J. E. Peralta, F. Ogliaro, M. Bearpark, J. J. Heyd, E. Brothers, 
 K. N. Kudin, V. N. Staroverov, T. Keith, R. Kobayashi, J. Normand, 
 K. Raghavachari, A. Rendell, J. C. Burant, S. S. Iyengar, J. Tomasi, 
 M. Cossi, N. Rega, J. M. Millam, M. Klene, J. E. Knox, J. B. Cross, 
 V. Bakken, C. Adamo, J. Jaramillo, R. Gomperts, R. E. Stratmann, 
 O. Yazyev, A. J. Austin, R. Cammi, C. Pomelli, J. W. Ochterski, 
 R. L. Martin, K. Morokuma, V. G. Zakrzewski, G. A. Voth, 
 P. Salvador, J. J. Dannenberg, S. Dapprich, A. D. Daniels, 
 O. Farkas, J. B. Foresman, J. V. Ortiz, J. Cioslowski, 
 and D. J. Fox, Gaussian, Inc., Wallingford CT, 2013.
 
 ******************************************
 Gaussian 09:  IA32W-G09RevD.01 24-Apr-2013
                11-Jan-2020 
 ******************************************
 %nprocshared=2
 Will use up to    2 processors via shared memory.
 %mem=1GB
 %chk=E:\Gaussian file\2-BrAQ excited state.chk
 ----------------------------------------------------------------------
 #p td=(50-50,nstates=6) b3lyp/6-311+g(d) scrf=(solvent=acetonitrile) g
 uess=save geom=connectivity empiricaldispersion=gd3bj
 ----------------------------------------------------------------------
 1/38=1,57=2/1;
 2/12=2,17=6,18=5,40=1/2;
 3/5=4,6=6,7=11,11=9,16=1,25=1,30=1,70=2201,72=2,74=-5,124=41/1,2,8,3;
 4//1;
 5/5=2,38=5,53=2/2;
 8/6=1,10=2,108=6/1;
 9/41=6,42=1,48=2,70=2/14;
 6/7=2,8=2,9=2,10=2/1;
 99/5=1,9=1/99;
 Leave Link    1 at Sat Jan 11 17:39:54 2020, MaxMem=   134217728 cpu:         0.0
 (Enter E:\Gaussian\G09W\l101.exe)
 --------------------
 2-BrAQ excited state
 --------------------
 Symbolic Z-matrix:
 Charge =  0 Multiplicity = 1
 C                    -5.08809   0.0547    0.00001 
 C                    -4.05282   0.98285  -0.00003 
 C                    -2.72277   0.55548  -0.00014 
 C                    -2.43487  -0.82241  -0.00017 
 C                    -3.48187  -1.7477   -0.00015 
 C                    -4.80223  -1.31261  -0.00007 
 H                    -6.11767   0.39379   0.00008 
 H                    -4.26079   2.04538   0. 
 H                    -3.24667  -2.80454  -0.00019 
 H                    -5.60959  -2.03587  -0.00004 
 C                    -1.03444  -1.31693  -0.00015 
 O                    -0.77722  -2.5128   -0.00041 
 C                    -1.63685   1.57065  -0.00029 
 C                     0.05364  -0.29801  -0.00012 
 C                    -0.23461   1.07698  -0.00009 
 C                     1.37913  -0.73599  -0.00005 
 C                     0.81497   1.99927   0.00007 
 C                     2.4022    0.20135   0.00008 
 H                     1.58607  -1.79761  -0.00008 
 C                     2.13585   1.57122   0.00015 
 H                     0.58616   3.05741   0.00009 
 H                     2.94596   2.28915   0.00026 
 Br                    4.2179   -0.39642   0.00019 
 O                    -1.88442   2.76951   0.00027 
 
 NAtoms=     24 NQM=       24 NQMF=       0 NMMI=      0 NMMIF=      0
                NMic=       0 NMicF=      0.
                    Isotopes and Nuclear Properties:
 (Nuclear quadrupole moments (NQMom) in fm**2, nuclear magnetic moments (NMagM)
  in nuclear magnetons)

  Atom         1           2           3           4           5           6           7           8           9          10
 IAtWgt=          12          12          12          12          12          12           1           1           1           1
 AtmWgt=  12.0000000  12.0000000  12.0000000  12.0000000  12.0000000  12.0000000   1.0078250   1.0078250   1.0078250   1.0078250
 NucSpn=           0           0           0           0           0           0           1           1           1           1
 AtZEff=   0.0000000   0.0000000   0.0000000   0.0000000   0.0000000   0.0000000   0.0000000   0.0000000   0.0000000   0.0000000
 NQMom=    0.0000000   0.0000000   0.0000000   0.0000000   0.0000000   0.0000000   0.0000000   0.0000000   0.0000000   0.0000000
 NMagM=    0.0000000   0.0000000   0.0000000   0.0000000   0.0000000   0.0000000   2.7928460   2.7928460   2.7928460   2.7928460
 AtZNuc=   6.0000000   6.0000000   6.0000000   6.0000000   6.0000000   6.0000000   1.0000000   1.0000000   1.0000000   1.0000000

  Atom        11          12          13          14          15          16          17          18          19          20
 IAtWgt=          12          16          12          12          12          12          12          12           1          12
 AtmWgt=  12.0000000  15.9949146  12.0000000  12.0000000  12.0000000  12.0000000  12.0000000  12.0000000   1.0078250  12.0000000
 NucSpn=           0           0           0           0           0           0           0           0           1           0
 AtZEff=   0.0000000   0.0000000   0.0000000   0.0000000   0.0000000   0.0000000   0.0000000   0.0000000   0.0000000   0.0000000
 NQMom=    0.0000000   0.0000000   0.0000000   0.0000000   0.0000000   0.0000000   0.0000000   0.0000000   0.0000000   0.0000000
 NMagM=    0.0000000   0.0000000   0.0000000   0.0000000   0.0000000   0.0000000   0.0000000   0.0000000   2.7928460   0.0000000
 AtZNuc=   6.0000000   8.0000000   6.0000000   6.0000000   6.0000000   6.0000000   6.0000000   6.0000000   1.0000000   6.0000000

  Atom        21          22          23          24
 IAtWgt=           1           1          79          16
 AtmWgt=   1.0078250   1.0078250  78.9183361  15.9949146
 NucSpn=           1           1           3           0
 AtZEff=   0.0000000   0.0000000   0.0000000   0.0000000
 NQMom=    0.0000000   0.0000000  31.3000000   0.0000000
 NMagM=    2.7928460   2.7928460   2.1063990   0.0000000
 AtZNuc=   1.0000000   1.0000000  35.0000000   8.0000000
 Leave Link  101 at Sat Jan 11 17:39:54 2020, MaxMem=   134217728 cpu:         0.0
 (Enter E:\Gaussian\G09W\l202.exe)
                          Input orientation:                          
 ---------------------------------------------------------------------
 Center     Atomic      Atomic             Coordinates (Angstroms)
 Number     Number       Type             X           Y           Z
 ---------------------------------------------------------------------
      1          6           0       -5.088092    0.054699    0.000006
      2          6           0       -4.052824    0.982846   -0.000028
      3          6           0       -2.722773    0.555482   -0.000138
      4          6           0       -2.434870   -0.822412   -0.000168
      5          6           0       -3.481869   -1.747703   -0.000154
      6          6           0       -4.802232   -1.312606   -0.000066
      7          1           0       -6.117669    0.393785    0.000080
      8          1           0       -4.260791    2.045378    0.000000
      9          1           0       -3.246666   -2.804535   -0.000186
     10          1           0       -5.609594   -2.035866   -0.000043
     11          6           0       -1.034438   -1.316931   -0.000153
     12          8           0       -0.777224   -2.512795   -0.000411
     13          6           0       -1.636845    1.570647   -0.000294
     14          6           0        0.053639   -0.298009   -0.000116
     15          6           0       -0.234613    1.076981   -0.000089
     16          6           0        1.379131   -0.735985   -0.000051
     17          6           0        0.814965    1.999274    0.000066
     18          6           0        2.402196    0.201347    0.000080
     19          1           0        1.586073   -1.797609   -0.000080
     20          6           0        2.135850    1.571217    0.000151
     21          1           0        0.586164    3.057406    0.000091
     22          1           0        2.945958    2.289153    0.000261
     23         35           0        4.217896   -0.396415    0.000193
     24          8           0       -1.884424    2.769513    0.000267
 ---------------------------------------------------------------------
                    Distance matrix (angstroms):
                    1          2          3          4          5
     1  C    0.000000
     2  C    1.390409   0.000000
     3  C    2.417751   1.397024   0.000000
     4  C    2.794443   2.424197   1.407651   0.000000
     5  C    2.414250   2.789603   2.425054   1.397272   0.000000
     6  C    1.396868   2.414687   2.795336   2.417580   1.390204
     7  H    1.083978   2.147226   3.398745   3.878420   3.396088
     8  H    2.155743   1.082693   2.141329   3.399736   3.872232
     9  H    3.400892   3.872227   3.400614   2.141921   1.082688
    10  H    2.154629   3.396492   3.879281   3.398727   2.147150
    11  C    4.279425   3.794684   2.521191   1.485180   2.485052
    12  O    5.017530   4.790518   3.633110   2.367527   2.810778
    13  C    3.769510   2.486456   1.486539   2.522613   3.796783
    14  C    5.153814   4.301584   2.904636   2.543163   3.821182
    15  C    4.959972   3.819371   2.542224   2.906686   4.303895
    16  C    6.515378   5.697413   4.300407   3.814980   4.965168
    17  C    6.215099   4.972775   3.821011   4.303875   5.701107
    18  C    7.491723   6.502155   5.137190   4.944218   6.198469
    19  H    6.926437   6.287137   4.909500   4.137510   5.068188
    20  C    7.381407   6.216580   4.963661   5.159549   6.524875
    21  H    6.419769   5.081733   4.148336   4.917279   6.295869
    22  H    8.338989   7.119648   5.927911   6.215718   7.590334
    23  Br   9.316916   8.384937   7.005640   6.666391   7.817440
    24  O    4.199250   2.809651   2.367438   3.633857   4.791354
                    6          7          8          9         10
     6  C    0.000000
     7  H    2.154564   0.000000
     8  H    3.401355   2.485107   0.000000
     9  H    2.155374   4.297896   4.954806   0.000000
    10  H    1.083946   2.482206   4.298351   2.484810   0.000000
    11  C    3.767796   5.363375   4.659879   2.665880   4.631298
    12  O    4.200136   6.080178   5.736914   2.486615   4.855848
    13  C    4.281685   4.632795   2.666545   4.661946   5.365601
    14  C    4.960735   6.209961   4.909763   4.144235   5.923880
    15  C    5.154927   5.922593   4.141003   4.913108   6.211299
    16  C    6.208199   7.581450   6.288458   5.067238   7.108584
    17  C    6.520847   7.116109   5.075965   6.290741   7.586654
    18  C    7.361782   8.522038   6.913454   6.398826   8.318287
    19  H    6.406689   8.009360   6.996740   4.936524   7.199610
    20  C    7.513549   8.337081   6.414191   6.936763   8.544176
    21  H    6.937710   7.213616   4.951482   7.003780   8.020526
    22  H    8.544420   9.259684   7.210871   8.018370   9.586619
    23  Br   9.066538  10.365728   8.823292   7.843388   9.963301
    24  O    5.017699   4.854322   2.484249   5.738093   6.080178
                   11         12         13         14         15
    11  C    0.000000
    12  O    1.223213   0.000000
    13  C    2.949746   4.172942   0.000000
    14  C    1.490676   2.365504   2.519844   0.000000
    15  C    2.523992   3.630553   1.486594   1.404880   0.000000
    16  C    2.482501   2.794087   3.796928   1.395977   2.427141
    17  C    3.797039   4.784750   2.488994   2.420150   1.397225
    18  C    3.757076   4.180344   4.264837   2.401057   2.778398
    19  H    2.664231   2.469142   4.661797   2.144098   3.402670
    20  C    4.288604   5.016488   3.772695   2.798144   2.421438
    21  H    4.664887   5.734629   2.674364   3.397410   2.143772
    22  H    5.370977   6.076248   4.638786   3.880582   3.403732
    23  Br   5.332388   5.424969   6.176352   4.165420   4.689961
    24  O    4.173907   5.397098   1.224163   3.628468   2.363586
                   16         17         18         19         20
    16  C    0.000000
    17  C    2.792835   0.000000
    18  C    1.387535   2.398300   0.000000
    19  H    1.081606   3.874394   2.159139   0.000000
    20  C    2.428128   1.388514   1.395523   3.413392   0.000000
    21  H    3.875385   1.082586   3.384530   4.956913   2.147157
    22  H    3.406818   2.150619   2.157455   4.307077   1.082454
    23  Br   2.859002   4.161642   1.911566   2.981583   2.864697
    24  O    4.789500   2.807128   4.997058   5.736110   4.195059
                   21         22         23         24
    21  H    0.000000
    22  H    2.481701   0.000000
    23  Br   5.011822   2.971549   0.000000
    24  O    2.487305   4.854208   6.874693   0.000000
 Stoichiometry    C14H7BrO2
 Framework group  C1[X(C14H7BrO2)]
 Deg. of freedom    66
 Full point group                 C1      NOp   1
 Largest Abelian subgroup         C1      NOp   1
 Largest concise Abelian subgroup C1      NOp   1
                         Standard orientation:                         
 ---------------------------------------------------------------------
 Center     Atomic      Atomic             Coordinates (Angstroms)
 Number     Number       Type             X           Y           Z
 ---------------------------------------------------------------------
      1          6           0        5.088092    0.054699   -0.000006
      2          6           0        4.052824    0.982846    0.000028
      3          6           0        2.722773    0.555482    0.000138
      4          6           0        2.434870   -0.822412    0.000168
      5          6           0        3.481869   -1.747703    0.000154
      6          6           0        4.802232   -1.312606    0.000066
      7          1           0        6.117669    0.393785   -0.000080
      8          1           0        4.260791    2.045378    0.000000
      9          1           0        3.246666   -2.804535    0.000186
     10          1           0        5.609594   -2.035866    0.000043
     11          6           0        1.034438   -1.316931    0.000153
     12          8           0        0.777224   -2.512795    0.000411
     13          6           0        1.636845    1.570647    0.000294
     14          6           0       -0.053639   -0.298009    0.000116
     15          6           0        0.234613    1.076981    0.000089
     16          6           0       -1.379131   -0.735985    0.000051
     17          6           0       -0.814965    1.999274   -0.000066
     18          6           0       -2.402196    0.201347   -0.000080
     19          1           0       -1.586073   -1.797609    0.000080
     20          6           0       -2.135850    1.571217   -0.000151
     21          1           0       -0.586164    3.057406   -0.000091
     22          1           0       -2.945958    2.289153   -0.000261
     23         35           0       -4.217896   -0.396415   -0.000193
     24          8           0        1.884424    2.769513   -0.000267
 ---------------------------------------------------------------------
 Rotational constants (GHZ):      1.0090757      0.1765797      0.1502817
 Leave Link  202 at Sat Jan 11 17:39:55 2020, MaxMem=   134217728 cpu:         0.0
 (Enter E:\Gaussian\G09W\l301.exe)
 Standard basis: 6-311+G(d) (5D, 7F)
 Ernie: Thresh=  0.10000D-02 Tol=  0.10000D-05 Strict=F.
 There are   440 symmetry adapted cartesian basis functions of A   symmetry.
 There are   421 symmetry adapted basis functions of A   symmetry.
   421 basis functions,   705 primitive gaussians,   440 cartesian basis functions
    71 alpha electrons       71 beta electrons
       nuclear repulsion energy      1372.3998541747 Hartrees.
 IExCor=  402 DFT=T Ex+Corr=B3LYP ExCW=0 ScaHFX=  0.200000
 ScaDFX=  0.800000  0.720000  1.000000  0.810000 ScalE2=  1.000000  1.000000
 IRadAn=      0 IRanWt=     -1 IRanGd=            0 ICorTp=0 IEmpDi=141
 NAtoms=   24 NActive=   24 NUniq=   24 SFac= 1.00D+00 NAtFMM=   60 NAOKFM=F Big=F
 Integral buffers will be    262144 words long.
 Regular integral format.
 Two-electron integral symmetry is turned on.
 R6Disp:  Grimme-D3(BJ) Dispersion energy=       -0.0618839581 Hartrees.
 Nuclear repulsion after empirical dispersion term =     1372.3379702165 Hartrees.
 ------------------------------------------------------------------------------
 Polarizable Continuum Model (PCM)
 =================================
 Model                : PCM (using non-symmetric T matrix).
 Atomic radii         : UFF (Universal Force Field).
 Polarization charges : Total charges.
 Charge compensation  : None.
 Solution method      : On-the-fly selection.
 Cavity type          : Scaled VdW (van der Waals Surface) (Alpha=1.100).
 Cavity algorithm     : GePol (No added spheres)
                        Default sphere list used, NSphG=   24.
                        Lebedev-Laikov grids with approx.  5.0 points / Ang**2.
                        Smoothing algorithm: Karplus/York (Gamma=1.0000).
                        Polarization charges: spherical gaussians, with
                                              point-specific exponents (IZeta= 3).
                        Self-potential: point-specific (ISelfS= 7).
                        Self-field    : sphere-specific E.n sum rule (ISelfD= 2).
 Solvent              : Acetonitrile, Eps=  35.688000 Eps(inf)=   1.806874
 ------------------------------------------------------------------------------
 GePol: Number of generator spheres                  =      24
 GePol: Total number of spheres                      =      24
 GePol: Number of exposed spheres                    =      24 (100.00%)
 GePol: Number of points                             =    2170
 GePol: Average weight of points                     =       0.13
 GePol: Minimum weight of points                     =   0.16D-10
 GePol: Maximum weight of points                     =    0.20577
 GePol: Number of points with low weight             =     135
 GePol: Fraction of low-weight points (<1% of avg)   =       6.22%
 GePol: Cavity surface area                          =    279.588 Ang**2
 GePol: Cavity volume                                =    305.347 Ang**3
 Leave Link  301 at Sat Jan 11 17:39:57 2020, MaxMem=   134217728 cpu:         1.0
 (Enter E:\Gaussian\G09W\l302.exe)
 NPDir=0 NMtPBC=     1 NCelOv=     1 NCel=       1 NClECP=     1 NCelD=      1
         NCelK=      1 NCelE2=     1 NClLst=     1 CellRange=     0.0.
 One-electron integrals computed using PRISM.
 NBasis=   421 RedAO= T EigKep=  1.62D-06  NBF=   421
 NBsUse=   415 1.00D-06 EigRej=  6.69D-07 NBFU=   415
 Precomputing XC quadrature grid using
 IXCGrd= 4 IRadAn=           0 IRanWt=          -1 IRanGd=           0 AccXCQ= 0.00D+00.
 Generated NRdTot=       0 NPtTot=           0 NUsed=           0 NTot=          16
 NSgBfM=   431   431   431   431   431 MxSgAt=    24 MxSgA2=    24.
 Leave Link  302 at Sat Jan 11 17:40:00 2020, MaxMem=   134217728 cpu:         2.0
 (Enter E:\Gaussian\G09W\l308.exe)
 Leave Link  308 at Sat Jan 11 17:40:01 2020, MaxMem=   134217728 cpu:         0.0
 (Enter E:\Gaussian\G09W\l303.exe)
 DipDrv:  MaxL=1.
 Leave Link  303 at Sat Jan 11 17:40:02 2020, MaxMem=   134217728 cpu:         0.0
 (Enter E:\Gaussian\G09W\l401.exe)
 ExpMin= 3.50D-02 ExpMax= 4.40D+05 ExpMxC= 1.51D+04 IAcc=3 IRadAn=         5 AccDes= 0.00D+00
 Harris functional with IExCor=  402 and IRadAn=       5 diagonalized for initial guess.
 HarFok:  IExCor=  402 AccDes= 0.00D+00 IRadAn=         5 IDoV= 1 UseB2=F ITyADJ=14
 ICtDFT=  3500011 ScaDFX=  1.000000  1.000000  1.000000  1.000000
 FoFCou: FMM=F IPFlag=           0 FMFlag=      100000 FMFlg1=           0
         NFxFlg=           0 DoJE=T BraDBF=F KetDBF=T FulRan=T
         wScrn=  0.000000 ICntrl=     500 IOpCl=  0 I1Cent=   200000004 NGrid=           0
         NMat0=    1 NMatS0=      1 NMatT0=    0 NMatD0=    1 NMtDS0=    0 NMtDT0=    0
 Petite list used in FoFCou.
 Harris En= -3262.61606000950    
 JPrj=0 DoOrth=F DoCkMO=F.
 Leave Link  401 at Sat Jan 11 17:40:55 2020, MaxMem=   134217728 cpu:        53.0
 (Enter E:\Gaussian\G09W\l502.exe)
 Closed shell SCF:
 Using DIIS extrapolation, IDIIS=  1040.
 Integral symmetry usage will be decided dynamically.
 IVT=      604602 IEndB=      604602 NGot=   134217728 MDV=   133823807
 LenX=   133823807 LenY=   133629766
 Requested convergence on RMS density matrix=1.00D-08 within 128 cycles.
 Requested convergence on MAX density matrix=1.00D-06.
 Requested convergence on             energy=1.00D-06.
 No special actions if energy rises.
 Fock matrices will be formed incrementally for  20 cycles.

 Cycle   1  Pass 1  IDiag  1:
 FoFJK:  IHMeth= 1 ICntrl=       0 DoSepK=F KAlg= 0 I1Cent=   0 FoldK=F
 IRaf= 830000000 NMat=   1 IRICut=       1 DoRegI=T DoRafI=F ISym2E= 0.
 FoFCou: FMM=F IPFlag=           0 FMFlag=      100000 FMFlg1=           0
         NFxFlg=           0 DoJE=F BraDBF=F KetDBF=F FulRan=T
         wScrn=  0.000000 ICntrl=       0 IOpCl=  0 I1Cent=           0 NGrid=           0
         NMat0=    1 NMatS0=      1 NMatT0=    0 NMatD0=    1 NMtDS0=    0 NMtDT0=    0
 Symmetry not used in FoFCou.
 Inv3:  Mode=1 IEnd=    14126700.
 Iteration    1 A*A^-1 deviation from unit magnitude is 2.22D-15 for   1526.
 Iteration    1 A*A^-1 deviation from orthogonality  is 2.50D-15 for   1124    796.
 Iteration    1 A^-1*A deviation from unit magnitude is 2.11D-15 for    167.
 Iteration    1 A^-1*A deviation from orthogonality  is 1.09D-13 for   1543   1456.
 E= -3262.19965006419    
 DIIS: error= 1.45D-01 at cycle   1 NSaved=   1.
 NSaved= 1 IEnMin= 1 EnMin= -3262.19965006419     IErMin= 1 ErrMin= 1.45D-01
 ErrMax= 1.45D-01  0.00D+00 EMaxC= 1.00D-01 BMatC= 1.59D+00 BMatP= 1.59D+00
 IDIUse=3 WtCom= 0.00D+00 WtEn= 1.00D+00
 Coeff-Com:  0.100D+01
 Coeff-En:   0.100D+01
 Coeff:      0.100D+01
 Gap=     0.174 Goal=   None    Shift=    0.000
 GapD=    0.174 DampG=1.000 DampE=0.250 DampFc=0.2500 IDamp=-1.
 Damping current iteration by 2.50D-01
 RMSDP=1.76D-02 MaxDP=8.82D-01              OVMax= 2.76D-01

 Cycle   2  Pass 1  IDiag  1:
 RMSU=  4.25D-03    CP:  1.03D+00
 E= -3262.32288737301     Delta-E=       -0.123237308827 Rises=F Damp=T
 DIIS: error= 1.09D-01 at cycle   2 NSaved=   2.
 NSaved= 2 IEnMin= 2 EnMin= -3262.32288737301     IErMin= 2 ErrMin= 1.09D-01
 ErrMax= 1.09D-01  0.00D+00 EMaxC= 1.00D-01 BMatC= 6.56D-01 BMatP= 1.59D+00
 IDIUse=3 WtCom= 0.00D+00 WtEn= 1.00D+00
 Coeff-Com: -0.127D+01 0.227D+01
 Coeff-En:   0.000D+00 0.100D+01
 Coeff:      0.000D+00 0.100D+01
 Gap=     0.146 Goal=   None    Shift=    0.000
 RMSDP=9.18D-03 MaxDP=5.86D-01 DE=-1.23D-01 OVMax= 1.64D-01

 Cycle   3  Pass 1  IDiag  1:
 RMSU=  5.93D-03    CP:  1.01D+00  2.64D+00
 E= -3262.48857203038     Delta-E=       -0.165684657369 Rises=F Damp=F
 DIIS: error= 2.16D-02 at cycle   3 NSaved=   3.
 NSaved= 3 IEnMin= 3 EnMin= -3262.48857203038     IErMin= 3 ErrMin= 2.16D-02
 ErrMax= 2.16D-02  0.00D+00 EMaxC= 1.00D-01 BMatC= 1.13D-01 BMatP= 6.56D-01
 IDIUse=3 WtCom= 7.84D-01 WtEn= 2.16D-01
 Coeff-Com:  0.691D+00-0.750D+00 0.106D+01
 Coeff-En:   0.888D-01 0.000D+00 0.911D+00
 Coeff:      0.561D+00-0.588D+00 0.103D+01
 Gap=     0.167 Goal=   None    Shift=    0.000
 RMSDP=3.64D-03 MaxDP=2.50D-01 DE=-1.66D-01 OVMax= 6.27D-02

 Cycle   4  Pass 1  IDiag  1:
 RMSU=  2.16D-03    CP:  9.77D-01  2.07D+00  9.07D-01
 E= -3262.53022178759     Delta-E=       -0.041649757211 Rises=F Damp=F
 DIIS: error= 1.13D-02 at cycle   4 NSaved=   4.
 NSaved= 4 IEnMin= 4 EnMin= -3262.53022178759     IErMin= 4 ErrMin= 1.13D-02
 ErrMax= 1.13D-02  0.00D+00 EMaxC= 1.00D-01 BMatC= 3.09D-02 BMatP= 1.13D-01
 IDIUse=3 WtCom= 8.87D-01 WtEn= 1.13D-01
 Coeff-Com:  0.445D+00-0.562D+00 0.609D+00 0.507D+00
 Coeff-En:   0.000D+00 0.000D+00 0.206D+00 0.794D+00
 Coeff:      0.395D+00-0.499D+00 0.564D+00 0.540D+00
 Gap=     0.149 Goal=   None    Shift=    0.000
 RMSDP=1.41D-03 MaxDP=4.52D-02 DE=-4.16D-02 OVMax= 3.60D-02

 Cycle   5  Pass 1  IDiag  1:
 RMSU=  5.73D-04    CP:  9.67D-01  2.03D+00  9.78D-01  4.83D-01
 E= -3262.55217301996     Delta-E=       -0.021951232366 Rises=F Damp=F
 DIIS: error= 2.80D-03 at cycle   5 NSaved=   5.
 NSaved= 5 IEnMin= 5 EnMin= -3262.55217301996     IErMin= 5 ErrMin= 2.80D-03
 ErrMax= 2.80D-03  0.00D+00 EMaxC= 1.00D-01 BMatC= 1.76D-03 BMatP= 3.09D-02
 IDIUse=3 WtCom= 9.72D-01 WtEn= 2.80D-02
 Coeff-Com:  0.150D+00-0.190D+00 0.233D+00 0.289D+00 0.518D+00
 Coeff-En:   0.000D+00 0.000D+00 0.000D+00 0.000D+00 0.100D+01
 Coeff:      0.146D+00-0.185D+00 0.226D+00 0.281D+00 0.531D+00
 Gap=     0.147 Goal=   None    Shift=    0.000
 RMSDP=3.32D-04 MaxDP=1.83D-02 DE=-2.20D-02 OVMax= 1.16D-02

 Cycle   6  Pass 1  IDiag  1:
 RMSU=  2.10D-04    CP:  9.64D-01  2.04D+00  9.74D-01  5.49D-01  7.28D-01
 E= -3262.55353971886     Delta-E=       -0.001366698900 Rises=F Damp=F
 DIIS: error= 6.74D-04 at cycle   6 NSaved=   6.
 NSaved= 6 IEnMin= 6 EnMin= -3262.55353971886     IErMin= 6 ErrMin= 6.74D-04
 ErrMax= 6.74D-04  0.00D+00 EMaxC= 1.00D-01 BMatC= 7.51D-05 BMatP= 1.76D-03
 IDIUse=3 WtCom= 9.93D-01 WtEn= 6.74D-03
 Coeff-Com:  0.441D-01-0.559D-01 0.754D-01 0.113D+00 0.289D+00 0.534D+00
 Coeff-En:   0.000D+00 0.000D+00 0.000D+00 0.000D+00 0.000D+00 0.100D+01
 Coeff:      0.438D-01-0.555D-01 0.748D-01 0.112D+00 0.287D+00 0.537D+00
 Gap=     0.145 Goal=   None    Shift=    0.000
 RMSDP=1.57D-04 MaxDP=1.21D-02 DE=-1.37D-03 OVMax= 4.11D-03

 Cycle   7  Pass 1  IDiag  1:
 RMSU=  5.48D-05    CP:  9.66D-01  2.05D+00  9.80D-01  5.60D-01  7.45D-01
                    CP:  5.62D-01
 E= -3262.55361022602     Delta-E=       -0.000070507161 Rises=F Damp=F
 DIIS: error= 2.84D-04 at cycle   7 NSaved=   7.
 NSaved= 7 IEnMin= 7 EnMin= -3262.55361022602     IErMin= 7 ErrMin= 2.84D-04
 ErrMax= 2.84D-04  0.00D+00 EMaxC= 1.00D-01 BMatC= 1.07D-05 BMatP= 7.51D-05
 IDIUse=3 WtCom= 9.97D-01 WtEn= 2.84D-03
 Coeff-Com:  0.787D-02-0.988D-02 0.169D-01 0.314D-01 0.105D+00 0.325D+00
 Coeff-Com:  0.524D+00
 Coeff-En:   0.000D+00 0.000D+00 0.000D+00 0.000D+00 0.000D+00 0.993D-01
 Coeff-En:   0.901D+00
 Coeff:      0.785D-02-0.985D-02 0.169D-01 0.313D-01 0.104D+00 0.324D+00
 Coeff:      0.525D+00
 Gap=     0.145 Goal=   None    Shift=    0.000
 RMSDP=2.68D-05 MaxDP=1.24D-03 DE=-7.05D-05 OVMax= 1.09D-03

 Cycle   8  Pass 1  IDiag  1:
 RMSU=  1.87D-05    CP:  9.66D-01  2.05D+00  9.78D-01  5.61D-01  7.51D-01
                    CP:  5.98D-01  8.66D-01
 E= -3262.55362072669     Delta-E=       -0.000010500672 Rises=F Damp=F
 DIIS: error= 3.60D-05 at cycle   8 NSaved=   8.
 NSaved= 8 IEnMin= 8 EnMin= -3262.55362072669     IErMin= 8 ErrMin= 3.60D-05
 ErrMax= 3.60D-05  0.00D+00 EMaxC= 1.00D-01 BMatC= 6.21D-07 BMatP= 1.07D-05
 IDIUse=1 WtCom= 1.00D+00 WtEn= 0.00D+00
 Coeff-Com: -0.774D-03 0.107D-02 0.984D-03 0.431D-02 0.232D-01 0.114D+00
 Coeff-Com:  0.256D+00 0.601D+00
 Coeff:     -0.774D-03 0.107D-02 0.984D-03 0.431D-02 0.232D-01 0.114D+00
 Coeff:      0.256D+00 0.601D+00
 Gap=     0.145 Goal=   None    Shift=    0.000
 RMSDP=9.71D-06 MaxDP=6.19D-04 DE=-1.05D-05 OVMax= 2.08D-04

 Cycle   9  Pass 1  IDiag  1:
 RMSU=  5.89D-06    CP:  9.66D-01  2.05D+00  9.77D-01  5.61D-01  7.55D-01
                    CP:  5.97D-01  9.04D-01  7.83D-01
 E= -3262.55362128595     Delta-E=       -0.000000559258 Rises=F Damp=F
 DIIS: error= 1.13D-05 at cycle   9 NSaved=   9.
 NSaved= 9 IEnMin= 9 EnMin= -3262.55362128595     IErMin= 9 ErrMin= 1.13D-05
 ErrMax= 1.13D-05  0.00D+00 EMaxC= 1.00D-01 BMatC= 7.21D-08 BMatP= 6.21D-07
 IDIUse=1 WtCom= 1.00D+00 WtEn= 0.00D+00
 Coeff-Com: -0.943D-03 0.125D-02-0.375D-03 0.970D-03 0.858D-02 0.519D-01
 Coeff-Com:  0.123D+00 0.346D+00 0.470D+00
 Coeff:     -0.943D-03 0.125D-02-0.375D-03 0.970D-03 0.858D-02 0.519D-01
 Coeff:      0.123D+00 0.346D+00 0.470D+00
 Gap=     0.145 Goal=   None    Shift=    0.000
 RMSDP=1.96D-06 MaxDP=8.50D-05 DE=-5.59D-07 OVMax= 8.54D-05

 Cycle  10  Pass 1  IDiag  1:
 RMSU=  1.47D-06    CP:  9.66D-01  2.05D+00  9.77D-01  5.61D-01  7.55D-01
                    CP:  5.99D-01  9.00D-01  7.98D-01  8.99D-01
 E= -3262.55362134618     Delta-E=       -0.000000060226 Rises=F Damp=F
 DIIS: error= 3.84D-06 at cycle  10 NSaved=  10.
 NSaved=10 IEnMin=10 EnMin= -3262.55362134618     IErMin=10 ErrMin= 3.84D-06
 ErrMax= 3.84D-06  0.00D+00 EMaxC= 1.00D-01 BMatC= 3.96D-09 BMatP= 7.21D-08
 IDIUse=1 WtCom= 1.00D+00 WtEn= 0.00D+00
 Coeff-Com: -0.370D-03 0.489D-03-0.227D-03 0.196D-03 0.222D-02 0.159D-01
 Coeff-Com:  0.374D-01 0.116D+00 0.231D+00 0.598D+00
 Coeff:     -0.370D-03 0.489D-03-0.227D-03 0.196D-03 0.222D-02 0.159D-01
 Coeff:      0.374D-01 0.116D+00 0.231D+00 0.598D+00
 Gap=     0.145 Goal=   None    Shift=    0.000
 RMSDP=7.85D-07 MaxDP=3.34D-05 DE=-6.02D-08 OVMax= 2.61D-05

 Cycle  11  Pass 1  IDiag  1:
 RMSU=  5.62D-07    CP:  9.66D-01  2.05D+00  9.77D-01  5.60D-01  7.55D-01
                    CP:  6.00D-01  9.00D-01  7.92D-01  8.75D-01  8.14D-01
 E= -3262.55362134962     Delta-E=       -0.000000003445 Rises=F Damp=F
 DIIS: error= 1.72D-06 at cycle  11 NSaved=  11.
 NSaved=11 IEnMin=11 EnMin= -3262.55362134962     IErMin=11 ErrMin= 1.72D-06
 ErrMax= 1.72D-06  0.00D+00 EMaxC= 1.00D-01 BMatC= 7.80D-10 BMatP= 3.96D-09
 IDIUse=1 WtCom= 1.00D+00 WtEn= 0.00D+00
 Coeff-Com: -0.878D-04 0.115D-03-0.674D-04 0.123D-04 0.200D-03 0.274D-02
 Coeff-Com:  0.674D-02 0.252D-01 0.750D-01 0.351D+00 0.539D+00
 Coeff:     -0.878D-04 0.115D-03-0.674D-04 0.123D-04 0.200D-03 0.274D-02
 Coeff:      0.674D-02 0.252D-01 0.750D-01 0.351D+00 0.539D+00
 Gap=     0.145 Goal=   None    Shift=    0.000
 RMSDP=2.22D-07 MaxDP=7.49D-06 DE=-3.45D-09 OVMax= 7.34D-06

 Cycle  12  Pass 1  IDiag  1:
 RMSU=  1.46D-07    CP:  9.66D-01  2.05D+00  9.77D-01  5.61D-01  7.55D-01
                    CP:  6.00D-01  9.00D-01  7.95D-01  8.79D-01  8.70D-01
                    CP:  8.77D-01
 E= -3262.55362135020     Delta-E=       -0.000000000579 Rises=F Damp=F
 DIIS: error= 4.69D-07 at cycle  12 NSaved=  12.
 NSaved=12 IEnMin=12 EnMin= -3262.55362135020     IErMin=12 ErrMin= 4.69D-07
 ErrMax= 4.69D-07  0.00D+00 EMaxC= 1.00D-01 BMatC= 7.21D-11 BMatP= 7.80D-10
 IDIUse=1 WtCom= 1.00D+00 WtEn= 0.00D+00
 Coeff-Com: -0.244D-04 0.314D-04-0.246D-04-0.151D-04-0.444D-04 0.297D-03
 Coeff-Com:  0.116D-02 0.569D-02 0.263D-01 0.151D+00 0.293D+00 0.522D+00
 Coeff:     -0.244D-04 0.314D-04-0.246D-04-0.151D-04-0.444D-04 0.297D-03
 Coeff:      0.116D-02 0.569D-02 0.263D-01 0.151D+00 0.293D+00 0.522D+00
 Gap=     0.145 Goal=   None    Shift=    0.000
 RMSDP=1.06D-07 MaxDP=7.09D-06 DE=-5.79D-10 OVMax= 2.45D-06

 Cycle  13  Pass 1  IDiag  1:
 RMSU=  6.36D-08    CP:  9.66D-01  2.05D+00  9.77D-01  5.61D-01  7.55D-01
                    CP:  6.00D-01  9.00D-01  7.95D-01  8.81D-01  8.85D-01
                    CP:  8.84D-01  7.49D-01
 E= -3262.55362135017     Delta-E=        0.000000000028 Rises=F Damp=F
 DIIS: error= 2.34D-07 at cycle  13 NSaved=  13.
 NSaved=13 IEnMin=12 EnMin= -3262.55362135020     IErMin=13 ErrMin= 2.34D-07
 ErrMax= 2.34D-07  0.00D+00 EMaxC= 1.00D-01 BMatC= 1.77D-11 BMatP= 7.21D-11
 IDIUse=1 WtCom= 1.00D+00 WtEn= 0.00D+00
 Coeff-Com:  0.246D-05-0.355D-05-0.400D-05-0.176D-04-0.765D-04-0.503D-03
 Coeff-Com: -0.786D-03-0.220D-02 0.192D-02 0.285D-01 0.802D-01 0.337D+00
 Coeff-Com:  0.556D+00
 Coeff:      0.246D-05-0.355D-05-0.400D-05-0.176D-04-0.765D-04-0.503D-03
 Coeff:     -0.786D-03-0.220D-02 0.192D-02 0.285D-01 0.802D-01 0.337D+00
 Coeff:      0.556D+00
 Gap=     0.145 Goal=   None    Shift=    0.000
 RMSDP=5.97D-08 MaxDP=3.82D-06 DE= 2.82D-11 OVMax= 9.21D-07

 Cycle  14  Pass 1  IDiag  1:
 RMSU=  2.28D-08    CP:  9.66D-01  2.05D+00  9.77D-01  5.61D-01  7.55D-01
                    CP:  6.00D-01  9.00D-01  7.95D-01  8.83D-01  8.85D-01
                    CP:  8.69D-01  8.47D-01  8.09D-01
 E= -3262.55362135042     Delta-E=       -0.000000000251 Rises=F Damp=F
 DIIS: error= 4.74D-08 at cycle  14 NSaved=  14.
 NSaved=14 IEnMin=14 EnMin= -3262.55362135042     IErMin=14 ErrMin= 4.74D-08
 ErrMax= 4.74D-08  0.00D+00 EMaxC= 1.00D-01 BMatC= 1.15D-12 BMatP= 1.77D-11
 IDIUse=1 WtCom= 1.00D+00 WtEn= 0.00D+00
 Coeff-Com:  0.279D-05-0.382D-05-0.120D-05-0.921D-05-0.383D-04-0.314D-03
 Coeff-Com: -0.487D-03-0.161D-02-0.691D-03 0.605D-02 0.263D-01 0.147D+00
 Coeff-Com:  0.291D+00 0.533D+00
 Coeff:      0.279D-05-0.382D-05-0.120D-05-0.921D-05-0.383D-04-0.314D-03
 Coeff:     -0.487D-03-0.161D-02-0.691D-03 0.605D-02 0.263D-01 0.147D+00
 Coeff:      0.291D+00 0.533D+00
 Gap=     0.145 Goal=   None    Shift=    0.000
 RMSDP=1.76D-08 MaxDP=1.24D-06 DE=-2.51D-10 OVMax= 2.71D-07

 Cycle  15  Pass 1  IDiag  1:
 RMSU=  8.92D-09    CP:  9.66D-01  2.05D+00  9.77D-01  5.61D-01  7.55D-01
                    CP:  6.00D-01  9.00D-01  7.96D-01  8.84D-01  8.87D-01
                    CP:  8.72D-01  8.54D-01  8.47D-01  9.06D-01
 E= -3262.55362135032     Delta-E=        0.000000000102 Rises=F Damp=F
 DIIS: error= 1.84D-08 at cycle  15 NSaved=  15.
 NSaved=15 IEnMin=14 EnMin= -3262.55362135042     IErMin=15 ErrMin= 1.84D-08
 ErrMax= 1.84D-08  0.00D+00 EMaxC= 1.00D-01 BMatC= 1.11D-13 BMatP= 1.15D-12
 IDIUse=1 WtCom= 1.00D+00 WtEn= 0.00D+00
 Coeff-Com:  0.826D-06-0.113D-05-0.323D-06-0.236D-05-0.785D-05-0.838D-04
 Coeff-Com: -0.990D-04-0.423D-03-0.666D-03-0.187D-02 0.153D-03 0.173D-01
 Coeff-Com:  0.489D-01 0.250D+00 0.686D+00
 Coeff:      0.826D-06-0.113D-05-0.323D-06-0.236D-05-0.785D-05-0.838D-04
 Coeff:     -0.990D-04-0.423D-03-0.666D-03-0.187D-02 0.153D-03 0.173D-01
 Coeff:      0.489D-01 0.250D+00 0.686D+00
 Gap=     0.145 Goal=   None    Shift=    0.000
 RMSDP=8.38D-09 MaxDP=5.44D-07 DE= 1.02D-10 OVMax= 7.09D-08

 Error on total polarization charges =  0.01852
 SCF Done:  E(RB3LYP) =  -3262.55362135     A.U. after   15 cycles
            NFock= 15  Conv=0.84D-08     -V/T= 2.0018
 KE= 3.256664915611D+03 PE=-1.050034931000D+04 EE= 2.608792802824D+03
 Leave Link  502 at Sat Jan 11 18:10:39 2020, MaxMem=   134217728 cpu:      1783.0
 (Enter E:\Gaussian\G09W\l801.exe)
 DoSCS=F DFT=T ScalE2(SS,OS)=  1.000000  1.000000
 ExpMin= 3.50D-02 ExpMax= 4.40D+05 ExpMxC= 1.51D+04 IAcc=3 IRadAn=         5 AccDes= 0.00D+00
 HarFok:  IExCor=  205 AccDes= 0.00D+00 IRadAn=         5 IDoV=-2 UseB2=F ITyADJ=14
 ICtDFT= 12500011 ScaDFX=  1.000000  1.000000  1.000000  1.000000
 Largest valence mixing into a core orbital is  2.28D-04
 Largest core mixing into a valence orbital is  1.50D-05
 Range of M.O.s used for correlation:    31   415
 NBasis=   421 NAE=    71 NBE=    71 NFC=    30 NFV=     0
 NROrb=    385 NOA=    41 NOB=    41 NVA=   344 NVB=   344

 **** Warning!!: The largest alpha MO coefficient is  0.13895767D+03

 Leave Link  801 at Sat Jan 11 18:10:42 2020, MaxMem=   134217728 cpu:         2.0
 (Enter E:\Gaussian\G09W\l914.exe)
 RHF ground state
 MDV=   134217728 DFT=T DoStab=F Mixed=T DoRPA=T DoScal=F NonHer=T
 NEqPCM:  Using non-equilibrium solvation (IEInf=1, Eps=  35.6880, EpsInf=   1.8069)
 Inv3:  Mode=1 IEnd=    14126700.
 Iteration    1 A*A^-1 deviation from unit magnitude is 2.55D-15 for    744.
 Iteration    1 A*A^-1 deviation from orthogonality  is 1.84D-15 for   1355    162.
 Iteration    1 A^-1*A deviation from unit magnitude is 2.11D-15 for   1474.
 Iteration    1 A^-1*A deviation from orthogonality  is 9.22D-16 for   1482   1255.
 Making orbital integer symmetry assigments:
 Orbital symmetries:
       Occupied  (A) (A) (A) (A) (A) (A) (A) (A) (A) (A) (A) (A)
                 (A) (A) (A) (A) (A) (A) (A) (A) (A) (A) (A) (A)
                 (A) (A) (A) (A) (A) (A) (A) (A) (A) (A) (A) (A)
                 (A) (A) (A) (A) (A) (A) (A) (A) (A) (A) (A) (A)
                 (A) (A) (A) (A) (A) (A) (A) (A) (A) (A) (A) (A)
                 (A) (A) (A) (A) (A) (A) (A) (A) (A) (A) (A)
       Virtual   (A) (A) (A) (A) (A) (A) (A) (A) (A) (A) (A) (A)
                 (A) (A) (A) (A) (A) (A) (A) (A) (A) (A) (A) (A)
                 (A) (A) (A) (A) (A) (A) (A) (A) (A) (A) (A) (A)
                 (A) (A) (A) (A) (A) (A) (A) (A) (A) (A) (A) (A)
                 (A) (A) (A) (A) (A) (A) (A) (A) (A) (A) (A) (A)
                 (A) (A) (A) (A) (A) (A) (A) (A) (A) (A) (A) (A)
                 (A) (A) (A) (A) (A) (A) (A) (A) (A) (A) (A) (A)
                 (A) (A) (A) (A) (A) (A) (A) (A) (A) (A) (A) (A)
                 (A) (A) (A) (A) (A) (A) (A) (A) (A) (A) (A) (A)
                 (A) (A) (A) (A) (A) (A) (A) (A) (A) (A) (A) (A)
                 (A) (A) (A) (A) (A) (A) (A) (A) (A) (A) (A) (A)
                 (A) (A) (A) (A) (A) (A) (A) (A) (A) (A) (A) (A)
                 (A) (A) (A) (A) (A) (A) (A) (A) (A) (A) (A) (A)
                 (A) (A) (A) (A) (A) (A) (A) (A) (A) (A) (A) (A)
                 (A) (A) (A) (A) (A) (A) (A) (A) (A) (A) (A) (A)
                 (A) (A) (A) (A) (A) (A) (A) (A) (A) (A) (A) (A)
                 (A) (A) (A) (A) (A) (A) (A) (A) (A) (A) (A) (A)
                 (A) (A) (A) (A) (A) (A) (A) (A) (A) (A) (A) (A)
                 (A) (A) (A) (A) (A) (A) (A) (A) (A) (A) (A) (A)
                 (A) (A) (A) (A) (A) (A) (A) (A) (A) (A) (A) (A)
                 (A) (A) (A) (A) (A) (A) (A) (A) (A) (A) (A) (A)
                 (A) (A) (A) (A) (A) (A) (A) (A) (A) (A) (A) (A)
                 (A) (A) (A) (A) (A) (A) (A) (A) (A) (A) (A) (A)
                 (A) (A) (A) (A) (A) (A) (A) (A) (A) (A) (A) (A)
                 (A) (A) (A) (A) (A) (A) (A) (A) (A) (A) (A) (A)
                 (A) (A) (A) (A) (A) (A) (A) (A) (A) (A) (A) (A)
                 (A) (A) (A) (A) (A) (A) (A) (A) (A) (A) (A) (A)
                 (A) (A) (A) (A) (A) (A) (A) (A) (A) (A) (A) (A)
                 (A) (A) (A) (A) (A) (A) (A) (A)
    48 initial guesses have been made.
 Convergence on wavefunction:    0.001000000000000
 Davidson Disk Diagonalization:  ConvIn= 1.00D-03 SkipCon=T Conv= 1.00D-03.
 Max sub-space:   200 roots to seek:    48 dimension of matrix:        28208
 Iteration     1 Dimension    48 NMult     0 NNew     48
 CISAX will form    48 AO SS matrices at one time.
 NMat=    48 NSing=    24 JSym2X= 0.
 FoFJK:  IHMeth= 1 ICntrl=       0 DoSepK=F KAlg= 0 I1Cent=   0 FoldK=F
 IRaf=         0 NMat=  96 IRICut=     120 DoRegI=T DoRafI=T ISym2E= 0.
 New state      1 was old state      4
 New state      3 was old state     12
 New state      4 was old state      3
 New state      5 was old state      6
 New state      6 was old state      8
 New state      7 was old state     10
 New state      8 was old state     11
 New state      9 was old state      1
 New state     10 was old state      5
 New state     11 was old state      7
 New state     12 was old state     16
 Excitation Energies [eV] at current iteration:
 Root      1 :     2.780022841381127
 Root      2 :     2.906536720634124
 Root      3 :     3.069798435747589
 Root      4 :     3.100453528961918
 Root      5 :     3.129554299264855
 Root      6 :     3.151331447719792
 Root      7 :     3.385594808881094
 Root      8 :     3.390239984419848
 Root      9 :     3.516755335637685
 Root     10 :     3.869064674023836
 Root     11 :     4.011793169729520
 Root     12 :     4.053053851564256
 Root     13 :     4.114706701636655
 Root     14 :     4.400043488465959
 Root     15 :     4.435624788411794
 Root     16 :     4.451370043158090
 Root     17 :     4.502050094953868
 Root     18 :     4.510112909812237
 Root     19 :     4.548639178054908
 Root     20 :     4.660312673157957
 Root     21 :     4.834350942557294
 Root     22 :     4.839516528957904
 Root     23 :     4.870718337662503
 Root     24 :     4.927527427846533
 Root     25 :     5.060578466304794
 Root     26 :     5.131848774129550
 Root     27 :     5.310663367269381
 Root     28 :     5.312376765119463
 Root     29 :     5.421128876951445
 Root     30 :     5.452234933466149
 Root     31 :     5.492524348355697
 Root     32 :     5.500662041167893
 Root     33 :     5.548929874621035
 Root     34 :     5.569762192711194
 Root     35 :     5.595561395329933
 Root     36 :     5.602428312931541
 Root     37 :     5.621698394684431
 Root     38 :     5.683054339217790
 Root     39 :     5.693720892982862
 Root     40 :     5.715768322435978
 Root     41 :     5.800624366036524
 Root     42 :     5.836110391363186
 Root     43 :     5.893541708720698
 Root     44 :     6.060807300452622
 Root     45 :     6.324728173093971
 Root     46 :     6.730571113877844
 Root     47 :     6.878011238629568
 Root     48 :     7.471204406492252
 Vector  12 SDiff=7.46D-05 TDiff=6.49D+00 assumed to be singlet.
 Vector  24 SDiff=7.52D-05 TDiff=5.89D+00 assumed to be singlet.
 Iteration     2 Dimension    72 NMult    48 NNew     24
 CISAX will form    24 AO SS matrices at one time.
 NMat=    24 NSing=    12 JSym2X= 0.
 Root      1 not converged, maximum delta is    0.079394520582826
 Root      2 not converged, maximum delta is    0.098129339325161
 New state      3 was old state      6
 Root      3 not converged, maximum delta is    0.269351405618576
 New state      4 was old state      3
 Root      4 not converged, maximum delta is    0.089999368489557
 Root      5 not converged, maximum delta is    0.272884259781506
 New state      6 was old state      4
 Root      6 not converged, maximum delta is    0.036293977538577
 Root      7 not converged, maximum delta is    0.156860660302061
 Root      8 not converged, maximum delta is    0.044717317749781
 Root      9 not converged, maximum delta is    0.054029145162083
 Root     10 not converged, maximum delta is    0.124010134021109
 Root     11 not converged, maximum delta is    0.117426560768664
 New state     12 was old state     16
 Root     12 not converged, maximum delta is    0.042512456883866
 Excitation Energies [eV] at current iteration:
 Root      1 :     2.622519446631312   Change is   -0.157503394749815
 Root      2 :     2.743940767484590   Change is   -0.162595953149533
 Root      3 :     2.880711632695278   Change is   -0.270619815024514
 Root      4 :     2.889347544709567   Change is   -0.180450891038022
 Root      5 :     3.007344419339431   Change is   -0.122209879925424
 Root      6 :     3.028311282111601   Change is   -0.072142246850317
 Root      7 :     3.258049790499978   Change is   -0.127545018381117
 Root      8 :     3.310990496574528   Change is   -0.079249487845320
 Root      9 :     3.328760466150304   Change is   -0.187994869487381
 Root     10 :     3.689333770665775   Change is   -0.179730903358061
 Root     11 :     3.766655248701983   Change is   -0.245137921027537
 Root     12 :     4.436187219155879   Change is   -0.015182824002212
 Iteration     3 Dimension    96 NMult    72 NNew     24
 CISAX will form    24 AO SS matrices at one time.
 NMat=    24 NSing=    12 JSym2X= 0.
 Root      1 not converged, maximum delta is    0.004259478889359
 Root      2 not converged, maximum delta is    0.015032165685308
 Root      3 not converged, maximum delta is    0.015869502272697
 Root      4 not converged, maximum delta is    0.004136200818097
 Root      5 not converged, maximum delta is    0.030077992260344
 Root      6 not converged, maximum delta is    0.003589762657481
 Root      7 not converged, maximum delta is    0.017806102729739
 Root      8 not converged, maximum delta is    0.004056522718901
 Root      9 not converged, maximum delta is    0.009535835919522
 Root     10 not converged, maximum delta is    0.027361998456551
 Root     11 not converged, maximum delta is    0.030059614657251
 Root     12 not converged, maximum delta is    0.014938879012217
 Excitation Energies [eV] at current iteration:
 Root      1 :     2.619833892021438   Change is   -0.002685554609875
 Root      2 :     2.725777924764018   Change is   -0.018162842720572
 Root      3 :     2.859402347078610   Change is   -0.021309285616669
 Root      4 :     2.886719753066811   Change is   -0.002627791642756
 Root      5 :     2.993083507405962   Change is   -0.014260911933469
 Root      6 :     3.025859732856761   Change is   -0.002451549254840
 Root      7 :     3.249388191451072   Change is   -0.008661599048906
 Root      8 :     3.309267569246141   Change is   -0.001722927328387
 Root      9 :     3.319164903496370   Change is   -0.009595562653934
 Root     10 :     3.673883367713953   Change is   -0.015450402951823
 Root     11 :     3.752262660786910   Change is   -0.014392587915073
 Root     12 :     4.431568518314573   Change is   -0.004618700841306
 Iteration     4 Dimension   120 NMult    96 NNew     24
 CISAX will form    24 AO SS matrices at one time.
 NMat=    24 NSing=    12 JSym2X= 0.
 Root      1 not converged, maximum delta is    0.001117202384185
 Root      2 not converged, maximum delta is    0.002157158639728
 Root      3 not converged, maximum delta is    0.002934496102132
 Root      4 has converged.
 Root      5 not converged, maximum delta is    0.002545911961909
 Root      6 has converged.
 Root      7 not converged, maximum delta is    0.003116159628531
 Root      8 has converged.
 Root      9 not converged, maximum delta is    0.002423100043423
 Root     10 not converged, maximum delta is    0.005324418809796
 Root     11 not converged, maximum delta is    0.006130780544200
 No map to state     12
 Excitation Energies [eV] at current iteration:
 Root      1 :     2.619754358427923   Change is   -0.000079533593515
 Root      2 :     2.724895584484091   Change is   -0.000882340279927
 Root      3 :     2.858491609777258   Change is   -0.000910737301352
 Root      4 :     2.886637685174389   Change is   -0.000082067892422
 Root      5 :     2.992251584216728   Change is   -0.000831923189234
 Root      6 :     3.025763608410194   Change is   -0.000096124446567
 Root      7 :     3.248772294303371   Change is   -0.000615897147700
 Root      8 :     3.309207910478514   Change is   -0.000059658767627
 Root      9 :     3.317838720214139   Change is   -0.001326183282231
 Root     10 :     3.672162272046647   Change is   -0.001721095667306
 Root     11 :     3.750416425606869   Change is   -0.001846235180041
 Root     12 :     4.283352315562605
 Iteration     5 Dimension   138 NMult   120 NNew     18
 CISAX will form    18 AO SS matrices at one time.
 NMat=    18 NSing=     8 JSym2X= 0.
 Root      1 has converged.
 Root      2 has converged.
 Root      3 has converged.
 Root      4 has converged.
 Root      5 has converged.
 Root      6 has converged.
 Root      7 has converged.
 Root      8 has converged.
 Root      9 has converged.
 Root     10 not converged, maximum delta is    0.001150383512556
 Root     11 not converged, maximum delta is    0.001450934916409
 Root     12 not converged, maximum delta is    0.041442297845825
 Excitation Energies [eV] at current iteration:
 Root      1 :     2.619751350853512   Change is   -0.000003007574411
 Root      2 :     2.724863314447880   Change is   -0.000032270036211
 Root      3 :     2.858457385676724   Change is   -0.000034224100534
 Root      4 :     2.886637675464398   Change is   -0.000000009709991
 Root      5 :     2.992214776980571   Change is   -0.000036807236157
 Root      6 :     3.025763545142525   Change is   -0.000000063267669
 Root      7 :     3.248730865267922   Change is   -0.000041429035449
 Root      8 :     3.309207859173867   Change is   -0.000000051304647
 Root      9 :     3.317726636605426   Change is   -0.000112083608713
 Root     10 :     3.671903642365223   Change is   -0.000258629681424
 Root     11 :     3.750184445708811   Change is   -0.000231979898058
 Root     12 :     4.195877316573713   Change is   -0.087474998988892
 Iteration     6 Dimension   144 NMult   138 NNew      6
 CISAX will form     6 AO SS matrices at one time.
 NMat=     6 NSing=     6 JSym2X= 0.
 Root      1 has converged.
 Root      2 has converged.
 Root      3 has converged.
 Root      4 has converged.
 Root      5 has converged.
 Root      6 has converged.
 Root      7 has converged.
 Root      8 has converged.
 Root      9 has converged.
 Root     10 has converged.
 Root     11 has converged.
 Root     12 not converged, maximum delta is    0.005131010995207
 Excitation Energies [eV] at current iteration:
 Root      1 :     2.619751350853512   Change is    0.000000000000000
 Root      2 :     2.724863314447941   Change is    0.000000000000060
 Root      3 :     2.858457385676667   Change is   -0.000000000000058
 Root      4 :     2.886637675464597   Change is    0.000000000000199
 Root      5 :     2.992214776980461   Change is   -0.000000000000110
 Root      6 :     3.025763520149951   Change is   -0.000000024992574
 Root      7 :     3.248730865267998   Change is    0.000000000000076
 Root      8 :     3.309207845587079   Change is   -0.000000013586788
 Root      9 :     3.317721903132788   Change is   -0.000004733472637
 Root     10 :     3.671882730793608   Change is   -0.000020911571615
 Root     11 :     3.750170623796890   Change is   -0.000013821911921
 Root     12 :     4.188360246819869   Change is   -0.007517069753844
 Iteration     7 Dimension   146 NMult   144 NNew      2
 CISAX will form     2 AO SS matrices at one time.
 NMat=     2 NSing=     2 JSym2X= 0.
 Root      1 has converged.
 Root      2 has converged.
 Root      3 has converged.
 Root      4 has converged.
 Root      5 has converged.
 Root      6 has converged.
 Root      7 has converged.
 Root      8 has converged.
 Root      9 has converged.
 Root     10 has converged.
 Root     11 has converged.
 Root     12 not converged, maximum delta is    0.001426386681601
 Excitation Energies [eV] at current iteration:
 Root      1 :     2.619751350853669   Change is    0.000000000000157
 Root      2 :     2.724863314447910   Change is   -0.000000000000030
 Root      3 :     2.858457385676638   Change is   -0.000000000000029
 Root      4 :     2.886637675464512   Change is   -0.000000000000085
 Root      5 :     2.992214776980379   Change is   -0.000000000000082
 Root      6 :     3.025763510916696   Change is   -0.000000009233255
 Root      7 :     3.248730865267948   Change is   -0.000000000000051
 Root      8 :     3.309207817124548   Change is   -0.000000028462531
 Root      9 :     3.317721882586126   Change is   -0.000000020546662
 Root     10 :     3.671882671346210   Change is   -0.000000059447398
 Root     11 :     3.750170459556432   Change is   -0.000000164240459
 Root     12 :     4.187883399885990   Change is   -0.000476846933880
 Iteration     8 Dimension   148 NMult   146 NNew      2
 CISAX will form     2 AO SS matrices at one time.
 NMat=     2 NSing=     2 JSym2X= 0.
 Root      1 has converged.
 Root      2 has converged.
 Root      3 has converged.
 Root      4 has converged.
 Root      5 has converged.
 Root      6 has converged.
 Root      7 has converged.
 Root      8 has converged.
 Root      9 has converged.
 Root     10 has converged.
 Root     11 has converged.
 Root     12 has converged.
 Excitation Energies [eV] at current iteration:
 Root      1 :     2.619751350853575   Change is   -0.000000000000094
 Root      2 :     2.724863314447880   Change is   -0.000000000000030
 Root      3 :     2.858457385676696   Change is    0.000000000000058
 Root      4 :     2.886637675464626   Change is    0.000000000000114
 Root      5 :     2.992214776980544   Change is    0.000000000000165
 Root      6 :     3.025763506883214   Change is   -0.000000004033482
 Root      7 :     3.248730865267948   Change is    0.000000000000000
 Root      8 :     3.309207805323381   Change is   -0.000000011801166
 Root      9 :     3.317721720018123   Change is   -0.000000162568003
 Root     10 :     3.671882621960485   Change is   -0.000000049385724
 Root     11 :     3.750170400365200   Change is   -0.000000059191232
 Root     12 :     4.187837596681495   Change is   -0.000045803204495
 Convergence achieved on expansion vectors.
 ***********************************************************************
 Excited states from <AA,BB:AA,BB> singles matrix:
 ***********************************************************************
 
 1PDM for each excited state written to RWF  633
 Ground to excited state transition densities written to RWF  633
 Ground to excited state transition electric dipole moments (Au):
       state          X           Y           Z        Dip. S.      Osc.
         1         0.0000      0.0000      0.0000      0.0000      0.0000
         2         0.0000      0.0000      0.0000      0.0000      0.0000
         3         0.0000      0.0000      0.0000      0.0000      0.0000
         4         0.0000      0.0000      0.0000      0.0000      0.0000
         5         0.0000      0.0000      0.0000      0.0000      0.0000
         6        -0.0005      0.0001      0.0024      0.0000      0.0000
         7         0.0000      0.0000      0.0000      0.0000      0.0000
         8        -0.0087     -0.0015     -0.0003      0.0001      0.0000
         9         0.6945      0.1382      0.0000      0.5015      0.0408
        10         1.0887     -0.1693      0.0000      1.2140      0.1092
        11         0.7105      0.2357     -0.0001      0.5604      0.0515
        12        -0.3022     -1.2573      0.0001      1.6720      0.1716
 Ground to excited state transition velocity dipole moments (Au):
       state          X           Y           Z        Dip. S.      Osc.
         1         0.0000      0.0000      0.0000      0.0000      0.0000
         2         0.0000      0.0000      0.0000      0.0000      0.0000
         3         0.0000      0.0000      0.0000      0.0000      0.0000
         4         0.0000      0.0000      0.0000      0.0000      0.0000
         5         0.0000      0.0000      0.0000      0.0000      0.0000
         6         0.0001      0.0000     -0.0004      0.0000      0.0000
         7         0.0000      0.0000      0.0000      0.0000      0.0000
         8         0.0011      0.0002      0.0001      0.0000      0.0000
         9        -0.0841     -0.0157      0.0000      0.0073      0.0400
        10        -0.1500      0.0238      0.0000      0.0231      0.1139
        11        -0.0987     -0.0305      0.0000      0.0107      0.0516
        12         0.0417      0.1845      0.0001      0.0358      0.1551
 Ground to excited state transition magnetic dipole moments (Au):
       state          X           Y           Z
         1         0.0000      0.0000      0.0000
         2         0.0000      0.0000      0.0000
         3         0.0000      0.0000      0.0000
         4         0.0000      0.0000      0.0000
         5         0.0000      0.0000      0.0000
         6        -0.1668     -0.7763     -0.0006
         7         0.0000      0.0000      0.0000
         8         0.0084      0.0294     -0.0134
         9        -0.0001     -0.0002      1.1515
        10         0.0000     -0.0001     -0.0801
        11         0.0000      0.0001     -0.7616
        12        -0.0002     -0.0001      0.6759
 Ground to excited state transition velocity quadrupole moments (Au):
       state          XX          YY          ZZ          XY          XZ          YZ
         1         0.0000      0.0000      0.0000      0.0000      0.0000      0.0000
         2         0.0000      0.0000      0.0000      0.0000      0.0000      0.0000
         3         0.0000      0.0000      0.0000      0.0000      0.0000      0.0000
         4         0.0000      0.0000      0.0000      0.0000      0.0000      0.0000
         5         0.0000      0.0000      0.0000      0.0000      0.0000      0.0000
         6        -0.0001      0.0001      0.0000     -0.0002      0.0374     -0.0078
         7         0.0000      0.0000      0.0000      0.0000      0.0000      0.0000
         8        -0.0034      0.0024     -0.0001     -0.0025     -0.0020      0.0004
         9         0.3269     -0.2087      0.0114      0.2210      0.0000      0.0000
        10        -1.2213      0.1666     -0.0183      0.1520      0.0000      0.0000
        11         0.2808     -0.1410      0.0248     -0.3677     -0.0001     -0.0001
        12         0.0721      0.0488      0.0031      0.3857      0.0001      0.0000
 <0|del|b> * <b|rxdel|0> + <0|del|b> * <b|delr+rdel|0>
 Rotatory Strengths (R) in cgs (10**-40 erg-esu-cm/Gauss)
       state          XX          YY          ZZ    R(velocity)    E-M Angle
         1         0.0000      0.0000      0.0000      0.0000       90.00
         2         0.0000      0.0000      0.0000      0.0000       90.00
         3         0.0000      0.0000      0.0000      0.0000       90.00
         4         0.0000      0.0000      0.0000      0.0000       90.00
         5         0.0000      0.0000      0.0000      0.0000       90.00
         6         0.0346     -0.0327      0.0001      0.0007       90.00
         7         0.0000      0.0000      0.0000      0.0000       90.00
         8         0.0122      0.0233      0.0404      0.0253       90.00
         9        -0.1402     -0.0722      0.0323     -0.0600       90.00
        10        -0.0089      0.0172     -0.0047      0.0012       90.00
        11         0.0109      0.0330     -0.0137      0.0101       90.00
        12         0.2849      0.0796     -0.0275      0.1123       90.00
 1/2[<0|r|b>*<b|rxdel|0> + (<0|rxdel|b>*<b|r|0>)*]
 Rotatory Strengths (R) in cgs (10**-40 erg-esu-cm/Gauss)
       state          XX          YY          ZZ     R(length)
         1         0.0000      0.0000      0.0000      0.0000
         2         0.0000      0.0000      0.0000      0.0000
         3         0.0000      0.0000      0.0000      0.0000
         4         0.0000      0.0000      0.0000      0.0000
         5         0.0000      0.0000      0.0000      0.0000
         6        -0.0577      0.0308      0.0010     -0.0086
         7         0.0000      0.0000      0.0000      0.0000
         8         0.0517      0.0319     -0.0031      0.0268
         9         0.0489      0.0244     -0.0211      0.0174
        10         0.0194     -0.0163     -0.0023      0.0003
        11         0.0149     -0.0207     -0.0330     -0.0129
        12        -0.0405     -0.0824     -0.0291     -0.0507
  1/2[<0|del|b>*<b|r|0> + (<0|r|b>*<b|del|0>)*] (Au)
       state          X           Y           Z        Dip. S.   Osc.(frdel)
         1         0.0000      0.0000      0.0000      0.0000      0.0000
         2         0.0000      0.0000      0.0000      0.0000      0.0000
         3         0.0000      0.0000      0.0000      0.0000      0.0000
         4         0.0000      0.0000      0.0000      0.0000      0.0000
         5         0.0000      0.0000      0.0000      0.0000      0.0000
         6         0.0000      0.0000      0.0000      0.0000      0.0000
         7         0.0000      0.0000      0.0000      0.0000      0.0000
         8         0.0000      0.0000      0.0000      0.0000      0.0000
         9        -0.0584     -0.0022      0.0000      0.0606      0.0404
        10        -0.1633     -0.0040      0.0000      0.1673      0.1115
        11        -0.0701     -0.0072      0.0000      0.0773      0.0516
        12        -0.0126     -0.2320      0.0000      0.2446      0.1631

 Excitation energies and oscillator strengths:
 
 Excited State   1:      Triplet-A      2.6198 eV  473.27 nm  f=0.0000  <S**2>=2.000
      66 -> 73         0.15226
      70 -> 72         0.68062
 This state for optimization and/or second-order correction.
 Total Energy, E(TD-HF/TD-KS) =  -3262.45734726    
 Copying the excited state density for this state as the 1-particle RhoCI density.
 
 Excited State   2:      Triplet-A      2.7249 eV  455.01 nm  f=0.0000  <S**2>=2.000
      64 -> 72        -0.14884
      67 -> 72        -0.11364
      71 -> 72         0.64131
      71 -> 74         0.11909
 
 Excited State   3:      Triplet-A      2.8585 eV  433.75 nm  f=0.0000  <S**2>=2.000
      64 -> 72        -0.10599
      67 -> 72        -0.38654
      68 -> 72         0.48151
      68 -> 74        -0.13041
      69 -> 73        -0.18847
      69 -> 75         0.10822
 
 Excited State   4:      Triplet-A      2.8866 eV  429.51 nm  f=0.0000  <S**2>=2.000
      66 -> 72         0.65974
      70 -> 73         0.21086
 
 Excited State   5:      Triplet-A      2.9922 eV  414.36 nm  f=0.0000  <S**2>=2.000
      67 -> 72        -0.21292
      69 -> 72         0.64320
 
 Excited State   6:      Singlet-A      3.0258 eV  409.76 nm  f=0.0000  <S**2>=0.000
      66 -> 73         0.11091
      70 -> 72         0.69383
 
 Excited State   7:      Triplet-A      3.2487 eV  381.64 nm  f=0.0000  <S**2>=2.000
      67 -> 72         0.42698
      68 -> 72         0.44697
      69 -> 72         0.22755
      71 -> 72         0.16977
 
 Excited State   8:      Singlet-A      3.3092 eV  374.66 nm  f=0.0000  <S**2>=0.000
      66 -> 72         0.67792
      70 -> 73         0.16664
 
 Excited State   9:      Singlet-A      3.3177 eV  373.70 nm  f=0.0408  <S**2>=0.000
      68 -> 72        -0.14646
      71 -> 72         0.67848
 
 Excited State  10:      Singlet-A      3.6719 eV  337.66 nm  f=0.1092  <S**2>=0.000
      67 -> 72         0.10856
      68 -> 72         0.27724
      69 -> 72         0.62325
 
 Excited State  11:      Singlet-A      3.7502 eV  330.61 nm  f=0.0515  <S**2>=0.000
      67 -> 72         0.20371
      68 -> 72         0.57171
      69 -> 72        -0.28637
      71 -> 72         0.14155
      71 -> 73        -0.12841
 
 Excited State  12:      Singlet-A      4.1878 eV  296.06 nm  f=0.1716  <S**2>=0.000
      67 -> 72         0.62801
      68 -> 72        -0.23176
      71 -> 72        -0.10436
      71 -> 73        -0.10855
 SavETr:  write IOETrn=   770 NScale= 10 NData=  16 NLR=1 NState=   12 LETran=     214.
 Leave Link  914 at Sat Jan 11 20:53:12 2020, MaxMem=   134217728 cpu:      9749.0
 (Enter E:\Gaussian\G09W\l601.exe)
 Copying SCF densities to generalized density rwf, IOpCl= 0 IROHF=0.

 **********************************************************************

            Population analysis using the SCF density.

 **********************************************************************

 Orbital symmetries:
       Occupied  (A) (A) (A) (A) (A) (A) (A) (A) (A) (A) (A) (A)
                 (A) (A) (A) (A) (A) (A) (A) (A) (A) (A) (A) (A)
                 (A) (A) (A) (A) (A) (A) (A) (A) (A) (A) (A) (A)
                 (A) (A) (A) (A) (A) (A) (A) (A) (A) (A) (A) (A)
                 (A) (A) (A) (A) (A) (A) (A) (A) (A) (A) (A) (A)
                 (A) (A) (A) (A) (A) (A) (A) (A) (A) (A) (A)
       Virtual   (A) (A) (A) (A) (A) (A) (A) (A) (A) (A) (A) (A)
                 (A) (A) (A) (A) (A) (A) (A) (A) (A) (A) (A) (A)
                 (A) (A) (A) (A) (A) (A) (A) (A) (A) (A) (A) (A)
                 (A) (A) (A) (A) (A) (A) (A) (A) (A) (A) (A) (A)
                 (A) (A) (A) (A) (A) (A) (A) (A) (A) (A) (A) (A)
                 (A) (A) (A) (A) (A) (A) (A) (A) (A) (A) (A) (A)
                 (A) (A) (A) (A) (A) (A) (A) (A) (A) (A) (A) (A)
                 (A) (A) (A) (A) (A) (A) (A) (A) (A) (A) (A) (A)
                 (A) (A) (A) (A) (A) (A) (A) (A) (A) (A) (A) (A)
                 (A) (A) (A) (A) (A) (A) (A) (A) (A) (A) (A) (A)
                 (A) (A) (A) (A) (A) (A) (A) (A) (A) (A) (A) (A)
                 (A) (A) (A) (A) (A) (A) (A) (A) (A) (A) (A) (A)
                 (A) (A) (A) (A) (A) (A) (A) (A) (A) (A) (A) (A)
                 (A) (A) (A) (A) (A) (A) (A) (A) (A) (A) (A) (A)
                 (A) (A) (A) (A) (A) (A) (A) (A) (A) (A) (A) (A)
                 (A) (A) (A) (A) (A) (A) (A) (A) (A) (A) (A) (A)
                 (A) (A) (A) (A) (A) (A) (A) (A) (A) (A) (A) (A)
                 (A) (A) (A) (A) (A) (A) (A) (A) (A) (A) (A) (A)
                 (A) (A) (A) (A) (A) (A) (A) (A) (A) (A) (A) (A)
                 (A) (A) (A) (A) (A) (A) (A) (A) (A) (A) (A) (A)
                 (A) (A) (A) (A) (A) (A) (A) (A) (A) (A) (A) (A)
                 (A) (A) (A) (A) (A) (A) (A) (A) (A) (A) (A) (A)
                 (A) (A) (A) (A) (A) (A) (A) (A) (A) (A) (A) (A)
                 (A) (A) (A) (A) (A) (A) (A) (A) (A) (A) (A) (A)
                 (A) (A) (A) (A) (A) (A) (A) (A) (A) (A) (A) (A)
                 (A) (A) (A) (A) (A) (A) (A) (A) (A) (A) (A) (A)
                 (A) (A) (A) (A) (A) (A) (A) (A) (A) (A) (A) (A)
                 (A) (A) (A) (A) (A) (A) (A) (A) (A) (A) (A) (A)
                 (A) (A) (A) (A) (A) (A) (A) (A)
 The electronic state is 1-A.
 Alpha  occ. eigenvalues -- -482.84673 -62.49957 -56.31993 -56.31610 -56.31589
 Alpha  occ. eigenvalues --  -19.13679 -19.13505 -10.28916 -10.28756 -10.25898
 Alpha  occ. eigenvalues --  -10.21974 -10.21609 -10.21293 -10.21265 -10.21241
 Alpha  occ. eigenvalues --  -10.21202 -10.20875 -10.20196 -10.20159 -10.20113
 Alpha  occ. eigenvalues --  -10.20095  -8.70926  -6.54069  -6.52790  -6.52732
 Alpha  occ. eigenvalues --   -2.65163  -2.64802  -2.64761  -2.63744  -2.63743
 Alpha  occ. eigenvalues --   -1.07059  -1.06782  -0.90971  -0.89205  -0.84195
 Alpha  occ. eigenvalues --   -0.80602  -0.78817  -0.78298  -0.75974  -0.69668
 Alpha  occ. eigenvalues --   -0.67367  -0.64643  -0.62663  -0.59424  -0.56917
 Alpha  occ. eigenvalues --   -0.55757  -0.51420  -0.49935  -0.49547  -0.48198
 Alpha  occ. eigenvalues --   -0.46522  -0.46302  -0.46206  -0.45535  -0.45128
 Alpha  occ. eigenvalues --   -0.44506  -0.42408  -0.40901  -0.40411  -0.38751
 Alpha  occ. eigenvalues --   -0.38234  -0.38027  -0.37230  -0.33444  -0.30942
 Alpha  occ. eigenvalues --   -0.29359  -0.29355  -0.28635  -0.28180  -0.28130
 Alpha  occ. eigenvalues --   -0.27004
 Alpha virt. eigenvalues --   -0.12491  -0.08121  -0.04414  -0.03341  -0.02659
 Alpha virt. eigenvalues --   -0.00172   0.00893   0.01895   0.02328   0.02500
 Alpha virt. eigenvalues --    0.03008   0.03097   0.04032   0.04411   0.04980
 Alpha virt. eigenvalues --    0.05229   0.05340   0.05686   0.06271   0.07448
 Alpha virt. eigenvalues --    0.07488   0.07967   0.08768   0.09052   0.09298
 Alpha virt. eigenvalues --    0.10326   0.10786   0.11482   0.11716   0.12281
 Alpha virt. eigenvalues --    0.12679   0.12942   0.13557   0.14200   0.14395
 Alpha virt. eigenvalues --    0.14768   0.15721   0.16331   0.16654   0.16772
 Alpha virt. eigenvalues --    0.17364   0.17481   0.17858   0.18018   0.18357
 Alpha virt. eigenvalues --    0.19023   0.19133   0.19315   0.19594   0.19868
 Alpha virt. eigenvalues --    0.19878   0.20298   0.21263   0.21478   0.22252
 Alpha virt. eigenvalues --    0.22551   0.23097   0.23632   0.23879   0.24067
 Alpha virt. eigenvalues --    0.24659   0.25274   0.25367   0.25622   0.26097
 Alpha virt. eigenvalues --    0.26782   0.27385   0.27511   0.28536   0.29094
 Alpha virt. eigenvalues --    0.29421   0.29923   0.30011   0.30338   0.30712
 Alpha virt. eigenvalues --    0.31234   0.32169   0.32679   0.33028   0.33516
 Alpha virt. eigenvalues --    0.34264   0.34890   0.35552   0.36167   0.36633
 Alpha virt. eigenvalues --    0.37867   0.39239   0.40250   0.41078   0.42934
 Alpha virt. eigenvalues --    0.44286   0.44752   0.46184   0.46746   0.48783
 Alpha virt. eigenvalues --    0.49683   0.50849   0.51757   0.51903   0.52580
 Alpha virt. eigenvalues --    0.52899   0.53390   0.53547   0.54581   0.55307
 Alpha virt. eigenvalues --    0.55403   0.57911   0.58618   0.58833   0.58871
 Alpha virt. eigenvalues --    0.59677   0.61039   0.61209   0.62007   0.62312
 Alpha virt. eigenvalues --    0.63070   0.63226   0.63568   0.63636   0.65180
 Alpha virt. eigenvalues --    0.65485   0.66312   0.66561   0.67685   0.68721
 Alpha virt. eigenvalues --    0.69656   0.70364   0.70432   0.71551   0.72102
 Alpha virt. eigenvalues --    0.72485   0.74412   0.74828   0.75509   0.76839
 Alpha virt. eigenvalues --    0.77230   0.78406   0.79691   0.82356   0.83554
 Alpha virt. eigenvalues --    0.84283   0.84919   0.85932   0.87097   0.88230
 Alpha virt. eigenvalues --    0.89647   0.90621   0.91401   0.91866   0.91977
 Alpha virt. eigenvalues --    0.93086   0.93286   0.94769   0.95364   0.96627
 Alpha virt. eigenvalues --    0.96650   0.98600   0.99149   0.99296   1.01806
 Alpha virt. eigenvalues --    1.03268   1.05795   1.06246   1.08640   1.09214
 Alpha virt. eigenvalues --    1.10060   1.10386   1.12946   1.13936   1.14555
 Alpha virt. eigenvalues --    1.16949   1.17647   1.18602   1.18882   1.18937
 Alpha virt. eigenvalues --    1.19249   1.21341   1.21835   1.23234   1.25186
 Alpha virt. eigenvalues --    1.26497   1.30693   1.31918   1.33531   1.34211
 Alpha virt. eigenvalues --    1.34572   1.40144   1.44413   1.47486   1.48105
 Alpha virt. eigenvalues --    1.48770   1.50234   1.51321   1.51351   1.53372
 Alpha virt. eigenvalues --    1.55055   1.55752   1.58911   1.62436   1.66137
 Alpha virt. eigenvalues --    1.69164   1.69819   1.73348   1.74273   1.76829
 Alpha virt. eigenvalues --    1.78156   1.79621   1.81634   1.82141   1.83725
 Alpha virt. eigenvalues --    1.83937   1.85449   1.87759   1.89600   1.89782
 Alpha virt. eigenvalues --    1.90004   1.90513   1.90929   1.91341   1.92392
 Alpha virt. eigenvalues --    1.93165   1.96284   1.97534   1.99771   2.01821
 Alpha virt. eigenvalues --    2.02798   2.03083   2.07428   2.08617   2.14835
 Alpha virt. eigenvalues --    2.15526   2.22559   2.23612   2.25617   2.27320
 Alpha virt. eigenvalues --    2.29982   2.31736   2.32214   2.33113   2.34860
 Alpha virt. eigenvalues --    2.35264   2.37518   2.39335   2.42159   2.42254
 Alpha virt. eigenvalues --    2.49241   2.54470   2.56716   2.58573   2.58860
 Alpha virt. eigenvalues --    2.61854   2.65264   2.68558   2.71144   2.74227
 Alpha virt. eigenvalues --    2.74316   2.75176   2.79419   2.80887   2.82539
 Alpha virt. eigenvalues --    2.83994   2.84054   2.84612   2.85591   2.89388
 Alpha virt. eigenvalues --    2.91117   2.92659   2.95214   2.99277   2.99725
 Alpha virt. eigenvalues --    3.05595   3.05798   3.06496   3.14540   3.16116
 Alpha virt. eigenvalues --    3.17913   3.19737   3.21357   3.24651   3.27441
 Alpha virt. eigenvalues --    3.29350   3.31598   3.31720   3.31967   3.32892
 Alpha virt. eigenvalues --    3.34447   3.37060   3.39795   3.45104   3.48843
 Alpha virt. eigenvalues --    3.49539   3.51540   3.57041   3.60417   3.61373
 Alpha virt. eigenvalues --    3.65674   3.70358   3.80106   3.84663   3.93055
 Alpha virt. eigenvalues --    3.98273   4.02223   4.12691   4.17404   4.18160
 Alpha virt. eigenvalues --    4.20235   4.21867   4.37434   4.37528   4.55287
 Alpha virt. eigenvalues --    4.72992   4.77623   4.78362   5.03362   5.04700
 Alpha virt. eigenvalues --    5.21972   5.24585   5.69714   5.77872   6.74134
 Alpha virt. eigenvalues --    7.54363   7.67142   7.73674  23.29034  23.42911
 Alpha virt. eigenvalues --   23.83735  23.85028  23.85586  23.85974  23.88936
 Alpha virt. eigenvalues --   23.91531  24.00059  24.02569  24.03015  24.03976
 Alpha virt. eigenvalues --   24.10983  24.12218  47.99714  50.01796  50.06770
 Alpha virt. eigenvalues --  289.74129 289.86947 289.959611020.80616
          Condensed to atoms (all electrons):
               1          2          3          4          5          6
     1  C    6.462127   0.147277  -0.664654   0.096344  -0.360849   0.683872
     2  C    0.147277   9.008992  -1.160306  -0.127753   1.050066  -0.478728
     3  C   -0.664654  -1.160306  14.312294  -3.205989   0.095334   0.135715
     4  C    0.096344  -0.127753  -3.205989  15.011290  -0.562977  -0.615629
     5  C   -0.360849   1.050066   0.095334  -0.562977   8.348687   0.252267
     6  C    0.683872  -0.478728   0.135715  -0.615629   0.252267   6.470123
     7  H    0.347684  -0.062382   0.028288   0.013345  -0.014432   0.020409
     8  H   -0.005069   0.301460  -0.073863   0.030569  -0.017366  -0.017399
     9  H   -0.015912  -0.011435   0.011122  -0.084174   0.291549  -0.001198
    10  H    0.021108  -0.012350   0.025661   0.011848  -0.063020   0.352445
    11  C   -0.130361  -0.384579  -0.121233   0.206385  -1.696917   0.045093
    12  O   -0.002030  -0.002946  -0.300841  -0.089095   0.092945   0.050470
    13  C    0.189820  -1.917350   0.767737   0.456566  -0.743124  -0.004176
    14  C   -0.141800  -0.735254  -3.865464   0.954486   0.010349   0.018179
    15  C   -0.025031   0.290991   1.062806  -5.085258  -0.599688  -0.216933
    16  C   -0.050926   0.030407  -0.817793  -0.320499  -0.146854  -0.058380
    17  C   -0.069309  -0.082009  -0.307288  -0.922731   0.063138  -0.062642
    18  C   -0.004763  -0.035713  -0.128977   0.210030  -0.081467   0.001185
    19  H    0.000225  -0.000308   0.007140   0.032204   0.007512   0.000615
    20  C    0.000325  -0.078749   0.120592   0.071151  -0.069632  -0.001465
    21  H    0.000803   0.005161   0.016542   0.007175  -0.000454   0.000126
    22  H   -0.000016  -0.000152   0.000710   0.001517   0.000216   0.000009
    23  Br  -0.000166   0.000743  -0.003347  -0.020005  -0.003317  -0.000493
    24  O    0.050938   0.112253  -0.161146  -0.288135  -0.001674  -0.006079
               7          8          9         10         11         12
     1  C    0.347684  -0.005069  -0.015912   0.021108  -0.130361  -0.002030
     2  C   -0.062382   0.301460  -0.011435  -0.012350  -0.384579  -0.002946
     3  C    0.028288  -0.073863   0.011122   0.025661  -0.121233  -0.300841
     4  C    0.013345   0.030569  -0.084174   0.011848   0.206385  -0.089095
     5  C   -0.014432  -0.017366   0.291549  -0.063020  -1.696917   0.092945
     6  C    0.020409  -0.017399  -0.001198   0.352445   0.045093   0.050470
     7  H    0.424070  -0.004668  -0.000229  -0.005185   0.001701   0.000007
     8  H   -0.004668   0.415331   0.000073  -0.000220   0.007113   0.000005
     9  H   -0.000229   0.000073   0.415676  -0.004705   0.080415   0.008509
    10  H   -0.005185  -0.000220  -0.004705   0.423942  -0.012447   0.000028
    11  C    0.001701   0.007113   0.080415  -0.012447   9.251432   0.625380
    12  O    0.000007   0.000005   0.008509   0.000028   0.625380   8.224658
    13  C   -0.007520   0.061013   0.005474   0.003655   1.019728  -0.019493
    14  C    0.000992   0.005149   0.024364  -0.000299   0.057817  -0.173868
    15  C   -0.000593   0.016744   0.009456   0.000866  -0.155320  -0.312318
    16  C    0.000198  -0.000085   0.004684  -0.000415  -2.236833   0.060159
    17  C   -0.000463   0.006285   0.000130   0.000139  -0.606796  -0.009935
    18  C    0.000017   0.000038  -0.000081  -0.000008   0.241229   0.094733
    19  H    0.000000   0.000000  -0.000014   0.000000   0.117482   0.011327
    20  C   -0.000018   0.000289  -0.000174   0.000007   0.293622   0.009718
    21  H    0.000000  -0.000013   0.000000   0.000000   0.011202   0.000007
    22  H    0.000000   0.000000   0.000000   0.000000   0.002943   0.000007
    23  Br   0.000000   0.000001   0.000005   0.000000  -0.070022   0.001083
    24  O    0.000025   0.008318   0.000011   0.000005  -0.016701  -0.000076
              13         14         15         16         17         18
     1  C    0.189820  -0.141800  -0.025031  -0.050926  -0.069309  -0.004763
     2  C   -1.917350  -0.735254   0.290991   0.030407  -0.082009  -0.035713
     3  C    0.767737  -3.865464   1.062806  -0.817793  -0.307288  -0.128977
     4  C    0.456566   0.954486  -5.085258  -0.320499  -0.922731   0.210030
     5  C   -0.743124   0.010349  -0.599688  -0.146854   0.063138  -0.081467
     6  C   -0.004176   0.018179  -0.216933  -0.058380  -0.062642   0.001185
     7  H   -0.007520   0.000992  -0.000593   0.000198  -0.000463   0.000017
     8  H    0.061013   0.005149   0.016744  -0.000085   0.006285   0.000038
     9  H    0.005474   0.024364   0.009456   0.004684   0.000130  -0.000081
    10  H    0.003655  -0.000299   0.000866  -0.000415   0.000139  -0.000008
    11  C    1.019728   0.057817  -0.155320  -2.236833  -0.606796   0.241229
    12  O   -0.019493  -0.173868  -0.312318   0.060159  -0.009935   0.094733
    13  C    8.593516   0.321348  -0.183064  -0.902085  -2.058196  -0.120125
    14  C    0.321348  14.702913  -3.836996   0.174221   0.510989  -1.999473
    15  C   -0.183064  -3.836996  15.644236   0.943951  -0.094447  -0.077242
    16  C   -0.902085   0.174221   0.943951   9.653755   0.699827   0.326242
    17  C   -2.058196   0.510989  -0.094447   0.699827   8.710682  -0.345272
    18  C   -0.120125  -1.999473  -0.077242   0.326242  -0.345272   7.490637
    19  H    0.012122  -0.030948  -0.014421   0.248164  -0.018003  -0.046544
    20  C    0.369145  -0.028782  -1.740785  -1.685788   0.157806   0.619881
    21  H    0.091257   0.048579  -0.094859  -0.030282   0.279521  -0.037174
    22  H   -0.004503   0.021484   0.025334   0.007630  -0.002047  -0.030487
    23  Br  -0.007139  -0.016158   0.073253   0.112980   0.059278  -0.016262
    24  O    0.559124  -0.274180  -0.094248  -0.009623   0.088862  -0.003895
              19         20         21         22         23         24
     1  C    0.000225   0.000325   0.000803  -0.000016  -0.000166   0.050938
     2  C   -0.000308  -0.078749   0.005161  -0.000152   0.000743   0.112253
     3  C    0.007140   0.120592   0.016542   0.000710  -0.003347  -0.161146
     4  C    0.032204   0.071151   0.007175   0.001517  -0.020005  -0.288135
     5  C    0.007512  -0.069632  -0.000454   0.000216  -0.003317  -0.001674
     6  C    0.000615  -0.001465   0.000126   0.000009  -0.000493  -0.006079
     7  H    0.000000  -0.000018   0.000000   0.000000   0.000000   0.000025
     8  H    0.000000   0.000289  -0.000013   0.000000   0.000001   0.008318
     9  H   -0.000014  -0.000174   0.000000   0.000000   0.000005   0.000011
    10  H    0.000000   0.000007   0.000000   0.000000   0.000000   0.000005
    11  C    0.117482   0.293622   0.011202   0.002943  -0.070022  -0.016701
    12  O    0.011327   0.009718   0.000007   0.000007   0.001083  -0.000076
    13  C    0.012122   0.369145   0.091257  -0.004503  -0.007139   0.559124
    14  C   -0.030948  -0.028782   0.048579   0.021484  -0.016158  -0.274180
    15  C   -0.014421  -1.740785  -0.094859   0.025334   0.073253  -0.094248
    16  C    0.248164  -1.685788  -0.030282   0.007630   0.112980  -0.009623
    17  C   -0.018003   0.157806   0.279521  -0.002047   0.059278   0.088862
    18  C   -0.046544   0.619881  -0.037174  -0.030487  -0.016262  -0.003895
    19  H    0.399642   0.000420   0.000063  -0.000137  -0.012141  -0.000001
    20  C    0.000420   8.007013   0.017403   0.307799   0.052982   0.068345
    21  H    0.000063   0.017403   0.407774  -0.004535   0.000199   0.008239
    22  H   -0.000137   0.307799  -0.004535   0.406458  -0.010112   0.000050
    23  Br  -0.012141   0.052982   0.000199  -0.010112  34.997730  -0.000024
    24  O   -0.000001   0.068345   0.008239   0.000050  -0.000024   8.234951
 Mulliken charges:
               1
     1  C   -0.529640
     2  C    0.142664
     3  C    0.226960
     4  C    0.219337
     5  C    0.149704
     6  C   -0.567387
     7  H    0.258754
     8  H    0.266296
     9  H    0.266454
    10  H    0.258945
    11  C   -0.530333
    12  O   -0.268434
    13  C   -0.483728
    14  C    0.252351
    15  C    0.463564
    16  C   -0.002656
    17  C    0.002481
    18  C   -0.056512
    19  H    0.285602
    20  C   -0.491108
    21  H    0.273266
    22  H    0.277831
    23  Br  -0.139070
    24  O   -0.275341
 Sum of Mulliken charges =   0.00000
 Mulliken charges with hydrogens summed into heavy atoms:
               1
     1  C   -0.270885
     2  C    0.408960
     3  C    0.226960
     4  C    0.219337
     5  C    0.416159
     6  C   -0.308442
    11  C   -0.530333
    12  O   -0.268434
    13  C   -0.483728
    14  C    0.252351
    15  C    0.463564
    16  C    0.282946
    17  C    0.275747
    18  C   -0.056512
    20  C   -0.213277
    23  Br  -0.139070
    24  O   -0.275341
 Electronic spatial extent (au):  <R**2>=           6224.7366
 Charge=              0.0000 electrons
 Dipole moment (field-independent basis, Debye):
    X=              2.2496    Y=              0.4938    Z=              0.0002  Tot=              2.3032
 Quadrupole moment (field-independent basis, Debye-Ang):
   XX=            -85.3621   YY=           -118.8628   ZZ=           -112.1342
   XY=            -10.5906   XZ=              0.0013   YZ=              0.0037
 Traceless Quadrupole moment (field-independent basis, Debye-Ang):
   XX=             20.0910   YY=            -13.4097   ZZ=             -6.6812
   XY=            -10.5906   XZ=              0.0013   YZ=              0.0037
 Octapole moment (field-independent basis, Debye-Ang**2):
  XXX=             17.2497  YYY=            -15.0291  ZZZ=             -0.0060  XYY=            -64.4790
  XXY=            -24.8494  XXZ=             -0.0031  XZZ=            -49.8935  YZZ=             -4.3592
  YYZ=             -0.0024  XYZ=              0.0061
 Hexadecapole moment (field-independent basis, Debye-Ang**3):
 XXXX=          -5052.0307 YYYY=          -1477.9969 ZZZZ=           -126.9726 XXXY=            -29.3227
 XXXZ=             -0.0911 YYYX=            -55.9919 YYYZ=              0.0620 ZZZX=             -0.0926
 ZZZY=              0.0382 XXYY=          -1144.2727 XXZZ=          -1095.7403 YYZZ=           -254.8095
 XXYZ=              0.0150 YYXZ=             -0.0176 ZZXY=             28.7884
 N-N= 1.372337970217D+03 E-N=-1.050034931208D+04  KE= 3.256664915611D+03
 Leave Link  601 at Sat Jan 11 20:53:24 2020, MaxMem=   134217728 cpu:         0.0
 (Enter E:\Gaussian\G09W\l9999.exe)
 1|1|UNPC-DESKTOP-K4OTQA5|SP|RB3LYP TD-FC|6-311+G(d)|C14H7Br1O2|������|
 11-Jan-2020|0||#p td=(50-50,nstates=6) b3lyp/6-311+g(d) scrf=(solvent=
 acetonitrile) guess=save geom=connectivity empiricaldispersion=gd3bj||
 2-BrAQ excited state||0,1|C,0,-5.088092,0.054699,0.000006|C,0,-4.05282
 4,0.982846,-0.000028|C,0,-2.722773,0.555482,-0.000138|C,0,-2.43487,-0.
 822412,-0.000168|C,0,-3.481869,-1.747703,-0.000154|C,0,-4.802232,-1.31
 2606,-0.000066|H,0,-6.117669,0.393785,0.00008|H,0,-4.260791,2.045378,0
 .|H,0,-3.246666,-2.804535,-0.000186|H,0,-5.609594,-2.035866,-0.000043|
 C,0,-1.034438,-1.316931,-0.000153|O,0,-0.777224,-2.512795,-0.000411|C,
 0,-1.636845,1.570647,-0.000294|C,0,0.053639,-0.298009,-0.000116|C,0,-0
 .234613,1.076981,-0.000089|C,0,1.379131,-0.735985,-0.000051|C,0,0.8149
 65,1.999274,0.000066|C,0,2.402196,0.201347,0.00008|H,0,1.586073,-1.797
 609,-0.00008|C,0,2.13585,1.571217,0.000151|H,0,0.586164,3.057406,0.000
 091|H,0,2.945958,2.289153,0.000261|Br,0,4.217896,-0.396415,0.000193|O,
 0,-1.884424,2.769513,0.000267||Version=IA32W-G09RevD.01|State=1-A|HF=-
 3262.5536214|RMSD=8.378e-009|PG=C01 [X(C14H7Br1O2)]||@


 BE NOT THE FIRST BY WHOM THE NEW ARE TRIED,
 NOR YET THE THE LAST TO LAY THE OLD ASIDE.

                          -- ALEXANDER POPE
 Job cpu time:       0 days  3 hours 13 minutes 33.0 seconds.
 File lengths (MBytes):  RWF=    643 Int=      0 D2E=      0 Chk=     71 Scr=      1
 Normal termination of Gaussian 09 at Sat Jan 11 20:53:27 2020.
