# Supplementary material for: 2-Bromoanthraquinone as a highly efficient photocatalyst for the oxidation of sec-aromatic alcohols: experimental and DFT study
Source: Royal Society of Chemistry journal article supplement (doi:10.1039/d0ra06414a), 2020-01-01
Supplement: d0ra06414a2.out [file d0ra06414a2.out]

 Entering Link 1 = C:\software\gaussian\G09W\l1.exe PID=      6504.
  
 Copyright (c) 1988,1990,1992,1993,1995,1998,2003,2009,2013,
            Gaussian, Inc.  All Rights Reserved.
  
 This is part of the Gaussian(R) 09 program.  It is based on
 the Gaussian(R) 03 system (copyright 2003, Gaussian, Inc.),
 the Gaussian(R) 98 system (copyright 1998, Gaussian, Inc.),
 the Gaussian(R) 94 system (copyright 1995, Gaussian, Inc.),
 the Gaussian 92(TM) system (copyright 1992, Gaussian, Inc.),
 the Gaussian 90(TM) system (copyright 1990, Gaussian, Inc.),
 the Gaussian 88(TM) system (copyright 1988, Gaussian, Inc.),
 the Gaussian 86(TM) system (copyright 1986, Carnegie Mellon
 University), and the Gaussian 82(TM) system (copyright 1983,
 Carnegie Mellon University). Gaussian is a federally registered
 trademark of Gaussian, Inc.
  
 This software contains proprietary and confidential information,
 including trade secrets, belonging to Gaussian, Inc.
  
 This software is provided under written license and may be
 used, copied, transmitted, or stored only in accord with that
 written license.
  
 The following legend is applicable only to US Government
 contracts under FAR:
  
                    RESTRICTED RIGHTS LEGEND
  
 Use, reproduction and disclosure by the US Government is
 subject to restrictions as set forth in subparagraphs (a)
 and (c) of the Commercial Computer Software - Restricted
 Rights clause in FAR 52.227-19.
  
 Gaussian, Inc.
 340 Quinnipiac St., Bldg. 40, Wallingford CT 06492
  
  
 ---------------------------------------------------------------
 Warning -- This program may not be used in any manner that
 competes with the business of Gaussian, Inc. or will provide
 assistance to any competitor of Gaussian, Inc.  The licensee
 of this program is prohibited from giving any competitor of
 Gaussian, Inc. access to this program.  By using this program,
 the user acknowledges that Gaussian, Inc. is engaged in the
 business of creating and licensing software in the field of
 computational chemistry and represents and warrants to the
 licensee that it is not a competitor of Gaussian, Inc. and that
 it will not use this program in any manner prohibited above.
 ---------------------------------------------------------------
  

 Cite this work as:
 Gaussian 09, Revision D.01,
 M. J. Frisch, G. W. Trucks, H. B. Schlegel, G. E. Scuseria, 
 M. A. Robb, J. R. Cheeseman, G. Scalmani, V. Barone, B. Mennucci, 
 G. A. Petersson, H. Nakatsuji, M. Caricato, X. Li, H. P. Hratchian, 
 A. F. Izmaylov, J. Bloino, G. Zheng, J. L. Sonnenberg, M. Hada, 
 M. Ehara, K. Toyota, R. Fukuda, J. Hasegawa, M. Ishida, T. Nakajima, 
 Y. Honda, O. Kitao, H. Nakai, T. Vreven, J. A. Montgomery, Jr., 
 J. E. Peralta, F. Ogliaro, M. Bearpark, J. J. Heyd, E. Brothers, 
 K. N. Kudin, V. N. Staroverov, T. Keith, R. Kobayashi, J. Normand, 
 K. Raghavachari, A. Rendell, J. C. Burant, S. S. Iyengar, J. Tomasi, 
 M. Cossi, N. Rega, J. M. Millam, M. Klene, J. E. Knox, J. B. Cross, 
 V. Bakken, C. Adamo, J. Jaramillo, R. Gomperts, R. E. Stratmann, 
 O. Yazyev, A. J. Austin, R. Cammi, C. Pomelli, J. W. Ochterski, 
 R. L. Martin, K. Morokuma, V. G. Zakrzewski, G. A. Voth, 
 P. Salvador, J. J. Dannenberg, S. Dapprich, A. D. Daniels, 
 O. Farkas, J. B. Foresman, J. V. Ortiz, J. Cioslowski, 
 and D. J. Fox, Gaussian, Inc., Wallingford CT, 2013.
 
 ******************************************
 Gaussian 09:  IA32W-G09RevD.01 24-Apr-2013
                21-Jul-2020 
 ******************************************
 %nprocshared=4
 Will use up to    4 processors via shared memory.
 %mem=1500MB
 %chk=C:\Users\Shengfu Liao\Desktop\suppliment\HS2 energy.chk
 ----------------------------------------------------------------------
 # um062x/gen scrf=(solvent=acetonitrile) geom=connectivity empiricaldi
 spersion=gd3
 ----------------------------------------------------------------------
 1/38=1,57=2/1;
 2/12=2,17=6,18=5,40=1/2;
 3/5=7,11=2,16=1,25=1,30=1,70=2201,72=2,74=-55,116=2,124=31/1,2,3;
 4//1;
 5/5=2,38=5,53=2/2;
 6/7=2,8=2,9=2,10=2,28=1/1;
 99/5=1,9=1/99;
 ----------
 HS2 energy
 ----------
 Symbolic Z-matrix:
 Charge =  0 Multiplicity = 2
 C                    -3.09598  -0.60372   0. 
 C                    -4.11285   0.32937  -0.00006 
 C                    -5.46583  -0.08526  -0.00009 
 C                    -5.75902  -1.47603  -0.00006 
 C                    -4.70658  -2.40201  0. 
 C                    -3.38946  -1.97877   0.00003 
 H                    -2.0634   -0.27273   0.00003 
 H                    -3.88582   1.38723  -0.00008 
 H                    -4.9557   -3.45597   0.00001 
 H                    -2.58423  -2.70453   0.00007 
 C                    -7.14544  -1.95958  -0.0001 
 O                    -7.41961  -3.16734  -0.00005 
 C                    -6.52788   0.86544  -0.00014 
 C                    -8.20203  -0.93279  -0.00012 
 C                    -7.89212   0.45838  -0.00015 
 C                    -9.53743  -1.35316  -0.00012 
 C                    -8.96825   1.38135  -0.00016 
 C                    -10.55419  -0.42067  -0.00014 
 H                    -9.73878  -2.41613  -0.0001 
 C                    -10.27841   0.95621  -0.00015 
 H                    -8.79443   2.45187  -0.00015 
 H                    -11.08537   1.67744  -0.00015 
 Br                   -12.37803  -1.00187  -0.00012 
 O                    -6.15255   2.15984  -0.00004 
 H                    -6.90874   2.75839  -0.00002 
 
                          Input orientation:                          
 ---------------------------------------------------------------------
 Center     Atomic      Atomic             Coordinates (Angstroms)
 Number     Number       Type             X           Y           Z
 ---------------------------------------------------------------------
      1          6           0       -3.095975   -0.603715    0.000000
      2          6           0       -4.112848    0.329367   -0.000056
      3          6           0       -5.465827   -0.085258   -0.000090
      4          6           0       -5.759020   -1.476032   -0.000060
      5          6           0       -4.706576   -2.402011   -0.000004
      6          6           0       -3.389459   -1.978767    0.000025
      7          1           0       -2.063396   -0.272725    0.000025
      8          1           0       -3.885816    1.387234   -0.000075
      9          1           0       -4.955695   -3.455965    0.000013
     10          1           0       -2.584230   -2.704527    0.000068
     11          6           0       -7.145435   -1.959579   -0.000097
     12          8           0       -7.419607   -3.167335   -0.000045
     13          6           0       -6.527875    0.865438   -0.000142
     14          6           0       -8.202033   -0.932789   -0.000123
     15          6           0       -7.892124    0.458377   -0.000153
     16          6           0       -9.537425   -1.353161   -0.000118
     17          6           0       -8.968254    1.381355   -0.000159
     18          6           0      -10.554186   -0.420668   -0.000135
     19          1           0       -9.738782   -2.416131   -0.000098
     20          6           0      -10.278410    0.956211   -0.000153
     21          1           0       -8.794428    2.451866   -0.000153
     22          1           0      -11.085373    1.677440   -0.000154
     23         35           0      -12.378034   -1.001870   -0.000120
     24          8           0       -6.152553    2.159840   -0.000038
     25          1           0       -6.908735    2.758392   -0.000018
 ---------------------------------------------------------------------
                    Distance matrix (angstroms):
                    1          2          3          4          5
     1  C    0.000000
     2  C    1.380099   0.000000
     3  C    2.425901   1.415085   0.000000
     4  C    2.802275   2.443225   1.421342   0.000000
     5  C    2.414105   2.795163   2.437992   1.401812   0.000000
     6  C    1.406023   2.418837   2.810103   2.422305   1.383450
     7  H    1.084331   2.136064   3.407592   3.886590   3.394151
     8  H    2.141898   1.081955   2.159784   3.421576   3.877116
     9  H    3.404980   3.878032   3.409091   2.136695   1.082996
    10  H    2.162243   3.397232   3.894120   3.404187   2.143798
    11  C    4.270421   3.799455   2.516776   1.468320   2.478665
    12  O    5.026524   4.812648   3.649172   2.370244   2.818911
    13  C    3.733142   2.473808   1.425401   2.464472   3.740769
    14  C    5.116651   4.279541   2.864460   2.502684   3.791679
    15  C    4.912340   3.781477   2.486455   2.879596   4.281301
    16  C    6.484901   5.679519   4.264445   3.780402   4.943398
    17  C    6.198723   4.968063   3.797097   4.296957   5.698751
    18  C    7.460457   6.484858   5.099402   4.909930   6.174161
    19  H    6.885618   6.260103   4.867352   4.089290   5.032226
    20  C    7.349880   6.197345   4.923983   5.132318   6.505612
    21  H    6.465983   5.140252   4.185282   4.964079   6.345916
    22  H    8.308679   7.101648   5.889516   6.189864   7.571722
    23  Br   9.290595   8.371708   6.972717   6.635976   7.798183
    24  O    4.120668   2.740625   2.347777   3.657107   4.785534
    25  H    5.083395   3.703667   3.188782   4.387732   5.610638
                    6          7          8          9         10
     6  C    0.000000
     7  H    2.160792   0.000000
     8  H    3.402401   2.465092   0.000000
     9  H    2.152954   4.300978   4.959961   0.000000
    10  H    1.084030   2.486952   4.293790   2.487671   0.000000
    11  C    3.756025   5.354680   4.671860   2.652194   4.621638
    12  O    4.201760   6.088330   5.764701   2.480760   4.857475
    13  C    4.235464   4.607276   2.693092   4.598508   5.319491
    14  C    4.924930   6.174022   4.900228   4.111585   5.890566
    15  C    5.119928   5.874400   4.112576   4.893331   6.178811
    16  C    6.179714   7.551718   6.280959   5.041233   7.083298
    17  C    6.512555   7.100214   5.082441   6.284926   7.579591
    18  C    7.332188   8.492079   6.909100   6.368369   8.290730
    19  H    6.364369   7.969049   6.980172   4.894811   7.160362
    20  C    7.488107   8.306428   6.407108   6.913653   8.520646
    21  H    6.988862   7.261555   5.022740   7.045448   8.071861
    22  H    8.520267   9.230342   7.205404   7.995299   9.564051
    23  Br   9.041505  10.340378   8.821881   7.817525   9.940706
    24  O    4.976219   4.758001   2.394789   5.741928   6.032826
    25  H    5.901354   5.715329   3.319354   6.514031   6.967412
                   11         12         13         14         15
    11  C    0.000000
    12  O    1.238485   0.000000
    13  C    2.891730   4.130187   0.000000
    14  C    1.473329   2.367570   2.456914   0.000000
    15  C    2.530624   3.656372   1.423683   1.425267   0.000000
    16  C    2.467663   2.788616   3.738927   1.399994   2.447179
    17  C    3.805852   4.805090   2.494318   2.437695   1.417725
    18  C    3.740031   4.167705   4.226730   2.407258   2.803443
    19  H    2.633228   2.437802   4.591146   2.135861   3.416569
    20  C    4.279879   5.017608   3.751633   2.807074   2.437663
    21  H    4.709567   5.784942   2.766589   3.436106   2.188184
    22  H    5.361998   6.075334   4.629269   3.889337   3.418034
    23  Br   5.319521   5.410660   6.140945   4.176572   4.717596
    24  O    4.237385   5.475785   1.347718   3.710084   2.433328
    25  H    4.723905   5.947708   1.930888   3.911194   2.501424
                   16         17         18         19         20
    16  C    0.000000
    17  C    2.793123   0.000000
    18  C    1.379618   2.400514   0.000000
    19  H    1.081873   3.874869   2.155634   0.000000
    20  C    2.425337   1.377409   1.404225   3.415244   0.000000
    21  H    3.876890   1.084532   3.368709   4.958750   2.106938
    22  H    3.403041   2.137723   2.164305   4.309365   1.082294
    23  Br   2.862248   4.160091   1.914215   2.994292   2.870976
    24  O    4.878374   2.921337   5.102293   5.813824   4.297839
    25  H    4.880049   2.477468   4.836914   5.897869   3.821330
                   21         22         23         24         25
    21  H    0.000000
    22  H    2.418298   0.000000
    23  Br   4.977000   2.974840   0.000000
    24  O    2.657966   4.956352   6.982337   0.000000
    25  H    1.910444   4.314251   6.637228   0.964404   0.000000
 Stoichiometry    C14H8BrO2(2)
 Framework group  C1[X(C14H8BrO2)]
 Deg. of freedom    69
 Full point group                 C1      NOp   1
 Largest Abelian subgroup         C1      NOp   1
 Largest concise Abelian subgroup C1      NOp   1
                         Standard orientation:                         
 ---------------------------------------------------------------------
 Center     Atomic      Atomic             Coordinates (Angstroms)
 Number     Number       Type             X           Y           Z
 ---------------------------------------------------------------------
      1          6           0        5.055337    0.004867    0.000090
      2          6           0        4.038464    0.937949    0.000034
      3          6           0        2.685485    0.523324    0.000000
      4          6           0        2.392292   -0.867450    0.000030
      5          6           0        3.444736   -1.793429    0.000086
      6          6           0        4.761853   -1.370185    0.000115
      7          1           0        6.087916    0.335857    0.000115
      8          1           0        4.265496    1.995816    0.000015
      9          1           0        3.195617   -2.847383    0.000103
     10          1           0        5.567082   -2.095945    0.000158
     11          6           0        1.005877   -1.350997   -0.000007
     12          8           0        0.731705   -2.558753    0.000045
     13          6           0        1.623437    1.474020   -0.000052
     14          6           0       -0.050721   -0.324207   -0.000033
     15          6           0        0.259188    1.066959   -0.000063
     16          6           0       -1.386113   -0.744579   -0.000028
     17          6           0       -0.816942    1.989937   -0.000069
     18          6           0       -2.402874    0.187914   -0.000045
     19          1           0       -1.587470   -1.807549   -0.000008
     20          6           0       -2.127098    1.564793   -0.000063
     21          1           0       -0.643116    3.060448   -0.000063
     22          1           0       -2.934061    2.286022   -0.000064
     23         35           0       -4.226722   -0.393288   -0.000030
     24          8           0        1.998759    2.768422    0.000052
     25          1           0        1.242577    3.366974    0.000072
 ---------------------------------------------------------------------
 Rotational constants (GHZ):      0.9793007      0.1770357      0.1499314
 General basis read from cards:  (5D, 7F)
 There are   679 symmetry adapted cartesian basis functions of A   symmetry.
 There are   592 symmetry adapted basis functions of A   symmetry.
   592 basis functions,   994 primitive gaussians,   679 cartesian basis functions
    72 alpha electrons       71 beta electrons
       nuclear repulsion energy      1392.2514404428 Hartrees.
 NAtoms=   25 NActive=   25 NUniq=   25 SFac= 1.00D+00 NAtFMM=   60 NAOKFM=F Big=F
 Integral buffers will be    262144 words long.
 Raffenetti 2 integral format.
 Two-electron integral symmetry is turned on.
 Nuclear repulsion after empirical dispersion term =     1392.2502434269 Hartrees.
 ------------------------------------------------------------------------------
 Polarizable Continuum Model (PCM)
 =================================
 Model                : PCM (using non-symmetric T matrix).
 Atomic radii         : UFF (Universal Force Field).
 Polarization charges : Total charges.
 Charge compensation  : None.
 Solution method      : On-the-fly selection.
 Cavity type          : Scaled VdW (van der Waals Surface) (Alpha=1.100).
 Cavity algorithm     : GePol (No added spheres)
                        Default sphere list used, NSphG=   25.
                        Lebedev-Laikov grids with approx.  5.0 points / Ang**2.
                        Smoothing algorithm: Karplus/York (Gamma=1.0000).
                        Polarization charges: spherical gaussians, with
                                              point-specific exponents (IZeta= 3).
                        Self-potential: point-specific (ISelfS= 7).
                        Self-field    : sphere-specific E.n sum rule (ISelfD= 2).
 Solvent              : Acetonitrile, Eps=  35.688000 Eps(inf)=   1.806874
 ------------------------------------------------------------------------------
 One-electron integrals computed using PRISM.
 NBasis=   592 RedAO= T EigKep=  5.66D-06  NBF=   592
 NBsUse=   592 1.00D-06 EigRej= -1.00D+00 NBFU=   592
 ExpMin= 9.52D-02 ExpMax= 5.65D+05 ExpMxC= 5.46D+03 IAcc=2 IRadAn=         4 AccDes= 0.00D+00
 Harris functional with IExCor= 1009 and IRadAn=       4 diagonalized for initial guess.
 HarFok:  IExCor= 1009 AccDes= 0.00D+00 IRadAn=         4 IDoV= 1 UseB2=F ITyADJ=14
 ICtDFT=  3500011 ScaDFX=  1.000000  1.000000  1.000000  1.000000
 FoFCou: FMM=F IPFlag=           0 FMFlag=      100000 FMFlg1=           0
         NFxFlg=           0 DoJE=T BraDBF=F KetDBF=T FulRan=T
         wScrn=  0.000000 ICntrl=     500 IOpCl=  0 I1Cent=   200000004 NGrid=           0
         NMat0=    1 NMatS0=      1 NMatT0=    0 NMatD0=    1 NMtDS0=    0 NMtDT0=    0
 Petite list used in FoFCou.
 Initial guess <Sx>= 0.0000 <Sy>= 0.0000 <Sz>= 0.5000 <S**2>= 0.7500 S= 0.5000
 Requested convergence on RMS density matrix=1.00D-08 within 128 cycles.
 Requested convergence on MAX density matrix=1.00D-06.
 Requested convergence on             energy=1.00D-06.
 No special actions if energy rises.
 Inv3:  Mode=1 IEnd=    14454075.
 Iteration    1 A*A^-1 deviation from unit magnitude is 2.66D-15 for     65.
 Iteration    1 A*A^-1 deviation from orthogonality  is 3.07D-15 for   1080    866.
 Iteration    1 A^-1*A deviation from unit magnitude is 2.44D-15 for    465.
 Iteration    1 A^-1*A deviation from orthogonality  is 1.51D-12 for   1347    873.
 Error on total polarization charges =  0.01740
 SCF Done:  E(UM062X) =  -3262.94242751     A.U. after   17 cycles
            NFock= 17  Conv=0.75D-08     -V/T= 2.0021
 <Sx>= 0.0000 <Sy>= 0.0000 <Sz>= 0.5000 <S**2>= 0.7793 S= 0.5145
 <L.S>= 0.000000000000E+00
 Annihilation of the first spin contaminant:
 S**2 before annihilation     0.7793,   after     0.7506

 **********************************************************************

            Population analysis using the SCF density.

 **********************************************************************

 Orbital symmetries:
 Alpha Orbitals:
       Occupied  (A) (A) (A) (A) (A) (A) (A) (A) (A) (A) (A) (A)
                 (A) (A) (A) (A) (A) (A) (A) (A) (A) (A) (A) (A)
                 (A) (A) (A) (A) (A) (A) (A) (A) (A) (A) (A) (A)
                 (A) (A) (A) (A) (A) (A) (A) (A) (A) (A) (A) (A)
                 (A) (A) (A) (A) (A) (A) (A) (A) (A) (A) (A) (A)
                 (A) (A) (A) (A) (A) (A) (A) (A) (A) (A) (A) (A)
       Virtual   (A) (A) (A) (A) (A) (A) (A) (A) (A) (A) (A) (A)
                 (A) (A) (A) (A) (A) (A) (A) (A) (A) (A) (A) (A)
                 (A) (A) (A) (A) (A) (A) (A) (A) (A) (A) (A) (A)
                 (A) (A) (A) (A) (A) (A) (A) (A) (A) (A) (A) (A)
                 (A) (A) (A) (A) (A) (A) (A) (A) (A) (A) (A) (A)
                 (A) (A) (A) (A) (A) (A) (A) (A) (A) (A) (A) (A)
                 (A) (A) (A) (A) (A) (A) (A) (A) (A) (A) (A) (A)
                 (A) (A) (A) (A) (A) (A) (A) (A) (A) (A) (A) (A)
                 (A) (A) (A) (A) (A) (A) (A) (A) (A) (A) (A) (A)
                 (A) (A) (A) (A) (A) (A) (A) (A) (A) (A) (A) (A)
                 (A) (A) (A) (A) (A) (A) (A) (A) (A) (A) (A) (A)
                 (A) (A) (A) (A) (A) (A) (A) (A) (A) (A) (A) (A)
                 (A) (A) (A) (A) (A) (A) (A) (A) (A) (A) (A) (A)
                 (A) (A) (A) (A) (A) (A) (A) (A) (A) (A) (A) (A)
                 (A) (A) (A) (A) (A) (A) (A) (A) (A) (A) (A) (A)
                 (A) (A) (A) (A) (A) (A) (A) (A) (A) (A) (A) (A)
                 (A) (A) (A) (A) (A) (A) (A) (A) (A) (A) (A) (A)
                 (A) (A) (A) (A) (A) (A) (A) (A) (A) (A) (A) (A)
                 (A) (A) (A) (A) (A) (A) (A) (A) (A) (A) (A) (A)
                 (A) (A) (A) (A) (A) (A) (A) (A) (A) (A) (A) (A)
                 (A) (A) (A) (A) (A) (A) (A) (A) (A) (A) (A) (A)
                 (A) (A) (A) (A) (A) (A) (A) (A) (A) (A) (A) (A)
                 (A) (A) (A) (A) (A) (A) (A) (A) (A) (A) (A) (A)
                 (A) (A) (A) (A) (A) (A) (A) (A) (A) (A) (A) (A)
                 (A) (A) (A) (A) (A) (A) (A) (A) (A) (A) (A) (A)
                 (A) (A) (A) (A) (A) (A) (A) (A) (A) (A) (A) (A)
                 (A) (A) (A) (A) (A) (A) (A) (A) (A) (A) (A) (A)
                 (A) (A) (A) (A) (A) (A) (A) (A) (A) (A) (A) (A)
                 (A) (A) (A) (A) (A) (A) (A) (A) (A) (A) (A) (A)
                 (A) (A) (A) (A) (A) (A) (A) (A) (A) (A) (A) (A)
                 (A) (A) (A) (A) (A) (A) (A) (A) (A) (A) (A) (A)
                 (A) (A) (A) (A) (A) (A) (A) (A) (A) (A) (A) (A)
                 (A) (A) (A) (A) (A) (A) (A) (A) (A) (A) (A) (A)
                 (A) (A) (A) (A) (A) (A) (A) (A) (A) (A) (A) (A)
                 (A) (A) (A) (A) (A) (A) (A) (A) (A) (A) (A) (A)
                 (A) (A) (A) (A) (A) (A) (A) (A) (A) (A) (A) (A)
                 (A) (A) (A) (A) (A) (A) (A) (A) (A) (A) (A) (A)
                 (A) (A) (A) (A) (A) (A) (A) (A) (A) (A) (A) (A)
                 (A) (A) (A) (A) (A) (A) (A) (A) (A) (A) (A) (A)
                 (A) (A) (A) (A) (A) (A) (A) (A) (A) (A) (A) (A)
                 (A) (A) (A) (A) (A) (A) (A) (A) (A) (A) (A) (A)
                 (A) (A) (A) (A) (A) (A) (A) (A) (A) (A) (A) (A)
                 (A) (A) (A) (A) (A) (A) (A) (A) (A) (A) (A) (A)
                 (A) (A) (A) (A)
 Beta  Orbitals:
       Occupied  (A) (A) (A) (A) (A) (A) (A) (A) (A) (A) (A) (A)
                 (A) (A) (A) (A) (A) (A) (A) (A) (A) (A) (A) (A)
                 (A) (A) (A) (A) (A) (A) (A) (A) (A) (A) (A) (A)
                 (A) (A) (A) (A) (A) (A) (A) (A) (A) (A) (A) (A)
                 (A) (A) (A) (A) (A) (A) (A) (A) (A) (A) (A) (A)
                 (A) (A) (A) (A) (A) (A) (A) (A) (A) (A) (A)
       Virtual   (A) (A) (A) (A) (A) (A) (A) (A) (A) (A) (A) (A)
                 (A) (A) (A) (A) (A) (A) (A) (A) (A) (A) (A) (A)
                 (A) (A) (A) (A) (A) (A) (A) (A) (A) (A) (A) (A)
                 (A) (A) (A) (A) (A) (A) (A) (A) (A) (A) (A) (A)
                 (A) (A) (A) (A) (A) (A) (A) (A) (A) (A) (A) (A)
                 (A) (A) (A) (A) (A) (A) (A) (A) (A) (A) (A) (A)
                 (A) (A) (A) (A) (A) (A) (A) (A) (A) (A) (A) (A)
                 (A) (A) (A) (A) (A) (A) (A) (A) (A) (A) (A) (A)
                 (A) (A) (A) (A) (A) (A) (A) (A) (A) (A) (A) (A)
                 (A) (A) (A) (A) (A) (A) (A) (A) (A) (A) (A) (A)
                 (A) (A) (A) (A) (A) (A) (A) (A) (A) (A) (A) (A)
                 (A) (A) (A) (A) (A) (A) (A) (A) (A) (A) (A) (A)
                 (A) (A) (A) (A) (A) (A) (A) (A) (A) (A) (A) (A)
                 (A) (A) (A) (A) (A) (A) (A) (A) (A) (A) (A) (A)
                 (A) (A) (A) (A) (A) (A) (A) (A) (A) (A) (A) (A)
                 (A) (A) (A) (A) (A) (A) (A) (A) (A) (A) (A) (A)
                 (A) (A) (A) (A) (A) (A) (A) (A) (A) (A) (A) (A)
                 (A) (A) (A) (A) (A) (A) (A) (A) (A) (A) (A) (A)
                 (A) (A) (A) (A) (A) (A) (A) (A) (A) (A) (A) (A)
                 (A) (A) (A) (A) (A) (A) (A) (A) (A) (A) (A) (A)
                 (A) (A) (A) (A) (A) (A) (A) (A) (A) (A) (A) (A)
                 (A) (A) (A) (A) (A) (A) (A) (A) (A) (A) (A) (A)
                 (A) (A) (A) (A) (A) (A) (A) (A) (A) (A) (A) (A)
                 (A) (A) (A) (A) (A) (A) (A) (A) (A) (A) (A) (A)
                 (A) (A) (A) (A) (A) (A) (A) (A) (A) (A) (A) (A)
                 (A) (A) (A) (A) (A) (A) (A) (A) (A) (A) (A) (A)
                 (A) (A) (A) (A) (A) (A) (A) (A) (A) (A) (A) (A)
                 (A) (A) (A) (A) (A) (A) (A) (A) (A) (A) (A) (A)
                 (A) (A) (A) (A) (A) (A) (A) (A) (A) (A) (A) (A)
                 (A) (A) (A) (A) (A) (A) (A) (A) (A) (A) (A) (A)
                 (A) (A) (A) (A) (A) (A) (A) (A) (A) (A) (A) (A)
                 (A) (A) (A) (A) (A) (A) (A) (A) (A) (A) (A) (A)
                 (A) (A) (A) (A) (A) (A) (A) (A) (A) (A) (A) (A)
                 (A) (A) (A) (A) (A) (A) (A) (A) (A) (A) (A) (A)
                 (A) (A) (A) (A) (A) (A) (A) (A) (A) (A) (A) (A)
                 (A) (A) (A) (A) (A) (A) (A) (A) (A) (A) (A) (A)
                 (A) (A) (A) (A) (A) (A) (A) (A) (A) (A) (A) (A)
                 (A) (A) (A) (A) (A) (A) (A) (A) (A) (A) (A) (A)
                 (A) (A) (A) (A) (A) (A) (A) (A) (A) (A) (A) (A)
                 (A) (A) (A) (A) (A) (A) (A) (A) (A) (A) (A) (A)
                 (A) (A) (A) (A) (A) (A) (A) (A) (A) (A) (A) (A)
                 (A) (A) (A) (A) (A) (A) (A) (A) (A) (A) (A) (A)
                 (A) (A) (A) (A) (A) (A) (A) (A) (A) (A) (A) (A)
                 (A) (A) (A) (A) (A)
 The electronic state is 2-A.
 Alpha  occ. eigenvalues -- -485.38597 -63.37062 -57.18997 -57.18769 -57.18753
 Alpha  occ. eigenvalues --  -19.69018 -19.61669 -10.64373 -10.63249 -10.61838
 Alpha  occ. eigenvalues --  -10.58432 -10.57645 -10.57525 -10.57502 -10.57357
 Alpha  occ. eigenvalues --  -10.57023 -10.56653 -10.55991 -10.55845 -10.55760
 Alpha  occ. eigenvalues --  -10.55677  -9.03705  -6.86103  -6.85246  -6.85202
 Alpha  occ. eigenvalues --   -2.89482  -2.89171  -2.89130  -2.88323  -2.88322
 Alpha  occ. eigenvalues --   -1.22547  -1.16353  -1.00685  -0.98479  -0.93457
 Alpha  occ. eigenvalues --   -0.89523  -0.88268  -0.86895  -0.84338  -0.79935
 Alpha  occ. eigenvalues --   -0.75412  -0.72560  -0.69893  -0.69713  -0.65047
 Alpha  occ. eigenvalues --   -0.63695  -0.61491  -0.56409  -0.55712  -0.54976
 Alpha  occ. eigenvalues --   -0.54649  -0.54253  -0.53416  -0.51427  -0.50707
 Alpha  occ. eigenvalues --   -0.50542  -0.50407  -0.47257  -0.47162  -0.45441
 Alpha  occ. eigenvalues --   -0.44574  -0.43431  -0.42199  -0.41655  -0.40197
 Alpha  occ. eigenvalues --   -0.36278  -0.35744  -0.34258  -0.34217  -0.33127
 Alpha  occ. eigenvalues --   -0.31430  -0.22913
 Alpha virt. eigenvalues --   -0.05315  -0.01628   0.00876   0.02575   0.06139
 Alpha virt. eigenvalues --    0.06471   0.08038   0.09254   0.10453   0.10982
 Alpha virt. eigenvalues --    0.11708   0.12992   0.13666   0.14313   0.14870
 Alpha virt. eigenvalues --    0.16321   0.16639   0.17551   0.18427   0.20606
 Alpha virt. eigenvalues --    0.21195   0.21516   0.21840   0.22191   0.22837
 Alpha virt. eigenvalues --    0.23120   0.23131   0.24430   0.24906   0.25814
 Alpha virt. eigenvalues --    0.25970   0.26831   0.26982   0.27437   0.27474
 Alpha virt. eigenvalues --    0.27742   0.28595   0.29391   0.29629   0.30030
 Alpha virt. eigenvalues --    0.30390   0.31868   0.32080   0.32575   0.33369
 Alpha virt. eigenvalues --    0.33405   0.33997   0.34969   0.35272   0.36233
 Alpha virt. eigenvalues --    0.36267   0.37219   0.38009   0.38606   0.38681
 Alpha virt. eigenvalues --    0.39433   0.40400   0.40980   0.41343   0.41547
 Alpha virt. eigenvalues --    0.42942   0.43277   0.44060   0.44382   0.45301
 Alpha virt. eigenvalues --    0.46480   0.46606   0.47667   0.48602   0.48904
 Alpha virt. eigenvalues --    0.50633   0.50890   0.51475   0.51683   0.51923
 Alpha virt. eigenvalues --    0.52679   0.53595   0.54072   0.54943   0.55948
 Alpha virt. eigenvalues --    0.56204   0.57135   0.57793   0.59404   0.60419
 Alpha virt. eigenvalues --    0.60545   0.61746   0.63230   0.64769   0.65266
 Alpha virt. eigenvalues --    0.65926   0.66253   0.67468   0.67588   0.68471
 Alpha virt. eigenvalues --    0.68585   0.69133   0.70285   0.70990   0.72311
 Alpha virt. eigenvalues --    0.72971   0.73745   0.74321   0.74553   0.76116
 Alpha virt. eigenvalues --    0.76584   0.76743   0.77124   0.77917   0.78581
 Alpha virt. eigenvalues --    0.78772   0.79560   0.81186   0.81496   0.82111
 Alpha virt. eigenvalues --    0.82494   0.85343   0.85911   0.87158   0.87712
 Alpha virt. eigenvalues --    0.87973   0.88642   0.90671   0.91323   0.91619
 Alpha virt. eigenvalues --    0.91776   0.92428   0.92878   0.93447   0.96183
 Alpha virt. eigenvalues --    0.97960   0.98472   0.99314   0.99797   1.00014
 Alpha virt. eigenvalues --    1.00730   1.03864   1.04650   1.05321   1.06388
 Alpha virt. eigenvalues --    1.07401   1.10713   1.10833   1.11444   1.12681
 Alpha virt. eigenvalues --    1.13299   1.14766   1.15615   1.15778   1.19326
 Alpha virt. eigenvalues --    1.21069   1.21283   1.22248   1.23635   1.24246
 Alpha virt. eigenvalues --    1.24394   1.25997   1.26389   1.26780   1.27214
 Alpha virt. eigenvalues --    1.28787   1.29203   1.29810   1.31930   1.34236
 Alpha virt. eigenvalues --    1.34282   1.35212   1.37754   1.37757   1.39574
 Alpha virt. eigenvalues --    1.39746   1.41108   1.41385   1.42592   1.43142
 Alpha virt. eigenvalues --    1.45532   1.46090   1.46568   1.47473   1.48491
 Alpha virt. eigenvalues --    1.49178   1.49650   1.51568   1.52290   1.52652
 Alpha virt. eigenvalues --    1.53343   1.53494   1.53664   1.54540   1.56960
 Alpha virt. eigenvalues --    1.57111   1.58466   1.59109   1.60540   1.61487
 Alpha virt. eigenvalues --    1.62085   1.62283   1.64380   1.64420   1.64969
 Alpha virt. eigenvalues --    1.65845   1.66809   1.67848   1.67875   1.69657
 Alpha virt. eigenvalues --    1.69741   1.71810   1.72121   1.72799   1.73384
 Alpha virt. eigenvalues --    1.75012   1.75389   1.77024   1.77117   1.78434
 Alpha virt. eigenvalues --    1.79879   1.80261   1.81903   1.83413   1.85567
 Alpha virt. eigenvalues --    1.86235   1.87579   1.87800   1.88786   1.91361
 Alpha virt. eigenvalues --    1.91490   1.91558   1.92150   1.93579   1.93708
 Alpha virt. eigenvalues --    1.95821   1.99250   1.99714   2.01661   2.03208
 Alpha virt. eigenvalues --    2.03605   2.04031   2.08361   2.08603   2.09958
 Alpha virt. eigenvalues --    2.12084   2.14120   2.15145   2.16775   2.17617
 Alpha virt. eigenvalues --    2.18316   2.19413   2.20035   2.20706   2.20777
 Alpha virt. eigenvalues --    2.22021   2.22614   2.24952   2.26749   2.28420
 Alpha virt. eigenvalues --    2.30739   2.32375   2.34481   2.34807   2.35873
 Alpha virt. eigenvalues --    2.36093   2.36468   2.37647   2.39306   2.42846
 Alpha virt. eigenvalues --    2.44969   2.46064   2.48469   2.49830   2.52802
 Alpha virt. eigenvalues --    2.53890   2.54185   2.54283   2.58187   2.59265
 Alpha virt. eigenvalues --    2.59793   2.60901   2.61150   2.61626   2.62582
 Alpha virt. eigenvalues --    2.63681   2.64676   2.65084   2.67532   2.68564
 Alpha virt. eigenvalues --    2.68670   2.68991   2.71024   2.72072   2.72830
 Alpha virt. eigenvalues --    2.74251   2.75112   2.75884   2.76885   2.77465
 Alpha virt. eigenvalues --    2.78185   2.78614   2.80977   2.81203   2.81634
 Alpha virt. eigenvalues --    2.82539   2.82639   2.84482   2.85077   2.86787
 Alpha virt. eigenvalues --    2.87260   2.88102   2.88763   2.89057   2.89632
 Alpha virt. eigenvalues --    2.90147   2.90550   2.91544   2.93155   2.93876
 Alpha virt. eigenvalues --    2.95075   2.95572   2.96619   2.97913   2.98241
 Alpha virt. eigenvalues --    2.98924   2.99453   3.00613   3.02838   3.02867
 Alpha virt. eigenvalues --    3.03585   3.04480   3.05156   3.05646   3.08039
 Alpha virt. eigenvalues --    3.09930   3.10427   3.11577   3.11870   3.12195
 Alpha virt. eigenvalues --    3.12876   3.15120   3.15633   3.16426   3.17176
 Alpha virt. eigenvalues --    3.17879   3.19004   3.19160   3.20004   3.20744
 Alpha virt. eigenvalues --    3.22673   3.23502   3.23857   3.26149   3.28372
 Alpha virt. eigenvalues --    3.28637   3.29447   3.30605   3.30931   3.31269
 Alpha virt. eigenvalues --    3.32049   3.32911   3.33178   3.33765   3.35238
 Alpha virt. eigenvalues --    3.36891   3.38466   3.39006   3.40172   3.41771
 Alpha virt. eigenvalues --    3.41812   3.43253   3.43782   3.44294   3.46060
 Alpha virt. eigenvalues --    3.46761   3.46770   3.47054   3.47993   3.50063
 Alpha virt. eigenvalues --    3.50425   3.51236   3.52260   3.53146   3.53731
 Alpha virt. eigenvalues --    3.55132   3.56161   3.56798   3.57051   3.58752
 Alpha virt. eigenvalues --    3.59720   3.61748   3.63201   3.63991   3.65977
 Alpha virt. eigenvalues --    3.66781   3.69322   3.74841   3.76776   3.78242
 Alpha virt. eigenvalues --    3.78984   3.79138   3.79949   3.84360   3.84985
 Alpha virt. eigenvalues --    3.85424   3.86376   3.87664   3.89934   3.93304
 Alpha virt. eigenvalues --    3.95679   3.97981   3.98141   3.99152   4.01560
 Alpha virt. eigenvalues --    4.02806   4.04468   4.05448   4.05710   4.06060
 Alpha virt. eigenvalues --    4.09995   4.10590   4.11409   4.11838   4.12422
 Alpha virt. eigenvalues --    4.14299   4.15022   4.16031   4.17516   4.19086
 Alpha virt. eigenvalues --    4.20350   4.20765   4.21146   4.22310   4.22562
 Alpha virt. eigenvalues --    4.25469   4.26865   4.27663   4.28775   4.32373
 Alpha virt. eigenvalues --    4.33282   4.37292   4.37806   4.40005   4.40517
 Alpha virt. eigenvalues --    4.44178   4.48590   4.50408   4.52484   4.54592
 Alpha virt. eigenvalues --    4.54975   4.55336   4.57466   4.62302   4.64915
 Alpha virt. eigenvalues --    4.67312   4.69055   4.69589   4.71342   4.74811
 Alpha virt. eigenvalues --    4.76074   4.77658   4.79208   4.83026   4.87266
 Alpha virt. eigenvalues --    4.92686   4.96592   4.98740   5.01237   5.02914
 Alpha virt. eigenvalues --    5.06730   5.09879   5.17020   5.18700   5.21030
 Alpha virt. eigenvalues --    5.22432   5.24195   5.26712   5.29032   5.30942
 Alpha virt. eigenvalues --    5.36018   5.38782   5.42098   5.48067   5.48450
 Alpha virt. eigenvalues --    5.54595   5.58582   5.60822   5.67886   5.74242
 Alpha virt. eigenvalues --    5.77356   5.85303   6.02838   6.06211   6.33951
 Alpha virt. eigenvalues --    6.36455   6.37589   6.39721   6.42297   6.65864
 Alpha virt. eigenvalues --    6.69794   6.74725   6.80648   6.82194   7.00260
 Alpha virt. eigenvalues --    7.09336   7.16883   7.33920   7.85436  22.07483
 Alpha virt. eigenvalues --   22.57848  22.74099  22.76524  22.80700  22.81179
 Alpha virt. eigenvalues --   22.91308  22.97015  22.98526  23.07476  23.22257
 Alpha virt. eigenvalues --   23.40486  23.44124  23.97487  44.09672  44.22437
  Beta  occ. eigenvalues -- -485.38594 -63.37059 -57.19000 -57.18755 -57.18752
  Beta  occ. eigenvalues --  -19.68762 -19.61315 -10.64077 -10.63268 -10.61747
  Beta  occ. eigenvalues --  -10.58498 -10.57586 -10.57569 -10.57441 -10.57389
  Beta  occ. eigenvalues --  -10.57062 -10.56584 -10.55947 -10.55857 -10.55773
  Beta  occ. eigenvalues --  -10.55636  -9.03700  -6.86113  -6.85220  -6.85200
  Beta  occ. eigenvalues --   -2.89483  -2.89163  -2.89134  -2.88313  -2.88312
  Beta  occ. eigenvalues --   -1.21693  -1.15446  -1.00414  -0.98317  -0.93108
  Beta  occ. eigenvalues --   -0.89294  -0.87901  -0.86759  -0.84174  -0.79243
  Beta  occ. eigenvalues --   -0.75230  -0.72239  -0.69773  -0.69372  -0.64773
  Beta  occ. eigenvalues --   -0.63462  -0.61191  -0.56166  -0.55570  -0.54633
  Beta  occ. eigenvalues --   -0.53935  -0.53224  -0.52540  -0.51296  -0.50550
  Beta  occ. eigenvalues --   -0.50123  -0.48335  -0.46992  -0.46601  -0.45303
  Beta  occ. eigenvalues --   -0.43340  -0.43323  -0.41961  -0.41536  -0.39078
  Beta  occ. eigenvalues --   -0.36241  -0.34049  -0.33683  -0.33200  -0.32048
  Beta  occ. eigenvalues --   -0.31016
  Beta virt. eigenvalues --   -0.09848  -0.03891  -0.00378   0.01228   0.02759
  Beta virt. eigenvalues --    0.06582   0.08100   0.09203   0.09252   0.10471
  Beta virt. eigenvalues --    0.10919   0.11670   0.12885   0.13645   0.14278
  Beta virt. eigenvalues --    0.14805   0.16275   0.17199   0.17393   0.18341
  Beta virt. eigenvalues --    0.20386   0.21368   0.21478   0.22060   0.22248
  Beta virt. eigenvalues --    0.22850   0.22995   0.23356   0.24465   0.24972
  Beta virt. eigenvalues --    0.25767   0.25939   0.26925   0.26950   0.27388
  Beta virt. eigenvalues --    0.27910   0.27921   0.28567   0.29583   0.29591
  Beta virt. eigenvalues --    0.30042   0.30485   0.32028   0.32115   0.32660
  Beta virt. eigenvalues --    0.33309   0.33549   0.33904   0.34793   0.35159
  Beta virt. eigenvalues --    0.36126   0.36558   0.37169   0.37963   0.38622
  Beta virt. eigenvalues --    0.38805   0.39556   0.40365   0.41094   0.41428
  Beta virt. eigenvalues --    0.41561   0.42999   0.43347   0.43689   0.44400
  Beta virt. eigenvalues --    0.45515   0.46477   0.46633   0.47697   0.48736
  Beta virt. eigenvalues --    0.48992   0.50539   0.50806   0.51470   0.51661
  Beta virt. eigenvalues --    0.52026   0.53058   0.53590   0.54030   0.54969
  Beta virt. eigenvalues --    0.56059   0.56293   0.57405   0.57923   0.59575
  Beta virt. eigenvalues --    0.60521   0.60765   0.61656   0.63178   0.64577
  Beta virt. eigenvalues --    0.65322   0.65876   0.66224   0.67552   0.67597
  Beta virt. eigenvalues --    0.68533   0.68688   0.69174   0.70213   0.70962
  Beta virt. eigenvalues --    0.72336   0.72696   0.73739   0.74393   0.74510
  Beta virt. eigenvalues --    0.76153   0.76484   0.77073   0.77084   0.78238
  Beta virt. eigenvalues --    0.78583   0.78761   0.79625   0.81491   0.81693
  Beta virt. eigenvalues --    0.82443   0.82608   0.85432   0.85936   0.87281
  Beta virt. eigenvalues --    0.87805   0.88089   0.88731   0.90492   0.91405
  Beta virt. eigenvalues --    0.91605   0.91815   0.92410   0.93138   0.93408
  Beta virt. eigenvalues --    0.96161   0.98085   0.98482   0.99402   1.00015
  Beta virt. eigenvalues --    1.00118   1.00853   1.03836   1.05090   1.05208
  Beta virt. eigenvalues --    1.06413   1.07493   1.10908   1.10969   1.11580
  Beta virt. eigenvalues --    1.12727   1.13411   1.14985   1.15754   1.15884
  Beta virt. eigenvalues --    1.19383   1.21121   1.21354   1.22624   1.23841
  Beta virt. eigenvalues --    1.24452   1.24598   1.26087   1.26598   1.27043
  Beta virt. eigenvalues --    1.27358   1.28872   1.29536   1.29909   1.32003
  Beta virt. eigenvalues --    1.34364   1.34461   1.35343   1.37804   1.37939
  Beta virt. eigenvalues --    1.39796   1.40026   1.41429   1.42242   1.42659
  Beta virt. eigenvalues --    1.43597   1.45691   1.46609   1.46665   1.47670
  Beta virt. eigenvalues --    1.48635   1.49375   1.49883   1.51719   1.52402
  Beta virt. eigenvalues --    1.53149   1.53676   1.53685   1.54883   1.54895
  Beta virt. eigenvalues --    1.57025   1.57585   1.58608   1.59310   1.60727
  Beta virt. eigenvalues --    1.61766   1.62454   1.62562   1.64449   1.64755
  Beta virt. eigenvalues --    1.65342   1.66133   1.67602   1.68038   1.68163
  Beta virt. eigenvalues --    1.70071   1.70180   1.72149   1.72542   1.72928
  Beta virt. eigenvalues --    1.73588   1.75128   1.75437   1.77223   1.77252
  Beta virt. eigenvalues --    1.78615   1.80032   1.80329   1.82220   1.83645
  Beta virt. eigenvalues --    1.86057   1.86336   1.87724   1.88122   1.89101
  Beta virt. eigenvalues --    1.91725   1.91957   1.92216   1.92305   1.93788
  Beta virt. eigenvalues --    1.94094   1.96284   1.99548   1.99968   2.02248
  Beta virt. eigenvalues --    2.03491   2.03948   2.04168   2.08610   2.08914
  Beta virt. eigenvalues --    2.10200   2.12380   2.14653   2.15390   2.17207
  Beta virt. eigenvalues --    2.17978   2.18627   2.19683   2.20318   2.20893
  Beta virt. eigenvalues --    2.21290   2.22288   2.23327   2.25214   2.26924
  Beta virt. eigenvalues --    2.28948   2.31086   2.32769   2.34623   2.35072
  Beta virt. eigenvalues --    2.36326   2.36857   2.36969   2.38334   2.39535
  Beta virt. eigenvalues --    2.43139   2.45181   2.46344   2.48639   2.50034
  Beta virt. eigenvalues --    2.53015   2.54355   2.54967   2.55707   2.58512
  Beta virt. eigenvalues --    2.59539   2.60031   2.61096   2.61312   2.61812
  Beta virt. eigenvalues --    2.63538   2.64651   2.64831   2.65863   2.68593
  Beta virt. eigenvalues --    2.68780   2.69192   2.69524   2.71921   2.72268
  Beta virt. eigenvalues --    2.73086   2.74429   2.75751   2.76043   2.77752
  Beta virt. eigenvalues --    2.77793   2.78456   2.79560   2.81140   2.81536
  Beta virt. eigenvalues --    2.82175   2.82820   2.83167   2.84927   2.85206
  Beta virt. eigenvalues --    2.87729   2.88354   2.88729   2.88929   2.89580
  Beta virt. eigenvalues --    2.90135   2.90933   2.91251   2.91846   2.94135
  Beta virt. eigenvalues --    2.94559   2.95599   2.96169   2.97535   2.98438
  Beta virt. eigenvalues --    2.98509   2.99378   3.00042   3.00816   3.03062
  Beta virt. eigenvalues --    3.03636   3.04112   3.05077   3.05705   3.05997
  Beta virt. eigenvalues --    3.08554   3.10482   3.10855   3.12010   3.12680
  Beta virt. eigenvalues --    3.12843   3.13599   3.15704   3.15924   3.16870
  Beta virt. eigenvalues --    3.17760   3.18633   3.19456   3.19964   3.20720
  Beta virt. eigenvalues --    3.21213   3.23112   3.24221   3.25400   3.27226
  Beta virt. eigenvalues --    3.28983   3.29359   3.29836   3.31112   3.31267
  Beta virt. eigenvalues --    3.31941   3.32597   3.33365   3.33696   3.34159
  Beta virt. eigenvalues --    3.35601   3.37533   3.38742   3.39327   3.41226
  Beta virt. eigenvalues --    3.42204   3.42327   3.43686   3.44468   3.44859
  Beta virt. eigenvalues --    3.46556   3.47412   3.47602   3.47728   3.48649
  Beta virt. eigenvalues --    3.50508   3.51231   3.51719   3.52862   3.53716
  Beta virt. eigenvalues --    3.54259   3.55494   3.56494   3.57355   3.57853
  Beta virt. eigenvalues --    3.59215   3.60510   3.61975   3.63422   3.64973
  Beta virt. eigenvalues --    3.66885   3.67110   3.69529   3.75864   3.77041
  Beta virt. eigenvalues --    3.78557   3.79578   3.79706   3.80939   3.84863
  Beta virt. eigenvalues --    3.85724   3.85845   3.86957   3.88028   3.90710
  Beta virt. eigenvalues --    3.93723   3.96456   3.98654   3.99586   4.01032
  Beta virt. eigenvalues --    4.01962   4.03299   4.04858   4.05550   4.06224
  Beta virt. eigenvalues --    4.06552   4.10262   4.11212   4.12093   4.12517
  Beta virt. eigenvalues --    4.12828   4.15133   4.15223   4.16365   4.17919
  Beta virt. eigenvalues --    4.19415   4.20687   4.21005   4.22036   4.22718
  Beta virt. eigenvalues --    4.23175   4.26473   4.27192   4.28023   4.29647
  Beta virt. eigenvalues --    4.33645   4.34037   4.37668   4.39248   4.40510
  Beta virt. eigenvalues --    4.40958   4.44849   4.48791   4.51091   4.52987
  Beta virt. eigenvalues --    4.55114   4.55682   4.56056   4.58069   4.62979
  Beta virt. eigenvalues --    4.65683   4.68782   4.69772   4.70325   4.72059
  Beta virt. eigenvalues --    4.75393   4.76486   4.78364   4.79846   4.83739
  Beta virt. eigenvalues --    4.88185   4.93278   4.97193   4.99964   5.02326
  Beta virt. eigenvalues --    5.04283   5.07785   5.10700   5.17779   5.19274
  Beta virt. eigenvalues --    5.22100   5.23222   5.24699   5.27605   5.30400
  Beta virt. eigenvalues --    5.31754   5.36846   5.39545   5.43107   5.48569
  Beta virt. eigenvalues --    5.48906   5.55485   5.59431   5.62358   5.69705
  Beta virt. eigenvalues --    5.75014   5.77828   5.86427   6.03530   6.07257
  Beta virt. eigenvalues --    6.34760   6.37227   6.39115   6.41661   6.42991
  Beta virt. eigenvalues --    6.67961   6.70531   6.75534   6.82686   6.82777
  Beta virt. eigenvalues --    7.00448   7.10322   7.17222   7.34134   7.85443
  Beta virt. eigenvalues --   22.07557  22.57917  22.74181  22.76582  22.80744
  Beta virt. eigenvalues --   22.81339  22.91465  22.97089  22.98705  23.07653
  Beta virt. eigenvalues --   23.22893  23.40687  23.44250  23.97828  44.09645
  Beta virt. eigenvalues --   44.22404
          Condensed to atoms (all electrons):
               1          2          3          4          5          6
     1  C    4.970572   0.455087  -0.039142  -0.060565   0.028594   0.420175
     2  C    0.455087   5.245230   0.355911  -0.051381  -0.151117   0.010240
     3  C   -0.039142   0.355911   5.285097   0.477480  -0.135439  -0.036191
     4  C   -0.060565  -0.051381   0.477480   5.654090   0.206665  -0.021701
     5  C    0.028594  -0.151117  -0.135439   0.206665   5.420357   0.418322
     6  C    0.420175   0.010240  -0.036191  -0.021701   0.418322   4.991001
     7  H    0.420607  -0.036076   0.005309   0.000347   0.005440  -0.035480
     8  H   -0.029250   0.411642  -0.021669   0.012266  -0.000756   0.003221
     9  H    0.006916  -0.002709   0.006019  -0.056782   0.429261  -0.030174
    10  H   -0.036265   0.005152   0.000739   0.006158  -0.036580   0.421883
    11  C   -0.004769   0.011511   0.093726   0.119538  -0.141804   0.015936
    12  O    0.000765  -0.000328   0.001536  -0.243714   0.058386   0.000479
    13  C    0.005021  -0.079482   0.214501   0.018434   0.018433  -0.001647
    14  C    0.003118  -0.004549  -0.171577   0.005256   0.092264  -0.006956
    15  C   -0.003144   0.032953  -0.034727  -0.141018  -0.005849   0.002580
    16  C   -0.000197   0.001747  -0.002679   0.082046  -0.014640   0.000280
    17  C    0.000231  -0.006595   0.053773  -0.008674   0.001682  -0.000129
    18  C   -0.000002  -0.000035   0.000906  -0.003916   0.000178  -0.000001
    19  H   -0.000002   0.000011  -0.000181   0.006647  -0.000644   0.000001
    20  C    0.000000  -0.000002  -0.000631   0.002120  -0.000181   0.000001
    21  H   -0.000003  -0.000042   0.003464  -0.000700  -0.000030   0.000002
    22  H    0.000000   0.000001   0.000007   0.000006   0.000000   0.000000
    23  Br   0.000000   0.000000  -0.000025   0.000090  -0.000003   0.000000
    24  O   -0.000994   0.032008  -0.163239  -0.004202  -0.000225   0.000378
    25  H   -0.000028  -0.001934   0.019473   0.000110   0.000012   0.000004
               7          8          9         10         11         12
     1  C    0.420607  -0.029250   0.006916  -0.036265  -0.004769   0.000765
     2  C   -0.036076   0.411642  -0.002709   0.005152   0.011511  -0.000328
     3  C    0.005309  -0.021669   0.006019   0.000739   0.093726   0.001536
     4  C    0.000347   0.012266  -0.056782   0.006158   0.119538  -0.243714
     5  C    0.005440  -0.000756   0.429261  -0.036580  -0.141804   0.058386
     6  C   -0.035480   0.003221  -0.030174   0.421883   0.015936   0.000479
     7  H    0.473927  -0.003128  -0.000139  -0.003411   0.000132   0.000002
     8  H   -0.003128   0.463938   0.000045  -0.000183   0.000669   0.000010
     9  H   -0.000139   0.000045   0.468948  -0.003491  -0.016207   0.021740
    10  H   -0.003411  -0.000183  -0.003491   0.473125  -0.000462  -0.000133
    11  C    0.000132   0.000669  -0.016207  -0.000462   5.100991   0.773375
    12  O    0.000002   0.000010   0.021740  -0.000133   0.773375   7.987349
    13  C   -0.000699  -0.023870   0.000138   0.000223  -0.162594  -0.009967
    14  C    0.000007  -0.000351   0.006162  -0.000047   0.027401  -0.256901
    15  C   -0.000021   0.000250  -0.000113   0.000006   0.067655   0.002311
    16  C    0.000000  -0.000026  -0.000697   0.000003  -0.094732   0.068438
    17  C    0.000002  -0.000075   0.000019   0.000000   0.015638  -0.000622
    18  C    0.000000   0.000004  -0.000004   0.000000   0.002287   0.001098
    19  H    0.000000   0.000000  -0.000060   0.000000  -0.011126   0.024339
    20  C    0.000000  -0.000011  -0.000002   0.000000   0.001852   0.001085
    21  H    0.000000  -0.000018   0.000000   0.000000   0.001053   0.000010
    22  H    0.000000   0.000000   0.000000   0.000000   0.000185   0.000002
    23  Br   0.000000   0.000000   0.000000   0.000000  -0.001679   0.000053
    24  O   -0.000102   0.009685   0.000006   0.000000  -0.000669   0.000001
    25  H    0.000000  -0.000248  -0.000001   0.000000  -0.000006  -0.000001
              13         14         15         16         17         18
     1  C    0.005021   0.003118  -0.003144  -0.000197   0.000231  -0.000002
     2  C   -0.079482  -0.004549   0.032953   0.001747  -0.006595  -0.000035
     3  C    0.214501  -0.171577  -0.034727  -0.002679   0.053773   0.000906
     4  C    0.018434   0.005256  -0.141018   0.082046  -0.008674  -0.003916
     5  C    0.018433   0.092264  -0.005849  -0.014640   0.001682   0.000178
     6  C   -0.001647  -0.006956   0.002580   0.000280  -0.000129  -0.000001
     7  H   -0.000699   0.000007  -0.000021   0.000000   0.000002   0.000000
     8  H   -0.023870  -0.000351   0.000250  -0.000026  -0.000075   0.000004
     9  H    0.000138   0.006162  -0.000113  -0.000697   0.000019  -0.000004
    10  H    0.000223  -0.000047   0.000006   0.000003   0.000000   0.000000
    11  C   -0.162594   0.027401   0.067655  -0.094732   0.015638   0.002287
    12  O   -0.009967  -0.256901   0.002311   0.068438  -0.000622   0.001098
    13  C    5.131665   0.061857   0.313640   0.024279  -0.109160  -0.005640
    14  C    0.061857   5.817624   0.477259   0.033890  -0.007383   0.048834
    15  C    0.313640   0.477259   5.262151  -0.122904   0.326256  -0.041654
    16  C    0.024279   0.033890  -0.122904   5.736670  -0.229640   0.283651
    17  C   -0.109160  -0.007383   0.326256  -0.229640   5.304411   0.082001
    18  C   -0.005640   0.048834  -0.041654   0.283651   0.082001   4.966246
    19  H    0.001018  -0.057300   0.005023   0.428277  -0.006398  -0.043560
    20  C    0.006069  -0.097759  -0.054257   0.102964   0.381908   0.320453
    21  H   -0.005349   0.007692  -0.052989   0.002298   0.396398  -0.001587
    22  H    0.000152  -0.002258   0.006635   0.014674  -0.030972  -0.052190
    23  Br  -0.000096   0.019625  -0.002852  -0.110946   0.022787   0.378379
    24  O    0.421480  -0.001861  -0.107323   0.000221   0.010646  -0.000274
    25  H   -0.019813   0.000202  -0.033751   0.000251   0.016455  -0.000202
              19         20         21         22         23         24
     1  C   -0.000002   0.000000  -0.000003   0.000000   0.000000  -0.000994
     2  C    0.000011  -0.000002  -0.000042   0.000001   0.000000   0.032008
     3  C   -0.000181  -0.000631   0.003464   0.000007  -0.000025  -0.163239
     4  C    0.006647   0.002120  -0.000700   0.000006   0.000090  -0.004202
     5  C   -0.000644  -0.000181  -0.000030   0.000000  -0.000003  -0.000225
     6  C    0.000001   0.000001   0.000002   0.000000   0.000000   0.000378
     7  H    0.000000   0.000000   0.000000   0.000000   0.000000  -0.000102
     8  H    0.000000  -0.000011  -0.000018   0.000000   0.000000   0.009685
     9  H   -0.000060  -0.000002   0.000000   0.000000   0.000000   0.000006
    10  H    0.000000   0.000000   0.000000   0.000000   0.000000   0.000000
    11  C   -0.011126   0.001852   0.001053   0.000185  -0.001679  -0.000669
    12  O    0.024339   0.001085   0.000010   0.000002   0.000053   0.000001
    13  C    0.001018   0.006069  -0.005349   0.000152  -0.000096   0.421480
    14  C   -0.057300  -0.097759   0.007692  -0.002258   0.019625  -0.001861
    15  C    0.005023  -0.054257  -0.052989   0.006635  -0.002852  -0.107323
    16  C    0.428277   0.102964   0.002298   0.014674  -0.110946   0.000221
    17  C   -0.006398   0.381908   0.396398  -0.030972   0.022787   0.010646
    18  C   -0.043560   0.320453  -0.001587  -0.052190   0.378379  -0.000274
    19  H    0.454841   0.014933   0.000047   0.000076  -0.005601   0.000007
    20  C    0.014933   5.173366   0.004549   0.420877  -0.098437   0.003227
    21  H    0.000047   0.004549   0.494999  -0.002866  -0.000279  -0.002159
    22  H    0.000076   0.420877  -0.002866   0.464169  -0.006297  -0.000006
    23  Br  -0.005601  -0.098437  -0.000279  -0.006297  34.906291   0.000000
    24  O    0.000007   0.003227  -0.002159  -0.000006   0.000000   7.902165
    25  H    0.000002   0.002342   0.005076   0.000037  -0.000001   0.312556
              25
     1  C   -0.000028
     2  C   -0.001934
     3  C    0.019473
     4  C    0.000110
     5  C    0.000012
     6  C    0.000004
     7  H    0.000000
     8  H   -0.000248
     9  H   -0.000001
    10  H    0.000000
    11  C   -0.000006
    12  O   -0.000001
    13  C   -0.019813
    14  C    0.000202
    15  C   -0.033751
    16  C    0.000251
    17  C    0.016455
    18  C   -0.000202
    19  H    0.000002
    20  C    0.002342
    21  H    0.005076
    22  H    0.000037
    23  Br  -0.000001
    24  O    0.312556
    25  H    0.339584
          Atomic-Atomic Spin Densities.
               1          2          3          4          5          6
     1  C   -0.064161   0.014994  -0.001206   0.006517  -0.000827  -0.017704
     2  C    0.014994   0.131895  -0.024947   0.007458  -0.001787  -0.005062
     3  C   -0.001206  -0.024947  -0.106999  -0.020491   0.004220   0.003619
     4  C    0.006517   0.007458  -0.020491   0.161976  -0.013715  -0.012813
     5  C   -0.000827  -0.001787   0.004220  -0.013715  -0.051964   0.019861
     6  C   -0.017704  -0.005062   0.003619  -0.012813   0.019861   0.130300
     7  H    0.000084   0.000129  -0.000043  -0.000046   0.000003  -0.001091
     8  H    0.000211   0.001485  -0.001008  -0.000010  -0.000049   0.000204
     9  H   -0.000067   0.000034   0.000047  -0.000274   0.000820  -0.000280
    10  H   -0.000758   0.000172   0.000009  -0.000123   0.000622   0.000148
    11  C   -0.000043  -0.000824  -0.005888   0.025663   0.005257   0.000121
    12  O   -0.000017  -0.000055  -0.000266  -0.008055   0.001990   0.000038
    13  C   -0.001453  -0.010761   0.048916  -0.015507   0.000103   0.000649
    14  C    0.000363  -0.000301  -0.007665   0.018953  -0.000757  -0.000743
    15  C   -0.000555   0.000756  -0.000890  -0.008898  -0.001561   0.000501
    16  C   -0.000005  -0.000025  -0.001177  -0.000361   0.000496   0.000007
    17  C    0.000022   0.000044  -0.000588   0.000597  -0.000045  -0.000006
    18  C    0.000000  -0.000011   0.000334  -0.000715   0.000009   0.000001
    19  H    0.000000  -0.000001  -0.000027  -0.000163   0.000048   0.000000
    20  C   -0.000001   0.000026  -0.000286   0.000225  -0.000003   0.000000
    21  H    0.000001  -0.000012   0.000037   0.000024   0.000001   0.000000
    22  H    0.000000   0.000000  -0.000001   0.000001   0.000000   0.000000
    23  Br   0.000000   0.000000  -0.000002   0.000004   0.000000   0.000000
    24  O    0.000283   0.005647  -0.001103   0.000346   0.000012  -0.000083
    25  H    0.000001   0.000008  -0.000174  -0.000026   0.000001   0.000000
               7          8          9         10         11         12
     1  C    0.000084   0.000211  -0.000067  -0.000758  -0.000043  -0.000017
     2  C    0.000129   0.001485   0.000034   0.000172  -0.000824  -0.000055
     3  C   -0.000043  -0.001008   0.000047   0.000009  -0.005888  -0.000266
     4  C   -0.000046  -0.000010  -0.000274  -0.000123   0.025663  -0.008055
     5  C    0.000003  -0.000049   0.000820   0.000622   0.005257   0.001990
     6  C   -0.001091   0.000204  -0.000280   0.000148   0.000121   0.000038
     7  H    0.001470  -0.000076   0.000000  -0.000034  -0.000005   0.000000
     8  H   -0.000076  -0.002732  -0.000001   0.000002  -0.000018   0.000000
     9  H    0.000000  -0.000001   0.000961  -0.000017   0.000868  -0.001117
    10  H   -0.000034   0.000002  -0.000017  -0.002961  -0.000014   0.000003
    11  C   -0.000005  -0.000018   0.000868  -0.000014  -0.070978  -0.035171
    12  O    0.000000   0.000000  -0.001117   0.000003  -0.035171   0.235626
    13  C    0.000019   0.000205  -0.000046   0.000003   0.017656   0.000561
    14  C    0.000003  -0.000018  -0.000200  -0.000002   0.026456  -0.009295
    15  C   -0.000006   0.000151  -0.000027   0.000002  -0.005731  -0.000024
    16  C    0.000000   0.000002   0.000047   0.000000   0.006247   0.001734
    17  C    0.000000  -0.000004  -0.000001   0.000000  -0.002085  -0.000047
    18  C    0.000000   0.000000  -0.000001   0.000000  -0.000032  -0.000199
    19  H    0.000000   0.000000   0.000005   0.000000   0.001095  -0.001232
    20  C    0.000000   0.000001   0.000000   0.000000   0.000305  -0.000031
    21  H    0.000000   0.000000   0.000000   0.000000  -0.000063   0.000000
    22  H    0.000000   0.000000   0.000000   0.000000  -0.000001   0.000000
    23  Br   0.000000   0.000000   0.000000   0.000000  -0.000010  -0.000010
    24  O    0.000002  -0.000693   0.000000   0.000000   0.000038  -0.000002
    25  H    0.000000   0.000010   0.000000   0.000000   0.000012   0.000000
              13         14         15         16         17         18
     1  C   -0.001453   0.000363  -0.000555  -0.000005   0.000022   0.000000
     2  C   -0.010761  -0.000301   0.000756  -0.000025   0.000044  -0.000011
     3  C    0.048916  -0.007665  -0.000890  -0.001177  -0.000588   0.000334
     4  C   -0.015507   0.018953  -0.008898  -0.000361   0.000597  -0.000715
     5  C    0.000103  -0.000757  -0.001561   0.000496  -0.000045   0.000009
     6  C    0.000649  -0.000743   0.000501   0.000007  -0.000006   0.000001
     7  H    0.000019   0.000003  -0.000006   0.000000   0.000000   0.000000
     8  H    0.000205  -0.000018   0.000151   0.000002  -0.000004   0.000000
     9  H   -0.000046  -0.000200  -0.000027   0.000047  -0.000001  -0.000001
    10  H    0.000003  -0.000002   0.000002   0.000000   0.000000   0.000000
    11  C    0.017656   0.026456  -0.005731   0.006247  -0.002085  -0.000032
    12  O    0.000561  -0.009295  -0.000024   0.001734  -0.000047  -0.000199
    13  C    0.428854  -0.014015   0.058738  -0.000705  -0.010364   0.000678
    14  C   -0.014015   0.197811  -0.029148  -0.018732   0.012934  -0.009346
    15  C    0.058738  -0.029148  -0.099395   0.004284  -0.030942   0.004627
    16  C   -0.000705  -0.018732   0.004284  -0.058836  -0.000990   0.013577
    17  C   -0.010364   0.012934  -0.030942  -0.000990   0.132701  -0.007105
    18  C    0.000678  -0.009346   0.004627   0.013577  -0.007105   0.160416
    19  H   -0.000074   0.000372  -0.000078   0.000767   0.000107  -0.000884
    20  C   -0.001335   0.005197  -0.001546  -0.000270   0.017263  -0.016568
    21  H    0.000689  -0.000079  -0.001749   0.000027   0.001263   0.000231
    22  H    0.000022  -0.000062  -0.000091  -0.000064   0.000307  -0.001092
    23  Br  -0.000009   0.000910  -0.000175  -0.000364   0.000481  -0.013207
    24  O   -0.083457   0.000662   0.000542  -0.000023   0.003792  -0.000038
    25  H    0.000029  -0.000132  -0.000082  -0.000017   0.000527   0.000014
              19         20         21         22         23         24
     1  C    0.000000  -0.000001   0.000001   0.000000   0.000000   0.000283
     2  C   -0.000001   0.000026  -0.000012   0.000000   0.000000   0.005647
     3  C   -0.000027  -0.000286   0.000037  -0.000001  -0.000002  -0.001103
     4  C   -0.000163   0.000225   0.000024   0.000001   0.000004   0.000346
     5  C    0.000048  -0.000003   0.000001   0.000000   0.000000   0.000012
     6  C    0.000000   0.000000   0.000000   0.000000   0.000000  -0.000083
     7  H    0.000000   0.000000   0.000000   0.000000   0.000000   0.000002
     8  H    0.000000   0.000001   0.000000   0.000000   0.000000  -0.000693
     9  H    0.000005   0.000000   0.000000   0.000000   0.000000   0.000000
    10  H    0.000000   0.000000   0.000000   0.000000   0.000000   0.000000
    11  C    0.001095   0.000305  -0.000063  -0.000001  -0.000010   0.000038
    12  O   -0.001232  -0.000031   0.000000   0.000000  -0.000010  -0.000002
    13  C   -0.000074  -0.001335   0.000689   0.000022  -0.000009  -0.083457
    14  C    0.000372   0.005197  -0.000079  -0.000062   0.000910   0.000662
    15  C   -0.000078  -0.001546  -0.001749  -0.000091  -0.000175   0.000542
    16  C    0.000767  -0.000270   0.000027  -0.000064  -0.000364  -0.000023
    17  C    0.000107   0.017263   0.001263   0.000307   0.000481   0.003792
    18  C   -0.000884  -0.016568   0.000231  -0.001092  -0.013207  -0.000038
    19  H    0.000194  -0.000189   0.000000   0.000001  -0.000045   0.000000
    20  C   -0.000189  -0.070717   0.000222   0.000058   0.002793   0.000071
    21  H    0.000000   0.000222  -0.003207  -0.000075   0.000000  -0.000160
    22  H    0.000001   0.000058  -0.000075   0.001253   0.000019   0.000000
    23  Br  -0.000045   0.002793   0.000000   0.000019   0.017688   0.000000
    24  O    0.000000   0.000071  -0.000160   0.000000   0.000000   0.157899
    25  H    0.000000  -0.000025  -0.000070  -0.000003   0.000000   0.000086
              25
     1  C    0.000001
     2  C    0.000008
     3  C   -0.000174
     4  C   -0.000026
     5  C    0.000001
     6  C    0.000000
     7  H    0.000000
     8  H    0.000010
     9  H    0.000000
    10  H    0.000000
    11  C    0.000012
    12  O    0.000000
    13  C    0.000029
    14  C   -0.000132
    15  C   -0.000082
    16  C   -0.000017
    17  C    0.000527
    18  C    0.000014
    19  H    0.000000
    20  C   -0.000025
    21  H   -0.000070
    22  H   -0.000003
    23  Br   0.000000
    24  O    0.000086
    25  H   -0.003023
 Mulliken charges and spin densities:
               1          2
     1  C   -0.136727  -0.064321
     2  C   -0.227241   0.118862
     3  C    0.087558  -0.115577
     4  C    0.001402   0.140566
     5  C   -0.192324  -0.037266
     6  C   -0.152221   0.117669
     7  H    0.173284   0.000408
     8  H    0.177857  -0.002338
     9  H    0.171125   0.000752
    10  H    0.173285  -0.002950
    11  C    0.202099  -0.037145
    12  O   -0.429312   0.184429
    13  C    0.201409   0.419397
    14  C    0.005752   0.173166
    15  C    0.103882  -0.111296
    16  C   -0.203227  -0.054382
    17  C   -0.212560   0.117864
    18  C    0.065030   0.130689
    19  H    0.189651  -0.000105
    20  C   -0.184465  -0.064809
    21  H    0.150430  -0.002919
    22  H    0.187768   0.000273
    23  Br  -0.101010   0.008074
    24  O   -0.411325   0.083823
    25  H    0.359878  -0.002864
 Sum of Mulliken charges =   0.00000   1.00000
 Mulliken charges and spin densities with hydrogens summed into heavy atoms:
               1          2
     1  C    0.036557  -0.063913
     2  C   -0.049384   0.116525
     3  C    0.087558  -0.115577
     4  C    0.001402   0.140566
     5  C   -0.021199  -0.036514
     6  C    0.021064   0.114719
    11  C    0.202099  -0.037145
    12  O   -0.429312   0.184429
    13  C    0.201409   0.419397
    14  C    0.005752   0.173166
    15  C    0.103882  -0.111296
    16  C   -0.013577  -0.054487
    17  C   -0.062129   0.114944
    18  C    0.065030   0.130689
    20  C    0.003304  -0.064536
    23  Br  -0.101010   0.008074
    24  O   -0.051447   0.080959
 Electronic spatial extent (au):  <R**2>=           6257.5577
 Charge=              0.0000 electrons
 Dipole moment (field-independent basis, Debye):
    X=              2.0789    Y=              6.9251    Z=              0.0000  Tot=              7.2304
 Quadrupole moment (field-independent basis, Debye-Ang):
   XX=            -96.5013   YY=           -102.3846   ZZ=           -114.3368
   XY=             -3.2523   XZ=              0.0003   YZ=              0.0001
 Traceless Quadrupole moment (field-independent basis, Debye-Ang):
   XX=              7.9063   YY=              2.0230   ZZ=             -9.9292
   XY=             -3.2523   XZ=              0.0003   YZ=              0.0001
 Octapole moment (field-independent basis, Debye-Ang**2):
  XXX=            -12.4972  YYY=             72.8875  ZZZ=             -0.0006  XYY=            -44.8945
  XXY=            -13.7526  XXZ=              0.0031  XZZ=            -51.9020  YZZ=             -3.4299
  YYZ=              0.0002  XYZ=             -0.0007
 Hexadecapole moment (field-independent basis, Debye-Ang**3):
 XXXX=          -5281.4935 YYYY=          -1256.2091 ZZZZ=           -128.6667 XXXY=            -11.9369
 XXXZ=             -0.0205 YYYX=             48.3274 YYYZ=              0.0134 ZZZX=             -0.0449
 ZZZY=              0.0118 XXYY=          -1143.7825 XXZZ=          -1098.2893 YYZZ=           -265.0969
 XXYZ=             -0.0032 YYXZ=             -0.0108 ZZXY=             30.9594
 N-N= 1.392250243427D+03 E-N=-1.054074246905D+04  KE= 3.256094648615D+03
                          Isotropic Fermi Contact Couplings
        Atom                 a.u.       MegaHertz       Gauss      10(-4) cm-1
     1  C(13)             -0.01019     -11.45756      -4.08834      -3.82183
     2  C(13)              0.01175      13.21071       4.71391       4.40662
     3  C(13)             -0.02545     -28.60719     -10.20776      -9.54233
     4  C(13)              0.01192      13.39987       4.78141       4.46971
     5  C(13)             -0.01077     -12.10966      -4.32103      -4.03935
     6  C(13)              0.01297      14.58088       5.20282       4.86366
     7  H(1)               0.00048       2.13212       0.76079       0.71120
     8  H(1)              -0.00158      -7.06051      -2.51936      -2.35513
     9  H(1)               0.00043       1.90284       0.67898       0.63472
    10  H(1)              -0.00171      -7.65327      -2.73088      -2.55286
    11  C(13)             -0.01310     -14.72773      -5.25522      -4.91264
    12  O(17)              0.03392     -20.56498      -7.33809      -6.85974
    13  C(13)              0.06389      71.82666      25.62954      23.95880
    14  C(13)              0.01519      17.07507       6.09281       5.69563
    15  C(13)             -0.02580     -28.99931     -10.34768      -9.67313
    16  C(13)             -0.01307     -14.69513      -5.24359      -4.90177
    17  C(13)              0.01241      13.94831       4.97710       4.65266
    18  C(13)              0.01839      20.67130       7.37603       6.89520
    19  H(1)               0.00053       2.36633       0.84437       0.78932
    20  C(13)             -0.01108     -12.45687      -4.44492      -4.15516
    21  H(1)              -0.00161      -7.21861      -2.57578      -2.40787
    22  H(1)               0.00052       2.33936       0.83474       0.78033
    23  Br(79)             0.00537       6.03189       2.15233       2.01202
    24  O(17)              0.01800     -10.90861      -3.89246      -3.63872
    25  H(1)              -0.00173      -7.73990      -2.76179      -2.58175
 --------------------------------------------------------
       Center         ----  Spin Dipole Couplings  ----
                      3XX-RR        3YY-RR        3ZZ-RR
 --------------------------------------------------------
     1   Atom        0.019546      0.019329     -0.038876
     2   Atom       -0.046740     -0.049032      0.095771
     3   Atom        0.031985      0.026954     -0.058939
     4   Atom       -0.054373     -0.057970      0.112343
     5   Atom        0.022264      0.013361     -0.035625
     6   Atom       -0.051496     -0.055080      0.106576
     7   Atom        0.000906      0.001062     -0.001968
     8   Atom       -0.000806      0.004447     -0.003641
     9   Atom        0.005292     -0.001901     -0.003391
    10   Atom        0.003116     -0.001872     -0.001244
    11   Atom       -0.013899      0.006837      0.007062
    12   Atom       -0.366767     -0.387309      0.754076
    13   Atom       -0.252183     -0.252805      0.504988
    14   Atom       -0.068155     -0.071372      0.139527
    15   Atom        0.034594      0.019858     -0.054452
    16   Atom        0.026206      0.019097     -0.045303
    17   Atom       -0.047509     -0.052298      0.099807
    18   Atom       -0.061435     -0.070890      0.132325
    19   Atom        0.005979     -0.002232     -0.003747
    20   Atom        0.023530      0.020375     -0.043905
    21   Atom       -0.003142      0.006550     -0.003409
    22   Atom        0.002372     -0.000294     -0.002078
    23   Atom       -0.150861     -0.057267      0.208128
    24   Atom       -0.258236     -0.285677      0.543913
    25   Atom        0.002960      0.006328     -0.009289
 --------------------------------------------------------
                        XY            XZ            YZ
 --------------------------------------------------------
     1   Atom       -0.002505      0.000002     -0.000002
     2   Atom       -0.002626     -0.000003      0.000004
     3   Atom       -0.006234      0.000000      0.000002
     4   Atom       -0.000782     -0.000007      0.000009
     5   Atom        0.000015      0.000001      0.000000
     6   Atom       -0.002510     -0.000005      0.000004
     7   Atom       -0.002110      0.000000      0.000000
     8   Atom        0.002630      0.000000      0.000000
     9   Atom       -0.001533      0.000000      0.000000
    10   Atom       -0.008326      0.000000      0.000000
    11   Atom        0.004520     -0.000001      0.000000
    12   Atom       -0.004718     -0.000021      0.000052
    13   Atom        0.000101     -0.000028     -0.000033
    14   Atom       -0.001172      0.000003      0.000007
    15   Atom        0.002775      0.000006      0.000001
    16   Atom       -0.003761      0.000001     -0.000001
    17   Atom        0.000949     -0.000001      0.000000
    18   Atom        0.001505      0.000001      0.000003
    19   Atom       -0.001730      0.000000      0.000000
    20   Atom        0.001807      0.000000     -0.000001
    21   Atom       -0.000076      0.000000      0.000000
    22   Atom        0.001617      0.000000      0.000000
    23   Atom       -0.030385      0.000000      0.000005
    24   Atom       -0.022139     -0.000027     -0.000057
    25   Atom       -0.019221     -0.000001      0.000001
 --------------------------------------------------------


 ---------------------------------------------------------------------------------
              Anisotropic Spin Dipole Couplings in Principal Axis System
 ---------------------------------------------------------------------------------

       Atom             a.u.   MegaHertz   Gauss  10(-4) cm-1        Axes

              Baa    -0.0389    -5.217    -1.861    -1.740  0.0000  0.0000  1.0000
     1 C(13)  Bbb     0.0169     2.272     0.811     0.758  0.6916  0.7222  0.0000
              Bcc     0.0219     2.945     1.051     0.982  0.7222 -0.6916  0.0000
 
              Baa    -0.0508    -6.810    -2.430    -2.272  0.5477  0.8366  0.0000
     2 C(13)  Bbb    -0.0450    -6.041    -2.156    -2.015  0.8366 -0.5477  0.0000
              Bcc     0.0958    12.852     4.586     4.287  0.0000  0.0000  1.0000
 
              Baa    -0.0589    -7.909    -2.822    -2.638  0.0000  0.0000  1.0000
     3 C(13)  Bbb     0.0227     3.053     1.089     1.018  0.5594  0.8289  0.0000
              Bcc     0.0362     4.857     1.733     1.620  0.8289 -0.5594  0.0000
 
              Baa    -0.0581    -7.801    -2.784    -2.602  0.2036  0.9791  0.0000
     4 C(13)  Bbb    -0.0542    -7.275    -2.596    -2.427  0.9791 -0.2036  0.0001
              Bcc     0.1123    15.075     5.379     5.029  0.0000  0.0001  1.0000
 
              Baa    -0.0356    -4.781    -1.706    -1.595  0.0000  0.0000  1.0000
     5 C(13)  Bbb     0.0134     1.793     0.640     0.598 -0.0017  1.0000  0.0000
              Bcc     0.0223     2.988     1.066     0.997  1.0000  0.0017  0.0000
 
              Baa    -0.0564    -7.565    -2.699    -2.523  0.4577  0.8891  0.0000
     6 C(13)  Bbb    -0.0502    -6.737    -2.404    -2.247  0.8891 -0.4577  0.0000
              Bcc     0.1066    14.302     5.103     4.770  0.0000  0.0000  1.0000
 
              Baa    -0.0020    -1.050    -0.375    -0.350  0.0000  0.0000  1.0000
     7 H(1)   Bbb    -0.0011    -0.601    -0.215    -0.201  0.7200  0.6940  0.0000
              Bcc     0.0031     1.651     0.589     0.551 -0.6940  0.7200  0.0000
 
              Baa    -0.0036    -1.943    -0.693    -0.648  0.0000  0.0000  1.0000
     8 H(1)   Bbb    -0.0019    -1.012    -0.361    -0.338  0.9237 -0.3831  0.0000
              Bcc     0.0055     2.955     1.054     0.986  0.3831  0.9237  0.0000
 
              Baa    -0.0034    -1.809    -0.646    -0.603  0.0000  0.0001  1.0000
     9 H(1)   Bbb    -0.0022    -1.181    -0.422    -0.394  0.2001  0.9798  0.0000
              Bcc     0.0056     2.990     1.067     0.998  0.9798 -0.2001  0.0000
 
              Baa    -0.0081    -4.306    -1.536    -1.436  0.5971  0.8022  0.0000
    10 H(1)   Bbb    -0.0012    -0.664    -0.237    -0.221  0.0000  0.0000  1.0000
              Bcc     0.0093     4.970     1.773     1.658  0.8022 -0.5971  0.0000
 
              Baa    -0.0148    -1.992    -0.711    -0.664  0.9789 -0.2041  0.0001
    11 C(13)  Bbb     0.0071     0.948     0.338     0.316  0.0000  0.0001  1.0000
              Bcc     0.0078     1.044     0.372     0.348  0.2041  0.9789 -0.0001
 
              Baa    -0.3883    28.100    10.027     9.373  0.2136  0.9769  0.0000
    12 O(17)  Bbb    -0.3657    26.464     9.443     8.828  0.9769 -0.2136  0.0000
              Bcc     0.7541   -54.564   -19.470   -18.201  0.0000  0.0000  1.0000
 
              Baa    -0.2528   -33.926   -12.106   -11.317 -0.1564  0.9877  0.0000
    13 C(13)  Bbb    -0.2522   -33.838   -12.074   -11.287  0.9877  0.1564  0.0000
              Bcc     0.5050    67.765    24.180    22.604  0.0000  0.0000  1.0000
 
              Baa    -0.0718    -9.629    -3.436    -3.212  0.3096  0.9509  0.0000
    14 C(13)  Bbb    -0.0678    -9.095    -3.245    -3.034  0.9509 -0.3096  0.0000
              Bcc     0.1395    18.723     6.681     6.245  0.0000  0.0000  1.0000
 
              Baa    -0.0545    -7.307    -2.607    -2.437 -0.0001  0.0000  1.0000
    15 C(13)  Bbb     0.0194     2.597     0.927     0.866 -0.1791  0.9838  0.0000
              Bcc     0.0351     4.710     1.681     1.571  0.9838  0.1791  0.0001
 
              Baa    -0.0453    -6.079    -2.169    -2.028  0.0000  0.0000  1.0000
    16 C(13)  Bbb     0.0175     2.345     0.837     0.782  0.3957  0.9184  0.0000
              Bcc     0.0278     3.734     1.332     1.246  0.9184 -0.3957  0.0000
 
              Baa    -0.0525    -7.042    -2.513    -2.349 -0.1876  0.9823  0.0000
    17 C(13)  Bbb    -0.0473    -6.351    -2.266    -2.118  0.9823  0.1876  0.0000
              Bcc     0.0998    13.393     4.779     4.467  0.0000  0.0000  1.0000
 
              Baa    -0.0711    -9.544    -3.406    -3.184 -0.1535  0.9882  0.0000
    18 C(13)  Bbb    -0.0612    -8.213    -2.930    -2.739  0.9882  0.1535  0.0000
              Bcc     0.1323    17.757     6.336     5.923  0.0000  0.0000  1.0000
 
              Baa    -0.0037    -1.999    -0.713    -0.667  0.0000  0.0000  1.0000
    19 H(1)   Bbb    -0.0026    -1.377    -0.491    -0.459  0.1981  0.9802  0.0000
              Bcc     0.0063     3.377     1.205     1.126  0.9802 -0.1981  0.0000
 
              Baa    -0.0439    -5.892    -2.102    -1.965  0.0000  0.0000  1.0000
    20 C(13)  Bbb     0.0196     2.624     0.936     0.875 -0.4138  0.9104  0.0000
              Bcc     0.0244     3.268     1.166     1.090  0.9104  0.4138  0.0000
 
              Baa    -0.0034    -1.819    -0.649    -0.607 -0.0001  0.0000  1.0000
    21 H(1)   Bbb    -0.0031    -1.677    -0.598    -0.559  1.0000  0.0079  0.0001
              Bcc     0.0066     3.495     1.247     1.166 -0.0079  1.0000  0.0000
 
              Baa    -0.0021    -1.109    -0.396    -0.370  0.0000  0.0000  1.0000
    22 H(1)   Bbb    -0.0011    -0.564    -0.201    -0.188 -0.4266  0.9045  0.0000
              Bcc     0.0031     1.673     0.597     0.558  0.9045  0.4266  0.0000
 
              Baa    -0.1599   -21.443    -7.651    -7.153  0.9588  0.2840  0.0000
    23 Br(79) Bbb    -0.0483    -6.475    -2.310    -2.160 -0.2840  0.9588  0.0000
              Bcc     0.2081    27.918     9.962     9.312  0.0000  0.0000  1.0000
 
              Baa    -0.2980    21.563     7.694     7.193  0.4864  0.8737  0.0001
    24 O(17)  Bbb    -0.2459    17.794     6.349     5.935  0.8737 -0.4864  0.0000
              Bcc     0.5439   -39.357   -14.044   -13.128  0.0000 -0.0001  1.0000
 
              Baa    -0.0147    -7.817    -2.789    -2.607  0.7373  0.6755  0.0001
    25 H(1)   Bbb    -0.0093    -4.956    -1.768    -1.653  0.0000 -0.0001  1.0000
              Bcc     0.0239    12.773     4.558     4.261 -0.6755  0.7373  0.0000
 

 ---------------------------------------------------------------------------------

 1|1|UNPC-SHENGFULIAO-PC|SP|UM062X|Gen|C14H8Br1O2(2)|SHENGFU LIAO|21-Ju
 l-2020|0||# um062x/gen scrf=(solvent=acetonitrile) geom=connectivity e
 mpiricaldispersion=gd3||HS2 energy||0,2|C,0,-3.09597521,-0.60371516,0.
 |C,0,-4.11284821,0.32936684,-0.000056|C,0,-5.46582721,-0.08525816,-0.0
 0009|C,0,-5.75902021,-1.47603216,-0.00006|C,0,-4.70657621,-2.40201116,
 -0.000004|C,0,-3.38945921,-1.97876716,0.000025|H,0,-2.06339621,-0.2727
 2516,0.000025|H,0,-3.88581621,1.38723384,-0.000075|H,0,-4.95569521,-3.
 45596516,0.000013|H,0,-2.58423021,-2.70452716,0.000068|C,0,-7.14543521
 ,-1.95957916,-0.000097|O,0,-7.41960721,-3.16733516,-0.000045|C,0,-6.52
 787521,0.86543784,-0.000142|C,0,-8.20203321,-0.93278916,-0.000123|C,0,
 -7.89212421,0.45837684,-0.000153|C,0,-9.53742521,-1.35316116,-0.000118
 |C,0,-8.96825421,1.38135484,-0.000159|C,0,-10.55418621,-0.42066816,-0.
 000135|H,0,-9.73878221,-2.41613116,-0.000098|C,0,-10.27841021,0.956210
 84,-0.000153|H,0,-8.79442821,2.45186584,-0.000153|H,0,-11.08537321,1.6
 7743984,-0.000154|Br,0,-12.37803421,-1.00187016,-0.00012|O,0,-6.152553
 21,2.15983984,-0.000038|H,0,-6.90873521,2.75839184,-0.000018||Version=
 IA32W-G09RevD.01|State=2-A|HF=-3262.9424275|S2=0.779277|S2-1=0.|S2A=0.
 750627|RMSD=7.542e-009|Dipole=0.8179123,2.7245513,-0.0000069|Quadrupol
 e=5.8781175,1.5040323,-7.3821498,-2.4179955,0.0002505,0.0000603|PG=C01
  [X(C14H8Br1O2)]||@


  THE LARGE PRINT GIVETH,
  AND THE SMALL PRINT TAKETH AWAY.

                     -- TOM WAITS
 Job cpu time:       0 days  1 hours 47 minutes 35.0 seconds.
 File lengths (MBytes):  RWF=    405 Int=      0 D2E=      0 Chk=     18 Scr=      1
 Normal termination of Gaussian 09 at Tue Jul 21 21:21:44 2020.
