# Supplementary material for: 2-Bromoanthraquinone as a highly efficient photocatalyst for the oxidation of sec-aromatic alcohols: experimental and DFT study
Source: Royal Society of Chemistry journal article supplement (doi:10.1039/d0ra06414a), 2020-01-01
Supplement: d0ra06414a3.out [file d0ra06414a3.out]

 Entering Link 1 = C:\software\gaussian\G09W\l1.exe PID=      8024.
  
 Copyright (c) 1988,1990,1992,1993,1995,1998,2003,2009,2013,
            Gaussian, Inc.  All Rights Reserved.
  
 This is part of the Gaussian(R) 09 program.  It is based on
 the Gaussian(R) 03 system (copyright 2003, Gaussian, Inc.),
 the Gaussian(R) 98 system (copyright 1998, Gaussian, Inc.),
 the Gaussian(R) 94 system (copyright 1995, Gaussian, Inc.),
 the Gaussian 92(TM) system (copyright 1992, Gaussian, Inc.),
 the Gaussian 90(TM) system (copyright 1990, Gaussian, Inc.),
 the Gaussian 88(TM) system (copyright 1988, Gaussian, Inc.),
 the Gaussian 86(TM) system (copyright 1986, Carnegie Mellon
 University), and the Gaussian 82(TM) system (copyright 1983,
 Carnegie Mellon University). Gaussian is a federally registered
 trademark of Gaussian, Inc.
  
 This software contains proprietary and confidential information,
 including trade secrets, belonging to Gaussian, Inc.
  
 This software is provided under written license and may be
 used, copied, transmitted, or stored only in accord with that
 written license.
  
 The following legend is applicable only to US Government
 contracts under FAR:
  
                    RESTRICTED RIGHTS LEGEND
  
 Use, reproduction and disclosure by the US Government is
 subject to restrictions as set forth in subparagraphs (a)
 and (c) of the Commercial Computer Software - Restricted
 Rights clause in FAR 52.227-19.
  
 Gaussian, Inc.
 340 Quinnipiac St., Bldg. 40, Wallingford CT 06492
  
  
 ---------------------------------------------------------------
 Warning -- This program may not be used in any manner that
 competes with the business of Gaussian, Inc. or will provide
 assistance to any competitor of Gaussian, Inc.  The licensee
 of this program is prohibited from giving any competitor of
 Gaussian, Inc. access to this program.  By using this program,
 the user acknowledges that Gaussian, Inc. is engaged in the
 business of creating and licensing software in the field of
 computational chemistry and represents and warrants to the
 licensee that it is not a competitor of Gaussian, Inc. and that
 it will not use this program in any manner prohibited above.
 ---------------------------------------------------------------
  

 Cite this work as:
 Gaussian 09, Revision D.01,
 M. J. Frisch, G. W. Trucks, H. B. Schlegel, G. E. Scuseria, 
 M. A. Robb, J. R. Cheeseman, G. Scalmani, V. Barone, B. Mennucci, 
 G. A. Petersson, H. Nakatsuji, M. Caricato, X. Li, H. P. Hratchian, 
 A. F. Izmaylov, J. Bloino, G. Zheng, J. L. Sonnenberg, M. Hada, 
 M. Ehara, K. Toyota, R. Fukuda, J. Hasegawa, M. Ishida, T. Nakajima, 
 Y. Honda, O. Kitao, H. Nakai, T. Vreven, J. A. Montgomery, Jr., 
 J. E. Peralta, F. Ogliaro, M. Bearpark, J. J. Heyd, E. Brothers, 
 K. N. Kudin, V. N. Staroverov, T. Keith, R. Kobayashi, J. Normand, 
 K. Raghavachari, A. Rendell, J. C. Burant, S. S. Iyengar, J. Tomasi, 
 M. Cossi, N. Rega, J. M. Millam, M. Klene, J. E. Knox, J. B. Cross, 
 V. Bakken, C. Adamo, J. Jaramillo, R. Gomperts, R. E. Stratmann, 
 O. Yazyev, A. J. Austin, R. Cammi, C. Pomelli, J. W. Ochterski, 
 R. L. Martin, K. Morokuma, V. G. Zakrzewski, G. A. Voth, 
 P. Salvador, J. J. Dannenberg, S. Dapprich, A. D. Daniels, 
 O. Farkas, J. B. Foresman, J. V. Ortiz, J. Cioslowski, 
 and D. J. Fox, Gaussian, Inc., Wallingford CT, 2013.
 
 ******************************************
 Gaussian 09:  IA32W-G09RevD.01 24-Apr-2013
                21-Jul-2020 
 ******************************************
 %nprocshared=4
 Will use up to    4 processors via shared memory.
 %mem=1500MB
 %chk=C:\Users\Shengfu Liao\Desktop\suppliment\HS2 opt.chk
 ----------------------------------------------------------------------
 # opt b3lyp/6-311g(d) scrf=(solvent=acetonitrile) geom=connectivity em
 piricaldispersion=gd3bj
 ----------------------------------------------------------------------
 1/14=-1,18=20,19=15,26=3,38=1,57=2/1,3;
 2/9=110,12=2,17=6,18=5,40=1/2;
 3/5=4,6=6,7=1,11=2,16=1,25=1,30=1,70=2201,71=1,72=2,74=-5,124=41/1,2,3;
 4//1;
 5/5=2,38=5,53=2/2;
 6/7=2,8=2,9=2,10=2,28=1/1;
 7//1,2,3,16;
 1/14=-1,18=20,19=15,26=3/3(2);
 2/9=110/2;
 99//99;
 2/9=110/2;
 3/5=4,6=6,7=1,11=2,16=1,25=1,30=1,70=2205,71=1,72=2,74=-5,124=41/1,2,3;
 4/5=5,16=3,69=1/1;
 5/5=2,38=5,53=2/2;
 7//1,2,3,16;
 1/14=-1,18=20,19=15,26=3/3(-5);
 2/9=110/2;
 6/7=2,8=2,9=2,10=2,19=2,28=1/1;
 99/9=1/99;
 -------
 HS2 opt
 -------
 Symbolic Z-matrix:
 Charge =  0 Multiplicity = 2
 C                    -5.09246   0.05399  0. 
 C                    -4.05731   0.98245   0.00012 
 C                    -2.72667   0.55532   0.00009 
 C                    -2.4384   -0.82296  -0.00008 
 C                    -3.48579  -1.74855  -0.00019 
 C                    -4.80632  -1.3135   -0.00016 
 H                    -6.12235   0.39328   0.00003 
 H                    -4.26299   2.04594   0.00025 
 H                    -3.24791  -2.8053   -0.00032 
 H                    -5.61369  -2.03729  -0.00025 
 C                    -1.03524  -1.31905  -0.00018 
 O                    -0.77807  -2.51315   0.00049 
 C                    -1.63933   1.57335   0.00029 
 C                     0.05427  -0.2972   -0.00002 
 C                    -0.23418   1.07795   0.00015 
 C                     1.38047  -0.73505  -0.00008 
 C                     0.81577   2.00025   0.00024 
 C                     2.40417   0.20188   0.00002 
 H                     1.58379  -1.79782  -0.00021 
 C                     2.13696   1.57193   0.00017 
 H                     0.58466   3.05837   0.00037 
 H                     2.94629   2.29119   0.00024 
 Br                    4.22262  -0.39691  -0.00008 
 O                    -1.88631   2.77043  -0.00044 
 H                    -1.06455   3.26672  -0.00074 
 

 GradGradGradGradGradGradGradGradGradGradGradGradGradGradGradGradGradGrad
 Berny optimization.
 Initialization pass.
                           ----------------------------
                           !    Initial Parameters    !
                           ! (Angstroms and Degrees)  !
 --------------------------                            --------------------------
 ! Name  Definition              Value          Derivative Info.                !
 --------------------------------------------------------------------------------
 ! R1    R(1,2)                  1.3905         estimate D2E/DX2                !
 ! R2    R(1,6)                  1.3971         estimate D2E/DX2                !
 ! R3    R(1,7)                  1.0843         estimate D2E/DX2                !
 ! R4    R(2,3)                  1.3975         estimate D2E/DX2                !
 ! R5    R(2,8)                  1.0832         estimate D2E/DX2                !
 ! R6    R(3,4)                  1.4081         estimate D2E/DX2                !
 ! R7    R(3,13)                 1.4895         estimate D2E/DX2                !
 ! R8    R(4,5)                  1.3978         estimate D2E/DX2                !
 ! R9    R(4,11)                 1.4883         estimate D2E/DX2                !
 ! R10   R(5,6)                  1.3903         estimate D2E/DX2                !
 ! R11   R(5,9)                  1.0832         estimate D2E/DX2                !
 ! R12   R(6,10)                 1.0843         estimate D2E/DX2                !
 ! R13   R(11,12)                1.2215         estimate D2E/DX2                !
 ! R14   R(11,14)                1.4937         estimate D2E/DX2                !
 ! R15   R(13,15)                1.4899         estimate D2E/DX2                !
 ! R16   R(13,24)                1.2223         estimate D2E/DX2                !
 ! R17   R(14,15)                1.4051         estimate D2E/DX2                !
 ! R18   R(14,16)                1.3966         estimate D2E/DX2                !
 ! R19   R(15,17)                1.3975         estimate D2E/DX2                !
 ! R20   R(16,18)                1.3877         estimate D2E/DX2                !
 ! R21   R(16,19)                1.082          estimate D2E/DX2                !
 ! R22   R(17,20)                1.3889         estimate D2E/DX2                !
 ! R23   R(17,21)                1.0831         estimate D2E/DX2                !
 ! R24   R(18,20)                1.3959         estimate D2E/DX2                !
 ! R25   R(18,23)                1.9145         estimate D2E/DX2                !
 ! R26   R(20,22)                1.0827         estimate D2E/DX2                !
 ! R27   R(24,25)                0.96           estimate D2E/DX2                !
 ! A1    A(2,1,6)              120.0716         estimate D2E/DX2                !
 ! A2    A(2,1,7)              119.8762         estimate D2E/DX2                !
 ! A3    A(6,1,7)              120.0522         estimate D2E/DX2                !
 ! A4    A(1,2,3)              120.3135         estimate D2E/DX2                !
 ! A5    A(1,2,8)              120.9437         estimate D2E/DX2                !
 ! A6    A(3,2,8)              118.7427         estimate D2E/DX2                !
 ! A7    A(2,3,4)              119.61           estimate D2E/DX2                !
 ! A8    A(2,3,13)             119.0886         estimate D2E/DX2                !
 ! A9    A(4,3,13)             121.3015         estimate D2E/DX2                !
 ! A10   A(3,4,5)              119.6541         estimate D2E/DX2                !
 ! A11   A(3,4,11)             121.2846         estimate D2E/DX2                !
 ! A12   A(5,4,11)             119.0614         estimate D2E/DX2                !
 ! A13   A(4,5,6)              120.2978         estimate D2E/DX2                !
 ! A14   A(4,5,9)              118.781          estimate D2E/DX2                !
 ! A15   A(6,5,9)              120.9213         estimate D2E/DX2                !
 ! A16   A(1,6,5)              120.0531         estimate D2E/DX2                !
 ! A17   A(1,6,10)             120.0576         estimate D2E/DX2                !
 ! A18   A(5,6,10)             119.8893         estimate D2E/DX2                !
 ! A19   A(4,11,12)            121.6253         estimate D2E/DX2                !
 ! A20   A(4,11,14)            117.364          estimate D2E/DX2                !
 ! A21   A(12,11,14)           121.0107         estimate D2E/DX2                !
 ! A22   A(3,13,15)            117.4646         estimate D2E/DX2                !
 ! A23   A(3,13,24)            121.4572         estimate D2E/DX2                !
 ! A24   A(15,13,24)           121.0782         estimate D2E/DX2                !
 ! A25   A(11,14,15)           121.3184         estimate D2E/DX2                !
 ! A26   A(11,14,16)           118.5644         estimate D2E/DX2                !
 ! A27   A(15,14,16)           120.1171         estimate D2E/DX2                !
 ! A28   A(13,15,14)           121.2669         estimate D2E/DX2                !
 ! A29   A(13,15,17)           119.2824         estimate D2E/DX2                !
 ! A30   A(14,15,17)           119.4507         estimate D2E/DX2                !
 ! A31   A(14,16,18)           119.2632         estimate D2E/DX2                !
 ! A32   A(14,16,19)           119.1012         estimate D2E/DX2                !
 ! A33   A(18,16,19)           121.6356         estimate D2E/DX2                !
 ! A34   A(15,17,20)           120.7409         estimate D2E/DX2                !
 ! A35   A(15,17,21)           118.9765         estimate D2E/DX2                !
 ! A36   A(20,17,21)           120.2826         estimate D2E/DX2                !
 ! A37   A(16,18,20)           121.4299         estimate D2E/DX2                !
 ! A38   A(16,18,23)           119.3081         estimate D2E/DX2                !
 ! A39   A(20,18,23)           119.2619         estimate D2E/DX2                !
 ! A40   A(17,20,18)           118.9981         estimate D2E/DX2                !
 ! A41   A(17,20,22)           120.4098         estimate D2E/DX2                !
 ! A42   A(18,20,22)           120.5921         estimate D2E/DX2                !
 ! A43   A(13,24,25)           109.4712         estimate D2E/DX2                !
 ! D1    D(6,1,2,3)              0.0            estimate D2E/DX2                !
 ! D2    D(6,1,2,8)           -179.9991         estimate D2E/DX2                !
 ! D3    D(7,1,2,3)            179.9997         estimate D2E/DX2                !
 ! D4    D(7,1,2,8)              0.0005         estimate D2E/DX2                !
 ! D5    D(2,1,6,5)             -0.0004         estimate D2E/DX2                !
 ! D6    D(2,1,6,10)          -180.0            estimate D2E/DX2                !
 ! D7    D(7,1,6,5)            180.0            estimate D2E/DX2                !
 ! D8    D(7,1,6,10)             0.0004         estimate D2E/DX2                !
 ! D9    D(1,2,3,4)              0.0007         estimate D2E/DX2                !
 ! D10   D(1,2,3,13)          -179.9971         estimate D2E/DX2                !
 ! D11   D(8,2,3,4)            179.9998         estimate D2E/DX2                !
 ! D12   D(8,2,3,13)             0.002          estimate D2E/DX2                !
 ! D13   D(2,3,4,5)             -0.001          estimate D2E/DX2                !
 ! D14   D(2,3,4,11)           179.9967         estimate D2E/DX2                !
 ! D15   D(13,3,4,5)           179.9967         estimate D2E/DX2                !
 ! D16   D(13,3,4,11)           -0.0056         estimate D2E/DX2                !
 ! D17   D(2,3,13,15)         -179.9955         estimate D2E/DX2                !
 ! D18   D(2,3,13,24)           -0.0505         estimate D2E/DX2                !
 ! D19   D(4,3,13,15)            0.0068         estimate D2E/DX2                !
 ! D20   D(4,3,13,24)          179.9517         estimate D2E/DX2                !
 ! D21   D(3,4,5,6)              0.0007         estimate D2E/DX2                !
 ! D22   D(3,4,5,9)            179.9998         estimate D2E/DX2                !
 ! D23   D(11,4,5,6)          -179.9971         estimate D2E/DX2                !
 ! D24   D(11,4,5,9)             0.002          estimate D2E/DX2                !
 ! D25   D(3,4,11,12)          179.9546         estimate D2E/DX2                !
 ! D26   D(3,4,11,14)            0.0039         estimate D2E/DX2                !
 ! D27   D(5,4,11,12)           -0.0476         estimate D2E/DX2                !
 ! D28   D(5,4,11,14)         -179.9983         estimate D2E/DX2                !
 ! D29   D(4,5,6,1)              0.0            estimate D2E/DX2                !
 ! D30   D(4,5,6,10)           179.9996         estimate D2E/DX2                !
 ! D31   D(9,5,6,1)           -179.9991         estimate D2E/DX2                !
 ! D32   D(9,5,6,10)             0.0005         estimate D2E/DX2                !
 ! D33   D(4,11,14,15)          -0.004          estimate D2E/DX2                !
 ! D34   D(4,11,14,16)         179.9983         estimate D2E/DX2                !
 ! D35   D(12,11,14,15)       -179.955          estimate D2E/DX2                !
 ! D36   D(12,11,14,16)          0.0473         estimate D2E/DX2                !
 ! D37   D(3,13,15,14)          -0.0068         estimate D2E/DX2                !
 ! D38   D(3,13,15,17)         179.9955         estimate D2E/DX2                !
 ! D39   D(24,13,15,14)       -179.952          estimate D2E/DX2                !
 ! D40   D(24,13,15,17)          0.0503         estimate D2E/DX2                !
 ! D41   D(3,13,24,25)        -179.9629         estimate D2E/DX2                !
 ! D42   D(15,13,24,25)         -0.0199         estimate D2E/DX2                !
 ! D43   D(11,14,15,13)          0.0056         estimate D2E/DX2                !
 ! D44   D(11,14,15,17)       -179.9967         estimate D2E/DX2                !
 ! D45   D(16,14,15,13)       -179.9967         estimate D2E/DX2                !
 ! D46   D(16,14,15,17)          0.0009         estimate D2E/DX2                !
 ! D47   D(11,14,16,18)        179.9971         estimate D2E/DX2                !
 ! D48   D(11,14,16,19)         -0.002          estimate D2E/DX2                !
 ! D49   D(15,14,16,18)         -0.0006         estimate D2E/DX2                !
 ! D50   D(15,14,16,19)       -179.9998         estimate D2E/DX2                !
 ! D51   D(13,15,17,20)        179.9972         estimate D2E/DX2                !
 ! D52   D(13,15,17,21)         -0.002          estimate D2E/DX2                !
 ! D53   D(14,15,17,20)         -0.0006         estimate D2E/DX2                !
 ! D54   D(14,15,17,21)       -179.9997         estimate D2E/DX2                !
 ! D55   D(14,16,18,20)         -0.0001         estimate D2E/DX2                !
 ! D56   D(14,16,18,23)       -179.9996         estimate D2E/DX2                !
 ! D57   D(19,16,18,20)        179.999          estimate D2E/DX2                !
 ! D58   D(19,16,18,23)         -0.0005         estimate D2E/DX2                !
 ! D59   D(15,17,20,18)         -0.0001         estimate D2E/DX2                !
 ! D60   D(15,17,20,22)       -179.9997         estimate D2E/DX2                !
 ! D61   D(21,17,20,18)        179.999          estimate D2E/DX2                !
 ! D62   D(21,17,20,22)         -0.0005         estimate D2E/DX2                !
 ! D63   D(16,18,20,17)          0.0005         estimate D2E/DX2                !
 ! D64   D(16,18,20,22)       -180.0            estimate D2E/DX2                !
 ! D65   D(23,18,20,17)       -180.0            estimate D2E/DX2                !
 ! D66   D(23,18,20,22)         -0.0005         estimate D2E/DX2                !
 --------------------------------------------------------------------------------
 Trust Radius=3.00D-01 FncErr=1.00D-07 GrdErr=1.00D-06
 Number of steps in this run=    146 maximum allowed number of steps=    150.
 GradGradGradGradGradGradGradGradGradGradGradGradGradGradGradGradGradGrad

                          Input orientation:                          
 ---------------------------------------------------------------------
 Center     Atomic      Atomic             Coordinates (Angstroms)
 Number     Number       Type             X           Y           Z
 ---------------------------------------------------------------------
      1          6           0       -5.092459    0.053994   -0.000003
      2          6           0       -4.057305    0.982453    0.000120
      3          6           0       -2.726668    0.555318    0.000092
      4          6           0       -2.438397   -0.822959   -0.000076
      5          6           0       -3.485792   -1.748553   -0.000191
      6          6           0       -4.806321   -1.313495   -0.000155
      7          1           0       -6.122347    0.393280    0.000025
      8          1           0       -4.262988    2.045942    0.000253
      9          1           0       -3.247908   -2.805296   -0.000323
     10          1           0       -5.613686   -2.037287   -0.000251
     11          6           0       -1.035242   -1.319050   -0.000184
     12          8           0       -0.778071   -2.513152    0.000494
     13          6           0       -1.639333    1.573354    0.000292
     14          6           0        0.054265   -0.297196   -0.000016
     15          6           0       -0.234178    1.077952    0.000151
     16          6           0        1.380467   -0.735047   -0.000077
     17          6           0        0.815765    2.000252    0.000235
     18          6           0        2.404168    0.201883    0.000016
     19          1           0        1.583786   -1.797823   -0.000210
     20          6           0        2.136964    1.571934    0.000167
     21          1           0        0.584661    3.058370    0.000368
     22          1           0        2.946285    2.291192    0.000238
     23         35           0        4.222619   -0.396905   -0.000078
     24          8           0       -1.886312    2.770432   -0.000440
     25          1           0       -1.064545    3.266717   -0.000743
 ---------------------------------------------------------------------
                    Distance matrix (angstroms):
                    1          2          3          4          5
     1  C    0.000000
     2  C    1.390532   0.000000
     3  C    2.418324   1.397512   0.000000
     4  C    2.795191   2.424949   1.408101   0.000000
     5  C    2.414654   2.790165   2.425715   1.397770   0.000000
     6  C    1.397105   2.415037   2.795965   2.418200   1.390350
     7  H    1.084336   2.147446   3.399543   3.879526   3.396891
     8  H    2.157749   1.083196   2.140617   3.399960   3.873271
     9  H    3.402632   3.873263   3.400797   2.141254   1.083187
    10  H    2.155257   3.397227   3.880267   3.399567   2.147394
    11  C    4.283253   3.798655   2.524713   1.488271   2.487904
    12  O    5.020377   4.792977   3.634906   2.369269   2.813604
    13  C    3.772603   2.489127   1.489528   2.526028   3.800589
    14  C    5.158692   4.306101   2.908671   2.547507   3.826022
    15  C    4.965016   3.824320   2.546694   2.910678   4.308378
    16  C    6.520840   5.702558   4.305067   3.819876   4.970681
    17  C    6.220533   4.978225   3.825790   4.308142   5.705868
    18  C    7.498086   6.508450   5.142995   4.949822   6.204501
    19  H    6.928310   6.289026   4.910935   4.138637   5.069817
    20  C    7.387063   6.222255   4.968745   5.164246   6.530009
    21  H    6.423081   5.085005   4.150924   4.919715   6.298817
    22  H    8.344247   7.124821   5.932593   6.220349   7.595469
    23  Br   9.325985   8.394032   7.014223   6.674628   7.826018
    24  O    4.202192   2.812486   2.369162   3.635555   4.793700
    25  H    5.152250   3.764900   3.180305   4.314269   5.569145
                    6          7          8          9         10
     6  C    0.000000
     7  H    2.155227   0.000000
     8  H    3.403091   2.487671   0.000000
     9  H    2.157341   4.300382   4.956299   0.000000
    10  H    1.084303   2.483222   4.300831   2.487317   0.000000
    11  C    3.771083   5.367561   4.662780   2.665486   4.634438
    12  O    4.203091   6.083472   5.738465   2.487055   4.858973
    13  C    4.285290   4.635730   2.665878   4.664771   5.369563
    14  C    4.965698   6.215086   4.912125   4.146675   5.929046
    15  C    5.159798   5.927842   4.143467   4.915504   6.216415
    16  C    6.213771   7.587183   6.291461   5.070285   7.114352
    17  C    6.526007   7.121780   5.078959   6.293388   7.592072
    18  C    7.368007   8.528663   6.917480   6.402272   8.324654
    19  H    6.408435   8.011580   6.997092   4.935612   7.201454
    20  C    7.518970   8.342988   6.417482   6.939524   8.549798
    21  H    6.940885   7.217109   4.952243   7.005081   8.024041
    22  H    8.549659   9.265104   7.213443   8.021360   9.592124
    23  Br   9.075345  10.375101   8.830234   7.849148   9.972149
    24  O    5.020449   4.857452   2.484648   5.739572   6.083377
    25  H    5.914324   5.817044   3.423497   6.452629   6.987642
                   11         12         13         14         15
    11  C    0.000000
    12  O    1.221481   0.000000
    13  C    2.954814   4.176279   0.000000
    14  C    1.493724   2.367117   2.523337   0.000000
    15  C    2.527315   3.632058   1.489927   1.405073   0.000000
    16  C    2.485299   2.796595   3.801040   1.396612   2.427765
    17  C    3.800525   4.786557   2.491937   2.420361   1.397504
    18  C    3.760689   4.183068   4.269758   2.402316   2.779994
    19  H    2.662430   2.467806   4.664047   2.142736   3.402216
    20  C    4.291932   5.018501   3.776297   2.798443   2.422051
    21  H    4.667536   5.735756   2.674214   3.397226   2.143024
    22  H    5.374607   6.078861   4.641464   3.881177   3.404012
    23  Br   5.338113   5.430046   6.184206   4.169546   4.694491
    24  O    4.177102   5.398561   1.222291   3.629901   2.365171
    25  H    4.585861   5.786964   1.788256   3.735400   2.340983
                   16         17         18         19         20
    16  C    0.000000
    17  C    2.792982   0.000000
    18  C    1.387733   2.399407   0.000000
    19  H    1.082050   3.874949   2.161446   0.000000
    20  C    2.427849   1.388893   1.395865   3.414860   0.000000
    21  H    3.875993   1.083062   3.386757   4.957909   2.149218
    22  H    3.407332   2.150293   2.158496   4.310040   1.082743
    23  Br   2.862196   4.165695   1.914500   2.987643   2.868150
    24  O    4.791683   2.809697   5.000566   5.736770   4.197993
    25  H    4.689584   2.267047   4.628734   5.715175   3.622423
                   21         22         23         24         25
    21  H    0.000000
    22  H    2.483109   0.000000
    23  Br   5.017336   2.975717   0.000000
    24  O    2.487693   4.856302   6.881211   0.000000
    25  H    1.662315   4.127761   6.432436   0.960000   0.000000
 Stoichiometry    C14H8BrO2(2)
 Framework group  C1[X(C14H8BrO2)]
 Deg. of freedom    69
 Full point group                 C1      NOp   1
 Largest Abelian subgroup         C1      NOp   1
 Largest concise Abelian subgroup C1      NOp   1
                         Standard orientation:                         
 ---------------------------------------------------------------------
 Center     Atomic      Atomic             Coordinates (Angstroms)
 Number     Number       Type             X           Y           Z
 ---------------------------------------------------------------------
      1          6           0        5.085086    0.015700   -0.000002
      2          6           0        4.052758    0.947300   -0.000125
      3          6           0        2.720829    0.524210   -0.000097
      4          6           0        2.428372   -0.853185    0.000071
      5          6           0        3.472950   -1.781957    0.000186
      6          6           0        4.794794   -1.350914    0.000150
      7          1           0        6.116000    0.351855   -0.000030
      8          1           0        4.261671    2.010159   -0.000258
      9          1           0        3.231856   -2.837973    0.000318
     10          1           0        5.599956   -2.077155    0.000246
     11          6           0        1.023716   -1.345011    0.000179
     12          8           0        0.762918   -2.538326   -0.000499
     13          6           0        1.636592    1.545545   -0.000297
     14          6           0       -0.062681   -0.319851    0.000011
     15          6           0        0.229938    1.054414   -0.000156
     16          6           0       -1.390208   -0.753671    0.000072
     17          6           0       -0.817197    1.979900   -0.000240
     18          6           0       -2.411057    0.186365   -0.000021
     19          1           0       -1.596755   -1.815824    0.000205
     20          6           0       -2.139692    1.555598   -0.000172
     21          1           0       -0.582880    3.037311   -0.000373
     22          1           0       -2.946824    2.277312   -0.000243
     23         35           0       -4.231319   -0.406895    0.000073
     24          8           0        1.887207    2.741867    0.000435
     25          1           0        1.066952    3.240646    0.000738
 ---------------------------------------------------------------------
 Rotational constants (GHZ):      0.9870154      0.1761103      0.1494452
 Standard basis: 6-311G(d) (5D, 7F)
 There are   375 symmetry adapted cartesian basis functions of A   symmetry.
 There are   356 symmetry adapted basis functions of A   symmetry.
   356 basis functions,   642 primitive gaussians,   375 cartesian basis functions
    72 alpha electrons       71 beta electrons
       nuclear repulsion energy      1392.9234315663 Hartrees.
 NAtoms=   25 NActive=   25 NUniq=   25 SFac= 1.00D+00 NAtFMM=   60 NAOKFM=F Big=F
 Integral buffers will be    262144 words long.
 Raffenetti 2 integral format.
 Two-electron integral symmetry is turned on.
 Nuclear repulsion after empirical dispersion term =     1392.8600951505 Hartrees.
 ------------------------------------------------------------------------------
 Polarizable Continuum Model (PCM)
 =================================
 Model                : PCM (using non-symmetric T matrix).
 Atomic radii         : UFF (Universal Force Field).
 Polarization charges : Total charges.
 Charge compensation  : None.
 Solution method      : On-the-fly selection.
 Cavity type          : Scaled VdW (van der Waals Surface) (Alpha=1.100).
 Cavity algorithm     : GePol (No added spheres)
                        Default sphere list used, NSphG=   25.
                        Lebedev-Laikov grids with approx.  5.0 points / Ang**2.
                        Smoothing algorithm: Karplus/York (Gamma=1.0000).
                        Polarization charges: spherical gaussians, with
                                              point-specific exponents (IZeta= 3).
                        Self-potential: point-specific (ISelfS= 7).
                        Self-field    : sphere-specific E.n sum rule (ISelfD= 2).
 1st derivatives      : Analytical E(r).r(x)/FMM algorithm (CHGder, D1EAlg=3).
                        Cavity 1st derivative terms included.
 Solvent              : Acetonitrile, Eps=  35.688000 Eps(inf)=   1.806874
 ------------------------------------------------------------------------------
 One-electron integrals computed using PRISM.
 NBasis=   356 RedAO= T EigKep=  9.45D-05  NBF=   356
 NBsUse=   356 1.00D-06 EigRej= -1.00D+00 NBFU=   356
 ExpMin= 1.03D-01 ExpMax= 4.40D+05 ExpMxC= 1.51D+04 IAcc=2 IRadAn=         4 AccDes= 0.00D+00
 Harris functional with IExCor=  402 and IRadAn=       4 diagonalized for initial guess.
 HarFok:  IExCor=  402 AccDes= 0.00D+00 IRadAn=         4 IDoV= 1 UseB2=F ITyADJ=14
 ICtDFT=  3500011 ScaDFX=  1.000000  1.000000  1.000000  1.000000
 FoFCou: FMM=F IPFlag=           0 FMFlag=      100000 FMFlg1=           0
         NFxFlg=           0 DoJE=T BraDBF=F KetDBF=T FulRan=T
         wScrn=  0.000000 ICntrl=     500 IOpCl=  0 I1Cent=   200000004 NGrid=           0
         NMat0=    1 NMatS0=      1 NMatT0=    0 NMatD0=    1 NMtDS0=    0 NMtDT0=    0
 Petite list used in FoFCou.
 Initial guess <Sx>= 0.0000 <Sy>= 0.0000 <Sz>= 0.5000 <S**2>= 0.7500 S= 0.5000
 Requested convergence on RMS density matrix=1.00D-08 within 128 cycles.
 Requested convergence on MAX density matrix=1.00D-06.
 Requested convergence on             energy=1.00D-06.
 No special actions if energy rises.
 Inv3:  Mode=1 IEnd=    14520000.
 Iteration    1 A*A^-1 deviation from unit magnitude is 2.66D-15 for    335.
 Iteration    1 A*A^-1 deviation from orthogonality  is 3.83D-15 for   1482   1291.
 Iteration    1 A^-1*A deviation from unit magnitude is 2.66D-15 for    961.
 Iteration    1 A^-1*A deviation from orthogonality  is 2.88D-13 for   2076   1482.
 DSYEVD-2 returned Info=       64170 IAlg= 4 N=   356 NDim=   356 NE2=      551065 trying  DSYEV.
 DSYEVD-2 returned Info=       64170 IAlg= 4 N=   356 NDim=   356 NE2=      551065 trying  DSYEV.
 Error on total polarization charges =  0.01444
 SCF Done:  E(UB3LYP) =  -3263.10045529     A.U. after   18 cycles
            NFock= 18  Conv=0.75D-08     -V/T= 2.0017
 <Sx>= 0.0000 <Sy>= 0.0000 <Sz>= 0.5000 <S**2>= 0.7667 S= 0.5083
 <L.S>= 0.000000000000E+00
 Annihilation of the first spin contaminant:
 S**2 before annihilation     0.7667,   after     0.7502

 **********************************************************************

            Population analysis using the SCF density.

 **********************************************************************

 Orbital symmetries:
 Alpha Orbitals:
       Occupied  (A) (A) (A) (A) (A) (A) (A) (A) (A) (A) (A) (A)
                 (A) (A) (A) (A) (A) (A) (A) (A) (A) (A) (A) (A)
                 (A) (A) (A) (A) (A) (A) (A) (A) (A) (A) (A) (A)
                 (A) (A) (A) (A) (A) (A) (A) (A) (A) (A) (A) (A)
                 (A) (A) (A) (A) (A) (A) (A) (A) (A) (A) (A) (A)
                 (A) (A) (A) (A) (A) (A) (A) (A) (A) (A) (A) (A)
       Virtual   (A) (A) (A) (A) (A) (A) (A) (A) (A) (A) (A) (A)
                 (A) (A) (A) (A) (A) (A) (A) (A) (A) (A) (A) (A)
                 (A) (A) (A) (A) (A) (A) (A) (A) (A) (A) (A) (A)
                 (A) (A) (A) (A) (A) (A) (A) (A) (A) (A) (A) (A)
                 (A) (A) (A) (A) (A) (A) (A) (A) (A) (A) (A) (A)
                 (A) (A) (A) (A) (A) (A) (A) (A) (A) (A) (A) (A)
                 (A) (A) (A) (A) (A) (A) (A) (A) (A) (A) (A) (A)
                 (A) (A) (A) (A) (A) (A) (A) (A) (A) (A) (A) (A)
                 (A) (A) (A) (A) (A) (A) (A) (A) (A) (A) (A) (A)
                 (A) (A) (A) (A) (A) (A) (A) (A) (A) (A) (A) (A)
                 (A) (A) (A) (A) (A) (A) (A) (A) (A) (A) (A) (A)
                 (A) (A) (A) (A) (A) (A) (A) (A) (A) (A) (A) (A)
                 (A) (A) (A) (A) (A) (A) (A) (A) (A) (A) (A) (A)
                 (A) (A) (A) (A) (A) (A) (A) (A) (A) (A) (A) (A)
                 (A) (A) (A) (A) (A) (A) (A) (A) (A) (A) (A) (A)
                 (A) (A) (A) (A) (A) (A) (A) (A) (A) (A) (A) (A)
                 (A) (A) (A) (A) (A) (A) (A) (A) (A) (A) (A) (A)
                 (A) (A) (A) (A) (A) (A) (A) (A) (A) (A) (A) (A)
                 (A) (A) (A) (A) (A) (A) (A) (A) (A) (A) (A) (A)
                 (A) (A) (A) (A) (A) (A) (A) (A) (A) (A) (A) (A)
                 (A) (A) (A) (A) (A) (A) (A) (A) (A) (A) (A) (A)
                 (A) (A) (A) (A) (A) (A) (A) (A) (A) (A) (A) (A)
                 (A) (A) (A) (A) (A) (A) (A) (A) (A) (A) (A) (A)
                 (A) (A) (A) (A) (A) (A) (A) (A)
 Beta  Orbitals:
       Occupied  (A) (A) (A) (A) (A) (A) (A) (A) (A) (A) (A) (A)
                 (A) (A) (A) (A) (A) (A) (A) (A) (A) (A) (A) (A)
                 (A) (A) (A) (A) (A) (A) (A) (A) (A) (A) (A) (A)
                 (A) (A) (A) (A) (A) (A) (A) (A) (A) (A) (A) (A)
                 (A) (A) (A) (A) (A) (A) (A) (A) (A) (A) (A) (A)
                 (A) (A) (A) (A) (A) (A) (A) (A) (A) (A) (A)
       Virtual   (A) (A) (A) (A) (A) (A) (A) (A) (A) (A) (A) (A)
                 (A) (A) (A) (A) (A) (A) (A) (A) (A) (A) (A) (A)
                 (A) (A) (A) (A) (A) (A) (A) (A) (A) (A) (A) (A)
                 (A) (A) (A) (A) (A) (A) (A) (A) (A) (A) (A) (A)
                 (A) (A) (A) (A) (A) (A) (A) (A) (A) (A) (A) (A)
                 (A) (A) (A) (A) (A) (A) (A) (A) (A) (A) (A) (A)
                 (A) (A) (A) (A) (A) (A) (A) (A) (A) (A) (A) (A)
                 (A) (A) (A) (A) (A) (A) (A) (A) (A) (A) (A) (A)
                 (A) (A) (A) (A) (A) (A) (A) (A) (A) (A) (A) (A)
                 (A) (A) (A) (A) (A) (A) (A) (A) (A) (A) (A) (A)
                 (A) (A) (A) (A) (A) (A) (A) (A) (A) (A) (A) (A)
                 (A) (A) (A) (A) (A) (A) (A) (A) (A) (A) (A) (A)
                 (A) (A) (A) (A) (A) (A) (A) (A) (A) (A) (A) (A)
                 (A) (A) (A) (A) (A) (A) (A) (A) (A) (A) (A) (A)
                 (A) (A) (A) (A) (A) (A) (A) (A) (A) (A) (A) (A)
                 (A) (A) (A) (A) (A) (A) (A) (A) (A) (A) (A) (A)
                 (A) (A) (A) (A) (A) (A) (A) (A) (A) (A) (A) (A)
                 (A) (A) (A) (A) (A) (A) (A) (A) (A) (A) (A) (A)
                 (A) (A) (A) (A) (A) (A) (A) (A) (A) (A) (A) (A)
                 (A) (A) (A) (A) (A) (A) (A) (A) (A) (A) (A) (A)
                 (A) (A) (A) (A) (A) (A) (A) (A) (A) (A) (A) (A)
                 (A) (A) (A) (A) (A) (A) (A) (A) (A) (A) (A) (A)
                 (A) (A) (A) (A) (A) (A) (A) (A) (A) (A) (A) (A)
                 (A) (A) (A) (A) (A) (A) (A) (A) (A)
 The electronic state is 2-A.
 Alpha  occ. eigenvalues -- -482.83938 -62.49236 -56.31265 -56.30890 -56.30870
 Alpha  occ. eigenvalues --  -19.20405 -19.10267 -10.27602 -10.25800 -10.24539
 Alpha  occ. eigenvalues --  -10.20992 -10.20673 -10.20489 -10.20410 -10.20183
 Alpha  occ. eigenvalues --  -10.20020 -10.19398 -10.18815 -10.18760 -10.18658
 Alpha  occ. eigenvalues --  -10.18554  -8.70207  -6.53337  -6.52077  -6.52031
 Alpha  occ. eigenvalues --   -2.64435  -2.64077  -2.64046  -2.63042  -2.63041
 Alpha  occ. eigenvalues --   -1.17273  -1.04579  -0.90119  -0.88085  -0.83417
 Alpha  occ. eigenvalues --   -0.79939  -0.78326  -0.77269  -0.75237  -0.71366
 Alpha  occ. eigenvalues --   -0.67266  -0.64515  -0.62740  -0.61957  -0.58124
 Alpha  occ. eigenvalues --   -0.56241  -0.54061  -0.49726  -0.49260  -0.48712
 Alpha  occ. eigenvalues --   -0.48286  -0.47503  -0.47131  -0.45006  -0.44215
 Alpha  occ. eigenvalues --   -0.43525  -0.43308  -0.40364  -0.40138  -0.39468
 Alpha  occ. eigenvalues --   -0.38208  -0.37614  -0.36317  -0.35446  -0.33706
 Alpha  occ. eigenvalues --   -0.30385  -0.29355  -0.28408  -0.27447  -0.26484
 Alpha  occ. eigenvalues --   -0.26457  -0.17322
 Alpha virt. eigenvalues --   -0.07652  -0.03793  -0.02321  -0.01743   0.02448
 Alpha virt. eigenvalues --    0.02979   0.04331   0.05702   0.07991   0.08711
 Alpha virt. eigenvalues --    0.09760   0.11659   0.12880   0.12951   0.15870
 Alpha virt. eigenvalues --    0.18991   0.19212   0.21300   0.21761   0.22322
 Alpha virt. eigenvalues --    0.23636   0.24315   0.24844   0.26859   0.27489
 Alpha virt. eigenvalues --    0.28216   0.28254   0.28522   0.28800   0.30654
 Alpha virt. eigenvalues --    0.31231   0.34649   0.34730   0.35378   0.37003
 Alpha virt. eigenvalues --    0.37591   0.37684   0.37850   0.38901   0.39215
 Alpha virt. eigenvalues --    0.40113   0.40540   0.40876   0.41573   0.42648
 Alpha virt. eigenvalues --    0.43175   0.43432   0.43756   0.44883   0.45068
 Alpha virt. eigenvalues --    0.45552   0.45767   0.47786   0.48418   0.48517
 Alpha virt. eigenvalues --    0.51327   0.52434   0.53459   0.55860   0.56682
 Alpha virt. eigenvalues --    0.56985   0.57208   0.58704   0.58810   0.59763
 Alpha virt. eigenvalues --    0.60314   0.60733   0.61599   0.61789   0.62754
 Alpha virt. eigenvalues --    0.63279   0.64241   0.65964   0.66583   0.66895
 Alpha virt. eigenvalues --    0.70312   0.70542   0.71952   0.72006   0.72654
 Alpha virt. eigenvalues --    0.73936   0.75436   0.75906   0.78006   0.79418
 Alpha virt. eigenvalues --    0.80992   0.81396   0.82751   0.83563   0.83675
 Alpha virt. eigenvalues --    0.84819   0.86543   0.88040   0.89649   0.91669
 Alpha virt. eigenvalues --    0.91781   0.92510   0.96656   0.97352   0.97620
 Alpha virt. eigenvalues --    0.98399   0.98693   1.00204   1.00989   1.03291
 Alpha virt. eigenvalues --    1.04453   1.08331   1.09670   1.09915   1.10637
 Alpha virt. eigenvalues --    1.11230   1.12508   1.14789   1.15439   1.16925
 Alpha virt. eigenvalues --    1.18075   1.19478   1.19601   1.20504   1.23331
 Alpha virt. eigenvalues --    1.25047   1.25817   1.26667   1.28979   1.30442
 Alpha virt. eigenvalues --    1.31017   1.38174   1.42503   1.44180   1.45903
 Alpha virt. eigenvalues --    1.47300   1.47321   1.48118   1.49907   1.52426
 Alpha virt. eigenvalues --    1.54011   1.55375   1.57011   1.57300   1.59847
 Alpha virt. eigenvalues --    1.64527   1.65394   1.68835   1.69446   1.72186
 Alpha virt. eigenvalues --    1.74096   1.77765   1.78581   1.79920   1.80631
 Alpha virt. eigenvalues --    1.81969   1.82704   1.83621   1.84175   1.84565
 Alpha virt. eigenvalues --    1.86251   1.88731   1.89085   1.89620   1.90169
 Alpha virt. eigenvalues --    1.91618   1.92291   1.92320   1.94912   1.95841
 Alpha virt. eigenvalues --    1.97544   2.01386   2.03952   2.06007   2.11046
 Alpha virt. eigenvalues --    2.14232   2.15779   2.19326   2.20756   2.25391
 Alpha virt. eigenvalues --    2.26371   2.29093   2.31081   2.31922   2.32818
 Alpha virt. eigenvalues --    2.33920   2.34737   2.35595   2.37421   2.39695
 Alpha virt. eigenvalues --    2.46308   2.46813   2.51529   2.51759   2.54525
 Alpha virt. eigenvalues --    2.55308   2.56988   2.58527   2.65280   2.65932
 Alpha virt. eigenvalues --    2.67986   2.73062   2.73606   2.76019   2.77572
 Alpha virt. eigenvalues --    2.79560   2.81524   2.81952   2.83316   2.87962
 Alpha virt. eigenvalues --    2.89888   2.93309   2.96863   2.96903   3.02193
 Alpha virt. eigenvalues --    3.03877   3.04746   3.05608   3.12653   3.13356
 Alpha virt. eigenvalues --    3.15730   3.19958   3.21289   3.23336   3.25466
 Alpha virt. eigenvalues --    3.26340   3.27688   3.28640   3.30358   3.31013
 Alpha virt. eigenvalues --    3.32558   3.33719   3.36376   3.39519   3.43187
 Alpha virt. eigenvalues --    3.44749   3.46232   3.51563   3.53218   3.55132
 Alpha virt. eigenvalues --    3.57712   3.68264   3.69714   3.76168   3.80828
 Alpha virt. eigenvalues --    3.91765   3.94024   4.10838   4.12969   4.13075
 Alpha virt. eigenvalues --    4.16243   4.20454   4.36065   4.36474   4.53903
 Alpha virt. eigenvalues --    4.72363   4.77664   4.78943   4.79810   4.89514
 Alpha virt. eigenvalues --    5.09745   5.13455   5.61135   5.71234   6.47490
 Alpha virt. eigenvalues --    7.45468   7.52822   7.62539  23.19436  23.33420
 Alpha virt. eigenvalues --   23.78644  23.79842  23.80104  23.83646  23.84786
 Alpha virt. eigenvalues --   23.87859  24.00110  24.02002  24.02771  24.03544
 Alpha virt. eigenvalues --   24.11282  24.13025  47.76585  49.90760  49.99360
 Alpha virt. eigenvalues --  289.65398 289.72673 289.846101020.51456
  Beta  occ. eigenvalues -- -482.83936 -62.49234 -56.31266 -56.30882 -56.30869
  Beta  occ. eigenvalues --  -19.20006 -19.09839 -10.26996 -10.25783 -10.24367
  Beta  occ. eigenvalues --  -10.21059 -10.20575 -10.20520 -10.20495 -10.20105
  Beta  occ. eigenvalues --  -10.20006 -10.19258 -10.18836 -10.18710 -10.18662
  Beta  occ. eigenvalues --  -10.18420  -8.70204  -6.53339  -6.52062  -6.52029
  Beta  occ. eigenvalues --   -2.64435  -2.64070  -2.64047  -2.63034  -2.63034
  Beta  occ. eigenvalues --   -1.16484  -1.03866  -0.89906  -0.87907  -0.83158
  Beta  occ. eigenvalues --   -0.79643  -0.77996  -0.77090  -0.75122  -0.70679
  Beta  occ. eigenvalues --   -0.67126  -0.64141  -0.62493  -0.61855  -0.57867
  Beta  occ. eigenvalues --   -0.56025  -0.53795  -0.49596  -0.48520  -0.48176
  Beta  occ. eigenvalues --   -0.47276  -0.46984  -0.46794  -0.44923  -0.44136
  Beta  occ. eigenvalues --   -0.43263  -0.42071  -0.40149  -0.39606  -0.39353
  Beta  occ. eigenvalues --   -0.38138  -0.36712  -0.36235  -0.35223  -0.33031
  Beta  occ. eigenvalues --   -0.30371  -0.28303  -0.27781  -0.26664  -0.26094
  Beta  occ. eigenvalues --   -0.26071
  Beta virt. eigenvalues --   -0.10879  -0.06572  -0.02873  -0.01927  -0.01570
  Beta virt. eigenvalues --    0.03123   0.04385   0.05370   0.05733   0.08019
  Beta virt. eigenvalues --    0.08730   0.09792   0.11688   0.12991   0.13498
  Beta virt. eigenvalues --    0.15940   0.19592   0.20217   0.21499   0.21930
  Beta virt. eigenvalues --    0.22541   0.23756   0.24472   0.24935   0.26936
  Beta virt. eigenvalues --    0.27552   0.28275   0.28327   0.28607   0.28970
  Beta virt. eigenvalues --    0.30737   0.31537   0.34770   0.35388   0.35597
  Beta virt. eigenvalues --    0.37119   0.37769   0.38036   0.38062   0.39099
  Beta virt. eigenvalues --    0.39701   0.40289   0.40944   0.40969   0.41628
  Beta virt. eigenvalues --    0.42808   0.43342   0.43558   0.43920   0.45027
  Beta virt. eigenvalues --    0.45148   0.45713   0.45878   0.48086   0.48733
  Beta virt. eigenvalues --    0.48845   0.51388   0.52604   0.53845   0.55910
  Beta virt. eigenvalues --    0.56833   0.57079   0.57434   0.58831   0.59239
  Beta virt. eigenvalues --    0.59904   0.60426   0.60850   0.61712   0.62010
  Beta virt. eigenvalues --    0.62803   0.63411   0.64370   0.66287   0.66667
  Beta virt. eigenvalues --    0.67108   0.70468   0.70844   0.72104   0.72313
  Beta virt. eigenvalues --    0.72738   0.74062   0.75569   0.76026   0.78073
  Beta virt. eigenvalues --    0.79559   0.81102   0.81503   0.82956   0.83685
  Beta virt. eigenvalues --    0.84743   0.84934   0.86691   0.88133   0.89809
  Beta virt. eigenvalues --    0.91928   0.92668   0.93177   0.96754   0.97520
  Beta virt. eigenvalues --    0.97920   0.98518   0.98986   1.00456   1.01099
  Beta virt. eigenvalues --    1.03392   1.04555   1.08567   1.10108   1.10476
  Beta virt. eigenvalues --    1.10797   1.11543   1.12620   1.15641   1.15826
  Beta virt. eigenvalues --    1.17254   1.18207   1.19671   1.19779   1.20703
  Beta virt. eigenvalues --    1.23650   1.25394   1.25959   1.26751   1.29127
  Beta virt. eigenvalues --    1.30718   1.31454   1.38259   1.42556   1.44265
  Beta virt. eigenvalues --    1.46037   1.47387   1.47924   1.48187   1.50742
  Beta virt. eigenvalues --    1.52527   1.54585   1.55754   1.57267   1.57610
  Beta virt. eigenvalues --    1.60230   1.64738   1.65873   1.68994   1.69604
  Beta virt. eigenvalues --    1.72451   1.74457   1.78087   1.78776   1.80097
  Beta virt. eigenvalues --    1.80984   1.82376   1.82965   1.83985   1.84320
  Beta virt. eigenvalues --    1.85036   1.86434   1.88944   1.89385   1.89939
  Beta virt. eigenvalues --    1.90440   1.91802   1.92496   1.92568   1.94975
  Beta virt. eigenvalues --    1.96034   1.97634   2.01885   2.04068   2.06104
  Beta virt. eigenvalues --    2.11161   2.14325   2.16243   2.19494   2.21056
  Beta virt. eigenvalues --    2.25510   2.26420   2.29155   2.31242   2.32121
  Beta virt. eigenvalues --    2.33140   2.34266   2.34847   2.35919   2.37553
  Beta virt. eigenvalues --    2.39766   2.46361   2.47647   2.51617   2.52039
  Beta virt. eigenvalues --    2.54674   2.55416   2.57684   2.59362   2.65616
  Beta virt. eigenvalues --    2.66063   2.68380   2.73168   2.74087   2.76926
  Beta virt. eigenvalues --    2.77607   2.79975   2.82265   2.82431   2.83401
  Beta virt. eigenvalues --    2.88357   2.90853   2.94326   2.97088   2.97455
  Beta virt. eigenvalues --    3.02428   3.04196   3.05176   3.06053   3.12902
  Beta virt. eigenvalues --    3.13551   3.15989   3.20083   3.21494   3.24786
  Beta virt. eigenvalues --    3.25576   3.26407   3.27751   3.28682   3.30430
  Beta virt. eigenvalues --    3.31388   3.33651   3.33833   3.36438   3.39642
  Beta virt. eigenvalues --    3.43437   3.44896   3.46357   3.51738   3.53431
  Beta virt. eigenvalues --    3.55289   3.57955   3.68550   3.69820   3.76340
  Beta virt. eigenvalues --    3.81038   3.91897   3.94162   4.11075   4.12990
  Beta virt. eigenvalues --    4.13332   4.16286   4.20475   4.36217   4.36696
  Beta virt. eigenvalues --    4.53923   4.72834   4.77823   4.79063   4.81497
  Beta virt. eigenvalues --    4.91327   5.10098   5.13791   5.61608   5.71668
  Beta virt. eigenvalues --    6.47503   7.45500   7.52827   7.62538  23.19495
  Beta virt. eigenvalues --   23.33474  23.78704  23.79936  23.80149  23.83739
  Beta virt. eigenvalues --   23.84998  23.88275  24.00160  24.02044  24.02816
  Beta virt. eigenvalues --   24.03589  24.11331  24.13070  47.76589  49.91153
  Beta virt. eigenvalues --   49.99788 289.65408 289.72675 289.846081020.51457
          Condensed to atoms (all electrons):
               1          2          3          4          5          6
     1  C    4.965977   0.525294  -0.031040  -0.051226  -0.032072   0.486119
     2  C    0.525294   5.076613   0.423237  -0.070395  -0.056727  -0.043872
     3  C   -0.031040   0.423237   5.157431   0.492415  -0.096651  -0.040814
     4  C   -0.051226  -0.070395   0.492415   5.541389   0.367106  -0.034677
     5  C   -0.032072  -0.056727  -0.096651   0.367106   5.146099   0.494057
     6  C    0.486119  -0.043872  -0.040814  -0.034677   0.494057   5.004679
     7  H    0.400360  -0.042197   0.005898   0.000430   0.005930  -0.042825
     8  H   -0.040368   0.403788  -0.051623   0.005764  -0.000507   0.006115
     9  H    0.006773  -0.000811   0.004825  -0.069684   0.403039  -0.039358
    10  H   -0.043635   0.006248   0.000407   0.007182  -0.043096   0.400601
    11  C   -0.001346   0.006473   0.006746   0.227354  -0.073393   0.011413
    12  O   -0.000004  -0.000038   0.005543  -0.163598   0.023217   0.001307
    13  C    0.009991  -0.070761   0.386142  -0.035078   0.016495  -0.001522
    14  C    0.000325  -0.002406  -0.092342  -0.069635   0.035405  -0.000589
    15  C   -0.000504   0.020376  -0.077800  -0.102575  -0.004319   0.000283
    16  C    0.000004   0.000088  -0.003004   0.033981  -0.001315  -0.000010
    17  C    0.000001  -0.001236   0.016533  -0.001313   0.000043   0.000002
    18  C    0.000000   0.000004   0.000290  -0.000487  -0.000019   0.000000
    19  H    0.000001   0.000001  -0.000262   0.004754  -0.000218  -0.000004
    20  C    0.000000  -0.000009  -0.000226   0.000357   0.000005   0.000000
    21  H    0.000000  -0.000106   0.001965  -0.000022  -0.000008   0.000000
    22  H    0.000000   0.000000  -0.000004   0.000006   0.000000   0.000000
    23  Br   0.000000   0.000000   0.000001  -0.000003   0.000000   0.000000
    24  O    0.000193   0.015707  -0.089937   0.003465  -0.000084   0.000018
    25  H    0.000058  -0.000556   0.004626  -0.000319   0.000048  -0.000004
               7          8          9         10         11         12
     1  C    0.400360  -0.040368   0.006773  -0.043635  -0.001346  -0.000004
     2  C   -0.042197   0.403788  -0.000811   0.006248   0.006473  -0.000038
     3  C    0.005898  -0.051623   0.004825   0.000407   0.006746   0.005543
     4  C    0.000430   0.005764  -0.069684   0.007182   0.227354  -0.163598
     5  C    0.005930  -0.000507   0.403039  -0.043096  -0.073393   0.023217
     6  C   -0.042825   0.006115  -0.039358   0.400601   0.011413   0.001307
     7  H    0.465186  -0.005540  -0.000272  -0.005965   0.000045   0.000000
     8  H   -0.005540   0.466251   0.000084  -0.000301  -0.000090   0.000004
     9  H   -0.000272   0.000084   0.471062  -0.006238  -0.009771   0.025040
    10  H   -0.005965  -0.000301  -0.006238   0.467376  -0.000393  -0.000045
    11  C    0.000045  -0.000090  -0.009771  -0.000393   4.745827   0.760248
    12  O    0.000000   0.000004   0.025040  -0.000045   0.760248   7.822709
    13  C   -0.000458  -0.014596  -0.000083   0.000038  -0.050072  -0.001330
    14  C    0.000006  -0.000099   0.004568  -0.000018   0.187308  -0.171462
    15  C   -0.000008   0.001967  -0.000180   0.000006   0.006176   0.006132
    16  C    0.000000  -0.000003  -0.000226   0.000000  -0.058656   0.025248
    17  C    0.000000  -0.000083   0.000003   0.000000   0.006770  -0.000031
    18  C    0.000000   0.000001  -0.000006   0.000000   0.012674   0.002108
    19  H    0.000000  -0.000001  -0.000103   0.000000  -0.009640   0.027485
    20  C    0.000000  -0.000002   0.000000   0.000000  -0.001245   0.000012
    21  H    0.000000  -0.000030  -0.000001   0.000000  -0.000075   0.000005
    22  H    0.000000   0.000000   0.000000   0.000000   0.000028   0.000000
    23  Br   0.000000   0.000000   0.000000   0.000000  -0.000355  -0.000001
    24  O   -0.000029   0.010967   0.000001   0.000000   0.000178   0.000000
    25  H   -0.000002  -0.000522  -0.000001   0.000000  -0.000171  -0.000001
              13         14         15         16         17         18
     1  C    0.009991   0.000325  -0.000504   0.000004   0.000001   0.000000
     2  C   -0.070761  -0.002406   0.020376   0.000088  -0.001236   0.000004
     3  C    0.386142  -0.092342  -0.077800  -0.003004   0.016533   0.000290
     4  C   -0.035078  -0.069635  -0.102575   0.033981  -0.001313  -0.000487
     5  C    0.016495   0.035405  -0.004319  -0.001315   0.000043  -0.000019
     6  C   -0.001522  -0.000589   0.000283  -0.000010   0.000002   0.000000
     7  H   -0.000458   0.000006  -0.000008   0.000000   0.000000   0.000000
     8  H   -0.014596  -0.000099   0.001967  -0.000003  -0.000083   0.000001
     9  H   -0.000083   0.004568  -0.000180  -0.000226   0.000003  -0.000006
    10  H    0.000038  -0.000018   0.000006   0.000000   0.000000   0.000000
    11  C   -0.050072   0.187308   0.006176  -0.058656   0.006770   0.012674
    12  O   -0.001330  -0.171462   0.006132   0.025248  -0.000031   0.002108
    13  C    4.911930   0.013558   0.286905   0.011241  -0.041425  -0.000638
    14  C    0.013558   5.539795   0.468620   0.350187  -0.031819  -0.027633
    15  C    0.286905   0.468620   5.404352  -0.101334   0.348990  -0.043400
    16  C    0.011241   0.350187  -0.101334   5.217350  -0.058366   0.434565
    17  C   -0.041425  -0.031819   0.348990  -0.058366   5.114548  -0.037871
    18  C   -0.000638  -0.027633  -0.043400   0.434565  -0.037871   5.151062
    19  H    0.000119  -0.067693   0.005572   0.400450  -0.001662  -0.046685
    20  C    0.008279  -0.047434  -0.034571  -0.032915   0.536213   0.452015
    21  H    0.007261   0.002188  -0.089645  -0.000030   0.392720   0.005569
    22  H   -0.000367  -0.000146   0.006257   0.006210  -0.035358  -0.050066
    23  Br  -0.000004   0.010268  -0.000467  -0.089897   0.009602   0.281366
    24  O    0.361778   0.003140  -0.074387  -0.000105  -0.004371  -0.000036
    25  H   -0.063106   0.001289  -0.016289   0.000027   0.018106   0.000002
              19         20         21         22         23         24
     1  C    0.000001   0.000000   0.000000   0.000000   0.000000   0.000193
     2  C    0.000001  -0.000009  -0.000106   0.000000   0.000000   0.015707
     3  C   -0.000262  -0.000226   0.001965  -0.000004   0.000001  -0.089937
     4  C    0.004754   0.000357  -0.000022   0.000006  -0.000003   0.003465
     5  C   -0.000218   0.000005  -0.000008   0.000000   0.000000  -0.000084
     6  C   -0.000004   0.000000   0.000000   0.000000   0.000000   0.000018
     7  H    0.000000   0.000000   0.000000   0.000000   0.000000  -0.000029
     8  H   -0.000001  -0.000002  -0.000030   0.000000   0.000000   0.010967
     9  H   -0.000103   0.000000  -0.000001   0.000000   0.000000   0.000001
    10  H    0.000000   0.000000   0.000000   0.000000   0.000000   0.000000
    11  C   -0.009640  -0.001245  -0.000075   0.000028  -0.000355   0.000178
    12  O    0.027485   0.000012   0.000005   0.000000  -0.000001   0.000000
    13  C    0.000119   0.008279   0.007261  -0.000367  -0.000004   0.361778
    14  C   -0.067693  -0.047434   0.002188  -0.000146   0.010268   0.003140
    15  C    0.005572  -0.034571  -0.089645   0.006257  -0.000467  -0.074387
    16  C    0.400450  -0.032915  -0.000030   0.006210  -0.089897  -0.000105
    17  C   -0.001662   0.536213   0.392720  -0.035358   0.009602  -0.004371
    18  C   -0.046685   0.452015   0.005569  -0.050066   0.281366  -0.000036
    19  H    0.455775   0.007649   0.000086  -0.000153  -0.004814   0.000002
    20  C    0.007649   4.961471  -0.012046   0.399918  -0.078872   0.001381
    21  H    0.000086  -0.012046   0.475829  -0.005634  -0.000261  -0.004048
    22  H   -0.000153   0.399918  -0.005634   0.443790  -0.004504   0.000005
    23  Br  -0.004814  -0.078872  -0.000261  -0.004504  34.910291   0.000000
    24  O    0.000002   0.001381  -0.004048   0.000005   0.000000   7.929299
    25  H    0.000001   0.000535   0.014855   0.000042  -0.000001   0.288139
              25
     1  C    0.000058
     2  C   -0.000556
     3  C    0.004626
     4  C   -0.000319
     5  C    0.000048
     6  C   -0.000004
     7  H   -0.000002
     8  H   -0.000522
     9  H   -0.000001
    10  H    0.000000
    11  C   -0.000171
    12  O   -0.000001
    13  C   -0.063106
    14  C    0.001289
    15  C   -0.016289
    16  C    0.000027
    17  C    0.018106
    18  C    0.000002
    19  H    0.000001
    20  C    0.000535
    21  H    0.014855
    22  H    0.000042
    23  Br  -0.000001
    24  O    0.288139
    25  H    0.317455
          Atomic-Atomic Spin Densities.
               1          2          3          4          5          6
     1  C   -0.044588   0.015619  -0.002190   0.002870  -0.001474  -0.013008
     2  C    0.015619   0.110677  -0.014122   0.007363  -0.000074  -0.007596
     3  C   -0.002190  -0.014122  -0.066954  -0.020915   0.003956   0.002884
     4  C    0.002870   0.007363  -0.020915   0.125700  -0.011720  -0.008293
     5  C   -0.001474  -0.000074   0.003956  -0.011720  -0.046939   0.014327
     6  C   -0.013008  -0.007596   0.002884  -0.008293   0.014327   0.114769
     7  H    0.000513  -0.000274   0.000059  -0.000030   0.000014  -0.000077
     8  H    0.000538  -0.000874   0.000950  -0.000069   0.000030  -0.000054
     9  H   -0.000036   0.000039  -0.000027   0.001192   0.000502  -0.000346
    10  H    0.000206  -0.000019  -0.000045   0.000018  -0.000161  -0.000448
    11  C    0.000070   0.000080  -0.001162   0.025387   0.000111  -0.000483
    12  O   -0.000003  -0.000006   0.000230  -0.005453   0.000723   0.000046
    13  C   -0.000732  -0.012362   0.036965  -0.013078   0.000086   0.000383
    14  C    0.000012   0.000033  -0.001528   0.003232  -0.000412  -0.000035
    15  C    0.000011  -0.000546  -0.002391  -0.001534  -0.000084   0.000015
    16  C    0.000000  -0.000013  -0.000182  -0.000258   0.000061   0.000000
    17  C    0.000000   0.000084  -0.000382   0.000057  -0.000010   0.000000
    18  C    0.000000   0.000000   0.000016  -0.000041   0.000000   0.000000
    19  H    0.000000   0.000000  -0.000005  -0.000057   0.000010   0.000000
    20  C    0.000000   0.000000  -0.000002   0.000015   0.000000   0.000000
    21  H    0.000000   0.000006  -0.000041  -0.000005   0.000000   0.000000
    22  H    0.000000   0.000000   0.000001   0.000000   0.000000   0.000000
    23  Br   0.000000   0.000000   0.000000   0.000001   0.000000   0.000000
    24  O    0.000026   0.002725  -0.002695   0.000428  -0.000005  -0.000007
    25  H   -0.000003   0.000004  -0.000006  -0.000019  -0.000002   0.000000
               7          8          9         10         11         12
     1  C    0.000513   0.000538  -0.000036   0.000206   0.000070  -0.000003
     2  C   -0.000274  -0.000874   0.000039  -0.000019   0.000080  -0.000006
     3  C    0.000059   0.000950  -0.000027  -0.000045  -0.001162   0.000230
     4  C   -0.000030  -0.000069   0.001192   0.000018   0.025387  -0.005453
     5  C    0.000014   0.000030   0.000502  -0.000161   0.000111   0.000723
     6  C   -0.000077  -0.000054  -0.000346  -0.000448  -0.000483   0.000046
     7  H    0.001299   0.000024  -0.000001   0.000056  -0.000001   0.000000
     8  H    0.000024  -0.005501  -0.000001   0.000004  -0.000003   0.000000
     9  H   -0.000001  -0.000001   0.000558   0.000062   0.000106  -0.000513
    10  H    0.000056   0.000004   0.000062  -0.005407   0.000007   0.000001
    11  C   -0.000001  -0.000003   0.000106   0.000007  -0.001560  -0.031406
    12  O    0.000000   0.000000  -0.000513   0.000001  -0.031406   0.194515
    13  C   -0.000003   0.000063  -0.000016   0.000000  -0.001555   0.000124
    14  C    0.000000  -0.000010  -0.000058   0.000000   0.025724  -0.006080
    15  C    0.000001  -0.000049  -0.000005   0.000000  -0.001829   0.000301
    16  C    0.000000   0.000000   0.000009   0.000000  -0.000205   0.000601
    17  C    0.000000   0.000007   0.000000   0.000000   0.000142  -0.000006
    18  C    0.000000   0.000000   0.000000   0.000000  -0.000460   0.000039
    19  H    0.000000   0.000000   0.000005   0.000000   0.000076  -0.000562
    20  C    0.000000   0.000000   0.000000   0.000000   0.000031  -0.000003
    21  H    0.000000   0.000002   0.000000   0.000000  -0.000005   0.000000
    22  H    0.000000   0.000000   0.000000   0.000000  -0.000001   0.000000
    23  Br   0.000000   0.000000   0.000000   0.000000   0.000013  -0.000003
    24  O    0.000000  -0.000133   0.000000   0.000000   0.000046   0.000000
    25  H    0.000000   0.000014   0.000000   0.000000   0.000010   0.000000
              13         14         15         16         17         18
     1  C   -0.000732   0.000012   0.000011   0.000000   0.000000   0.000000
     2  C   -0.012362   0.000033  -0.000546  -0.000013   0.000084   0.000000
     3  C    0.036965  -0.001528  -0.002391  -0.000182  -0.000382   0.000016
     4  C   -0.013078   0.003232  -0.001534  -0.000258   0.000057  -0.000041
     5  C    0.000086  -0.000412  -0.000084   0.000061  -0.000010   0.000000
     6  C    0.000383  -0.000035   0.000015   0.000000   0.000000   0.000000
     7  H   -0.000003   0.000000   0.000001   0.000000   0.000000   0.000000
     8  H    0.000063  -0.000010  -0.000049   0.000000   0.000007   0.000000
     9  H   -0.000016  -0.000058  -0.000005   0.000009   0.000000   0.000000
    10  H    0.000000   0.000000   0.000000   0.000000   0.000000   0.000000
    11  C   -0.001555   0.025724  -0.001829  -0.000205   0.000142  -0.000460
    12  O    0.000124  -0.006080   0.000301   0.000601  -0.000006   0.000039
    13  C    0.469466  -0.012918   0.046125   0.000261  -0.013598   0.000407
    14  C   -0.012918   0.153877  -0.031018  -0.010345   0.008639  -0.009005
    15  C    0.046125  -0.031018  -0.047009   0.004570  -0.020540   0.003154
    16  C    0.000261  -0.010345   0.004570  -0.060658  -0.000431   0.013157
    17  C   -0.013598   0.008639  -0.020540  -0.000431   0.114633  -0.008105
    18  C    0.000407  -0.009005   0.003154   0.013157  -0.008105   0.135656
    19  H   -0.000017   0.001309   0.000002   0.000772   0.000041  -0.000426
    20  C   -0.000794   0.002387  -0.001282  -0.000448   0.015409  -0.014124
    21  H   -0.000074  -0.000016   0.001050   0.000010  -0.000596  -0.000028
    22  H   -0.000003  -0.000030   0.000076   0.000013  -0.000299  -0.000071
    23  Br  -0.000003   0.000344  -0.000097  -0.000561   0.000237  -0.011957
    24  O   -0.103398   0.000595  -0.003176  -0.000002   0.002801  -0.000008
    25  H    0.000222   0.000006   0.000219   0.000003  -0.000023  -0.000004
              19         20         21         22         23         24
     1  C    0.000000   0.000000   0.000000   0.000000   0.000000   0.000026
     2  C    0.000000   0.000000   0.000006   0.000000   0.000000   0.002725
     3  C   -0.000005  -0.000002  -0.000041   0.000001   0.000000  -0.002695
     4  C   -0.000057   0.000015  -0.000005   0.000000   0.000001   0.000428
     5  C    0.000010   0.000000   0.000000   0.000000   0.000000  -0.000005
     6  C    0.000000   0.000000   0.000000   0.000000   0.000000  -0.000007
     7  H    0.000000   0.000000   0.000000   0.000000   0.000000   0.000000
     8  H    0.000000   0.000000   0.000002   0.000000   0.000000  -0.000133
     9  H    0.000005   0.000000   0.000000   0.000000   0.000000   0.000000
    10  H    0.000000   0.000000   0.000000   0.000000   0.000000   0.000000
    11  C    0.000076   0.000031  -0.000005  -0.000001   0.000013   0.000046
    12  O   -0.000562  -0.000003   0.000000   0.000000  -0.000003   0.000000
    13  C   -0.000017  -0.000794  -0.000074  -0.000003  -0.000003  -0.103398
    14  C    0.001309   0.002387  -0.000016  -0.000030   0.000344   0.000595
    15  C    0.000002  -0.001282   0.001050   0.000076  -0.000097  -0.003176
    16  C    0.000772  -0.000448   0.000010   0.000013  -0.000561  -0.000002
    17  C    0.000041   0.015409  -0.000596  -0.000299   0.000237   0.002801
    18  C   -0.000426  -0.014124  -0.000028  -0.000071  -0.011957  -0.000008
    19  H    0.000827  -0.000063  -0.000001  -0.000001   0.000041   0.000000
    20  C   -0.000063  -0.048071   0.000259   0.000597   0.001708   0.000029
    21  H   -0.000001   0.000259  -0.005295   0.000021   0.000002   0.000177
    22  H   -0.000001   0.000597   0.000021   0.001395   0.000041   0.000000
    23  Br   0.000041   0.001708   0.000002   0.000041   0.016050   0.000000
    24  O    0.000000   0.000029   0.000177   0.000000   0.000000   0.214845
    25  H    0.000000   0.000049  -0.000203   0.000001   0.000000  -0.001732
              25
     1  C   -0.000003
     2  C    0.000004
     3  C   -0.000006
     4  C   -0.000019
     5  C   -0.000002
     6  C    0.000000
     7  H    0.000000
     8  H    0.000014
     9  H    0.000000
    10  H    0.000000
    11  C    0.000010
    12  O    0.000000
    13  C    0.000222
    14  C    0.000006
    15  C    0.000219
    16  C    0.000003
    17  C   -0.000023
    18  C   -0.000004
    19  H    0.000000
    20  C    0.000049
    21  H   -0.000203
    22  H    0.000001
    23  Br   0.000000
    24  O   -0.001732
    25  H   -0.003084
 Mulliken charges and spin densities:
               1          2
     1  C   -0.194902  -0.042169
     2  C   -0.188716   0.100746
     3  C   -0.022356  -0.067586
     4  C   -0.085191   0.104789
     5  C   -0.183035  -0.041061
     6  C   -0.200920   0.102075
     7  H    0.219441   0.001580
     8  H    0.218826  -0.005062
     9  H    0.211339   0.001469
    10  H    0.217833  -0.005727
    11  C    0.233966   0.013135
    12  O   -0.362548   0.152543
    13  C    0.265700   0.395551
    14  C   -0.105379   0.124704
    15  C   -0.010156  -0.054036
    16  C   -0.133489  -0.053646
    17  C   -0.229995   0.098059
    18  C   -0.132814   0.108201
    19  H    0.229341   0.001950
    20  C   -0.160517  -0.044305
    21  H    0.211430  -0.004735
    22  H    0.239977   0.001738
    23  Br  -0.032350   0.005816
    24  O   -0.441276   0.110517
    25  H    0.435790  -0.004547
 Sum of Mulliken charges =   0.00000   1.00000
 Mulliken charges and spin densities with hydrogens summed into heavy atoms:
               1          2
     1  C    0.024539  -0.040589
     2  C    0.030111   0.095684
     3  C   -0.022356  -0.067586
     4  C   -0.085191   0.104789
     5  C    0.028304  -0.039592
     6  C    0.016913   0.096348
    11  C    0.233966   0.013135
    12  O   -0.362548   0.152543
    13  C    0.265700   0.395551
    14  C   -0.105379   0.124704
    15  C   -0.010156  -0.054036
    16  C    0.095851  -0.051696
    17  C   -0.018564   0.093323
    18  C   -0.132814   0.108201
    20  C    0.079460  -0.042566
    23  Br  -0.032350   0.005816
    24  O   -0.005486   0.105969
 Electronic spatial extent (au):  <R**2>=           6275.4544
 Charge=              0.0000 electrons
 Dipole moment (field-independent basis, Debye):
    X=              2.0509    Y=              7.3335    Z=              0.0018  Tot=              7.6148
 Quadrupole moment (field-independent basis, Debye-Ang):
   XX=            -98.9555   YY=           -100.3156   ZZ=           -113.9862
   XY=             -1.5583   XZ=              0.0011   YZ=             -0.0028
 Traceless Quadrupole moment (field-independent basis, Debye-Ang):
   XX=              5.4636   YY=              4.1035   ZZ=             -9.5671
   XY=             -1.5583   XZ=              0.0011   YZ=             -0.0028
 Octapole moment (field-independent basis, Debye-Ang**2):
  XXX=            -25.4291  YYY=             69.0910  ZZZ=              0.0042  XYY=            -43.4060
  XXY=            -10.1497  XXZ=              0.0004  XZZ=            -51.2878  YZZ=             -3.3083
  YYZ=              0.0182  XYZ=             -0.0048
 Hexadecapole moment (field-independent basis, Debye-Ang**3):
 XXXX=          -5378.3853 YYYY=          -1241.0764 ZZZZ=           -125.7855 XXXY=             10.0743
 XXXZ=             -0.0081 YYYX=             53.7209 YYYZ=              0.0025 ZZZX=             -0.0105
 ZZZY=              0.0096 XXYY=          -1146.1766 XXZZ=          -1104.0102 YYZZ=           -257.2652
 XXYZ=             -0.0294 YYXZ=              0.0130 ZZXY=             32.2451
 N-N= 1.392860095151D+03 E-N=-1.054400333867D+04  KE= 3.257662956073D+03
                          Isotropic Fermi Contact Couplings
        Atom                 a.u.       MegaHertz       Gauss      10(-4) cm-1
     1  C(13)             -0.00659      -7.40732      -2.64311      -2.47081
     2  C(13)              0.00586       6.58260       2.34884       2.19572
     3  C(13)             -0.01726     -19.40486      -6.92414      -6.47276
     4  C(13)              0.00488       5.48393       1.95680       1.82924
     5  C(13)             -0.00723      -8.12712      -2.89996      -2.71092
     6  C(13)              0.00658       7.39497       2.63871       2.46670
     7  H(1)               0.00041       1.84231       0.65738       0.61453
     8  H(1)              -0.00141      -6.31913      -2.25482      -2.10784
     9  H(1)               0.00044       1.95585       0.69790       0.65240
    10  H(1)              -0.00150      -6.69781      -2.38994      -2.23415
    11  C(13)             -0.00950     -10.67487      -3.80906      -3.56075
    12  O(17)              0.01430      -8.66714      -3.09265      -2.89105
    13  C(13)              0.02201      24.74364       8.82915       8.25359
    14  C(13)              0.00581       6.53607       2.33223       2.18020
    15  C(13)             -0.01680     -18.88396      -6.73827      -6.29901
    16  C(13)             -0.00851      -9.56697      -3.41373      -3.19120
    17  C(13)              0.00567       6.37920       2.27626       2.12787
    18  C(13)              0.01008      11.33195       4.04352       3.77993
    19  H(1)               0.00060       2.67435       0.95427       0.89207
    20  C(13)             -0.00716      -8.05418      -2.87393      -2.68659
    21  H(1)              -0.00138      -6.16513      -2.19987      -2.05647
    22  H(1)               0.00047       2.11374       0.75423       0.70507
    23  Br(79)             0.00198       2.22874       0.79527       0.74343
    24  O(17)              0.01632      -9.89057      -3.52920      -3.29914
    25  H(1)              -0.00207      -9.26367      -3.30551      -3.09003
 --------------------------------------------------------
       Center         ----  Spin Dipole Couplings  ----
                      3XX-RR        3YY-RR        3ZZ-RR
 --------------------------------------------------------
     1   Atom        0.016559      0.018188     -0.034747
     2   Atom       -0.046758     -0.051717      0.098475
     3   Atom        0.021560      0.018627     -0.040186
     4   Atom       -0.055826     -0.056789      0.112615
     5   Atom        0.023514      0.015408     -0.038922
     6   Atom       -0.054424     -0.055957      0.110381
     7   Atom        0.001387      0.000557     -0.001944
     8   Atom       -0.000021      0.003882     -0.003860
     9   Atom        0.004697     -0.001433     -0.003265
    10   Atom        0.002732     -0.001497     -0.001235
    11   Atom       -0.026436     -0.005022      0.031457
    12   Atom       -0.327992     -0.330579      0.658571
    13   Atom       -0.250682     -0.248989      0.499671
    14   Atom       -0.066216     -0.067737      0.133953
    15   Atom        0.016977      0.008664     -0.025641
    16   Atom        0.029266      0.020736     -0.050002
    17   Atom       -0.045657     -0.052086      0.097743
    18   Atom       -0.063152     -0.070057      0.133210
    19   Atom        0.005587     -0.002082     -0.003505
    20   Atom        0.020377      0.018770     -0.039147
    21   Atom       -0.001191      0.005064     -0.003872
    22   Atom        0.002490     -0.000471     -0.002018
    23   Atom       -0.117291     -0.054732      0.172024
    24   Atom       -0.327495     -0.319921      0.647416
    25   Atom        0.011686      0.001377     -0.013063
 --------------------------------------------------------
                        XY            XZ            YZ
 --------------------------------------------------------
     1   Atom       -0.002094      0.000002     -0.000011
     2   Atom       -0.002039      0.000020      0.000025
     3   Atom       -0.004286     -0.000030      0.000051
     4   Atom       -0.001299      0.000056      0.000093
     5   Atom       -0.001606     -0.000004      0.000003
     6   Atom       -0.002693     -0.000010      0.000012
     7   Atom       -0.001802      0.000001      0.000000
     8   Atom        0.002214      0.000001     -0.000001
     9   Atom       -0.001619      0.000001     -0.000001
    10   Atom       -0.007837      0.000001      0.000000
    11   Atom        0.004549     -0.000001      0.000003
    12   Atom       -0.000498     -0.000143     -0.000619
    13   Atom        0.001270     -0.000060     -0.000227
    14   Atom        0.000505     -0.000028      0.000117
    15   Atom        0.002808      0.000050      0.000039
    16   Atom       -0.001968      0.000004     -0.000004
    17   Atom       -0.000836     -0.000018      0.000029
    18   Atom        0.001844      0.000008      0.000013
    19   Atom       -0.001139     -0.000001     -0.000001
    20   Atom        0.002036     -0.000002     -0.000009
    21   Atom       -0.000207     -0.000001      0.000000
    22   Atom        0.001082     -0.000001      0.000000
    23   Atom       -0.021597      0.000003      0.000033
    24   Atom       -0.003761     -0.000023     -0.000577
    25   Atom       -0.022847     -0.000016      0.000012
 --------------------------------------------------------


 ---------------------------------------------------------------------------------
              Anisotropic Spin Dipole Couplings in Principal Axis System
 ---------------------------------------------------------------------------------

       Atom             a.u.   MegaHertz   Gauss  10(-4) cm-1        Axes

              Baa    -0.0347    -4.663    -1.664    -1.555  0.0000  0.0002  1.0000
     1 C(13)  Bbb     0.0151     2.030     0.724     0.677  0.8254  0.5646 -0.0001
              Bcc     0.0196     2.633     0.939     0.878 -0.5646  0.8254 -0.0002
 
              Baa    -0.0524    -7.038    -2.511    -2.348  0.3374  0.9414 -0.0002
     2 C(13)  Bbb    -0.0460    -6.176    -2.204    -2.060  0.9414 -0.3374 -0.0001
              Bcc     0.0985    13.214     4.715     4.408  0.0001  0.0002  1.0000
 
              Baa    -0.0402    -5.393    -1.924    -1.799  0.0004 -0.0008  1.0000
     3 C(13)  Bbb     0.0156     2.088     0.745     0.697  0.5815  0.8136  0.0004
              Bcc     0.0246     3.304     1.179     1.102  0.8136 -0.5815 -0.0008
 
              Baa    -0.0577    -7.742    -2.763    -2.582  0.5712  0.8208 -0.0006
     4 C(13)  Bbb    -0.0549    -7.370    -2.630    -2.458  0.8208 -0.5712  0.0000
              Bcc     0.1126    15.112     5.392     5.041  0.0003  0.0005  1.0000
 
              Baa    -0.0389    -5.223    -1.864    -1.742  0.0001 -0.0001  1.0000
     5 C(13)  Bbb     0.0151     2.026     0.723     0.676  0.1875  0.9823  0.0000
              Bcc     0.0238     3.196     1.141     1.066  0.9823 -0.1875 -0.0001
 
              Baa    -0.0580    -7.782    -2.777    -2.596  0.6026  0.7980  0.0000
     6 C(13)  Bbb    -0.0524    -7.030    -2.509    -2.345  0.7980 -0.6026  0.0001
              Bcc     0.1104    14.812     5.285     4.941 -0.0001  0.0001  1.0000
 
              Baa    -0.0019    -1.037    -0.370    -0.346 -0.0002  0.0000  1.0000
     7 H(1)   Bbb    -0.0009    -0.468    -0.167    -0.156  0.6228  0.7824  0.0001
              Bcc     0.0028     1.505     0.537     0.502  0.7824 -0.6228  0.0001
 
              Baa    -0.0039    -2.060    -0.735    -0.687 -0.0003  0.0002  1.0000
     8 H(1)   Bbb    -0.0010    -0.545    -0.194    -0.182  0.9114 -0.4116  0.0004
              Bcc     0.0049     2.605     0.929     0.869  0.4116  0.9114  0.0000
 
              Baa    -0.0033    -1.742    -0.622    -0.581  0.0001  0.0006  1.0000
     9 H(1)   Bbb    -0.0018    -0.978    -0.349    -0.326  0.2406  0.9706 -0.0006
              Bcc     0.0051     2.720     0.971     0.907  0.9706 -0.2406  0.0001
 
              Baa    -0.0075    -4.001    -1.428    -1.335  0.6081  0.7939 -0.0001
    10 H(1)   Bbb    -0.0012    -0.659    -0.235    -0.220  0.0000  0.0001  1.0000
              Bcc     0.0087     4.660     1.663     1.555  0.7939 -0.6081  0.0000
 
              Baa    -0.0274    -3.672    -1.310    -1.225  0.9799 -0.1995  0.0000
    11 C(13)  Bbb    -0.0041    -0.550    -0.196    -0.183  0.1995  0.9799 -0.0001
              Bcc     0.0315     4.221     1.506     1.408  0.0000  0.0001  1.0000
 
              Baa    -0.3307    23.927     8.538     7.981  0.1827  0.9832  0.0006
    12 O(17)  Bbb    -0.3279    23.727     8.466     7.914  0.9832 -0.1827  0.0000
              Bcc     0.6586   -47.654   -17.004   -15.896 -0.0001 -0.0006  1.0000
 
              Baa    -0.2514   -33.730   -12.036   -11.251  0.8816 -0.4720 -0.0001
    13 C(13)  Bbb    -0.2483   -33.321   -11.890   -11.115  0.4720  0.8816  0.0003
              Bcc     0.4997    67.051    23.925    22.366 -0.0001 -0.0003  1.0000
 
              Baa    -0.0679    -9.110    -3.251    -3.039 -0.2891  0.9573 -0.0006
    14 C(13)  Bbb    -0.0661    -8.865    -3.163    -2.957  0.9573  0.2891  0.0000
              Bcc     0.1340    17.975     6.414     5.996 -0.0001  0.0006  1.0000
 
              Baa    -0.0256    -3.441    -1.228    -1.148 -0.0011 -0.0011  1.0000
    15 C(13)  Bbb     0.0078     1.047     0.374     0.349 -0.2927  0.9562  0.0007
              Bcc     0.0178     2.393     0.854     0.798  0.9562  0.2927  0.0014
 
              Baa    -0.0500    -6.710    -2.394    -2.238 -0.0001  0.0000  1.0000
    16 C(13)  Bbb     0.0203     2.725     0.972     0.909  0.2145  0.9767  0.0000
              Bcc     0.0297     3.985     1.422     1.329  0.9767 -0.2145  0.0001
 
              Baa    -0.0522    -7.004    -2.499    -2.336  0.1269  0.9919 -0.0002
    17 C(13)  Bbb    -0.0456    -6.112    -2.181    -2.039  0.9919 -0.1269  0.0001
              Bcc     0.0977    13.116     4.680     4.375 -0.0001  0.0002  1.0000
 
              Baa    -0.0705    -9.463    -3.377    -3.157 -0.2428  0.9701 -0.0001
    18 C(13)  Bbb    -0.0627    -8.412    -3.002    -2.806  0.9701  0.2428 -0.0001
              Bcc     0.1332    17.875     6.378     5.963  0.0000  0.0001  1.0000
 
              Baa    -0.0035    -1.870    -0.667    -0.624  0.0001  0.0005  1.0000
    19 H(1)   Bbb    -0.0022    -1.199    -0.428    -0.400  0.1438  0.9896 -0.0005
              Bcc     0.0058     3.069     1.095     1.024  0.9896 -0.1438 -0.0001
 
              Baa    -0.0391    -5.253    -1.874    -1.752  0.0000  0.0002  1.0000
    20 C(13)  Bbb     0.0174     2.333     0.832     0.778 -0.5625  0.8268 -0.0001
              Bcc     0.0218     2.920     1.042     0.974  0.8268  0.5625 -0.0001
 
              Baa    -0.0039    -2.066    -0.737    -0.689  0.0003  0.0000  1.0000
    21 H(1)   Bbb    -0.0012    -0.639    -0.228    -0.213  0.9995  0.0331 -0.0003
              Bcc     0.0051     2.705     0.965     0.902 -0.0331  0.9995  0.0000
 
              Baa    -0.0020    -1.077    -0.384    -0.359  0.0001 -0.0001  1.0000
    22 H(1)   Bbb    -0.0008    -0.440    -0.157    -0.147 -0.3104  0.9506  0.0001
              Bcc     0.0028     1.517     0.541     0.506  0.9506  0.3104 -0.0001
 
              Baa    -0.1240   -16.636    -5.936    -5.549  0.9547  0.2976  0.0000
    23 Br(79) Bbb    -0.0480    -6.439    -2.297    -2.148 -0.2976  0.9547 -0.0001
              Bcc     0.1720    23.075     8.234     7.697  0.0000  0.0001  1.0000
 
              Baa    -0.3290    23.810     8.496     7.942  0.9245  0.3811  0.0002
    24 O(17)  Bbb    -0.3184    23.037     8.220     7.684 -0.3811  0.9245  0.0005
              Bcc     0.6474   -46.847   -16.716   -15.626  0.0000 -0.0006  1.0000
 
              Baa    -0.0169    -9.012    -3.216    -3.006  0.6245  0.7811  0.0002
    25 H(1)   Bbb    -0.0131    -6.970    -2.487    -2.325  0.0002 -0.0004  1.0000
              Bcc     0.0300    15.981     5.703     5.331  0.7811 -0.6245 -0.0005
 

 ---------------------------------------------------------------------------------

 D1PCM: PCM CHGder 1st derivatives, ID1Alg=3 FixD1E=F DoIter=F DoCFld=F I1PDM=0.
 Calling FoFJK, ICntrl=      2127 FMM=F ISym2X=0 I1Cent= 0 IOpClX= 1 NMat=1 NMatS=1 NMatT=0.
 ***** Axes restored to original set *****
 -------------------------------------------------------------------
 Center     Atomic                   Forces (Hartrees/Bohr)
 Number     Number              X              Y              Z
 -------------------------------------------------------------------
      1        6           0.003425882    0.009473461    0.000000887
      2        6          -0.013250779   -0.000974698   -0.000001310
      3        6           0.025730047    0.035348512    0.000019139
      4        6           0.017568733   -0.006836388   -0.000026800
      5        6          -0.006368182    0.001754794    0.000000998
      6        6           0.003741269   -0.007177004    0.000000021
      7        1           0.000070243    0.000180289   -0.000000357
      8        1          -0.001857017   -0.000116648   -0.000000159
      9        1           0.000662069    0.000442261    0.000000305
     10        1          -0.000012340    0.000022699    0.000000153
     11        6          -0.004316918    0.022545210    0.000103624
     12        8           0.004369225   -0.019730944   -0.000037826
     13        6           0.038237456   -0.177511518   -0.000006255
     14        6          -0.011505709   -0.015382925   -0.000027226
     15        6          -0.038221801    0.015263786    0.000016510
     16        6           0.004619164    0.004322563    0.000001393
     17        6           0.011565606   -0.003805640   -0.000001016
     18        6          -0.003016229   -0.008116975    0.000000180
     19        1          -0.000629802    0.000159772    0.000000172
     20        6          -0.005960443    0.010735228    0.000000663
     21        1           0.009345727    0.003892062    0.000004027
     22        1          -0.000265405   -0.000041296   -0.000000455
     23       35           0.000919576    0.000248419    0.000000185
     24        8          -0.034396076    0.120721705   -0.000041238
     25        1          -0.000454299    0.014583275   -0.000005613
 -------------------------------------------------------------------
 Cartesian Forces:  Max     0.177511518 RMS     0.027108803

 GradGradGradGradGradGradGradGradGradGradGradGradGradGradGradGradGradGrad
 Berny optimization.
 FormGI is forming the generalized inverse of G from B-inverse, IUseBI=4.
 Internal  Forces:  Max     0.139553502 RMS     0.013449532
 Search for a local minimum.
 Step number   1 out of a maximum of  146
 All quantities printed in internal units (Hartrees-Bohrs-Radians)
 Mixed Optimization -- RFO/linear search
 Second derivative matrix not updated -- first step.
 ITU=  0
     Eigenvalues ---    0.00885   0.00896   0.01276   0.01537   0.01620
     Eigenvalues ---    0.01669   0.01728   0.01803   0.01869   0.02148
     Eigenvalues ---    0.02148   0.02161   0.02165   0.02169   0.02171
     Eigenvalues ---    0.02177   0.02186   0.02191   0.02193   0.02199
     Eigenvalues ---    0.02216   0.04043   0.16000   0.16000   0.16000
     Eigenvalues ---    0.16000   0.16000   0.16000   0.16000   0.16000
     Eigenvalues ---    0.17560   0.22000   0.22440   0.22587   0.23522
     Eigenvalues ---    0.24495   0.24622   0.25000   0.25000   0.25000
     Eigenvalues ---    0.25000   0.25000   0.25000   0.31974   0.32565
     Eigenvalues ---    0.33315   0.33555   0.35475   0.35479   0.35611
     Eigenvalues ---    0.35612   0.35627   0.35665   0.35748   0.39104
     Eigenvalues ---    0.41464   0.42267   0.42484   0.44806   0.45323
     Eigenvalues ---    0.46044   0.46182   0.46701   0.46962   0.47038
     Eigenvalues ---    0.47401   0.55473   0.94375   0.94730
 RFO step:  Lambda=-3.52553661D-02 EMin= 8.85066806D-03
 Linear search not attempted -- first point.
 Iteration  1 RMS(Cart)=  0.05014945 RMS(Int)=  0.00284514
 Iteration  2 RMS(Cart)=  0.00444404 RMS(Int)=  0.00003321
 Iteration  3 RMS(Cart)=  0.00002604 RMS(Int)=  0.00003039
 Iteration  4 RMS(Cart)=  0.00000000 RMS(Int)=  0.00003039
 Variable       Old X    -DE/DX   Delta X   Delta X   Delta X     New X
                                 (Linear)    (Quad)   (Total)
    R1        2.62773  -0.00616   0.00000  -0.01221  -0.01221   2.61552
    R2        2.64014   0.00566   0.00000   0.01076   0.01075   2.65089
    R3        2.04910  -0.00001   0.00000  -0.00002  -0.00002   2.04908
    R4        2.64091   0.01096   0.00000   0.02268   0.02268   2.66360
    R5        2.04694   0.00025   0.00000   0.00063   0.00063   2.04757
    R6        2.66092   0.00713   0.00000   0.01503   0.01505   2.67598
    R7        2.81480  -0.03431   0.00000  -0.09389  -0.09383   2.72097
    R8        2.64140   0.00188   0.00000   0.00388   0.00388   2.64529
    R9        2.81242  -0.01134   0.00000  -0.03004  -0.03010   2.78233
   R10        2.62738  -0.00300   0.00000  -0.00647  -0.00647   2.62091
   R11        2.04693  -0.00029   0.00000  -0.00075  -0.00075   2.04618
   R12        2.04904  -0.00001   0.00000  -0.00002  -0.00002   2.04901
   R13        2.30827   0.02021   0.00000   0.02057   0.02057   2.32883
   R14        2.82273  -0.01132   0.00000  -0.02971  -0.02977   2.79295
   R15        2.81555  -0.02319   0.00000  -0.06318  -0.06313   2.75243
   R16        2.30979   0.13955   0.00000   0.14255   0.14255   2.45234
   R17        2.65520   0.01163   0.00000   0.02605   0.02607   2.68128
   R18        2.63921   0.00118   0.00000   0.00266   0.00267   2.64188
   R19        2.64090   0.01588   0.00000   0.03313   0.03316   2.67406
   R20        2.62243  -0.00455   0.00000  -0.00996  -0.00999   2.61245
   R21        2.04478  -0.00027   0.00000  -0.00068  -0.00068   2.04410
   R22        2.62463  -0.00754   0.00000  -0.01504  -0.01505   2.60958
   R23        2.04669   0.00180   0.00000   0.00460   0.00460   2.05129
   R24        2.63780   0.00398   0.00000   0.00659   0.00655   2.64435
   R25        3.61788   0.00080   0.00000   0.00379   0.00379   3.62167
   R26        2.04609  -0.00023   0.00000  -0.00059  -0.00059   2.04550
   R27        1.81414   0.00716   0.00000   0.01213   0.01213   1.82627
    A1        2.09564   0.00097   0.00000   0.00206   0.00205   2.09770
    A2        2.09223  -0.00070   0.00000  -0.00212  -0.00212   2.09012
    A3        2.09531  -0.00027   0.00000   0.00006   0.00006   2.09537
    A4        2.09987  -0.00011   0.00000   0.00022   0.00023   2.10010
    A5        2.11087  -0.00183   0.00000  -0.00975  -0.00975   2.10112
    A6        2.07245   0.00194   0.00000   0.00952   0.00952   2.08197
    A7        2.08759  -0.00162   0.00000  -0.00289  -0.00292   2.08467
    A8        2.07849   0.00126   0.00000   0.00436   0.00431   2.08279
    A9        2.11711   0.00036   0.00000  -0.00147  -0.00139   2.11572
   A10        2.08836  -0.00218   0.00000  -0.00690  -0.00686   2.08150
   A11        2.11681   0.00189   0.00000   0.00665   0.00661   2.12342
   A12        2.07801   0.00029   0.00000   0.00025   0.00025   2.07827
   A13        2.09959   0.00229   0.00000   0.00768   0.00768   2.10727
   A14        2.07312  -0.00190   0.00000  -0.00769  -0.00769   2.06543
   A15        2.11047  -0.00039   0.00000   0.00001   0.00001   2.11049
   A16        2.09532   0.00065   0.00000  -0.00017  -0.00018   2.09514
   A17        2.09540  -0.00037   0.00000  -0.00012  -0.00012   2.09528
   A18        2.09246  -0.00028   0.00000   0.00030   0.00030   2.09277
   A19        2.12276   0.00393   0.00000   0.01215   0.01221   2.13497
   A20        2.04839  -0.00761   0.00000  -0.02342  -0.02354   2.02485
   A21        2.11204   0.00368   0.00000   0.01127   0.01133   2.12337
   A22        2.05014   0.00740   0.00000   0.02438   0.02453   2.07467
   A23        2.11983  -0.02305   0.00000  -0.08004  -0.08011   2.03971
   A24        2.11321   0.01565   0.00000   0.05566   0.05559   2.16880
   A25        2.11741   0.00278   0.00000   0.01177   0.01168   2.12909
   A26        2.06934  -0.00258   0.00000  -0.01227  -0.01225   2.05709
   A27        2.09644  -0.00021   0.00000   0.00049   0.00057   2.09701
   A28        2.11651  -0.00482   0.00000  -0.01791  -0.01789   2.09862
   A29        2.08187   0.01213   0.00000   0.03970   0.03963   2.12150
   A30        2.08481  -0.00731   0.00000  -0.02178  -0.02174   2.06307
   A31        2.08154   0.00284   0.00000   0.00950   0.00948   2.09101
   A32        2.07871  -0.00203   0.00000  -0.00788  -0.00786   2.07084
   A33        2.12294  -0.00081   0.00000  -0.00163  -0.00162   2.12133
   A34        2.10733   0.00251   0.00000   0.01143   0.01145   2.11878
   A35        2.07653   0.00894   0.00000   0.04653   0.04652   2.12305
   A36        2.09933  -0.01146   0.00000  -0.05796  -0.05797   2.04136
   A37        2.11935   0.00100   0.00000  -0.00088  -0.00095   2.11841
   A38        2.08232   0.00042   0.00000   0.00365   0.00368   2.08600
   A39        2.08151  -0.00141   0.00000  -0.00277  -0.00274   2.07878
   A40        2.07691   0.00116   0.00000   0.00123   0.00118   2.07809
   A41        2.10155  -0.00072   0.00000  -0.00130  -0.00128   2.10027
   A42        2.10473  -0.00045   0.00000   0.00007   0.00009   2.10482
   A43        1.91063   0.02306   0.00000   0.11811   0.11811   2.02875
    D1        0.00000   0.00000   0.00000   0.00000   0.00000   0.00000
    D2       -3.14158   0.00000   0.00000  -0.00003  -0.00003   3.14158
    D3        3.14159   0.00000   0.00000   0.00002   0.00002  -3.14158
    D4        0.00001   0.00000   0.00000  -0.00002  -0.00002  -0.00001
    D5       -0.00001   0.00000   0.00000   0.00001   0.00001   0.00001
    D6       -3.14159   0.00000   0.00000   0.00000   0.00000  -3.14159
    D7        3.14159   0.00000   0.00000   0.00000   0.00000  -3.14159
    D8        0.00001   0.00000   0.00000  -0.00001  -0.00001  -0.00001
    D9        0.00001   0.00000   0.00000  -0.00003  -0.00003  -0.00002
   D10       -3.14154   0.00000   0.00000  -0.00008  -0.00008   3.14157
   D11        3.14159   0.00000   0.00000   0.00000   0.00000   3.14159
   D12        0.00004   0.00000   0.00000  -0.00004  -0.00004  -0.00001
   D13       -0.00002   0.00000   0.00000   0.00005   0.00005   0.00003
   D14        3.14154   0.00001   0.00000   0.00011   0.00010  -3.14154
   D15        3.14153   0.00000   0.00000   0.00009   0.00009  -3.14156
   D16       -0.00010   0.00001   0.00000   0.00015   0.00015   0.00005
   D17       -3.14151   0.00000   0.00000   0.00000   0.00000  -3.14151
   D18       -0.00088   0.00003   0.00000   0.00043   0.00042  -0.00047
   D19        0.00012   0.00000   0.00000  -0.00004  -0.00004   0.00008
   D20        3.14075   0.00003   0.00000   0.00039   0.00037   3.14112
   D21        0.00001   0.00000   0.00000  -0.00003  -0.00003  -0.00002
   D22        3.14159   0.00000   0.00000   0.00000   0.00000   3.14159
   D23       -3.14154  -0.00001   0.00000  -0.00009  -0.00009   3.14156
   D24        0.00003   0.00000   0.00000  -0.00006  -0.00005  -0.00002
   D25        3.14080   0.00002   0.00000   0.00050   0.00050   3.14130
   D26        0.00007  -0.00001   0.00000  -0.00024  -0.00024  -0.00017
   D27       -0.00083   0.00003   0.00000   0.00056   0.00056  -0.00027
   D28       -3.14156  -0.00001   0.00000  -0.00018  -0.00018   3.14144
   D29        0.00000   0.00000   0.00000   0.00000   0.00000   0.00000
   D30        3.14159   0.00000   0.00000   0.00001   0.00001  -3.14159
   D31       -3.14158   0.00000   0.00000  -0.00004  -0.00003   3.14157
   D32        0.00001   0.00000   0.00000  -0.00002  -0.00002  -0.00001
   D33       -0.00007   0.00001   0.00000   0.00024   0.00024   0.00017
   D34        3.14156   0.00001   0.00000   0.00017   0.00017  -3.14145
   D35       -3.14081  -0.00002   0.00000  -0.00050  -0.00050  -3.14131
   D36        0.00083  -0.00002   0.00000  -0.00057  -0.00057   0.00026
   D37       -0.00012   0.00000   0.00000   0.00004   0.00004  -0.00008
   D38        3.14151   0.00000   0.00000   0.00004   0.00004   3.14155
   D39       -3.14075  -0.00001   0.00000  -0.00031  -0.00033  -3.14108
   D40        0.00088  -0.00001   0.00000  -0.00031  -0.00033   0.00055
   D41       -3.14095  -0.00002   0.00000  -0.00025  -0.00025  -3.14119
   D42       -0.00035   0.00001   0.00000   0.00018   0.00017  -0.00018
   D43        0.00010  -0.00001   0.00000  -0.00014  -0.00015  -0.00005
   D44       -3.14154   0.00000   0.00000  -0.00014  -0.00014   3.14151
   D45       -3.14154   0.00000   0.00000  -0.00008  -0.00008   3.14157
   D46        0.00002   0.00000   0.00000  -0.00007  -0.00007  -0.00006
   D47        3.14154   0.00000   0.00000   0.00011   0.00011  -3.14153
   D48       -0.00004   0.00000   0.00000   0.00007   0.00007   0.00003
   D49       -0.00001   0.00000   0.00000   0.00004   0.00004   0.00003
   D50       -3.14159   0.00000   0.00000   0.00000   0.00000  -3.14159
   D51        3.14154   0.00000   0.00000   0.00006   0.00006  -3.14158
   D52       -0.00004   0.00000   0.00000   0.00005   0.00005   0.00002
   D53       -0.00001   0.00000   0.00000   0.00006   0.00006   0.00005
   D54       -3.14159   0.00000   0.00000   0.00005   0.00005  -3.14154
   D55        0.00000   0.00000   0.00000   0.00001   0.00001   0.00001
   D56       -3.14159   0.00000   0.00000  -0.00002  -0.00002   3.14158
   D57        3.14158   0.00000   0.00000   0.00005   0.00005  -3.14156
   D58       -0.00001   0.00000   0.00000   0.00002   0.00002   0.00001
   D59        0.00000   0.00000   0.00000  -0.00001  -0.00001  -0.00002
   D60       -3.14159   0.00000   0.00000  -0.00002  -0.00002   3.14158
   D61        3.14158   0.00000   0.00000   0.00000   0.00000   3.14157
   D62       -0.00001   0.00000   0.00000  -0.00001  -0.00001  -0.00002
   D63        0.00001   0.00000   0.00000  -0.00002  -0.00002  -0.00001
   D64       -3.14159   0.00000   0.00000  -0.00002  -0.00002   3.14157
   D65       -3.14159   0.00000   0.00000   0.00001   0.00001  -3.14159
   D66       -0.00001   0.00000   0.00000   0.00001   0.00001   0.00000
         Item               Value     Threshold  Converged?
 Maximum Force            0.139554     0.000450     NO 
 RMS     Force            0.013450     0.000300     NO 
 Maximum Displacement     0.397246     0.001800     NO 
 RMS     Displacement     0.052572     0.001200     NO 
 Predicted change in Energy=-1.890641D-02
 GradGradGradGradGradGradGradGradGradGradGradGradGradGradGradGradGradGrad

                          Input orientation:                          
 ---------------------------------------------------------------------
 Center     Atomic      Atomic             Coordinates (Angstroms)
 Number     Number       Type             X           Y           Z
 ---------------------------------------------------------------------
      1          6           0       -5.064144    0.066675   -0.000072
      2          6           0       -4.032575    0.989453    0.000069
      3          6           0       -2.690981    0.557179    0.000095
      4          6           0       -2.406648   -0.830048    0.000003
      5          6           0       -3.465602   -1.745539   -0.000147
      6          6           0       -4.781484   -1.307344   -0.000185
      7          1           0       -6.092849    0.409504   -0.000101
      8          1           0       -4.247274    2.051498    0.000143
      9          1           0       -3.231171   -2.802646   -0.000216
     10          1           0       -5.591367   -2.028297   -0.000296
     11          6           0       -1.023800   -1.335548    0.000085
     12          8           0       -0.762428   -2.539877    0.000307
     13          6           0       -1.634591    1.535590    0.000210
     14          6           0        0.041065   -0.310632    0.000043
     15          6           0       -0.251929    1.077657    0.000133
     16          6           0        1.368897   -0.748045   -0.000054
     17          6           0        0.830122    1.989545    0.000193
     18          6           0        2.396887    0.176290   -0.000026
     19          1           0        1.564493   -1.811903   -0.000126
     20          6           0        2.139835    1.551809    0.000105
     21          1           0        0.670044    3.063172    0.000315
     22          1           0        2.954490    2.264549    0.000143
     23         35           0        4.214144   -0.432459   -0.000139
     24          8           0       -1.990948    2.783425   -0.000256
     25          1           0       -1.274759    3.432302   -0.000522
 ---------------------------------------------------------------------
                    Distance matrix (angstroms):
                    1          2          3          4          5
     1  C    0.000000
     2  C    1.384071   0.000000
     3  C    2.423323   1.409515   0.000000
     4  C    2.804710   2.440127   1.416067   0.000000
     5  C    2.416496   2.793141   2.429516   1.399825   0.000000
     6  C    1.402792   2.415811   2.801187   2.422325   1.386924
     7  H    1.084328   2.140344   3.405072   3.889032   3.398034
     8  H    2.146345   1.083529   2.157553   3.419241   3.876661
     9  H    3.404819   3.875856   3.402974   2.137985   1.082789
    10  H    2.160295   3.396564   3.885476   3.402681   2.144488
    11  C    4.276752   3.802414   2.522283   1.472344   2.475983
    12  O    5.029798   4.811447   3.648434   2.372124   2.817467
    13  C    3.730891   2.459389   1.439878   2.488436   3.757447
    14  C    5.119132   4.276068   2.866561   2.502217   3.788888
    15  C    4.917265   3.781674   2.493967   2.877872   4.277631
    16  C    6.484426   5.674046   4.264531   3.776435   4.936333
    17  C    6.199983   4.964474   3.801294   4.292642   5.692460
    18  C    7.461836   6.480680   5.102106   4.907817   6.169458
    19  H    6.889694   6.258975   4.870484   4.090721   5.030533
    20  C    7.355470   6.197974   4.932147   5.132616   6.503340
    21  H    6.469923   5.139546   4.192432   4.962176   6.342497
    22  H    8.314393   7.102460   5.898004   6.190179   7.569570
    23  Br   9.291703   8.368405   6.975682   6.632718   7.791192
    24  O    4.101861   2.717826   2.333713   3.637306   4.762995
    25  H    5.068223   3.684164   3.204999   4.410079   5.622262
                    6          7          8          9         10
     6  C    0.000000
     7  H    2.160381   0.000000
     8  H    3.401059   2.470282   0.000000
     9  H    2.153926   4.301989   4.959353   0.000000
    10  H    1.084290   2.488847   4.295500   2.483977   0.000000
    11  C    3.757790   5.361014   4.675774   2.650446   4.619802
    12  O    4.203801   6.091981   5.764102   2.482687   4.855961
    13  C    4.240897   4.598276   2.663133   4.622700   5.325164
    14  C    4.924470   6.176042   4.895867   4.113108   5.888519
    15  C    5.119091   5.879011   4.112316   4.892099   6.177098
    16  C    6.175759   7.550999   6.275255   5.038056   7.077028
    17  C    6.508425   7.100990   5.077774   6.281655   7.574864
    18  C    7.330087   8.492939   6.903716   6.367817   8.286882
    19  H    6.366004   7.973051   6.978718   4.896934   7.159131
    20  C    7.488619   8.311555   6.406626   6.914404   8.519897
    21  H    6.987171   7.264893   5.020309   7.044664   8.070212
    22  H    8.520781   9.235558   7.204915   7.996178   9.563482
    23  Br   9.038071  10.341325   8.818483   7.813481   9.934522
    24  O    4.951917   4.739314   2.372072   5.722093   6.009633
    25  H    5.895877   5.687821   3.277570   6.534686   6.960693
                   11         12         13         14         15
    11  C    0.000000
    12  O    1.232365   0.000000
    13  C    2.935387   4.167745   0.000000
    14  C    1.477968   2.369627   2.493262   0.000000
    15  C    2.533642   3.653376   1.456521   1.418870   0.000000
    16  C    2.463769   2.784459   3.773053   1.398023   2.441366
    17  C    3.807002   4.801237   2.506169   2.431753   1.415053
    18  C    3.739887   4.166394   4.254470   2.405617   2.797980
    19  H    2.631763   2.438137   4.630318   2.138843   3.413055
    20  C    4.283155   5.016475   3.774461   2.805980   2.438310
    21  H    4.713580   5.783263   2.764932   3.431934   2.189133
    22  H    5.365397   6.074371   4.646616   3.888393   3.419040
    23  Br   5.315225   5.404394   6.170973   4.174857   4.714473
    24  O    4.230994   5.463223   1.297723   3.701657   2.435946
    25  H    4.774450   5.994114   1.930543   3.967486   2.567203
                   16         17         18         19         20
    16  C    0.000000
    17  C    2.790104   0.000000
    18  C    1.382447   2.396382   0.000000
    19  H    1.081689   3.871732   2.155410   0.000000
    20  C    2.425628   1.380928   1.399331   3.412561   0.000000
    21  H    3.874761   1.085495   3.363938   4.956450   2.108200
    22  H    3.404383   2.142094   2.161422   4.306919   1.082433
    23  Br   2.862695   4.161455   1.916506   2.987225   2.870553
    24  O    4.874407   2.930645   5.103945   5.810181   4.310481
    25  H    4.946131   2.551876   4.907402   5.963475   3.898167
                   21         22         23         24         25
    21  H    0.000000
    22  H    2.420019   0.000000
    23  Br   4.977960   2.976673   0.000000
    24  O    2.675656   4.972584   6.988925   0.000000
    25  H    1.979524   4.387504   6.713004   0.966420   0.000000
 Stoichiometry    C14H8BrO2(2)
 Framework group  C1[X(C14H8BrO2)]
 Deg. of freedom    69
 Full point group                 C1      NOp   1
 Largest Abelian subgroup         C1      NOp   1
 Largest concise Abelian subgroup C1      NOp   1
                         Standard orientation:                         
 ---------------------------------------------------------------------
 Center     Atomic      Atomic             Coordinates (Angstroms)
 Number     Number       Type             X           Y           Z
 ---------------------------------------------------------------------
      1          6           0        5.055862   -0.003225    0.000055
      2          6           0        4.035346    0.931762   -0.000085
      3          6           0        2.688704    0.515483   -0.000112
      4          6           0        2.387883   -0.868262   -0.000020
      5          6           0        3.435869   -1.796290    0.000130
      6          6           0        4.756872   -1.373784    0.000168
      7          1           0        6.088574    0.327339    0.000084
      8          1           0        4.262668    1.991177   -0.000160
      9          1           0        3.188876   -2.850532    0.000199
     10          1           0        5.558119   -2.104323    0.000279
     11          6           0        0.999118   -1.357272   -0.000102
     12          8           0        0.723435   -2.558406   -0.000324
     13          6           0        1.644030    1.506394   -0.000226
     14          6           0       -0.053475   -0.319758   -0.000060
     15          6           0        0.256018    1.064946   -0.000150
     16          6           0       -1.386419   -0.741340    0.000037
     17          6           0       -0.815106    1.989645   -0.000210
     18          6           0       -2.403337    0.195162    0.000010
     19          1           0       -1.594660   -1.802795    0.000109
     20          6           0       -2.129935    1.567525   -0.000122
     21          1           0       -0.642264    3.061292   -0.000332
     22          1           0       -2.936051    2.289908   -0.000160
     23         35           0       -4.227708   -0.391920    0.000122
     24          8           0        2.015210    2.749901    0.000239
     25          1           0        1.306793    3.407254    0.000505
 ---------------------------------------------------------------------
 Rotational constants (GHZ):      0.9794368      0.1769905      0.1499022
 Standard basis: 6-311G(d) (5D, 7F)
 There are   375 symmetry adapted cartesian basis functions of A   symmetry.
 There are   356 symmetry adapted basis functions of A   symmetry.
   356 basis functions,   642 primitive gaussians,   375 cartesian basis functions
    72 alpha electrons       71 beta electrons
       nuclear repulsion energy      1392.4005454637 Hartrees.
 NAtoms=   25 NActive=   25 NUniq=   25 SFac= 1.00D+00 NAtFMM=   60 NAOKFM=F Big=F
 Integral buffers will be    262144 words long.
 Raffenetti 2 integral format.
 Two-electron integral symmetry is turned on.
 Nuclear repulsion after empirical dispersion term =     1392.3372199591 Hartrees.
 ------------------------------------------------------------------------------
 Polarizable Continuum Model (PCM)
 =================================
 Model                : PCM (using non-symmetric T matrix).
 Atomic radii         : UFF (Universal Force Field).
 Polarization charges : Total charges.
 Charge compensation  : None.
 Solution method      : On-the-fly selection.
 Cavity type          : Scaled VdW (van der Waals Surface) (Alpha=1.100).
 Cavity algorithm     : GePol (No added spheres)
                        Default sphere list used, NSphG=   25.
                        Lebedev-Laikov grids with approx.  5.0 points / Ang**2.
                        Smoothing algorithm: Karplus/York (Gamma=1.0000).
                        Polarization charges: spherical gaussians, with
                                              point-specific exponents (IZeta= 3).
                        Self-potential: point-specific (ISelfS= 7).
                        Self-field    : sphere-specific E.n sum rule (ISelfD= 2).
 1st derivatives      : Analytical E(r).r(x)/FMM algorithm (CHGder, D1EAlg=3).
                        Cavity 1st derivative terms included.
 Solvent              : Acetonitrile, Eps=  35.688000 Eps(inf)=   1.806874
 ------------------------------------------------------------------------------
 One-electron integrals computed using PRISM.
 NBasis=   356 RedAO= T EigKep=  8.98D-05  NBF=   356
 NBsUse=   356 1.00D-06 EigRej= -1.00D+00 NBFU=   356
 Initial guess from the checkpoint file:  "C:\Users\Shengfu Liao\Desktop\suppliment\HS2 opt.chk"
 B after Tr=     0.000000    0.000000    0.000000
         Rot=    0.999994    0.000006   -0.000004    0.003342 Ang=   0.38 deg.
 Initial guess <Sx>= 0.0000 <Sy>= 0.0000 <Sz>= 0.5000 <S**2>= 0.7666 S= 0.5083
 ExpMin= 1.03D-01 ExpMax= 4.40D+05 ExpMxC= 1.51D+04 IAcc=2 IRadAn=         4 AccDes= 0.00D+00
 Harris functional with IExCor=  402 and IRadAn=       4 diagonalized for initial guess.
 HarFok:  IExCor=  402 AccDes= 0.00D+00 IRadAn=         4 IDoV= 1 UseB2=F ITyADJ=14
 ICtDFT=  3500011 ScaDFX=  1.000000  1.000000  1.000000  1.000000
 FoFCou: FMM=F IPFlag=           0 FMFlag=      100000 FMFlg1=           0
         NFxFlg=           0 DoJE=T BraDBF=F KetDBF=T FulRan=T
         wScrn=  0.000000 ICntrl=     500 IOpCl=  0 I1Cent=   200000004 NGrid=           0
         NMat0=    1 NMatS0=      1 NMatT0=    0 NMatD0=    1 NMtDS0=    0 NMtDT0=    0
 Petite list used in FoFCou.
 Requested convergence on RMS density matrix=1.00D-08 within 128 cycles.
 Requested convergence on MAX density matrix=1.00D-06.
 Requested convergence on             energy=1.00D-06.
 No special actions if energy rises.
 Inv3:  Mode=1 IEnd=    14467248.
 Iteration    1 A*A^-1 deviation from unit magnitude is 2.89D-15 for   1273.
 Iteration    1 A*A^-1 deviation from orthogonality  is 2.21D-15 for   1631    807.
 Iteration    1 A^-1*A deviation from unit magnitude is 2.66D-15 for    471.
 Iteration    1 A^-1*A deviation from orthogonality  is 1.31D-13 for   1876   1874.
 Error on total polarization charges =  0.01444
 SCF Done:  E(UB3LYP) =  -3263.12071892     A.U. after   16 cycles
            NFock= 16  Conv=0.67D-08     -V/T= 2.0017
 <Sx>= 0.0000 <Sy>= 0.0000 <Sz>= 0.5000 <S**2>= 0.7698 S= 0.5099
 <L.S>= 0.000000000000E+00
 Annihilation of the first spin contaminant:
 S**2 before annihilation     0.7698,   after     0.7503
 D1PCM: PCM CHGder 1st derivatives, ID1Alg=3 FixD1E=F DoIter=F DoCFld=F I1PDM=0.
 Calling FoFJK, ICntrl=      2127 FMM=F ISym2X=0 I1Cent= 0 IOpClX= 1 NMat=1 NMatS=1 NMatT=0.
 ***** Axes restored to original set *****
 -------------------------------------------------------------------
 Center     Atomic                   Forces (Hartrees/Bohr)
 Number     Number              X              Y              Z
 -------------------------------------------------------------------
      1        6           0.002023063    0.003369687    0.000000109
      2        6          -0.007027799   -0.002084788   -0.000003917
      3        6           0.005050933    0.013505294    0.000012309
      4        6           0.003494704   -0.004264518    0.000001362
      5        6          -0.004033584    0.000900124    0.000002558
      6        6           0.001502142   -0.003354712   -0.000000356
      7        1          -0.000055230   -0.000162628    0.000000401
      8        1           0.000135603   -0.001157100    0.000000249
      9        1           0.000334928   -0.000026746   -0.000000121
     10        1          -0.000050668    0.000115539   -0.000000336
     11        6          -0.002346545    0.010363975    0.000012321
     12        8           0.001225374   -0.006262266   -0.000008393
     13        6           0.026652604   -0.055591855   -0.000035655
     14        6          -0.003086311   -0.005236006    0.000000514
     15        6          -0.015090389    0.013997354    0.000011534
     16        6           0.003727285    0.002580598    0.000002605
     17        6           0.002484090    0.000571823   -0.000006100
     18        6          -0.000050792   -0.004411666   -0.000000498
     19        1          -0.000597065   -0.000104378    0.000000059
     20        6          -0.002202281    0.002560249    0.000000270
     21        1          -0.000846107   -0.000493480    0.000000704
     22        1          -0.000149772    0.000037872    0.000000271
     23       35           0.000042962    0.000205125   -0.000000340
     24        8          -0.012901525    0.039737006    0.000003956
     25        1           0.001764380   -0.004794502    0.000006496
 -------------------------------------------------------------------
 Cartesian Forces:  Max     0.055591855 RMS     0.009370541

 GradGradGradGradGradGradGradGradGradGradGradGradGradGradGradGradGradGrad
 Berny optimization.
 Using GEDIIS/GDIIS optimizer.
 FormGI is forming the generalized inverse of G from B-inverse, IUseBI=4.
 Internal  Forces:  Max     0.036654257 RMS     0.003919679
 Search for a local minimum.
 Step number   2 out of a maximum of  146
 All quantities printed in internal units (Hartrees-Bohrs-Radians)
 Mixed Optimization -- RFO/linear search
 Update second derivatives using D2CorX and points    1    2
 DE= -2.03D-02 DEPred=-1.89D-02 R= 1.07D+00
 TightC=F SS=  1.41D+00  RLast= 2.69D-01 DXNew= 5.0454D-01 8.0799D-01
 Trust test= 1.07D+00 RLast= 2.69D-01 DXMaxT set to 5.05D-01
 ITU=  1  0
 Use linear search instead of GDIIS.
     Eigenvalues ---    0.00885   0.00896   0.01276   0.01533   0.01607
     Eigenvalues ---    0.01672   0.01725   0.01805   0.01866   0.02148
     Eigenvalues ---    0.02148   0.02160   0.02165   0.02168   0.02171
     Eigenvalues ---    0.02177   0.02184   0.02191   0.02194   0.02199
     Eigenvalues ---    0.02216   0.04043   0.15939   0.16000   0.16000
     Eigenvalues ---    0.16000   0.16000   0.16000   0.16000   0.17554
     Eigenvalues ---    0.17778   0.21980   0.22444   0.22536   0.23417
     Eigenvalues ---    0.23852   0.24505   0.24634   0.25000   0.25000
     Eigenvalues ---    0.25000   0.25000   0.27295   0.29501   0.32224
     Eigenvalues ---    0.33127   0.34713   0.35475   0.35479   0.35612
     Eigenvalues ---    0.35617   0.35665   0.35676   0.35748   0.39103
     Eigenvalues ---    0.41447   0.42245   0.42672   0.44840   0.45276
     Eigenvalues ---    0.45778   0.46180   0.46693   0.46997   0.47112
     Eigenvalues ---    0.47364   0.55647   0.77314   0.94734
 RFO step:  Lambda=-4.12340988D-03 EMin= 8.85098519D-03
 Quartic linear search produced a step of  0.24857.
 Iteration  1 RMS(Cart)=  0.01573756 RMS(Int)=  0.00029156
 Iteration  2 RMS(Cart)=  0.00040617 RMS(Int)=  0.00004825
 Iteration  3 RMS(Cart)=  0.00000004 RMS(Int)=  0.00004825
 Variable       Old X    -DE/DX   Delta X   Delta X   Delta X     New X
                                 (Linear)    (Quad)   (Total)
    R1        2.61552  -0.00204  -0.00303  -0.00417  -0.00720   2.60831
    R2        2.65089   0.00183   0.00267   0.00318   0.00584   2.65673
    R3        2.04908   0.00001   0.00000   0.00002   0.00002   2.04910
    R4        2.66360   0.00445   0.00564   0.00984   0.01549   2.67909
    R5        2.04757  -0.00115   0.00016  -0.00406  -0.00391   2.04367
    R6        2.67598   0.00256   0.00374   0.00645   0.01025   2.68623
    R7        2.72097  -0.00598  -0.02332  -0.01254  -0.03573   2.68524
    R8        2.64529   0.00167   0.00097   0.00426   0.00522   2.65051
    R9        2.78233  -0.00213  -0.00748  -0.00350  -0.01107   2.77126
   R10        2.62091  -0.00213  -0.00161  -0.00522  -0.00685   2.61406
   R11        2.04618   0.00009  -0.00019   0.00039   0.00020   2.04638
   R12        2.04901  -0.00004  -0.00001  -0.00015  -0.00015   2.04886
   R13        2.32883   0.00638   0.00511   0.00601   0.01112   2.33995
   R14        2.79295  -0.00170  -0.00740  -0.00264  -0.01017   2.78278
   R15        2.75243  -0.01826  -0.01569  -0.06166  -0.07726   2.67517
   R16        2.45234   0.03665   0.03543   0.03188   0.06732   2.51966
   R17        2.68128   0.00192   0.00648   0.00213   0.00857   2.68985
   R18        2.64188   0.00179   0.00066   0.00465   0.00531   2.64719
   R19        2.67406  -0.00005   0.00824  -0.00385   0.00440   2.67846
   R20        2.61245  -0.00153  -0.00248  -0.00281  -0.00530   2.60714
   R21        2.04410   0.00000  -0.00017   0.00008  -0.00008   2.04401
   R22        2.60958  -0.00131  -0.00374  -0.00187  -0.00561   2.60397
   R23        2.05129  -0.00037   0.00114  -0.00178  -0.00064   2.05065
   R24        2.64435   0.00301   0.00163   0.00726   0.00888   2.65323
   R25        3.62167  -0.00002   0.00094  -0.00050   0.00044   3.62211
   R26        2.04550  -0.00009  -0.00015  -0.00026  -0.00040   2.04510
   R27        1.82627  -0.00190   0.00302  -0.00561  -0.00260   1.82367
    A1        2.09770   0.00095   0.00051   0.00364   0.00414   2.10184
    A2        2.09012  -0.00032  -0.00053  -0.00050  -0.00103   2.08909
    A3        2.09537  -0.00064   0.00002  -0.00313  -0.00311   2.09226
    A4        2.10010   0.00062   0.00006   0.00388   0.00397   2.10407
    A5        2.10112  -0.00040  -0.00242  -0.00173  -0.00417   2.09695
    A6        2.08197  -0.00022   0.00237  -0.00215   0.00020   2.08217
    A7        2.08467  -0.00242  -0.00073  -0.00991  -0.01068   2.07399
    A8        2.08279   0.00598   0.00107   0.02796   0.02891   2.11170
    A9        2.11572  -0.00356  -0.00034  -0.01805  -0.01823   2.09749
   A10        2.08150   0.00044  -0.00171   0.00306   0.00141   2.08290
   A11        2.12342  -0.00189   0.00164  -0.00817  -0.00659   2.11684
   A12        2.07827   0.00144   0.00006   0.00511   0.00518   2.08345
   A13        2.10727   0.00080   0.00191   0.00338   0.00529   2.11256
   A14        2.06543  -0.00072  -0.00191  -0.00376  -0.00567   2.05975
   A15        2.11049  -0.00008   0.00000   0.00038   0.00038   2.11087
   A16        2.09514  -0.00040  -0.00005  -0.00406  -0.00413   2.09101
   A17        2.09528   0.00006  -0.00003   0.00098   0.00097   2.09625
   A18        2.09277   0.00034   0.00008   0.00308   0.00316   2.09593
   A19        2.13497  -0.00029   0.00303  -0.00402  -0.00087   2.13410
   A20        2.02485   0.00026  -0.00585   0.00634   0.00026   2.02511
   A21        2.12337   0.00004   0.00282  -0.00232   0.00061   2.12398
   A22        2.07467   0.00780   0.00610   0.03373   0.04006   2.11473
   A23        2.03971  -0.00091  -0.01991   0.00480  -0.01523   2.02448
   A24        2.16880  -0.00689   0.01382  -0.03853  -0.02483   2.14397
   A25        2.12909  -0.00104   0.00290  -0.00607  -0.00333   2.12575
   A26        2.05709   0.00214  -0.00305   0.01152   0.00857   2.06565
   A27        2.09701  -0.00110   0.00014  -0.00545  -0.00523   2.09178
   A28        2.09862  -0.00158  -0.00445  -0.00778  -0.01217   2.08645
   A29        2.12150   0.00091   0.00985   0.00149   0.01131   2.13281
   A30        2.06307   0.00067  -0.00540   0.00629   0.00086   2.06393
   A31        2.09101   0.00055   0.00236   0.00228   0.00461   2.09563
   A32        2.07084  -0.00090  -0.00195  -0.00563  -0.00758   2.06327
   A33        2.12133   0.00036  -0.00040   0.00335   0.00296   2.12429
   A34        2.11878  -0.00021   0.00285  -0.00301  -0.00015   2.11862
   A35        2.12305  -0.00082   0.01156  -0.01039   0.00117   2.12422
   A36        2.04136   0.00103  -0.01441   0.01340  -0.00102   2.04034
   A37        2.11841  -0.00037  -0.00024  -0.00193  -0.00219   2.11622
   A38        2.08600   0.00053   0.00092   0.00232   0.00324   2.08925
   A39        2.07878  -0.00016  -0.00068  -0.00039  -0.00106   2.07772
   A40        2.07809   0.00047   0.00029   0.00182   0.00210   2.08019
   A41        2.10027  -0.00035  -0.00032  -0.00171  -0.00202   2.09825
   A42        2.10482  -0.00012   0.00002  -0.00011  -0.00008   2.10474
   A43        2.02875  -0.00867   0.02936  -0.07694  -0.04758   1.98117
    D1        0.00000   0.00000   0.00000   0.00000   0.00000   0.00001
    D2        3.14158   0.00000  -0.00001  -0.00001  -0.00001   3.14156
    D3       -3.14158   0.00000   0.00000   0.00000   0.00001  -3.14157
    D4       -0.00001   0.00000   0.00000  -0.00001  -0.00001  -0.00002
    D5        0.00001   0.00000   0.00000   0.00001   0.00001   0.00002
    D6       -3.14159   0.00000   0.00000   0.00001   0.00001  -3.14158
    D7       -3.14159   0.00000   0.00000   0.00001   0.00001  -3.14158
    D8       -0.00001   0.00000   0.00000   0.00001   0.00001   0.00000
    D9       -0.00002   0.00000  -0.00001  -0.00001  -0.00002  -0.00004
   D10        3.14157   0.00000  -0.00002  -0.00004  -0.00006   3.14151
   D11        3.14159   0.00000   0.00000   0.00000   0.00000   3.14159
   D12       -0.00001   0.00000  -0.00001  -0.00003  -0.00004  -0.00005
   D13        0.00003   0.00000   0.00001   0.00001   0.00002   0.00005
   D14       -3.14154   0.00000   0.00003   0.00001   0.00004  -3.14151
   D15       -3.14156   0.00000   0.00002   0.00003   0.00006  -3.14150
   D16        0.00005   0.00000   0.00004   0.00004   0.00007   0.00013
   D17       -3.14151   0.00000   0.00000  -0.00001  -0.00001  -3.14152
   D18       -0.00047   0.00001   0.00010   0.00090   0.00101   0.00054
   D19        0.00008   0.00000  -0.00001  -0.00003  -0.00005   0.00003
   D20        3.14112   0.00001   0.00009   0.00088   0.00097  -3.14109
   D21       -0.00002   0.00000  -0.00001   0.00001   0.00000  -0.00002
   D22        3.14159   0.00000   0.00000  -0.00001   0.00000   3.14159
   D23        3.14156   0.00000  -0.00002   0.00000  -0.00002   3.14153
   D24       -0.00002   0.00000  -0.00001  -0.00001  -0.00002  -0.00004
   D25        3.14130   0.00000   0.00013   0.00056   0.00068  -3.14120
   D26       -0.00017   0.00000  -0.00006  -0.00004  -0.00009  -0.00026
   D27       -0.00027   0.00000   0.00014   0.00056   0.00070   0.00044
   D28        3.14144   0.00000  -0.00004  -0.00003  -0.00007   3.14137
   D29        0.00000   0.00000   0.00000  -0.00001  -0.00001  -0.00002
   D30       -3.14159   0.00000   0.00000  -0.00001  -0.00001   3.14159
   D31        3.14157   0.00000  -0.00001   0.00000  -0.00001   3.14156
   D32       -0.00001   0.00000  -0.00001   0.00000  -0.00001  -0.00002
   D33        0.00017   0.00000   0.00006   0.00003   0.00009   0.00026
   D34       -3.14145   0.00000   0.00004   0.00000   0.00005  -3.14141
   D35       -3.14131   0.00000  -0.00012  -0.00056  -0.00068   3.14120
   D36        0.00026  -0.00001  -0.00014  -0.00059  -0.00073  -0.00047
   D37       -0.00008   0.00000   0.00001   0.00003   0.00004  -0.00003
   D38        3.14155   0.00000   0.00001   0.00001   0.00002   3.14158
   D39       -3.14108  -0.00001  -0.00008  -0.00097  -0.00105   3.14105
   D40        0.00055  -0.00001  -0.00008  -0.00099  -0.00107  -0.00052
   D41       -3.14119  -0.00001  -0.00006  -0.00060  -0.00064   3.14135
   D42       -0.00018   0.00000   0.00004   0.00039   0.00041   0.00024
   D43       -0.00005   0.00000  -0.00004  -0.00003  -0.00007  -0.00012
   D44        3.14151   0.00000  -0.00004  -0.00001  -0.00005   3.14146
   D45        3.14157   0.00000  -0.00002   0.00000  -0.00002   3.14155
   D46       -0.00006   0.00000  -0.00002   0.00002   0.00000  -0.00006
   D47       -3.14153   0.00000   0.00003   0.00001   0.00004  -3.14149
   D48        0.00003   0.00000   0.00002   0.00001   0.00003   0.00007
   D49        0.00003   0.00000   0.00001  -0.00001   0.00000   0.00003
   D50       -3.14159   0.00000   0.00000  -0.00001  -0.00001   3.14158
   D51       -3.14158   0.00000   0.00002   0.00001   0.00002  -3.14156
   D52        0.00002   0.00000   0.00001   0.00003   0.00004   0.00006
   D53        0.00005   0.00000   0.00002  -0.00001   0.00000   0.00005
   D54       -3.14154   0.00000   0.00001   0.00001   0.00002  -3.14151
   D55        0.00001   0.00000   0.00000   0.00001   0.00001   0.00002
   D56        3.14158   0.00000   0.00000   0.00001   0.00000   3.14158
   D57       -3.14156   0.00000   0.00001   0.00001   0.00002  -3.14154
   D58        0.00001   0.00000   0.00001   0.00001   0.00001   0.00003
   D59       -0.00002   0.00000   0.00000   0.00001   0.00000  -0.00001
   D60        3.14158   0.00000   0.00000   0.00001   0.00001   3.14159
   D61        3.14157   0.00000   0.00000  -0.00002  -0.00002   3.14155
   D62       -0.00002   0.00000   0.00000  -0.00001  -0.00001  -0.00003
   D63       -0.00001   0.00000  -0.00001   0.00000  -0.00001  -0.00002
   D64        3.14157   0.00000   0.00000  -0.00001  -0.00002   3.14156
   D65       -3.14159   0.00000   0.00000   0.00000   0.00000  -3.14159
   D66        0.00000   0.00000   0.00000  -0.00001  -0.00001  -0.00001
         Item               Value     Threshold  Converged?
 Maximum Force            0.036654     0.000450     NO 
 RMS     Force            0.003920     0.000300     NO 
 Maximum Displacement     0.109380     0.001800     NO 
 RMS     Displacement     0.015838     0.001200     NO 
 Predicted change in Energy=-2.785954D-03
 GradGradGradGradGradGradGradGradGradGradGradGradGradGradGradGradGradGrad

                          Input orientation:                          
 ---------------------------------------------------------------------
 Center     Atomic      Atomic             Coordinates (Angstroms)
 Number     Number       Type             X           Y           Z
 ---------------------------------------------------------------------
      1          6           0       -5.060703    0.071239   -0.000224
      2          6           0       -4.031895    0.991386   -0.000158
      3          6           0       -2.680823    0.561838   -0.000039
      4          6           0       -2.404872   -0.832610    0.000063
      5          6           0       -3.470846   -1.744176   -0.000016
      6          6           0       -4.783245   -1.306992   -0.000167
      7          1           0       -6.089035    0.415218   -0.000332
      8          1           0       -4.250508    2.050522   -0.000229
      9          1           0       -3.236092   -2.801322    0.000060
     10          1           0       -5.595416   -2.025245   -0.000229
     11          6           0       -1.027632   -1.336389    0.000298
     12          8           0       -0.766323   -2.546751   -0.000026
     13          6           0       -1.614466    1.501005   -0.000070
     14          6           0        0.033837   -0.315707    0.000070
     15          6           0       -0.264077    1.076175   -0.000038
     16          6           0        1.367842   -0.743216    0.000051
     17          6           0        0.816348    1.993591   -0.000088
     18          6           0        2.390530    0.182807   -0.000040
     19          1           0        1.563980   -1.806928    0.000143
     20          6           0        2.124796    1.561461   -0.000096
     21          1           0        0.653581    3.066471   -0.000095
     22          1           0        2.935295    2.278602   -0.000135
     23         35           0        4.212059   -0.413783   -0.000046
     24          8           0       -1.968029    2.786618    0.000435
     25          1           0       -1.216877    3.392495    0.000610
 ---------------------------------------------------------------------
                    Distance matrix (angstroms):
                    1          2          3          4          5
     1  C    0.000000
     2  C    1.380260   0.000000
     3  C    2.429922   1.417712   0.000000
     4  C    2.805420   2.444210   1.421490   0.000000
     5  C    2.413167   2.792503   2.437588   1.402588   0.000000
     6  C    1.405882   2.418071   2.812954   2.425222   1.383301
     7  H    1.084337   2.136304   3.411364   3.889747   3.393802
     8  H    2.138686   1.081463   2.163352   3.423277   3.873965
     9  H    3.403059   3.875298   3.408690   2.136997   1.082898
    10  H    2.163600   3.397744   3.897160   3.406164   2.143081
    11  C    4.271660   3.800543   2.517202   1.466486   2.477012
    12  O    5.029471   4.814808   3.650841   2.371313   2.821095
    13  C    3.731056   2.470561   1.420968   2.463838   3.738629
    14  C    5.109214   4.270675   2.852974   2.492887   3.784617
    15  C    4.900767   3.768772   2.470870   2.868181   4.270568
    16  C    6.479933   5.671508   4.253804   3.773773   4.941136
    17  C    6.183459   4.950745   3.778904   4.285285   5.687788
    18  C    7.452068   6.473125   5.085497   4.901729   6.170008
    19  H    6.885778   6.256547   4.861009   4.086696   5.035218
    20  C    7.338403   6.183028   4.908484   5.123423   6.499111
    21  H    6.451702   5.124418   4.170304   4.955499   6.336657
    22  H    8.295085   7.085101   5.872653   6.180374   7.564482
    23  Br   9.285438   8.362850   6.961584   6.630172   7.797241
    24  O    4.115570   2.735398   2.336176   3.645496   4.773526
    25  H    5.079935   3.699953   3.186809   4.388945   5.609435
                    6          7          8          9         10
     6  C    0.000000
     7  H    2.161271   0.000000
     8  H    3.399517   2.460569   0.000000
     9  H    2.150977   4.299466   4.956756   0.000000
    10  H    1.084209   2.489884   4.291929   2.483687   0.000000
    11  C    3.755728   5.355924   4.675264   2.650156   4.619434
    12  O    4.203887   6.091348   5.768403   2.482855   4.857171
    13  C    4.233912   4.604421   2.692710   4.597791   5.318120
    14  C    4.918021   6.166345   4.894349   4.107398   5.883112
    15  C    5.109048   5.862337   4.103777   4.885474   6.167818
    16  C    6.176870   7.546322   6.274618   5.043016   7.080294
    17  C    6.499946   7.083471   5.067176   6.278014   7.567150
    18  C    7.326838   8.482749   6.898678   6.368980   8.285580
    19  H    6.366884   7.969101   6.977693   4.901991   7.162724
    20  C    7.479911   8.293425   6.394035   6.911801   8.512704
    21  H    6.977554   7.245137   5.008218   7.039926   8.060741
    22  H    8.510720   9.214702   7.189422   7.993225   9.554901
    23  Br   9.039542  10.334397   8.814070   7.821464   9.938982
    24  O    4.968208   4.754601   2.398239   5.730014   6.025941
    25  H    5.899505   5.709825   3.317199   6.514644   6.965882
                   11         12         13         14         15
    11  C    0.000000
    12  O    1.238249   0.000000
    13  C    2.897443   4.135659   0.000000
    14  C    1.472586   2.370193   2.453027   0.000000
    15  C    2.530510   3.657573   1.415638   1.423407   0.000000
    16  C    2.467823   2.794172   3.732383   1.400833   2.444042
    17  C    3.806445   4.808279   2.480221   2.438274   1.417381
    18  C    3.740560   4.173273   4.216354   2.408842   2.800901
    19  H    2.633982   2.444923   4.587477   2.136605   3.413807
    20  C    4.281978   5.023542   3.739751   2.809959   2.437667
    21  H    4.712924   5.790025   2.755852   3.438489   2.191660
    22  H    5.364042   6.081612   4.615732   3.892158   3.417867
    23  Br   5.320297   5.416072   6.133091   4.179373   4.717602
    24  O    4.228892   5.467076   1.333345   3.692138   2.414346
    25  H    4.732669   5.956311   1.932825   3.913444   2.504629
                   16         17         18         19         20
    16  C    0.000000
    17  C    2.791819   0.000000
    18  C    1.379641   2.399373   0.000000
    19  H    1.081645   3.873358   2.154583   0.000000
    20  C    2.425801   1.377960   1.404030   3.414756   0.000000
    21  H    3.876065   1.085157   3.366380   4.957706   2.104645
    22  H    3.404158   2.138029   2.165439   4.309531   1.082220
    23  Br   2.863231   4.162487   1.916738   2.992185   2.873717
    24  O    4.856723   2.895107   5.077093   5.794459   4.272263
    25  H    4.876974   2.467982   4.828611   5.896369   3.810442
                   21         22         23         24         25
    21  H    0.000000
    22  H    2.413909   0.000000
    23  Br   4.977442   2.979775   0.000000
    24  O    2.636505   4.929571   6.959601   0.000000
    25  H    1.898659   4.298987   6.630316   0.965047   0.000000
 Stoichiometry    C14H8BrO2(2)
 Framework group  C1[X(C14H8BrO2)]
 Deg. of freedom    69
 Full point group                 C1      NOp   1
 Largest Abelian subgroup         C1      NOp   1
 Largest concise Abelian subgroup C1      NOp   1
                         Standard orientation:                         
 ---------------------------------------------------------------------
 Center     Atomic      Atomic             Coordinates (Angstroms)
 Number     Number       Type             X           Y           Z
 ---------------------------------------------------------------------
      1          6           0        5.051785    0.014502    0.000215
      2          6           0        4.030841    0.943366    0.000149
      3          6           0        2.676163    0.525326    0.000030
      4          6           0        2.388362   -0.866724   -0.000072
      5          6           0        3.446544   -1.787324    0.000007
      6          6           0        4.762614   -1.361320    0.000158
      7          1           0        6.083005    0.349722    0.000323
      8          1           0        4.258455    2.000605    0.000220
      9          1           0        3.202807   -2.842435   -0.000069
     10          1           0        5.568646   -2.086455    0.000220
     11          6           0        1.006887   -1.358770   -0.000306
     12          8           0        0.735292   -2.566866    0.000017
     13          6           0        1.617834    1.473529    0.000061
     14          6           0       -0.045862   -0.329096   -0.000078
     15          6           0        0.263880    1.060201    0.000029
     16          6           0       -1.383455   -0.745243   -0.000060
     17          6           0       -0.808702    1.986773    0.000079
     18          6           0       -2.398230    0.189444    0.000031
     19          1           0       -1.588634   -1.807249   -0.000152
     20          6           0       -2.120779    1.565788    0.000087
     21          1           0       -0.636816    3.058230    0.000086
     22          1           0       -2.925149    2.289797    0.000126
     23         35           0       -4.224767   -0.391630    0.000037
     24          8           0        1.982319    2.756089   -0.000444
     25          1           0        1.236348    3.368332   -0.000619
 ---------------------------------------------------------------------
 Rotational constants (GHZ):      0.9811332      0.1773564      0.1502044
 Standard basis: 6-311G(d) (5D, 7F)
 There are   375 symmetry adapted cartesian basis functions of A   symmetry.
 There are   356 symmetry adapted basis functions of A   symmetry.
   356 basis functions,   642 primitive gaussians,   375 cartesian basis functions
    72 alpha electrons       71 beta electrons
       nuclear repulsion energy      1393.3829970866 Hartrees.
 NAtoms=   25 NActive=   25 NUniq=   25 SFac= 1.00D+00 NAtFMM=   60 NAOKFM=F Big=F
 Integral buffers will be    262144 words long.
 Raffenetti 2 integral format.
 Two-electron integral symmetry is turned on.
 Nuclear repulsion after empirical dispersion term =     1393.3195706165 Hartrees.
 ------------------------------------------------------------------------------
 Polarizable Continuum Model (PCM)
 =================================
 Model                : PCM (using non-symmetric T matrix).
 Atomic radii         : UFF (Universal Force Field).
 Polarization charges : Total charges.
 Charge compensation  : None.
 Solution method      : On-the-fly selection.
 Cavity type          : Scaled VdW (van der Waals Surface) (Alpha=1.100).
 Cavity algorithm     : GePol (No added spheres)
                        Default sphere list used, NSphG=   25.
                        Lebedev-Laikov grids with approx.  5.0 points / Ang**2.
                        Smoothing algorithm: Karplus/York (Gamma=1.0000).
                        Polarization charges: spherical gaussians, with
                                              point-specific exponents (IZeta= 3).
                        Self-potential: point-specific (ISelfS= 7).
                        Self-field    : sphere-specific E.n sum rule (ISelfD= 2).
 1st derivatives      : Analytical E(r).r(x)/FMM algorithm (CHGder, D1EAlg=3).
                        Cavity 1st derivative terms included.
 Solvent              : Acetonitrile, Eps=  35.688000 Eps(inf)=   1.806874
 ------------------------------------------------------------------------------
 One-electron integrals computed using PRISM.
 NBasis=   356 RedAO= T EigKep=  8.49D-05  NBF=   356
 NBsUse=   356 1.00D-06 EigRej= -1.00D+00 NBFU=   356
 Initial guess from the checkpoint file:  "C:\Users\Shengfu Liao\Desktop\suppliment\HS2 opt.chk"
 B after Tr=     0.000000    0.000000    0.000000
         Rot=    1.000000    0.000011    0.000004   -0.000963 Ang=   0.11 deg.
 Initial guess <Sx>= 0.0000 <Sy>= 0.0000 <Sz>= 0.5000 <S**2>= 0.7697 S= 0.5098
 ExpMin= 1.03D-01 ExpMax= 4.40D+05 ExpMxC= 1.51D+04 IAcc=2 IRadAn=         4 AccDes= 0.00D+00
 Harris functional with IExCor=  402 and IRadAn=       4 diagonalized for initial guess.
 HarFok:  IExCor=  402 AccDes= 0.00D+00 IRadAn=         4 IDoV= 1 UseB2=F ITyADJ=14
 ICtDFT=  3500011 ScaDFX=  1.000000  1.000000  1.000000  1.000000
 FoFCou: FMM=F IPFlag=           0 FMFlag=      100000 FMFlg1=           0
         NFxFlg=           0 DoJE=T BraDBF=F KetDBF=T FulRan=T
         wScrn=  0.000000 ICntrl=     500 IOpCl=  0 I1Cent=   200000004 NGrid=           0
         NMat0=    1 NMatS0=      1 NMatT0=    0 NMatD0=    1 NMtDS0=    0 NMtDT0=    0
 Petite list used in FoFCou.
 Requested convergence on RMS density matrix=1.00D-08 within 128 cycles.
 Requested convergence on MAX density matrix=1.00D-06.
 Requested convergence on             energy=1.00D-06.
 No special actions if energy rises.
 Inv3:  Mode=1 IEnd=    14375163.
 Iteration    1 A*A^-1 deviation from unit magnitude is 2.55D-15 for   1024.
 Iteration    1 A*A^-1 deviation from orthogonality  is 2.68D-15 for   1617   1474.
 Iteration    1 A^-1*A deviation from unit magnitude is 2.33D-15 for   1882.
 Iteration    1 A^-1*A deviation from orthogonality  is 6.56D-13 for   1344    872.
 Error on total polarization charges =  0.01436
 SCF Done:  E(UB3LYP) =  -3263.12365643     A.U. after   15 cycles
            NFock= 15  Conv=0.83D-08     -V/T= 2.0017
 <Sx>= 0.0000 <Sy>= 0.0000 <Sz>= 0.5000 <S**2>= 0.7716 S= 0.5107
 <L.S>= 0.000000000000E+00
 Annihilation of the first spin contaminant:
 S**2 before annihilation     0.7716,   after     0.7504
 D1PCM: PCM CHGder 1st derivatives, ID1Alg=3 FixD1E=F DoIter=F DoCFld=F I1PDM=0.
 Calling FoFJK, ICntrl=      2127 FMM=F ISym2X=0 I1Cent= 0 IOpClX= 1 NMat=1 NMatS=1 NMatT=0.
 ***** Axes restored to original set *****
 -------------------------------------------------------------------
 Center     Atomic                   Forces (Hartrees/Bohr)
 Number     Number              X              Y              Z
 -------------------------------------------------------------------
      1        6           0.000461631    0.000122366    0.000000118
      2        6           0.000568285   -0.000957323   -0.000000190
      3        6          -0.005422959   -0.001354354   -0.000009993
      4        6          -0.002027489   -0.000796834    0.000020355
      5        6           0.000111057   -0.000220346    0.000001052
      6        6           0.000286338   -0.000134299   -0.000000027
      7        1           0.000015565    0.000000252    0.000000148
      8        1           0.000410682    0.000417282    0.000000165
      9        1           0.000169780   -0.000095371    0.000000048
     10        1           0.000007860    0.000160244   -0.000000147
     11        6           0.000056675    0.001767632   -0.000087063
     12        8           0.000269038   -0.000160346    0.000033738
     13        6           0.000898070   -0.006643061    0.000043474
     14        6           0.002609878   -0.001705770    0.000021181
     15        6           0.004949272    0.000742012   -0.000003611
     16        6          -0.000184157    0.000080450    0.000000668
     17        6           0.002516045   -0.000150020    0.000002953
     18        6           0.000615360   -0.000526126   -0.000000973
     19        1          -0.000009443   -0.000197647   -0.000000225
     20        6          -0.000619118    0.000119694    0.000000397
     21        1          -0.000378010   -0.000577574   -0.000004210
     22        1           0.000118405   -0.000086798    0.000000046
     23       35          -0.000672975    0.000345803   -0.000000340
     24        8          -0.004923344    0.011609506   -0.000014485
     25        1           0.000173553   -0.001759372   -0.000003078
 -------------------------------------------------------------------
 Cartesian Forces:  Max     0.011609506 RMS     0.001972026

 GradGradGradGradGradGradGradGradGradGradGradGradGradGradGradGradGradGrad
 Berny optimization.
 Using GEDIIS/GDIIS optimizer.
 FormGI is forming the generalized inverse of G from B-inverse, IUseBI=4.
 Internal  Forces:  Max     0.010754583 RMS     0.001306515
 Search for a local minimum.
 Step number   3 out of a maximum of  146
 All quantities printed in internal units (Hartrees-Bohrs-Radians)
 Mixed Optimization -- RFO/linear search
 Update second derivatives using D2CorX and points    1    2    3
 DE= -2.94D-03 DEPred=-2.79D-03 R= 1.05D+00
 TightC=F SS=  1.41D+00  RLast= 1.40D-01 DXNew= 8.4853D-01 4.2050D-01
 Trust test= 1.05D+00 RLast= 1.40D-01 DXMaxT set to 5.05D-01
 ITU=  1  1  0
 Use linear search instead of GDIIS.
     Eigenvalues ---    0.00885   0.00897   0.01267   0.01533   0.01585
     Eigenvalues ---    0.01672   0.01725   0.01803   0.01860   0.02148
     Eigenvalues ---    0.02148   0.02160   0.02165   0.02168   0.02171
     Eigenvalues ---    0.02177   0.02184   0.02191   0.02194   0.02199
     Eigenvalues ---    0.02216   0.04043   0.15660   0.16000   0.16000
     Eigenvalues ---    0.16000   0.16000   0.16000   0.16013   0.17317
     Eigenvalues ---    0.17566   0.21596   0.22093   0.22476   0.22614
     Eigenvalues ---    0.23541   0.24504   0.24701   0.25000   0.25000
     Eigenvalues ---    0.25000   0.25078   0.27522   0.32158   0.33036
     Eigenvalues ---    0.34701   0.35472   0.35476   0.35552   0.35613
     Eigenvalues ---    0.35665   0.35672   0.35741   0.36584   0.39267
     Eigenvalues ---    0.41268   0.42286   0.42844   0.44890   0.45009
     Eigenvalues ---    0.45685   0.46238   0.46693   0.46970   0.47173
     Eigenvalues ---    0.47348   0.55586   0.64774   0.94813
 RFO step:  Lambda=-5.53563482D-04 EMin= 8.85076441D-03
 Quartic linear search produced a step of  0.02896.
 Iteration  1 RMS(Cart)=  0.00804545 RMS(Int)=  0.00002021
 Iteration  2 RMS(Cart)=  0.00003512 RMS(Int)=  0.00000100
 Iteration  3 RMS(Cart)=  0.00000000 RMS(Int)=  0.00000100
 Variable       Old X    -DE/DX   Delta X   Delta X   Delta X     New X
                                 (Linear)    (Quad)   (Total)
    R1        2.60831  -0.00033  -0.00021  -0.00138  -0.00159   2.60672
    R2        2.65673   0.00022   0.00017   0.00110   0.00127   2.65800
    R3        2.04910  -0.00001   0.00000  -0.00003  -0.00003   2.04907
    R4        2.67909  -0.00160   0.00045  -0.00237  -0.00192   2.67717
    R5        2.04367   0.00033  -0.00011   0.00072   0.00061   2.04428
    R6        2.68623   0.00011   0.00030   0.00091   0.00121   2.68744
    R7        2.68524   0.00409  -0.00103   0.00924   0.00820   2.69344
    R8        2.65051  -0.00037   0.00015  -0.00041  -0.00026   2.65025
    R9        2.77126   0.00139  -0.00032   0.00268   0.00236   2.77361
   R10        2.61406  -0.00016  -0.00020  -0.00079  -0.00099   2.61307
   R11        2.04638   0.00012   0.00001   0.00036   0.00037   2.04675
   R12        2.04886  -0.00012   0.00000  -0.00035  -0.00035   2.04851
   R13        2.33995   0.00021   0.00032   0.00126   0.00158   2.34153
   R14        2.78278   0.00046  -0.00029   0.00014  -0.00016   2.78263
   R15        2.67517   0.00752  -0.00224   0.01780   0.01557   2.69073
   R16        2.51966   0.01075   0.00195   0.01824   0.02019   2.53985
   R17        2.68985   0.00131   0.00025   0.00427   0.00452   2.69437
   R18        2.64719  -0.00032   0.00015  -0.00031  -0.00015   2.64704
   R19        2.67846   0.00091   0.00013   0.00293   0.00306   2.68152
   R20        2.60714  -0.00029  -0.00015  -0.00125  -0.00140   2.60574
   R21        2.04401   0.00020   0.00000   0.00056   0.00056   2.04457
   R22        2.60397  -0.00030  -0.00016  -0.00126  -0.00142   2.60255
   R23        2.05065  -0.00052  -0.00002  -0.00149  -0.00151   2.04914
   R24        2.65323   0.00006   0.00026   0.00064   0.00090   2.65413
   R25        3.62211  -0.00074   0.00001  -0.00430  -0.00428   3.61783
   R26        2.04510   0.00003  -0.00001   0.00005   0.00003   2.04513
   R27        1.82367  -0.00096  -0.00008  -0.00179  -0.00187   1.82181
    A1        2.10184   0.00016   0.00012   0.00109   0.00121   2.10305
    A2        2.08909  -0.00010  -0.00003  -0.00060  -0.00063   2.08845
    A3        2.09226  -0.00006  -0.00009  -0.00048  -0.00057   2.09168
    A4        2.10407  -0.00018   0.00011  -0.00088  -0.00077   2.10330
    A5        2.09695   0.00059  -0.00012   0.00342   0.00330   2.10025
    A6        2.08217  -0.00041   0.00001  -0.00254  -0.00253   2.07964
    A7        2.07399   0.00031  -0.00031   0.00016  -0.00015   2.07384
    A8        2.11170   0.00040   0.00084   0.00371   0.00455   2.11626
    A9        2.09749  -0.00071  -0.00053  -0.00388  -0.00441   2.09309
   A10        2.08290   0.00023   0.00004   0.00129   0.00133   2.08423
   A11        2.11684  -0.00016  -0.00019  -0.00180  -0.00200   2.11484
   A12        2.08345  -0.00007   0.00015   0.00052   0.00067   2.08411
   A13        2.11256  -0.00054   0.00015  -0.00186  -0.00171   2.11085
   A14        2.05975   0.00013  -0.00016  -0.00023  -0.00039   2.05936
   A15        2.11087   0.00041   0.00001   0.00209   0.00210   2.11297
   A16        2.09101   0.00003  -0.00012   0.00020   0.00008   2.09110
   A17        2.09625  -0.00015   0.00003  -0.00102  -0.00099   2.09526
   A18        2.09593   0.00011   0.00009   0.00081   0.00090   2.09683
   A19        2.13410  -0.00102  -0.00003  -0.00365  -0.00367   2.13042
   A20        2.02511   0.00257   0.00001   0.00936   0.00937   2.03448
   A21        2.12398  -0.00154   0.00002  -0.00571  -0.00569   2.11829
   A22        2.11473   0.00016   0.00116   0.00461   0.00577   2.12050
   A23        2.02448  -0.00119  -0.00044  -0.00751  -0.00795   2.01653
   A24        2.14397   0.00103  -0.00072   0.00290   0.00218   2.14615
   A25        2.12575  -0.00056  -0.00010  -0.00254  -0.00263   2.12312
   A26        2.06565  -0.00020   0.00025  -0.00067  -0.00042   2.06523
   A27        2.09178   0.00076  -0.00015   0.00321   0.00306   2.09484
   A28        2.08645  -0.00131  -0.00035  -0.00575  -0.00610   2.08035
   A29        2.13281   0.00254   0.00033   0.01099   0.01131   2.14413
   A30        2.06393  -0.00124   0.00002  -0.00524  -0.00521   2.05871
   A31        2.09563  -0.00014   0.00013  -0.00041  -0.00028   2.09535
   A32        2.06327   0.00002  -0.00022  -0.00052  -0.00073   2.06253
   A33        2.12429   0.00012   0.00009   0.00093   0.00101   2.12530
   A34        2.11862   0.00031   0.00000   0.00188   0.00188   2.12050
   A35        2.12422  -0.00062   0.00003  -0.00318  -0.00315   2.12107
   A36        2.04034   0.00031  -0.00003   0.00130   0.00127   2.04161
   A37        2.11622  -0.00001  -0.00006  -0.00068  -0.00074   2.11547
   A38        2.08925   0.00019   0.00009   0.00131   0.00140   2.09065
   A39        2.07772  -0.00019  -0.00003  -0.00063  -0.00066   2.07706
   A40        2.08019   0.00031   0.00006   0.00124   0.00130   2.08149
   A41        2.09825   0.00000  -0.00006   0.00033   0.00027   2.09852
   A42        2.10474  -0.00031   0.00000  -0.00157  -0.00157   2.10317
   A43        1.98117  -0.00271  -0.00138  -0.01895  -0.02033   1.96084
    D1        0.00001   0.00000   0.00000   0.00000   0.00000   0.00001
    D2        3.14156   0.00000   0.00000   0.00008   0.00008  -3.14154
    D3       -3.14157   0.00000   0.00000  -0.00004  -0.00004   3.14157
    D4       -0.00002   0.00000   0.00000   0.00005   0.00005   0.00003
    D5        0.00002   0.00000   0.00000  -0.00005  -0.00004  -0.00002
    D6       -3.14158   0.00000   0.00000   0.00000   0.00000  -3.14159
    D7       -3.14158   0.00000   0.00000  -0.00001  -0.00001  -3.14159
    D8        0.00000   0.00000   0.00000   0.00003   0.00003   0.00003
    D9       -0.00004   0.00000   0.00000   0.00008   0.00008   0.00004
   D10        3.14151   0.00000   0.00000   0.00020   0.00020  -3.14147
   D11        3.14159   0.00000   0.00000   0.00000   0.00000   3.14158
   D12       -0.00005   0.00000   0.00000   0.00012   0.00012   0.00007
   D13        0.00005   0.00000   0.00000  -0.00012  -0.00012  -0.00007
   D14       -3.14151   0.00000   0.00000  -0.00026  -0.00026   3.14142
   D15       -3.14150   0.00000   0.00000  -0.00024  -0.00023   3.14145
   D16        0.00013  -0.00001   0.00000  -0.00038  -0.00038  -0.00025
   D17       -3.14152   0.00000   0.00000  -0.00042  -0.00042   3.14125
   D18        0.00054  -0.00001   0.00003  -0.00100  -0.00096  -0.00042
   D19        0.00003   0.00000   0.00000  -0.00030  -0.00030  -0.00027
   D20       -3.14109  -0.00001   0.00003  -0.00087  -0.00085   3.14125
   D21       -0.00002   0.00000   0.00000   0.00007   0.00007   0.00005
   D22        3.14159   0.00000   0.00000   0.00000   0.00000   3.14159
   D23        3.14153   0.00000   0.00000   0.00022   0.00021  -3.14144
   D24       -0.00004   0.00000   0.00000   0.00014   0.00014   0.00010
   D25       -3.14120  -0.00002   0.00002  -0.00175  -0.00173   3.14026
   D26       -0.00026   0.00001   0.00000   0.00098   0.00097   0.00071
   D27        0.00044  -0.00002   0.00002  -0.00189  -0.00187  -0.00144
   D28        3.14137   0.00001   0.00000   0.00083   0.00083  -3.14099
   D29       -0.00002   0.00000   0.00000   0.00001   0.00001  -0.00001
   D30        3.14159   0.00000   0.00000  -0.00003  -0.00003   3.14156
   D31        3.14156   0.00000   0.00000   0.00009   0.00008  -3.14154
   D32       -0.00002   0.00000   0.00000   0.00005   0.00004   0.00003
   D33        0.00026  -0.00001   0.00000  -0.00097  -0.00096  -0.00070
   D34       -3.14141  -0.00001   0.00000  -0.00075  -0.00075   3.14103
   D35        3.14120   0.00002  -0.00002   0.00174   0.00172  -3.14027
   D36       -0.00047   0.00002  -0.00002   0.00195   0.00193   0.00146
   D37       -0.00003   0.00000   0.00000   0.00031   0.00031   0.00028
   D38        3.14158   0.00000   0.00000   0.00029   0.00029  -3.14132
   D39        3.14105   0.00001  -0.00003   0.00093   0.00090  -3.14123
   D40       -0.00052   0.00001  -0.00003   0.00091   0.00088   0.00036
   D41        3.14135   0.00001  -0.00002   0.00034   0.00032  -3.14152
   D42        0.00024   0.00000   0.00001  -0.00025  -0.00024   0.00000
   D43       -0.00012   0.00001   0.00000   0.00035   0.00035   0.00023
   D44        3.14146   0.00001   0.00000   0.00037   0.00036  -3.14136
   D45        3.14155   0.00000   0.00000   0.00013   0.00013  -3.14150
   D46       -0.00006   0.00000   0.00000   0.00015   0.00015   0.00009
   D47       -3.14149   0.00000   0.00000  -0.00029  -0.00029   3.14140
   D48        0.00007   0.00000   0.00000  -0.00019  -0.00019  -0.00012
   D49        0.00003   0.00000   0.00000  -0.00008  -0.00008  -0.00006
   D50        3.14158   0.00000   0.00000   0.00002   0.00002  -3.14158
   D51       -3.14156   0.00000   0.00000  -0.00010  -0.00010   3.14152
   D52        0.00006   0.00000   0.00000  -0.00013  -0.00012  -0.00006
   D53        0.00005   0.00000   0.00000  -0.00012  -0.00012  -0.00007
   D54       -3.14151   0.00000   0.00000  -0.00014  -0.00014   3.14153
   D55        0.00002   0.00000   0.00000  -0.00002  -0.00002   0.00000
   D56        3.14158   0.00000   0.00000   0.00006   0.00006  -3.14154
   D57       -3.14154   0.00000   0.00000  -0.00013  -0.00013   3.14152
   D58        0.00003   0.00000   0.00000  -0.00005  -0.00005  -0.00002
   D59       -0.00001   0.00000   0.00000   0.00002   0.00002   0.00001
   D60        3.14159   0.00000   0.00000   0.00001   0.00001  -3.14158
   D61        3.14155   0.00000   0.00000   0.00004   0.00004  -3.14159
   D62       -0.00003   0.00000   0.00000   0.00003   0.00003   0.00001
   D63       -0.00002   0.00000   0.00000   0.00005   0.00005   0.00003
   D64        3.14156   0.00000   0.00000   0.00006   0.00006  -3.14157
   D65       -3.14159   0.00000   0.00000  -0.00003  -0.00003   3.14157
   D66       -0.00001   0.00000   0.00000  -0.00002  -0.00002  -0.00003
         Item               Value     Threshold  Converged?
 Maximum Force            0.010755     0.000450     NO 
 RMS     Force            0.001307     0.000300     NO 
 Maximum Displacement     0.031796     0.001800     NO 
 RMS     Displacement     0.008045     0.001200     NO 
 Predicted change in Energy=-2.795975D-04
 GradGradGradGradGradGradGradGradGradGradGradGradGradGradGradGradGradGrad

                          Input orientation:                          
 ---------------------------------------------------------------------
 Center     Atomic      Atomic             Coordinates (Angstroms)
 Number     Number       Type             X           Y           Z
 ---------------------------------------------------------------------
      1          6           0       -5.065575    0.065871    0.000227
      2          6           0       -4.041162    0.989650    0.000060
      3          6           0       -2.689642    0.564893   -0.000228
      4          6           0       -2.409143   -0.829300   -0.000391
      5          6           0       -3.470898   -1.745564   -0.000179
      6          6           0       -4.784017   -1.312213    0.000122
      7          1           0       -6.095073    0.406293    0.000466
      8          1           0       -4.260674    2.048928    0.000193
      9          1           0       -3.230928   -2.801738   -0.000315
     10          1           0       -5.594690   -2.031878    0.000249
     11          6           0       -1.028144   -1.326375   -0.000908
     12          8           0       -0.764848   -2.537160    0.000342
     13          6           0       -1.618868    1.505608   -0.000260
     14          6           0        0.037538   -0.310213   -0.000307
     15          6           0       -0.258697    1.084473   -0.000130
     16          6           0        1.369478   -0.743856   -0.000074
     17          6           0        0.829161    1.995585    0.000171
     18          6           0        2.395625    0.177221    0.000260
     19          1           0        1.559969   -1.808895   -0.000228
     20          6           0        2.134765    1.557290    0.000370
     21          1           0        0.670407    3.068261    0.000261
     22          1           0        2.948976    2.270242    0.000610
     23         35           0        4.213241   -0.424006    0.000497
     24          8           0       -1.983962    2.799102   -0.000513
     25          1           0       -1.225411    3.394091   -0.000592
 ---------------------------------------------------------------------
                    Distance matrix (angstroms):
                    1          2          3          4          5
     1  C    0.000000
     2  C    1.379416   0.000000
     3  C    2.427773   1.416695   0.000000
     4  C    2.803206   2.443781   1.422129   0.000000
     5  C    2.413358   2.794029   2.438970   1.402450   0.000000
     6  C    1.406553   2.418761   2.812461   2.423476   1.382779
     7  H    1.084321   2.135147   3.409122   3.887515   3.393639
     8  H    2.140183   1.081784   2.161135   3.422333   3.875812
     9  H    3.404278   3.876996   3.409867   2.136784   1.083092
    10  H    2.163449   3.397510   3.896475   3.404982   2.143004
    11  C    4.270738   3.800296   2.517433   1.467733   2.478460
    12  O    5.027130   4.813795   3.650694   2.370758   2.819456
    13  C    3.735322   2.476635   1.425307   2.465021   3.741675
    14  C    5.116953   4.280822   2.864144   2.501140   3.790694
    15  C    4.913616   3.783653   2.485851   2.878704   4.281044
    16  C    6.485797   5.681555   4.264889   3.779586   4.942940
    17  C    6.202556   4.973122   3.798533   4.297276   5.699711
    18  C    7.462031   6.487855   5.100023   4.909061   6.173589
    19  H    6.885679   6.261351   4.867654   4.088209   5.031265
    20  C    7.353179   6.201959   4.925420   5.132535   6.506328
    21  H    6.474244   5.149709   4.190081   4.967354   6.350065
    22  H    8.312177   7.106472   5.890860   6.190040   7.572416
    23  Br   9.291739   8.374580   6.973357   6.634774   7.796955
    24  O    4.119089   2.739743   2.343005   3.653228   4.781733
    25  H    5.081723   3.702673   3.185645   4.386142   5.608767
                    6          7          8          9         10
     6  C    0.000000
     7  H    2.161511   0.000000
     8  H    3.401641   2.462371   0.000000
     9  H    2.151922   4.300556   4.958764   0.000000
    10  H    1.084023   2.488988   4.293318   2.485971   0.000000
    11  C    3.755900   5.354989   4.673534   2.651218   4.620722
    12  O    4.201693   6.088942   5.766542   2.480233   4.856201
    13  C    4.237722   4.609219   2.697097   4.599126   5.321744
    14  C    4.924572   6.174326   4.903078   4.109814   5.889493
    15  C    5.120803   5.875645   4.116551   4.892524   6.179357
    16  C    6.179687   7.552639   6.284763   5.039704   7.082276
    17  C    6.515312   7.104284   5.090114   6.284793   7.581972
    18  C    7.332509   8.493787   6.914449   6.366498   8.290069
    19  H    6.363399   7.969110   6.983028   4.892692   7.158132
    20  C    7.490234   8.309936   6.414308   6.913161   8.522124
    21  H    6.995663   7.270336   5.035335   7.048213   8.078543
    22  H    8.522510   9.234128   7.213046   7.994761   9.565692
    23  Br   9.040993  10.341698   8.827380   7.814683   9.938851
    24  O    4.974256   4.756760   2.397119   5.737973   6.031229
    25  H    5.900252   5.713190   3.319982   6.512326   6.966472
                   11         12         13         14         15
    11  C    0.000000
    12  O    1.239083   0.000000
    13  C    2.892937   4.131988   0.000000
    14  C    1.472503   2.367091   2.457822   0.000000
    15  C    2.530659   3.656831   1.423875   1.425799   0.000000
    16  C    2.467371   2.787702   3.740361   1.400753   2.448212
    17  C    3.805916   4.804856   2.496582   2.437903   1.419000
    18  C    3.739385   4.166108   4.228566   2.407938   2.805091
    19  H    2.632708   2.436215   4.592486   2.136315   3.417473
    20  C    4.280131   5.017198   3.753990   2.808190   2.439717
    21  H    4.711465   5.786251   2.771762   3.437239   2.190582
    22  H    5.362196   6.074833   4.631400   3.890401   3.419827
    23  Br   5.318495   5.408030   6.143037   4.177252   4.719506
    24  O    4.234754   5.473749   1.344031   3.708679   2.432383
    25  H    4.724586   5.949105   1.929035   3.913682   2.503771
                   16         17         18         19         20
    16  C    0.000000
    17  C    2.792218   0.000000
    18  C    1.378899   2.400054   0.000000
    19  H    1.081940   3.874035   2.154757   0.000000
    20  C    2.425065   1.377210   1.404506   3.414907   0.000000
    21  H    3.875685   1.084360   3.366673   4.957617   2.104134
    22  H    3.402881   2.137535   2.164932   4.309141   1.082238
    23  Br   2.861694   4.160098   1.914471   2.992953   2.871514
    24  O    4.878330   2.925627   5.104413   5.813181   4.301861
    25  H    4.884266   2.485374   4.843568   5.901643   3.829442
                   21         22         23         24         25
    21  H    0.000000
    22  H    2.414273   0.000000
    23  Br   4.974696   2.976128   0.000000
    24  O    2.667980   4.961206   6.985252   0.000000
    25  H    1.923614   4.323025   6.645058   0.964059   0.000000
 Stoichiometry    C14H8BrO2(2)
 Framework group  C1[X(C14H8BrO2)]
 Deg. of freedom    69
 Full point group                 C1      NOp   1
 Largest Abelian subgroup         C1      NOp   1
 Largest concise Abelian subgroup C1      NOp   1
                         Standard orientation:                         
 ---------------------------------------------------------------------
 Center     Atomic      Atomic             Coordinates (Angstroms)
 Number     Number       Type             X           Y           Z
 ---------------------------------------------------------------------
      1          6           0        5.056399    0.001762   -0.000164
      2          6           0        4.041401    0.935876    0.000003
      3          6           0        2.685645    0.524839    0.000291
      4          6           0        2.391030   -0.866439    0.000454
      5          6           0        3.443443   -1.793418    0.000242
      6          6           0        4.760888   -1.373398   -0.000058
      7          1           0        6.089293    0.331732   -0.000403
      8          1           0        4.271638    1.992875   -0.000129
      9          1           0        3.192782   -2.847105    0.000378
     10          1           0        5.564224   -2.101242   -0.000186
     11          6           0        1.005064   -1.349491    0.000971
     12          8           0        0.729509   -2.557546   -0.000279
     13          6           0        1.624461    1.476359    0.000323
     14          6           0       -0.050265   -0.322581    0.000370
     15          6           0        0.260092    1.069031    0.000193
     16          6           0       -1.386531   -0.742702    0.000137
     17          6           0       -0.818476    1.991122   -0.000108
     18          6           0       -2.403290    0.188729   -0.000196
     19          1           0       -1.587807   -1.805755    0.000292
     20          6           0       -2.128456    1.566083   -0.000306
     21          1           0       -0.648858    3.062134   -0.000198
     22          1           0       -2.935399    2.287250   -0.000546
     23         35           0       -4.226906   -0.394045   -0.000433
     24          8           0        2.002646    2.766086    0.000576
     25          1           0        1.250165    3.368732    0.000655
 ---------------------------------------------------------------------
 Rotational constants (GHZ):      0.9793503      0.1769940      0.1499027
 Standard basis: 6-311G(d) (5D, 7F)
 There are   375 symmetry adapted cartesian basis functions of A   symmetry.
 There are   356 symmetry adapted basis functions of A   symmetry.
   356 basis functions,   642 primitive gaussians,   375 cartesian basis functions
    72 alpha electrons       71 beta electrons
       nuclear repulsion energy      1392.1667088096 Hartrees.
 NAtoms=   25 NActive=   25 NUniq=   25 SFac= 1.00D+00 NAtFMM=   60 NAOKFM=F Big=F
 Integral buffers will be    262144 words long.
 Raffenetti 2 integral format.
 Two-electron integral symmetry is turned on.
 Nuclear repulsion after empirical dispersion term =     1392.1033448228 Hartrees.
 ------------------------------------------------------------------------------
 Polarizable Continuum Model (PCM)
 =================================
 Model                : PCM (using non-symmetric T matrix).
 Atomic radii         : UFF (Universal Force Field).
 Polarization charges : Total charges.
 Charge compensation  : None.
 Solution method      : On-the-fly selection.
 Cavity type          : Scaled VdW (van der Waals Surface) (Alpha=1.100).
 Cavity algorithm     : GePol (No added spheres)
                        Default sphere list used, NSphG=   25.
                        Lebedev-Laikov grids with approx.  5.0 points / Ang**2.
                        Smoothing algorithm: Karplus/York (Gamma=1.0000).
                        Polarization charges: spherical gaussians, with
                                              point-specific exponents (IZeta= 3).
                        Self-potential: point-specific (ISelfS= 7).
                        Self-field    : sphere-specific E.n sum rule (ISelfD= 2).
 1st derivatives      : Analytical E(r).r(x)/FMM algorithm (CHGder, D1EAlg=3).
                        Cavity 1st derivative terms included.
 Solvent              : Acetonitrile, Eps=  35.688000 Eps(inf)=   1.806874
 ------------------------------------------------------------------------------
 One-electron integrals computed using PRISM.
 NBasis=   356 RedAO= T EigKep=  8.54D-05  NBF=   356
 NBsUse=   356 1.00D-06 EigRej= -1.00D+00 NBFU=   356
 Initial guess from the checkpoint file:  "C:\Users\Shengfu Liao\Desktop\suppliment\HS2 opt.chk"
 B after Tr=     0.000000    0.000000    0.000000
         Rot=    1.000000   -0.000029    0.000033    0.000385 Ang=  -0.04 deg.
 Initial guess <Sx>= 0.0000 <Sy>= 0.0000 <Sz>= 0.5000 <S**2>= 0.7717 S= 0.5108
 ExpMin= 1.03D-01 ExpMax= 4.40D+05 ExpMxC= 1.51D+04 IAcc=2 IRadAn=         4 AccDes= 0.00D+00
 Harris functional with IExCor=  402 and IRadAn=       4 diagonalized for initial guess.
 HarFok:  IExCor=  402 AccDes= 0.00D+00 IRadAn=         4 IDoV= 1 UseB2=F ITyADJ=14
 ICtDFT=  3500011 ScaDFX=  1.000000  1.000000  1.000000  1.000000
 FoFCou: FMM=F IPFlag=           0 FMFlag=      100000 FMFlg1=           0
         NFxFlg=           0 DoJE=T BraDBF=F KetDBF=T FulRan=T
         wScrn=  0.000000 ICntrl=     500 IOpCl=  0 I1Cent=   200000004 NGrid=           0
         NMat0=    1 NMatS0=      1 NMatT0=    0 NMatD0=    1 NMtDS0=    0 NMtDT0=    0
 Petite list used in FoFCou.
 Requested convergence on RMS density matrix=1.00D-08 within 128 cycles.
 Requested convergence on MAX density matrix=1.00D-06.
 Requested convergence on             energy=1.00D-06.
 No special actions if energy rises.
 Inv3:  Mode=1 IEnd=    14454075.
 Iteration    1 A*A^-1 deviation from unit magnitude is 3.33D-15 for    200.
 Iteration    1 A*A^-1 deviation from orthogonality  is 2.50D-15 for   1873    980.
 Iteration    1 A^-1*A deviation from unit magnitude is 2.44D-15 for    708.
 Iteration    1 A^-1*A deviation from orthogonality  is 4.92D-12 for   1347    871.
 Error on total polarization charges =  0.01435
 SCF Done:  E(UB3LYP) =  -3263.12394815     A.U. after   13 cycles
            NFock= 13  Conv=0.84D-08     -V/T= 2.0017
 <Sx>= 0.0000 <Sy>= 0.0000 <Sz>= 0.5000 <S**2>= 0.7721 S= 0.5110
 <L.S>= 0.000000000000E+00
 Annihilation of the first spin contaminant:
 S**2 before annihilation     0.7721,   after     0.7504
 D1PCM: PCM CHGder 1st derivatives, ID1Alg=3 FixD1E=F DoIter=F DoCFld=F I1PDM=0.
 Calling FoFJK, ICntrl=      2127 FMM=F ISym2X=0 I1Cent= 0 IOpClX= 1 NMat=1 NMatS=1 NMatT=0.
 ***** Axes restored to original set *****
 -------------------------------------------------------------------
 Center     Atomic                   Forces (Hartrees/Bohr)
 Number     Number              X              Y              Z
 -------------------------------------------------------------------
      1        6          -0.000185460   -0.000648550    0.000001248
      2        6           0.001320880    0.000307865    0.000002112
      3        6          -0.000917906   -0.001221244   -0.000003138
      4        6          -0.000784368    0.000348879   -0.000074170
      5        6           0.000724653   -0.000266600   -0.000003318
      6        6          -0.000203492    0.000526374    0.000001706
      7        1          -0.000014599   -0.000039415   -0.000000947
      8        1           0.000077192    0.000142210   -0.000000301
      9        1           0.000011762    0.000030294    0.000000654
     10        1          -0.000042324    0.000051081    0.000001066
     11        6           0.000217017   -0.000829172    0.000266374
     12        8          -0.000291855    0.000621745   -0.000105718
     13        6           0.000263382   -0.002412488   -0.000015532
     14        6           0.000540111    0.000577014   -0.000074693
     15        6           0.000972094    0.000092582   -0.000009564
     16        6          -0.000695054   -0.000293755   -0.000001939
     17        6          -0.000601946    0.000023730   -0.000000099
     18        6           0.000371860    0.000451927    0.000002110
     19        1          -0.000035315    0.000055429    0.000000620
     20        6          -0.000114082   -0.000553581    0.000000385
     21        1          -0.000522792    0.000143566    0.000002897
     22        1           0.000011597    0.000015738   -0.000000521
     23       35          -0.000032494    0.000043029    0.000000857
     24        8          -0.000459288    0.002619270    0.000008752
     25        1           0.000390427    0.000214072    0.000001158
 -------------------------------------------------------------------
 Cartesian Forces:  Max     0.002619270 RMS     0.000568587

 GradGradGradGradGradGradGradGradGradGradGradGradGradGradGradGradGradGrad
 Berny optimization.
 Using GEDIIS/GDIIS optimizer.
 FormGI is forming the generalized inverse of G from B-inverse, IUseBI=4.
 Internal  Forces:  Max     0.002742804 RMS     0.000355703
 Search for a local minimum.
 Step number   4 out of a maximum of  146
 All quantities printed in internal units (Hartrees-Bohrs-Radians)
 Mixed Optimization -- En-DIIS/RFO-DIIS
 Update second derivatives using D2CorX and points    1    2    3    4
 DE= -2.92D-04 DEPred=-2.80D-04 R= 1.04D+00
 TightC=F SS=  1.41D+00  RLast= 4.21D-02 DXNew= 8.4853D-01 1.2632D-01
 Trust test= 1.04D+00 RLast= 4.21D-02 DXMaxT set to 5.05D-01
 ITU=  1  1  1  0
 Use linear search instead of GDIIS.
     Eigenvalues ---    0.00886   0.00897   0.01264   0.01533   0.01583
     Eigenvalues ---    0.01672   0.01725   0.01802   0.01859   0.02148
     Eigenvalues ---    0.02148   0.02160   0.02165   0.02169   0.02171
     Eigenvalues ---    0.02177   0.02184   0.02191   0.02194   0.02199
     Eigenvalues ---    0.02217   0.04043   0.15807   0.15997   0.16000
     Eigenvalues ---    0.16000   0.16000   0.16000   0.16070   0.16967
     Eigenvalues ---    0.17578   0.21723   0.22033   0.22522   0.22930
     Eigenvalues ---    0.23533   0.24524   0.24739   0.24981   0.25000
     Eigenvalues ---    0.25000   0.25105   0.27255   0.32252   0.33068
     Eigenvalues ---    0.34044   0.35474   0.35476   0.35571   0.35613
     Eigenvalues ---    0.35665   0.35686   0.35743   0.37387   0.39285
     Eigenvalues ---    0.42071   0.42264   0.43657   0.44750   0.45158
     Eigenvalues ---    0.46073   0.46643   0.46709   0.47067   0.47308
     Eigenvalues ---    0.48528   0.54972   0.56107   0.94783
 RFO step:  Lambda=-4.45570418D-05 EMin= 8.86197629D-03
 Quartic linear search produced a step of  0.04549.
 Iteration  1 RMS(Cart)=  0.00269500 RMS(Int)=  0.00000463
 Iteration  2 RMS(Cart)=  0.00000532 RMS(Int)=  0.00000213
 Iteration  3 RMS(Cart)=  0.00000000 RMS(Int)=  0.00000213
 Variable       Old X    -DE/DX   Delta X   Delta X   Delta X     New X
                                 (Linear)    (Quad)   (Total)
    R1        2.60672   0.00039  -0.00007   0.00068   0.00060   2.60732
    R2        2.65800  -0.00029   0.00006  -0.00041  -0.00035   2.65765
    R3        2.04907   0.00001   0.00000   0.00001   0.00001   2.04908
    R4        2.67717  -0.00113  -0.00009  -0.00256  -0.00264   2.67452
    R5        2.04428   0.00013   0.00003   0.00041   0.00044   2.04471
    R6        2.68744  -0.00051   0.00005  -0.00108  -0.00103   2.68641
    R7        2.69344   0.00026   0.00037   0.00037   0.00074   2.69418
    R8        2.65025  -0.00040  -0.00001  -0.00088  -0.00090   2.64935
    R9        2.77361   0.00020   0.00011   0.00052   0.00063   2.77425
   R10        2.61307   0.00035  -0.00004   0.00073   0.00069   2.61376
   R11        2.04675  -0.00003   0.00002  -0.00009  -0.00007   2.04668
   R12        2.04851  -0.00001  -0.00002  -0.00004  -0.00005   2.04846
   R13        2.34153  -0.00067   0.00007  -0.00048  -0.00041   2.34112
   R14        2.78263   0.00043  -0.00001   0.00112   0.00112   2.78375
   R15        2.69073  -0.00046   0.00071  -0.00147  -0.00077   2.68997
   R16        2.53985   0.00274   0.00092   0.00543   0.00635   2.54620
   R17        2.69437  -0.00044   0.00021  -0.00069  -0.00048   2.69389
   R18        2.64704  -0.00048  -0.00001  -0.00106  -0.00107   2.64597
   R19        2.68152  -0.00106   0.00014  -0.00212  -0.00198   2.67954
   R20        2.60574   0.00044  -0.00006   0.00090   0.00083   2.60658
   R21        2.04457  -0.00005   0.00003  -0.00014  -0.00011   2.04446
   R22        2.60255   0.00012  -0.00006   0.00005  -0.00001   2.60254
   R23        2.04914   0.00021  -0.00007   0.00058   0.00052   2.04966
   R24        2.65413  -0.00010   0.00004   0.00000   0.00004   2.65417
   R25        3.61783  -0.00004  -0.00019  -0.00044  -0.00064   3.61719
   R26        2.04513   0.00002   0.00000   0.00004   0.00004   2.04518
   R27        1.82181   0.00045  -0.00008   0.00083   0.00075   1.82255
    A1        2.10305  -0.00004   0.00005   0.00015   0.00020   2.10325
    A2        2.08845   0.00005  -0.00003   0.00012   0.00009   2.08854
    A3        2.09168  -0.00001  -0.00003  -0.00026  -0.00029   2.09140
    A4        2.10330  -0.00023  -0.00003  -0.00127  -0.00130   2.10200
    A5        2.10025   0.00023   0.00015   0.00145   0.00160   2.10185
    A6        2.07964   0.00000  -0.00012  -0.00018  -0.00030   2.07934
    A7        2.07384   0.00044  -0.00001   0.00156   0.00155   2.07540
    A8        2.11626  -0.00055   0.00021  -0.00177  -0.00156   2.11470
    A9        2.09309   0.00012  -0.00020   0.00021   0.00001   2.09309
   A10        2.08423   0.00014   0.00006   0.00048   0.00054   2.08477
   A11        2.11484  -0.00017  -0.00009  -0.00073  -0.00082   2.11402
   A12        2.08411   0.00003   0.00003   0.00025   0.00028   2.08439
   A13        2.11085  -0.00035  -0.00008  -0.00153  -0.00160   2.10925
   A14        2.05936   0.00017  -0.00002   0.00058   0.00056   2.05992
   A15        2.11297   0.00019   0.00010   0.00095   0.00104   2.11402
   A16        2.09110   0.00005   0.00000   0.00061   0.00061   2.09171
   A17        2.09526  -0.00011  -0.00004  -0.00090  -0.00095   2.09431
   A18        2.09683   0.00006   0.00004   0.00029   0.00034   2.09717
   A19        2.13042  -0.00019  -0.00017  -0.00093  -0.00111   2.12931
   A20        2.03448   0.00001   0.00043   0.00038   0.00080   2.03528
   A21        2.11829   0.00018  -0.00026   0.00057   0.00029   2.11858
   A22        2.12050   0.00003   0.00026   0.00060   0.00086   2.12136
   A23        2.01653   0.00097  -0.00036   0.00312   0.00275   2.01928
   A24        2.14615  -0.00100   0.00010  -0.00371  -0.00361   2.14254
   A25        2.12312  -0.00010  -0.00012  -0.00045  -0.00057   2.12255
   A26        2.06523   0.00014  -0.00002   0.00061   0.00059   2.06582
   A27        2.09484  -0.00004   0.00014  -0.00016  -0.00002   2.09482
   A28        2.08035   0.00012  -0.00028   0.00000  -0.00028   2.08007
   A29        2.14413  -0.00073   0.00051  -0.00193  -0.00142   2.14271
   A30        2.05871   0.00062  -0.00024   0.00193   0.00169   2.06041
   A31        2.09535  -0.00023  -0.00001  -0.00080  -0.00081   2.09454
   A32        2.06253   0.00008  -0.00003   0.00009   0.00005   2.06259
   A33        2.12530   0.00015   0.00005   0.00071   0.00076   2.12606
   A34        2.12050  -0.00034   0.00009  -0.00162  -0.00154   2.11897
   A35        2.12107  -0.00033  -0.00014  -0.00218  -0.00233   2.11875
   A36        2.04161   0.00067   0.00006   0.00381   0.00386   2.04547
   A37        2.11547  -0.00008  -0.00003  -0.00005  -0.00009   2.11539
   A38        2.09065   0.00007   0.00006   0.00023   0.00030   2.09095
   A39        2.07706   0.00001  -0.00003  -0.00018  -0.00021   2.07685
   A40        2.08149   0.00008   0.00006   0.00070   0.00076   2.08225
   A41        2.09852  -0.00003   0.00001  -0.00025  -0.00024   2.09828
   A42        2.10317  -0.00005  -0.00007  -0.00045  -0.00052   2.10265
   A43        1.96084  -0.00014  -0.00092  -0.00119  -0.00212   1.95872
    D1        0.00001   0.00000   0.00000  -0.00003  -0.00003  -0.00002
    D2       -3.14154   0.00000   0.00000  -0.00022  -0.00021   3.14144
    D3        3.14157   0.00000   0.00000   0.00008   0.00008  -3.14153
    D4        0.00003   0.00000   0.00000  -0.00011  -0.00011  -0.00008
    D5       -0.00002   0.00000   0.00000   0.00010   0.00009   0.00007
    D6       -3.14159   0.00000   0.00000  -0.00001  -0.00001   3.14159
    D7       -3.14159   0.00000   0.00000  -0.00001  -0.00001   3.14159
    D8        0.00003   0.00000   0.00000  -0.00011  -0.00011  -0.00008
    D9        0.00004   0.00000   0.00000  -0.00015  -0.00015  -0.00011
   D10       -3.14147  -0.00001   0.00001  -0.00053  -0.00052   3.14119
   D11        3.14158   0.00000   0.00000   0.00003   0.00003  -3.14157
   D12        0.00007   0.00000   0.00001  -0.00034  -0.00033  -0.00026
   D13       -0.00007   0.00001  -0.00001   0.00026   0.00026   0.00019
   D14        3.14142   0.00001  -0.00001   0.00076   0.00075  -3.14102
   D15        3.14145   0.00001  -0.00001   0.00063   0.00062  -3.14112
   D16       -0.00025   0.00001  -0.00002   0.00113   0.00111   0.00086
   D17        3.14125   0.00001  -0.00002   0.00178   0.00176  -3.14017
   D18       -0.00042   0.00001  -0.00004   0.00120   0.00116   0.00074
   D19       -0.00027   0.00001  -0.00001   0.00141   0.00139   0.00113
   D20        3.14125   0.00000  -0.00004   0.00082   0.00079  -3.14115
   D21        0.00005   0.00000   0.00000  -0.00020  -0.00019  -0.00014
   D22        3.14159   0.00000   0.00000   0.00006   0.00006  -3.14154
   D23       -3.14144  -0.00001   0.00001  -0.00069  -0.00068   3.14107
   D24        0.00010  -0.00001   0.00001  -0.00043  -0.00042  -0.00032
   D25        3.14026   0.00005  -0.00008   0.00594   0.00586  -3.13706
   D26        0.00071  -0.00004   0.00004  -0.00341  -0.00337  -0.00266
   D27       -0.00144   0.00006  -0.00009   0.00644   0.00635   0.00491
   D28       -3.14099  -0.00003   0.00004  -0.00292  -0.00288   3.13932
   D29       -0.00001   0.00000   0.00000   0.00002   0.00002   0.00001
   D30        3.14156   0.00000   0.00000   0.00012   0.00012  -3.14151
   D31       -3.14154   0.00000   0.00000  -0.00025  -0.00025   3.14140
   D32        0.00003   0.00000   0.00000  -0.00015  -0.00015  -0.00012
   D33       -0.00070   0.00004  -0.00004   0.00339   0.00335   0.00265
   D34        3.14103   0.00003  -0.00003   0.00282   0.00278  -3.13938
   D35       -3.14027  -0.00005   0.00008  -0.00589  -0.00582   3.13710
   D36        0.00146  -0.00006   0.00009  -0.00647  -0.00638  -0.00492
   D37        0.00028  -0.00001   0.00001  -0.00143  -0.00142  -0.00114
   D38       -3.14132  -0.00001   0.00001  -0.00166  -0.00164   3.14023
   D39       -3.14123  -0.00001   0.00004  -0.00081  -0.00077   3.14118
   D40        0.00036  -0.00001   0.00004  -0.00103  -0.00099  -0.00063
   D41       -3.14152   0.00000   0.00001   0.00027   0.00029  -3.14123
   D42        0.00000   0.00000  -0.00001  -0.00032  -0.00033  -0.00033
   D43        0.00023  -0.00001   0.00002  -0.00106  -0.00104  -0.00082
   D44       -3.14136  -0.00001   0.00002  -0.00085  -0.00083   3.14099
   D45       -3.14150  -0.00001   0.00001  -0.00047  -0.00047   3.14121
   D46        0.00009  -0.00001   0.00001  -0.00026  -0.00026  -0.00017
   D47        3.14140   0.00001  -0.00001   0.00074   0.00073  -3.14105
   D48       -0.00012   0.00001  -0.00001   0.00048   0.00047   0.00035
   D49       -0.00006   0.00000   0.00000   0.00018   0.00017   0.00012
   D50       -3.14158   0.00000   0.00000  -0.00009  -0.00009   3.14152
   D51        3.14152   0.00000   0.00000   0.00040   0.00039  -3.14127
   D52       -0.00006   0.00000  -0.00001   0.00030   0.00030   0.00023
   D53       -0.00007   0.00000  -0.00001   0.00018   0.00017   0.00010
   D54        3.14153   0.00000  -0.00001   0.00008   0.00007  -3.14158
   D55        0.00000   0.00000   0.00000   0.00000   0.00000   0.00000
   D56       -3.14154   0.00000   0.00000  -0.00014  -0.00014   3.14150
   D57        3.14152   0.00000  -0.00001   0.00028   0.00028  -3.14139
   D58       -0.00002   0.00000   0.00000   0.00013   0.00013   0.00011
   D59        0.00001   0.00000   0.00000   0.00000   0.00000   0.00001
   D60       -3.14158   0.00000   0.00000  -0.00004  -0.00004   3.14156
   D61       -3.14159   0.00000   0.00000   0.00009   0.00009  -3.14150
   D62        0.00001   0.00000   0.00000   0.00005   0.00005   0.00005
   D63        0.00003   0.00000   0.00000  -0.00009  -0.00009  -0.00007
   D64       -3.14157   0.00000   0.00000  -0.00005  -0.00005   3.14157
   D65        3.14157   0.00000   0.00000   0.00005   0.00005  -3.14157
   D66       -0.00003   0.00000   0.00000   0.00010   0.00009   0.00007
         Item               Value     Threshold  Converged?
 Maximum Force            0.002743     0.000450     NO 
 RMS     Force            0.000356     0.000300     NO 
 Maximum Displacement     0.013292     0.001800     NO 
 RMS     Displacement     0.002696     0.001200     NO 
 Predicted change in Energy=-2.284405D-05
 GradGradGradGradGradGradGradGradGradGradGradGradGradGradGradGradGradGrad

                          Input orientation:                          
 ---------------------------------------------------------------------
 Center     Atomic      Atomic             Coordinates (Angstroms)
 Number     Number       Type             X           Y           Z
 ---------------------------------------------------------------------
      1          6           0       -5.064491    0.066439   -0.001252
      2          6           0       -4.039298    0.989829   -0.000305
      3          6           0       -2.689916    0.562943    0.000924
      4          6           0       -2.409991   -0.830811    0.001304
      5          6           0       -3.471198   -1.746984    0.000226
      6          6           0       -4.784054   -1.311683   -0.001032
      7          1           0       -6.093824    0.407375   -0.002245
      8          1           0       -4.256539    2.049812   -0.000622
      9          1           0       -3.231611   -2.803206    0.000596
     10          1           0       -5.595951   -2.029924   -0.001781
     11          6           0       -1.028438   -1.327329    0.003291
     12          8           0       -0.765938   -2.538060   -0.001109
     13          6           0       -1.618540    1.503563    0.001424
     14          6           0        0.037996   -0.311099    0.001350
     15          6           0       -0.258535    1.083264    0.000937
     16          6           0        1.369514   -0.744207    0.000422
     17          6           0        0.826748    1.995816   -0.000214
     18          6           0        2.394996    0.178271   -0.000752
     19          1           0        1.560338   -1.809127    0.000840
     20          6           0        2.132526    1.558055   -0.001041
     21          1           0        0.663373    3.068074   -0.000563
     22          1           0        2.946293    2.271549   -0.001944
     23         35           0        4.213115   -0.420355   -0.001865
     24          8           0       -1.980546    2.801413    0.001547
     25          1           0       -1.218600    3.392691    0.001565
 ---------------------------------------------------------------------
                    Distance matrix (angstroms):
                    1          2          3          4          5
     1  C    0.000000
     2  C    1.379736   0.000000
     3  C    2.425928   1.415297   0.000000
     4  C    2.802041   2.443231   1.421587   0.000000
     5  C    2.413936   2.795154   2.438476   1.401975   0.000000
     6  C    1.406366   2.419013   2.810630   2.422275   1.383141
     7  H    1.084328   2.135494   3.407462   3.886354   3.394030
     8  H    2.141625   1.082016   2.159882   3.421657   3.877168
     9  H    3.405042   3.878077   3.409457   2.136681   1.083054
    10  H    2.162680   3.397364   3.894612   3.404148   2.143510
    11  C    4.269933   3.799278   2.516673   1.468067   2.478547
    12  O    5.026028   4.812576   3.649372   2.370150   2.818551
    13  C    3.733619   2.474670   1.425697   2.464893   3.741443
    14  C    5.116435   4.279806   2.864516   2.502547   3.791597
    15  C    4.912346   3.781918   2.486433   2.879661   4.281531
    16  C    6.484872   5.679976   4.264694   3.780497   4.943486
    17  C    6.199128   4.968945   3.797374   4.297243   5.699201
    18  C    7.460325   6.485273   5.099442   4.909801   6.174045
    19  H    6.885209   6.260198   4.867379   4.089085   5.031919
    20  C    7.349964   6.197927   4.924043   5.132363   6.505768
    21  H    6.466702   5.141421   4.185717   4.964561   6.346610
    22  H    8.308740   7.102203   5.889499   6.189864   7.571842
    23  Br   9.290368   8.372034   6.972713   6.635814   7.797988
    24  O    4.121991   2.742317   2.348181   3.657523   4.786436
    25  H    5.084766   3.705414   3.189396   4.388324   5.611637
                    6          7          8          9         10
     6  C    0.000000
     7  H    2.161172   0.000000
     8  H    3.402635   2.464390   0.000000
     9  H    2.152840   4.301175   4.960067   0.000000
    10  H    1.083996   2.487630   4.293981   2.487584   0.000000
    11  C    3.755650   5.354191   4.671802   2.651828   4.621238
    12  O    4.201101   6.087853   5.764795   2.479889   4.856668
    13  C    4.236283   4.607582   2.693962   4.598941   5.320276
    14  C    4.924768   6.173770   4.900708   4.111074   5.890308
    15  C    5.120166   5.874303   4.113181   4.893244   6.178993
    16  C    6.179678   7.551660   6.281642   5.040816   7.083133
    17  C    6.513113   7.100525   5.083574   6.284973   7.580082
    18  C    7.332034   8.491912   6.909818   6.367725   8.290438
    19  H    6.363863   7.968632   6.980507   4.893973   7.159695
    20  C    7.488289   8.306438   6.407962   6.913362   8.520737
    21  H    6.989759   7.262164   5.024181   7.045767   8.072714
    22  H    8.520435   9.230323   7.206244   7.994976   9.564131
    23  Br   9.041212  10.340123   8.822516   7.816773   9.940246
    24  O    4.977673   4.759253   2.396884   5.742554   6.034317
    25  H    5.902848   5.716637   3.321507   6.514704   6.968929
                   11         12         13         14         15
    11  C    0.000000
    12  O    1.238868   0.000000
    13  C    2.891742   4.130575   0.000000
    14  C    1.473095   2.367630   2.457053   0.000000
    15  C    2.530556   3.656699   1.423469   1.425545   0.000000
    16  C    2.467836   2.788918   3.739109   1.400187   2.447488
    17  C    3.805919   4.805484   2.494343   2.438029   1.417953
    18  C    3.739886   4.167728   4.226686   2.407268   2.803613
    19  H    2.633229   2.437808   4.591207   2.135794   3.416756
    20  C    4.279855   5.017893   3.751463   2.807276   2.437746
    21  H    4.709756   5.785470   2.766736   3.436554   2.188466
    22  H    5.361943   6.075606   4.628986   3.889507   3.418033
    23  Br   5.319447   5.410698   6.140821   4.176550   4.717684
    24  O    4.237101   5.475879   1.347392   3.709750   2.432562
    25  H    4.723849   5.948001   1.930999   3.911150   2.501035
                   16         17         18         19         20
    16  C    0.000000
    17  C    2.793264   0.000000
    18  C    1.379341   2.400599   0.000000
    19  H    1.081881   3.875015   2.155552   0.000000
    20  C    2.425408   1.377205   1.404527   3.415453   0.000000
    21  H    3.877128   1.084633   3.368899   4.958995   2.106791
    22  H    3.403090   2.137406   2.164657   4.309616   1.082261
    23  Br   2.861985   4.159973   1.914135   2.994315   2.871056
    24  O    4.877943   2.920597   5.101593   5.813342   4.296895
    25  H    4.879781   2.476835   4.836381   5.897576   3.820463
                   21         22         23         24         25
    21  H    0.000000
    22  H    2.417887   0.000000
    23  Br   4.976928   2.975094   0.000000
    24  O    2.657333   4.955251   6.981493   0.000000
    25  H    1.909765   4.313154   6.636480   0.964454   0.000000
 Stoichiometry    C14H8BrO2(2)
 Framework group  C1[X(C14H8BrO2)]
 Deg. of freedom    69
 Full point group                 C1      NOp   1
 Largest Abelian subgroup         C1      NOp   1
 Largest concise Abelian subgroup C1      NOp   1
                         Standard orientation:                         
 ---------------------------------------------------------------------
 Center     Atomic      Atomic             Coordinates (Angstroms)
 Number     Number       Type             X           Y           Z
 ---------------------------------------------------------------------
      1          6           0        5.055286    0.004657    0.002078
      2          6           0        4.038950    0.937786    0.001100
      3          6           0        2.685557    0.523793   -0.000495
      4          6           0        2.392348   -0.867227   -0.001209
      5          6           0        3.444765   -1.793483   -0.000091
      6          6           0        4.761714   -1.370727    0.001527
      7          1           0        6.087825    0.335757    0.003354
      8          1           0        4.266294    1.995648    0.001673
      9          1           0        3.195113   -2.847371   -0.000721
     10          1           0        5.566722   -2.096681    0.002303
     11          6           0        1.006121   -1.350541   -0.003583
     12          8           0        0.732082   -2.558713    0.000523
     13          6           0        1.623204    1.474592   -0.001033
     14          6           0       -0.050569   -0.324183   -0.001663
     15          6           0        0.259251    1.067287   -0.000913
     16          6           0       -1.386159   -0.744569   -0.001099
     17          6           0       -0.817277    1.990151    0.000193
     18          6           0       -2.402794    0.187650    0.000043
     19          1           0       -1.587134   -1.807620   -0.001768
     20          6           0       -2.127172    1.564868    0.000660
     21          1           0       -0.643680    3.060801    0.000788
     22          1           0       -2.934095    2.286092    0.001535
     23         35           0       -4.226542   -0.393603    0.000658
     24          8           0        1.997575    2.768929   -0.000823
     25          1           0        1.241304    3.367450   -0.000883
 ---------------------------------------------------------------------
 Rotational constants (GHZ):      0.9790874      0.1770450      0.1499331
 Standard basis: 6-311G(d) (5D, 7F)
 There are   375 symmetry adapted cartesian basis functions of A   symmetry.
 There are   356 symmetry adapted basis functions of A   symmetry.
   356 basis functions,   642 primitive gaussians,   375 cartesian basis functions
    72 alpha electrons       71 beta electrons
       nuclear repulsion energy      1392.2321617863 Hartrees.
 NAtoms=   25 NActive=   25 NUniq=   25 SFac= 1.00D+00 NAtFMM=   60 NAOKFM=F Big=F
 Integral buffers will be    262144 words long.
 Raffenetti 2 integral format.
 Two-electron integral symmetry is turned on.
 Nuclear repulsion after empirical dispersion term =     1392.1687898083 Hartrees.
 ------------------------------------------------------------------------------
 Polarizable Continuum Model (PCM)
 =================================
 Model                : PCM (using non-symmetric T matrix).
 Atomic radii         : UFF (Universal Force Field).
 Polarization charges : Total charges.
 Charge compensation  : None.
 Solution method      : On-the-fly selection.
 Cavity type          : Scaled VdW (van der Waals Surface) (Alpha=1.100).
 Cavity algorithm     : GePol (No added spheres)
                        Default sphere list used, NSphG=   25.
                        Lebedev-Laikov grids with approx.  5.0 points / Ang**2.
                        Smoothing algorithm: Karplus/York (Gamma=1.0000).
                        Polarization charges: spherical gaussians, with
                                              point-specific exponents (IZeta= 3).
                        Self-potential: point-specific (ISelfS= 7).
                        Self-field    : sphere-specific E.n sum rule (ISelfD= 2).
 1st derivatives      : Analytical E(r).r(x)/FMM algorithm (CHGder, D1EAlg=3).
                        Cavity 1st derivative terms included.
 Solvent              : Acetonitrile, Eps=  35.688000 Eps(inf)=   1.806874
 ------------------------------------------------------------------------------
 One-electron integrals computed using PRISM.
 NBasis=   356 RedAO= T EigKep=  8.53D-05  NBF=   356
 NBsUse=   356 1.00D-06 EigRej= -1.00D+00 NBFU=   356
 Initial guess from the checkpoint file:  "C:\Users\Shengfu Liao\Desktop\suppliment\HS2 opt.chk"
 B after Tr=     0.000000    0.000000    0.000000
         Rot=    1.000000    0.000018   -0.000034   -0.000146 Ang=   0.02 deg.
 Initial guess <Sx>= 0.0000 <Sy>= 0.0000 <Sz>= 0.5000 <S**2>= 0.7721 S= 0.5110
 Requested convergence on RMS density matrix=1.00D-08 within 128 cycles.
 Requested convergence on MAX density matrix=1.00D-06.
 Requested convergence on             energy=1.00D-06.
 No special actions if energy rises.
 Inv3:  Mode=1 IEnd=    14454075.
 Iteration    1 A*A^-1 deviation from unit magnitude is 2.66D-15 for   1091.
 Iteration    1 A*A^-1 deviation from orthogonality  is 2.85D-15 for   1091    832.
 Iteration    1 A^-1*A deviation from unit magnitude is 2.89D-15 for   1552.
 Iteration    1 A^-1*A deviation from orthogonality  is 1.31D-12 for   1348    874.
 Error on total polarization charges =  0.01434
 SCF Done:  E(UB3LYP) =  -3263.12396751     A.U. after   12 cycles
            NFock= 12  Conv=0.46D-08     -V/T= 2.0017
 <Sx>= 0.0000 <Sy>= 0.0000 <Sz>= 0.5000 <S**2>= 0.7721 S= 0.5110
 <L.S>= 0.000000000000E+00
 Annihilation of the first spin contaminant:
 S**2 before annihilation     0.7721,   after     0.7504
 D1PCM: PCM CHGder 1st derivatives, ID1Alg=3 FixD1E=F DoIter=F DoCFld=F I1PDM=0.
 Calling FoFJK, ICntrl=      2127 FMM=F ISym2X=0 I1Cent= 0 IOpClX= 1 NMat=1 NMatS=1 NMatT=0.
 ***** Axes restored to original set *****
 -------------------------------------------------------------------
 Center     Atomic                   Forces (Hartrees/Bohr)
 Number     Number              X              Y              Z
 -------------------------------------------------------------------
      1        6          -0.000220049   -0.000389099   -0.000004348
      2        6           0.000377379    0.000273052   -0.000007605
      3        6           0.000008894   -0.000087591    0.000032063
      4        6          -0.000111570    0.000224452    0.000272822
      5        6           0.000331820   -0.000045913    0.000009673
      6        6          -0.000183673    0.000341426   -0.000007623
      7        1          -0.000014787   -0.000046191    0.000002994
      8        1          -0.000021538   -0.000053195    0.000000473
      9        1          -0.000034008    0.000023366   -0.000003021
     10        1          -0.000019222   -0.000015638   -0.000002145
     11        6           0.000172530   -0.000792791   -0.000931277
     12        8          -0.000080263    0.000555857    0.000367571
     13        6          -0.000077439   -0.000225597   -0.000024814
     14        6           0.000087107    0.000345326    0.000274977
     15        6           0.000245932   -0.000210015    0.000031101
     16        6          -0.000336344   -0.000149972    0.000005978
     17        6          -0.000296723    0.000018489   -0.000001820
     18        6           0.000103021    0.000385273   -0.000007309
     19        1           0.000052093    0.000019358   -0.000003008
     20        6           0.000147527   -0.000239472   -0.000003177
     21        1           0.000036775   -0.000058838   -0.000003623
     22        1           0.000026364    0.000004921    0.000000973
     23       35           0.000031303   -0.000004908   -0.000001482
     24        8          -0.000175535    0.000174279   -0.000001574
     25        1          -0.000049595   -0.000046580    0.000004203
 -------------------------------------------------------------------
 Cartesian Forces:  Max     0.000931277 RMS     0.000222499

 GradGradGradGradGradGradGradGradGradGradGradGradGradGradGradGradGradGrad
 Berny optimization.
 Using GEDIIS/GDIIS optimizer.
 FormGI is forming the generalized inverse of G from B-inverse, IUseBI=4.
 Internal  Forces:  Max     0.000561739 RMS     0.000097077
 Search for a local minimum.
 Step number   5 out of a maximum of  146
 All quantities printed in internal units (Hartrees-Bohrs-Radians)
 Mixed Optimization -- En-DIIS/RFO-DIIS
 Swapping is turned off.
 Update second derivatives using D2CorX and points    1    2    3    4    5
 DE= -1.94D-05 DEPred=-2.28D-05 R= 8.47D-01
 TightC=F SS=  1.41D+00  RLast= 1.85D-02 DXNew= 8.4853D-01 5.5540D-02
 Trust test= 8.47D-01 RLast= 1.85D-02 DXMaxT set to 5.05D-01
 ITU=  1  1  1  1  0
     Eigenvalues ---    0.00894   0.01056   0.01333   0.01534   0.01587
     Eigenvalues ---    0.01672   0.01727   0.01802   0.01865   0.02148
     Eigenvalues ---    0.02148   0.02161   0.02165   0.02169   0.02171
     Eigenvalues ---    0.02177   0.02184   0.02191   0.02194   0.02199
     Eigenvalues ---    0.02217   0.04043   0.15486   0.15907   0.16000
     Eigenvalues ---    0.16000   0.16000   0.16014   0.16151   0.16466
     Eigenvalues ---    0.17579   0.21477   0.21906   0.22422   0.22569
     Eigenvalues ---    0.23526   0.24371   0.24725   0.24965   0.25000
     Eigenvalues ---    0.25046   0.25099   0.27939   0.31978   0.32976
     Eigenvalues ---    0.34221   0.35475   0.35484   0.35576   0.35627
     Eigenvalues ---    0.35663   0.35686   0.35750   0.38014   0.39020
     Eigenvalues ---    0.41448   0.42191   0.42974   0.44461   0.45071
     Eigenvalues ---    0.45476   0.46345   0.46675   0.47207   0.47376
     Eigenvalues ---    0.47787   0.52138   0.56024   0.93988
 En-DIIS/RFO-DIIS IScMMF=        0 using points:     5    4
 RFO step:  Lambda=-3.48782481D-06.
 DidBck=F Rises=F RFO-DIIS coefs:    0.89779    0.10221
 Iteration  1 RMS(Cart)=  0.00383768 RMS(Int)=  0.00002149
 Iteration  2 RMS(Cart)=  0.00002274 RMS(Int)=  0.00001404
 Iteration  3 RMS(Cart)=  0.00000000 RMS(Int)=  0.00001404
 Variable       Old X    -DE/DX   Delta X   Delta X   Delta X     New X
                                 (Linear)    (Quad)   (Total)
    R1        2.60732   0.00027  -0.00006   0.00077   0.00071   2.60803
    R2        2.65765  -0.00026   0.00004  -0.00063  -0.00060   2.65705
    R3        2.04908   0.00000   0.00000   0.00001   0.00001   2.04909
    R4        2.67452  -0.00010   0.00027  -0.00153  -0.00126   2.67327
    R5        2.04471  -0.00004  -0.00004   0.00012   0.00007   2.04478
    R6        2.68641  -0.00016   0.00010  -0.00081  -0.00071   2.68570
    R7        2.69418  -0.00025  -0.00008  -0.00022  -0.00030   2.69388
    R8        2.64935  -0.00009   0.00009  -0.00064  -0.00054   2.64881
    R9        2.77425   0.00012  -0.00006   0.00066   0.00060   2.77485
   R10        2.61376   0.00023  -0.00007   0.00075   0.00068   2.61443
   R11        2.04668  -0.00004   0.00001  -0.00012  -0.00011   2.04656
   R12        2.04846   0.00002   0.00001   0.00002   0.00003   2.04848
   R13        2.34112  -0.00056   0.00004  -0.00067  -0.00063   2.34049
   R14        2.78375   0.00008  -0.00011   0.00077   0.00066   2.78441
   R15        2.68997   0.00013   0.00008   0.00004   0.00011   2.69008
   R16        2.54620   0.00018  -0.00065   0.00403   0.00338   2.54958
   R17        2.69389  -0.00020   0.00005  -0.00053  -0.00048   2.69341
   R18        2.64597  -0.00012   0.00011  -0.00076  -0.00065   2.64532
   R19        2.67954  -0.00011   0.00020  -0.00115  -0.00095   2.67859
   R20        2.60658   0.00019  -0.00009   0.00075   0.00066   2.60724
   R21        2.04446   0.00000   0.00001  -0.00005  -0.00004   2.04442
   R22        2.60254   0.00015   0.00000   0.00025   0.00025   2.60279
   R23        2.04966  -0.00007  -0.00005   0.00004  -0.00001   2.04965
   R24        2.65417  -0.00024   0.00000  -0.00039  -0.00039   2.65378
   R25        3.61719   0.00003   0.00006  -0.00024  -0.00018   3.61701
   R26        2.04518   0.00002   0.00000   0.00007   0.00007   2.04524
   R27        1.82255  -0.00006  -0.00008   0.00022   0.00014   1.82270
    A1        2.10325  -0.00008  -0.00002  -0.00011  -0.00013   2.10311
    A2        2.08854   0.00008  -0.00001   0.00036   0.00036   2.08890
    A3        2.09140   0.00000   0.00003  -0.00025  -0.00022   2.09117
    A4        2.10200  -0.00003   0.00013  -0.00078  -0.00065   2.10135
    A5        2.10185  -0.00001  -0.00016   0.00079   0.00063   2.10247
    A6        2.07934   0.00004   0.00003  -0.00001   0.00003   2.07936
    A7        2.07540   0.00012  -0.00016   0.00114   0.00099   2.07639
    A8        2.11470  -0.00015   0.00016  -0.00107  -0.00091   2.11378
    A9        2.09309   0.00003   0.00000  -0.00007  -0.00007   2.09302
   A10        2.08477  -0.00005  -0.00006   0.00010   0.00004   2.08481
   A11        2.11402   0.00004   0.00008  -0.00033  -0.00023   2.11379
   A12        2.08439   0.00000  -0.00003   0.00023   0.00019   2.08459
   A13        2.10925   0.00000   0.00016  -0.00085  -0.00069   2.10856
   A14        2.05992   0.00004  -0.00006   0.00047   0.00041   2.06033
   A15        2.11402  -0.00004  -0.00011   0.00038   0.00028   2.11429
   A16        2.09171   0.00004  -0.00006   0.00051   0.00044   2.09215
   A17        2.09431  -0.00003   0.00010  -0.00068  -0.00059   2.09373
   A18        2.09717  -0.00001  -0.00003   0.00017   0.00014   2.09731
   A19        2.12931   0.00009   0.00011  -0.00027  -0.00026   2.12905
   A20        2.03528  -0.00011  -0.00008   0.00028   0.00014   2.03542
   A21        2.11858   0.00002  -0.00003   0.00014   0.00000   2.11858
   A22        2.12136   0.00002  -0.00009   0.00075   0.00065   2.12201
   A23        2.01928  -0.00021  -0.00028   0.00045   0.00018   2.01946
   A24        2.14254   0.00019   0.00037  -0.00120  -0.00083   2.14171
   A25        2.12255   0.00004   0.00006  -0.00022  -0.00015   2.12240
   A26        2.06582  -0.00008  -0.00006   0.00006  -0.00001   2.06580
   A27        2.09482   0.00004   0.00000   0.00016   0.00016   2.09498
   A28        2.08007  -0.00002   0.00003  -0.00038  -0.00036   2.07971
   A29        2.14271   0.00001   0.00014  -0.00038  -0.00023   2.14248
   A30        2.06041   0.00001  -0.00017   0.00076   0.00059   2.06100
   A31        2.09454  -0.00001   0.00008  -0.00045  -0.00036   2.09418
   A32        2.06259   0.00006  -0.00001   0.00029   0.00028   2.06287
   A33        2.12606  -0.00004  -0.00008   0.00016   0.00008   2.12614
   A34        2.11897   0.00001   0.00016  -0.00072  -0.00057   2.11840
   A35        2.11875   0.00003   0.00024  -0.00109  -0.00086   2.11789
   A36        2.04547  -0.00004  -0.00039   0.00182   0.00142   2.04689
   A37        2.11539  -0.00003   0.00001  -0.00013  -0.00012   2.11527
   A38        2.09095   0.00000  -0.00003   0.00016   0.00013   2.09108
   A39        2.07685   0.00003   0.00002  -0.00003  -0.00001   2.07684
   A40        2.08225  -0.00002  -0.00008   0.00038   0.00030   2.08255
   A41        2.09828   0.00004   0.00002   0.00005   0.00007   2.09835
   A42        2.10265  -0.00002   0.00005  -0.00043  -0.00037   2.10228
   A43        1.95872  -0.00002   0.00022  -0.00193  -0.00171   1.95701
    D1       -0.00002   0.00000   0.00000   0.00008   0.00009   0.00007
    D2        3.14144   0.00001   0.00002   0.00051   0.00053  -3.14122
    D3       -3.14153   0.00000  -0.00001  -0.00017  -0.00018   3.14147
    D4       -0.00008   0.00000   0.00001   0.00026   0.00027   0.00019
    D5        0.00007   0.00000  -0.00001  -0.00023  -0.00024  -0.00017
    D6        3.14159   0.00000   0.00000  -0.00001  -0.00001   3.14159
    D7        3.14159   0.00000   0.00000   0.00002   0.00002  -3.14158
    D8       -0.00008   0.00001   0.00001   0.00025   0.00026   0.00018
    D9       -0.00011   0.00001   0.00002   0.00033   0.00034   0.00023
   D10        3.14119   0.00002   0.00005   0.00131   0.00136  -3.14063
   D11       -3.14157   0.00000   0.00000  -0.00009  -0.00010   3.14152
   D12       -0.00026   0.00001   0.00003   0.00089   0.00092   0.00066
   D13        0.00019  -0.00002  -0.00003  -0.00059  -0.00062  -0.00043
   D14       -3.14102  -0.00004  -0.00008  -0.00188  -0.00196   3.14021
   D15       -3.14112  -0.00003  -0.00006  -0.00156  -0.00162   3.14045
   D16        0.00086  -0.00005  -0.00011  -0.00285  -0.00296  -0.00210
   D17       -3.14017  -0.00005  -0.00018  -0.00470  -0.00488   3.13813
   D18        0.00074  -0.00001  -0.00012  -0.00176  -0.00188  -0.00114
   D19        0.00113  -0.00004  -0.00014  -0.00371  -0.00385  -0.00273
   D20       -3.14115   0.00000  -0.00008  -0.00077  -0.00085   3.14118
   D21       -0.00014   0.00001   0.00002   0.00045   0.00047   0.00033
   D22       -3.14154   0.00000  -0.00001  -0.00019  -0.00019   3.14145
   D23        3.14107   0.00003   0.00007   0.00172   0.00179  -3.14032
   D24       -0.00032   0.00002   0.00004   0.00108   0.00113   0.00080
   D25       -3.13706  -0.00017  -0.00060  -0.01494  -0.01554   3.13058
   D26       -0.00266   0.00013   0.00034   0.00881   0.00916   0.00650
   D27        0.00491  -0.00019  -0.00065  -0.01624  -0.01688  -0.01197
   D28        3.13932   0.00011   0.00029   0.00752   0.00781  -3.13605
   D29        0.00001   0.00000   0.00000  -0.00004  -0.00004  -0.00003
   D30       -3.14151  -0.00001  -0.00001  -0.00027  -0.00028   3.14140
   D31        3.14140   0.00001   0.00003   0.00062   0.00064  -3.14114
   D32       -0.00012   0.00001   0.00001   0.00039   0.00041   0.00029
   D33        0.00265  -0.00013  -0.00034  -0.00881  -0.00916  -0.00651
   D34       -3.13938  -0.00010  -0.00028  -0.00741  -0.00769   3.13612
   D35        3.13710   0.00017   0.00059   0.01479   0.01538  -3.13070
   D36       -0.00492   0.00019   0.00065   0.01619   0.01685   0.01192
   D37       -0.00114   0.00004   0.00015   0.00373   0.00387   0.00273
   D38        3.14023   0.00005   0.00017   0.00462   0.00479  -3.13817
   D39        3.14118   0.00000   0.00008   0.00058   0.00066  -3.14134
   D40       -0.00063   0.00001   0.00010   0.00147   0.00157   0.00094
   D41       -3.14123  -0.00002  -0.00003  -0.00158  -0.00161   3.14035
   D42       -0.00033   0.00002   0.00003   0.00140   0.00143   0.00110
   D43       -0.00082   0.00005   0.00011   0.00278   0.00288   0.00207
   D44        3.14099   0.00004   0.00009   0.00193   0.00201  -3.14018
   D45        3.14121   0.00003   0.00005   0.00135   0.00140  -3.14057
   D46       -0.00017   0.00001   0.00003   0.00050   0.00053   0.00036
   D47       -3.14105  -0.00003  -0.00007  -0.00175  -0.00182   3.14031
   D48        0.00035  -0.00002  -0.00005  -0.00114  -0.00119  -0.00084
   D49        0.00012  -0.00001  -0.00002  -0.00037  -0.00038  -0.00027
   D50        3.14152   0.00000   0.00001   0.00024   0.00025  -3.14142
   D51       -3.14127  -0.00002  -0.00004  -0.00116  -0.00120   3.14071
   D52        0.00023  -0.00001  -0.00003  -0.00083  -0.00086  -0.00063
   D53        0.00010  -0.00001  -0.00002  -0.00028  -0.00030  -0.00020
   D54       -3.14158   0.00000  -0.00001   0.00005   0.00004  -3.14154
   D55        0.00000   0.00000   0.00000   0.00000   0.00000   0.00000
   D56        3.14150   0.00001   0.00001   0.00026   0.00027  -3.14141
   D57       -3.14139  -0.00001  -0.00003  -0.00063  -0.00066   3.14113
   D58        0.00011  -0.00001  -0.00001  -0.00037  -0.00038  -0.00028
   D59        0.00001   0.00000   0.00000  -0.00008  -0.00008  -0.00007
   D60        3.14156   0.00000   0.00000   0.00010   0.00011  -3.14152
   D61       -3.14150  -0.00001  -0.00001  -0.00039  -0.00040   3.14129
   D62        0.00005   0.00000   0.00000  -0.00021  -0.00022  -0.00017
   D63       -0.00007   0.00001   0.00001   0.00023   0.00024   0.00017
   D64        3.14157   0.00000   0.00000   0.00005   0.00005  -3.14156
   D65       -3.14157   0.00000  -0.00001  -0.00003  -0.00004   3.14158
   D66        0.00007   0.00000  -0.00001  -0.00021  -0.00022  -0.00015
         Item               Value     Threshold  Converged?
 Maximum Force            0.000562     0.000450     NO 
 RMS     Force            0.000097     0.000300     YES
 Maximum Displacement     0.021570     0.001800     NO 
 RMS     Displacement     0.003836     0.001200     NO 
 Predicted change in Energy=-1.001816D-05
 GradGradGradGradGradGradGradGradGradGradGradGradGradGradGradGradGradGrad

                          Input orientation:                          
 ---------------------------------------------------------------------
 Center     Atomic      Atomic             Coordinates (Angstroms)
 Number     Number       Type             X           Y           Z
 ---------------------------------------------------------------------
      1          6           0       -5.064109    0.066843    0.002716
      2          6           0       -4.038271    0.990076    0.000438
      3          6           0       -2.689975    0.561975   -0.002502
      4          6           0       -2.410209   -0.831429   -0.003359
      5          6           0       -3.471217   -1.747389   -0.000762
      6          6           0       -4.784101   -1.311043    0.002227
      7          1           0       -6.093432    0.407826    0.005074
      8          1           0       -4.254433    2.050318    0.001165
      9          1           0       -3.232104   -2.803656   -0.001612
     10          1           0       -5.596617   -2.028601    0.004035
     11          6           0       -1.028279   -1.327820   -0.008124
     12          8           0       -0.765904   -2.538197    0.002633
     13          6           0       -1.618591    1.502344   -0.003708
     14          6           0        0.038389   -0.311336   -0.003355
     15          6           0       -0.258312    1.082731   -0.002466
     16          6           0        1.369578   -0.744336   -0.000926
     17          6           0        0.825899    1.995768    0.000457
     18          6           0        2.394980    0.178751    0.002012
     19          1           0        1.560700   -1.809180   -0.001847
     20          6           0        2.131880    1.558203    0.002628
     21          1           0        0.660804    3.067758    0.001308
     22          1           0        2.945593    2.271809    0.004917
     23         35           0        4.213304   -0.418948    0.005025
     24          8           0       -1.980673    2.802031   -0.003261
     25          1           0       -1.217471    3.391813   -0.003010
 ---------------------------------------------------------------------
                    Distance matrix (angstroms):
                    1          2          3          4          5
     1  C    0.000000
     2  C    1.380111   0.000000
     3  C    2.425221   1.414632   0.000000
     4  C    2.801805   2.443047   1.421212   0.000000
     5  C    2.414281   2.795580   2.437930   1.401687   0.000000
     6  C    1.406049   2.418969   2.809552   2.421863   1.383499
     7  H    1.084334   2.136053   3.406955   3.886123   3.394259
     8  H    2.142369   1.082053   2.159330   3.421351   3.877629
     9  H    3.405294   3.878442   3.409014   2.136632   1.082994
    10  H    2.162049   3.397185   3.893546   3.403891   2.143929
    11  C    4.270026   3.799048   2.516464   1.468386   2.478717
    12  O    5.026012   4.812182   3.648717   2.369985   2.818529
    13  C    3.732599   2.473315   1.425538   2.464377   3.740721
    14  C    5.116497   4.279352   2.864724   2.503224   3.792043
    15  C    4.911999   3.781096   2.486799   2.880046   4.281628
    16  C    6.484624   5.679175   4.264554   3.780791   4.943623
    17  C    6.197818   4.967049   3.796991   4.297145   5.698810
    18  C    7.459928   6.484210   5.099377   4.910228   6.174325
    19  H    6.885316   6.259738   4.867300   4.089513   5.032297
    20  C    7.348906   6.196253   4.923696   5.132344   6.505509
    21  H    6.463754   5.137906   4.184099   4.963346   6.345017
    22  H    8.307659   7.100508   5.889245   6.189892   7.571620
    23  Br   9.290123   8.371014   6.972627   6.636350   7.798504
    24  O    4.121755   2.741698   2.349673   3.658761   4.787374
    25  H    5.084494   3.704763   3.190024   4.388439   5.611664
                    6          7          8          9         10
     6  C    0.000000
     7  H    2.160756   0.000000
     8  H    3.402836   2.465707   0.000000
     9  H    2.153277   4.301262   4.960466   0.000000
    10  H    1.084010   2.486565   4.294071   2.488305   0.000000
    11  C    3.755873   5.354289   4.671185   2.652353   4.621791
    12  O    4.201405   6.087824   5.764052   2.480449   4.857518
    13  C    4.235048   4.606761   2.692204   4.598377   5.319053
    14  C    4.925023   6.173856   4.899567   4.111908   5.890871
    15  C    5.119857   5.874025   4.111596   4.893612   6.178829
    16  C    6.179719   7.551426   6.280095   5.041456   7.083589
    17  C    6.512073   7.099206   5.080626   6.285051   7.579201
    18  C    7.332032   8.491503   6.907783   6.368583   8.290841
    19  H    6.364327   7.968745   6.979363   4.894891   7.160683
    20  C    7.487547   8.305368   6.405246   6.913622   8.520261
    21  H    6.987194   7.259130   5.019437   7.044732   8.070205
    22  H    8.519682   9.229214   7.203433   7.995269   9.563623
    23  Br   9.041523  10.339843   8.820423   7.817991   9.941104
    24  O    4.977611   4.758895   2.394803   5.743676   6.034080
    25  H    5.902349   5.716576   3.320055   6.514798   6.968347
                   11         12         13         14         15
    11  C    0.000000
    12  O    1.238535   0.000000
    13  C    2.891076   4.129538   0.000000
    14  C    1.473447   2.367664   2.456628   0.000000
    15  C    2.530541   3.656336   1.423529   1.425291   0.000000
    16  C    2.467838   2.788948   3.738547   1.399842   2.447080
    17  C    3.805823   4.805276   2.493796   2.437810   1.417449
    18  C    3.740129   4.168093   4.226190   2.407018   2.803063
    19  H    2.633356   2.438150   4.590652   2.135642   3.416424
    20  C    4.279703   5.017734   3.750893   2.806763   2.437031
    21  H    4.708949   5.784654   2.765174   3.435942   2.187492
    22  H    5.361824   6.075473   4.628598   3.889028   3.417451
    23  Br   5.319814   5.411445   6.140231   4.176310   4.717038
    24  O    4.238249   5.476654   1.349181   3.710751   2.433623
    25  H    4.723427   5.947181   1.931578   3.910308   2.500370
                   16         17         18         19         20
    16  C    0.000000
    17  C    2.793521   0.000000
    18  C    1.379692   2.400743   0.000000
    19  H    1.081860   3.875250   2.155901   0.000000
    20  C    2.425450   1.377336   1.404318   3.415485   0.000000
    21  H    3.877425   1.084629   3.369529   4.959268   2.107800
    22  H    3.403085   2.137596   2.164272   4.309576   1.082297
    23  Br   2.862288   4.159974   1.914042   2.994846   2.870794
    24  O    4.878618   2.920089   5.101761   5.814172   4.296538
    25  H    4.878582   2.474736   4.834625   5.896488   3.818418
                   21         22         23         24         25
    21  H    0.000000
    22  H    2.419464   0.000000
    23  Br   4.977688   2.974435   0.000000
    24  O    2.654813   4.954724   6.981413   0.000000
    25  H    1.906030   4.311099   6.634402   0.964531   0.000000
 Stoichiometry    C14H8BrO2(2)
 Framework group  C1[X(C14H8BrO2)]
 Deg. of freedom    69
 Full point group                 C1      NOp   1
 Largest Abelian subgroup         C1      NOp   1
 Largest concise Abelian subgroup C1      NOp   1
                         Standard orientation:                         
 ---------------------------------------------------------------------
 Center     Atomic      Atomic             Coordinates (Angstroms)
 Number     Number       Type             X           Y           Z
 ---------------------------------------------------------------------
      1          6           0        5.054955    0.005669   -0.005074
      2          6           0        4.037814    0.938472   -0.002606
      3          6           0        2.685567    0.523024    0.001322
      4          6           0        2.392761   -0.867698    0.002969
      5          6           0        3.445139   -1.793559    0.000157
      6          6           0        4.762051   -1.369533   -0.003802
      7          1           0        6.087426    0.336992   -0.008193
      8          1           0        4.263899    1.996642   -0.003936
      9          1           0        3.196142   -2.847539    0.001623
     10          1           0        5.567809   -2.094673   -0.005768
     11          6           0        1.006244   -1.351118    0.008772
     12          8           0        0.732535   -2.558988   -0.001287
     13          6           0        1.623042    1.473389    0.002738
     14          6           0       -0.050857   -0.324688    0.004177
     15          6           0        0.258891    1.066538    0.002487
     16          6           0       -1.386045   -0.745198    0.002727
     17          6           0       -0.816721    1.989691   -0.000206
     18          6           0       -2.402756    0.187454   -0.000021
     19          1           0       -1.587134   -1.808204    0.004239
     20          6           0       -2.126745    1.564380   -0.001410
     21          1           0       -0.641591    3.060087   -0.001636
     22          1           0       -2.933737    2.285577   -0.003540
     23         35           0       -4.226601   -0.393185   -0.001693
     24          8           0        1.997283    2.769627    0.001495
     25          1           0        1.239641    3.366533    0.001429
 ---------------------------------------------------------------------
 Rotational constants (GHZ):      0.9791664      0.1770501      0.1499389
 Standard basis: 6-311G(d) (5D, 7F)
 There are   375 symmetry adapted cartesian basis functions of A   symmetry.
 There are   356 symmetry adapted basis functions of A   symmetry.
   356 basis functions,   642 primitive gaussians,   375 cartesian basis functions
    72 alpha electrons       71 beta electrons
       nuclear repulsion energy      1392.2571078200 Hartrees.
 NAtoms=   25 NActive=   25 NUniq=   25 SFac= 1.00D+00 NAtFMM=   60 NAOKFM=F Big=F
 Integral buffers will be    262144 words long.
 Raffenetti 2 integral format.
 Two-electron integral symmetry is turned on.
 Nuclear repulsion after empirical dispersion term =     1392.1937325423 Hartrees.
 ------------------------------------------------------------------------------
 Polarizable Continuum Model (PCM)
 =================================
 Model                : PCM (using non-symmetric T matrix).
 Atomic radii         : UFF (Universal Force Field).
 Polarization charges : Total charges.
 Charge compensation  : None.
 Solution method      : On-the-fly selection.
 Cavity type          : Scaled VdW (van der Waals Surface) (Alpha=1.100).
 Cavity algorithm     : GePol (No added spheres)
                        Default sphere list used, NSphG=   25.
                        Lebedev-Laikov grids with approx.  5.0 points / Ang**2.
                        Smoothing algorithm: Karplus/York (Gamma=1.0000).
                        Polarization charges: spherical gaussians, with
                                              point-specific exponents (IZeta= 3).
                        Self-potential: point-specific (ISelfS= 7).
                        Self-field    : sphere-specific E.n sum rule (ISelfD= 2).
 1st derivatives      : Analytical E(r).r(x)/FMM algorithm (CHGder, D1EAlg=3).
                        Cavity 1st derivative terms included.
 Solvent              : Acetonitrile, Eps=  35.688000 Eps(inf)=   1.806874
 ------------------------------------------------------------------------------
 One-electron integrals computed using PRISM.
 NBasis=   356 RedAO= T EigKep=  8.53D-05  NBF=   356
 NBsUse=   356 1.00D-06 EigRej= -1.00D+00 NBFU=   356
 Initial guess from the checkpoint file:  "C:\Users\Shengfu Liao\Desktop\suppliment\HS2 opt.chk"
 B after Tr=     0.000000    0.000000    0.000000
         Rot=    1.000000    0.000000    0.000000   -0.000019 Ang=   0.00 deg.
 Initial guess <Sx>= 0.0000 <Sy>= 0.0000 <Sz>= 0.5000 <S**2>= 0.7721 S= 0.5110
 ExpMin= 1.03D-01 ExpMax= 4.40D+05 ExpMxC= 1.51D+04 IAcc=2 IRadAn=         4 AccDes= 0.00D+00
 Harris functional with IExCor=  402 and IRadAn=       4 diagonalized for initial guess.
 HarFok:  IExCor=  402 AccDes= 0.00D+00 IRadAn=         4 IDoV= 1 UseB2=F ITyADJ=14
 ICtDFT=  3500011 ScaDFX=  1.000000  1.000000  1.000000  1.000000
 FoFCou: FMM=F IPFlag=           0 FMFlag=      100000 FMFlg1=           0
         NFxFlg=           0 DoJE=T BraDBF=F KetDBF=T FulRan=T
         wScrn=  0.000000 ICntrl=     500 IOpCl=  0 I1Cent=   200000004 NGrid=           0
         NMat0=    1 NMatS0=      1 NMatT0=    0 NMatD0=    1 NMtDS0=    0 NMtDT0=    0
 Petite list used in FoFCou.
 Requested convergence on RMS density matrix=1.00D-08 within 128 cycles.
 Requested convergence on MAX density matrix=1.00D-06.
 Requested convergence on             energy=1.00D-06.
 No special actions if energy rises.
 Inv3:  Mode=1 IEnd=    14467248.
 Iteration    1 A*A^-1 deviation from unit magnitude is 3.33D-15 for   1476.
 Iteration    1 A*A^-1 deviation from orthogonality  is 2.84D-15 for   1089    830.
 Iteration    1 A^-1*A deviation from unit magnitude is 2.89D-15 for    507.
 Iteration    1 A^-1*A deviation from orthogonality  is 6.34D-13 for   1401    873.
 Error on total polarization charges =  0.01434
 SCF Done:  E(UB3LYP) =  -3263.12395289     A.U. after   12 cycles
            NFock= 12  Conv=0.40D-08     -V/T= 2.0017
 <Sx>= 0.0000 <Sy>= 0.0000 <Sz>= 0.5000 <S**2>= 0.7722 S= 0.5110
 <L.S>= 0.000000000000E+00
 Annihilation of the first spin contaminant:
 S**2 before annihilation     0.7722,   after     0.7504
 D1PCM: PCM CHGder 1st derivatives, ID1Alg=3 FixD1E=F DoIter=F DoCFld=F I1PDM=0.
 Calling FoFJK, ICntrl=      2127 FMM=F ISym2X=0 I1Cent= 0 IOpClX= 1 NMat=1 NMatS=1 NMatT=0.
 ***** Axes restored to original set *****
 -------------------------------------------------------------------
 Center     Atomic                   Forces (Hartrees/Bohr)
 Number     Number              X              Y              Z
 -------------------------------------------------------------------
      1        6          -0.000083191   -0.000073254    0.000010651
      2        6          -0.000246536    0.000094819    0.000020826
      3        6           0.000370325    0.000331470   -0.000090280
      4        6           0.000173789    0.000004128   -0.000675059
      5        6           0.000025417    0.000070306   -0.000021713
      6        6          -0.000079033    0.000065685    0.000019155
      7        1           0.000001508   -0.000018807   -0.000007209
      8        1          -0.000062306   -0.000110813   -0.000000882
      9        1          -0.000040675   -0.000011059    0.000007155
     10        1           0.000016676   -0.000053590    0.000004776
     11        6           0.000062821   -0.000478619    0.002268315
     12        8           0.000009250    0.000273807   -0.000892590
     13        6          -0.000182773    0.000977529    0.000114892
     14        6          -0.000135520    0.000113717   -0.000680825
     15        6          -0.000219483   -0.000178925   -0.000075007
     16        6          -0.000017434   -0.000024795   -0.000013868
     17        6          -0.000087853    0.000014316    0.000008864
     18        6          -0.000068473    0.000171163    0.000017507
     19        1           0.000064506    0.000005851    0.000006970
     20        6           0.000192413    0.000001105    0.000009553
     21        1           0.000223014   -0.000060299    0.000004035
     22        1          -0.000002423    0.000014002   -0.000002500
     23       35           0.000039897   -0.000023396    0.000002607
     24        8           0.000229413   -0.001070787   -0.000021215
     25        1          -0.000183329   -0.000033555   -0.000014159
 -------------------------------------------------------------------
 Cartesian Forces:  Max     0.002268315 RMS     0.000366428

 GradGradGradGradGradGradGradGradGradGradGradGradGradGradGradGradGradGrad
 Berny optimization.
 Using GEDIIS/GDIIS optimizer.
 FormGI is forming the generalized inverse of G from B-inverse, IUseBI=4.
 Internal  Forces:  Max     0.001078700 RMS     0.000162034
 Search for a local minimum.
 Step number   6 out of a maximum of  146
 All quantities printed in internal units (Hartrees-Bohrs-Radians)
 Mixed Optimization -- En-DIIS/RFO-DIIS
 Swapping is turned off.
 Update second derivatives using D2CorX and points    1    2    3    4    5
                                                      6
 DE=  1.46D-05 DEPred=-1.00D-05 R=-1.46D+00
 Trust test=-1.46D+00 RLast= 3.88D-02 DXMaxT set to 2.52D-01
 ITU= -1  1  1  1  1  0
     Eigenvalues ---    0.00894   0.01178   0.01534   0.01578   0.01672
     Eigenvalues ---    0.01724   0.01801   0.01842   0.02148   0.02148
     Eigenvalues ---    0.02160   0.02165   0.02168   0.02171   0.02177
     Eigenvalues ---    0.02184   0.02191   0.02194   0.02199   0.02217
     Eigenvalues ---    0.03699   0.04047   0.11609   0.15807   0.16000
     Eigenvalues ---    0.16000   0.16000   0.16011   0.16093   0.16307
     Eigenvalues ---    0.17577   0.20117   0.21793   0.22359   0.22564
     Eigenvalues ---    0.23512   0.24286   0.24713   0.24956   0.24999
     Eigenvalues ---    0.25081   0.25136   0.28330   0.31437   0.32890
     Eigenvalues ---    0.34389   0.35393   0.35476   0.35489   0.35631
     Eigenvalues ---    0.35650   0.35673   0.35754   0.37348   0.38160
     Eigenvalues ---    0.39535   0.42077   0.42367   0.44435   0.44907
     Eigenvalues ---    0.45328   0.46249   0.46674   0.47076   0.47264
     Eigenvalues ---    0.47536   0.49431   0.56194   0.93060
 En-DIIS/RFO-DIIS IScMMF=        0 using points:     6    5    4
 RFO step:  Lambda=-1.01517163D-05.
 DidBck=T Rises=F RFO-DIIS coefs:    0.28662    0.65402    0.05935
 Iteration  1 RMS(Cart)=  0.00274987 RMS(Int)=  0.00000866
 Iteration  2 RMS(Cart)=  0.00001166 RMS(Int)=  0.00000245
 Iteration  3 RMS(Cart)=  0.00000000 RMS(Int)=  0.00000245
 Variable       Old X    -DE/DX   Delta X   Delta X   Delta X     New X
                                 (Linear)    (Quad)   (Total)
    R1        2.60803   0.00006  -0.00054   0.00052  -0.00002   2.60801
    R2        2.65705  -0.00009   0.00045  -0.00050  -0.00005   2.65700
    R3        2.04909   0.00000  -0.00001   0.00000  -0.00001   2.04909
    R4        2.67327   0.00039   0.00105  -0.00020   0.00086   2.67412
    R5        2.04478  -0.00009  -0.00008  -0.00011  -0.00019   2.04460
    R6        2.68570   0.00012   0.00057  -0.00032   0.00025   2.68595
    R7        2.69388  -0.00016   0.00017  -0.00043  -0.00026   2.69362
    R8        2.64881   0.00006   0.00044  -0.00021   0.00023   2.64904
    R9        2.77485   0.00000  -0.00047   0.00034  -0.00012   2.77472
   R10        2.61443   0.00003  -0.00052   0.00043  -0.00009   2.61434
   R11        2.04656   0.00000   0.00009  -0.00008   0.00000   2.04657
   R12        2.04848   0.00002  -0.00002   0.00005   0.00004   2.04852
   R13        2.34049  -0.00027   0.00047  -0.00057  -0.00009   2.34040
   R14        2.78441  -0.00003  -0.00054   0.00032  -0.00022   2.78419
   R15        2.69008   0.00014  -0.00004   0.00032   0.00029   2.69037
   R16        2.54958  -0.00108  -0.00279   0.00002  -0.00277   2.54682
   R17        2.69341   0.00002   0.00037  -0.00041  -0.00004   2.69337
   R18        2.64532   0.00008   0.00053  -0.00024   0.00029   2.64561
   R19        2.67859   0.00028   0.00080  -0.00027   0.00052   2.67911
   R20        2.60724   0.00000  -0.00052   0.00038  -0.00014   2.60710
   R21        2.04442   0.00001   0.00004  -0.00001   0.00003   2.04444
   R22        2.60279   0.00009  -0.00018   0.00032   0.00014   2.60293
   R23        2.04965  -0.00010  -0.00002  -0.00016  -0.00018   2.04947
   R24        2.65378  -0.00016   0.00028  -0.00046  -0.00018   2.65360
   R25        3.61701   0.00005   0.00016   0.00016   0.00033   3.61734
   R26        2.04524   0.00000  -0.00005   0.00005   0.00000   2.04524
   R27        1.82270  -0.00016  -0.00015  -0.00009  -0.00024   1.82246
    A1        2.10311  -0.00002   0.00008  -0.00023  -0.00014   2.10297
    A2        2.08890   0.00002  -0.00026   0.00030   0.00004   2.08894
    A3        2.09117   0.00001   0.00018  -0.00007   0.00010   2.09127
    A4        2.10135   0.00006   0.00054  -0.00012   0.00043   2.10177
    A5        2.10247  -0.00011  -0.00054  -0.00009  -0.00063   2.10184
    A6        2.07936   0.00005   0.00000   0.00021   0.00021   2.07957
    A7        2.07639  -0.00012  -0.00080   0.00035  -0.00045   2.07593
    A8        2.11378   0.00013   0.00074  -0.00043   0.00031   2.11409
    A9        2.09302  -0.00001   0.00005   0.00009   0.00014   2.09316
   A10        2.08481  -0.00006  -0.00006  -0.00016  -0.00022   2.08459
   A11        2.11379   0.00010   0.00021   0.00015   0.00036   2.11415
   A12        2.08459  -0.00004  -0.00015   0.00001  -0.00014   2.08445
   A13        2.10856   0.00013   0.00058  -0.00004   0.00055   2.10911
   A14        2.06033  -0.00002  -0.00033   0.00025  -0.00008   2.06025
   A15        2.11429  -0.00012  -0.00026  -0.00021  -0.00047   2.11382
   A16        2.09215   0.00001  -0.00035   0.00019  -0.00016   2.09199
   A17        2.09373   0.00003   0.00047  -0.00014   0.00033   2.09405
   A18        2.09731  -0.00004  -0.00012  -0.00005  -0.00017   2.09714
   A19        2.12905   0.00014   0.00025   0.00029   0.00055   2.12961
   A20        2.03542  -0.00013  -0.00015  -0.00036  -0.00050   2.03492
   A21        2.11858   0.00000  -0.00002   0.00008   0.00008   2.11866
   A22        2.12201  -0.00003  -0.00052   0.00000  -0.00052   2.12149
   A23        2.01946  -0.00036  -0.00029  -0.00046  -0.00075   2.01871
   A24        2.14171   0.00039   0.00081   0.00046   0.00127   2.14298
   A25        2.12240   0.00010   0.00014   0.00016   0.00029   2.12270
   A26        2.06580  -0.00012  -0.00003  -0.00025  -0.00028   2.06553
   A27        2.09498   0.00002  -0.00011   0.00009  -0.00002   2.09496
   A28        2.07971  -0.00002   0.00027  -0.00003   0.00024   2.07995
   A29        2.14248   0.00020   0.00025  -0.00004   0.00021   2.14269
   A30        2.06100  -0.00018  -0.00052   0.00007  -0.00045   2.06054
   A31        2.09418   0.00007   0.00031  -0.00006   0.00025   2.09443
   A32        2.06287   0.00002  -0.00020   0.00032   0.00011   2.06298
   A33        2.12614  -0.00009  -0.00010  -0.00026  -0.00036   2.12578
   A34        2.11840   0.00011   0.00049  -0.00002   0.00048   2.11888
   A35        2.11789   0.00017   0.00075   0.00012   0.00087   2.11876
   A36        2.04689  -0.00028  -0.00124  -0.00010  -0.00135   2.04555
   A37        2.11527   0.00002   0.00009  -0.00004   0.00005   2.11532
   A38        2.09108  -0.00005  -0.00011  -0.00006  -0.00017   2.09090
   A39        2.07684   0.00003   0.00002   0.00010   0.00012   2.07697
   A40        2.08255  -0.00005  -0.00026  -0.00004  -0.00030   2.08225
   A41        2.09835   0.00003  -0.00004   0.00014   0.00010   2.09846
   A42        2.10228   0.00003   0.00030  -0.00010   0.00020   2.10248
   A43        1.95701   0.00015   0.00135  -0.00022   0.00113   1.95814
    D1        0.00007   0.00000  -0.00006  -0.00001  -0.00007   0.00000
    D2       -3.14122  -0.00002  -0.00037  -0.00001  -0.00038   3.14159
    D3        3.14147   0.00001   0.00012   0.00000   0.00012  -3.14159
    D4        0.00019  -0.00001  -0.00018   0.00000  -0.00019   0.00000
    D5       -0.00017   0.00001   0.00017   0.00000   0.00017   0.00000
    D6        3.14159   0.00000   0.00000   0.00000   0.00001   3.14159
    D7       -3.14158   0.00000  -0.00002   0.00000  -0.00002   3.14159
    D8        0.00018  -0.00001  -0.00018   0.00000  -0.00018   0.00000
    D9        0.00023  -0.00002  -0.00024   0.00001  -0.00023   0.00000
   D10       -3.14063  -0.00005  -0.00094  -0.00002  -0.00096   3.14159
   D11        3.14152   0.00000   0.00007   0.00001   0.00008  -3.14159
   D12        0.00066  -0.00003  -0.00064  -0.00002  -0.00066   0.00000
   D13       -0.00043   0.00004   0.00042   0.00000   0.00042   0.00000
   D14        3.14021   0.00009   0.00135   0.00003   0.00139  -3.14159
   D15        3.14045   0.00007   0.00112   0.00003   0.00115  -3.14159
   D16       -0.00210   0.00012   0.00205   0.00006   0.00211   0.00001
   D17        3.13813   0.00012   0.00338   0.00010   0.00348  -3.14157
   D18       -0.00114   0.00001   0.00127  -0.00023   0.00104  -0.00010
   D19       -0.00273   0.00009   0.00267   0.00007   0.00274   0.00001
   D20        3.14118  -0.00002   0.00056  -0.00026   0.00030   3.14149
   D21        0.00033  -0.00003  -0.00032   0.00000  -0.00033   0.00000
   D22        3.14145   0.00001   0.00013   0.00001   0.00014  -3.14159
   D23       -3.14032  -0.00008  -0.00124  -0.00004  -0.00128   3.14159
   D24        0.00080  -0.00004  -0.00078  -0.00003  -0.00081   0.00000
   D25        3.13058   0.00042   0.01074   0.00030   0.01104  -3.14157
   D26        0.00650  -0.00031  -0.00633  -0.00020  -0.00653  -0.00003
   D27       -0.01197   0.00047   0.01167   0.00033   0.01200   0.00003
   D28       -3.13605  -0.00026  -0.00540  -0.00016  -0.00557   3.14157
   D29       -0.00003   0.00001   0.00003   0.00000   0.00003   0.00000
   D30        3.14140   0.00002   0.00019   0.00000   0.00019   3.14159
   D31       -3.14114  -0.00003  -0.00045  -0.00001  -0.00045   3.14159
   D32        0.00029  -0.00002  -0.00028  -0.00001  -0.00029   0.00000
   D33       -0.00651   0.00031   0.00633   0.00021   0.00654   0.00003
   D34        3.13612   0.00026   0.00532   0.00019   0.00551  -3.14156
   D35       -3.13070  -0.00041  -0.01063  -0.00029  -0.01091   3.14157
   D36        0.01192  -0.00047  -0.01164  -0.00031  -0.01195  -0.00002
   D37        0.00273  -0.00009  -0.00268  -0.00006  -0.00274  -0.00001
   D38       -3.13817  -0.00012  -0.00332  -0.00014  -0.00346   3.14155
   D39       -3.14134   0.00003  -0.00042   0.00029  -0.00013  -3.14148
   D40        0.00094   0.00000  -0.00106   0.00021  -0.00085   0.00009
   D41        3.14035   0.00007   0.00113   0.00019   0.00131  -3.14152
   D42        0.00110  -0.00004  -0.00100  -0.00015  -0.00115  -0.00005
   D43        0.00207  -0.00012  -0.00200  -0.00008  -0.00208  -0.00001
   D44       -3.14018  -0.00009  -0.00139  -0.00001  -0.00140  -3.14158
   D45       -3.14057  -0.00006  -0.00097  -0.00006  -0.00103   3.14158
   D46        0.00036  -0.00003  -0.00036   0.00001  -0.00035   0.00001
   D47        3.14031   0.00008   0.00126   0.00002   0.00128   3.14159
   D48       -0.00084   0.00005   0.00082   0.00002   0.00084   0.00000
   D49       -0.00027   0.00003   0.00026   0.00000   0.00026  -0.00001
   D50       -3.14142  -0.00001  -0.00017   0.00000  -0.00017   3.14159
   D51        3.14071   0.00005   0.00083   0.00006   0.00089  -3.14158
   D52       -0.00063   0.00003   0.00060   0.00003   0.00062   0.00000
   D53       -0.00020   0.00002   0.00020  -0.00002   0.00018  -0.00001
   D54       -3.14154   0.00000  -0.00003  -0.00005  -0.00009   3.14156
   D55        0.00000   0.00000   0.00000   0.00000   0.00000   0.00000
   D56       -3.14141  -0.00002  -0.00019   0.00001  -0.00018  -3.14159
   D57        3.14113   0.00003   0.00045   0.00000   0.00045   3.14159
   D58       -0.00028   0.00002   0.00027   0.00001   0.00028   0.00000
   D59       -0.00007   0.00001   0.00006   0.00002   0.00007   0.00001
   D60       -3.14152  -0.00001  -0.00007  -0.00001  -0.00008   3.14159
   D61        3.14129   0.00002   0.00028   0.00004   0.00033  -3.14157
   D62       -0.00017   0.00001   0.00015   0.00002   0.00018   0.00001
   D63        0.00017  -0.00001  -0.00016   0.00000  -0.00017   0.00000
   D64       -3.14156   0.00000  -0.00003   0.00002  -0.00001  -3.14158
   D65        3.14158   0.00000   0.00002  -0.00002   0.00001   3.14159
   D66       -0.00015   0.00001   0.00015   0.00000   0.00016   0.00000
         Item               Value     Threshold  Converged?
 Maximum Force            0.001079     0.000450     NO 
 RMS     Force            0.000162     0.000300     YES
 Maximum Displacement     0.015372     0.001800     NO 
 RMS     Displacement     0.002751     0.001200     NO 
 Predicted change in Energy=-1.820479D-05
 GradGradGradGradGradGradGradGradGradGradGradGradGradGradGradGradGradGrad

                          Input orientation:                          
 ---------------------------------------------------------------------
 Center     Atomic      Atomic             Coordinates (Angstroms)
 Number     Number       Type             X           Y           Z
 ---------------------------------------------------------------------
      1          6           0       -5.064459    0.066729   -0.000086
      2          6           0       -4.038723    0.990059   -0.000030
      3          6           0       -2.689765    0.562533    0.000003
      4          6           0       -2.409866   -0.830978   -0.000026
      5          6           0       -3.471104   -1.746864   -0.000082
      6          6           0       -4.784120   -1.311062   -0.000111
      7          1           0       -6.093831    0.407564   -0.000112
      8          1           0       -4.255643    2.050046   -0.000012
      9          1           0       -3.232061   -2.803149   -0.000100
     10          1           0       -5.596243   -2.029100   -0.000154
     11          6           0       -1.028132   -1.327741    0.000011
     12          8           0       -0.765505   -2.538060   -0.000041
     13          6           0       -1.618687    1.503044    0.000056
     14          6           0        0.038223   -0.311088    0.000037
     15          6           0       -0.258388    1.082974    0.000066
     16          6           0        1.369540   -0.744193    0.000032
     17          6           0        0.826507    1.995634    0.000072
     18          6           0        2.395159    0.178549    0.000049
     19          1           0        1.560738   -1.809037    0.000012
     20          6           0        2.132544    1.557998    0.000067
     21          1           0        0.662912    3.067756    0.000066
     22          1           0        2.946357    2.271489    0.000068
     23         35           0        4.213375   -0.420043    0.000034
     24          8           0       -1.981631    2.800971   -0.000048
     25          1           0       -1.219768    3.392275   -0.000069
 ---------------------------------------------------------------------
                    Distance matrix (angstroms):
                    1          2          3          4          5
     1  C    0.000000
     2  C    1.380099   0.000000
     3  C    2.425901   1.415085   0.000000
     4  C    2.802275   2.443225   1.421343   0.000000
     5  C    2.414104   2.795163   2.437992   1.401811   0.000000
     6  C    1.406022   2.418838   2.810104   2.422305   1.383450
     7  H    1.084332   2.136065   3.407592   3.886590   3.394150
     8  H    2.141898   1.081955   2.159784   3.421577   3.877115
     9  H    3.404979   3.878032   3.409091   2.136694   1.082996
    10  H    2.162242   3.397233   3.894121   3.404188   2.143798
    11  C    4.270420   3.799455   2.516776   1.468320   2.478665
    12  O    5.026523   4.812648   3.649172   2.370243   2.818911
    13  C    3.733142   2.473808   1.425401   2.464472   3.740769
    14  C    5.116651   4.279541   2.864460   2.502684   3.791679
    15  C    4.912339   3.781477   2.486454   2.879596   4.281300
    16  C    6.484901   5.679519   4.264445   3.780402   4.943398
    17  C    6.198722   4.968062   3.797097   4.296958   5.698750
    18  C    7.460457   6.484858   5.099402   4.909930   6.174161
    19  H    6.885618   6.260103   4.867352   4.089290   5.032226
    20  C    7.349880   6.197345   4.923983   5.132319   6.505612
    21  H    6.465983   5.140252   4.185281   4.964079   6.345916
    22  H    8.308679   7.101648   5.889516   6.189865   7.571722
    23  Br   9.290595   8.371708   6.972717   6.635976   7.798184
    24  O    4.120669   2.740625   2.347777   3.657108   4.785534
    25  H    5.083395   3.703666   3.188781   4.387732   5.610638
                    6          7          8          9         10
     6  C    0.000000
     7  H    2.160791   0.000000
     8  H    3.402401   2.465092   0.000000
     9  H    2.152954   4.300977   4.959961   0.000000
    10  H    1.084030   2.486951   4.293790   2.487671   0.000000
    11  C    3.756025   5.354680   4.671860   2.652194   4.621638
    12  O    4.201760   6.088330   5.764701   2.480760   4.857475
    13  C    4.235464   4.607276   2.693092   4.598508   5.319491
    14  C    4.924930   6.174022   4.900228   4.111584   5.890566
    15  C    5.119928   5.874400   4.112576   4.893331   6.178811
    16  C    6.179715   7.551719   6.280960   5.041233   7.083298
    17  C    6.512555   7.100215   5.082441   6.284926   7.579591
    18  C    7.332189   8.492079   6.909101   6.368369   8.290731
    19  H    6.364370   7.969049   6.980172   4.894811   7.160363
    20  C    7.488107   8.306428   6.407109   6.913652   8.520646
    21  H    6.988862   7.261556   5.022740   7.045448   8.071862
    22  H    8.520267   9.230342   7.205404   7.995298   9.564051
    23  Br   9.041506  10.340378   8.821882   7.817525   9.940707
    24  O    4.976220   4.758002   2.394790   5.741928   6.032827
    25  H    5.901354   5.715329   3.319354   6.514030   6.967412
                   11         12         13         14         15
    11  C    0.000000
    12  O    1.238485   0.000000
    13  C    2.891730   4.130187   0.000000
    14  C    1.473328   2.367569   2.456914   0.000000
    15  C    2.530624   3.656372   1.423683   1.425268   0.000000
    16  C    2.467663   2.788616   3.738927   1.399994   2.447180
    17  C    3.805852   4.805090   2.494318   2.437695   1.417725
    18  C    3.740031   4.167705   4.226731   2.407258   2.803444
    19  H    2.633228   2.437803   4.591146   2.135861   3.416569
    20  C    4.279879   5.017608   3.751634   2.807074   2.437663
    21  H    4.709567   5.784941   2.766589   3.436106   2.188184
    22  H    5.361998   6.075334   4.629270   3.889338   3.418034
    23  Br   5.319521   5.410660   6.140945   4.176573   4.717597
    24  O    4.237385   5.475785   1.347718   3.710084   2.433327
    25  H    4.723905   5.947708   1.930888   3.911194   2.501424
                   16         17         18         19         20
    16  C    0.000000
    17  C    2.793123   0.000000
    18  C    1.379618   2.400514   0.000000
    19  H    1.081873   3.874870   2.155633   0.000000
    20  C    2.425337   1.377410   1.404225   3.415243   0.000000
    21  H    3.876890   1.084531   3.368709   4.958750   2.106938
    22  H    3.403041   2.137723   2.164305   4.309366   1.082294
    23  Br   2.862249   4.160092   1.914215   2.994292   2.870976
    24  O    4.878374   2.921337   5.102293   5.813824   4.297839
    25  H    4.880049   2.477468   4.836914   5.897869   3.821331
                   21         22         23         24         25
    21  H    0.000000
    22  H    2.418298   0.000000
    23  Br   4.977000   2.974841   0.000000
    24  O    2.657966   4.956351   6.982337   0.000000
    25  H    1.910444   4.314251   6.637229   0.964404   0.000000
 Stoichiometry    C14H8BrO2(2)
 Framework group  C1[X(C14H8BrO2)]
 Deg. of freedom    69
 Full point group                 C1      NOp   1
 Largest Abelian subgroup         C1      NOp   1
 Largest concise Abelian subgroup C1      NOp   1
                         Standard orientation:                         
 ---------------------------------------------------------------------
 Center     Atomic      Atomic             Coordinates (Angstroms)
 Number     Number       Type             X           Y           Z
 ---------------------------------------------------------------------
      1          6           0        5.055337    0.004867    0.000090
      2          6           0        4.038464    0.937949    0.000034
      3          6           0        2.685485    0.523324    0.000000
      4          6           0        2.392292   -0.867450    0.000030
      5          6           0        3.444736   -1.793429    0.000086
      6          6           0        4.761853   -1.370185    0.000115
      7          1           0        6.087916    0.335857    0.000115
      8          1           0        4.265496    1.995816    0.000015
      9          1           0        3.195617   -2.847383    0.000103
     10          1           0        5.567082   -2.095945    0.000158
     11          6           0        1.005877   -1.350997   -0.000007
     12          8           0        0.731705   -2.558753    0.000045
     13          6           0        1.623437    1.474020   -0.000052
     14          6           0       -0.050721   -0.324207   -0.000033
     15          6           0        0.259188    1.066959   -0.000063
     16          6           0       -1.386113   -0.744579   -0.000028
     17          6           0       -0.816942    1.989937   -0.000069
     18          6           0       -2.402874    0.187914   -0.000045
     19          1           0       -1.587470   -1.807549   -0.000008
     20          6           0       -2.127098    1.564793   -0.000063
     21          1           0       -0.643116    3.060448   -0.000063
     22          1           0       -2.934061    2.286022   -0.000064
     23         35           0       -4.226722   -0.393288   -0.000030
     24          8           0        1.998759    2.768422    0.000052
     25          1           0        1.242577    3.366974    0.000072
 ---------------------------------------------------------------------
 Rotational constants (GHZ):      0.9793006      0.1770357      0.1499314
 Standard basis: 6-311G(d) (5D, 7F)
 There are   375 symmetry adapted cartesian basis functions of A   symmetry.
 There are   356 symmetry adapted basis functions of A   symmetry.
   356 basis functions,   642 primitive gaussians,   375 cartesian basis functions
    72 alpha electrons       71 beta electrons
       nuclear repulsion energy      1392.2513896404 Hartrees.
 NAtoms=   25 NActive=   25 NUniq=   25 SFac= 1.00D+00 NAtFMM=   60 NAOKFM=F Big=F
 Integral buffers will be    262144 words long.
 Raffenetti 2 integral format.
 Two-electron integral symmetry is turned on.
 Nuclear repulsion after empirical dispersion term =     1392.1880163287 Hartrees.
 ------------------------------------------------------------------------------
 Polarizable Continuum Model (PCM)
 =================================
 Model                : PCM (using non-symmetric T matrix).
 Atomic radii         : UFF (Universal Force Field).
 Polarization charges : Total charges.
 Charge compensation  : None.
 Solution method      : On-the-fly selection.
 Cavity type          : Scaled VdW (van der Waals Surface) (Alpha=1.100).
 Cavity algorithm     : GePol (No added spheres)
                        Default sphere list used, NSphG=   25.
                        Lebedev-Laikov grids with approx.  5.0 points / Ang**2.
                        Smoothing algorithm: Karplus/York (Gamma=1.0000).
                        Polarization charges: spherical gaussians, with
                                              point-specific exponents (IZeta= 3).
                        Self-potential: point-specific (ISelfS= 7).
                        Self-field    : sphere-specific E.n sum rule (ISelfD= 2).
 1st derivatives      : Analytical E(r).r(x)/FMM algorithm (CHGder, D1EAlg=3).
                        Cavity 1st derivative terms included.
 Solvent              : Acetonitrile, Eps=  35.688000 Eps(inf)=   1.806874
 ------------------------------------------------------------------------------
 One-electron integrals computed using PRISM.
 NBasis=   356 RedAO= T EigKep=  8.53D-05  NBF=   356
 NBsUse=   356 1.00D-06 EigRej= -1.00D+00 NBFU=   356
 Initial guess from the checkpoint file:  "C:\Users\Shengfu Liao\Desktop\suppliment\HS2 opt.chk"
 B after Tr=     0.000000    0.000000    0.000000
         Rot=    1.000000    0.000007    0.000006    0.000046 Ang=   0.01 deg.
 Initial guess <Sx>= 0.0000 <Sy>= 0.0000 <Sz>= 0.5000 <S**2>= 0.7722 S= 0.5110
 Requested convergence on RMS density matrix=1.00D-08 within 128 cycles.
 Requested convergence on MAX density matrix=1.00D-06.
 Requested convergence on             energy=1.00D-06.
 No special actions if energy rises.
 Inv3:  Mode=1 IEnd=    14454075.
 Iteration    1 A*A^-1 deviation from unit magnitude is 2.89D-15 for   1092.
 Iteration    1 A*A^-1 deviation from orthogonality  is 2.04D-15 for   1379    375.
 Iteration    1 A^-1*A deviation from unit magnitude is 3.55D-15 for   1497.
 Iteration    1 A^-1*A deviation from orthogonality  is 5.76D-13 for   1347    873.
 Error on total polarization charges =  0.01434
 SCF Done:  E(UB3LYP) =  -3263.12397148     A.U. after   10 cycles
            NFock= 10  Conv=0.90D-08     -V/T= 2.0017
 <Sx>= 0.0000 <Sy>= 0.0000 <Sz>= 0.5000 <S**2>= 0.7721 S= 0.5110
 <L.S>= 0.000000000000E+00
 Annihilation of the first spin contaminant:
 S**2 before annihilation     0.7721,   after     0.7504
 D1PCM: PCM CHGder 1st derivatives, ID1Alg=3 FixD1E=F DoIter=F DoCFld=F I1PDM=0.
 Calling FoFJK, ICntrl=      2127 FMM=F ISym2X=0 I1Cent= 0 IOpClX= 1 NMat=1 NMatS=1 NMatT=0.
 ***** Axes restored to original set *****
 -------------------------------------------------------------------
 Center     Atomic                   Forces (Hartrees/Bohr)
 Number     Number              X              Y              Z
 -------------------------------------------------------------------
      1        6          -0.000016724   -0.000078055   -0.000000145
      2        6          -0.000007114    0.000032631   -0.000000344
      3        6           0.000017706    0.000028937    0.000002281
      4        6          -0.000034426   -0.000016606    0.000003733
      5        6           0.000089486    0.000006525    0.000000117
      6        6          -0.000045753    0.000052763   -0.000000254
      7        1           0.000004334   -0.000009295    0.000000113
      8        1          -0.000021237   -0.000031275    0.000000016
      9        1          -0.000014297   -0.000014211   -0.000000093
     10        1           0.000013958   -0.000027716    0.000000045
     11        6           0.000046466   -0.000311115   -0.000007161
     12        8          -0.000037790    0.000196260    0.000002653
     13        6           0.000024198    0.000009965   -0.000009740
     14        6           0.000024437    0.000078816    0.000003821
     15        6          -0.000020383    0.000011245    0.000000064
     16        6          -0.000073014   -0.000036084    0.000000143
     17        6          -0.000086315    0.000006678   -0.000000919
     18        6           0.000010189    0.000107602   -0.000000098
     19        1           0.000026292    0.000012034   -0.000000058
     20        6           0.000061858   -0.000047052   -0.000000336
     21        1           0.000031305    0.000008049    0.000001138
     22        1          -0.000011899    0.000017632    0.000000110
     23       35           0.000004121    0.000001047    0.000000136
     24        8           0.000042187   -0.000026050    0.000004020
     25        1          -0.000027583    0.000027273    0.000000758
 -------------------------------------------------------------------
 Cartesian Forces:  Max     0.000311115 RMS     0.000053070

 GradGradGradGradGradGradGradGradGradGradGradGradGradGradGradGradGradGrad
 Berny optimization.
 Using GEDIIS/GDIIS optimizer.
 FormGI is forming the generalized inverse of G from B-inverse, IUseBI=4.
 Internal  Forces:  Max     0.000200005 RMS     0.000024877
 Search for a local minimum.
 Step number   7 out of a maximum of  146
 All quantities printed in internal units (Hartrees-Bohrs-Radians)
 Mixed Optimization -- En-DIIS/RFO-DIIS
 Swapping is turned off.
 Update second derivatives using D2CorX and points    1    2    3    4    5
                                                      6    7
 DE= -1.86D-05 DEPred=-1.82D-05 R= 1.02D+00
 TightC=F SS=  1.41D+00  RLast= 2.76D-02 DXNew= 4.2426D-01 8.2803D-02
 Trust test= 1.02D+00 RLast= 2.76D-02 DXMaxT set to 2.52D-01
 ITU=  1 -1  1  1  1  1  0
     Eigenvalues ---    0.00894   0.01179   0.01534   0.01579   0.01672
     Eigenvalues ---    0.01725   0.01801   0.01844   0.02148   0.02148
     Eigenvalues ---    0.02160   0.02165   0.02168   0.02171   0.02177
     Eigenvalues ---    0.02184   0.02191   0.02194   0.02199   0.02217
     Eigenvalues ---    0.04032   0.04227   0.15347   0.15890   0.15999
     Eigenvalues ---    0.16000   0.16000   0.16014   0.16182   0.17078
     Eigenvalues ---    0.17566   0.19467   0.21879   0.22259   0.22550
     Eigenvalues ---    0.23527   0.24338   0.24706   0.24898   0.24994
     Eigenvalues ---    0.25013   0.25110   0.28101   0.30559   0.32904
     Eigenvalues ---    0.33490   0.35475   0.35484   0.35588   0.35633
     Eigenvalues ---    0.35665   0.35680   0.35752   0.37901   0.39118
     Eigenvalues ---    0.41611   0.42274   0.42672   0.44300   0.44952
     Eigenvalues ---    0.45338   0.46316   0.46674   0.47085   0.47272
     Eigenvalues ---    0.47942   0.50941   0.56236   0.89234
 En-DIIS/RFO-DIIS IScMMF=        0 using points:     7    6    5    4
 RFO step:  Lambda=-1.30883188D-07.
 DidBck=F Rises=F RFO-DIIS coefs:    1.07524   -0.02507   -0.05780    0.00762
 Iteration  1 RMS(Cart)=  0.00014941 RMS(Int)=  0.00000025
 Iteration  2 RMS(Cart)=  0.00000002 RMS(Int)=  0.00000025
 Variable       Old X    -DE/DX   Delta X   Delta X   Delta X     New X
                                 (Linear)    (Quad)   (Total)
    R1        2.60801   0.00003   0.00003   0.00008   0.00011   2.60812
    R2        2.65700  -0.00005  -0.00003  -0.00011  -0.00014   2.65685
    R3        2.04909   0.00000   0.00000  -0.00001  -0.00001   2.04908
    R4        2.67412   0.00005   0.00002   0.00007   0.00009   2.67422
    R5        2.04460  -0.00002  -0.00001  -0.00005  -0.00006   2.04453
    R6        2.68595   0.00005  -0.00001   0.00012   0.00011   2.68606
    R7        2.69362   0.00004  -0.00004   0.00021   0.00017   2.69379
    R8        2.64904  -0.00003   0.00000  -0.00008  -0.00009   2.64895
    R9        2.77472   0.00001   0.00002   0.00007   0.00008   2.77481
   R10        2.61434   0.00003   0.00002   0.00005   0.00007   2.61442
   R11        2.04657   0.00000   0.00000   0.00001   0.00001   2.04657
   R12        2.04852   0.00000   0.00000   0.00001   0.00002   2.04854
   R13        2.34040  -0.00020  -0.00004  -0.00023  -0.00027   2.34013
   R14        2.78419   0.00005   0.00001   0.00020   0.00021   2.78440
   R15        2.69037  -0.00003   0.00003  -0.00007  -0.00003   2.69034
   R16        2.54682  -0.00001  -0.00009  -0.00003  -0.00011   2.54671
   R17        2.69337   0.00001  -0.00002   0.00000  -0.00002   2.69335
   R18        2.64561  -0.00002   0.00000  -0.00007  -0.00007   2.64554
   R19        2.67911   0.00001   0.00001  -0.00002  -0.00002   2.67910
   R20        2.60710   0.00004   0.00002   0.00009   0.00011   2.60721
   R21        2.04444   0.00000   0.00000   0.00000   0.00000   2.04444
   R22        2.60293   0.00004   0.00002   0.00009   0.00012   2.60304
   R23        2.04947   0.00000  -0.00002   0.00000  -0.00002   2.04945
   R24        2.65360  -0.00006  -0.00003  -0.00013  -0.00016   2.65344
   R25        3.61734   0.00001   0.00002   0.00003   0.00005   3.61739
   R26        2.04524   0.00000   0.00000   0.00000   0.00000   2.04524
   R27        1.82246   0.00000  -0.00002   0.00001   0.00000   1.82246
    A1        2.10297   0.00001  -0.00002   0.00003   0.00001   2.10299
    A2        2.08894  -0.00001   0.00002  -0.00005  -0.00003   2.08891
    A3        2.09127   0.00000   0.00000   0.00002   0.00002   2.09129
    A4        2.10177   0.00000   0.00001   0.00002   0.00003   2.10180
    A5        2.10184  -0.00002  -0.00003  -0.00013  -0.00016   2.10169
    A6        2.07957   0.00002   0.00002   0.00011   0.00013   2.07970
    A7        2.07593  -0.00003   0.00000  -0.00011  -0.00011   2.07582
    A8        2.11409   0.00003  -0.00001   0.00011   0.00010   2.11419
    A9        2.09316   0.00000   0.00001   0.00001   0.00002   2.09317
   A10        2.08459   0.00001  -0.00002   0.00007   0.00005   2.08464
   A11        2.11415   0.00002   0.00002   0.00006   0.00008   2.11423
   A12        2.08445  -0.00003   0.00000  -0.00013  -0.00014   2.08431
   A13        2.10911   0.00001   0.00002   0.00000   0.00002   2.10913
   A14        2.06025   0.00002   0.00001   0.00016   0.00017   2.06042
   A15        2.11382  -0.00003  -0.00003  -0.00016  -0.00019   2.11363
   A16        2.09199   0.00000   0.00001  -0.00001   0.00000   2.09199
   A17        2.09405   0.00002   0.00000   0.00012   0.00012   2.09418
   A18        2.09714  -0.00002  -0.00001  -0.00011  -0.00012   2.09702
   A19        2.12961   0.00002   0.00004   0.00005   0.00009   2.12969
   A20        2.03492  -0.00005  -0.00004  -0.00017  -0.00020   2.03471
   A21        2.11866   0.00003   0.00000   0.00011   0.00012   2.11878
   A22        2.12149  -0.00001  -0.00001  -0.00005  -0.00006   2.12143
   A23        2.01871   0.00001  -0.00007   0.00017   0.00010   2.01881
   A24        2.14298   0.00000   0.00008  -0.00012  -0.00004   2.14295
   A25        2.12270   0.00004   0.00002   0.00013   0.00015   2.12285
   A26        2.06553  -0.00004  -0.00003  -0.00012  -0.00015   2.06538
   A27        2.09496   0.00000   0.00001  -0.00001   0.00000   2.09496
   A28        2.07995   0.00000   0.00000   0.00001   0.00002   2.07997
   A29        2.14269   0.00001   0.00002  -0.00003  -0.00001   2.14268
   A30        2.06054  -0.00001  -0.00002   0.00001   0.00000   2.06054
   A31        2.09443   0.00000   0.00001  -0.00001   0.00000   2.09443
   A32        2.06298   0.00002   0.00002   0.00014   0.00016   2.06314
   A33        2.12578  -0.00002  -0.00003  -0.00013  -0.00016   2.12562
   A34        2.11888   0.00001   0.00002   0.00000   0.00002   2.11890
   A35        2.11876   0.00004   0.00004   0.00019   0.00023   2.11899
   A36        2.04555  -0.00004  -0.00006  -0.00019  -0.00025   2.04530
   A37        2.11532   0.00001   0.00000   0.00003   0.00003   2.11535
   A38        2.09090  -0.00003  -0.00001  -0.00011  -0.00012   2.09079
   A39        2.07697   0.00002   0.00001   0.00008   0.00009   2.07705
   A40        2.08225  -0.00001  -0.00001  -0.00003  -0.00004   2.08221
   A41        2.09846   0.00000   0.00001  -0.00005  -0.00004   2.09842
   A42        2.10248   0.00001   0.00000   0.00008   0.00008   2.10256
   A43        1.95814   0.00006   0.00002   0.00034   0.00036   1.95850
    D1        0.00000   0.00000   0.00000   0.00000   0.00000   0.00000
    D2        3.14159   0.00000   0.00000   0.00000   0.00000   3.14159
    D3       -3.14159   0.00000   0.00000   0.00000   0.00000  -3.14159
    D4        0.00000   0.00000   0.00000   0.00000   0.00000   0.00000
    D5        0.00000   0.00000   0.00000   0.00000   0.00000   0.00000
    D6        3.14159   0.00000   0.00000   0.00000   0.00000   3.14159
    D7        3.14159   0.00000   0.00000   0.00000   0.00000  -3.14159
    D8        0.00000   0.00000   0.00000   0.00000   0.00000   0.00000
    D9        0.00000   0.00000   0.00000  -0.00001  -0.00001  -0.00001
   D10        3.14159   0.00000   0.00000   0.00000   0.00000   3.14159
   D11       -3.14159   0.00000   0.00000  -0.00001  -0.00001   3.14159
   D12        0.00000   0.00000   0.00000   0.00000   0.00000   0.00000
   D13        0.00000   0.00000   0.00000   0.00001   0.00001   0.00001
   D14       -3.14159   0.00000   0.00000   0.00000   0.00000  -3.14159
   D15       -3.14159   0.00000   0.00000   0.00000   0.00000  -3.14159
   D16        0.00001   0.00000   0.00000  -0.00001  -0.00001   0.00000
   D17       -3.14157   0.00000   0.00000  -0.00003  -0.00002   3.14159
   D18       -0.00010   0.00000  -0.00002   0.00022   0.00019   0.00009
   D19        0.00001   0.00000   0.00000  -0.00002  -0.00001   0.00000
   D20        3.14149   0.00000  -0.00003   0.00023   0.00020  -3.14150
   D21        0.00000   0.00000   0.00000  -0.00001  -0.00001   0.00000
   D22       -3.14159   0.00000   0.00000  -0.00001  -0.00001   3.14159
   D23        3.14159   0.00000   0.00000   0.00000   0.00000   3.14159
   D24        0.00000   0.00000   0.00000   0.00000   0.00000   0.00000
   D25       -3.14157   0.00000   0.00001  -0.00001   0.00000  -3.14157
   D26       -0.00003   0.00000  -0.00001   0.00004   0.00003   0.00000
   D27        0.00003   0.00000   0.00001  -0.00002  -0.00001   0.00002
   D28        3.14157   0.00000   0.00000   0.00003   0.00002   3.14159
   D29        0.00000   0.00000   0.00000   0.00000   0.00000   0.00000
   D30        3.14159   0.00000   0.00000   0.00000   0.00000  -3.14159
   D31        3.14159   0.00000   0.00000   0.00000   0.00000   3.14159
   D32        0.00000   0.00000   0.00000   0.00000   0.00000   0.00000
   D33        0.00003   0.00000   0.00001  -0.00004  -0.00003   0.00000
   D34       -3.14156   0.00000   0.00001  -0.00005  -0.00004   3.14159
   D35        3.14157   0.00000  -0.00001   0.00000   0.00000   3.14157
   D36       -0.00002   0.00000  -0.00001   0.00000  -0.00001  -0.00003
   D37       -0.00001   0.00000   0.00000   0.00001   0.00001   0.00000
   D38        3.14155   0.00000  -0.00001   0.00007   0.00006  -3.14157
   D39       -3.14148   0.00000   0.00003  -0.00025  -0.00022   3.14149
   D40        0.00009   0.00000   0.00002  -0.00019  -0.00017  -0.00008
   D41       -3.14152   0.00000   0.00002  -0.00014  -0.00012   3.14154
   D42       -0.00005   0.00000  -0.00001   0.00011   0.00009   0.00004
   D43       -0.00001   0.00000   0.00000   0.00002   0.00001   0.00000
   D44       -3.14158   0.00000   0.00000  -0.00003  -0.00003   3.14158
   D45        3.14158   0.00000   0.00000   0.00003   0.00002  -3.14158
   D46        0.00001   0.00000   0.00000  -0.00003  -0.00002  -0.00001
   D47        3.14159   0.00000   0.00000   0.00002   0.00002  -3.14158
   D48        0.00000   0.00000   0.00000   0.00001   0.00001   0.00001
   D49       -0.00001   0.00000   0.00000   0.00001   0.00001   0.00001
   D50        3.14159   0.00000   0.00000   0.00000   0.00000  -3.14159
   D51       -3.14158   0.00000   0.00000  -0.00003  -0.00002   3.14158
   D52        0.00000   0.00000   0.00000   0.00000   0.00000   0.00000
   D53       -0.00001   0.00000   0.00000   0.00003   0.00002   0.00001
   D54        3.14156   0.00000   0.00000   0.00005   0.00005  -3.14157
   D55        0.00000   0.00000   0.00000   0.00000   0.00000   0.00000
   D56       -3.14159   0.00000   0.00000  -0.00001  -0.00001   3.14159
   D57        3.14159   0.00000   0.00000   0.00001   0.00001  -3.14159
   D58        0.00000   0.00000   0.00000   0.00000   0.00000   0.00000
   D59        0.00001   0.00000   0.00000  -0.00001  -0.00001   0.00000
   D60        3.14159   0.00000   0.00000   0.00001   0.00000  -3.14159
   D61       -3.14157   0.00000   0.00000  -0.00004  -0.00003   3.14158
   D62        0.00001   0.00000   0.00000  -0.00002  -0.00002  -0.00001
   D63        0.00000   0.00000   0.00000  -0.00001  -0.00001   0.00000
   D64       -3.14158   0.00000   0.00000  -0.00002  -0.00002   3.14159
   D65        3.14159   0.00000   0.00000   0.00001   0.00001  -3.14159
   D66        0.00000   0.00000   0.00000   0.00000   0.00000   0.00000
         Item               Value     Threshold  Converged?
 Maximum Force            0.000200     0.000450     YES
 RMS     Force            0.000025     0.000300     YES
 Maximum Displacement     0.000657     0.001800     YES
 RMS     Displacement     0.000149     0.001200     YES
 Predicted change in Energy=-1.134942D-07
 Optimization completed.
    -- Stationary point found.
                           ----------------------------
                           !   Optimized Parameters   !
                           ! (Angstroms and Degrees)  !
 --------------------------                            --------------------------
 ! Name  Definition              Value          Derivative Info.                !
 --------------------------------------------------------------------------------
 ! R1    R(1,2)                  1.3801         -DE/DX =    0.0                 !
 ! R2    R(1,6)                  1.406          -DE/DX =    0.0                 !
 ! R3    R(1,7)                  1.0843         -DE/DX =    0.0                 !
 ! R4    R(2,3)                  1.4151         -DE/DX =    0.0                 !
 ! R5    R(2,8)                  1.082          -DE/DX =    0.0                 !
 ! R6    R(3,4)                  1.4213         -DE/DX =    0.0                 !
 ! R7    R(3,13)                 1.4254         -DE/DX =    0.0                 !
 ! R8    R(4,5)                  1.4018         -DE/DX =    0.0                 !
 ! R9    R(4,11)                 1.4683         -DE/DX =    0.0                 !
 ! R10   R(5,6)                  1.3834         -DE/DX =    0.0                 !
 ! R11   R(5,9)                  1.083          -DE/DX =    0.0                 !
 ! R12   R(6,10)                 1.084          -DE/DX =    0.0                 !
 ! R13   R(11,12)                1.2385         -DE/DX =   -0.0002              !
 ! R14   R(11,14)                1.4733         -DE/DX =    0.0001              !
 ! R15   R(13,15)                1.4237         -DE/DX =    0.0                 !
 ! R16   R(13,24)                1.3477         -DE/DX =    0.0                 !
 ! R17   R(14,15)                1.4253         -DE/DX =    0.0                 !
 ! R18   R(14,16)                1.4            -DE/DX =    0.0                 !
 ! R19   R(15,17)                1.4177         -DE/DX =    0.0                 !
 ! R20   R(16,18)                1.3796         -DE/DX =    0.0                 !
 ! R21   R(16,19)                1.0819         -DE/DX =    0.0                 !
 ! R22   R(17,20)                1.3774         -DE/DX =    0.0                 !
 ! R23   R(17,21)                1.0845         -DE/DX =    0.0                 !
 ! R24   R(18,20)                1.4042         -DE/DX =   -0.0001              !
 ! R25   R(18,23)                1.9142         -DE/DX =    0.0                 !
 ! R26   R(20,22)                1.0823         -DE/DX =    0.0                 !
 ! R27   R(24,25)                0.9644         -DE/DX =    0.0                 !
 ! A1    A(2,1,6)              120.4914         -DE/DX =    0.0                 !
 ! A2    A(2,1,7)              119.6874         -DE/DX =    0.0                 !
 ! A3    A(6,1,7)              119.8212         -DE/DX =    0.0                 !
 ! A4    A(1,2,3)              120.4226         -DE/DX =    0.0                 !
 ! A5    A(1,2,8)              120.4268         -DE/DX =    0.0                 !
 ! A6    A(3,2,8)              119.1506         -DE/DX =    0.0                 !
 ! A7    A(2,3,4)              118.9422         -DE/DX =    0.0                 !
 ! A8    A(2,3,13)             121.1287         -DE/DX =    0.0                 !
 ! A9    A(4,3,13)             119.9291         -DE/DX =    0.0                 !
 ! A10   A(3,4,5)              119.4381         -DE/DX =    0.0                 !
 ! A11   A(3,4,11)             121.1318         -DE/DX =    0.0                 !
 ! A12   A(5,4,11)             119.43           -DE/DX =    0.0                 !
 ! A13   A(4,5,6)              120.8432         -DE/DX =    0.0                 !
 ! A14   A(4,5,9)              118.0438         -DE/DX =    0.0                 !
 ! A15   A(6,5,9)              121.113          -DE/DX =    0.0                 !
 ! A16   A(1,6,5)              119.8625         -DE/DX =    0.0                 !
 ! A17   A(1,6,10)             119.9805         -DE/DX =    0.0                 !
 ! A18   A(5,6,10)             120.157          -DE/DX =    0.0                 !
 ! A19   A(4,11,12)            122.0174         -DE/DX =    0.0                 !
 ! A20   A(4,11,14)            116.5922         -DE/DX =    0.0                 !
 ! A21   A(12,11,14)           121.3904         -DE/DX =    0.0                 !
 ! A22   A(3,13,15)            121.5527         -DE/DX =    0.0                 !
 ! A23   A(3,13,24)            115.6635         -DE/DX =    0.0                 !
 ! A24   A(15,13,24)           122.7838         -DE/DX =    0.0                 !
 ! A25   A(11,14,15)           121.6216         -DE/DX =    0.0                 !
 ! A26   A(11,14,16)           118.3461         -DE/DX =    0.0                 !
 ! A27   A(15,14,16)           120.0323         -DE/DX =    0.0                 !
 ! A28   A(13,15,14)           119.1726         -DE/DX =    0.0                 !
 ! A29   A(13,15,17)           122.767          -DE/DX =    0.0                 !
 ! A30   A(14,15,17)           118.0604         -DE/DX =    0.0                 !
 ! A31   A(14,16,18)           120.0018         -DE/DX =    0.0                 !
 ! A32   A(14,16,19)           118.2            -DE/DX =    0.0                 !
 ! A33   A(18,16,19)           121.7982         -DE/DX =    0.0                 !
 ! A34   A(15,17,20)           121.4027         -DE/DX =    0.0                 !
 ! A35   A(15,17,21)           121.3961         -DE/DX =    0.0                 !
 ! A36   A(20,17,21)           117.2012         -DE/DX =    0.0                 !
 ! A37   A(16,18,20)           121.1986         -DE/DX =    0.0                 !
 ! A38   A(16,18,23)           119.8            -DE/DX =    0.0                 !
 ! A39   A(20,18,23)           119.0014         -DE/DX =    0.0                 !
 ! A40   A(17,20,18)           119.3041         -DE/DX =    0.0                 !
 ! A41   A(17,20,22)           120.2328         -DE/DX =    0.0                 !
 ! A42   A(18,20,22)           120.4631         -DE/DX =    0.0                 !
 ! A43   A(13,24,25)           112.1933         -DE/DX =    0.0001              !
 ! D1    D(6,1,2,3)             -0.0001         -DE/DX =    0.0                 !
 ! D2    D(6,1,2,8)            180.0            -DE/DX =    0.0                 !
 ! D3    D(7,1,2,3)           -180.0            -DE/DX =    0.0                 !
 ! D4    D(7,1,2,8)              0.0            -DE/DX =    0.0                 !
 ! D5    D(2,1,6,5)             -0.0001         -DE/DX =    0.0                 !
 ! D6    D(2,1,6,10)           180.0            -DE/DX =    0.0                 !
 ! D7    D(7,1,6,5)           -180.0002         -DE/DX =    0.0                 !
 ! D8    D(7,1,6,10)            -0.0001         -DE/DX =    0.0                 !
 ! D9    D(1,2,3,4)              0.0002         -DE/DX =    0.0                 !
 ! D10   D(1,2,3,13)           179.9998         -DE/DX =    0.0                 !
 ! D11   D(8,2,3,4)            180.0002         -DE/DX =    0.0                 !
 ! D12   D(8,2,3,13)            -0.0002         -DE/DX =    0.0                 !
 ! D13   D(2,3,4,5)             -0.0002         -DE/DX =    0.0                 !
 ! D14   D(2,3,4,11)          -179.9998         -DE/DX =    0.0                 !
 ! D15   D(13,3,4,5)          -179.9998         -DE/DX =    0.0                 !
 ! D16   D(13,3,4,11)            0.0006         -DE/DX =    0.0                 !
 ! D17   D(2,3,13,15)          180.0011         -DE/DX =    0.0                 !
 ! D18   D(2,3,13,24)           -0.0056         -DE/DX =    0.0                 !
 ! D19   D(4,3,13,15)            0.0007         -DE/DX =    0.0                 !
 ! D20   D(4,3,13,24)         -180.0061         -DE/DX =    0.0                 !
 ! D21   D(3,4,5,6)              0.0001         -DE/DX =    0.0                 !
 ! D22   D(3,4,5,9)            180.0002         -DE/DX =    0.0                 !
 ! D23   D(11,4,5,6)           179.9997         -DE/DX =    0.0                 !
 ! D24   D(11,4,5,9)            -0.0002         -DE/DX =    0.0                 !
 ! D25   D(3,4,11,12)         -179.9985         -DE/DX =    0.0                 !
 ! D26   D(3,4,11,14)           -0.0018         -DE/DX =    0.0                 !
 ! D27   D(5,4,11,12)            0.0019         -DE/DX =    0.0                 !
 ! D28   D(5,4,11,14)          179.9986         -DE/DX =    0.0                 !
 ! D29   D(4,5,6,1)              0.0001         -DE/DX =    0.0                 !
 ! D30   D(4,5,6,10)          -180.0            -DE/DX =    0.0                 !
 ! D31   D(9,5,6,1)            180.0            -DE/DX =    0.0                 !
 ! D32   D(9,5,6,10)            -0.0001         -DE/DX =    0.0                 !
 ! D33   D(4,11,14,15)           0.0018         -DE/DX =    0.0                 !
 ! D34   D(4,11,14,16)         180.0019         -DE/DX =    0.0                 !
 ! D35   D(12,11,14,15)        179.9986         -DE/DX =    0.0                 !
 ! D36   D(12,11,14,16)         -0.0014         -DE/DX =    0.0                 !
 ! D37   D(3,13,15,14)          -0.0007         -DE/DX =    0.0                 !
 ! D38   D(3,13,15,17)        -180.0022         -DE/DX =    0.0                 !
 ! D39   D(24,13,15,14)        180.0066         -DE/DX =    0.0                 !
 ! D40   D(24,13,15,17)          0.005          -DE/DX =    0.0                 !
 ! D41   D(3,13,24,25)         180.004          -DE/DX =    0.0                 !
 ! D42   D(15,13,24,25)         -0.0028         -DE/DX =    0.0                 !
 ! D43   D(11,14,15,13)         -0.0006         -DE/DX =    0.0                 !
 ! D44   D(11,14,15,17)        180.0008         -DE/DX =    0.0                 !
 ! D45   D(16,14,15,13)       -180.0007         -DE/DX =    0.0                 !
 ! D46   D(16,14,15,17)          0.0008         -DE/DX =    0.0                 !
 ! D47   D(11,14,16,18)       -180.0003         -DE/DX =    0.0                 !
 ! D48   D(11,14,16,19)         -0.0002         -DE/DX =    0.0                 !
 ! D49   D(15,14,16,18)         -0.0003         -DE/DX =    0.0                 !
 ! D50   D(15,14,16,19)       -180.0001         -DE/DX =    0.0                 !
 ! D51   D(13,15,17,20)        180.0007         -DE/DX =    0.0                 !
 ! D52   D(13,15,17,21)         -0.0002         -DE/DX =    0.0                 !
 ! D53   D(14,15,17,20)         -0.0008         -DE/DX =    0.0                 !
 ! D54   D(14,15,17,21)       -180.0017         -DE/DX =    0.0                 !
 ! D55   D(14,16,18,20)         -0.0002         -DE/DX =    0.0                 !
 ! D56   D(14,16,18,23)        180.0003         -DE/DX =    0.0                 !
 ! D57   D(19,16,18,20)       -180.0004         -DE/DX =    0.0                 !
 ! D58   D(19,16,18,23)          0.0001         -DE/DX =    0.0                 !
 ! D59   D(15,17,20,18)          0.0003         -DE/DX =    0.0                 !
 ! D60   D(15,17,20,22)       -180.0002         -DE/DX =    0.0                 !
 ! D61   D(21,17,20,18)        180.0012         -DE/DX =    0.0                 !
 ! D62   D(21,17,20,22)          0.0007         -DE/DX =    0.0                 !
 ! D63   D(16,18,20,17)          0.0002         -DE/DX =    0.0                 !
 ! D64   D(16,18,20,22)        180.0007         -DE/DX =    0.0                 !
 ! D65   D(23,18,20,17)       -180.0003         -DE/DX =    0.0                 !
 ! D66   D(23,18,20,22)          0.0002         -DE/DX =    0.0                 !
 --------------------------------------------------------------------------------
 GradGradGradGradGradGradGradGradGradGradGradGradGradGradGradGradGradGrad

                          Input orientation:                          
 ---------------------------------------------------------------------
 Center     Atomic      Atomic             Coordinates (Angstroms)
 Number     Number       Type             X           Y           Z
 ---------------------------------------------------------------------
      1          6           0       -5.064459    0.066729   -0.000086
      2          6           0       -4.038723    0.990059   -0.000030
      3          6           0       -2.689765    0.562533    0.000003
      4          6           0       -2.409866   -0.830978   -0.000026
      5          6           0       -3.471104   -1.746864   -0.000082
      6          6           0       -4.784120   -1.311062   -0.000111
      7          1           0       -6.093831    0.407564   -0.000112
      8          1           0       -4.255643    2.050046   -0.000012
      9          1           0       -3.232061   -2.803149   -0.000100
     10          1           0       -5.596243   -2.029100   -0.000154
     11          6           0       -1.028132   -1.327741    0.000011
     12          8           0       -0.765505   -2.538060   -0.000041
     13          6           0       -1.618687    1.503044    0.000056
     14          6           0        0.038223   -0.311088    0.000037
     15          6           0       -0.258388    1.082974    0.000066
     16          6           0        1.369540   -0.744193    0.000032
     17          6           0        0.826507    1.995634    0.000072
     18          6           0        2.395159    0.178549    0.000049
     19          1           0        1.560738   -1.809037    0.000012
     20          6           0        2.132544    1.557998    0.000067
     21          1           0        0.662912    3.067756    0.000066
     22          1           0        2.946357    2.271489    0.000068
     23         35           0        4.213375   -0.420043    0.000034
     24          8           0       -1.981631    2.800971   -0.000048
     25          1           0       -1.219768    3.392275   -0.000069
 ---------------------------------------------------------------------
                    Distance matrix (angstroms):
                    1          2          3          4          5
     1  C    0.000000
     2  C    1.380099   0.000000
     3  C    2.425901   1.415085   0.000000
     4  C    2.802275   2.443225   1.421343   0.000000
     5  C    2.414104   2.795163   2.437992   1.401811   0.000000
     6  C    1.406022   2.418838   2.810104   2.422305   1.383450
     7  H    1.084332   2.136065   3.407592   3.886590   3.394150
     8  H    2.141898   1.081955   2.159784   3.421577   3.877115
     9  H    3.404979   3.878032   3.409091   2.136694   1.082996
    10  H    2.162242   3.397233   3.894121   3.404188   2.143798
    11  C    4.270420   3.799455   2.516776   1.468320   2.478665
    12  O    5.026523   4.812648   3.649172   2.370243   2.818911
    13  C    3.733142   2.473808   1.425401   2.464472   3.740769
    14  C    5.116651   4.279541   2.864460   2.502684   3.791679
    15  C    4.912339   3.781477   2.486454   2.879596   4.281300
    16  C    6.484901   5.679519   4.264445   3.780402   4.943398
    17  C    6.198722   4.968062   3.797097   4.296958   5.698750
    18  C    7.460457   6.484858   5.099402   4.909930   6.174161
    19  H    6.885618   6.260103   4.867352   4.089290   5.032226
    20  C    7.349880   6.197345   4.923983   5.132319   6.505612
    21  H    6.465983   5.140252   4.185281   4.964079   6.345916
    22  H    8.308679   7.101648   5.889516   6.189865   7.571722
    23  Br   9.290595   8.371708   6.972717   6.635976   7.798184
    24  O    4.120669   2.740625   2.347777   3.657108   4.785534
    25  H    5.083395   3.703666   3.188781   4.387732   5.610638
                    6          7          8          9         10
     6  C    0.000000
     7  H    2.160791   0.000000
     8  H    3.402401   2.465092   0.000000
     9  H    2.152954   4.300977   4.959961   0.000000
    10  H    1.084030   2.486951   4.293790   2.487671   0.000000
    11  C    3.756025   5.354680   4.671860   2.652194   4.621638
    12  O    4.201760   6.088330   5.764701   2.480760   4.857475
    13  C    4.235464   4.607276   2.693092   4.598508   5.319491
    14  C    4.924930   6.174022   4.900228   4.111584   5.890566
    15  C    5.119928   5.874400   4.112576   4.893331   6.178811
    16  C    6.179715   7.551719   6.280960   5.041233   7.083298
    17  C    6.512555   7.100215   5.082441   6.284926   7.579591
    18  C    7.332189   8.492079   6.909101   6.368369   8.290731
    19  H    6.364370   7.969049   6.980172   4.894811   7.160363
    20  C    7.488107   8.306428   6.407109   6.913652   8.520646
    21  H    6.988862   7.261556   5.022740   7.045448   8.071862
    22  H    8.520267   9.230342   7.205404   7.995298   9.564051
    23  Br   9.041506  10.340378   8.821882   7.817525   9.940707
    24  O    4.976220   4.758002   2.394790   5.741928   6.032827
    25  H    5.901354   5.715329   3.319354   6.514030   6.967412
                   11         12         13         14         15
    11  C    0.000000
    12  O    1.238485   0.000000
    13  C    2.891730   4.130187   0.000000
    14  C    1.473328   2.367569   2.456914   0.000000
    15  C    2.530624   3.656372   1.423683   1.425268   0.000000
    16  C    2.467663   2.788616   3.738927   1.399994   2.447180
    17  C    3.805852   4.805090   2.494318   2.437695   1.417725
    18  C    3.740031   4.167705   4.226731   2.407258   2.803444
    19  H    2.633228   2.437803   4.591146   2.135861   3.416569
    20  C    4.279879   5.017608   3.751634   2.807074   2.437663
    21  H    4.709567   5.784941   2.766589   3.436106   2.188184
    22  H    5.361998   6.075334   4.629270   3.889338   3.418034
    23  Br   5.319521   5.410660   6.140945   4.176573   4.717597
    24  O    4.237385   5.475785   1.347718   3.710084   2.433327
    25  H    4.723905   5.947708   1.930888   3.911194   2.501424
                   16         17         18         19         20
    16  C    0.000000
    17  C    2.793123   0.000000
    18  C    1.379618   2.400514   0.000000
    19  H    1.081873   3.874870   2.155633   0.000000
    20  C    2.425337   1.377410   1.404225   3.415243   0.000000
    21  H    3.876890   1.084531   3.368709   4.958750   2.106938
    22  H    3.403041   2.137723   2.164305   4.309366   1.082294
    23  Br   2.862249   4.160092   1.914215   2.994292   2.870976
    24  O    4.878374   2.921337   5.102293   5.813824   4.297839
    25  H    4.880049   2.477468   4.836914   5.897869   3.821331
                   21         22         23         24         25
    21  H    0.000000
    22  H    2.418298   0.000000
    23  Br   4.977000   2.974841   0.000000
    24  O    2.657966   4.956351   6.982337   0.000000
    25  H    1.910444   4.314251   6.637229   0.964404   0.000000
 Stoichiometry    C14H8BrO2(2)
 Framework group  C1[X(C14H8BrO2)]
 Deg. of freedom    69
 Full point group                 C1      NOp   1
 Largest Abelian subgroup         C1      NOp   1
 Largest concise Abelian subgroup C1      NOp   1
                         Standard orientation:                         
 ---------------------------------------------------------------------
 Center     Atomic      Atomic             Coordinates (Angstroms)
 Number     Number       Type             X           Y           Z
 ---------------------------------------------------------------------
      1          6           0        5.055337    0.004867    0.000090
      2          6           0        4.038464    0.937949    0.000034
      3          6           0        2.685485    0.523324    0.000000
      4          6           0        2.392292   -0.867450    0.000030
      5          6           0        3.444736   -1.793429    0.000086
      6          6           0        4.761853   -1.370185    0.000115
      7          1           0        6.087916    0.335857    0.000115
      8          1           0        4.265496    1.995816    0.000015
      9          1           0        3.195617   -2.847383    0.000103
     10          1           0        5.567082   -2.095945    0.000158
     11          6           0        1.005877   -1.350997   -0.000007
     12          8           0        0.731705   -2.558753    0.000045
     13          6           0        1.623437    1.474020   -0.000052
     14          6           0       -0.050721   -0.324207   -0.000033
     15          6           0        0.259188    1.066959   -0.000063
     16          6           0       -1.386113   -0.744579   -0.000028
     17          6           0       -0.816942    1.989937   -0.000069
     18          6           0       -2.402874    0.187914   -0.000045
     19          1           0       -1.587470   -1.807549   -0.000008
     20          6           0       -2.127098    1.564793   -0.000063
     21          1           0       -0.643116    3.060448   -0.000063
     22          1           0       -2.934061    2.286022   -0.000064
     23         35           0       -4.226722   -0.393288   -0.000030
     24          8           0        1.998759    2.768422    0.000052
     25          1           0        1.242577    3.366974    0.000072
 ---------------------------------------------------------------------
 Rotational constants (GHZ):      0.9793006      0.1770357      0.1499314

 **********************************************************************

            Population analysis using the SCF density.

 **********************************************************************

 Orbital symmetries:
 Alpha Orbitals:
       Occupied  (A) (A) (A) (A) (A) (A) (A) (A) (A) (A) (A) (A)
                 (A) (A) (A) (A) (A) (A) (A) (A) (A) (A) (A) (A)
                 (A) (A) (A) (A) (A) (A) (A) (A) (A) (A) (A) (A)
                 (A) (A) (A) (A) (A) (A) (A) (A) (A) (A) (A) (A)
                 (A) (A) (A) (A) (A) (A) (A) (A) (A) (A) (A) (A)
                 (A) (A) (A) (A) (A) (A) (A) (A) (A) (A) (A) (A)
       Virtual   (A) (A) (A) (A) (A) (A) (A) (A) (A) (A) (A) (A)
                 (A) (A) (A) (A) (A) (A) (A) (A) (A) (A) (A) (A)
                 (A) (A) (A) (A) (A) (A) (A) (A) (A) (A) (A) (A)
                 (A) (A) (A) (A) (A) (A) (A) (A) (A) (A) (A) (A)
                 (A) (A) (A) (A) (A) (A) (A) (A) (A) (A) (A) (A)
                 (A) (A) (A) (A) (A) (A) (A) (A) (A) (A) (A) (A)
                 (A) (A) (A) (A) (A) (A) (A) (A) (A) (A) (A) (A)
                 (A) (A) (A) (A) (A) (A) (A) (A) (A) (A) (A) (A)
                 (A) (A) (A) (A) (A) (A) (A) (A) (A) (A) (A) (A)
                 (A) (A) (A) (A) (A) (A) (A) (A) (A) (A) (A) (A)
                 (A) (A) (A) (A) (A) (A) (A) (A) (A) (A) (A) (A)
                 (A) (A) (A) (A) (A) (A) (A) (A) (A) (A) (A) (A)
                 (A) (A) (A) (A) (A) (A) (A) (A) (A) (A) (A) (A)
                 (A) (A) (A) (A) (A) (A) (A) (A) (A) (A) (A) (A)
                 (A) (A) (A) (A) (A) (A) (A) (A) (A) (A) (A) (A)
                 (A) (A) (A) (A) (A) (A) (A) (A) (A) (A) (A) (A)
                 (A) (A) (A) (A) (A) (A) (A) (A) (A) (A) (A) (A)
                 (A) (A) (A) (A) (A) (A) (A) (A) (A) (A) (A) (A)
                 (A) (A) (A) (A) (A) (A) (A) (A) (A) (A) (A) (A)
                 (A) (A) (A) (A) (A) (A) (A) (A) (A) (A) (A) (A)
                 (A) (A) (A) (A) (A) (A) (A) (A) (A) (A) (A) (A)
                 (A) (A) (A) (A) (A) (A) (A) (A) (A) (A) (A) (A)
                 (A) (A) (A) (A) (A) (A) (A) (A) (A) (A) (A) (A)
                 (A) (A) (A) (A) (A) (A) (A) (A)
 Beta  Orbitals:
       Occupied  (A) (A) (A) (A) (A) (A) (A) (A) (A) (A) (A) (A)
                 (A) (A) (A) (A) (A) (A) (A) (A) (A) (A) (A) (A)
                 (A) (A) (A) (A) (A) (A) (A) (A) (A) (A) (A) (A)
                 (A) (A) (A) (A) (A) (A) (A) (A) (A) (A) (A) (A)
                 (A) (A) (A) (A) (A) (A) (A) (A) (A) (A) (A) (A)
                 (A) (A) (A) (A) (A) (A) (A) (A) (A) (A) (A)
       Virtual   (A) (A) (A) (A) (A) (A) (A) (A) (A) (A) (A) (A)
                 (A) (A) (A) (A) (A) (A) (A) (A) (A) (A) (A) (A)
                 (A) (A) (A) (A) (A) (A) (A) (A) (A) (A) (A) (A)
                 (A) (A) (A) (A) (A) (A) (A) (A) (A) (A) (A) (A)
                 (A) (A) (A) (A) (A) (A) (A) (A) (A) (A) (A) (A)
                 (A) (A) (A) (A) (A) (A) (A) (A) (A) (A) (A) (A)
                 (A) (A) (A) (A) (A) (A) (A) (A) (A) (A) (A) (A)
                 (A) (A) (A) (A) (A) (A) (A) (A) (A) (A) (A) (A)
                 (A) (A) (A) (A) (A) (A) (A) (A) (A) (A) (A) (A)
                 (A) (A) (A) (A) (A) (A) (A) (A) (A) (A) (A) (A)
                 (A) (A) (A) (A) (A) (A) (A) (A) (A) (A) (A) (A)
                 (A) (A) (A) (A) (A) (A) (A) (A) (A) (A) (A) (A)
                 (A) (A) (A) (A) (A) (A) (A) (A) (A) (A) (A) (A)
                 (A) (A) (A) (A) (A) (A) (A) (A) (A) (A) (A) (A)
                 (A) (A) (A) (A) (A) (A) (A) (A) (A) (A) (A) (A)
                 (A) (A) (A) (A) (A) (A) (A) (A) (A) (A) (A) (A)
                 (A) (A) (A) (A) (A) (A) (A) (A) (A) (A) (A) (A)
                 (A) (A) (A) (A) (A) (A) (A) (A) (A) (A) (A) (A)
                 (A) (A) (A) (A) (A) (A) (A) (A) (A) (A) (A) (A)
                 (A) (A) (A) (A) (A) (A) (A) (A) (A) (A) (A) (A)
                 (A) (A) (A) (A) (A) (A) (A) (A) (A) (A) (A) (A)
                 (A) (A) (A) (A) (A) (A) (A) (A) (A) (A) (A) (A)
                 (A) (A) (A) (A) (A) (A) (A) (A) (A) (A) (A) (A)
                 (A) (A) (A) (A) (A) (A) (A) (A) (A)
 The electronic state is 2-A.
 Alpha  occ. eigenvalues -- -482.84080 -62.49376 -56.31405 -56.31032 -56.31009
 Alpha  occ. eigenvalues --  -19.18455 -19.10509 -10.27221 -10.25871 -10.24785
 Alpha  occ. eigenvalues --  -10.21408 -10.20750 -10.20583 -10.20476 -10.20436
 Alpha  occ. eigenvalues --  -10.20069 -10.19701 -10.19061 -10.18944 -10.18888
 Alpha  occ. eigenvalues --  -10.18780  -8.70346  -6.53475  -6.52221  -6.52165
 Alpha  occ. eigenvalues --   -2.64574  -2.64220  -2.64180  -2.63181  -2.63180
 Alpha  occ. eigenvalues --   -1.10476  -1.03991  -0.90388  -0.88298  -0.83957
 Alpha  occ. eigenvalues --   -0.80319  -0.78775  -0.77478  -0.75493  -0.71171
 Alpha  occ. eigenvalues --   -0.67000  -0.64482  -0.61943  -0.61766  -0.57451
 Alpha  occ. eigenvalues --   -0.56117  -0.54100  -0.49555  -0.48736  -0.47995
 Alpha  occ. eigenvalues --   -0.47328  -0.46437  -0.46414  -0.44822  -0.44253
 Alpha  occ. eigenvalues --   -0.43404  -0.42477  -0.40506  -0.40170  -0.39814
 Alpha  occ. eigenvalues --   -0.37890  -0.37405  -0.36528  -0.36033  -0.33775
 Alpha  occ. eigenvalues --   -0.30479  -0.29810  -0.28638  -0.27712  -0.26830
 Alpha  occ. eigenvalues --   -0.26505  -0.18822
 Alpha virt. eigenvalues --   -0.07823  -0.04272  -0.02344  -0.01808   0.02606
 Alpha virt. eigenvalues --    0.02951   0.04253   0.05679   0.07845   0.08701
 Alpha virt. eigenvalues --    0.09596   0.11739   0.12483   0.12978   0.15453
 Alpha virt. eigenvalues --    0.18111   0.19315   0.20611   0.21518   0.22106
 Alpha virt. eigenvalues --    0.24301   0.24745   0.25719   0.26896   0.27769
 Alpha virt. eigenvalues --    0.28192   0.28199   0.28631   0.29539   0.30035
 Alpha virt. eigenvalues --    0.31253   0.34609   0.34885   0.35360   0.36480
 Alpha virt. eigenvalues --    0.37131   0.37761   0.37778   0.39200   0.39466
 Alpha virt. eigenvalues --    0.40370   0.40635   0.40831   0.41431   0.42317
 Alpha virt. eigenvalues --    0.43119   0.43503   0.43737   0.44550   0.44886
 Alpha virt. eigenvalues --    0.45513   0.45923   0.46962   0.47904   0.48242
 Alpha virt. eigenvalues --    0.51529   0.52466   0.53916   0.53959   0.55690
 Alpha virt. eigenvalues --    0.56398   0.56589   0.58336   0.58864   0.59547
 Alpha virt. eigenvalues --    0.60123   0.60808   0.61368   0.61777   0.62685
 Alpha virt. eigenvalues --    0.62991   0.64331   0.65939   0.65957   0.66929
 Alpha virt. eigenvalues --    0.70478   0.70952   0.72167   0.72360   0.72959
 Alpha virt. eigenvalues --    0.73762   0.75539   0.76003   0.78556   0.79122
 Alpha virt. eigenvalues --    0.80469   0.81248   0.82323   0.83425   0.83435
 Alpha virt. eigenvalues --    0.84591   0.86602   0.88157   0.89820   0.91647
 Alpha virt. eigenvalues --    0.91831   0.92940   0.95990   0.96964   0.97489
 Alpha virt. eigenvalues --    0.98161   0.98729   0.99991   1.00986   1.03620
 Alpha virt. eigenvalues --    1.04588   1.09726   1.09740   1.09787   1.10996
 Alpha virt. eigenvalues --    1.11243   1.12609   1.14182   1.15134   1.16371
 Alpha virt. eigenvalues --    1.18464   1.19367   1.20442   1.20490   1.23571
 Alpha virt. eigenvalues --    1.24918   1.26224   1.27819   1.28299   1.29610
 Alpha virt. eigenvalues --    1.32922   1.39303   1.41845   1.44185   1.45902
 Alpha virt. eigenvalues --    1.46117   1.47737   1.47850   1.49411   1.52462
 Alpha virt. eigenvalues --    1.53754   1.55751   1.57334   1.57584   1.60900
 Alpha virt. eigenvalues --    1.65774   1.66780   1.68437   1.70137   1.72073
 Alpha virt. eigenvalues --    1.74586   1.77507   1.78027   1.78700   1.81367
 Alpha virt. eigenvalues --    1.82418   1.83699   1.84131   1.84294   1.84870
 Alpha virt. eigenvalues --    1.87465   1.87806   1.88549   1.89030   1.90971
 Alpha virt. eigenvalues --    1.91494   1.91853   1.92818   1.94768   1.96002
 Alpha virt. eigenvalues --    1.97753   2.01484   2.05019   2.08291   2.11277
 Alpha virt. eigenvalues --    2.14585   2.18809   2.19019   2.19994   2.25071
 Alpha virt. eigenvalues --    2.26209   2.28829   2.31057   2.32006   2.32291
 Alpha virt. eigenvalues --    2.34096   2.35560   2.35767   2.37413   2.40780
 Alpha virt. eigenvalues --    2.46959   2.47187   2.51799   2.52667   2.54032
 Alpha virt. eigenvalues --    2.56591   2.57435   2.58086   2.65156   2.65492
 Alpha virt. eigenvalues --    2.68755   2.72829   2.73576   2.76039   2.76737
 Alpha virt. eigenvalues --    2.79929   2.81403   2.82015   2.82626   2.87990
 Alpha virt. eigenvalues --    2.88792   2.92980   2.96702   2.97809   3.03319
 Alpha virt. eigenvalues --    3.03370   3.05080   3.07940   3.08605   3.13204
 Alpha virt. eigenvalues --    3.14445   3.17287   3.19164   3.21158   3.23738
 Alpha virt. eigenvalues --    3.26052   3.26994   3.27750   3.28852   3.30805
 Alpha virt. eigenvalues --    3.31309   3.32711   3.35395   3.38695   3.40679
 Alpha virt. eigenvalues --    3.43441   3.45192   3.50285   3.52005   3.53921
 Alpha virt. eigenvalues --    3.56861   3.67298   3.68556   3.74496   3.81981
 Alpha virt. eigenvalues --    3.91666   3.95287   4.10996   4.12593   4.12835
 Alpha virt. eigenvalues --    4.16000   4.20332   4.36228   4.38224   4.53824
 Alpha virt. eigenvalues --    4.75273   4.77663   4.78417   4.80103   4.88890
 Alpha virt. eigenvalues --    5.09095   5.12097   5.53819   5.68820   6.47310
 Alpha virt. eigenvalues --    7.45329   7.52729   7.62488  23.17070  23.36455
 Alpha virt. eigenvalues --   23.72732  23.75881  23.77503  23.86423  23.87718
 Alpha virt. eigenvalues --   23.90363  23.97441  24.00602  24.03834  24.04341
 Alpha virt. eigenvalues --   24.11059  24.12737  47.76403  49.87123  49.98249
 Alpha virt. eigenvalues --  289.65256 289.72561 289.845451020.51258
  Beta  occ. eigenvalues -- -482.84076 -62.49373 -56.31406 -56.31022 -56.31007
  Beta  occ. eigenvalues --  -19.18136 -19.10014 -10.26607 -10.25874 -10.24584
  Beta  occ. eigenvalues --  -10.21512 -10.20601 -10.20585 -10.20506 -10.20389
  Beta  occ. eigenvalues --  -10.20148 -10.19545 -10.19016 -10.18898 -10.18856
  Beta  occ. eigenvalues --  -10.18725  -8.70341  -6.53478  -6.52202  -6.52162
  Beta  occ. eigenvalues --   -2.64573  -2.64210  -2.64182  -2.63170  -2.63169
  Beta  occ. eigenvalues --   -1.09780  -1.03163  -0.90111  -0.88099  -0.83643
  Beta  occ. eigenvalues --   -0.80050  -0.78404  -0.77291  -0.75368  -0.70466
  Beta  occ. eigenvalues --   -0.66848  -0.64168  -0.61829  -0.61550  -0.57234
  Beta  occ. eigenvalues --   -0.55908  -0.53898  -0.49459  -0.48613  -0.47760
  Beta  occ. eigenvalues --   -0.47149  -0.46276  -0.44751  -0.44736  -0.44143
  Beta  occ. eigenvalues --   -0.43118  -0.40703  -0.40268  -0.39700  -0.39560
  Beta  occ. eigenvalues --   -0.37829  -0.36441  -0.36363  -0.35933  -0.32955
  Beta  occ. eigenvalues --   -0.30460  -0.28677  -0.27903  -0.26786  -0.26354
  Beta  occ. eigenvalues --   -0.26114
  Beta virt. eigenvalues --   -0.12438  -0.06760  -0.03382  -0.01899  -0.01608
  Beta virt. eigenvalues --    0.03100   0.04271   0.05326   0.05707   0.07874
  Beta virt. eigenvalues --    0.08719   0.09645   0.11772   0.13026   0.13102
  Beta virt. eigenvalues --    0.15518   0.18556   0.20283   0.21048   0.21626
  Beta virt. eigenvalues --    0.22288   0.24424   0.24852   0.25825   0.26987
  Beta virt. eigenvalues --    0.27836   0.28221   0.28340   0.28763   0.29676
  Beta virt. eigenvalues --    0.30187   0.31450   0.34775   0.35435   0.35538
  Beta virt. eigenvalues --    0.36767   0.37294   0.37891   0.37969   0.39434
  Beta virt. eigenvalues --    0.39896   0.40556   0.40921   0.41131   0.41508
  Beta virt. eigenvalues --    0.42496   0.43295   0.43641   0.43897   0.44621
  Beta virt. eigenvalues --    0.45103   0.45636   0.46072   0.47131   0.48265
  Beta virt. eigenvalues --    0.48645   0.51616   0.52623   0.54159   0.54407
  Beta virt. eigenvalues --    0.55759   0.56471   0.56739   0.58371   0.59350
  Beta virt. eigenvalues --    0.59629   0.60215   0.60955   0.61563   0.61905
  Beta virt. eigenvalues --    0.62745   0.63116   0.64459   0.66185   0.66270
  Beta virt. eigenvalues --    0.67033   0.70630   0.71207   0.72508   0.72524
  Beta virt. eigenvalues --    0.73015   0.73912   0.75718   0.76120   0.78649
  Beta virt. eigenvalues --    0.79275   0.80569   0.81353   0.82494   0.83509
  Beta virt. eigenvalues --    0.84396   0.84708   0.86754   0.88251   0.89961
  Beta virt. eigenvalues --    0.91988   0.92727   0.93573   0.96138   0.97296
  Beta virt. eigenvalues --    0.97599   0.98368   0.98875   1.00267   1.01079
  Beta virt. eigenvalues --    1.03727   1.04691   1.09996   1.10140   1.10372
  Beta virt. eigenvalues --    1.11124   1.11579   1.12740   1.14997   1.15481
  Beta virt. eigenvalues --    1.16682   1.18583   1.19551   1.20579   1.20711
  Beta virt. eigenvalues --    1.23930   1.25316   1.26388   1.27924   1.28447
  Beta virt. eigenvalues --    1.29774   1.33332   1.39392   1.41891   1.44282
  Beta virt. eigenvalues --    1.46058   1.46207   1.47885   1.48319   1.50247
  Beta virt. eigenvalues --    1.52571   1.54178   1.55998   1.57513   1.58033
  Beta virt. eigenvalues --    1.61329   1.66033   1.67215   1.68598   1.70312
  Beta virt. eigenvalues --    1.72367   1.74908   1.77820   1.78243   1.78859
  Beta virt. eigenvalues --    1.81715   1.82691   1.83893   1.84736   1.84834
  Beta virt. eigenvalues --    1.85165   1.87590   1.88049   1.88842   1.89327
  Beta virt. eigenvalues --    1.91318   1.91686   1.92007   1.93139   1.94844
  Beta virt. eigenvalues --    1.96183   1.97868   2.01990   2.05086   2.08390
  Beta virt. eigenvalues --    2.11402   2.14688   2.18995   2.19510   2.20224
  Beta virt. eigenvalues --    2.25175   2.26255   2.28910   2.31207   2.32165
  Beta virt. eigenvalues --    2.32651   2.34226   2.35891   2.36133   2.37600
  Beta virt. eigenvalues --    2.40848   2.47246   2.47704   2.52087   2.52751
  Beta virt. eigenvalues --    2.54128   2.56718   2.58055   2.58958   2.65486
  Beta virt. eigenvalues --    2.65652   2.69146   2.72929   2.74016   2.76775
  Beta virt. eigenvalues --    2.76891   2.80274   2.82215   2.82548   2.82719
  Beta virt. eigenvalues --    2.88284   2.89833   2.94140   2.96947   2.98345
  Beta virt. eigenvalues --    3.03701   3.03840   3.05640   3.08115   3.09037
  Beta virt. eigenvalues --    3.14488   3.14634   3.17497   3.19214   3.21384
  Beta virt. eigenvalues --    3.23863   3.26115   3.27128   3.27855   3.28907
  Beta virt. eigenvalues --    3.31377   3.32054   3.32752   3.35493   3.38905
  Beta virt. eigenvalues --    3.40813   3.43584   3.45324   3.50420   3.52190
  Beta virt. eigenvalues --    3.54096   3.57105   3.67458   3.68790   3.74690
  Beta virt. eigenvalues --    3.82225   3.91802   3.95445   4.11251   4.12813
  Beta virt. eigenvalues --    4.12863   4.16038   4.20361   4.36227   4.38572
  Beta virt. eigenvalues --    4.53848   4.75467   4.77807   4.79782   4.80538
  Beta virt. eigenvalues --    4.90990   5.09498   5.12368   5.54249   5.69213
  Beta virt. eigenvalues --    6.47327   7.45372   7.52736   7.62488  23.17162
  Beta virt. eigenvalues --   23.36520  23.73005  23.75952  23.77562  23.86480
  Beta virt. eigenvalues --   23.87818  23.90680  23.97482  24.00690  24.03875
  Beta virt. eigenvalues --   24.04387  24.11109  24.12785  47.76408  49.87436
  Beta virt. eigenvalues --   49.98745 289.65269 289.72563 289.845431020.51261
          Condensed to atoms (all electrons):
               1          2          3          4          5          6
     1  C    4.974970   0.523606  -0.033218  -0.049307  -0.031468   0.477946
     2  C    0.523606   5.070815   0.414603  -0.083970  -0.055831  -0.041428
     3  C   -0.033218   0.414603   5.253179   0.474619  -0.096683  -0.040175
     4  C   -0.049307  -0.083970   0.474619   5.582951   0.365149  -0.035374
     5  C   -0.031468  -0.055831  -0.096683   0.365149   5.149160   0.495056
     6  C    0.477946  -0.041428  -0.040175  -0.035374   0.495056   5.002119
     7  H    0.399956  -0.041965   0.006347   0.000521   0.005857  -0.042869
     8  H   -0.042689   0.400042  -0.044093   0.005446  -0.000454   0.006066
     9  H    0.006899  -0.000876   0.004804  -0.070217   0.403103  -0.039401
    10  H   -0.043634   0.006185   0.000293   0.007245  -0.042664   0.400830
    11  C   -0.001465   0.006812   0.019280   0.202095  -0.080263   0.012036
    12  O   -0.000005  -0.000012   0.006274  -0.165695   0.022210   0.001329
    13  C    0.011113  -0.058254   0.329979  -0.021738   0.019866  -0.001565
    14  C    0.000414  -0.002780  -0.110093  -0.052529   0.037827  -0.000705
    15  C   -0.000520   0.025206  -0.095550  -0.123806  -0.004609   0.000317
    16  C    0.000005   0.000076  -0.003764   0.036741  -0.001444  -0.000012
    17  C   -0.000001  -0.001226   0.018467  -0.001933   0.000033   0.000002
    18  C    0.000000   0.000006   0.000366  -0.000658  -0.000021   0.000000
    19  H    0.000001   0.000001  -0.000312   0.005304  -0.000243  -0.000005
    20  C    0.000000  -0.000013  -0.000239   0.000475   0.000006   0.000000
    21  H   -0.000001  -0.000074   0.001874  -0.000057  -0.000007   0.000000
    22  H    0.000000   0.000000  -0.000010   0.000007   0.000000   0.000000
    23  Br   0.000000   0.000000   0.000001  -0.000005   0.000000   0.000000
    24  O    0.000309   0.015093  -0.102096   0.004291  -0.000122   0.000034
    25  H    0.000050  -0.000413   0.006333  -0.000189   0.000041  -0.000003
               7          8          9         10         11         12
     1  C    0.399956  -0.042689   0.006899  -0.043634  -0.001465  -0.000005
     2  C   -0.041965   0.400042  -0.000876   0.006185   0.006812  -0.000012
     3  C    0.006347  -0.044093   0.004804   0.000293   0.019280   0.006274
     4  C    0.000521   0.005446  -0.070217   0.007245   0.202095  -0.165695
     5  C    0.005857  -0.000454   0.403103  -0.042664  -0.080263   0.022210
     6  C   -0.042869   0.006066  -0.039401   0.400830   0.012036   0.001329
     7  H    0.463599  -0.006054  -0.000264  -0.005746   0.000048   0.000000
     8  H   -0.006054   0.457464   0.000080  -0.000282  -0.000110   0.000004
     9  H   -0.000264   0.000080   0.470291  -0.006405  -0.010199   0.025381
    10  H   -0.005746  -0.000282  -0.006405   0.463746  -0.000395  -0.000048
    11  C    0.000048  -0.000110  -0.010199  -0.000395   4.808398   0.757682
    12  O    0.000000   0.000004   0.025381  -0.000048   0.757682   7.839095
    13  C   -0.000568  -0.013689  -0.000082   0.000045  -0.071039  -0.001960
    14  C    0.000007  -0.000108   0.004958  -0.000022   0.155710  -0.174356
    15  C   -0.000016   0.001939  -0.000187   0.000009   0.020513   0.006532
    16  C    0.000000  -0.000003  -0.000247   0.000000  -0.065800   0.023837
    17  C    0.000000  -0.000065   0.000003   0.000000   0.008173  -0.000007
    18  C    0.000000   0.000001  -0.000008   0.000000   0.014143   0.002237
    19  H    0.000000  -0.000001  -0.000111   0.000000  -0.010808   0.028995
    20  C    0.000000  -0.000003   0.000000   0.000000  -0.001775   0.000011
    21  H    0.000000  -0.000023   0.000000   0.000000  -0.000060   0.000005
    22  H    0.000000   0.000000   0.000000   0.000000   0.000027   0.000000
    23  Br   0.000000   0.000000   0.000000   0.000000  -0.000356  -0.000004
    24  O   -0.000060   0.013720   0.000001   0.000000   0.000121   0.000000
    25  H    0.000000  -0.000655  -0.000001   0.000000  -0.000130  -0.000001
              13         14         15         16         17         18
     1  C    0.011113   0.000414  -0.000520   0.000005  -0.000001   0.000000
     2  C   -0.058254  -0.002780   0.025206   0.000076  -0.001226   0.000006
     3  C    0.329979  -0.110093  -0.095550  -0.003764   0.018467   0.000366
     4  C   -0.021738  -0.052529  -0.123806   0.036741  -0.001933  -0.000658
     5  C    0.019866   0.037827  -0.004609  -0.001444   0.000033  -0.000021
     6  C   -0.001565  -0.000705   0.000317  -0.000012   0.000002   0.000000
     7  H   -0.000568   0.000007  -0.000016   0.000000   0.000000   0.000000
     8  H   -0.013689  -0.000108   0.001939  -0.000003  -0.000065   0.000001
     9  H   -0.000082   0.004958  -0.000187  -0.000247   0.000003  -0.000008
    10  H    0.000045  -0.000022   0.000009   0.000000   0.000000   0.000000
    11  C   -0.071039   0.155710   0.020513  -0.065800   0.008173   0.014143
    12  O   -0.001960  -0.174356   0.006532   0.023837  -0.000007   0.002237
    13  C    5.060099   0.028907   0.181838   0.015223  -0.040496  -0.001722
    14  C    0.028907   5.580022   0.456936   0.345897  -0.041010  -0.025476
    15  C    0.181838   0.456936   5.456951  -0.098035   0.358172  -0.043010
    16  C    0.015223   0.345897  -0.098035   5.229766  -0.062472   0.429480
    17  C   -0.040496  -0.041010   0.358172  -0.062472   5.112948  -0.033016
    18  C   -0.001722  -0.025476  -0.043010   0.429480  -0.033016   5.151727
    19  H    0.000251  -0.068552   0.005395   0.400839  -0.001926  -0.047147
    20  C    0.014342  -0.048887  -0.033505  -0.030135   0.530064   0.441967
    21  H    0.006180   0.001712  -0.075693   0.000090   0.389720   0.005959
    22  H   -0.000433  -0.000158   0.006419   0.006216  -0.033874  -0.050502
    23  Br  -0.000006   0.010165  -0.000565  -0.090059   0.009566   0.285484
    24  O    0.398403   0.001088  -0.114749  -0.000061   0.004005  -0.000034
    25  H   -0.046259   0.000687  -0.013675   0.000053   0.011242  -0.000013
              19         20         21         22         23         24
     1  C    0.000001   0.000000  -0.000001   0.000000   0.000000   0.000309
     2  C    0.000001  -0.000013  -0.000074   0.000000   0.000000   0.015093
     3  C   -0.000312  -0.000239   0.001874  -0.000010   0.000001  -0.102096
     4  C    0.005304   0.000475  -0.000057   0.000007  -0.000005   0.004291
     5  C   -0.000243   0.000006  -0.000007   0.000000   0.000000  -0.000122
     6  C   -0.000005   0.000000   0.000000   0.000000   0.000000   0.000034
     7  H    0.000000   0.000000   0.000000   0.000000   0.000000  -0.000060
     8  H   -0.000001  -0.000003  -0.000023   0.000000   0.000000   0.013720
     9  H   -0.000111   0.000000   0.000000   0.000000   0.000000   0.000001
    10  H    0.000000   0.000000   0.000000   0.000000   0.000000   0.000000
    11  C   -0.010808  -0.001775  -0.000060   0.000027  -0.000356   0.000121
    12  O    0.028995   0.000011   0.000005   0.000000  -0.000004   0.000000
    13  C    0.000251   0.014342   0.006180  -0.000433  -0.000006   0.398403
    14  C   -0.068552  -0.048887   0.001712  -0.000158   0.010165   0.001088
    15  C    0.005395  -0.033505  -0.075693   0.006419  -0.000565  -0.114749
    16  C    0.400839  -0.030135   0.000090   0.006216  -0.090059  -0.000061
    17  C   -0.001926   0.530064   0.389720  -0.033874   0.009566   0.004005
    18  C   -0.047147   0.441967   0.005959  -0.050502   0.285484  -0.000034
    19  H    0.455126   0.007890   0.000084  -0.000147  -0.005136   0.000003
    20  C    0.007890   4.972510  -0.016675   0.399093  -0.079475   0.001297
    21  H    0.000084  -0.016675   0.462468  -0.006547  -0.000306  -0.000557
    22  H   -0.000147   0.399093  -0.006547   0.443335  -0.004201  -0.000003
    23  Br  -0.005136  -0.079475  -0.000306  -0.004201  34.900787   0.000000
    24  O    0.000003   0.001297  -0.000557  -0.000003   0.000000   8.042260
    25  H    0.000000   0.000558   0.007026   0.000031  -0.000001   0.277244
              25
     1  C    0.000050
     2  C   -0.000413
     3  C    0.006333
     4  C   -0.000189
     5  C    0.000041
     6  C   -0.000003
     7  H    0.000000
     8  H   -0.000655
     9  H   -0.000001
    10  H    0.000000
    11  C   -0.000130
    12  O   -0.000001
    13  C   -0.046259
    14  C    0.000687
    15  C   -0.013675
    16  C    0.000053
    17  C    0.011242
    18  C   -0.000013
    19  H    0.000000
    20  C    0.000558
    21  H    0.007026
    22  H    0.000031
    23  Br  -0.000001
    24  O    0.277244
    25  H    0.320949
          Atomic-Atomic Spin Densities.
               1          2          3          4          5          6
     1  C   -0.057296   0.012933  -0.001150   0.002641  -0.001111  -0.011320
     2  C    0.012933   0.127625  -0.010921   0.006534  -0.000486  -0.007522
     3  C   -0.001150  -0.010921  -0.088658  -0.016296   0.003630   0.002330
     4  C    0.002641   0.006534  -0.016296   0.136410  -0.012898  -0.008524
     5  C   -0.001111  -0.000486   0.003630  -0.012898  -0.051140   0.015273
     6  C   -0.011320  -0.007522   0.002330  -0.008524   0.015273   0.126986
     7  H    0.000614  -0.000291   0.000067  -0.000030   0.000022  -0.000122
     8  H    0.000508  -0.000821   0.000555  -0.000088   0.000015  -0.000042
     9  H   -0.000044   0.000038  -0.000046   0.001329   0.000596  -0.000423
    10  H    0.000221  -0.000018  -0.000044   0.000010  -0.000179  -0.000507
    11  C    0.000061   0.000024  -0.000395   0.025261   0.000666  -0.000477
    12  O   -0.000003  -0.000006   0.000166  -0.005626   0.000814   0.000043
    13  C   -0.000671  -0.011406   0.030302  -0.012717   0.000137   0.000386
    14  C    0.000009   0.000076  -0.001670   0.003518  -0.000516  -0.000041
    15  C    0.000014  -0.000509  -0.001642  -0.001492  -0.000113   0.000016
    16  C    0.000000  -0.000012  -0.000191  -0.000355   0.000067   0.000000
    17  C    0.000000   0.000080  -0.000342   0.000080  -0.000010   0.000000
    18  C    0.000000   0.000000   0.000018  -0.000049   0.000000   0.000000
    19  H    0.000000   0.000000  -0.000007  -0.000066   0.000012   0.000000
    20  C    0.000000   0.000000  -0.000002   0.000013   0.000000   0.000000
    21  H    0.000000   0.000004  -0.000038  -0.000001   0.000000   0.000000
    22  H    0.000000   0.000000   0.000000   0.000000   0.000000   0.000000
    23  Br   0.000000   0.000000   0.000000   0.000001   0.000000   0.000000
    24  O    0.000019   0.002744  -0.001658   0.000320  -0.000003  -0.000007
    25  H   -0.000002   0.000017  -0.000091  -0.000013  -0.000001   0.000000
               7          8          9         10         11         12
     1  C    0.000614   0.000508  -0.000044   0.000221   0.000061  -0.000003
     2  C   -0.000291  -0.000821   0.000038  -0.000018   0.000024  -0.000006
     3  C    0.000067   0.000555  -0.000046  -0.000044  -0.000395   0.000166
     4  C   -0.000030  -0.000088   0.001329   0.000010   0.025261  -0.005626
     5  C    0.000022   0.000015   0.000596  -0.000179   0.000666   0.000814
     6  C   -0.000122  -0.000042  -0.000423  -0.000507  -0.000477   0.000043
     7  H    0.001855   0.000023  -0.000002   0.000054  -0.000001   0.000000
     8  H    0.000023  -0.006002  -0.000001   0.000004  -0.000002   0.000000
     9  H   -0.000002  -0.000001   0.000653   0.000068   0.000123  -0.000604
    10  H    0.000054   0.000004   0.000068  -0.005990   0.000008   0.000001
    11  C   -0.000001  -0.000002   0.000123   0.000008  -0.020234  -0.031203
    12  O    0.000000   0.000000  -0.000604   0.000001  -0.031203   0.221940
    13  C    0.000000   0.000130  -0.000016   0.000000  -0.000901   0.000129
    14  C    0.000000  -0.000006  -0.000066   0.000000   0.025852  -0.006475
    15  C    0.000000  -0.000042  -0.000007   0.000000  -0.000978   0.000220
    16  C    0.000000   0.000000   0.000011   0.000000   0.000326   0.000785
    17  C    0.000000   0.000005   0.000000   0.000000   0.000073  -0.000006
    18  C    0.000000   0.000000   0.000000   0.000000  -0.000480   0.000036
    19  H    0.000000   0.000000   0.000006   0.000000   0.000117  -0.000690
    20  C    0.000000   0.000000   0.000000   0.000000   0.000034  -0.000003
    21  H    0.000000   0.000001   0.000000   0.000000  -0.000005   0.000000
    22  H    0.000000   0.000000   0.000000   0.000000  -0.000001   0.000000
    23  Br   0.000000   0.000000   0.000000   0.000000   0.000014  -0.000003
    24  O    0.000000  -0.000130   0.000000   0.000000   0.000015   0.000000
    25  H    0.000000   0.000011   0.000000   0.000000   0.000007   0.000000
              13         14         15         16         17         18
     1  C   -0.000671   0.000009   0.000014   0.000000   0.000000   0.000000
     2  C   -0.011406   0.000076  -0.000509  -0.000012   0.000080   0.000000
     3  C    0.030302  -0.001670  -0.001642  -0.000191  -0.000342   0.000018
     4  C   -0.012717   0.003518  -0.001492  -0.000355   0.000080  -0.000049
     5  C    0.000137  -0.000516  -0.000113   0.000067  -0.000010   0.000000
     6  C    0.000386  -0.000041   0.000016   0.000000   0.000000   0.000000
     7  H    0.000000   0.000000   0.000000   0.000000   0.000000   0.000000
     8  H    0.000130  -0.000006  -0.000042   0.000000   0.000005   0.000000
     9  H   -0.000016  -0.000066  -0.000007   0.000011   0.000000   0.000000
    10  H    0.000000   0.000000   0.000000   0.000000   0.000000   0.000000
    11  C   -0.000901   0.025852  -0.000978   0.000326   0.000073  -0.000480
    12  O    0.000129  -0.006475   0.000220   0.000785  -0.000006   0.000036
    13  C    0.433950  -0.013650   0.037522   0.000295  -0.011778   0.000414
    14  C   -0.013650   0.175541  -0.025153  -0.012860   0.007766  -0.009913
    15  C    0.037522  -0.025153  -0.083158   0.004214  -0.015440   0.002677
    16  C    0.000295  -0.012860   0.004214  -0.067554  -0.000651   0.015738
    17  C   -0.011778   0.007766  -0.015440  -0.000651   0.134849  -0.008595
    18  C    0.000414  -0.009913   0.002677   0.015738  -0.008595   0.154996
    19  H   -0.000020   0.001488  -0.000029   0.000959   0.000048  -0.000535
    20  C   -0.000749   0.002362  -0.000548  -0.000326   0.013528  -0.012520
    21  H   -0.000041  -0.000012   0.000888  -0.000004  -0.000753  -0.000032
    22  H   -0.000001  -0.000028   0.000071   0.000017  -0.000296  -0.000095
    23  Br  -0.000004   0.000383  -0.000088  -0.000693   0.000266  -0.014260
    24  O   -0.072398   0.000455  -0.000029  -0.000001   0.001769  -0.000005
    25  H    0.000022   0.000009   0.000239   0.000000  -0.000095  -0.000001
              19         20         21         22         23         24
     1  C    0.000000   0.000000   0.000000   0.000000   0.000000   0.000019
     2  C    0.000000   0.000000   0.000004   0.000000   0.000000   0.002744
     3  C   -0.000007  -0.000002  -0.000038   0.000000   0.000000  -0.001658
     4  C   -0.000066   0.000013  -0.000001   0.000000   0.000001   0.000320
     5  C    0.000012   0.000000   0.000000   0.000000   0.000000  -0.000003
     6  C    0.000000   0.000000   0.000000   0.000000   0.000000  -0.000007
     7  H    0.000000   0.000000   0.000000   0.000000   0.000000   0.000000
     8  H    0.000000   0.000000   0.000001   0.000000   0.000000  -0.000130
     9  H    0.000006   0.000000   0.000000   0.000000   0.000000   0.000000
    10  H    0.000000   0.000000   0.000000   0.000000   0.000000   0.000000
    11  C    0.000117   0.000034  -0.000005  -0.000001   0.000014   0.000015
    12  O   -0.000690  -0.000003   0.000000   0.000000  -0.000003   0.000000
    13  C   -0.000020  -0.000749  -0.000041  -0.000001  -0.000004  -0.072398
    14  C    0.001488   0.002362  -0.000012  -0.000028   0.000383   0.000455
    15  C   -0.000029  -0.000548   0.000888   0.000071  -0.000088  -0.000029
    16  C    0.000959  -0.000326  -0.000004   0.000017  -0.000693  -0.000001
    17  C    0.000048   0.013528  -0.000753  -0.000296   0.000266   0.001769
    18  C   -0.000535  -0.012520  -0.000032  -0.000095  -0.014260  -0.000005
    19  H    0.000929  -0.000082  -0.000001  -0.000001   0.000046   0.000000
    20  C   -0.000082  -0.063502   0.000151   0.000719   0.001784   0.000009
    21  H   -0.000001   0.000151  -0.006031   0.000027   0.000003   0.000104
    22  H   -0.000001   0.000719   0.000027   0.002034   0.000035   0.000000
    23  Br   0.000046   0.001784   0.000003   0.000035   0.021359   0.000000
    24  O    0.000000   0.000009   0.000104   0.000000   0.000000   0.159638
    25  H    0.000000   0.000014  -0.000112   0.000001   0.000000  -0.001129
              25
     1  C   -0.000002
     2  C    0.000017
     3  C   -0.000091
     4  C   -0.000013
     5  C   -0.000001
     6  C    0.000000
     7  H    0.000000
     8  H    0.000011
     9  H    0.000000
    10  H    0.000000
    11  C    0.000007
    12  O    0.000000
    13  C    0.000022
    14  C    0.000009
    15  C    0.000239
    16  C    0.000000
    17  C   -0.000095
    18  C   -0.000001
    19  H    0.000000
    20  C    0.000014
    21  H   -0.000112
    22  H    0.000001
    23  Br   0.000000
    24  O   -0.001129
    25  H   -0.002583
 Mulliken charges and spin densities:
               1          2
     1  C   -0.192960  -0.054577
     2  C   -0.175601   0.118083
     3  C   -0.010187  -0.086086
     4  C   -0.079368   0.117962
     5  C   -0.184498  -0.045225
     6  C   -0.194197   0.116050
     7  H    0.221208   0.002188
     8  H    0.223468  -0.005883
     9  H    0.212476   0.001616
    10  H    0.220844  -0.006371
    11  C    0.237364  -0.002095
    12  O   -0.371503   0.179514
    13  C    0.191567   0.378935
    14  C   -0.099655   0.147067
    15  C    0.083694  -0.083367
    16  C   -0.136192  -0.060236
    17  C   -0.226371   0.120497
    18  C   -0.129762   0.127394
    19  H    0.230498   0.002175
    20  C   -0.157506  -0.059118
    21  H    0.224883  -0.005851
    22  H    0.240747   0.002481
    23  Br  -0.025891   0.008842
    24  O   -0.540187   0.089713
    25  H    0.437127  -0.003706
 Sum of Mulliken charges =   0.00000   1.00000
 Mulliken charges and spin densities with hydrogens summed into heavy atoms:
               1          2
     1  C    0.028249  -0.052388
     2  C    0.047867   0.112200
     3  C   -0.010187  -0.086086
     4  C   -0.079368   0.117962
     5  C    0.027978  -0.043610
     6  C    0.026647   0.109678
    11  C    0.237364  -0.002095
    12  O   -0.371503   0.179514
    13  C    0.191567   0.378935
    14  C   -0.099655   0.147067
    15  C    0.083694  -0.083367
    16  C    0.094306  -0.058061
    17  C   -0.001488   0.114646
    18  C   -0.129762   0.127394
    20  C    0.083241  -0.056637
    23  Br  -0.025891   0.008842
    24  O   -0.103060   0.086007
 Electronic spatial extent (au):  <R**2>=           6256.7679
 Charge=              0.0000 electrons
 Dipole moment (field-independent basis, Debye):
    X=              1.9225    Y=              6.7527    Z=              0.0000  Tot=              7.0210
 Quadrupole moment (field-independent basis, Debye-Ang):
   XX=            -96.9493   YY=           -101.2807   ZZ=           -113.9295
   XY=             -3.2454   XZ=              0.0003   YZ=              0.0001
 Traceless Quadrupole moment (field-independent basis, Debye-Ang):
   XX=              7.1039   YY=              2.7725   ZZ=             -9.8764
   XY=             -3.2454   XZ=              0.0003   YZ=              0.0001
 Octapole moment (field-independent basis, Debye-Ang**2):
  XXX=            -21.1062  YYY=             70.6278  ZZZ=             -0.0005  XYY=            -44.8212
  XXY=            -15.0308  XXZ=              0.0031  XZZ=            -51.1561  YZZ=             -3.8444
  YYZ=              0.0003  XYZ=             -0.0007
 Hexadecapole moment (field-independent basis, Debye-Ang**3):
 XXXX=          -5276.1897 YYYY=          -1239.9449 ZZZZ=           -125.3844 XXXY=             -8.0338
 XXXZ=             -0.0211 YYYX=             48.6398 YYYZ=              0.0134 ZZZX=             -0.0448
 ZZZY=              0.0117 XXYY=          -1144.2588 XXZZ=          -1093.8856 YYZZ=           -261.0155
 XXYZ=             -0.0030 YYXZ=             -0.0108 ZZXY=             30.7425
 N-N= 1.392188016329D+03 E-N=-1.054266599726D+04  KE= 3.257437095404D+03
                          Isotropic Fermi Contact Couplings
        Atom                 a.u.       MegaHertz       Gauss      10(-4) cm-1
     1  C(13)             -0.00769      -8.64450      -3.08457      -2.88349
     2  C(13)              0.00727       8.17796       2.91810       2.72787
     3  C(13)             -0.01860     -20.91217      -7.46198      -6.97555
     4  C(13)              0.00601       6.75508       2.41038       2.25325
     5  C(13)             -0.00791      -8.89720      -3.17474      -2.96779
     6  C(13)              0.00755       8.48880       3.02901       2.83156
     7  H(1)               0.00057       2.56529       0.91536       0.85569
     8  H(1)              -0.00161      -7.21792      -2.57553      -2.40764
     9  H(1)               0.00050       2.25369       0.80417       0.75175
    10  H(1)              -0.00168      -7.52856      -2.68638      -2.51126
    11  C(13)             -0.01174     -13.19321      -4.70766      -4.40078
    12  O(17)              0.01621      -9.82621      -3.50623      -3.27767
    13  C(13)              0.02471      27.77731       9.91163       9.26551
    14  C(13)              0.00774       8.70066       3.10461       2.90223
    15  C(13)             -0.01923     -21.61850      -7.71402      -7.21116
    16  C(13)             -0.00964     -10.83302      -3.86549      -3.61351
    17  C(13)              0.00781       8.78203       3.13364       2.92937
    18  C(13)              0.01183      13.30046       4.74593       4.43656
    19  H(1)               0.00069       3.09347       1.10383       1.03187
    20  C(13)             -0.00861      -9.67907      -3.45373      -3.22859
    21  H(1)              -0.00165      -7.39423      -2.63844      -2.46645
    22  H(1)               0.00067       2.98730       1.06594       0.99646
    23  Br(79)             0.00250       2.81205       1.00341       0.93800
    24  O(17)              0.01507      -9.13636      -3.26008      -3.04756
    25  H(1)              -0.00175      -7.80911      -2.78649      -2.60484
 --------------------------------------------------------
       Center         ----  Spin Dipole Couplings  ----
                      3XX-RR        3YY-RR        3ZZ-RR
 --------------------------------------------------------
     1   Atom        0.022168      0.024445     -0.046613
     2   Atom       -0.055633     -0.059295      0.114928
     3   Atom        0.033186      0.028322     -0.061508
     4   Atom       -0.061023     -0.062902      0.123925
     5   Atom        0.026136      0.016663     -0.042798
     6   Atom       -0.061796     -0.063484      0.125280
     7   Atom        0.000805      0.001240     -0.002045
     8   Atom       -0.001395      0.005011     -0.003616
     9   Atom        0.005401     -0.001869     -0.003532
    10   Atom        0.003007     -0.001668     -0.001339
    11   Atom       -0.020631      0.002827      0.017804
    12   Atom       -0.379703     -0.382388      0.762091
    13   Atom       -0.253138     -0.252602      0.505741
    14   Atom       -0.077200     -0.078928      0.156128
    15   Atom        0.034443      0.021383     -0.055826
    16   Atom        0.032648      0.023106     -0.055754
    17   Atom       -0.058349     -0.061954      0.120302
    18   Atom       -0.074559     -0.081993      0.156552
    19   Atom        0.006224     -0.002311     -0.003913
    20   Atom        0.027490      0.025930     -0.053420
    21   Atom       -0.003854      0.007237     -0.003383
    22   Atom        0.002273     -0.000104     -0.002170
    23   Atom       -0.149591     -0.076202      0.225793
    24   Atom       -0.264998     -0.264785      0.529783
    25   Atom        0.004228      0.006554     -0.010782
 --------------------------------------------------------
                        XY            XZ            YZ
 --------------------------------------------------------
     1   Atom       -0.002398      0.000002     -0.000002
     2   Atom       -0.001306     -0.000004      0.000005
     3   Atom       -0.005991      0.000000      0.000001
     4   Atom       -0.000920     -0.000008      0.000010
     5   Atom       -0.001420      0.000002     -0.000001
     6   Atom       -0.002754     -0.000006      0.000004
     7   Atom       -0.002039      0.000000      0.000000
     8   Atom        0.002923      0.000000      0.000000
     9   Atom       -0.001573      0.000000      0.000000
    10   Atom       -0.008709      0.000000      0.000000
    11   Atom        0.005043     -0.000001      0.000001
    12   Atom       -0.000529     -0.000019      0.000053
    13   Atom        0.000758     -0.000028     -0.000034
    14   Atom       -0.000282      0.000004      0.000008
    15   Atom        0.002613      0.000005      0.000001
    16   Atom       -0.002855      0.000001     -0.000001
    17   Atom       -0.000664     -0.000001      0.000000
    18   Atom        0.001834      0.000001      0.000004
    19   Atom       -0.001750      0.000000      0.000000
    20   Atom        0.002509      0.000000     -0.000001
    21   Atom        0.000054      0.000000      0.000000
    22   Atom        0.001790      0.000000      0.000000
    23   Atom       -0.024267      0.000000      0.000006
    24   Atom       -0.008106     -0.000024     -0.000054
    25   Atom       -0.019155     -0.000001      0.000001
 --------------------------------------------------------


 ---------------------------------------------------------------------------------
              Anisotropic Spin Dipole Couplings in Principal Axis System
 ---------------------------------------------------------------------------------

       Atom             a.u.   MegaHertz   Gauss  10(-4) cm-1        Axes

              Baa    -0.0466    -6.255    -2.232    -2.086  0.0000  0.0000  1.0000
     1 C(13)  Bbb     0.0207     2.771     0.989     0.924  0.8452  0.5344  0.0000
              Bcc     0.0260     3.484     1.243     1.162 -0.5344  0.8452  0.0000
 
              Baa    -0.0597    -8.013    -2.859    -2.673  0.3048  0.9524  0.0000
     2 C(13)  Bbb    -0.0552    -7.409    -2.644    -2.471  0.9524 -0.3048  0.0000
              Bcc     0.1149    15.422     5.503     5.144  0.0000  0.0000  1.0000
 
              Baa    -0.0615    -8.254    -2.945    -2.753  0.0000  0.0000  1.0000
     3 C(13)  Bbb     0.0243     3.259     1.163     1.087  0.5585  0.8295  0.0000
              Bcc     0.0372     4.995     1.782     1.666  0.8295 -0.5585  0.0000
 
              Baa    -0.0633    -8.491    -3.030    -2.832  0.3778  0.9259  0.0000
     4 C(13)  Bbb    -0.0606    -8.138    -2.904    -2.715  0.9259 -0.3778  0.0001
              Bcc     0.1239    16.630     5.934     5.547  0.0000  0.0001  1.0000
 
              Baa    -0.0428    -5.743    -2.049    -1.916  0.0000  0.0000  1.0000
     5 C(13)  Bbb     0.0165     2.208     0.788     0.737  0.1451  0.9894  0.0000
              Bcc     0.0263     3.535     1.261     1.179  0.9894 -0.1451  0.0000
 
              Baa    -0.0655    -8.792    -3.137    -2.933  0.5945  0.8041  0.0000
     6 C(13)  Bbb    -0.0598    -8.019    -2.861    -2.675  0.8041 -0.5945  0.0000
              Bcc     0.1253    16.811     5.999     5.608  0.0000  0.0000  1.0000
 
              Baa    -0.0020    -1.091    -0.389    -0.364  0.0000  0.0000  1.0000
     7 H(1)   Bbb    -0.0010    -0.548    -0.196    -0.183  0.7437  0.6685  0.0000
              Bcc     0.0031     1.639     0.585     0.547 -0.6685  0.7437  0.0000
 
              Baa    -0.0036    -1.930    -0.689    -0.644  0.0000  0.0000  1.0000
     8 H(1)   Bbb    -0.0025    -1.349    -0.481    -0.450  0.9324 -0.3615  0.0000
              Bcc     0.0061     3.278     1.170     1.094  0.3615  0.9324  0.0000
 
              Baa    -0.0035    -1.884    -0.672    -0.629  0.0000  0.0001  1.0000
     9 H(1)   Bbb    -0.0022    -1.171    -0.418    -0.391  0.2028  0.9792  0.0000
              Bcc     0.0057     3.055     1.090     1.019  0.9792 -0.2028  0.0000
 
              Baa    -0.0083    -4.454    -1.589    -1.486  0.6086  0.7935  0.0000
    10 H(1)   Bbb    -0.0013    -0.714    -0.255    -0.238  0.0000  0.0000  1.0000
              Bcc     0.0097     5.168     1.844     1.724  0.7935 -0.6086  0.0000
 
              Baa    -0.0217    -2.908    -1.038    -0.970  0.9795 -0.2016  0.0000
    11 C(13)  Bbb     0.0039     0.519     0.185     0.173  0.2016  0.9795 -0.0001
              Bcc     0.0178     2.389     0.852     0.797  0.0000  0.0001  1.0000
 
              Baa    -0.3825    27.677     9.876     9.232  0.1867  0.9824  0.0000
    12 O(17)  Bbb    -0.3796    27.468     9.801     9.162  0.9824 -0.1867  0.0000
              Bcc     0.7621   -55.144   -19.677   -18.394  0.0000  0.0000  1.0000
 
              Baa    -0.2537   -34.041   -12.147   -11.355  0.8165 -0.5773  0.0000
    13 C(13)  Bbb    -0.2521   -33.825   -12.070   -11.283  0.5773  0.8165  0.0001
              Bcc     0.5057    67.866    24.216    22.638  0.0000  0.0000  1.0000
 
              Baa    -0.0790   -10.597    -3.781    -3.535  0.1573  0.9875  0.0000
    14 C(13)  Bbb    -0.0772   -10.353    -3.694    -3.454  0.9875 -0.1573  0.0000
              Bcc     0.1561    20.951     7.476     6.988  0.0000  0.0000  1.0000
 
              Baa    -0.0558    -7.491    -2.673    -2.499 -0.0001  0.0000  1.0000
    15 C(13)  Bbb     0.0209     2.802     1.000     0.935 -0.1892  0.9819  0.0000
              Bcc     0.0349     4.689     1.673     1.564  0.9819  0.1892  0.0001
 
              Baa    -0.0558    -7.482    -2.670    -2.496  0.0000  0.0000  1.0000
    16 C(13)  Bbb     0.0223     2.995     1.069     0.999  0.2664  0.9639  0.0000
              Bcc     0.0334     4.487     1.601     1.497  0.9639 -0.2664  0.0000
 
              Baa    -0.0621    -8.330    -2.972    -2.778  0.1756  0.9845  0.0000
    17 C(13)  Bbb    -0.0582    -7.814    -2.788    -2.606  0.9845 -0.1756  0.0000
              Bcc     0.1203    16.143     5.760     5.385  0.0000  0.0000  1.0000
 
              Baa    -0.0824   -11.060    -3.947    -3.689 -0.2272  0.9738  0.0000
    18 C(13)  Bbb    -0.0741    -9.948    -3.550    -3.318  0.9738  0.2272  0.0000
              Bcc     0.1566    21.008     7.496     7.007  0.0000  0.0000  1.0000
 
              Baa    -0.0039    -2.088    -0.745    -0.696  0.0000  0.0000  1.0000
    19 H(1)   Bbb    -0.0027    -1.417    -0.506    -0.473  0.1934  0.9811  0.0000
              Bcc     0.0066     3.505     1.251     1.169  0.9811 -0.1934  0.0000
 
              Baa    -0.0534    -7.168    -2.558    -2.391  0.0000  0.0000  1.0000
    20 C(13)  Bbb     0.0241     3.232     1.153     1.078 -0.5930  0.8052  0.0000
              Bcc     0.0293     3.937     1.405     1.313  0.8052  0.5930  0.0000
 
              Baa    -0.0039    -2.056    -0.734    -0.686  1.0000 -0.0049  0.0000
    21 H(1)   Bbb    -0.0034    -1.805    -0.644    -0.602  0.0000  0.0000  1.0000
              Bcc     0.0072     3.861     1.378     1.288  0.0049  1.0000  0.0000
 
              Baa    -0.0022    -1.158    -0.413    -0.386  0.0000  0.0000  1.0000
    22 H(1)   Bbb    -0.0011    -0.567    -0.202    -0.189 -0.4727  0.8812  0.0000
              Bcc     0.0032     1.725     0.616     0.575  0.8812  0.4727  0.0000
 
              Baa    -0.1569   -21.045    -7.509    -7.020  0.9576  0.2880  0.0000
    23 Br(79) Bbb    -0.0689    -9.243    -3.298    -3.083 -0.2880  0.9576  0.0000
              Bcc     0.2258    30.287    10.807    10.103  0.0000  0.0000  1.0000
 
              Baa    -0.2730    19.754     7.049     6.589  0.7117  0.7025  0.0001
    24 O(17)  Bbb    -0.2568    18.581     6.630     6.198 -0.7025  0.7117  0.0000
              Bcc     0.5298   -38.335   -13.679   -12.787  0.0000 -0.0001  1.0000
 
              Baa    -0.0138    -7.362    -2.627    -2.456  0.7282  0.6853  0.0001
    25 H(1)   Bbb    -0.0108    -5.753    -2.053    -1.919  0.0000 -0.0001  1.0000
              Bcc     0.0246    13.115     4.680     4.375 -0.6853  0.7282  0.0000
 

 ---------------------------------------------------------------------------------

 1|1|UNPC-SHENGFULIAO-PC|FOpt|UB3LYP|6-311G(d)|C14H8Br1O2(2)|SHENGFU LI
 AO|21-Jul-2020|0||# opt b3lyp/6-311g(d) scrf=(solvent=acetonitrile) ge
 om=connectivity empiricaldispersion=gd3bj||HS2 opt||0,2|C,-5.064459298
 3,0.0667291796,-0.000085852|C,-4.0387225576,0.9900592497,-0.0000304206
 |C,-2.6897647283,0.562533486,0.0000032142|C,-2.4098660187,-0.830977574
 5,-0.0000259386|C,-3.4711043795,-1.746863714,-0.0000819549|C,-4.784120
 006,-1.3110619434,-0.0001109314|H,-6.0938311468,0.4075643531,-0.000111
 5276|H,-4.255643067,2.0500458226,-0.0000117164|H,-3.2320609758,-2.8031
 486681,-0.0000997321|H,-5.5962426377,-2.0290997699,-0.000154479|C,-1.0
 281317305,-1.3277412025,0.0000106852|O,-0.7655054416,-2.5380600459,-0.
 000041301|C,-1.6186873102,1.5030442464,0.0000561522|C,0.0382230312,-0.
 3110879909,0.0000370207|C,-0.2583876553,1.0829744546,0.0000662033|C,1.
 3695400662,-0.7441925162,0.0000320913|C,0.8265071124,1.9956342113,0.00
 00722032|C,2.3951593917,0.1785487516,0.0000490986|H,1.5607378944,-1.80
 90367075,0.0000119741|C,2.1325439455,1.5579984681,0.000066908|H,0.6629
 116423,3.0677557946,0.000066367|H,2.9463568931,2.2714891368,0.00006803
 13|Br,4.2133745653,-0.4200430569,0.0000339432|O,-1.9816312264,2.800971
 4319,-0.0000478783|H,-1.2197683926,3.3922747534,-0.0000686303||Version
 =IA32W-G09RevD.01|State=2-A|HF=-3263.1239715|S2=0.772146|S2-1=0.|S2A=0
 .750406|RMSD=8.999e-009|RMSF=5.307e-005|Dipole=-0.7309723,2.6638133,0.
 |Quadrupole=5.3273459,2.0154808,-7.3428267,2.3816843,0.0002435,-0.0000
 754|PG=C01 [X(C14H8Br1O2)]||@


 WHEN ALL ELSE FAILS, TRY THE BOSS'S SUGGESTION.
 Job cpu time:       0 days  1 hours 21 minutes 48.0 seconds.
 File lengths (MBytes):  RWF=    218 Int=      0 D2E=      0 Chk=     15 Scr=      1
 Normal termination of Gaussian 09 at Tue Jul 21 13:22:56 2020.
