# Supplementary material for: 2-Bromoanthraquinone as a highly efficient photocatalyst for the oxidation of sec-aromatic alcohols: experimental and DFT study
Source: Royal Society of Chemistry journal article supplement (doi:10.1039/d0ra06414a), 2020-01-01
Supplement: d0ra06414a4.out [file d0ra06414a4.out]

 Entering Link 1 = E:\Gaussian\G09W\l1.exe PID=    150128.
  
 Copyright (c) 1988,1990,1992,1993,1995,1998,2003,2009,2013,
            Gaussian, Inc.  All Rights Reserved.
  
 This is part of the Gaussian(R) 09 program.  It is based on
 the Gaussian(R) 03 system (copyright 2003, Gaussian, Inc.),
 the Gaussian(R) 98 system (copyright 1998, Gaussian, Inc.),
 the Gaussian(R) 94 system (copyright 1995, Gaussian, Inc.),
 the Gaussian 92(TM) system (copyright 1992, Gaussian, Inc.),
 the Gaussian 90(TM) system (copyright 1990, Gaussian, Inc.),
 the Gaussian 88(TM) system (copyright 1988, Gaussian, Inc.),
 the Gaussian 86(TM) system (copyright 1986, Carnegie Mellon
 University), and the Gaussian 82(TM) system (copyright 1983,
 Carnegie Mellon University). Gaussian is a federally registered
 trademark of Gaussian, Inc.
  
 This software contains proprietary and confidential information,
 including trade secrets, belonging to Gaussian, Inc.
  
 This software is provided under written license and may be
 used, copied, transmitted, or stored only in accord with that
 written license.
  
 The following legend is applicable only to US Government
 contracts under FAR:
  
                    RESTRICTED RIGHTS LEGEND
  
 Use, reproduction and disclosure by the US Government is
 subject to restrictions as set forth in subparagraphs (a)
 and (c) of the Commercial Computer Software - Restricted
 Rights clause in FAR 52.227-19.
  
 Gaussian, Inc.
 340 Quinnipiac St., Bldg. 40, Wallingford CT 06492
  
  
 ---------------------------------------------------------------
 Warning -- This program may not be used in any manner that
 competes with the business of Gaussian, Inc. or will provide
 assistance to any competitor of Gaussian, Inc.  The licensee
 of this program is prohibited from giving any competitor of
 Gaussian, Inc. access to this program.  By using this program,
 the user acknowledges that Gaussian, Inc. is engaged in the
 business of creating and licensing software in the field of
 computational chemistry and represents and warrants to the
 licensee that it is not a competitor of Gaussian, Inc. and that
 it will not use this program in any manner prohibited above.
 ---------------------------------------------------------------
  

 Cite this work as:
 Gaussian 09, Revision D.01,
 M. J. Frisch, G. W. Trucks, H. B. Schlegel, G. E. Scuseria, 
 M. A. Robb, J. R. Cheeseman, G. Scalmani, V. Barone, B. Mennucci, 
 G. A. Petersson, H. Nakatsuji, M. Caricato, X. Li, H. P. Hratchian, 
 A. F. Izmaylov, J. Bloino, G. Zheng, J. L. Sonnenberg, M. Hada, 
 M. Ehara, K. Toyota, R. Fukuda, J. Hasegawa, M. Ishida, T. Nakajima, 
 Y. Honda, O. Kitao, H. Nakai, T. Vreven, J. A. Montgomery, Jr., 
 J. E. Peralta, F. Ogliaro, M. Bearpark, J. J. Heyd, E. Brothers, 
 K. N. Kudin, V. N. Staroverov, T. Keith, R. Kobayashi, J. Normand, 
 K. Raghavachari, A. Rendell, J. C. Burant, S. S. Iyengar, J. Tomasi, 
 M. Cossi, N. Rega, J. M. Millam, M. Klene, J. E. Knox, J. B. Cross, 
 V. Bakken, C. Adamo, J. Jaramillo, R. Gomperts, R. E. Stratmann, 
 O. Yazyev, A. J. Austin, R. Cammi, C. Pomelli, J. W. Ochterski, 
 R. L. Martin, K. Morokuma, V. G. Zakrzewski, G. A. Voth, 
 P. Salvador, J. J. Dannenberg, S. Dapprich, A. D. Daniels, 
 O. Farkas, J. B. Foresman, J. V. Ortiz, J. Cioslowski, 
 and D. J. Fox, Gaussian, Inc., Wallingford CT, 2013.
 
 ******************************************
 Gaussian 09:  IA32W-G09RevD.01 24-Apr-2013
                13-Jan-2020 
 ******************************************
 %nprocshared=2
 Will use up to    2 processors via shared memory.
 %mem=1GB
 %chk=E:\Gaussian file\2-BrHAQ energy.chk
 ----------------------------------------------------------------------
 #p um062x/gen scrf=(solvent=acetonitrile) guess=save geom=connectivity
  empiricaldispersion=gd3
 ----------------------------------------------------------------------
 1/38=1,57=2/1;
 2/12=2,17=6,18=5,40=1/2;
 3/5=7,11=2,16=1,25=1,30=1,70=2201,72=2,74=-55,116=2,124=31/1,2,3;
 4//1;
 5/5=2,38=5,53=2/2;
 6/7=2,8=2,9=2,10=2,28=1/1;
 99/5=1,9=1/99;
 Leave Link    1 at Mon Jan 13 11:25:13 2020, MaxMem=   134217728 cpu:         0.0
 (Enter E:\Gaussian\G09W\l101.exe)
 --------------
 2-BrHAQ energy
 --------------
 Symbolic Z-matrix:
 Charge =  0 Multiplicity = 2
 C                    -5.06866   0.09018   0. 
 C                    -4.03102   1.00562   0.00001 
 C                    -2.69535   0.58469   0.00001 
 C                    -2.39667  -0.80954  -0.00001 
 C                    -3.47597  -1.72737  -0.00003 
 C                    -4.78289  -1.28505  -0.00003 
 H                    -6.09763   0.43056   0.00001 
 H                    -4.22541   2.07102   0.00002 
 H                    -3.30337  -2.7985   -0.00008 
 H                    -5.59165  -2.00678  -0.00005 
 C                    -1.03435  -1.2299    0.00001 
 C                    -1.6288    1.59945   0.00001 
 C                     0.03513  -0.28867   0. 
 C                    -0.24554   1.10327  -0.00001 
 C                     1.38196  -0.72363   0.00001 
 C                     0.81601   2.01736  -0.00002 
 C                     2.39188   0.21211  -0.00001 
 H                     1.60214  -1.78149   0.00002 
 C                     2.13157   1.59193  -0.00002 
 H                     0.58143   3.07452  -0.00002 
 H                     2.9456    2.30502  -0.00003 
 Br                    4.21583  -0.37985  0. 
 O                    -1.88364   2.81113   0.00003 
 O                    -0.66867  -2.52663   0.00003 
 H                    -1.43056  -3.11821   0.00015 
 
 NAtoms=     25 NQM=       25 NQMF=       0 NMMI=      0 NMMIF=      0
                NMic=       0 NMicF=      0.
                    Isotopes and Nuclear Properties:
 (Nuclear quadrupole moments (NQMom) in fm**2, nuclear magnetic moments (NMagM)
  in nuclear magnetons)

  Atom         1           2           3           4           5           6           7           8           9          10
 IAtWgt=          12          12          12          12          12          12           1           1           1           1
 AtmWgt=  12.0000000  12.0000000  12.0000000  12.0000000  12.0000000  12.0000000   1.0078250   1.0078250   1.0078250   1.0078250
 NucSpn=           0           0           0           0           0           0           1           1           1           1
 AtZEff=   0.0000000   0.0000000   0.0000000   0.0000000   0.0000000   0.0000000   0.0000000   0.0000000   0.0000000   0.0000000
 NQMom=    0.0000000   0.0000000   0.0000000   0.0000000   0.0000000   0.0000000   0.0000000   0.0000000   0.0000000   0.0000000
 NMagM=    0.0000000   0.0000000   0.0000000   0.0000000   0.0000000   0.0000000   2.7928460   2.7928460   2.7928460   2.7928460
 AtZNuc=   6.0000000   6.0000000   6.0000000   6.0000000   6.0000000   6.0000000   1.0000000   1.0000000   1.0000000   1.0000000

  Atom        11          12          13          14          15          16          17          18          19          20
 IAtWgt=          12          12          12          12          12          12          12           1          12           1
 AtmWgt=  12.0000000  12.0000000  12.0000000  12.0000000  12.0000000  12.0000000  12.0000000   1.0078250  12.0000000   1.0078250
 NucSpn=           0           0           0           0           0           0           0           1           0           1
 AtZEff=   0.0000000   0.0000000   0.0000000   0.0000000   0.0000000   0.0000000   0.0000000   0.0000000   0.0000000   0.0000000
 NQMom=    0.0000000   0.0000000   0.0000000   0.0000000   0.0000000   0.0000000   0.0000000   0.0000000   0.0000000   0.0000000
 NMagM=    0.0000000   0.0000000   0.0000000   0.0000000   0.0000000   0.0000000   0.0000000   2.7928460   0.0000000   2.7928460
 AtZNuc=   6.0000000   6.0000000   6.0000000   6.0000000   6.0000000   6.0000000   6.0000000   1.0000000   6.0000000   1.0000000

  Atom        21          22          23          24          25
 IAtWgt=           1          79          16          16           1
 AtmWgt=   1.0078250  78.9183361  15.9949146  15.9949146   1.0078250
 NucSpn=           1           3           0           0           1
 AtZEff=   0.0000000   0.0000000   0.0000000   0.0000000   0.0000000
 NQMom=    0.0000000  31.3000000   0.0000000   0.0000000   0.0000000
 NMagM=    2.7928460   2.1063990   0.0000000   0.0000000   2.7928460
 AtZNuc=   1.0000000  35.0000000   8.0000000   8.0000000   1.0000000
 Leave Link  101 at Mon Jan 13 11:25:14 2020, MaxMem=   134217728 cpu:         0.0
 (Enter E:\Gaussian\G09W\l202.exe)
                          Input orientation:                          
 ---------------------------------------------------------------------
 Center     Atomic      Atomic             Coordinates (Angstroms)
 Number     Number       Type             X           Y           Z
 ---------------------------------------------------------------------
      1          6           0       -5.068660    0.090181    0.000001
      2          6           0       -4.031023    1.005624    0.000013
      3          6           0       -2.695349    0.584694    0.000008
      4          6           0       -2.396670   -0.809539   -0.000007
      5          6           0       -3.475974   -1.727369   -0.000033
      6          6           0       -4.782894   -1.285051   -0.000027
      7          1           0       -6.097632    0.430558    0.000011
      8          1           0       -4.225405    2.071015    0.000022
      9          1           0       -3.303373   -2.798496   -0.000081
     10          1           0       -5.591646   -2.006785   -0.000050
     11          6           0       -1.034349   -1.229904    0.000010
     12          6           0       -1.628799    1.599446    0.000009
     13          6           0        0.035134   -0.288673    0.000002
     14          6           0       -0.245541    1.103273   -0.000006
     15          6           0        1.381959   -0.723634    0.000007
     16          6           0        0.816012    2.017355   -0.000017
     17          6           0        2.391883    0.212107   -0.000005
     18          1           0        1.602141   -1.781485    0.000020
     19          6           0        2.131571    1.591933   -0.000019
     20          1           0        0.581427    3.074516   -0.000023
     21          1           0        2.945604    2.305020   -0.000026
     22         35           0        4.215831   -0.379851   -0.000002
     23          8           0       -1.883636    2.811130    0.000025
     24          8           0       -0.668669   -2.526633    0.000027
     25          1           0       -1.430559   -3.118213    0.000150
 ---------------------------------------------------------------------
                    Distance matrix (angstroms):
                    1          2          3          4          5
     1  C    0.000000
     2  C    1.383736   0.000000
     3  C    2.424283   1.400431   0.000000
     4  C    2.819402   2.442525   1.425866   0.000000
     5  C    2.416637   2.788786   2.440289   1.416795   0.000000
     6  C    1.404609   2.410913   2.802462   2.433141   1.379741
     7  H    1.083808   2.145128   3.405773   3.903199   3.395547
     8  H    2.152854   1.082978   2.133125   3.412017   3.871610
     9  H    3.385365   3.873087   3.437393   2.185877   1.084944
    10  H    2.161199   3.392662   3.886425   3.411930   2.134043
    11  C    4.244796   3.738668   2.460018   1.425702   2.491787
    12  C    3.756398   2.474531   1.472158   2.528406   3.805227
    13  C    5.117836   4.267181   2.866759   2.486960   3.794433
    14  C    4.928370   3.786741   2.504093   2.878577   4.295140
    15  C    6.501752   5.682491   4.282075   3.779605   4.960544
    16  C    6.192202   4.951500   3.792384   4.279329   5.695972
    17  C    7.461539   6.471738   5.100858   4.896325   6.180074
    18  H    6.928399   6.284943   4.905836   4.115236   5.078403
    19  C    7.355174   6.190422   4.930891   5.125625   6.516312
    20  H    6.389815   5.055196   4.115395   4.894379   6.286541
    21  H    8.314682   7.096602   5.897446   6.183880   7.582666
    22  Br   9.296381   8.362424   6.978163   6.626447   7.808948
    23  O    4.189026   2.805552   2.369788   3.656836   4.809731
    24  O    5.119339   4.876706   3.713191   2.436062   2.918867
    25  H    4.850729   4.875289   3.912955   2.502668   2.473493
                    6          7          8          9         10
     6  C    0.000000
     7  H    2.161446   0.000000
     8  H    3.402054   2.489243   0.000000
     9  H    2.116482   4.270208   4.956035   0.000000
    10  H    1.083965   2.489310   4.300589   2.421363   0.000000
    11  C    3.748951   5.328599   4.591177   2.758433   4.623040
    12  C    4.274183   4.619174   2.639079   4.705963   5.358083
    13  C    4.919976   6.174797   4.870351   4.176702   5.883244
    14  C    5.127540   5.890629   4.095832   4.957231   6.184925
    15  C    6.190364   7.568120   6.265189   5.124196   7.090673
    16  C    6.500280   7.093405   5.041703   6.337330   7.566491
    17  C    7.329318   8.492325   6.873430   6.442024   8.286146
    18  H    6.404305   8.011220   6.985846   5.009828   7.197314
    19  C    7.489116   8.310751   6.375003   6.986736   8.520496
    20  H    6.912435   7.183338   4.910463   7.041587   7.995402
    21  H    8.521637   9.235460   7.174826   8.068184   9.564324
    22  Br   9.044138  10.345254   8.789836   7.898625   9.941505
    23  O    5.018406   4.839926   2.455942   5.786498   6.079609
    24  O    4.297485   6.182121   5.812808   2.648693   4.950348
    25  H    3.820816   5.863049   5.894001   1.899908   4.306961
                   11         12         13         14         15
    11  C    0.000000
    12  C    2.891123   0.000000
    13  C    1.424679   2.516678   0.000000
    14  C    2.462911   1.469554   1.419962   0.000000
    15  C    2.468776   3.802810   1.415319   2.446701   0.000000
    16  C    3.737449   2.480272   2.434653   1.400871   2.798806
    17  C    3.717319   4.253304   2.409366   2.783915   1.376793
    18  H    2.693570   4.676502   2.164255   3.425749   1.080522
    19  C    4.240968   3.760378   2.816332   2.426819   2.433879
    20  H    4.597691   2.657241   3.407268   2.137680   3.881597
    21  H    5.323130   4.628498   3.898471   3.409927   3.408479
    22  Br   5.318551   6.170682   4.181691   4.701436   2.854648
    23  O    4.129315   1.238192   3.645608   2.366460   4.812345
    24  O    1.347304   4.236317   2.346019   3.654484   2.730546
    25  H    1.929428   4.721822   3.186621   4.384656   3.693815
                   16         17         18         19         20
    16  C    0.000000
    17  C    2.396308   0.000000
    18  H    3.879328   2.144318   0.000000
    19  C    1.382635   1.404166   3.414710   0.000000
    20  H    1.082876   3.386907   4.962117   2.144994   0.000000
    21  H    2.148933   2.164923   4.301676   1.082194   2.486254
    22  Br   4.159972   1.917603   2.965797   2.869159   5.014134
    23  O    2.813926   5.003497   5.765653   4.196228   2.479094
    24  O    4.780387   4.107028   2.389942   4.980354   5.738955
    25  H    5.605456   5.069723   3.314229   5.905442   6.511373
                   21         22         23         24         25
    21  H    0.000000
    22  Br   2.970187   0.000000
    23  O    4.855688   6.883739   0.000000
    24  O    6.033891   5.335449   5.474291   0.000000
    25  H    6.968663   6.275376   5.946628   0.964595   0.000000
 Stoichiometry    C14H8BrO2(2)
 Framework group  C1[X(C14H8BrO2)]
 Deg. of freedom    69
 Full point group                 C1      NOp   1
 Largest Abelian subgroup         C1      NOp   1
 Largest concise Abelian subgroup C1      NOp   1
                         Standard orientation:                         
 ---------------------------------------------------------------------
 Center     Atomic      Atomic             Coordinates (Angstroms)
 Number     Number       Type             X           Y           Z
 ---------------------------------------------------------------------
      1          6           0       -5.068660    0.090181    0.000001
      2          6           0       -4.031023    1.005624    0.000013
      3          6           0       -2.695349    0.584694    0.000008
      4          6           0       -2.396670   -0.809539   -0.000007
      5          6           0       -3.475974   -1.727369   -0.000033
      6          6           0       -4.782894   -1.285051   -0.000027
      7          1           0       -6.097632    0.430558    0.000011
      8          1           0       -4.225405    2.071015    0.000022
      9          1           0       -3.303373   -2.798496   -0.000081
     10          1           0       -5.591646   -2.006785   -0.000050
     11          6           0       -1.034349   -1.229904    0.000010
     12          6           0       -1.628799    1.599446    0.000009
     13          6           0        0.035134   -0.288673    0.000002
     14          6           0       -0.245541    1.103273   -0.000006
     15          6           0        1.381959   -0.723634    0.000007
     16          6           0        0.816012    2.017355   -0.000017
     17          6           0        2.391883    0.212107   -0.000005
     18          1           0        1.602141   -1.781485    0.000020
     19          6           0        2.131571    1.591933   -0.000019
     20          1           0        0.581427    3.074516   -0.000023
     21          1           0        2.945604    2.305020   -0.000026
     22         35           0        4.215831   -0.379851   -0.000002
     23          8           0       -1.883636    2.811130    0.000025
     24          8           0       -0.668669   -2.526633    0.000027
     25          1           0       -1.430559   -3.118213    0.000150
 ---------------------------------------------------------------------
 Rotational constants (GHZ):      0.9830221      0.1774932      0.1503468
 Leave Link  202 at Mon Jan 13 11:25:14 2020, MaxMem=   134217728 cpu:         0.0
 (Enter E:\Gaussian\G09W\l301.exe)
 General basis read from cards:  (5D, 7F)
 Centers:       7      8      9     10     18     20     21     25
 S 3 1.00
     Exponent=  3.4061341000D+01 Coefficients=  6.0251978000D-03
     Exponent=  5.1235746000D+00 Coefficients=  4.5021094000D-02
     Exponent=  1.1646626000D+00 Coefficients=  2.0189726000D-01
 S 1 1.00
     Exponent=  3.2723041000D-01 Coefficients=  1.0000000000D+00
 S 1 1.00
     Exponent=  1.0307241000D-01 Coefficients=  1.0000000000D+00
 P 1 1.00
     Exponent=  8.0000000000D-01 Coefficients=  1.0000000000D+00
 ****
 Centers:       1      2      3      4      5      6     11     12     13     14
 Centers:      15     16     17     19
 S 6 1.00
     Exponent=  1.3575349682D+04 Coefficients=  2.2245814352D-04
     Exponent=  2.0352333680D+03 Coefficients=  1.7232738252D-03
     Exponent=  4.6322562359D+02 Coefficients=  8.9255715314D-03
     Exponent=  1.3120019598D+02 Coefficients=  3.5727984502D-02
     Exponent=  4.2853015891D+01 Coefficients=  1.1076259931D-01
     Exponent=  1.5584185766D+01 Coefficients=  2.4295627626D-01
 S 2 1.00
     Exponent=  6.2067138508D+00 Coefficients=  4.1440263448D-01
     Exponent=  2.5764896527D+00 Coefficients=  2.3744968655D-01
 S 1 1.00
     Exponent=  5.7696339419D-01 Coefficients=  1.0000000000D+00
 S 1 1.00
     Exponent=  2.2972831358D-01 Coefficients=  1.0000000000D+00
 S 1 1.00
     Exponent=  9.5164440028D-02 Coefficients=  1.0000000000D+00
 P 4 1.00
     Exponent=  3.4697232244D+01 Coefficients=  5.3333657805D-03
     Exponent=  7.9582622826D+00 Coefficients=  3.5864109092D-02
     Exponent=  2.3780826883D+00 Coefficients=  1.4215873329D-01
     Exponent=  8.1433208183D-01 Coefficients=  3.4270471845D-01
 P 1 1.00
     Exponent=  2.8887547253D-01 Coefficients=  4.6445822433D-01
 P 1 1.00
     Exponent=  1.0056823671D-01 Coefficients=  2.4955789874D-01
 D 1 1.00
     Exponent=  1.0970000000D+00 Coefficients=  1.0000000000D+00
 D 1 1.00
     Exponent=  3.1800000000D-01 Coefficients=  1.0000000000D+00
 F 1 1.00
     Exponent=  7.6100000000D-01 Coefficients=  1.0000000000D+00
 ****
 Centers:      23     24
 S 6 1.00
     Exponent=  2.7032382631D+04 Coefficients=  2.1726302465D-04
     Exponent=  4.0523871392D+03 Coefficients=  1.6838662199D-03
     Exponent=  9.2232722710D+02 Coefficients=  8.7395616265D-03
     Exponent=  2.6124070989D+02 Coefficients=  3.5239968808D-02
     Exponent=  8.5354641351D+01 Coefficients=  1.1153519115D-01
     Exponent=  3.1035035245D+01 Coefficients=  2.5588953961D-01
 S 2 1.00
     Exponent=  1.2260860728D+01 Coefficients=  3.9768730901D-01
     Exponent=  4.9987076005D+00 Coefficients=  2.4627849430D-01
 S 1 1.00
     Exponent=  1.1703108158D+00 Coefficients=  1.0000000000D+00
 S 1 1.00
     Exponent=  4.6474740994D-01 Coefficients=  1.0000000000D+00
 S 1 1.00
     Exponent=  1.8504536357D-01 Coefficients=  1.0000000000D+00
 P 4 1.00
     Exponent=  6.3274954801D+01 Coefficients=  6.0685103418D-03
     Exponent=  1.4627049379D+01 Coefficients=  4.1912575824D-02
     Exponent=  4.4501223456D+00 Coefficients=  1.6153841088D-01
     Exponent=  1.5275799647D+00 Coefficients=  3.5706951311D-01
 P 1 1.00
     Exponent=  5.2935117943D-01 Coefficients=  4.4794207502D-01
 P 1 1.00
     Exponent=  1.7478421270D-01 Coefficients=  2.4446069663D-01
 D 1 1.00
     Exponent=  2.3140000000D+00 Coefficients=  1.0000000000D+00
 D 1 1.00
     Exponent=  6.4500000000D-01 Coefficients=  1.0000000000D+00
 F 1 1.00
     Exponent=  1.4280000000D+00 Coefficients=  1.0000000000D+00
 ****
 Centers:      22
 S 8 1.00
     Exponent=  5.6507325256D+05 Coefficients=  2.3660314690D-04
     Exponent=  8.4701723179D+04 Coefficients=  1.8348332508D-03
     Exponent=  1.9276271900D+04 Coefficients=  9.5465849860D-03
     Exponent=  5.4564284576D+03 Coefficients=  3.8877142153D-02
     Exponent=  1.7769503500D+03 Coefficients=  1.2718314231D-01
     Exponent=  6.3919398276D+02 Coefficients=  3.0437662191D-01
     Exponent=  2.4878823961D+02 Coefficients=  4.4490940497D-01
     Exponent=  9.8678305494D+01 Coefficients=  2.4381643058D-01
 S 4 1.00
     Exponent=  6.0607824568D+02 Coefficients= -2.6527158709D-02
     Exponent=  1.8845598484D+02 Coefficients= -1.2484584809D-01
     Exponent=  3.1497144506D+01 Coefficients=  5.6468683559D-01
     Exponent=  1.3736008320D+01 Coefficients=  5.5555268564D-01
 S 2 1.00
     Exponent=  2.1203212766D+01 Coefficients= -2.4940920493D-01
     Exponent=  3.7616420178D+00 Coefficients=  7.1213119743D-01
 S 1 1.00
     Exponent=  1.7735933962D+00 Coefficients=  1.0000000000D+00
 S 1 1.00
     Exponent=  4.5197413664D-01 Coefficients=  1.0000000000D+00
 S 1 1.00
     Exponent=  1.6613377099D-01 Coefficients=  1.0000000000D+00
 P 6 1.00
     Exponent=  3.0196955723D+03 Coefficients=  2.4971049798D-03
     Exponent=  7.1535481126D+02 Coefficients=  2.0419267596D-02
     Exponent=  2.2998328751D+02 Coefficients=  9.6897148309D-02
     Exponent=  8.6167844615D+01 Coefficients=  2.8053901252D-01
     Exponent=  3.4667870802D+01 Coefficients=  4.4606390473D-01
     Exponent=  1.4113870307D+01 Coefficients=  2.4410073923D-01
 P 4 1.00
     Exponent=  5.7085653082D+01 Coefficients= -2.1855950710D-02
     Exponent=  8.8193845840D+00 Coefficients=  3.2707075320D-01
     Exponent=  3.9340302872D+00 Coefficients=  5.7855229520D-01
     Exponent=  1.7998830384D+00 Coefficients=  3.3570987698D-01
 P 1 1.00
     Exponent=  6.6899410512D-01 Coefficients=  1.0000000000D+00
 P 1 1.00
     Exponent=  2.7136238231D-01 Coefficients=  1.0000000000D+00
 P 1 1.00
     Exponent=  1.0083790243D-01 Coefficients=  1.0000000000D+00
 D 5 1.00
     Exponent=  1.6885370257D+02 Coefficients=  8.9663981988D-03
     Exponent=  4.9977949919D+01 Coefficients=  6.2062059316D-02
     Exponent=  1.8274913338D+01 Coefficients=  2.1474732384D-01
     Exponent=  7.2455694631D+00 Coefficients=  4.0335336746D-01
     Exponent=  2.8562315025D+00 Coefficients=  4.2208813080D-01
 D 1 1.00
     Exponent=  1.0459621144D+00 Coefficients=  1.7874813267D-01
 D 1 1.00
     Exponent=  5.6865655000D-01 Coefficients=  1.0000000000D+00
 D 1 1.00
     Exponent=  2.2031490000D-01 Coefficients=  1.0000000000D+00
 F 1 1.00
     Exponent=  5.7083312000D-01 Coefficients=  1.0000000000D+00
 ****
 Ernie: Thresh=  0.10000D-02 Tol=  0.10000D-05 Strict=F.
 There are   679 symmetry adapted cartesian basis functions of A   symmetry.
 There are   592 symmetry adapted basis functions of A   symmetry.
   592 basis functions,   994 primitive gaussians,   679 cartesian basis functions
    72 alpha electrons       71 beta electrons
       nuclear repulsion energy      1393.0868326739 Hartrees.
 IExCor= 4336 DFT=T Ex+Corr=M062X ExCW=0 ScaHFX=  0.540000
 ScaDFX=  1.000000  1.000000  1.000000  1.000000 ScalE2=  1.000000  1.000000
 IRadAn=      0 IRanWt=     -1 IRanGd=            0 ICorTp=0 IEmpDi=131
 NAtoms=   25 NActive=   25 NUniq=   25 SFac= 1.00D+00 NAtFMM=   60 NAOKFM=F Big=F
 Integral buffers will be    262144 words long.
 Raffenetti 2 integral format.
 Two-electron integral symmetry is turned on.
 R6Disp:  Grimme-D3 Dispersion energy=       -0.0011974492 Hartrees.
 Nuclear repulsion after empirical dispersion term =     1393.0856352247 Hartrees.
 ------------------------------------------------------------------------------
 Polarizable Continuum Model (PCM)
 =================================
 Model                : PCM (using non-symmetric T matrix).
 Atomic radii         : UFF (Universal Force Field).
 Polarization charges : Total charges.
 Charge compensation  : None.
 Solution method      : On-the-fly selection.
 Cavity type          : Scaled VdW (van der Waals Surface) (Alpha=1.100).
 Cavity algorithm     : GePol (No added spheres)
                        Default sphere list used, NSphG=   25.
                        Lebedev-Laikov grids with approx.  5.0 points / Ang**2.
                        Smoothing algorithm: Karplus/York (Gamma=1.0000).
                        Polarization charges: spherical gaussians, with
                                              point-specific exponents (IZeta= 3).
                        Self-potential: point-specific (ISelfS= 7).
                        Self-field    : sphere-specific E.n sum rule (ISelfD= 2).
 Solvent              : Acetonitrile, Eps=  35.688000 Eps(inf)=   1.806874
 ------------------------------------------------------------------------------
 GePol: Number of generator spheres                  =      25
 GePol: Total number of spheres                      =      25
 GePol: Number of exposed spheres                    =      25 (100.00%)
 GePol: Number of points                             =    2193
 GePol: Average weight of points                     =       0.13
 GePol: Minimum weight of points                     =   0.43D-10
 GePol: Maximum weight of points                     =    0.20577
 GePol: Number of points with low weight             =     139
 GePol: Fraction of low-weight points (<1% of avg)   =       6.34%
 GePol: Cavity surface area                          =    281.127 Ang**2
 GePol: Cavity volume                                =    308.172 Ang**3
 Leave Link  301 at Mon Jan 13 11:25:16 2020, MaxMem=   134217728 cpu:         1.0
 (Enter E:\Gaussian\G09W\l302.exe)
 NPDir=0 NMtPBC=     1 NCelOv=     1 NCel=       1 NClECP=     1 NCelD=      1
         NCelK=      1 NCelE2=     1 NClLst=     1 CellRange=     0.0.
 One-electron integrals computed using PRISM.
 NBasis=   592 RedAO= T EigKep=  5.77D-06  NBF=   592
 NBsUse=   592 1.00D-06 EigRej= -1.00D+00 NBFU=   592
 Precomputing XC quadrature grid using
 IXCGrd= 4 IRadAn=           0 IRanWt=          -1 IRanGd=           0 AccXCQ= 0.00D+00.
 Generated NRdTot=       0 NPtTot=           0 NUsed=           0 NTot=          16
 NSgBfM=   663   663   663   663   663 MxSgAt=    25 MxSgA2=    25.
 Leave Link  302 at Mon Jan 13 11:25:22 2020, MaxMem=   134217728 cpu:         5.0
 (Enter E:\Gaussian\G09W\l303.exe)
 DipDrv:  MaxL=1.
 Leave Link  303 at Mon Jan 13 11:25:23 2020, MaxMem=   134217728 cpu:         1.0
 (Enter E:\Gaussian\G09W\l401.exe)
 ExpMin= 9.52D-02 ExpMax= 5.65D+05 ExpMxC= 5.46D+03 IAcc=2 IRadAn=         4 AccDes= 0.00D+00
 Harris functional with IExCor= 1009 and IRadAn=       4 diagonalized for initial guess.
 HarFok:  IExCor= 1009 AccDes= 0.00D+00 IRadAn=         4 IDoV= 1 UseB2=F ITyADJ=14
 ICtDFT=  3500011 ScaDFX=  1.000000  1.000000  1.000000  1.000000
 FoFCou: FMM=F IPFlag=           0 FMFlag=      100000 FMFlg1=           0
         NFxFlg=           0 DoJE=T BraDBF=F KetDBF=T FulRan=T
         wScrn=  0.000000 ICntrl=     500 IOpCl=  0 I1Cent=   200000004 NGrid=           0
         NMat0=    1 NMatS0=      1 NMatT0=    0 NMatD0=    1 NMtDS0=    0 NMtDT0=    0
 Petite list used in FoFCou.
 Harris En= -3262.15725678707    
 JPrj=0 DoOrth=F DoCkMO=F.
 Initial guess <Sx>= 0.0000 <Sy>= 0.0000 <Sz>= 0.5000 <S**2>= 0.7500 S= 0.5000
 Leave Link  401 at Mon Jan 13 11:26:06 2020, MaxMem=   134217728 cpu:        42.0
 (Enter E:\Gaussian\G09W\l502.exe)
 UHF open shell SCF:
 Using DIIS extrapolation, IDIIS=  1040.
 Integral symmetry usage will be decided dynamically.
 IVT=     1409803 IEndB=     1409803 NGot=   134217728 MDV=   133286286
 LenX=   133286286 LenY=   132824566
 Requested convergence on RMS density matrix=1.00D-08 within 128 cycles.
 Requested convergence on MAX density matrix=1.00D-06.
 Requested convergence on             energy=1.00D-06.
 No special actions if energy rises.
 Fock matrices will be formed incrementally for  20 cycles.

 Cycle   1  Pass 1  IDiag  1:
 FoFJK:  IHMeth= 1 ICntrl=       0 DoSepK=F KAlg= 0 I1Cent=   0 FoldK=F
 IRaf= 830000000 NMat=   1 IRICut=       1 DoRegI=T DoRafI=F ISym2E= 0.
 FoFCou: FMM=F IPFlag=           0 FMFlag=      100000 FMFlg1=           0
         NFxFlg=           0 DoJE=F BraDBF=F KetDBF=F FulRan=T
         wScrn=  0.000000 ICntrl=       0 IOpCl=  1 I1Cent=           0 NGrid=           0
         NMat0=    1 NMatS0=      1 NMatT0=    0 NMatD0=    1 NMtDS0=    0 NMtDT0=    0
 Symmetry not used in FoFCou.
 Inv3:  Mode=1 IEnd=    14427747.
 Iteration    1 A*A^-1 deviation from unit magnitude is 2.33D-15 for   1052.
 Iteration    1 A*A^-1 deviation from orthogonality  is 1.96D-15 for   1771   1199.
 Iteration    1 A^-1*A deviation from unit magnitude is 2.89D-15 for    341.
 Iteration    1 A^-1*A deviation from orthogonality  is 6.56D-14 for   1606   1572.
 E= -3262.56607952462    
 DIIS: error= 2.63D-02 at cycle   1 NSaved=   1.
 NSaved= 1 IEnMin= 1 EnMin= -3262.56607952462     IErMin= 1 ErrMin= 2.63D-02
 ErrMax= 2.63D-02  0.00D+00 EMaxC= 1.00D-01 BMatC= 2.69D+00 BMatP= 2.69D+00
 IDIUse=3 WtCom= 7.37D-01 WtEn= 2.63D-01
 Coeff-Com:  0.100D+01
 Coeff-En:   0.100D+01
 Coeff:      0.100D+01
 Gap=     0.196 Goal=   None    Shift=    0.000
 Gap=     0.239 Goal=   None    Shift=    0.000
 GapD=    0.196 DampG=1.000 DampE=0.500 DampFc=0.5000 IDamp=-1.
 Damping current iteration by 5.00D-01
 RMSDP=7.99D-03 MaxDP=6.21D-01              OVMax= 2.20D-01

 Cycle   2  Pass 1  IDiag  1:
 RMSU=  3.99D-03    CP:  1.02D+00
 E= -3262.75125567373     Delta-E=       -0.185176149114 Rises=F Damp=T
 DIIS: error= 7.05D-03 at cycle   2 NSaved=   2.
 NSaved= 2 IEnMin= 2 EnMin= -3262.75125567373     IErMin= 2 ErrMin= 7.05D-03
 ErrMax= 7.05D-03  0.00D+00 EMaxC= 1.00D-01 BMatC= 2.40D-01 BMatP= 2.69D+00
 IDIUse=3 WtCom= 9.29D-01 WtEn= 7.05D-02
 Coeff-Com: -0.142D+00 0.114D+01
 Coeff-En:   0.000D+00 0.100D+01
 Coeff:     -0.132D+00 0.113D+01
 Gap=     0.178 Goal=   None    Shift=    0.000
 Gap=     0.265 Goal=   None    Shift=    0.000
 RMSDP=2.78D-03 MaxDP=2.27D-01 DE=-1.85D-01 OVMax= 1.21D-01

 Cycle   3  Pass 1  IDiag  1:
 RMSU=  1.79D-03    CP:  9.76D-01  4.79D-01
 E= -3262.91432065371     Delta-E=       -0.163064979976 Rises=F Damp=F
 DIIS: error= 8.06D-03 at cycle   3 NSaved=   3.
 NSaved= 3 IEnMin= 3 EnMin= -3262.91432065371     IErMin= 2 ErrMin= 7.05D-03
 ErrMax= 8.06D-03  0.00D+00 EMaxC= 1.00D-01 BMatC= 1.37D-01 BMatP= 2.40D-01
 IDIUse=3 WtCom= 9.19D-01 WtEn= 8.06D-02
 Coeff-Com: -0.142D+00 0.538D+00 0.604D+00
 Coeff-En:   0.000D+00 0.000D+00 0.100D+01
 Coeff:     -0.130D+00 0.495D+00 0.635D+00
 Gap=     0.178 Goal=   None    Shift=    0.000
 Gap=     0.201 Goal=   None    Shift=    0.000
 RMSDP=8.10D-04 MaxDP=7.80D-02 DE=-1.63D-01 OVMax= 6.19D-02

 Cycle   4  Pass 1  IDiag  1:
 RMSU=  4.28D-04    CP:  9.84D-01  6.42D-01  8.85D-01
 E= -3262.93726450028     Delta-E=       -0.022943846575 Rises=F Damp=F
 DIIS: error= 3.49D-03 at cycle   4 NSaved=   4.
 NSaved= 4 IEnMin= 4 EnMin= -3262.93726450028     IErMin= 4 ErrMin= 3.49D-03
 ErrMax= 3.49D-03  0.00D+00 EMaxC= 1.00D-01 BMatC= 2.36D-02 BMatP= 1.37D-01
 IDIUse=3 WtCom= 9.65D-01 WtEn= 3.49D-02
 Coeff-Com: -0.435D-01 0.109D+00 0.338D+00 0.596D+00
 Coeff-En:   0.000D+00 0.000D+00 0.131D+00 0.869D+00
 Coeff:     -0.420D-01 0.105D+00 0.331D+00 0.606D+00
 Gap=     0.176 Goal=   None    Shift=    0.000
 Gap=     0.206 Goal=   None    Shift=    0.000
 RMSDP=3.70D-04 MaxDP=3.47D-02 DE=-2.29D-02 OVMax= 1.67D-02

 Cycle   5  Pass 1  IDiag  1:
 RMSU=  1.12D-04    CP:  9.81D-01  5.67D-01  9.41D-01  6.56D-01
 E= -3262.94213122247     Delta-E=       -0.004866722188 Rises=F Damp=F
 DIIS: error= 6.41D-04 at cycle   5 NSaved=   5.
 NSaved= 5 IEnMin= 5 EnMin= -3262.94213122247     IErMin= 5 ErrMin= 6.41D-04
 ErrMax= 6.41D-04  0.00D+00 EMaxC= 1.00D-01 BMatC= 8.57D-04 BMatP= 2.36D-02
 IDIUse=3 WtCom= 9.94D-01 WtEn= 6.41D-03
 Coeff-Com: -0.802D-02 0.129D-01 0.101D+00 0.258D+00 0.635D+00
 Coeff-En:   0.000D+00 0.000D+00 0.000D+00 0.000D+00 0.100D+01
 Coeff:     -0.797D-02 0.128D-01 0.101D+00 0.257D+00 0.638D+00
 Gap=     0.176 Goal=   None    Shift=    0.000
 Gap=     0.208 Goal=   None    Shift=    0.000
 RMSDP=4.10D-05 MaxDP=2.35D-03 DE=-4.87D-03 OVMax= 5.37D-03

 Cycle   6  Pass 1  IDiag  1:
 RMSU=  3.86D-05    CP:  9.81D-01  5.67D-01  9.41D-01  6.88D-01  9.77D-01
 E= -3262.94240319322     Delta-E=       -0.000271970748 Rises=F Damp=F
 DIIS: error= 2.81D-04 at cycle   6 NSaved=   6.
 NSaved= 6 IEnMin= 6 EnMin= -3262.94240319322     IErMin= 6 ErrMin= 2.81D-04
 ErrMax= 2.81D-04  0.00D+00 EMaxC= 1.00D-01 BMatC= 1.06D-04 BMatP= 8.57D-04
 IDIUse=3 WtCom= 9.97D-01 WtEn= 2.81D-03
 Coeff-Com:  0.440D-02-0.121D-01-0.168D-01-0.112D-01 0.175D+00 0.861D+00
 Coeff-En:   0.000D+00 0.000D+00 0.000D+00 0.000D+00 0.000D+00 0.100D+01
 Coeff:      0.439D-02-0.121D-01-0.168D-01-0.111D-01 0.174D+00 0.862D+00
 Gap=     0.177 Goal=   None    Shift=    0.000
 Gap=     0.208 Goal=   None    Shift=    0.000
 RMSDP=5.76D-05 MaxDP=4.10D-03 DE=-2.72D-04 OVMax= 7.83D-03

 Cycle   7  Pass 1  IDiag  1:
 RMSU=  2.01D-05    CP:  9.80D-01  5.55D-01  9.46D-01  6.89D-01  1.11D+00
                    CP:  1.30D+00
 E= -3262.94249352386     Delta-E=       -0.000090330645 Rises=F Damp=F
 DIIS: error= 2.50D-04 at cycle   7 NSaved=   7.
 NSaved= 7 IEnMin= 7 EnMin= -3262.94249352386     IErMin= 7 ErrMin= 2.50D-04
 ErrMax= 2.50D-04  0.00D+00 EMaxC= 1.00D-01 BMatC= 3.52D-05 BMatP= 1.06D-04
 IDIUse=3 WtCom= 9.97D-01 WtEn= 2.50D-03
 Coeff-Com:  0.303D-02-0.586D-02-0.334D-01-0.924D-01-0.182D+00 0.172D+00
 Coeff-Com:  0.114D+01
 Coeff-En:   0.000D+00 0.000D+00 0.000D+00 0.000D+00 0.000D+00 0.000D+00
 Coeff-En:   0.100D+01
 Coeff:      0.302D-02-0.585D-02-0.333D-01-0.921D-01-0.181D+00 0.172D+00
 Coeff:      0.114D+01
 Gap=     0.178 Goal=   None    Shift=    0.000
 Gap=     0.209 Goal=   None    Shift=    0.000
 RMSDP=4.36D-05 MaxDP=2.58D-03 DE=-9.03D-05 OVMax= 6.21D-03

 Cycle   8  Pass 1  IDiag  1:
 RMSU=  9.84D-06    CP:  9.80D-01  5.46D-01  9.50D-01  6.85D-01  1.25D+00
                    CP:  1.75D+00  1.48D+00
 E= -3262.94254184812     Delta-E=       -0.000048324259 Rises=F Damp=F
 DIIS: error= 1.07D-04 at cycle   8 NSaved=   8.
 NSaved= 8 IEnMin= 8 EnMin= -3262.94254184812     IErMin= 8 ErrMin= 1.07D-04
 ErrMax= 1.07D-04  0.00D+00 EMaxC= 1.00D-01 BMatC= 1.06D-05 BMatP= 3.52D-05
 IDIUse=3 WtCom= 9.99D-01 WtEn= 1.07D-03
 Coeff-Com:  0.339D-03 0.275D-03-0.109D-01-0.413D-01-0.122D+00-0.117D+00
 Coeff-Com:  0.506D+00 0.785D+00
 Coeff-En:   0.000D+00 0.000D+00 0.000D+00 0.000D+00 0.000D+00 0.000D+00
 Coeff-En:   0.000D+00 0.100D+01
 Coeff:      0.338D-03 0.275D-03-0.109D-01-0.412D-01-0.121D+00-0.117D+00
 Coeff:      0.505D+00 0.785D+00
 Gap=     0.178 Goal=   None    Shift=    0.000
 Gap=     0.209 Goal=   None    Shift=    0.000
 RMSDP=1.54D-05 MaxDP=1.04D-03 DE=-4.83D-05 OVMax= 3.31D-03

 Cycle   9  Pass 1  IDiag  1:
 RMSU=  4.36D-06    CP:  9.80D-01  5.44D-01  9.51D-01  6.80D-01  1.30D+00
                    CP:  1.88D+00  1.78D+00  1.32D+00
 E= -3262.94255183096     Delta-E=       -0.000009982838 Rises=F Damp=F
 DIIS: error= 5.00D-05 at cycle   9 NSaved=   9.
 NSaved= 9 IEnMin= 9 EnMin= -3262.94255183096     IErMin= 9 ErrMin= 5.00D-05
 ErrMax= 5.00D-05  0.00D+00 EMaxC= 1.00D-01 BMatC= 2.00D-06 BMatP= 1.06D-05
 IDIUse=1 WtCom= 1.00D+00 WtEn= 0.00D+00
 Coeff-Com: -0.588D-03 0.144D-02 0.557D-02 0.117D-01 0.121D-01-0.774D-01
 Coeff-Com: -0.155D+00 0.241D+00 0.961D+00
 Coeff:     -0.588D-03 0.144D-02 0.557D-02 0.117D-01 0.121D-01-0.774D-01
 Coeff:     -0.155D+00 0.241D+00 0.961D+00
 Gap=     0.178 Goal=   None    Shift=    0.000
 Gap=     0.209 Goal=   None    Shift=    0.000
 RMSDP=5.94D-06 MaxDP=2.98D-04 DE=-9.98D-06 OVMax= 1.50D-03

 Cycle  10  Pass 1  IDiag  1:
 RMSU=  2.28D-06    CP:  9.80D-01  5.43D-01  9.52D-01  6.78D-01  1.31D+00
                    CP:  1.94D+00  1.90D+00  1.60D+00  1.48D+00
 E= -3262.94255430375     Delta-E=       -0.000002472791 Rises=F Damp=F
 DIIS: error= 2.26D-05 at cycle  10 NSaved=  10.
 NSaved=10 IEnMin=10 EnMin= -3262.94255430375     IErMin=10 ErrMin= 2.26D-05
 ErrMax= 2.26D-05  0.00D+00 EMaxC= 1.00D-01 BMatC= 4.37D-07 BMatP= 2.00D-06
 IDIUse=1 WtCom= 1.00D+00 WtEn= 0.00D+00
 Coeff-Com: -0.313D-03 0.566D-03 0.415D-02 0.116D-01 0.228D-01-0.107D-01
 Coeff-Com: -0.139D+00-0.440D-01 0.295D+00 0.860D+00
 Coeff:     -0.313D-03 0.566D-03 0.415D-02 0.116D-01 0.228D-01-0.107D-01
 Coeff:     -0.139D+00-0.440D-01 0.295D+00 0.860D+00
 Gap=     0.178 Goal=   None    Shift=    0.000
 Gap=     0.209 Goal=   None    Shift=    0.000
 RMSDP=3.32D-06 MaxDP=2.25D-04 DE=-2.47D-06 OVMax= 5.82D-04

 Cycle  11  Pass 1  IDiag  1:
 RMSU=  1.07D-06    CP:  9.80D-01  5.43D-01  9.52D-01  6.77D-01  1.31D+00
                    CP:  1.96D+00  1.95D+00  1.71D+00  1.70D+00  1.31D+00
 E= -3262.94255482083     Delta-E=       -0.000000517078 Rises=F Damp=F
 DIIS: error= 1.30D-05 at cycle  11 NSaved=  11.
 NSaved=11 IEnMin=11 EnMin= -3262.94255482083     IErMin=11 ErrMin= 1.30D-05
 ErrMax= 1.30D-05  0.00D+00 EMaxC= 1.00D-01 BMatC= 1.26D-07 BMatP= 4.37D-07
 IDIUse=1 WtCom= 1.00D+00 WtEn= 0.00D+00
 Coeff-Com:  0.106D-03-0.310D-03-0.500D-03-0.206D-03 0.350D-02 0.222D-01
 Coeff-Com:  0.384D-02-0.759D-01-0.205D+00 0.254D+00 0.998D+00
 Coeff:      0.106D-03-0.310D-03-0.500D-03-0.206D-03 0.350D-02 0.222D-01
 Coeff:      0.384D-02-0.759D-01-0.205D+00 0.254D+00 0.998D+00
 Gap=     0.178 Goal=   None    Shift=    0.000
 Gap=     0.209 Goal=   None    Shift=    0.000
 RMSDP=1.46D-06 MaxDP=6.27D-05 DE=-5.17D-07 OVMax= 3.55D-04

 Cycle  12  Pass 1  IDiag  1:
 RMSU=  6.27D-07    CP:  9.80D-01  5.43D-01  9.52D-01  6.77D-01  1.31D+00
                    CP:  1.96D+00  1.96D+00  1.75D+00  1.83D+00  1.66D+00
                    CP:  1.45D+00
 E= -3262.94255498546     Delta-E=       -0.000000164626 Rises=F Damp=F
 DIIS: error= 5.99D-06 at cycle  12 NSaved=  12.
 NSaved=12 IEnMin=12 EnMin= -3262.94255498546     IErMin=12 ErrMin= 5.99D-06
 ErrMax= 5.99D-06  0.00D+00 EMaxC= 1.00D-01 BMatC= 3.79D-08 BMatP= 1.26D-07
 IDIUse=1 WtCom= 1.00D+00 WtEn= 0.00D+00
 Coeff-Com:  0.129D-03-0.281D-03-0.136D-02-0.334D-02-0.459D-02 0.121D-01
 Coeff-Com:  0.358D-01-0.170D-01-0.168D+00-0.135D+00 0.441D+00 0.841D+00
 Coeff:      0.129D-03-0.281D-03-0.136D-02-0.334D-02-0.459D-02 0.121D-01
 Coeff:      0.358D-01-0.170D-01-0.168D+00-0.135D+00 0.441D+00 0.841D+00
 Gap=     0.178 Goal=   None    Shift=    0.000
 Gap=     0.209 Goal=   None    Shift=    0.000
 RMSDP=9.27D-07 MaxDP=4.32D-05 DE=-1.65D-07 OVMax= 1.58D-04

 Cycle  13  Pass 1  IDiag  1:
 RMSU=  2.65D-07    CP:  9.80D-01  5.43D-01  9.52D-01  6.77D-01  1.31D+00
                    CP:  1.96D+00  1.97D+00  1.77D+00  1.87D+00  1.79D+00
                    CP:  1.81D+00  1.24D+00
 E= -3262.94255502305     Delta-E=       -0.000000037593 Rises=F Damp=F
 DIIS: error= 2.23D-06 at cycle  13 NSaved=  13.
 NSaved=13 IEnMin=13 EnMin= -3262.94255502305     IErMin=13 ErrMin= 2.23D-06
 ErrMax= 2.23D-06  0.00D+00 EMaxC= 1.00D-01 BMatC= 4.43D-09 BMatP= 3.79D-08
 IDIUse=1 WtCom= 1.00D+00 WtEn= 0.00D+00
 Coeff-Com:  0.106D-04-0.111D-04-0.246D-03-0.834D-03-0.201D-02-0.820D-03
 Coeff-Com:  0.953D-02 0.104D-01-0.128D-01-0.823D-01-0.502D-01 0.217D+00
 Coeff-Com:  0.912D+00
 Coeff:      0.106D-04-0.111D-04-0.246D-03-0.834D-03-0.201D-02-0.820D-03
 Coeff:      0.953D-02 0.104D-01-0.128D-01-0.823D-01-0.502D-01 0.217D+00
 Coeff:      0.912D+00
 Gap=     0.178 Goal=   None    Shift=    0.000
 Gap=     0.209 Goal=   None    Shift=    0.000
 RMSDP=2.45D-07 MaxDP=9.89D-06 DE=-3.76D-08 OVMax= 5.76D-05

 Cycle  14  Pass 1  IDiag  1:
 RMSU=  1.14D-07    CP:  9.80D-01  5.43D-01  9.52D-01  6.77D-01  1.31D+00
                    CP:  1.97D+00  1.97D+00  1.77D+00  1.88D+00  1.81D+00
                    CP:  1.91D+00  1.44D+00  1.28D+00
 E= -3262.94255502774     Delta-E=       -0.000000004689 Rises=F Damp=F
 DIIS: error= 1.13D-06 at cycle  14 NSaved=  14.
 NSaved=14 IEnMin=14 EnMin= -3262.94255502774     IErMin=14 ErrMin= 1.13D-06
 ErrMax= 1.13D-06  0.00D+00 EMaxC= 1.00D-01 BMatC= 1.42D-09 BMatP= 4.43D-09
 IDIUse=1 WtCom= 1.00D+00 WtEn= 0.00D+00
 Coeff-Com: -0.204D-04 0.488D-04 0.149D-03 0.271D-03-0.104D-03-0.266D-02
 Coeff-Com: -0.255D-02 0.818D-02 0.254D-01-0.133D-01-0.106D+00-0.555D-01
 Coeff-Com:  0.415D+00 0.731D+00
 Coeff:     -0.204D-04 0.488D-04 0.149D-03 0.271D-03-0.104D-03-0.266D-02
 Coeff:     -0.255D-02 0.818D-02 0.254D-01-0.133D-01-0.106D+00-0.555D-01
 Coeff:      0.415D+00 0.731D+00
 Gap=     0.178 Goal=   None    Shift=    0.000
 Gap=     0.209 Goal=   None    Shift=    0.000
 RMSDP=9.75D-08 MaxDP=5.32D-06 DE=-4.69D-09 OVMax= 2.44D-05

 Cycle  15  Pass 1  IDiag  1:
 RMSU=  4.46D-08    CP:  9.80D-01  5.43D-01  9.52D-01  6.77D-01  1.31D+00
                    CP:  1.97D+00  1.97D+00  1.77D+00  1.88D+00  1.82D+00
                    CP:  1.94D+00  1.50D+00  1.44D+00  1.20D+00
 E= -3262.94255502863     Delta-E=       -0.000000000895 Rises=F Damp=F
 DIIS: error= 5.70D-07 at cycle  15 NSaved=  15.
 NSaved=15 IEnMin=15 EnMin= -3262.94255502863     IErMin=15 ErrMin= 5.70D-07
 ErrMax= 5.70D-07  0.00D+00 EMaxC= 1.00D-01 BMatC= 2.00D-10 BMatP= 1.42D-09
 IDIUse=1 WtCom= 1.00D+00 WtEn= 0.00D+00
 Coeff-Com: -0.495D-05 0.988D-05 0.726D-04 0.225D-03 0.361D-03-0.263D-03
 Coeff-Com: -0.268D-02-0.737D-03 0.863D-02 0.169D-01-0.149D-01-0.648D-01
 Coeff-Com: -0.112D+00 0.194D+00 0.976D+00
 Coeff:     -0.495D-05 0.988D-05 0.726D-04 0.225D-03 0.361D-03-0.263D-03
 Coeff:     -0.268D-02-0.737D-03 0.863D-02 0.169D-01-0.149D-01-0.648D-01
 Coeff:     -0.112D+00 0.194D+00 0.976D+00
 Gap=     0.178 Goal=   None    Shift=    0.000
 Gap=     0.209 Goal=   None    Shift=    0.000
 RMSDP=5.66D-08 MaxDP=2.77D-06 DE=-8.95D-10 OVMax= 1.01D-05

 Cycle  16  Pass 1  IDiag  1:
 RMSU=  2.81D-08    CP:  9.80D-01  5.43D-01  9.52D-01  6.77D-01  1.32D+00
                    CP:  1.97D+00  1.97D+00  1.77D+00  1.88D+00  1.82D+00
                    CP:  1.95D+00  1.52D+00  1.51D+00  1.40D+00  1.34D+00
 E= -3262.94255502879     Delta-E=       -0.000000000156 Rises=F Damp=F
 DIIS: error= 2.07D-07 at cycle  16 NSaved=  16.
 NSaved=16 IEnMin=16 EnMin= -3262.94255502879     IErMin=16 ErrMin= 2.07D-07
 ErrMax= 2.07D-07  0.00D+00 EMaxC= 1.00D-01 BMatC= 2.61D-11 BMatP= 2.00D-10
 IDIUse=1 WtCom= 1.00D+00 WtEn= 0.00D+00
 Coeff-Com:  0.152D-05-0.417D-05-0.555D-05 0.920D-05 0.875D-04 0.323D-03
 Coeff-Com: -0.116D-03-0.136D-02-0.181D-02 0.464D-02 0.123D-01-0.185D-02
 Coeff-Com: -0.910D-01-0.649D-01 0.223D+00 0.921D+00
 Coeff:      0.152D-05-0.417D-05-0.555D-05 0.920D-05 0.875D-04 0.323D-03
 Coeff:     -0.116D-03-0.136D-02-0.181D-02 0.464D-02 0.123D-01-0.185D-02
 Coeff:     -0.910D-01-0.649D-01 0.223D+00 0.921D+00
 Gap=     0.178 Goal=   None    Shift=    0.000
 Gap=     0.209 Goal=   None    Shift=    0.000
 RMSDP=2.94D-08 MaxDP=1.85D-06 DE=-1.56D-10 OVMax= 5.54D-06

 Cycle  17  Pass 1  IDiag  1:
 RMSU=  9.50D-09    CP:  9.80D-01  5.43D-01  9.52D-01  6.77D-01  1.31D+00
                    CP:  1.97D+00  1.97D+00  1.77D+00  1.88D+00  1.82D+00
                    CP:  1.94D+00  1.53D+00  1.53D+00  1.46D+00  1.54D+00
                    CP:  1.22D+00
 E= -3262.94255502881     Delta-E=       -0.000000000015 Rises=F Damp=F
 DIIS: error= 7.95D-08 at cycle  17 NSaved=  17.
 NSaved=17 IEnMin=17 EnMin= -3262.94255502881     IErMin=17 ErrMin= 7.95D-08
 ErrMax= 7.95D-08  0.00D+00 EMaxC= 1.00D-01 BMatC= 6.67D-12 BMatP= 2.61D-11
 IDIUse=1 WtCom= 1.00D+00 WtEn= 0.00D+00
 Coeff-Com:  0.124D-05-0.289D-05-0.130D-04-0.295D-04-0.195D-04 0.153D-03
 Coeff-Com:  0.381D-03-0.477D-03-0.204D-02-0.629D-03 0.690D-02 0.979D-02
 Coeff-Com: -0.200D-01-0.527D-01-0.653D-01 0.378D+00 0.746D+00
 Coeff:      0.124D-05-0.289D-05-0.130D-04-0.295D-04-0.195D-04 0.153D-03
 Coeff:      0.381D-03-0.477D-03-0.204D-02-0.629D-03 0.690D-02 0.979D-02
 Coeff:     -0.200D-01-0.527D-01-0.653D-01 0.378D+00 0.746D+00
 Gap=     0.178 Goal=   None    Shift=    0.000
 Gap=     0.209 Goal=   None    Shift=    0.000
 RMSDP=9.44D-09 MaxDP=5.10D-07 DE=-1.55D-11 OVMax= 2.54D-06

 Error on total polarization charges =  0.01741
 SCF Done:  E(UM062X) =  -3262.94255503     A.U. after   17 cycles
            NFock= 17  Conv=0.94D-08     -V/T= 2.0021
 <Sx>= 0.0000 <Sy>= 0.0000 <Sz>= 0.5000 <S**2>= 0.7794 S= 0.5146
 <L.S>= 0.000000000000E+00
 KE= 3.256094924627D+03 PE=-1.054242138451D+04 EE= 2.630298269631D+03
 Annihilation of the first spin contaminant:
 S**2 before annihilation     0.7794,   after     0.7506
 Leave Link  502 at Mon Jan 13 15:11:05 2020, MaxMem=   134217728 cpu:     13498.0
 (Enter E:\Gaussian\G09W\l601.exe)
 Copying SCF densities to generalized density rwf, IOpCl= 1 IROHF=0.

 **********************************************************************

            Population analysis using the SCF density.

 **********************************************************************

 Orbital symmetries:
 Alpha Orbitals:
       Occupied  (A) (A) (A) (A) (A) (A) (A) (A) (A) (A) (A) (A)
                 (A) (A) (A) (A) (A) (A) (A) (A) (A) (A) (A) (A)
                 (A) (A) (A) (A) (A) (A) (A) (A) (A) (A) (A) (A)
                 (A) (A) (A) (A) (A) (A) (A) (A) (A) (A) (A) (A)
                 (A) (A) (A) (A) (A) (A) (A) (A) (A) (A) (A) (A)
                 (A) (A) (A) (A) (A) (A) (A) (A) (A) (A) (A) (A)
       Virtual   (A) (A) (A) (A) (A) (A) (A) (A) (A) (A) (A) (A)
                 (A) (A) (A) (A) (A) (A) (A) (A) (A) (A) (A) (A)
                 (A) (A) (A) (A) (A) (A) (A) (A) (A) (A) (A) (A)
                 (A) (A) (A) (A) (A) (A) (A) (A) (A) (A) (A) (A)
                 (A) (A) (A) (A) (A) (A) (A) (A) (A) (A) (A) (A)
                 (A) (A) (A) (A) (A) (A) (A) (A) (A) (A) (A) (A)
                 (A) (A) (A) (A) (A) (A) (A) (A) (A) (A) (A) (A)
                 (A) (A) (A) (A) (A) (A) (A) (A) (A) (A) (A) (A)
                 (A) (A) (A) (A) (A) (A) (A) (A) (A) (A) (A) (A)
                 (A) (A) (A) (A) (A) (A) (A) (A) (A) (A) (A) (A)
                 (A) (A) (A) (A) (A) (A) (A) (A) (A) (A) (A) (A)
                 (A) (A) (A) (A) (A) (A) (A) (A) (A) (A) (A) (A)
                 (A) (A) (A) (A) (A) (A) (A) (A) (A) (A) (A) (A)
                 (A) (A) (A) (A) (A) (A) (A) (A) (A) (A) (A) (A)
                 (A) (A) (A) (A) (A) (A) (A) (A) (A) (A) (A) (A)
                 (A) (A) (A) (A) (A) (A) (A) (A) (A) (A) (A) (A)
                 (A) (A) (A) (A) (A) (A) (A) (A) (A) (A) (A) (A)
                 (A) (A) (A) (A) (A) (A) (A) (A) (A) (A) (A) (A)
                 (A) (A) (A) (A) (A) (A) (A) (A) (A) (A) (A) (A)
                 (A) (A) (A) (A) (A) (A) (A) (A) (A) (A) (A) (A)
                 (A) (A) (A) (A) (A) (A) (A) (A) (A) (A) (A) (A)
                 (A) (A) (A) (A) (A) (A) (A) (A) (A) (A) (A) (A)
                 (A) (A) (A) (A) (A) (A) (A) (A) (A) (A) (A) (A)
                 (A) (A) (A) (A) (A) (A) (A) (A) (A) (A) (A) (A)
                 (A) (A) (A) (A) (A) (A) (A) (A) (A) (A) (A) (A)
                 (A) (A) (A) (A) (A) (A) (A) (A) (A) (A) (A) (A)
                 (A) (A) (A) (A) (A) (A) (A) (A) (A) (A) (A) (A)
                 (A) (A) (A) (A) (A) (A) (A) (A) (A) (A) (A) (A)
                 (A) (A) (A) (A) (A) (A) (A) (A) (A) (A) (A) (A)
                 (A) (A) (A) (A) (A) (A) (A) (A) (A) (A) (A) (A)
                 (A) (A) (A) (A) (A) (A) (A) (A) (A) (A) (A) (A)
                 (A) (A) (A) (A) (A) (A) (A) (A) (A) (A) (A) (A)
                 (A) (A) (A) (A) (A) (A) (A) (A) (A) (A) (A) (A)
                 (A) (A) (A) (A) (A) (A) (A) (A) (A) (A) (A) (A)
                 (A) (A) (A) (A) (A) (A) (A) (A) (A) (A) (A) (A)
                 (A) (A) (A) (A) (A) (A) (A) (A) (A) (A) (A) (A)
                 (A) (A) (A) (A) (A) (A) (A) (A) (A) (A) (A) (A)
                 (A) (A) (A) (A) (A) (A) (A) (A) (A) (A) (A) (A)
                 (A) (A) (A) (A) (A) (A) (A) (A) (A) (A) (A) (A)
                 (A) (A) (A) (A) (A) (A) (A) (A) (A) (A) (A) (A)
                 (A) (A) (A) (A) (A) (A) (A) (A) (A) (A) (A) (A)
                 (A) (A) (A) (A) (A) (A) (A) (A) (A) (A) (A) (A)
                 (A) (A) (A) (A) (A) (A) (A) (A) (A) (A) (A) (A)
                 (A) (A) (A) (A)
 Beta  Orbitals:
       Occupied  (A) (A) (A) (A) (A) (A) (A) (A) (A) (A) (A) (A)
                 (A) (A) (A) (A) (A) (A) (A) (A) (A) (A) (A) (A)
                 (A) (A) (A) (A) (A) (A) (A) (A) (A) (A) (A) (A)
                 (A) (A) (A) (A) (A) (A) (A) (A) (A) (A) (A) (A)
                 (A) (A) (A) (A) (A) (A) (A) (A) (A) (A) (A) (A)
                 (A) (A) (A) (A) (A) (A) (A) (A) (A) (A) (A)
       Virtual   (A) (A) (A) (A) (A) (A) (A) (A) (A) (A) (A) (A)
                 (A) (A) (A) (A) (A) (A) (A) (A) (A) (A) (A) (A)
                 (A) (A) (A) (A) (A) (A) (A) (A) (A) (A) (A) (A)
                 (A) (A) (A) (A) (A) (A) (A) (A) (A) (A) (A) (A)
                 (A) (A) (A) (A) (A) (A) (A) (A) (A) (A) (A) (A)
                 (A) (A) (A) (A) (A) (A) (A) (A) (A) (A) (A) (A)
                 (A) (A) (A) (A) (A) (A) (A) (A) (A) (A) (A) (A)
                 (A) (A) (A) (A) (A) (A) (A) (A) (A) (A) (A) (A)
                 (A) (A) (A) (A) (A) (A) (A) (A) (A) (A) (A) (A)
                 (A) (A) (A) (A) (A) (A) (A) (A) (A) (A) (A) (A)
                 (A) (A) (A) (A) (A) (A) (A) (A) (A) (A) (A) (A)
                 (A) (A) (A) (A) (A) (A) (A) (A) (A) (A) (A) (A)
                 (A) (A) (A) (A) (A) (A) (A) (A) (A) (A) (A) (A)
                 (A) (A) (A) (A) (A) (A) (A) (A) (A) (A) (A) (A)
                 (A) (A) (A) (A) (A) (A) (A) (A) (A) (A) (A) (A)
                 (A) (A) (A) (A) (A) (A) (A) (A) (A) (A) (A) (A)
                 (A) (A) (A) (A) (A) (A) (A) (A) (A) (A) (A) (A)
                 (A) (A) (A) (A) (A) (A) (A) (A) (A) (A) (A) (A)
                 (A) (A) (A) (A) (A) (A) (A) (A) (A) (A) (A) (A)
                 (A) (A) (A) (A) (A) (A) (A) (A) (A) (A) (A) (A)
                 (A) (A) (A) (A) (A) (A) (A) (A) (A) (A) (A) (A)
                 (A) (A) (A) (A) (A) (A) (A) (A) (A) (A) (A) (A)
                 (A) (A) (A) (A) (A) (A) (A) (A) (A) (A) (A) (A)
                 (A) (A) (A) (A) (A) (A) (A) (A) (A) (A) (A) (A)
                 (A) (A) (A) (A) (A) (A) (A) (A) (A) (A) (A) (A)
                 (A) (A) (A) (A) (A) (A) (A) (A) (A) (A) (A) (A)
                 (A) (A) (A) (A) (A) (A) (A) (A) (A) (A) (A) (A)
                 (A) (A) (A) (A) (A) (A) (A) (A) (A) (A) (A) (A)
                 (A) (A) (A) (A) (A) (A) (A) (A) (A) (A) (A) (A)
                 (A) (A) (A) (A) (A) (A) (A) (A) (A) (A) (A) (A)
                 (A) (A) (A) (A) (A) (A) (A) (A) (A) (A) (A) (A)
                 (A) (A) (A) (A) (A) (A) (A) (A) (A) (A) (A) (A)
                 (A) (A) (A) (A) (A) (A) (A) (A) (A) (A) (A) (A)
                 (A) (A) (A) (A) (A) (A) (A) (A) (A) (A) (A) (A)
                 (A) (A) (A) (A) (A) (A) (A) (A) (A) (A) (A) (A)
                 (A) (A) (A) (A) (A) (A) (A) (A) (A) (A) (A) (A)
                 (A) (A) (A) (A) (A) (A) (A) (A) (A) (A) (A) (A)
                 (A) (A) (A) (A) (A) (A) (A) (A) (A) (A) (A) (A)
                 (A) (A) (A) (A) (A) (A) (A) (A) (A) (A) (A) (A)
                 (A) (A) (A) (A) (A) (A) (A) (A) (A) (A) (A) (A)
                 (A) (A) (A) (A) (A) (A) (A) (A) (A) (A) (A) (A)
                 (A) (A) (A) (A) (A) (A) (A) (A) (A) (A) (A) (A)
                 (A) (A) (A) (A) (A) (A) (A) (A) (A) (A) (A) (A)
                 (A) (A) (A) (A) (A)
 The electronic state is 2-A.
 Alpha  occ. eigenvalues -- -485.38529 -63.36996 -57.18935 -57.18696 -57.18689
 Alpha  occ. eigenvalues --  -19.69080 -19.61637 -10.64410 -10.63233 -10.61883
 Alpha  occ. eigenvalues --  -10.58157 -10.58141 -10.57080 -10.56973 -10.56902
 Alpha  occ. eigenvalues --  -10.56863 -10.56829 -10.56533 -10.56238 -10.55960
 Alpha  occ. eigenvalues --  -10.55872  -9.03637  -6.86044  -6.85165  -6.85137
 Alpha  occ. eigenvalues --   -2.89417  -2.89100  -2.89068  -2.88253  -2.88252
 Alpha  occ. eigenvalues --   -1.22628  -1.16319  -1.00601  -0.98579  -0.93367
 Alpha  occ. eigenvalues --   -0.89834  -0.87664  -0.87336  -0.83802  -0.80675
 Alpha  occ. eigenvalues --   -0.74811  -0.73002  -0.70438  -0.68860  -0.65144
 Alpha  occ. eigenvalues --   -0.63973  -0.61013  -0.56960  -0.55755  -0.55327
 Alpha  occ. eigenvalues --   -0.54729  -0.53857  -0.53080  -0.51776  -0.50976
 Alpha  occ. eigenvalues --   -0.50456  -0.49786  -0.47684  -0.47058  -0.45402
 Alpha  occ. eigenvalues --   -0.44860  -0.43108  -0.42390  -0.41780  -0.39556
 Alpha  occ. eigenvalues --   -0.36558  -0.36150  -0.34270  -0.33649  -0.33353
 Alpha  occ. eigenvalues --   -0.31264  -0.23096
 Alpha virt. eigenvalues --   -0.05251  -0.01616   0.00838   0.02750   0.06175
 Alpha virt. eigenvalues --    0.06199   0.07913   0.09557   0.10322   0.11372
 Alpha virt. eigenvalues --    0.11582   0.12481   0.13658   0.14559   0.14741
 Alpha virt. eigenvalues --    0.16361   0.16700   0.17998   0.18747   0.20125
 Alpha virt. eigenvalues --    0.20653   0.21176   0.21889   0.22298   0.23118
 Alpha virt. eigenvalues --    0.23412   0.23779   0.24453   0.24883   0.25970
 Alpha virt. eigenvalues --    0.26106   0.26293   0.26921   0.27184   0.27367
 Alpha virt. eigenvalues --    0.27422   0.28874   0.28997   0.29736   0.30201
 Alpha virt. eigenvalues --    0.30731   0.31951   0.32190   0.32800   0.33265
 Alpha virt. eigenvalues --    0.33526   0.33988   0.34930   0.35575   0.35862
 Alpha virt. eigenvalues --    0.36127   0.37186   0.38060   0.38696   0.38822
 Alpha virt. eigenvalues --    0.39787   0.39980   0.40500   0.41198   0.41826
 Alpha virt. eigenvalues --    0.43000   0.43218   0.44029   0.44063   0.45716
 Alpha virt. eigenvalues --    0.46575   0.46583   0.47526   0.48088   0.48964
 Alpha virt. eigenvalues --    0.50399   0.51040   0.51063   0.52257   0.52677
 Alpha virt. eigenvalues --    0.52687   0.53796   0.54181   0.54269   0.56112
 Alpha virt. eigenvalues --    0.57088   0.57117   0.58137   0.59080   0.59986
 Alpha virt. eigenvalues --    0.61073   0.61295   0.62858   0.64640   0.65073
 Alpha virt. eigenvalues --    0.66019   0.66144   0.67259   0.67644   0.68307
 Alpha virt. eigenvalues --    0.68672   0.69129   0.69819   0.71757   0.72026
 Alpha virt. eigenvalues --    0.72728   0.73866   0.74192   0.74925   0.76109
 Alpha virt. eigenvalues --    0.76894   0.77026   0.77916   0.78002   0.78086
 Alpha virt. eigenvalues --    0.78614   0.79955   0.80477   0.80520   0.82365
 Alpha virt. eigenvalues --    0.82992   0.84914   0.85790   0.86819   0.87870
 Alpha virt. eigenvalues --    0.87944   0.90199   0.90523   0.91004   0.91245
 Alpha virt. eigenvalues --    0.91721   0.92835   0.93160   0.93834   0.95792
 Alpha virt. eigenvalues --    0.97957   0.98249   0.98756   1.00094   1.00244
 Alpha virt. eigenvalues --    1.01398   1.03483   1.04626   1.05699   1.06553
 Alpha virt. eigenvalues --    1.08023   1.10731   1.11009   1.11080   1.12829
 Alpha virt. eigenvalues --    1.13411   1.14842   1.15249   1.15905   1.19136
 Alpha virt. eigenvalues --    1.20737   1.21194   1.22212   1.23110   1.23920
 Alpha virt. eigenvalues --    1.24454   1.25913   1.26436   1.27563   1.28014
 Alpha virt. eigenvalues --    1.28770   1.29060   1.30087   1.31812   1.33718
 Alpha virt. eigenvalues --    1.34248   1.34976   1.37716   1.38102   1.39612
 Alpha virt. eigenvalues --    1.40348   1.40780   1.41407   1.42054   1.42946
 Alpha virt. eigenvalues --    1.45508   1.46311   1.46593   1.47205   1.47953
 Alpha virt. eigenvalues --    1.49028   1.49859   1.50422   1.51703   1.53395
 Alpha virt. eigenvalues --    1.53490   1.53995   1.54694   1.55760   1.56965
 Alpha virt. eigenvalues --    1.57134   1.58634   1.58856   1.59697   1.60956
 Alpha virt. eigenvalues --    1.62288   1.63117   1.64348   1.64505   1.64650
 Alpha virt. eigenvalues --    1.65440   1.66204   1.67115   1.68376   1.69126
 Alpha virt. eigenvalues --    1.70286   1.71317   1.72077   1.72587   1.73411
 Alpha virt. eigenvalues --    1.74887   1.75902   1.76371   1.77133   1.79050
 Alpha virt. eigenvalues --    1.80197   1.81971   1.82200   1.83673   1.84000
 Alpha virt. eigenvalues --    1.85037   1.87173   1.87745   1.89257   1.89839
 Alpha virt. eigenvalues --    1.90990   1.91577   1.92454   1.94303   1.94589
 Alpha virt. eigenvalues --    1.95997   1.97477   2.01113   2.02533   2.02847
 Alpha virt. eigenvalues --    2.03476   2.04120   2.08171   2.08332   2.11282
 Alpha virt. eigenvalues --    2.12091   2.13303   2.14934   2.16616   2.17123
 Alpha virt. eigenvalues --    2.18049   2.18971   2.19555   2.21159   2.21326
 Alpha virt. eigenvalues --    2.21690   2.23679   2.24951   2.26204   2.28732
 Alpha virt. eigenvalues --    2.30185   2.32583   2.33772   2.35671   2.35834
 Alpha virt. eigenvalues --    2.36466   2.36579   2.37177   2.41180   2.42039
 Alpha virt. eigenvalues --    2.45199   2.45609   2.48769   2.50686   2.51591
 Alpha virt. eigenvalues --    2.52274   2.53816   2.54418   2.58598   2.59325
 Alpha virt. eigenvalues --    2.59682   2.60719   2.61376   2.62095   2.62919
 Alpha virt. eigenvalues --    2.64059   2.65159   2.65473   2.67400   2.67616
 Alpha virt. eigenvalues --    2.68716   2.68787   2.70596   2.71865   2.72645
 Alpha virt. eigenvalues --    2.74693   2.75521   2.76479   2.77247   2.77271
 Alpha virt. eigenvalues --    2.77365   2.78919   2.80274   2.81046   2.81848
 Alpha virt. eigenvalues --    2.82818   2.82918   2.84725   2.85123   2.86721
 Alpha virt. eigenvalues --    2.86818   2.88448   2.88721   2.89064   2.89592
 Alpha virt. eigenvalues --    2.90111   2.90185   2.91427   2.93231   2.93714
 Alpha virt. eigenvalues --    2.95270   2.95600   2.96265   2.96561   2.98011
 Alpha virt. eigenvalues --    2.98885   2.99958   3.00483   3.02756   3.03094
 Alpha virt. eigenvalues --    3.03475   3.04640   3.04951   3.06002   3.08142
 Alpha virt. eigenvalues --    3.09551   3.10228   3.11443   3.11919   3.12514
 Alpha virt. eigenvalues --    3.13640   3.14209   3.15368   3.16483   3.17383
 Alpha virt. eigenvalues --    3.17693   3.18629   3.20007   3.20228   3.20638
 Alpha virt. eigenvalues --    3.21601   3.23141   3.24247   3.25880   3.28214
 Alpha virt. eigenvalues --    3.28687   3.29391   3.30176   3.30815   3.31831
 Alpha virt. eigenvalues --    3.32254   3.33043   3.33180   3.34753   3.35622
 Alpha virt. eigenvalues --    3.36177   3.39553   3.40517   3.40628   3.41267
 Alpha virt. eigenvalues --    3.41634   3.42902   3.43557   3.44076   3.45717
 Alpha virt. eigenvalues --    3.46544   3.46716   3.47844   3.47962   3.49185
 Alpha virt. eigenvalues --    3.49481   3.50230   3.51667   3.52518   3.53098
 Alpha virt. eigenvalues --    3.54650   3.56337   3.57048   3.58404   3.59486
 Alpha virt. eigenvalues --    3.59761   3.60252   3.63570   3.63922   3.65468
 Alpha virt. eigenvalues --    3.66377   3.70743   3.75189   3.76752   3.77843
 Alpha virt. eigenvalues --    3.79017   3.79200   3.81495   3.83827   3.84714
 Alpha virt. eigenvalues --    3.85861   3.86338   3.87500   3.89846   3.92294
 Alpha virt. eigenvalues --    3.96426   3.97485   3.97932   3.99352   4.01005
 Alpha virt. eigenvalues --    4.02337   4.04091   4.05080   4.05625   4.07473
 Alpha virt. eigenvalues --    4.09778   4.10797   4.11396   4.11749   4.12596
 Alpha virt. eigenvalues --    4.14107   4.15278   4.16949   4.17515   4.18467
 Alpha virt. eigenvalues --    4.20117   4.20869   4.21275   4.22483   4.22494
 Alpha virt. eigenvalues --    4.25311   4.26997   4.27859   4.29328   4.32418
 Alpha virt. eigenvalues --    4.32833   4.37087   4.37744   4.39483   4.40581
 Alpha virt. eigenvalues --    4.43510   4.47810   4.49710   4.52477   4.54769
 Alpha virt. eigenvalues --    4.55347   4.55491   4.57575   4.61795   4.64183
 Alpha virt. eigenvalues --    4.67228   4.68072   4.69509   4.72749   4.73932
 Alpha virt. eigenvalues --    4.76301   4.77322   4.78047   4.84969   4.89837
 Alpha virt. eigenvalues --    4.93385   4.96506   4.97993   5.01570   5.04390
 Alpha virt. eigenvalues --    5.05133   5.08483   5.17565   5.18597   5.22224
 Alpha virt. eigenvalues --    5.22473   5.24197   5.26441   5.28483   5.29046
 Alpha virt. eigenvalues --    5.35860   5.40573   5.41008   5.47973   5.48215
 Alpha virt. eigenvalues --    5.55534   5.58674   5.60524   5.67717   5.74196
 Alpha virt. eigenvalues --    5.77346   5.85289   6.02813   6.06283   6.33391
 Alpha virt. eigenvalues --    6.36792   6.37601   6.39711   6.42281   6.65741
 Alpha virt. eigenvalues --    6.69757   6.74836   6.80678   6.82290   7.00150
 Alpha virt. eigenvalues --    7.09388   7.16831   7.34023   7.85170  22.07266
 Alpha virt. eigenvalues --   22.58002  22.73473  22.75860  22.79804  22.84894
 Alpha virt. eigenvalues --   22.89109  22.96196  22.98954  23.09068  23.21658
 Alpha virt. eigenvalues --   23.40309  23.44126  23.97523  44.09606  44.22326
  Beta  occ. eigenvalues -- -485.38530 -63.36997 -57.18934 -57.18699 -57.18689
  Beta  occ. eigenvalues --  -19.68818 -19.61292 -10.64106 -10.63254 -10.61922
  Beta  occ. eigenvalues --  -10.58221 -10.58213 -10.57019 -10.56898 -10.56824
  Beta  occ. eigenvalues --  -10.56796 -10.56762 -10.56566 -10.56274 -10.55978
  Beta  occ. eigenvalues --  -10.55819  -9.03638  -6.86042  -6.85171  -6.85137
  Beta  occ. eigenvalues --   -2.89417  -2.89102  -2.89067  -2.88255  -2.88254
  Beta  occ. eigenvalues --   -1.21753  -1.15435  -1.00335  -0.98443  -0.93063
  Beta  occ. eigenvalues --   -0.89573  -0.87415  -0.87168  -0.83659  -0.79853
  Beta  occ. eigenvalues --   -0.74667  -0.72685  -0.70240  -0.68595  -0.64907
  Beta  occ. eigenvalues --   -0.63725  -0.60702  -0.56585  -0.55607  -0.54955
  Beta  occ. eigenvalues --   -0.53737  -0.52839  -0.52559  -0.51684  -0.50745
  Beta  occ. eigenvalues --   -0.49542  -0.48224  -0.47415  -0.46663  -0.45263
  Beta  occ. eigenvalues --   -0.43657  -0.42992  -0.42239  -0.41631  -0.38616
  Beta  occ. eigenvalues --   -0.36137  -0.34870  -0.33692  -0.32824  -0.32132
  Beta  occ. eigenvalues --   -0.30781
  Beta virt. eigenvalues --   -0.09843  -0.03862  -0.00369   0.01160   0.02726
  Beta virt. eigenvalues --    0.06294   0.08204   0.09064   0.09560   0.10296
  Beta virt. eigenvalues --    0.11283   0.11553   0.12405   0.13586   0.14552
  Beta virt. eigenvalues --    0.14666   0.16235   0.17207   0.17891   0.18708
  Beta virt. eigenvalues --    0.20017   0.20311   0.21448   0.22089   0.22327
  Beta virt. eigenvalues --    0.23009   0.23354   0.24030   0.24495   0.24862
  Beta virt. eigenvalues --    0.25813   0.26301   0.26402   0.26771   0.27307
  Beta virt. eigenvalues --    0.27359   0.27740   0.28794   0.29211   0.29755
  Beta virt. eigenvalues --    0.30109   0.30870   0.31852   0.32263   0.32851
  Beta virt. eigenvalues --    0.33354   0.33434   0.33839   0.34774   0.35532
  Beta virt. eigenvalues --    0.36005   0.36159   0.37142   0.38008   0.38498
  Beta virt. eigenvalues --    0.39053   0.39882   0.40078   0.40359   0.41169
  Beta virt. eigenvalues --    0.42011   0.43083   0.43308   0.43574   0.44133
  Beta virt. eigenvalues --    0.45883   0.46490   0.46582   0.47516   0.48161
  Beta virt. eigenvalues --    0.49068   0.50372   0.50817   0.51014   0.52330
  Beta virt. eigenvalues --    0.52797   0.52991   0.53802   0.54096   0.54246
  Beta virt. eigenvalues --    0.56047   0.57140   0.57405   0.58177   0.59302
  Beta virt. eigenvalues --    0.60123   0.61135   0.61228   0.62674   0.64671
  Beta virt. eigenvalues --    0.64752   0.66074   0.66131   0.67443   0.67616
  Beta virt. eigenvalues --    0.68238   0.68744   0.69106   0.69813   0.71711
  Beta virt. eigenvalues --    0.71834   0.72502   0.73810   0.74426   0.74757
  Beta virt. eigenvalues --    0.76118   0.76928   0.77226   0.77890   0.78058
  Beta virt. eigenvalues --    0.78314   0.78612   0.79823   0.80462   0.81116
  Beta virt. eigenvalues --    0.82767   0.82924   0.84897   0.85864   0.87053
  Beta virt. eigenvalues --    0.88001   0.88166   0.90145   0.90200   0.90897
  Beta virt. eigenvalues --    0.91508   0.91828   0.93055   0.93057   0.93692
  Beta virt. eigenvalues --    0.95808   0.98070   0.98246   0.98622   1.00335
  Beta virt. eigenvalues --    1.00403   1.01446   1.03335   1.05088   1.05701
  Beta virt. eigenvalues --    1.06542   1.08104   1.10845   1.11137   1.11145
  Beta virt. eigenvalues --    1.12998   1.13500   1.14977   1.15352   1.15991
  Beta virt. eigenvalues --    1.19189   1.20765   1.21379   1.22603   1.23244
  Beta virt. eigenvalues --    1.24278   1.24589   1.25906   1.26722   1.27771
  Beta virt. eigenvalues --    1.28095   1.28871   1.29402   1.30191   1.31838
  Beta virt. eigenvalues --    1.33922   1.34324   1.35082   1.37924   1.38392
  Beta virt. eigenvalues --    1.40076   1.40440   1.40892   1.41769   1.42059
  Beta virt. eigenvalues --    1.43868   1.45802   1.46635   1.46752   1.47452
  Beta virt. eigenvalues --    1.47945   1.49449   1.49952   1.50730   1.52600
  Beta virt. eigenvalues --    1.53678   1.54087   1.54149   1.54907   1.56282
  Beta virt. eigenvalues --    1.57048   1.57489   1.58905   1.59027   1.59872
  Beta virt. eigenvalues --    1.61080   1.62869   1.63402   1.64626   1.64677
  Beta virt. eigenvalues --    1.64892   1.65565   1.66606   1.67399   1.68450
  Beta virt. eigenvalues --    1.70077   1.70456   1.71790   1.72462   1.72846
  Beta virt. eigenvalues --    1.73620   1.75416   1.76064   1.76484   1.77281
  Beta virt. eigenvalues --    1.79122   1.80286   1.82126   1.82330   1.83828
  Beta virt. eigenvalues --    1.84377   1.85136   1.87512   1.87873   1.89595
  Beta virt. eigenvalues --    1.89959   1.91430   1.92441   1.92650   1.94582
  Beta virt. eigenvalues --    1.94877   1.96462   1.97693   2.01293   2.02815
  Beta virt. eigenvalues --    2.03210   2.03861   2.04447   2.08424   2.08535
  Beta virt. eigenvalues --    2.11841   2.12349   2.13493   2.15180   2.17044
  Beta virt. eigenvalues --    2.17458   2.18233   2.19221   2.19968   2.21651
  Beta virt. eigenvalues --    2.21735   2.22477   2.23842   2.25114   2.26455
  Beta virt. eigenvalues --    2.29227   2.30534   2.32953   2.33971   2.35922
  Beta virt. eigenvalues --    2.36800   2.36836   2.36940   2.37959   2.41438
  Beta virt. eigenvalues --    2.42244   2.45491   2.45859   2.48944   2.50799
  Beta virt. eigenvalues --    2.51789   2.52477   2.54893   2.55813   2.58970
  Beta virt. eigenvalues --    2.59476   2.59814   2.60942   2.61626   2.63255
  Beta virt. eigenvalues --    2.63328   2.64890   2.65344   2.66424   2.67894
  Beta virt. eigenvalues --    2.68167   2.68949   2.69860   2.71563   2.72052
  Beta virt. eigenvalues --    2.72861   2.74919   2.76113   2.76669   2.77498
  Beta virt. eigenvalues --    2.77992   2.78761   2.79230   2.80613   2.81486
  Beta virt. eigenvalues --    2.82415   2.83071   2.83269   2.84989   2.85547
  Beta virt. eigenvalues --    2.87233   2.88638   2.88854   2.88994   2.89706
  Beta virt. eigenvalues --    2.89868   2.90640   2.91263   2.91774   2.94055
  Beta virt. eigenvalues --    2.94490   2.95849   2.96211   2.96783   2.96919
  Beta virt. eigenvalues --    2.98597   2.99486   3.00209   3.00897   3.03286
  Beta virt. eigenvalues --    3.03774   3.04110   3.04889   3.05621   3.06383
  Beta virt. eigenvalues --    3.08483   3.10094   3.10871   3.11991   3.12714
  Beta virt. eigenvalues --    3.13362   3.13995   3.14705   3.15908   3.17013
  Beta virt. eigenvalues --    3.17982   3.18469   3.19133   3.20401   3.20891
  Beta virt. eigenvalues --    3.21075   3.22270   3.23909   3.25880   3.26856
  Beta virt. eigenvalues --    3.28840   3.29190   3.29822   3.31076   3.31188
  Beta virt. eigenvalues --    3.32417   3.32517   3.33523   3.33752   3.35117
  Beta virt. eigenvalues --    3.35972   3.37006   3.39814   3.40803   3.41369
  Beta virt. eigenvalues --    3.42053   3.42250   3.43355   3.44180   3.44477
  Beta virt. eigenvalues --    3.46210   3.47235   3.47709   3.48406   3.48565
  Beta virt. eigenvalues --    3.49590   3.49998   3.51121   3.52041   3.53086
  Beta virt. eigenvalues --    3.53683   3.55063   3.56763   3.57862   3.58865
  Beta virt. eigenvalues --    3.60037   3.60324   3.60755   3.63823   3.64907
  Beta virt. eigenvalues --    3.65727   3.67294   3.70913   3.76311   3.77306
  Beta virt. eigenvalues --    3.78667   3.79266   3.79854   3.81876   3.84668
  Beta virt. eigenvalues --    3.85577   3.86330   3.86824   3.87835   3.90675
  Beta virt. eigenvalues --    3.92825   3.97242   3.98071   3.99584   4.01246
  Beta virt. eigenvalues --    4.01772   4.02683   4.04677   4.05307   4.05634
  Beta virt. eigenvalues --    4.07928   4.09959   4.11478   4.11963   4.12473
  Beta virt. eigenvalues --    4.12859   4.14992   4.15499   4.17603   4.17942
  Beta virt. eigenvalues --    4.18653   4.20398   4.21212   4.22197   4.22842
  Beta virt. eigenvalues --    4.23099   4.26366   4.27309   4.28301   4.30121
  Beta virt. eigenvalues --    4.33312   4.34141   4.37475   4.39203   4.39961
  Beta virt. eigenvalues --    4.41246   4.44192   4.48007   4.50400   4.53013
  Beta virt. eigenvalues --    4.55205   4.56076   4.56384   4.58133   4.62587
  Beta virt. eigenvalues --    4.64912   4.68710   4.68837   4.70273   4.73514
  Beta virt. eigenvalues --    4.74520   4.76960   4.77706   4.78772   4.85618
  Beta virt. eigenvalues --    4.90733   4.94182   4.97362   4.98980   5.02659
  Beta virt. eigenvalues --    5.05558   5.06378   5.09258   5.18511   5.19168
  Beta virt. eigenvalues --    5.23207   5.23248   5.24709   5.27319   5.29683
  Beta virt. eigenvalues --    5.29943   5.36753   5.41497   5.41927   5.48482
  Beta virt. eigenvalues --    5.48781   5.56350   5.59503   5.62137   5.69607
  Beta virt. eigenvalues --    5.74961   5.77832   5.86398   6.03518   6.07302
  Beta virt. eigenvalues --    6.34213   6.37587   6.39084   6.41647   6.42976
  Beta virt. eigenvalues --    6.67777   6.70510   6.75642   6.82670   6.82883
  Beta virt. eigenvalues --    7.00340   7.10352   7.17163   7.34237   7.85171
  Beta virt. eigenvalues --   22.07332  22.58070  22.73635  22.75911  22.79929
  Beta virt. eigenvalues --   22.84880  22.89258  22.96372  22.99024  23.09222
  Beta virt. eigenvalues --   23.22314  23.40521  23.44271  23.97870  44.09579
  Beta virt. eigenvalues --   44.22294
          Condensed to atoms (all electrons):
               1          2          3          4          5          6
     1  C    4.987707   0.410774  -0.019996  -0.031721   0.015919   0.431928
     2  C    0.410774   5.420883   0.202857  -0.144686  -0.168736   0.032643
     3  C   -0.019996   0.202857   5.700022   0.461720  -0.049594  -0.056517
     4  C   -0.031721  -0.144686   0.461720   5.261476   0.355230  -0.077642
     5  C    0.015919  -0.168736  -0.049594   0.355230   5.246607   0.475004
     6  C    0.431928   0.032643  -0.056517  -0.077642   0.475004   4.970520
     7  H    0.421924  -0.038412   0.006920   0.000919   0.006812  -0.038113
     8  H   -0.032461   0.433244  -0.059164   0.006390  -0.003463   0.007631
     9  H    0.001130   0.000610   0.009749  -0.058653   0.408574  -0.005578
    10  H   -0.036481   0.005613   0.000119   0.006400  -0.033909   0.418378
    11  C   -0.005983   0.026332   0.062965   0.307181  -0.113750   0.006407
    12  C    0.016410  -0.130168   0.078687   0.071419   0.021611  -0.004579
    13  C    0.002922  -0.009545  -0.169636  -0.012993   0.055480  -0.001367
    14  C   -0.007121   0.093339  -0.015344  -0.147138  -0.009654   0.003079
    15  C   -0.000059   0.001584  -0.000390   0.026700  -0.007399   0.000009
    16  C    0.000257  -0.013495   0.093668  -0.004315   0.001621  -0.000191
    17  C   -0.000003  -0.000110   0.002284  -0.001067   0.000143  -0.000003
    18  H    0.000003  -0.000020  -0.000197   0.000295  -0.000058  -0.000007
    19  C    0.000001   0.000224  -0.006769   0.001615  -0.000104   0.000001
    20  H    0.000001  -0.000637   0.006305  -0.000118   0.000017  -0.000002
    21  H    0.000000   0.000003  -0.000022  -0.000010   0.000000   0.000000
    22  Br   0.000000   0.000000  -0.000028   0.000112   0.000000   0.000000
    23  O   -0.000133   0.060711  -0.248162   0.002054  -0.000340   0.000912
    24  O   -0.000173   0.000079  -0.001090  -0.104744   0.009820   0.002605
    25  H   -0.000128   0.000201   0.000379  -0.032690   0.017360   0.001837
               7          8          9         10         11         12
     1  C    0.421924  -0.032461   0.001130  -0.036481  -0.005983   0.016410
     2  C   -0.038412   0.433244   0.000610   0.005613   0.026332  -0.130168
     3  C    0.006920  -0.059164   0.009749   0.000119   0.062965   0.078687
     4  C    0.000919   0.006390  -0.058653   0.006400   0.307181   0.071419
     5  C    0.006812  -0.003463   0.408574  -0.033909  -0.113750   0.021611
     6  C   -0.038113   0.007631  -0.005578   0.418378   0.006407  -0.004579
     7  H    0.473420  -0.003622  -0.000265  -0.003328   0.000108  -0.000524
     8  H   -0.003622   0.468073   0.000043  -0.000136   0.001119  -0.018208
     9  H   -0.000265   0.000043   0.502040  -0.003661  -0.006044   0.001052
    10  H   -0.003328  -0.000136  -0.003661   0.472686  -0.000244   0.000077
    11  C    0.000108   0.001119  -0.006044  -0.000244   5.181304  -0.171667
    12  C   -0.000524  -0.018208   0.001052   0.000077  -0.171667   5.115067
    13  C   -0.000010  -0.000268   0.003790  -0.000026   0.148109   0.094491
    14  C   -0.000036   0.006612  -0.000714   0.000014   0.027403   0.068169
    15  C    0.000000   0.000001  -0.000064   0.000001  -0.047427   0.010278
    16  C    0.000004  -0.000664  -0.000032   0.000000   0.009142  -0.128040
    17  C    0.000000   0.000001  -0.000004   0.000000  -0.007863  -0.003452
    18  H    0.000000   0.000000  -0.000017   0.000000  -0.014890   0.000489
    19  C    0.000000  -0.000004   0.000002   0.000000   0.007362   0.014080
    20  H    0.000000  -0.000059   0.000000   0.000000   0.000171  -0.015083
    21  H    0.000000   0.000000   0.000000   0.000000   0.000394  -0.000347
    22  Br   0.000000   0.000000   0.000000   0.000000  -0.002638   0.000057
    23  O   -0.000155   0.022601   0.000010   0.000002  -0.009911   0.784016
    24  O   -0.000001   0.000007  -0.002467  -0.000007   0.416521  -0.000616
    25  H   -0.000002   0.000002   0.005727   0.000031  -0.020728  -0.000060
              13         14         15         16         17         18
     1  C    0.002922  -0.007121  -0.000059   0.000257  -0.000003   0.000003
     2  C   -0.009545   0.093339   0.001584  -0.013495  -0.000110  -0.000020
     3  C   -0.169636  -0.015344  -0.000390   0.093668   0.002284  -0.000197
     4  C   -0.012993  -0.147138   0.026700  -0.004315  -0.001067   0.000295
     5  C    0.055480  -0.009654  -0.007399   0.001621   0.000143  -0.000058
     6  C   -0.001367   0.003079   0.000009  -0.000191  -0.000003  -0.000007
     7  H   -0.000010  -0.000036   0.000000   0.000004   0.000000   0.000000
     8  H   -0.000268   0.006612   0.000001  -0.000664   0.000001   0.000000
     9  H    0.003790  -0.000714  -0.000064  -0.000032  -0.000004  -0.000017
    10  H   -0.000026   0.000014   0.000001   0.000000   0.000000   0.000000
    11  C    0.148109   0.027403  -0.047427   0.009142  -0.007863  -0.014890
    12  C    0.094491   0.068169   0.010278  -0.128040  -0.003452   0.000489
    13  C    5.367763   0.495725   0.238037  -0.116856   0.013233  -0.015660
    14  C    0.495725   5.738832  -0.046632   0.163754  -0.065887   0.010831
    15  C    0.238037  -0.046632   5.504252  -0.176778   0.360637   0.402298
    16  C   -0.116856   0.163754  -0.176778   5.470520   0.074421  -0.002764
    17  C    0.013233  -0.065887   0.360637   0.074421   4.913864  -0.038767
    18  H   -0.015660   0.010831   0.402298  -0.002764  -0.038767   0.449228
    19  C   -0.061171   0.001355   0.043317   0.336723   0.342143   0.009441
    20  H    0.004545  -0.054627  -0.001525   0.425400   0.005232   0.000047
    21  H   -0.000908   0.005992   0.013309  -0.032367  -0.050699   0.000030
    22  Br   0.018351  -0.001765  -0.102578   0.020673   0.372575  -0.005989
    23  O    0.000300  -0.252770  -0.000055   0.061953   0.000633   0.000010
    24  O   -0.167251  -0.004076   0.036995  -0.000314  -0.001136   0.010272
    25  H    0.019255   0.000145  -0.002212   0.000009  -0.000050  -0.000231
              19         20         21         22         23         24
     1  C    0.000001   0.000001   0.000000   0.000000  -0.000133  -0.000173
     2  C    0.000224  -0.000637   0.000003   0.000000   0.060711   0.000079
     3  C   -0.006769   0.006305  -0.000022  -0.000028  -0.248162  -0.001090
     4  C    0.001615  -0.000118  -0.000010   0.000112   0.002054  -0.104744
     5  C   -0.000104   0.000017   0.000000   0.000000  -0.000340   0.009820
     6  C    0.000001  -0.000002   0.000000   0.000000   0.000912   0.002605
     7  H    0.000000   0.000000   0.000000   0.000000  -0.000155  -0.000001
     8  H   -0.000004  -0.000059   0.000000   0.000000   0.022601   0.000007
     9  H    0.000002   0.000000   0.000000   0.000000   0.000010  -0.002467
    10  H    0.000000   0.000000   0.000000   0.000000   0.000002  -0.000007
    11  C    0.007362   0.000171   0.000394  -0.002638  -0.009911   0.416521
    12  C    0.014080  -0.015083  -0.000347   0.000057   0.784016  -0.000616
    13  C   -0.061171   0.004545  -0.000908   0.018351   0.000300  -0.167251
    14  C    0.001355  -0.054627   0.005992  -0.001765  -0.252770  -0.004076
    15  C    0.043317  -0.001525   0.013309  -0.102578  -0.000055   0.036995
    16  C    0.336723   0.425400  -0.032367   0.020673   0.061953  -0.000314
    17  C    0.342143   0.005232  -0.050699   0.372575   0.000633  -0.001136
    18  H    0.009441   0.000047   0.000030  -0.005989   0.000010   0.010272
    19  C    5.176446  -0.027787   0.422641  -0.098676   0.001111   0.000397
    20  H   -0.027787   0.463065  -0.002809  -0.000228   0.022146   0.000005
    21  H    0.422641  -0.002809   0.463903  -0.006780  -0.000128   0.000000
    22  Br  -0.098676  -0.000228  -0.006780  34.911220   0.000000  -0.000007
    23  O    0.001111   0.022146  -0.000128   0.000000   7.982867   0.000001
    24  O    0.000397   0.000005   0.000000  -0.000007   0.000001   7.904025
    25  H    0.000009  -0.000001   0.000000  -0.000006  -0.000001   0.312479
              25
     1  C   -0.000128
     2  C    0.000201
     3  C    0.000379
     4  C   -0.032690
     5  C    0.017360
     6  C    0.001837
     7  H   -0.000002
     8  H    0.000002
     9  H    0.005727
    10  H    0.000031
    11  C   -0.020728
    12  C   -0.000060
    13  C    0.019255
    14  C    0.000145
    15  C   -0.002212
    16  C    0.000009
    17  C   -0.000050
    18  H   -0.000231
    19  C    0.000009
    20  H   -0.000001
    21  H    0.000000
    22  Br  -0.000006
    23  O   -0.000001
    24  O    0.312479
    25  H    0.338624
          Atomic-Atomic Spin Densities.
               1          2          3          4          5          6
     1  C    0.147296   0.019415  -0.013031   0.003345  -0.007369  -0.015484
     2  C    0.019415  -0.063345  -0.013702   0.005313  -0.000399  -0.000898
     3  C   -0.013031  -0.013702   0.179355  -0.024395   0.012869   0.005034
     4  C    0.003345   0.005313  -0.024395  -0.111035  -0.030356   0.000149
     5  C   -0.007369  -0.000399   0.012869  -0.030356   0.142215   0.015013
     6  C   -0.015484  -0.000898   0.005034   0.000149   0.015013  -0.074654
     7  H    0.000095   0.000580  -0.000092   0.000011   0.000135  -0.000647
     8  H   -0.000307   0.000861  -0.000329   0.000063   0.000065  -0.000092
     9  H    0.000225  -0.000022   0.000059  -0.001565   0.001175   0.000123
    10  H   -0.000990  -0.000043  -0.000074  -0.000142   0.000340  -0.000062
    11  C    0.000921  -0.001357  -0.014287   0.053811  -0.010277  -0.001442
    12  C    0.000126   0.006180   0.026098  -0.006096  -0.001856  -0.000004
    13  C    0.000326  -0.000844  -0.007677  -0.002047  -0.001197  -0.000254
    14  C   -0.000620  -0.001098   0.018797  -0.007858   0.000706   0.000240
    15  C   -0.000010  -0.000011  -0.000365   0.001352   0.000037   0.000024
    16  C    0.000006   0.000464  -0.000174  -0.001701  -0.000039  -0.000005
    17  C    0.000000  -0.000006   0.000355  -0.000560   0.000027   0.000000
    18  H    0.000000   0.000002  -0.000017   0.000149  -0.000001   0.000001
    19  C    0.000001   0.000006  -0.000790   0.000499  -0.000002   0.000000
    20  H    0.000000   0.000042  -0.000190  -0.000026  -0.000001   0.000000
    21  H    0.000000   0.000000  -0.000003   0.000002   0.000000   0.000000
    22  Br   0.000000   0.000000   0.000000  -0.000001   0.000000   0.000000
    23  O    0.000046   0.001810  -0.009125  -0.000159  -0.000068  -0.000011
    24  O   -0.000043  -0.000013   0.000532   0.001449   0.003973   0.000073
    25  H    0.000011  -0.000015  -0.000118   0.000095   0.000489  -0.000016
               7          8          9         10         11         12
     1  C    0.000095  -0.000307   0.000225  -0.000990   0.000921   0.000126
     2  C    0.000580   0.000861  -0.000022  -0.000043  -0.001357   0.006180
     3  C   -0.000092  -0.000329   0.000059  -0.000074  -0.014287   0.026098
     4  C    0.000011   0.000063  -0.001565  -0.000142   0.053811  -0.006096
     5  C    0.000135   0.000065   0.001175   0.000340  -0.010277  -0.001856
     6  C   -0.000647  -0.000092   0.000123  -0.000062  -0.001442  -0.000004
     7  H   -0.003310  -0.000020   0.000001  -0.000026   0.000003  -0.000010
     8  H   -0.000020   0.001111   0.000000   0.000000  -0.000079   0.000933
     9  H    0.000001   0.000000  -0.003577  -0.000066   0.000520  -0.000054
    10  H   -0.000026   0.000000  -0.000066   0.001574   0.000024  -0.000003
    11  C    0.000003  -0.000079   0.000520   0.000024   0.441634   0.018238
    12  C   -0.000010   0.000933  -0.000054  -0.000003   0.018238  -0.078409
    13  C    0.000001  -0.000020   0.000022  -0.000001   0.058064  -0.004801
    14  C   -0.000001  -0.000243   0.000021   0.000001  -0.016953   0.028290
    15  C    0.000000   0.000000  -0.000012   0.000000  -0.011267  -0.000955
    16  C    0.000000   0.000046   0.000001   0.000000   0.000129   0.004170
    17  C    0.000000   0.000000   0.000001   0.000000  -0.001527   0.000023
    18  H    0.000000   0.000000   0.000000   0.000000   0.000432  -0.000030
    19  C    0.000000   0.000000   0.000000   0.000000   0.000592   0.000220
    20  H    0.000000   0.000005   0.000000   0.000000  -0.000045   0.000912
    21  H    0.000000   0.000000   0.000000   0.000000  -0.000001  -0.000008
    22  Br   0.000000   0.000000   0.000000   0.000000   0.000053  -0.000003
    23  O    0.000003  -0.001154   0.000000   0.000000   0.000536  -0.032682
    24  O    0.000000   0.000000  -0.000155   0.000000  -0.085479   0.000034
    25  H    0.000000   0.000000  -0.000063  -0.000003  -0.000121   0.000015
              13         14         15         16         17         18
     1  C    0.000326  -0.000620  -0.000010   0.000006   0.000000   0.000000
     2  C   -0.000844  -0.001098  -0.000011   0.000464  -0.000006   0.000002
     3  C   -0.007677   0.018797  -0.000365  -0.000174   0.000355  -0.000017
     4  C   -0.002047  -0.007858   0.001352  -0.001701  -0.000560   0.000149
     5  C   -0.001197   0.000706   0.000037  -0.000039   0.000027  -0.000001
     6  C   -0.000254   0.000240   0.000024  -0.000005   0.000000   0.000001
     7  H    0.000001  -0.000001   0.000000   0.000000   0.000000   0.000000
     8  H   -0.000020  -0.000243   0.000000   0.000046   0.000000   0.000000
     9  H    0.000022   0.000021  -0.000012   0.000001   0.000001   0.000000
    10  H   -0.000001   0.000001   0.000000   0.000000   0.000000   0.000000
    11  C    0.058064  -0.016953  -0.011267   0.000129  -0.001527   0.000432
    12  C   -0.004801   0.028290  -0.000955   0.004170   0.000023  -0.000030
    13  C   -0.102493  -0.026264  -0.026851   0.004269   0.000417  -0.000227
    14  C   -0.026264   0.175837   0.008561  -0.010333   0.005202  -0.000075
    15  C   -0.026851   0.008561   0.135924  -0.002310   0.012637  -0.000082
    16  C    0.004269  -0.010333  -0.002310  -0.063093  -0.000331  -0.000059
    17  C    0.000417   0.005202   0.012637  -0.000331  -0.063834   0.000681
    18  H   -0.000227  -0.000075  -0.000082  -0.000059   0.000681  -0.002987
    19  C    0.003687  -0.010865  -0.005570   0.015728  -0.016998   0.000313
    20  H    0.000021  -0.000237  -0.000038   0.000844   0.000005  -0.000002
    21  H   -0.000066  -0.000015   0.000430   0.000116  -0.000598   0.000003
    22  Br   0.000112  -0.000197  -0.002966  -0.000035   0.006297  -0.000017
    23  O   -0.000103  -0.009519  -0.000077   0.001850  -0.000004   0.000000
    24  O   -0.002254   0.000423   0.006135   0.000019   0.000238  -0.000708
    25  H   -0.000192  -0.000033   0.000008   0.000001   0.000002   0.000010
              19         20         21         22         23         24
     1  C    0.000001   0.000000   0.000000   0.000000   0.000046  -0.000043
     2  C    0.000006   0.000042   0.000000   0.000000   0.001810  -0.000013
     3  C   -0.000790  -0.000190  -0.000003   0.000000  -0.009125   0.000532
     4  C    0.000499  -0.000026   0.000002  -0.000001  -0.000159   0.001449
     5  C   -0.000002  -0.000001   0.000000   0.000000  -0.000068   0.003973
     6  C    0.000000   0.000000   0.000000   0.000000  -0.000011   0.000073
     7  H    0.000000   0.000000   0.000000   0.000000   0.000003   0.000000
     8  H    0.000000   0.000005   0.000000   0.000000  -0.001154   0.000000
     9  H    0.000000   0.000000   0.000000   0.000000   0.000000  -0.000155
    10  H    0.000000   0.000000   0.000000   0.000000   0.000000   0.000000
    11  C    0.000592  -0.000045  -0.000001   0.000053   0.000536  -0.085479
    12  C    0.000220   0.000912  -0.000008  -0.000003  -0.032682   0.000034
    13  C    0.003687   0.000021  -0.000066   0.000112  -0.000103  -0.002254
    14  C   -0.010865  -0.000237  -0.000015  -0.000197  -0.009519   0.000423
    15  C   -0.005570  -0.000038   0.000430  -0.002966  -0.000077   0.006135
    16  C    0.015728   0.000844   0.000116  -0.000035   0.001850   0.000019
    17  C   -0.016998   0.000005  -0.000598   0.006297  -0.000004   0.000238
    18  H    0.000313  -0.000002   0.000003  -0.000017   0.000000  -0.000708
    19  C    0.140081  -0.000493   0.000076  -0.000366  -0.000020  -0.000087
    20  H   -0.000493   0.001028  -0.000026   0.000001  -0.001093   0.000000
    21  H    0.000076  -0.000026  -0.002477   0.000075   0.000002   0.000000
    22  Br  -0.000366   0.000001   0.000075  -0.004725   0.000000  -0.000004
    23  O   -0.000020  -0.001093   0.000002   0.000000   0.229778  -0.000002
    24  O   -0.000087   0.000000   0.000000  -0.000004  -0.000002   0.161572
    25  H    0.000000   0.000000   0.000000   0.000000   0.000000   0.000134
              25
     1  C    0.000011
     2  C   -0.000015
     3  C   -0.000118
     4  C    0.000095
     5  C    0.000489
     6  C   -0.000016
     7  H    0.000000
     8  H    0.000000
     9  H   -0.000063
    10  H   -0.000003
    11  C   -0.000121
    12  C    0.000015
    13  C   -0.000192
    14  C   -0.000033
    15  C    0.000008
    16  C    0.000001
    17  C    0.000002
    18  H    0.000010
    19  C    0.000000
    20  H    0.000000
    21  H    0.000000
    22  Br   0.000000
    23  O    0.000000
    24  O    0.000134
    25  H   -0.003110
 Mulliken charges and spin densities:
               1          2
     1  C   -0.154719   0.133959
     2  C   -0.183289  -0.047081
     3  C    0.001237   0.158731
     4  C    0.114263  -0.119702
     5  C   -0.227190   0.125477
     6  C   -0.166955  -0.072912
     7  H    0.174358  -0.003276
     8  H    0.172325   0.000836
     9  H    0.144771  -0.003365
    10  H    0.174474   0.000529
    11  C    0.206625   0.432122
    12  C    0.196845  -0.039672
    13  C    0.093692  -0.108370
    14  C   -0.009486   0.153767
    15  C   -0.252300   0.114595
    16  C   -0.182329  -0.050437
    17  C    0.083875  -0.057975
    18  H    0.195654  -0.002615
    19  C   -0.162358   0.126011
    20  H    0.175942   0.000707
    21  H    0.187798  -0.002492
    22  Br  -0.104291  -0.001776
    23  O   -0.427671   0.180009
    24  O   -0.411324   0.085839
    25  H    0.360051  -0.002908
 Sum of Mulliken charges =   0.00000   1.00000
 Mulliken charges and spin densities with hydrogens summed into heavy atoms:
               1          2
     1  C    0.019639   0.130683
     2  C   -0.010964  -0.046244
     3  C    0.001237   0.158731
     4  C    0.114263  -0.119702
     5  C   -0.082419   0.122113
     6  C    0.007519  -0.072383
    11  C    0.206625   0.432122
    12  C    0.196845  -0.039672
    13  C    0.093692  -0.108370
    14  C   -0.009486   0.153767
    15  C   -0.056645   0.111980
    16  C   -0.006387  -0.049730
    17  C    0.083875  -0.057975
    19  C    0.025440   0.123519
    22  Br  -0.104291  -0.001776
    23  O   -0.427671   0.180009
    24  O   -0.051273   0.082931
 Electronic spatial extent (au):  <R**2>=           6241.7512
 Charge=              0.0000 electrons
 Dipole moment (field-independent basis, Debye):
    X=             -3.2066    Y=             -5.7349    Z=              0.0001  Tot=              6.5705
 Quadrupole moment (field-independent basis, Debye-Ang):
   XX=            -93.6284   YY=           -105.6430   ZZ=           -114.3501
   XY=             19.7037   XZ=             -0.0002   YZ=             -0.0008
 Traceless Quadrupole moment (field-independent basis, Debye-Ang):
   XX=             10.9121   YY=             -1.1025   ZZ=             -9.8096
   XY=             19.7037   XZ=             -0.0002   YZ=             -0.0008
 Octapole moment (field-independent basis, Debye-Ang**2):
  XXX=             -3.0526  YYY=            -89.0357  ZZZ=              0.0004  XYY=             41.3696
  XXY=            -39.7982  XXZ=             -0.0003  XZZ=             51.2017  YZZ=             -5.3490
  YYZ=              0.0017  XYZ=              0.0006
 Hexadecapole moment (field-independent basis, Debye-Ang**3):
 XXXX=          -5222.1162 YYYY=          -1330.9231 ZZZZ=           -128.7136 XXXY=             58.1771
 XXXZ=              0.0026 YYYX=            164.5021 YYYZ=             -0.0103 ZZZX=             -0.0006
 ZZZY=             -0.0006 XXYY=          -1126.6073 XXZZ=          -1096.3333 YYZZ=           -263.9313
 XXYZ=              0.0011 YYXZ=             -0.0018 ZZXY=            -27.0489
 N-N= 1.393085635225D+03 E-N=-1.054242139729D+04  KE= 3.256094924627D+03
                          Isotropic Fermi Contact Couplings
        Atom                 a.u.       MegaHertz       Gauss      10(-4) cm-1
     1  C(13)              0.01483      16.66738       5.94733       5.55964
     2  C(13)             -0.01234     -13.86812      -4.94849      -4.62591
     3  C(13)              0.01404      15.78762       5.63341       5.26618
     4  C(13)             -0.02670     -30.01719     -10.71088     -10.01266
     5  C(13)              0.01341      15.07416       5.37884       5.02820
     6  C(13)             -0.01168     -13.13410      -4.68657      -4.38106
     7  H(1)              -0.00193      -8.62766      -3.07856      -2.87788
     8  H(1)               0.00053       2.35443       0.84012       0.78535
     9  H(1)              -0.00174      -7.77780      -2.77531      -2.59439
    10  H(1)               0.00057       2.54561       0.90834       0.84912
    11  C(13)              0.06570      73.85782      26.35431      24.63632
    12  C(13)             -0.01335     -15.00988      -5.35590      -5.00676
    13  C(13)             -0.02567     -28.86051     -10.29815      -9.62683
    14  C(13)              0.01324      14.88115       5.30996       4.96382
    15  C(13)              0.01161      13.04724       4.65558       4.35209
    16  C(13)             -0.01227     -13.79559      -4.92261      -4.60171
    17  C(13)             -0.01288     -14.48288      -5.16785      -4.83097
    18  H(1)              -0.00162      -7.25953      -2.59038      -2.42152
    19  C(13)              0.01393      15.65880       5.58745       5.22321
    20  H(1)               0.00054       2.41554       0.86193       0.80574
    21  H(1)              -0.00180      -8.03869      -2.86841      -2.68142
    22  Br(79)            -0.00141      -1.58120      -0.56421      -0.52743
    23  O(17)              0.03316     -20.09971      -7.17208      -6.70454
    24  O(17)              0.01835     -11.12541      -3.96982      -3.71104
    25  H(1)              -0.00178      -7.93977      -2.83311      -2.64842
 --------------------------------------------------------
       Center         ----  Spin Dipole Couplings  ----
                      3XX-RR        3YY-RR        3ZZ-RR
 --------------------------------------------------------
     1   Atom       -0.057413     -0.063860      0.121272
     2   Atom        0.024726      0.018110     -0.042836
     3   Atom       -0.061736     -0.064833      0.126569
     4   Atom        0.038497      0.023960     -0.062457
     5   Atom       -0.051664     -0.056212      0.107877
     6   Atom        0.024632      0.021045     -0.045678
     7   Atom        0.009250     -0.007972     -0.001278
     8   Atom        0.005670     -0.002139     -0.003531
     9   Atom       -0.003509      0.006944     -0.003435
    10   Atom        0.002428     -0.000339     -0.002090
    11   Atom       -0.259434     -0.259613      0.519047
    12   Atom       -0.012126      0.008503      0.003623
    13   Atom        0.028113      0.022959     -0.051071
    14   Atom       -0.060292     -0.063416      0.123708
    15   Atom       -0.048151     -0.051032      0.099182
    16   Atom        0.026676      0.017583     -0.044260
    17   Atom        0.021175      0.020848     -0.042023
    18   Atom       -0.000821      0.004626     -0.003806
    19   Atom       -0.055682     -0.059156      0.114838
    20   Atom        0.005627     -0.002190     -0.003437
    21   Atom        0.003117     -0.001917     -0.001200
    22   Atom        0.035254      0.013870     -0.049124
    23   Atom       -0.357723     -0.377461      0.735183
    24   Atom       -0.263582     -0.292233      0.555815
    25   Atom        0.003450      0.005983     -0.009434
 --------------------------------------------------------
                        XY            XZ            YZ
 --------------------------------------------------------
     1   Atom       -0.000568      0.000001     -0.000003
     2   Atom        0.003298      0.000000      0.000001
     3   Atom        0.000787      0.000001     -0.000003
     4   Atom       -0.002369      0.000000      0.000001
     5   Atom       -0.000888     -0.000002     -0.000007
     6   Atom       -0.001865      0.000001      0.000002
     7   Atom       -0.004480      0.000000      0.000000
     8   Atom        0.001721      0.000000      0.000000
     9   Atom        0.000049      0.000000      0.000000
    10   Atom       -0.001834      0.000000      0.000000
    11   Atom        0.000743     -0.000007      0.000017
    12   Atom       -0.004483      0.000001      0.000000
    13   Atom        0.006930     -0.000001     -0.000002
    14   Atom        0.000796      0.000001     -0.000001
    15   Atom        0.002804      0.000000      0.000002
    16   Atom        0.000380      0.000000     -0.000001
    17   Atom        0.002653      0.000000     -0.000001
    18   Atom       -0.002733      0.000000      0.000000
    19   Atom        0.002685      0.000000      0.000001
    20   Atom        0.001836      0.000000      0.000000
    21   Atom        0.008830      0.000000      0.000000
    22   Atom       -0.009860      0.000000     -0.000001
    23   Atom        0.004399      0.000019     -0.000012
    24   Atom        0.022356      0.000044      0.000051
    25   Atom        0.019789     -0.000002     -0.000002
 --------------------------------------------------------


 ---------------------------------------------------------------------------------
              Anisotropic Spin Dipole Couplings in Principal Axis System
 ---------------------------------------------------------------------------------

       Atom             a.u.   MegaHertz   Gauss  10(-4) cm-1        Axes

              Baa    -0.0639    -8.576    -3.060    -2.861  0.0870  0.9962  0.0000
     1 C(13)  Bbb    -0.0574    -7.698    -2.747    -2.568  0.9962 -0.0870  0.0000
              Bcc     0.1213    16.274     5.807     5.428  0.0000  0.0000  1.0000
 
              Baa    -0.0428    -5.748    -2.051    -1.917  0.0000  0.0000  1.0000
     2 C(13)  Bbb     0.0167     2.247     0.802     0.750 -0.3820  0.9242  0.0000
              Bcc     0.0261     3.501     1.249     1.168  0.9242  0.3820  0.0000
 
              Baa    -0.0650    -8.725    -3.113    -2.910 -0.2330  0.9725  0.0000
     3 C(13)  Bbb    -0.0615    -8.259    -2.947    -2.755  0.9725  0.2330  0.0000
              Bcc     0.1266    16.984     6.060     5.665  0.0000  0.0000  1.0000
 
              Baa    -0.0625    -8.381    -2.991    -2.796  0.0000  0.0000  1.0000
     4 C(13)  Bbb     0.0236     3.165     1.129     1.056  0.1569  0.9876  0.0000
              Bcc     0.0389     5.216     1.861     1.740  0.9876 -0.1569  0.0000
 
              Baa    -0.0564    -7.566    -2.700    -2.524  0.1851  0.9827  0.0000
     5 C(13)  Bbb    -0.0515    -6.910    -2.466    -2.305  0.9827 -0.1851  0.0000
              Bcc     0.1079    14.476     5.165     4.829  0.0000  0.0000  1.0000
 
              Baa    -0.0457    -6.129    -2.187    -2.045  0.0000  0.0000  1.0000
     6 C(13)  Bbb     0.0203     2.717     0.970     0.906  0.3917  0.9201  0.0000
              Bcc     0.0254     3.412     1.217     1.138  0.9201 -0.3917  0.0000
 
              Baa    -0.0091    -4.838    -1.726    -1.614  0.2375  0.9714  0.0000
     7 H(1)   Bbb    -0.0013    -0.682    -0.243    -0.227  0.0000  0.0000  1.0000
              Bcc     0.0103     5.520     1.970     1.841  0.9714 -0.2375  0.0000
 
              Baa    -0.0035    -1.884    -0.672    -0.628  0.0000  0.0000  1.0000
     8 H(1)   Bbb    -0.0025    -1.335    -0.476    -0.445 -0.2061  0.9785  0.0000
              Bcc     0.0060     3.219     1.149     1.074  0.9785  0.2061  0.0000
 
              Baa    -0.0035    -1.872    -0.668    -0.625  1.0000 -0.0047 -0.0006
     9 H(1)   Bbb    -0.0034    -1.833    -0.654    -0.611  0.0006  0.0000  1.0000
              Bcc     0.0069     3.705     1.322     1.236  0.0047  1.0000  0.0000
 
              Baa    -0.0021    -1.115    -0.398    -0.372  0.0000  0.0000  1.0000
    10 H(1)   Bbb    -0.0013    -0.668    -0.238    -0.223  0.4459  0.8951  0.0000
              Bcc     0.0033     1.783     0.636     0.595  0.8951 -0.4459  0.0000
 
              Baa    -0.2603   -34.926   -12.462   -11.650 -0.6634  0.7483  0.0000
    11 C(13)  Bbb    -0.2588   -34.725   -12.391   -11.583  0.7483  0.6634  0.0000
              Bcc     0.5190    69.651    24.853    23.233  0.0000  0.0000  1.0000
 
              Baa    -0.0131    -1.752    -0.625    -0.584  0.9791  0.2036 -0.0001
    12 C(13)  Bbb     0.0036     0.486     0.173     0.162  0.0001  0.0000  1.0000
              Bcc     0.0094     1.266     0.452     0.422 -0.2036  0.9791  0.0000
 
              Baa    -0.0511    -6.853    -2.445    -2.286  0.0000  0.0000  1.0000
    13 C(13)  Bbb     0.0181     2.434     0.869     0.812 -0.5707  0.8211  0.0000
              Bcc     0.0329     4.419     1.577     1.474  0.8211  0.5707  0.0000
 
              Baa    -0.0636    -8.535    -3.046    -2.847 -0.2334  0.9724  0.0000
    14 C(13)  Bbb    -0.0601    -8.065    -2.878    -2.690  0.9724  0.2334  0.0000
              Bcc     0.1237    16.600     5.923     5.537  0.0000  0.0000  1.0000
 
              Baa    -0.0527    -7.078    -2.526    -2.361 -0.5211  0.8535  0.0000
    15 C(13)  Bbb    -0.0464    -6.232    -2.224    -2.079  0.8535  0.5211  0.0000
              Bcc     0.0992    13.309     4.749     4.440  0.0000  0.0000  1.0000
 
              Baa    -0.0443    -5.939    -2.119    -1.981  0.0000  0.0000  1.0000
    16 C(13)  Bbb     0.0176     2.357     0.841     0.786 -0.0416  0.9991  0.0000
              Bcc     0.0267     3.582     1.278     1.195  0.9991  0.0416  0.0000
 
              Baa    -0.0420    -5.639    -2.012    -1.881  0.0000  0.0000  1.0000
    17 C(13)  Bbb     0.0184     2.463     0.879     0.822 -0.6850  0.7285  0.0000
              Bcc     0.0237     3.176     1.133     1.059  0.7285  0.6850  0.0000
 
              Baa    -0.0038    -2.030    -0.725    -0.677  0.0000  0.0000  1.0000
    18 H(1)   Bbb    -0.0020    -1.043    -0.372    -0.348  0.9235  0.3835  0.0000
              Bcc     0.0058     3.074     1.097     1.025 -0.3835  0.9235  0.0000
 
              Baa    -0.0606    -8.134    -2.902    -2.713 -0.4779  0.8784  0.0000
    19 C(13)  Bbb    -0.0542    -7.276    -2.596    -2.427  0.8784  0.4779  0.0000
              Bcc     0.1148    15.410     5.499     5.140  0.0000  0.0000  1.0000
 
              Baa    -0.0034    -1.834    -0.654    -0.612  0.0000  0.0000  1.0000
    20 H(1)   Bbb    -0.0026    -1.387    -0.495    -0.463 -0.2178  0.9760  0.0000
              Bcc     0.0060     3.221     1.149     1.074  0.9760  0.2178  0.0000
 
              Baa    -0.0086    -4.579    -1.634    -1.527 -0.6024  0.7982  0.0000
    21 H(1)   Bbb    -0.0012    -0.640    -0.228    -0.214  0.0000  0.0000  1.0000
              Bcc     0.0098     5.219     1.862     1.741  0.7982  0.6024  0.0000
 
              Baa    -0.0491    -6.589    -2.351    -2.198  0.0000  0.0000  1.0000
    22 Br(79) Bbb     0.0100     1.344     0.479     0.448  0.3639  0.9314  0.0000
              Bcc     0.0391     5.246     1.872     1.750  0.9314 -0.3639  0.0000
 
              Baa    -0.3784    27.381     9.770     9.133 -0.2081  0.9781  0.0000
    23 O(17)  Bbb    -0.3568    25.817     9.212     8.612  0.9781  0.2081  0.0000
              Bcc     0.7352   -53.197   -18.982   -17.745  0.0000  0.0000  1.0000
 
              Baa    -0.3045    22.030     7.861     7.349 -0.4798  0.8774  0.0000
    24 O(17)  Bbb    -0.2514    18.188     6.490     6.067  0.8774  0.4798 -0.0001
              Bcc     0.5558   -40.218   -14.351   -13.415  0.0001  0.0001  1.0000
 
              Baa    -0.0151    -8.064    -2.877    -2.690  0.7293 -0.6842 -0.0001
    25 H(1)   Bbb    -0.0094    -5.033    -1.796    -1.679  0.0001  0.0000  1.0000
              Bcc     0.0245    13.097     4.673     4.369  0.6842  0.7293 -0.0001
 

 ---------------------------------------------------------------------------------

 No NMR shielding tensors so no spin-rotation constants.
 Leave Link  601 at Mon Jan 13 15:11:13 2020, MaxMem=   134217728 cpu:         5.0
 (Enter E:\Gaussian\G09W\l9999.exe)
 1|1|UNPC-DESKTOP-K4OTQA5|SP|UM062X|Gen|C14H8Br1O2(2)|������|13-Jan-202
 0|0||#p um062x/gen scrf=(solvent=acetonitrile) guess=save geom=connect
 ivity empiricaldispersion=gd3||2-BrHAQ energy||0,2|C,0,-5.06866,0.0901
 81,0.000001|C,0,-4.031023,1.005624,0.000013|C,0,-2.695349,0.584694,0.0
 00008|C,0,-2.39667,-0.809539,-0.000007|C,0,-3.475974,-1.727369,-0.0000
 33|C,0,-4.782894,-1.285051,-0.000027|H,0,-6.097632,0.430558,0.000011|H
 ,0,-4.225405,2.071015,0.000022|H,0,-3.303373,-2.798496,-0.000081|H,0,-
 5.591646,-2.006785,-0.00005|C,0,-1.034349,-1.229904,0.00001|C,0,-1.628
 799,1.599446,0.000009|C,0,0.035134,-0.288673,0.000002|C,0,-0.245541,1.
 103273,-0.000006|C,0,1.381959,-0.723634,0.000007|C,0,0.816012,2.017355
 ,-0.000017|C,0,2.391883,0.212107,-0.000005|H,0,1.602141,-1.781485,0.00
 002|C,0,2.131571,1.591933,-0.000019|H,0,0.581427,3.074516,-0.000023|H,
 0,2.945604,2.30502,-0.000026|Br,0,4.215831,-0.379851,-0.000002|O,0,-1.
 883636,2.81113,0.000025|O,0,-0.668669,-2.526633,0.000027|H,0,-1.430559
 ,-3.118213,0.00015||Version=IA32W-G09RevD.01|State=2-A|HF=-3262.942555
 |S2=0.779395|S2-1=0.|S2A=0.750637|RMSD=9.441e-009|Dipole=-1.2615771,-2
 .2562931,0.0000573|Quadrupole=8.1128806,-0.8196909,-7.2931897,14.64918
 2,-0.0001133,-0.0006314|PG=C01 [X(C14H8Br1O2)]||@


 I take a simple view of life: keep your eyes open and get on with it.
 -- Laurence Olivier
 Job cpu time:       0 days  3 hours 46 minutes  1.0 seconds.
 File lengths (MBytes):  RWF=    405 Int=      0 D2E=      0 Chk=     18 Scr=      1
 Normal termination of Gaussian 09 at Mon Jan 13 15:11:14 2020.
