# Supplementary material for: 2-Bromoanthraquinone as a highly efficient photocatalyst for the oxidation of sec-aromatic alcohols: experimental and DFT study
Source: Royal Society of Chemistry journal article supplement (doi:10.1039/d0ra06414a), 2020-01-01
Supplement: d0ra06414a5.out [file d0ra06414a5.out]

 Entering Link 1 = E:\Gaussian\G09W\l1.exe PID=     81200.
  
 Copyright (c) 1988,1990,1992,1993,1995,1998,2003,2009,2013,
            Gaussian, Inc.  All Rights Reserved.
  
 This is part of the Gaussian(R) 09 program.  It is based on
 the Gaussian(R) 03 system (copyright 2003, Gaussian, Inc.),
 the Gaussian(R) 98 system (copyright 1998, Gaussian, Inc.),
 the Gaussian(R) 94 system (copyright 1995, Gaussian, Inc.),
 the Gaussian 92(TM) system (copyright 1992, Gaussian, Inc.),
 the Gaussian 90(TM) system (copyright 1990, Gaussian, Inc.),
 the Gaussian 88(TM) system (copyright 1988, Gaussian, Inc.),
 the Gaussian 86(TM) system (copyright 1986, Carnegie Mellon
 University), and the Gaussian 82(TM) system (copyright 1983,
 Carnegie Mellon University). Gaussian is a federally registered
 trademark of Gaussian, Inc.
  
 This software contains proprietary and confidential information,
 including trade secrets, belonging to Gaussian, Inc.
  
 This software is provided under written license and may be
 used, copied, transmitted, or stored only in accord with that
 written license.
  
 The following legend is applicable only to US Government
 contracts under FAR:
  
                    RESTRICTED RIGHTS LEGEND
  
 Use, reproduction and disclosure by the US Government is
 subject to restrictions as set forth in subparagraphs (a)
 and (c) of the Commercial Computer Software - Restricted
 Rights clause in FAR 52.227-19.
  
 Gaussian, Inc.
 340 Quinnipiac St., Bldg. 40, Wallingford CT 06492
  
  
 ---------------------------------------------------------------
 Warning -- This program may not be used in any manner that
 competes with the business of Gaussian, Inc. or will provide
 assistance to any competitor of Gaussian, Inc.  The licensee
 of this program is prohibited from giving any competitor of
 Gaussian, Inc. access to this program.  By using this program,
 the user acknowledges that Gaussian, Inc. is engaged in the
 business of creating and licensing software in the field of
 computational chemistry and represents and warrants to the
 licensee that it is not a competitor of Gaussian, Inc. and that
 it will not use this program in any manner prohibited above.
 ---------------------------------------------------------------
  

 Cite this work as:
 Gaussian 09, Revision D.01,
 M. J. Frisch, G. W. Trucks, H. B. Schlegel, G. E. Scuseria, 
 M. A. Robb, J. R. Cheeseman, G. Scalmani, V. Barone, B. Mennucci, 
 G. A. Petersson, H. Nakatsuji, M. Caricato, X. Li, H. P. Hratchian, 
 A. F. Izmaylov, J. Bloino, G. Zheng, J. L. Sonnenberg, M. Hada, 
 M. Ehara, K. Toyota, R. Fukuda, J. Hasegawa, M. Ishida, T. Nakajima, 
 Y. Honda, O. Kitao, H. Nakai, T. Vreven, J. A. Montgomery, Jr., 
 J. E. Peralta, F. Ogliaro, M. Bearpark, J. J. Heyd, E. Brothers, 
 K. N. Kudin, V. N. Staroverov, T. Keith, R. Kobayashi, J. Normand, 
 K. Raghavachari, A. Rendell, J. C. Burant, S. S. Iyengar, J. Tomasi, 
 M. Cossi, N. Rega, J. M. Millam, M. Klene, J. E. Knox, J. B. Cross, 
 V. Bakken, C. Adamo, J. Jaramillo, R. Gomperts, R. E. Stratmann, 
 O. Yazyev, A. J. Austin, R. Cammi, C. Pomelli, J. W. Ochterski, 
 R. L. Martin, K. Morokuma, V. G. Zakrzewski, G. A. Voth, 
 P. Salvador, J. J. Dannenberg, S. Dapprich, A. D. Daniels, 
 O. Farkas, J. B. Foresman, J. V. Ortiz, J. Cioslowski, 
 and D. J. Fox, Gaussian, Inc., Wallingford CT, 2013.
 
 ******************************************
 Gaussian 09:  IA32W-G09RevD.01 24-Apr-2013
                09-Jan-2020 
 ******************************************
 %nprocshared=2
 Will use up to    2 processors via shared memory.
 %mem=1GB
 %chk=E:\Gaussian file\2-BrHAQ opt.chk
 ----------------------------------------------------------------------
 #p opt b3lyp/6-311g(d) scrf=(solvent=acetonitrile) guess=save geom=con
 nectivity empiricaldispersion=gd3bj
 ----------------------------------------------------------------------
 1/14=-1,18=20,19=15,26=3,38=1,57=2/1,3;
 2/9=110,12=2,17=6,18=5,40=1/2;
 3/5=4,6=6,7=1,11=2,16=1,25=1,30=1,70=2201,71=1,72=2,74=-5,124=41/1,2,3;
 4//1;
 5/5=2,38=5,53=2/2;
 6/7=2,8=2,9=2,10=2,28=1/1;
 7//1,2,3,16;
 1/14=-1,18=20,19=15,26=3/3(2);
 2/9=110/2;
 99//99;
 2/9=110/2;
 3/5=4,6=6,7=1,11=2,16=1,25=1,30=1,70=2205,71=1,72=2,74=-5,124=41/1,2,3;
 4/5=5,16=3,69=1/1;
 5/5=2,38=5,53=2/2;
 7//1,2,3,16;
 1/14=-1,18=20,19=15,26=3/3(-5);
 2/9=110/2;
 6/7=2,8=2,9=2,10=2,19=2,28=1/1;
 99/9=1/99;
 Leave Link    1 at Thu Jan 09 21:31:30 2020, MaxMem=   134217728 cpu:         0.0
 (Enter E:\Gaussian\G09W\l101.exe)
 -----------
 2-BrHAQ opt
 -----------
 Symbolic Z-matrix:
 Charge =  0 Multiplicity = 2
 C                    -3.73932   0.64103   0. 
 C                    -4.77617   1.55907  -0.00044 
 C                    -6.11506   1.14131   0.00015 
 C                    -6.41526  -0.2544    0.00139 
 C                    -5.33584  -1.17444   0.00352 
 C                    -4.02685  -0.73458   0.00225 
 H                    -2.70949   0.98005  -0.00133 
 H                    -4.57357   2.62333  -0.00107 
 H                    -5.50866  -2.24591   0.00739 
 H                    -3.21894  -1.4578    0.00388 
 C                    -7.77975  -0.67274  -0.00059 
 C                    -7.18376   2.15514   0.00034 
 C                    -8.85055   0.26864   0.00052 
 C                    -8.56904   1.66178   0.00151 
 C                    -10.19884  -0.16691   0.00033 
 C                    -9.63396   2.57499   0.0028 
 C                    -11.21109   0.76749   0.00126 
 H                    -10.41868  -1.22535  -0.00104 
 C                    -10.95027   2.14783   0.00268 
 H                    -9.40659   3.63413   0.00384 
 H                    -11.76375   2.86227   0.00323 
 Br                   -13.03574   0.17345   0.00056 
 O                    -6.92753   3.36996  -0.00071 
 O                    -8.148    -1.97058   0.00077 
 H                    -7.3917   -2.57057  -0.01142 
 
 NAtoms=     25 NQM=       25 NQMF=       0 NMMI=      0 NMMIF=      0
                NMic=       0 NMicF=      0.
                    Isotopes and Nuclear Properties:
 (Nuclear quadrupole moments (NQMom) in fm**2, nuclear magnetic moments (NMagM)
  in nuclear magnetons)

  Atom         1           2           3           4           5           6           7           8           9          10
 IAtWgt=          12          12          12          12          12          12           1           1           1           1
 AtmWgt=  12.0000000  12.0000000  12.0000000  12.0000000  12.0000000  12.0000000   1.0078250   1.0078250   1.0078250   1.0078250
 NucSpn=           0           0           0           0           0           0           1           1           1           1
 AtZEff=   0.0000000   0.0000000   0.0000000   0.0000000   0.0000000   0.0000000   0.0000000   0.0000000   0.0000000   0.0000000
 NQMom=    0.0000000   0.0000000   0.0000000   0.0000000   0.0000000   0.0000000   0.0000000   0.0000000   0.0000000   0.0000000
 NMagM=    0.0000000   0.0000000   0.0000000   0.0000000   0.0000000   0.0000000   2.7928460   2.7928460   2.7928460   2.7928460
 AtZNuc=   6.0000000   6.0000000   6.0000000   6.0000000   6.0000000   6.0000000   1.0000000   1.0000000   1.0000000   1.0000000

  Atom        11          12          13          14          15          16          17          18          19          20
 IAtWgt=          12          12          12          12          12          12          12           1          12           1
 AtmWgt=  12.0000000  12.0000000  12.0000000  12.0000000  12.0000000  12.0000000  12.0000000   1.0078250  12.0000000   1.0078250
 NucSpn=           0           0           0           0           0           0           0           1           0           1
 AtZEff=   0.0000000   0.0000000   0.0000000   0.0000000   0.0000000   0.0000000   0.0000000   0.0000000   0.0000000   0.0000000
 NQMom=    0.0000000   0.0000000   0.0000000   0.0000000   0.0000000   0.0000000   0.0000000   0.0000000   0.0000000   0.0000000
 NMagM=    0.0000000   0.0000000   0.0000000   0.0000000   0.0000000   0.0000000   0.0000000   2.7928460   0.0000000   2.7928460
 AtZNuc=   6.0000000   6.0000000   6.0000000   6.0000000   6.0000000   6.0000000   6.0000000   1.0000000   6.0000000   1.0000000

  Atom        21          22          23          24          25
 IAtWgt=           1          79          16          16           1
 AtmWgt=   1.0078250  78.9183361  15.9949146  15.9949146   1.0078250
 NucSpn=           1           3           0           0           1
 AtZEff=   0.0000000   0.0000000   0.0000000   0.0000000   0.0000000
 NQMom=    0.0000000  31.3000000   0.0000000   0.0000000   0.0000000
 NMagM=    2.7928460   2.1063990   0.0000000   0.0000000   2.7928460
 AtZNuc=   1.0000000  35.0000000   8.0000000   8.0000000   1.0000000
 Leave Link  101 at Thu Jan 09 21:31:30 2020, MaxMem=   134217728 cpu:         0.0
 (Enter E:\Gaussian\G09W\l103.exe)

 GradGradGradGradGradGradGradGradGradGradGradGradGradGradGradGradGradGrad
 Berny optimization.
 Initialization pass.
                           ----------------------------
                           !    Initial Parameters    !
                           ! (Angstroms and Degrees)  !
 --------------------------                            --------------------------
 ! Name  Definition              Value          Derivative Info.                !
 --------------------------------------------------------------------------------
 ! R1    R(1,2)                  1.3849         estimate D2E/DX2                !
 ! R2    R(1,6)                  1.4053         estimate D2E/DX2                !
 ! R3    R(1,7)                  1.0842         estimate D2E/DX2                !
 ! R4    R(2,3)                  1.4026         estimate D2E/DX2                !
 ! R5    R(2,8)                  1.0834         estimate D2E/DX2                !
 ! R6    R(3,4)                  1.4276         estimate D2E/DX2                !
 ! R7    R(3,12)                 1.4731         estimate D2E/DX2                !
 ! R8    R(4,5)                  1.4183         estimate D2E/DX2                !
 ! R9    R(4,11)                 1.4272         estimate D2E/DX2                !
 ! R10   R(5,6)                  1.3809         estimate D2E/DX2                !
 ! R11   R(5,9)                  1.0853         estimate D2E/DX2                !
 ! R12   R(6,10)                 1.0843         estimate D2E/DX2                !
 ! R13   R(11,13)                1.4258         estimate D2E/DX2                !
 ! R14   R(11,24)                1.3491         estimate D2E/DX2                !
 ! R15   R(12,14)                1.4705         estimate D2E/DX2                !
 ! R16   R(12,23)                1.2415         estimate D2E/DX2                !
 ! R17   R(13,14)                1.4213         estimate D2E/DX2                !
 ! R18   R(13,15)                1.4169         estimate D2E/DX2                !
 ! R19   R(14,16)                1.4029         estimate D2E/DX2                !
 ! R20   R(15,17)                1.3776         estimate D2E/DX2                !
 ! R21   R(15,18)                1.081          estimate D2E/DX2                !
 ! R22   R(16,19)                1.3839         estimate D2E/DX2                !
 ! R23   R(16,20)                1.0833         estimate D2E/DX2                !
 ! R24   R(17,19)                1.4048         estimate D2E/DX2                !
 ! R25   R(17,22)                1.9189         estimate D2E/DX2                !
 ! R26   R(19,21)                1.0827         estimate D2E/DX2                !
 ! R27   R(24,25)                0.9655         estimate D2E/DX2                !
 ! A1    A(2,1,6)              119.7161         estimate D2E/DX2                !
 ! A2    A(2,1,7)              120.2561         estimate D2E/DX2                !
 ! A3    A(6,1,7)              120.0278         estimate D2E/DX2                !
 ! A4    A(1,2,3)              121.1487         estimate D2E/DX2                !
 ! A5    A(1,2,8)              120.7443         estimate D2E/DX2                !
 ! A6    A(3,2,8)              118.107          estimate D2E/DX2                !
 ! A7    A(2,3,4)              119.4676         estimate D2E/DX2                !
 ! A8    A(2,3,12)             119.1803         estimate D2E/DX2                !
 ! A9    A(4,3,12)             121.3521         estimate D2E/DX2                !
 ! A10   A(3,4,5)              118.304          estimate D2E/DX2                !
 ! A11   A(3,4,11)             119.1835         estimate D2E/DX2                !
 ! A12   A(5,4,11)             122.5125         estimate D2E/DX2                !
 ! A13   A(4,5,6)              120.9837         estimate D2E/DX2                !
 ! A14   A(4,5,9)              121.2803         estimate D2E/DX2                !
 ! A15   A(6,5,9)              117.7359         estimate D2E/DX2                !
 ! A16   A(1,6,5)              120.3798         estimate D2E/DX2                !
 ! A17   A(1,6,10)             120.0275         estimate D2E/DX2                !
 ! A18   A(5,6,10)             119.5926         estimate D2E/DX2                !
 ! A19   A(4,11,13)            121.6352         estimate D2E/DX2                !
 ! A20   A(4,11,24)            122.886          estimate D2E/DX2                !
 ! A21   A(13,11,24)           115.4785         estimate D2E/DX2                !
 ! A22   A(3,12,14)            116.906          estimate D2E/DX2                !
 ! A23   A(3,12,23)            121.5806         estimate D2E/DX2                !
 ! A24   A(14,12,23)           121.5134         estimate D2E/DX2                !
 ! A25   A(11,13,14)           119.8956         estimate D2E/DX2                !
 ! A26   A(11,13,15)           120.7777         estimate D2E/DX2                !
 ! A27   A(14,13,15)           119.3267         estimate D2E/DX2                !
 ! A28   A(12,14,13)           121.0273         estimate D2E/DX2                !
 ! A29   A(12,14,16)           119.7824         estimate D2E/DX2                !
 ! A30   A(13,14,16)           119.1902         estimate D2E/DX2                !
 ! A31   A(13,15,17)           119.3875         estimate D2E/DX2                !
 ! A32   A(13,15,18)           119.636          estimate D2E/DX2                !
 ! A33   A(17,15,18)           120.9766         estimate D2E/DX2                !
 ! A34   A(14,16,19)           121.4068         estimate D2E/DX2                !
 ! A35   A(14,16,20)           118.4985         estimate D2E/DX2                !
 ! A36   A(19,16,20)           120.0947         estimate D2E/DX2                !
 ! A37   A(15,17,19)           122.0098         estimate D2E/DX2                !
 ! A38   A(15,17,22)           119.2568         estimate D2E/DX2                !
 ! A39   A(19,17,22)           118.7335         estimate D2E/DX2                !
 ! A40   A(16,19,17)           118.6791         estimate D2E/DX2                !
 ! A41   A(16,19,21)           120.7301         estimate D2E/DX2                !
 ! A42   A(17,19,21)           120.5908         estimate D2E/DX2                !
 ! A43   A(11,24,25)           112.5823         estimate D2E/DX2                !
 ! D1    D(6,1,2,3)             -0.0564         estimate D2E/DX2                !
 ! D2    D(6,1,2,8)            179.9333         estimate D2E/DX2                !
 ! D3    D(7,1,2,3)            179.9467         estimate D2E/DX2                !
 ! D4    D(7,1,2,8)             -0.0635         estimate D2E/DX2                !
 ! D5    D(2,1,6,5)              0.0236         estimate D2E/DX2                !
 ! D6    D(2,1,6,10)          -179.9214         estimate D2E/DX2                !
 ! D7    D(7,1,6,5)           -179.9795         estimate D2E/DX2                !
 ! D8    D(7,1,6,10)             0.0755         estimate D2E/DX2                !
 ! D9    D(1,2,3,4)              0.0083         estimate D2E/DX2                !
 ! D10   D(1,2,3,12)           179.9694         estimate D2E/DX2                !
 ! D11   D(8,2,3,4)           -179.9817         estimate D2E/DX2                !
 ! D12   D(8,2,3,12)            -0.0206         estimate D2E/DX2                !
 ! D13   D(2,3,4,5)              0.0704         estimate D2E/DX2                !
 ! D14   D(2,3,4,11)          -179.8823         estimate D2E/DX2                !
 ! D15   D(12,3,4,5)          -179.8898         estimate D2E/DX2                !
 ! D16   D(12,3,4,11)            0.1575         estimate D2E/DX2                !
 ! D17   D(2,3,12,14)         -179.9756         estimate D2E/DX2                !
 ! D18   D(2,3,12,23)            0.0381         estimate D2E/DX2                !
 ! D19   D(4,3,12,14)           -0.0153         estimate D2E/DX2                !
 ! D20   D(4,3,12,23)          179.9984         estimate D2E/DX2                !
 ! D21   D(3,4,5,6)             -0.1037         estimate D2E/DX2                !
 ! D22   D(3,4,5,9)            179.8235         estimate D2E/DX2                !
 ! D23   D(11,4,5,6)           179.8474         estimate D2E/DX2                !
 ! D24   D(11,4,5,9)            -0.2255         estimate D2E/DX2                !
 ! D25   D(3,4,11,13)           -0.202          estimate D2E/DX2                !
 ! D26   D(3,4,11,24)         -179.9817         estimate D2E/DX2                !
 ! D27   D(5,4,11,13)          179.8473         estimate D2E/DX2                !
 ! D28   D(5,4,11,24)            0.0677         estimate D2E/DX2                !
 ! D29   D(4,5,6,1)              0.0576         estimate D2E/DX2                !
 ! D30   D(4,5,6,10)          -179.9972         estimate D2E/DX2                !
 ! D31   D(9,5,6,1)           -179.8721         estimate D2E/DX2                !
 ! D32   D(9,5,6,10)             0.0732         estimate D2E/DX2                !
 ! D33   D(4,11,13,14)           0.0996         estimate D2E/DX2                !
 ! D34   D(4,11,13,15)        -179.9149         estimate D2E/DX2                !
 ! D35   D(24,11,13,14)        179.8946         estimate D2E/DX2                !
 ! D36   D(24,11,13,15)         -0.1199         estimate D2E/DX2                !
 ! D37   D(4,11,24,25)          -0.9383         estimate D2E/DX2                !
 ! D38   D(13,11,24,25)        179.2696         estimate D2E/DX2                !
 ! D39   D(3,12,14,13)          -0.0892         estimate D2E/DX2                !
 ! D40   D(3,12,14,16)         179.9505         estimate D2E/DX2                !
 ! D41   D(23,12,14,13)        179.8972         estimate D2E/DX2                !
 ! D42   D(23,12,14,16)         -0.0632         estimate D2E/DX2                !
 ! D43   D(11,13,14,12)          0.0494         estimate D2E/DX2                !
 ! D44   D(11,13,14,16)       -179.99           estimate D2E/DX2                !
 ! D45   D(15,13,14,12)       -179.9364         estimate D2E/DX2                !
 ! D46   D(15,13,14,16)          0.0243         estimate D2E/DX2                !
 ! D47   D(11,13,15,17)       -179.9927         estimate D2E/DX2                !
 ! D48   D(11,13,15,18)         -0.0229         estimate D2E/DX2                !
 ! D49   D(14,13,15,17)         -0.0071         estimate D2E/DX2                !
 ! D50   D(14,13,15,18)        179.9627         estimate D2E/DX2                !
 ! D51   D(12,14,16,19)        179.9393         estimate D2E/DX2                !
 ! D52   D(12,14,16,20)         -0.0562         estimate D2E/DX2                !
 ! D53   D(13,14,16,19)         -0.0218         estimate D2E/DX2                !
 ! D54   D(13,14,16,20)        179.9827         estimate D2E/DX2                !
 ! D55   D(13,15,17,19)         -0.0133         estimate D2E/DX2                !
 ! D56   D(13,15,17,22)        179.9851         estimate D2E/DX2                !
 ! D57   D(18,15,17,19)       -179.9828         estimate D2E/DX2                !
 ! D58   D(18,15,17,22)          0.0156         estimate D2E/DX2                !
 ! D59   D(14,16,19,17)          0.0019         estimate D2E/DX2                !
 ! D60   D(14,16,19,21)       -179.9722         estimate D2E/DX2                !
 ! D61   D(20,16,19,17)        179.9973         estimate D2E/DX2                !
 ! D62   D(20,16,19,21)          0.0233         estimate D2E/DX2                !
 ! D63   D(15,17,19,16)          0.0161         estimate D2E/DX2                !
 ! D64   D(15,17,19,21)        179.9902         estimate D2E/DX2                !
 ! D65   D(22,17,19,16)       -179.9823         estimate D2E/DX2                !
 ! D66   D(22,17,19,21)         -0.0081         estimate D2E/DX2                !
 --------------------------------------------------------------------------------
 Trust Radius=3.00D-01 FncErr=1.00D-07 GrdErr=1.00D-06
 Number of steps in this run=    146 maximum allowed number of steps=    150.
 GradGradGradGradGradGradGradGradGradGradGradGradGradGradGradGradGradGrad

 Leave Link  103 at Thu Jan 09 21:31:31 2020, MaxMem=   134217728 cpu:         0.0
 (Enter E:\Gaussian\G09W\l202.exe)
                          Input orientation:                          
 ---------------------------------------------------------------------
 Center     Atomic      Atomic             Coordinates (Angstroms)
 Number     Number       Type             X           Y           Z
 ---------------------------------------------------------------------
      1          6           0       -3.739316    0.641026    0.000000
      2          6           0       -4.776168    1.559075   -0.000436
      3          6           0       -6.115061    1.141313    0.000146
      4          6           0       -6.415259   -0.254400    0.001387
      5          6           0       -5.335842   -1.174438    0.003524
      6          6           0       -4.026850   -0.734584    0.002245
      7          1           0       -2.709488    0.980046   -0.001331
      8          1           0       -4.573574    2.623331   -0.001072
      9          1           0       -5.508659   -2.245910    0.007394
     10          1           0       -3.218937   -1.457795    0.003884
     11          6           0       -7.779748   -0.672739   -0.000586
     12          6           0       -7.183760    2.155142    0.000335
     13          6           0       -8.850552    0.268638    0.000515
     14          6           0       -8.569035    1.661779    0.001508
     15          6           0      -10.198843   -0.166914    0.000327
     16          6           0       -9.633956    2.574989    0.002799
     17          6           0      -11.211090    0.767487    0.001259
     18          1           0      -10.418679   -1.225350   -0.001038
     19          6           0      -10.950265    2.147832    0.002675
     20          1           0       -9.406589    3.634128    0.003835
     21          1           0      -11.763748    2.862269    0.003228
     22         35           0      -13.035743    0.173451    0.000564
     23          8           0       -6.927533    3.369963   -0.000711
     24          8           0       -8.148004   -1.970575    0.000766
     25          1           0       -7.391704   -2.570572   -0.011415
 ---------------------------------------------------------------------
                    Distance matrix (angstroms):
                    1          2          3          4          5
     1  C    0.000000
     2  C    1.384874   0.000000
     3  C    2.427849   1.402555   0.000000
     4  C    2.821783   2.444446   1.427633   0.000000
     5  C    2.417606   2.790223   2.443337   1.418314   0.000000
     6  C    1.405341   2.412956   2.807066   2.436201   1.380918
     7  H    1.084196   2.146262   3.409389   3.905970   3.396993
     8  H    2.150702   1.083368   2.138355   3.416599   3.873516
     9  H    3.386005   3.874857   3.441083   2.188166   1.085326
    10  H    2.162373   3.395069   3.891389   3.415354   2.135785
    11  C    4.248655   3.741990   2.462106   1.427180   2.494874
    12  C    3.762545   2.480281   1.473081   2.529128   3.808007
    13  C    5.124784   4.273855   2.871319   2.490827   3.799429
    14  C    4.936408   3.794258   2.508560   2.882793   4.300892
    15  C    6.509858   5.690733   4.288209   3.784595   4.966276
    16  C    6.203789   4.962882   3.799744   4.285493   5.703682
    17  C    7.472844   6.483428   5.109722   4.903493   6.187860
    18  H    6.935218   6.292134   4.911438   4.119481   5.083094
    19  C    7.366699   6.202106   4.938855   5.131959   6.523743
    20  H    6.409107   5.074117   4.128958   4.905987   6.300261
    21  H    8.326190   7.108066   5.905029   6.190312   7.590321
    22  Br   9.308178   8.374995   6.988032   6.634295   7.816987
    23  O    4.196645   2.812061   2.372128   3.660387   4.815089
    24  O    5.124158   4.881363   3.717083   2.438783   2.922687
    25  H    4.863582   4.888265   3.925308   2.513615   2.485152
                    6          7          8          9         10
     6  C    0.000000
     7  H    2.162270   0.000000
     8  H    3.402133   2.484995   0.000000
     9  H    2.116575   4.271092   4.958222   0.000000
    10  H    1.084325   2.490509   4.300076   2.421562   0.000000
    11  C    3.753409   5.332845   4.598220   2.762748   4.627886
    12  C    4.279790   4.626009   2.651843   4.709063   5.364061
    13  C    4.926922   6.182133   4.882328   4.182254   5.890303
    14  C    5.135562   5.899073   4.109537   4.963463   6.193165
    15  C    6.198044   7.576672   6.279261   5.130312   7.098273
    16  C    6.510984   7.105781   5.060614   6.345011   7.577323
    17  C    7.339586   8.504259   6.892081   6.449676   8.296168
    18  H    6.410643   8.018441   6.998400   5.014969   7.203495
    19  C    7.499466   8.323109   6.394396   6.994002   8.530767
    20  H    6.930169   7.203842   4.937587   7.054695   8.013409
    21  H    8.532112   9.247833   7.194144   8.075868   9.574798
    22  Br   9.054539  10.357709   8.809666   7.906349   9.951415
    23  O    5.026060   4.848052   2.469531   5.792348   6.087771
    24  O    4.302509   6.187376   5.820698   2.653676   4.955669
    25  H    3.833182   5.876235   5.909196   1.910921   4.318621
                   11         12         13         14         15
    11  C    0.000000
    12  C    2.890002   0.000000
    13  C    1.425768   2.517358   0.000000
    14  C    2.464336   1.470509   1.421300   0.000000
    15  C    2.471413   3.805610   1.416896   2.449570   0.000000
    16  C    3.739764   2.485908   2.435771   1.402858   2.799488
    17  C    3.721339   4.259692   2.412673   2.789303   1.377589
    18  H    2.696171   4.678935   2.165877   3.428805   1.081026
    19  C    4.243561   3.766513   2.817831   2.430330   2.433658
    20  H    4.603883   2.669903   3.411116   2.142817   3.882731
    21  H    5.326214   4.634256   3.900467   3.412824   3.409529
    22  Br   5.323676   6.178414   4.186273   4.708142   2.857245
    23  O    4.131551   1.241549   3.649140   2.369056   4.817776
    24  O    1.349071   4.236898   2.346838   3.656674   2.731141
    25  H    1.937128   4.730301   3.192099   4.393071   3.695638
                   16         17         18         19         20
    16  C    0.000000
    17  C    2.398837   0.000000
    18  H    3.880513   2.144602   0.000000
    19  C    1.383883   1.404772   3.414814   0.000000
    20  H    1.083269   3.387309   4.963756   2.142898   0.000000
    21  H    2.149080   2.166459   4.303238   1.082670   2.480316
    22  Br   4.164078   1.918916   2.967435   2.871829   5.014684
    23  O    2.820766   5.012160   5.771049   4.204282   2.493095
    24  O    4.782281   4.108464   2.389839   4.981360   5.744279
    25  H    5.612904   5.072525   3.312447   5.909898   6.523672
                   21         22         23         24         25
    21  H    0.000000
    22  Br   2.974512   0.000000
    23  O    4.862792   6.894050   0.000000
    24  O    6.035726   5.337306   5.478220   0.000000
    25  H    6.973575   6.275746   5.958651   0.965471   0.000000
 Stoichiometry    C14H8BrO2(2)
 Framework group  C1[X(C14H8BrO2)]
 Deg. of freedom    69
 Full point group                 C1      NOp   1
 Largest Abelian subgroup         C1      NOp   1
 Largest concise Abelian subgroup C1      NOp   1
                         Standard orientation:                         
 ---------------------------------------------------------------------
 Center     Atomic      Atomic             Coordinates (Angstroms)
 Number     Number       Type             X           Y           Z
 ---------------------------------------------------------------------
      1          6           0       -5.075797    0.086122    0.000824
      2          6           0       -4.038945    1.004171    0.001260
      3          6           0       -2.700052    0.586409    0.000678
      4          6           0       -2.399854   -0.809304   -0.000563
      5          6           0       -3.479271   -1.729342   -0.002700
      6          6           0       -4.788263   -1.289488   -0.001421
      7          1           0       -6.105625    0.425142    0.002155
      8          1           0       -4.241539    2.068427    0.001896
      9          1           0       -3.306454   -2.800814   -0.006570
     10          1           0       -5.596176   -2.012699   -0.003060
     11          6           0       -1.035365   -1.227643    0.001410
     12          6           0       -1.631353    1.600238    0.000489
     13          6           0        0.035439   -0.286266    0.000309
     14          6           0       -0.246078    1.106875   -0.000684
     15          6           0        1.383730   -0.721818    0.000497
     16          6           0        0.818843    2.020085   -0.001975
     17          6           0        2.395977    0.212583   -0.000435
     18          1           0        1.603566   -1.780254    0.001862
     19          6           0        2.135152    1.592928   -0.001851
     20          1           0        0.591476    3.079224   -0.003011
     21          1           0        2.948635    2.307365   -0.002404
     22         35           0        4.220630   -0.381453    0.000260
     23          8           0       -1.887580    2.815059    0.001535
     24          8           0       -0.667109   -2.525479    0.000058
     25          1           0       -1.423409   -3.125476    0.012239
 ---------------------------------------------------------------------
 Rotational constants (GHZ):      0.9814279      0.1770341      0.1499801
 Leave Link  202 at Thu Jan 09 21:31:31 2020, MaxMem=   134217728 cpu:         0.0
 (Enter E:\Gaussian\G09W\l301.exe)
 Standard basis: 6-311G(d) (5D, 7F)
 Ernie: Thresh=  0.10000D-02 Tol=  0.10000D-05 Strict=F.
 There are   375 symmetry adapted cartesian basis functions of A   symmetry.
 There are   356 symmetry adapted basis functions of A   symmetry.
   356 basis functions,   642 primitive gaussians,   375 cartesian basis functions
    72 alpha electrons       71 beta electrons
       nuclear repulsion energy      1391.5516095510 Hartrees.
 IExCor=  402 DFT=T Ex+Corr=B3LYP ExCW=0 ScaHFX=  0.200000
 ScaDFX=  0.800000  0.720000  1.000000  0.810000 ScalE2=  1.000000  1.000000
 IRadAn=      0 IRanWt=     -1 IRanGd=            0 ICorTp=0 IEmpDi=141
 NAtoms=   25 NActive=   25 NUniq=   25 SFac= 1.00D+00 NAtFMM=   60 NAOKFM=F Big=F
 Integral buffers will be    262144 words long.
 Raffenetti 2 integral format.
 Two-electron integral symmetry is turned on.
 R6Disp:  Grimme-D3(BJ) Dispersion energy=       -0.0633104424 Hartrees.
 Nuclear repulsion after empirical dispersion term =     1391.4882991087 Hartrees.
 ------------------------------------------------------------------------------
 Polarizable Continuum Model (PCM)
 =================================
 Model                : PCM (using non-symmetric T matrix).
 Atomic radii         : UFF (Universal Force Field).
 Polarization charges : Total charges.
 Charge compensation  : None.
 Solution method      : On-the-fly selection.
 Cavity type          : Scaled VdW (van der Waals Surface) (Alpha=1.100).
 Cavity algorithm     : GePol (No added spheres)
                        Default sphere list used, NSphG=   25.
                        Lebedev-Laikov grids with approx.  5.0 points / Ang**2.
                        Smoothing algorithm: Karplus/York (Gamma=1.0000).
                        Polarization charges: spherical gaussians, with
                                              point-specific exponents (IZeta= 3).
                        Self-potential: point-specific (ISelfS= 7).
                        Self-field    : sphere-specific E.n sum rule (ISelfD= 2).
 1st derivatives      : Analytical E(r).r(x)/FMM algorithm (CHGder, D1EAlg=3).
                        Cavity 1st derivative terms included.
 Solvent              : Acetonitrile, Eps=  35.688000 Eps(inf)=   1.806874
 ------------------------------------------------------------------------------
 GePol: Number of generator spheres                  =      25
 GePol: Total number of spheres                      =      25
 GePol: Number of exposed spheres                    =      25 (100.00%)
 GePol: Number of points                             =    2191
 GePol: Average weight of points                     =       0.13
 GePol: Minimum weight of points                     =   0.10D-11
 GePol: Maximum weight of points                     =    0.20577
 GePol: Number of points with low weight             =     139
 GePol: Fraction of low-weight points (<1% of avg)   =       6.34%
 GePol: Cavity surface area                          =    281.564 Ang**2
 GePol: Cavity volume                                =    308.591 Ang**3
 Leave Link  301 at Thu Jan 09 21:31:33 2020, MaxMem=   134217728 cpu:         2.0
 (Enter E:\Gaussian\G09W\l302.exe)
 NPDir=0 NMtPBC=     1 NCelOv=     1 NCel=       1 NClECP=     1 NCelD=      1
         NCelK=      1 NCelE2=     1 NClLst=     1 CellRange=     0.0.
 One-electron integrals computed using PRISM.
 NBasis=   356 RedAO= T EigKep=  8.62D-05  NBF=   356
 NBsUse=   356 1.00D-06 EigRej= -1.00D+00 NBFU=   356
 Precomputing XC quadrature grid using
 IXCGrd= 4 IRadAn=           0 IRanWt=          -1 IRanGd=           0 AccXCQ= 0.00D+00.
 Generated NRdTot=       0 NPtTot=           0 NUsed=           0 NTot=          16
 NSgBfM=   363   363   364   364   364 MxSgAt=    25 MxSgA2=    25.
 Leave Link  302 at Thu Jan 09 21:31:35 2020, MaxMem=   134217728 cpu:         2.0
 (Enter E:\Gaussian\G09W\l303.exe)
 DipDrv:  MaxL=1.
 Leave Link  303 at Thu Jan 09 21:31:36 2020, MaxMem=   134217728 cpu:         1.0
 (Enter E:\Gaussian\G09W\l401.exe)
 ExpMin= 1.03D-01 ExpMax= 4.40D+05 ExpMxC= 1.51D+04 IAcc=2 IRadAn=         4 AccDes= 0.00D+00
 Harris functional with IExCor=  402 and IRadAn=       4 diagonalized for initial guess.
 HarFok:  IExCor=  402 AccDes= 0.00D+00 IRadAn=         4 IDoV= 1 UseB2=F ITyADJ=14
 ICtDFT=  3500011 ScaDFX=  1.000000  1.000000  1.000000  1.000000
 FoFCou: FMM=F IPFlag=           0 FMFlag=      100000 FMFlg1=           0
         NFxFlg=           0 DoJE=T BraDBF=F KetDBF=T FulRan=T
         wScrn=  0.000000 ICntrl=     500 IOpCl=  0 I1Cent=   200000004 NGrid=           0
         NMat0=    1 NMatS0=      1 NMatT0=    0 NMatD0=    1 NMtDS0=    0 NMtDT0=    0
 Petite list used in FoFCou.
 Harris En= -3263.19537179869    
 JPrj=0 DoOrth=F DoCkMO=F.
 Initial guess <Sx>= 0.0000 <Sy>= 0.0000 <Sz>= 0.5000 <S**2>= 0.7500 S= 0.5000
 Leave Link  401 at Thu Jan 09 21:31:53 2020, MaxMem=   134217728 cpu:        17.0
 (Enter E:\Gaussian\G09W\l502.exe)
 UHF open shell SCF:
 Using DIIS extrapolation, IDIIS=  1040.
 Integral symmetry usage will be decided dynamically.
 IVT=      444890 IEndB=      444890 NGot=   134217728 MDV=   133930479
 LenX=   133930479 LenY=   133789413
 Requested convergence on RMS density matrix=1.00D-08 within 128 cycles.
 Requested convergence on MAX density matrix=1.00D-06.
 Requested convergence on             energy=1.00D-06.
 No special actions if energy rises.
 Fock matrices will be formed incrementally for  20 cycles.

 Cycle   1  Pass 1  IDiag  1:
 FoFJK:  IHMeth= 1 ICntrl=       0 DoSepK=F KAlg= 0 I1Cent=   0 FoldK=F
 IRaf= 780000000 NMat=   1 IRICut=       1 DoRegI=T DoRafI=F ISym2E= 0.
 FoFCou: FMM=F IPFlag=           0 FMFlag=      100000 FMFlg1=           0
         NFxFlg=           0 DoJE=F BraDBF=F KetDBF=F FulRan=T
         wScrn=  0.000000 ICntrl=       0 IOpCl=  1 I1Cent=           0 NGrid=           0
         NMat0=    1 NMatS0=      1 NMatT0=    0 NMatD0=    1 NMtDS0=    0 NMtDT0=    0
 Symmetry not used in FoFCou.
 Inv3:  Mode=1 IEnd=    14401443.
 Iteration    1 A*A^-1 deviation from unit magnitude is 2.44D-15 for   2120.
 Iteration    1 A*A^-1 deviation from orthogonality  is 1.78D-15 for   1301    229.
 Iteration    1 A^-1*A deviation from unit magnitude is 2.22D-15 for   1602.
 Iteration    1 A^-1*A deviation from orthogonality  is 1.53D-13 for   1604   1570.
 E= -3262.75859309633    
 DIIS: error= 9.12D-02 at cycle   1 NSaved=   1.
 NSaved= 1 IEnMin= 1 EnMin= -3262.75859309633     IErMin= 1 ErrMin= 9.12D-02
 ErrMax= 9.12D-02  0.00D+00 EMaxC= 1.00D-01 BMatC= 6.33D+00 BMatP= 6.33D+00
 IDIUse=3 WtCom= 8.79D-02 WtEn= 9.12D-01
 Coeff-Com:  0.100D+01
 Coeff-En:   0.100D+01
 Coeff:      0.100D+01
 Gap=     0.130 Goal=   None    Shift=    0.000
 Gap=     0.153 Goal=   None    Shift=    0.000
 GapD=    0.130 DampG=1.000 DampE=0.500 DampFc=0.5000 IDamp=-1.
 Damping current iteration by 5.00D-01
 RMSDP=8.18D-03 MaxDP=3.38D-01              OVMax= 3.33D-01

 Cycle   2  Pass 1  IDiag  1:
 RMSU=  4.08D-03    CP:  1.02D+00
 E= -3262.89248598137     Delta-E=       -0.133892885045 Rises=F Damp=T
 DIIS: error= 3.45D-02 at cycle   2 NSaved=   2.
 NSaved= 2 IEnMin= 2 EnMin= -3262.89248598137     IErMin= 2 ErrMin= 3.45D-02
 ErrMax= 3.45D-02  0.00D+00 EMaxC= 1.00D-01 BMatC= 9.49D-01 BMatP= 6.33D+00
 IDIUse=3 WtCom= 6.55D-01 WtEn= 3.45D-01
 Coeff-Com: -0.185D+00 0.118D+01
 Coeff-En:   0.222D+00 0.778D+00
 Coeff:     -0.445D-01 0.104D+01
 Gap=     0.235 Goal=   None    Shift=    0.000
 Gap=     0.204 Goal=   None    Shift=    0.000
 RMSDP=3.25D-03 MaxDP=1.39D-01 DE=-1.34D-01 OVMax= 2.69D-01

 Cycle   3  Pass 1  IDiag  1:
 RMSU=  1.50D-03    CP:  1.00D+00  2.98D-01
 E= -3262.97765375318     Delta-E=       -0.085167771805 Rises=F Damp=F
 DIIS: error= 3.51D-02 at cycle   3 NSaved=   3.
 NSaved= 3 IEnMin= 3 EnMin= -3262.97765375318     IErMin= 2 ErrMin= 3.45D-02
 ErrMax= 3.51D-02  0.00D+00 EMaxC= 1.00D-01 BMatC= 7.40D-01 BMatP= 9.49D-01
 IDIUse=3 WtCom= 6.49D-01 WtEn= 3.51D-01
 Coeff-Com: -0.212D+00 0.650D+00 0.562D+00
 Coeff-En:   0.000D+00 0.293D+00 0.707D+00
 Coeff:     -0.138D+00 0.525D+00 0.613D+00
 Gap=     0.118 Goal=   None    Shift=    0.000
 Gap=     0.126 Goal=   None    Shift=    0.000
 RMSDP=3.03D-03 MaxDP=1.32D-01 DE=-8.52D-02 OVMax= 2.23D-01

 Cycle   4  Pass 1  IDiag  1:
 RMSU=  9.26D-04    CP:  1.02D+00  9.48D-01  2.62D-01
 E= -3263.05384051062     Delta-E=       -0.076186757438 Rises=F Damp=F
 DIIS: error= 2.49D-02 at cycle   4 NSaved=   4.
 NSaved= 4 IEnMin= 4 EnMin= -3263.05384051062     IErMin= 4 ErrMin= 2.49D-02
 ErrMax= 2.49D-02  0.00D+00 EMaxC= 1.00D-01 BMatC= 3.40D-01 BMatP= 7.40D-01
 IDIUse=3 WtCom= 7.51D-01 WtEn= 2.49D-01
 Coeff-Com: -0.783D-01 0.201D+00 0.435D+00 0.442D+00
 Coeff-En:   0.000D+00 0.000D+00 0.363D+00 0.637D+00
 Coeff:     -0.588D-01 0.151D+00 0.417D+00 0.491D+00
 Gap=     0.110 Goal=   None    Shift=    0.000
 Gap=     0.145 Goal=   None    Shift=    0.000
 RMSDP=1.65D-03 MaxDP=7.88D-02 DE=-7.62D-02 OVMax= 8.39D-02

 Cycle   5  Pass 1  IDiag  1:
 RMSU=  3.10D-04    CP:  1.01D+00  6.05D-01  6.90D-01  4.62D-01
 E= -3263.12160095615     Delta-E=       -0.067760445538 Rises=F Damp=F
 DIIS: error= 3.56D-03 at cycle   5 NSaved=   5.
 NSaved= 5 IEnMin= 5 EnMin= -3263.12160095615     IErMin= 5 ErrMin= 3.56D-03
 ErrMax= 3.56D-03  0.00D+00 EMaxC= 1.00D-01 BMatC= 1.04D-02 BMatP= 3.40D-01
 IDIUse=3 WtCom= 9.64D-01 WtEn= 3.56D-02
 Coeff-Com: -0.112D-01 0.298D-01 0.149D+00 0.254D+00 0.578D+00
 Coeff-En:   0.000D+00 0.000D+00 0.000D+00 0.000D+00 0.100D+01
 Coeff:     -0.108D-01 0.287D-01 0.144D+00 0.245D+00 0.593D+00
 Gap=     0.109 Goal=   None    Shift=    0.000
 Gap=     0.134 Goal=   None    Shift=    0.000
 RMSDP=2.95D-04 MaxDP=1.37D-02 DE=-6.78D-02 OVMax= 1.67D-02

 Cycle   6  Pass 1  IDiag  1:
 RMSU=  9.60D-05    CP:  1.01D+00  6.59D-01  6.34D-01  5.51D-01  6.19D-01
 E= -3263.12359210148     Delta-E=       -0.001991145328 Rises=F Damp=F
 DIIS: error= 1.43D-03 at cycle   6 NSaved=   6.
 NSaved= 6 IEnMin= 6 EnMin= -3263.12359210148     IErMin= 6 ErrMin= 1.43D-03
 ErrMax= 1.43D-03  0.00D+00 EMaxC= 1.00D-01 BMatC= 1.21D-03 BMatP= 1.04D-02
 IDIUse=3 WtCom= 9.86D-01 WtEn= 1.43D-02
 Coeff-Com:  0.460D-02-0.101D-01 0.135D-01 0.647D-01 0.342D+00 0.586D+00
 Coeff-En:   0.000D+00 0.000D+00 0.000D+00 0.000D+00 0.262D-01 0.974D+00
 Coeff:      0.454D-02-0.994D-02 0.133D-01 0.638D-01 0.337D+00 0.591D+00
 Gap=     0.111 Goal=   None    Shift=    0.000
 Gap=     0.132 Goal=   None    Shift=    0.000
 RMSDP=7.58D-05 MaxDP=3.33D-03 DE=-1.99D-03 OVMax= 9.00D-03

 Cycle   7  Pass 1  IDiag  1:
 RMSU=  3.79D-05    CP:  1.01D+00  6.50D-01  6.45D-01  5.62D-01  7.14D-01
                    CP:  5.90D-01
 E= -3263.12387876122     Delta-E=       -0.000286659742 Rises=F Damp=F
 DIIS: error= 5.48D-04 at cycle   7 NSaved=   7.
 NSaved= 7 IEnMin= 7 EnMin= -3263.12387876122     IErMin= 7 ErrMin= 5.48D-04
 ErrMax= 5.48D-04  0.00D+00 EMaxC= 1.00D-01 BMatC= 1.46D-04 BMatP= 1.21D-03
 IDIUse=3 WtCom= 9.95D-01 WtEn= 5.48D-03
 Coeff-Com:  0.270D-02-0.634D-02-0.670D-02 0.470D-02 0.118D+00 0.307D+00
 Coeff-Com:  0.580D+00
 Coeff-En:   0.000D+00 0.000D+00 0.000D+00 0.000D+00 0.000D+00 0.000D+00
 Coeff-En:   0.100D+01
 Coeff:      0.269D-02-0.630D-02-0.666D-02 0.468D-02 0.117D+00 0.306D+00
 Coeff:      0.583D+00
 Gap=     0.111 Goal=   None    Shift=    0.000
 Gap=     0.133 Goal=   None    Shift=    0.000
 RMSDP=2.22D-05 MaxDP=9.94D-04 DE=-2.87D-04 OVMax= 3.54D-03

 Cycle   8  Pass 1  IDiag  1:
 RMSU=  1.78D-05    CP:  1.01D+00  6.51D-01  6.44D-01  5.61D-01  7.17D-01
                    CP:  7.12D-01  8.80D-01
 E= -3263.12393257899     Delta-E=       -0.000053817766 Rises=F Damp=F
 DIIS: error= 3.25D-04 at cycle   8 NSaved=   8.
 NSaved= 8 IEnMin= 8 EnMin= -3263.12393257899     IErMin= 8 ErrMin= 3.25D-04
 ErrMax= 3.25D-04  0.00D+00 EMaxC= 1.00D-01 BMatC= 3.51D-05 BMatP= 1.46D-04
 IDIUse=3 WtCom= 9.97D-01 WtEn= 3.25D-03
 Coeff-Com:  0.164D-03-0.552D-03-0.566D-02-0.151D-01-0.255D-01-0.955D-02
 Coeff-Com:  0.282D+00 0.775D+00
 Coeff-En:   0.000D+00 0.000D+00 0.000D+00 0.000D+00 0.000D+00 0.000D+00
 Coeff-En:   0.000D+00 0.100D+01
 Coeff:      0.163D-03-0.551D-03-0.564D-02-0.150D-01-0.254D-01-0.952D-02
 Coeff:      0.281D+00 0.775D+00
 Gap=     0.111 Goal=   None    Shift=    0.000
 Gap=     0.133 Goal=   None    Shift=    0.000
 RMSDP=1.87D-05 MaxDP=6.28D-04 DE=-5.38D-05 OVMax= 2.63D-03

 Cycle   9  Pass 1  IDiag  1:
 RMSU=  9.22D-06    CP:  1.01D+00  6.48D-01  6.47D-01  5.59D-01  7.36D-01
                    CP:  7.22D-01  1.13D+00  1.19D+00
 E= -3263.12395578661     Delta-E=       -0.000023207618 Rises=F Damp=F
 DIIS: error= 1.51D-04 at cycle   9 NSaved=   9.
 NSaved= 9 IEnMin= 9 EnMin= -3263.12395578661     IErMin= 9 ErrMin= 1.51D-04
 ErrMax= 1.51D-04  0.00D+00 EMaxC= 1.00D-01 BMatC= 8.95D-06 BMatP= 3.51D-05
 IDIUse=3 WtCom= 9.98D-01 WtEn= 1.51D-03
 Coeff-Com: -0.426D-03 0.977D-03-0.724D-03-0.925D-02-0.557D-01-0.124D+00
 Coeff-Com: -0.959D-01 0.315D+00 0.970D+00
 Coeff-En:   0.000D+00 0.000D+00 0.000D+00 0.000D+00 0.000D+00 0.000D+00
 Coeff-En:   0.000D+00 0.000D+00 0.100D+01
 Coeff:     -0.426D-03 0.975D-03-0.723D-03-0.923D-02-0.556D-01-0.124D+00
 Coeff:     -0.957D-01 0.315D+00 0.970D+00
 Gap=     0.112 Goal=   None    Shift=    0.000
 Gap=     0.133 Goal=   None    Shift=    0.000
 RMSDP=1.38D-05 MaxDP=5.06D-04 DE=-2.32D-05 OVMax= 2.43D-03

 Cycle  10  Pass 1  IDiag  1:
 RMSU=  5.51D-06    CP:  1.01D+00  6.47D-01  6.49D-01  5.58D-01  7.42D-01
                    CP:  7.48D-01  1.35D+00  1.59D+00  1.21D+00
 E= -3263.12396676635     Delta-E=       -0.000010979738 Rises=F Damp=F
 DIIS: error= 7.73D-05 at cycle  10 NSaved=  10.
 NSaved=10 IEnMin=10 EnMin= -3263.12396676635     IErMin=10 ErrMin= 7.73D-05
 ErrMax= 7.73D-05  0.00D+00 EMaxC= 1.00D-01 BMatC= 4.07D-06 BMatP= 8.95D-06
 IDIUse=1 WtCom= 1.00D+00 WtEn= 0.00D+00
 Coeff-Com: -0.550D-03 0.123D-02 0.158D-02-0.178D-02-0.336D-01-0.832D-01
 Coeff-Com: -0.147D+00-0.181D-01 0.606D+00 0.676D+00
 Coeff:     -0.550D-03 0.123D-02 0.158D-02-0.178D-02-0.336D-01-0.832D-01
 Coeff:     -0.147D+00-0.181D-01 0.606D+00 0.676D+00
 Gap=     0.112 Goal=   None    Shift=    0.000
 Gap=     0.133 Goal=   None    Shift=    0.000
 RMSDP=8.14D-06 MaxDP=2.94D-04 DE=-1.10D-05 OVMax= 1.29D-03

 Cycle  11  Pass 1  IDiag  1:
 RMSU=  2.59D-06    CP:  1.01D+00  6.46D-01  6.50D-01  5.59D-01  7.46D-01
                    CP:  7.53D-01  1.45D+00  1.77D+00  1.60D+00  9.80D-01
 E= -3263.12396954508     Delta-E=       -0.000002778736 Rises=F Damp=F
 DIIS: error= 3.15D-05 at cycle  11 NSaved=  11.
 NSaved=11 IEnMin=11 EnMin= -3263.12396954508     IErMin=11 ErrMin= 3.15D-05
 ErrMax= 3.15D-05  0.00D+00 EMaxC= 1.00D-01 BMatC= 6.01D-07 BMatP= 4.07D-06
 IDIUse=1 WtCom= 1.00D+00 WtEn= 0.00D+00
 Coeff-Com: -0.191D-03 0.415D-03 0.611D-03 0.689D-03-0.468D-02-0.108D-01
 Coeff-Com: -0.451D-01-0.554D-01 0.847D-01 0.299D+00 0.731D+00
 Coeff:     -0.191D-03 0.415D-03 0.611D-03 0.689D-03-0.468D-02-0.108D-01
 Coeff:     -0.451D-01-0.554D-01 0.847D-01 0.299D+00 0.731D+00
 Gap=     0.112 Goal=   None    Shift=    0.000
 Gap=     0.133 Goal=   None    Shift=    0.000
 RMSDP=2.53D-06 MaxDP=1.08D-04 DE=-2.78D-06 OVMax= 4.78D-04

 Cycle  12  Pass 1  IDiag  1:
 RMSU=  1.46D-06    CP:  1.01D+00  6.47D-01  6.50D-01  5.59D-01  7.46D-01
                    CP:  7.59D-01  1.46D+00  1.82D+00  1.66D+00  1.17D+00
                    CP:  8.50D-01
 E= -3263.12396994090     Delta-E=       -0.000000395821 Rises=F Damp=F
 DIIS: error= 2.49D-05 at cycle  12 NSaved=  12.
 NSaved=12 IEnMin=12 EnMin= -3263.12396994090     IErMin=12 ErrMin= 2.49D-05
 ErrMax= 2.49D-05  0.00D+00 EMaxC= 1.00D-01 BMatC= 2.16D-07 BMatP= 6.01D-07
 IDIUse=1 WtCom= 1.00D+00 WtEn= 0.00D+00
 Coeff-Com:  0.749D-04-0.154D-03-0.126D-03 0.104D-02 0.799D-02 0.192D-01
 Coeff-Com:  0.152D-01-0.311D-01-0.132D+00-0.321D-01 0.436D+00 0.716D+00
 Coeff:      0.749D-04-0.154D-03-0.126D-03 0.104D-02 0.799D-02 0.192D-01
 Coeff:      0.152D-01-0.311D-01-0.132D+00-0.321D-01 0.436D+00 0.716D+00
 Gap=     0.112 Goal=   None    Shift=    0.000
 Gap=     0.133 Goal=   None    Shift=    0.000
 RMSDP=1.30D-06 MaxDP=5.63D-05 DE=-3.96D-07 OVMax= 2.56D-04

 Cycle  13  Pass 1  IDiag  1:
 RMSU=  6.13D-07    CP:  1.01D+00  6.47D-01  6.50D-01  5.59D-01  7.47D-01
                    CP:  7.62D-01  1.47D+00  1.84D+00  1.71D+00  1.23D+00
                    CP:  1.15D+00  1.12D+00
 E= -3263.12397008515     Delta-E=       -0.000000144249 Rises=F Damp=F
 DIIS: error= 1.11D-05 at cycle  13 NSaved=  13.
 NSaved=13 IEnMin=13 EnMin= -3263.12397008515     IErMin=13 ErrMin= 1.11D-05
 ErrMax= 1.11D-05  0.00D+00 EMaxC= 1.00D-01 BMatC= 3.40D-08 BMatP= 2.16D-07
 IDIUse=1 WtCom= 1.00D+00 WtEn= 0.00D+00
 Coeff-Com:  0.871D-04-0.186D-03-0.156D-03 0.231D-03 0.432D-02 0.941D-02
 Coeff-Com:  0.191D-01 0.383D-02-0.768D-01-0.940D-01-0.490D-02 0.232D+00
 Coeff-Com:  0.907D+00
 Coeff:      0.871D-04-0.186D-03-0.156D-03 0.231D-03 0.432D-02 0.941D-02
 Coeff:      0.191D-01 0.383D-02-0.768D-01-0.940D-01-0.490D-02 0.232D+00
 Coeff:      0.907D+00
 Gap=     0.112 Goal=   None    Shift=    0.000
 Gap=     0.133 Goal=   None    Shift=    0.000
 RMSDP=7.52D-07 MaxDP=3.30D-05 DE=-1.44D-07 OVMax= 1.27D-04

 Cycle  14  Pass 1  IDiag  1:
 RMSU=  3.04D-07    CP:  1.01D+00  6.46D-01  6.50D-01  5.59D-01  7.46D-01
                    CP:  7.62D-01  1.47D+00  1.85D+00  1.73D+00  1.28D+00
                    CP:  1.26D+00  1.37D+00  1.04D+00
 E= -3263.12397011419     Delta-E=       -0.000000029043 Rises=F Damp=F
 DIIS: error= 6.49D-06 at cycle  14 NSaved=  14.
 NSaved=14 IEnMin=14 EnMin= -3263.12397011419     IErMin=14 ErrMin= 6.49D-06
 ErrMax= 6.49D-06  0.00D+00 EMaxC= 1.00D-01 BMatC= 1.52D-08 BMatP= 3.40D-08
 IDIUse=1 WtCom= 1.00D+00 WtEn= 0.00D+00
 Coeff-Com:  0.316D-04-0.719D-04-0.556D-04-0.695D-04 0.108D-02 0.199D-02
 Coeff-Com:  0.975D-02 0.107D-01-0.247D-01-0.589D-01-0.918D-01 0.432D-03
 Coeff-Com:  0.561D+00 0.591D+00
 Coeff:      0.316D-04-0.719D-04-0.556D-04-0.695D-04 0.108D-02 0.199D-02
 Coeff:      0.975D-02 0.107D-01-0.247D-01-0.589D-01-0.918D-01 0.432D-03
 Coeff:      0.561D+00 0.591D+00
 Gap=     0.112 Goal=   None    Shift=    0.000
 Gap=     0.133 Goal=   None    Shift=    0.000
 RMSDP=2.76D-07 MaxDP=1.21D-05 DE=-2.90D-08 OVMax= 5.10D-05

 Cycle  15  Pass 1  IDiag  1:
 RMSU=  1.02D-07    CP:  1.01D+00  6.46D-01  6.50D-01  5.59D-01  7.46D-01
                    CP:  7.62D-01  1.47D+00  1.85D+00  1.74D+00  1.29D+00
                    CP:  1.30D+00  1.43D+00  1.29D+00  8.93D-01
 E= -3263.12397012013     Delta-E=       -0.000000005934 Rises=F Damp=F
 DIIS: error= 1.18D-06 at cycle  15 NSaved=  15.
 NSaved=15 IEnMin=15 EnMin= -3263.12397012013     IErMin=15 ErrMin= 1.18D-06
 ErrMax= 1.18D-06  0.00D+00 EMaxC= 1.00D-01 BMatC= 8.96D-10 BMatP= 1.52D-08
 IDIUse=1 WtCom= 1.00D+00 WtEn= 0.00D+00
 Coeff-Com: -0.640D-05 0.136D-04 0.393D-06-0.424D-04-0.349D-03-0.796D-03
 Coeff-Com: -0.916D-03 0.248D-02 0.553D-02-0.230D-02-0.234D-01-0.260D-01
 Coeff-Com:  0.102D-01 0.122D+00 0.914D+00
 Coeff:     -0.640D-05 0.136D-04 0.393D-06-0.424D-04-0.349D-03-0.796D-03
 Coeff:     -0.916D-03 0.248D-02 0.553D-02-0.230D-02-0.234D-01-0.260D-01
 Coeff:      0.102D-01 0.122D+00 0.914D+00
 Gap=     0.112 Goal=   None    Shift=    0.000
 Gap=     0.133 Goal=   None    Shift=    0.000
 RMSDP=9.27D-08 MaxDP=3.65D-06 DE=-5.93D-09 OVMax= 1.72D-05

 Cycle  16  Pass 1  IDiag  1:
 RMSU=  4.93D-08    CP:  1.01D+00  6.46D-01  6.50D-01  5.59D-01  7.47D-01
                    CP:  7.63D-01  1.48D+00  1.86D+00  1.74D+00  1.29D+00
                    CP:  1.30D+00  1.45D+00  1.31D+00  9.87D-01  1.26D+00
 E= -3263.12397012053     Delta-E=       -0.000000000399 Rises=F Damp=F
 DIIS: error= 5.34D-07 at cycle  16 NSaved=  16.
 NSaved=16 IEnMin=16 EnMin= -3263.12397012053     IErMin=16 ErrMin= 5.34D-07
 ErrMax= 5.34D-07  0.00D+00 EMaxC= 1.00D-01 BMatC= 2.58D-10 BMatP= 8.96D-10
 IDIUse=1 WtCom= 1.00D+00 WtEn= 0.00D+00
 Coeff-Com: -0.682D-05 0.150D-04 0.581D-05-0.867D-05-0.328D-03-0.632D-03
 Coeff-Com: -0.178D-02-0.805D-04 0.586D-02 0.685D-02-0.212D-03-0.140D-01
 Coeff-Com: -0.643D-01-0.130D-01 0.401D+00 0.680D+00
 Coeff:     -0.682D-05 0.150D-04 0.581D-05-0.867D-05-0.328D-03-0.632D-03
 Coeff:     -0.178D-02-0.805D-04 0.586D-02 0.685D-02-0.212D-03-0.140D-01
 Coeff:     -0.643D-01-0.130D-01 0.401D+00 0.680D+00
 Gap=     0.112 Goal=   None    Shift=    0.000
 Gap=     0.133 Goal=   None    Shift=    0.000
 RMSDP=4.42D-08 MaxDP=1.71D-06 DE=-3.99D-10 OVMax= 7.41D-06

 Cycle  17  Pass 1  IDiag  1:
 RMSU=  2.31D-08    CP:  1.01D+00  6.46D-01  6.50D-01  5.59D-01  7.47D-01
                    CP:  7.63D-01  1.48D+00  1.86D+00  1.74D+00  1.30D+00
                    CP:  1.30D+00  1.45D+00  1.32D+00  1.02D+00  1.45D+00
                    CP:  1.03D+00
 E= -3263.12397012063     Delta-E=       -0.000000000101 Rises=F Damp=F
 DIIS: error= 2.47D-07 at cycle  17 NSaved=  17.
 NSaved=17 IEnMin=17 EnMin= -3263.12397012063     IErMin=17 ErrMin= 2.47D-07
 ErrMax= 2.47D-07  0.00D+00 EMaxC= 1.00D-01 BMatC= 7.17D-11 BMatP= 2.58D-10
 IDIUse=1 WtCom= 1.00D+00 WtEn= 0.00D+00
 Coeff-Com: -0.212D-05 0.472D-05 0.441D-05 0.109D-04-0.882D-04-0.105D-03
 Coeff-Com: -0.779D-03-0.845D-03 0.163D-02 0.496D-02 0.762D-02-0.160D-03
 Coeff-Com: -0.406D-01-0.448D-01-0.739D-01 0.383D+00 0.764D+00
 Coeff:     -0.212D-05 0.472D-05 0.441D-05 0.109D-04-0.882D-04-0.105D-03
 Coeff:     -0.779D-03-0.845D-03 0.163D-02 0.496D-02 0.762D-02-0.160D-03
 Coeff:     -0.406D-01-0.448D-01-0.739D-01 0.383D+00 0.764D+00
 Gap=     0.112 Goal=   None    Shift=    0.000
 Gap=     0.133 Goal=   None    Shift=    0.000
 RMSDP=2.85D-08 MaxDP=1.37D-06 DE=-1.01D-10 OVMax= 7.74D-06

 Cycle  18  Pass 1  IDiag  1:
 RMSU=  1.14D-08    CP:  1.01D+00  6.46D-01  6.50D-01  5.59D-01  7.47D-01
                    CP:  7.63D-01  1.48D+00  1.86D+00  1.74D+00  1.30D+00
                    CP:  1.30D+00  1.45D+00  1.32D+00  1.05D+00  1.54D+00
                    CP:  1.35D+00  1.14D+00
 E= -3263.12397012073     Delta-E=       -0.000000000102 Rises=F Damp=F
 DIIS: error= 1.48D-07 at cycle  18 NSaved=  18.
 NSaved=18 IEnMin=18 EnMin= -3263.12397012073     IErMin=18 ErrMin= 1.48D-07
 ErrMax= 1.48D-07  0.00D+00 EMaxC= 1.00D-01 BMatC= 9.60D-12 BMatP= 7.17D-11
 IDIUse=1 WtCom= 1.00D+00 WtEn= 0.00D+00
 Coeff-Com:  0.720D-06-0.152D-05 0.108D-05 0.347D-05 0.465D-04 0.951D-04
 Coeff-Com:  0.167D-03-0.173D-03-0.657D-03-0.531D-03 0.139D-02 0.273D-02
 Coeff-Com:  0.484D-02-0.728D-02-0.974D-01-0.518D-01 0.180D+00 0.969D+00
 Coeff:      0.720D-06-0.152D-05 0.108D-05 0.347D-05 0.465D-04 0.951D-04
 Coeff:      0.167D-03-0.173D-03-0.657D-03-0.531D-03 0.139D-02 0.273D-02
 Coeff:      0.484D-02-0.728D-02-0.974D-01-0.518D-01 0.180D+00 0.969D+00
 Gap=     0.112 Goal=   None    Shift=    0.000
 Gap=     0.133 Goal=   None    Shift=    0.000
 RMSDP=1.35D-08 MaxDP=7.29D-07 DE=-1.02D-10 OVMax= 3.30D-06

 Cycle  19  Pass 1  IDiag  1:
 RMSU=  5.90D-09    CP:  1.01D+00  6.46D-01  6.50D-01  5.59D-01  7.47D-01
                    CP:  7.63D-01  1.48D+00  1.86D+00  1.74D+00  1.30D+00
                    CP:  1.30D+00  1.45D+00  1.32D+00  1.06D+00  1.59D+00
                    CP:  1.48D+00  1.44D+00  1.15D+00
 E= -3263.12397012070     Delta-E=        0.000000000031 Rises=F Damp=F
 DIIS: error= 6.70D-08 at cycle  19 NSaved=  19.
 NSaved=19 IEnMin=18 EnMin= -3263.12397012073     IErMin=19 ErrMin= 6.70D-08
 ErrMax= 6.70D-08  0.00D+00 EMaxC= 1.00D-01 BMatC= 5.24D-12 BMatP= 9.60D-12
 IDIUse=1 WtCom= 1.00D+00 WtEn= 0.00D+00
 Coeff-Com:  0.107D-05-0.230D-05-0.356D-06 0.225D-06 0.534D-04 0.937D-04
 Coeff-Com:  0.280D-03 0.617D-04-0.780D-03-0.143D-02-0.628D-03 0.188D-02
 Coeff-Com:  0.117D-01 0.451D-02-0.506D-01-0.112D+00-0.377D-01 0.615D+00
 Coeff-Com:  0.570D+00
 Coeff:      0.107D-05-0.230D-05-0.356D-06 0.225D-06 0.534D-04 0.937D-04
 Coeff:      0.280D-03 0.617D-04-0.780D-03-0.143D-02-0.628D-03 0.188D-02
 Coeff:      0.117D-01 0.451D-02-0.506D-01-0.112D+00-0.377D-01 0.615D+00
 Coeff:      0.570D+00
 Gap=     0.112 Goal=   None    Shift=    0.000
 Gap=     0.133 Goal=   None    Shift=    0.000
 RMSDP=5.32D-09 MaxDP=2.72D-07 DE= 3.09D-11 OVMax= 1.65D-06

 Error on total polarization charges =  0.01435
 SCF Done:  E(UB3LYP) =  -3263.12397012     A.U. after   19 cycles
            NFock= 19  Conv=0.53D-08     -V/T= 2.0018
 <Sx>= 0.0000 <Sy>= 0.0000 <Sz>= 0.5000 <S**2>= 0.7732 S= 0.5116
 <L.S>= 0.000000000000E+00
 KE= 3.257364070517D+03 PE=-1.054125035772D+04 EE= 2.629274017972D+03
 Annihilation of the first spin contaminant:
 S**2 before annihilation     0.7732,   after     0.7504
 Leave Link  502 at Thu Jan 09 21:57:40 2020, MaxMem=   134217728 cpu:      1547.0
 (Enter E:\Gaussian\G09W\l601.exe)
 Copying SCF densities to generalized density rwf, IOpCl= 1 IROHF=0.

 **********************************************************************

            Population analysis using the SCF density.

 **********************************************************************

 Orbital symmetries:
 Alpha Orbitals:
       Occupied  (A) (A) (A) (A) (A) (A) (A) (A) (A) (A) (A) (A)
                 (A) (A) (A) (A) (A) (A) (A) (A) (A) (A) (A) (A)
                 (A) (A) (A) (A) (A) (A) (A) (A) (A) (A) (A) (A)
                 (A) (A) (A) (A) (A) (A) (A) (A) (A) (A) (A) (A)
                 (A) (A) (A) (A) (A) (A) (A) (A) (A) (A) (A) (A)
                 (A) (A) (A) (A) (A) (A) (A) (A) (A) (A) (A) (A)
       Virtual   (A) (A) (A) (A) (A) (A) (A) (A) (A) (A) (A) (A)
                 (A) (A) (A) (A) (A) (A) (A) (A) (A) (A) (A) (A)
                 (A) (A) (A) (A) (A) (A) (A) (A) (A) (A) (A) (A)
                 (A) (A) (A) (A) (A) (A) (A) (A) (A) (A) (A) (A)
                 (A) (A) (A) (A) (A) (A) (A) (A) (A) (A) (A) (A)
                 (A) (A) (A) (A) (A) (A) (A) (A) (A) (A) (A) (A)
                 (A) (A) (A) (A) (A) (A) (A) (A) (A) (A) (A) (A)
                 (A) (A) (A) (A) (A) (A) (A) (A) (A) (A) (A) (A)
                 (A) (A) (A) (A) (A) (A) (A) (A) (A) (A) (A) (A)
                 (A) (A) (A) (A) (A) (A) (A) (A) (A) (A) (A) (A)
                 (A) (A) (A) (A) (A) (A) (A) (A) (A) (A) (A) (A)
                 (A) (A) (A) (A) (A) (A) (A) (A) (A) (A) (A) (A)
                 (A) (A) (A) (A) (A) (A) (A) (A) (A) (A) (A) (A)
                 (A) (A) (A) (A) (A) (A) (A) (A) (A) (A) (A) (A)
                 (A) (A) (A) (A) (A) (A) (A) (A) (A) (A) (A) (A)
                 (A) (A) (A) (A) (A) (A) (A) (A) (A) (A) (A) (A)
                 (A) (A) (A) (A) (A) (A) (A) (A) (A) (A) (A) (A)
                 (A) (A) (A) (A) (A) (A) (A) (A) (A) (A) (A) (A)
                 (A) (A) (A) (A) (A) (A) (A) (A) (A) (A) (A) (A)
                 (A) (A) (A) (A) (A) (A) (A) (A) (A) (A) (A) (A)
                 (A) (A) (A) (A) (A) (A) (A) (A) (A) (A) (A) (A)
                 (A) (A) (A) (A) (A) (A) (A) (A) (A) (A) (A) (A)
                 (A) (A) (A) (A) (A) (A) (A) (A) (A) (A) (A) (A)
                 (A) (A) (A) (A) (A) (A) (A) (A)
 Beta  Orbitals:
       Occupied  (A) (A) (A) (A) (A) (A) (A) (A) (A) (A) (A) (A)
                 (A) (A) (A) (A) (A) (A) (A) (A) (A) (A) (A) (A)
                 (A) (A) (A) (A) (A) (A) (A) (A) (A) (A) (A) (A)
                 (A) (A) (A) (A) (A) (A) (A) (A) (A) (A) (A) (A)
                 (A) (A) (A) (A) (A) (A) (A) (A) (A) (A) (A) (A)
                 (A) (A) (A) (A) (A) (A) (A) (A) (A) (A) (A)
       Virtual   (A) (A) (A) (A) (A) (A) (A) (A) (A) (A) (A) (A)
                 (A) (A) (A) (A) (A) (A) (A) (A) (A) (A) (A) (A)
                 (A) (A) (A) (A) (A) (A) (A) (A) (A) (A) (A) (A)
                 (A) (A) (A) (A) (A) (A) (A) (A) (A) (A) (A) (A)
                 (A) (A) (A) (A) (A) (A) (A) (A) (A) (A) (A) (A)
                 (A) (A) (A) (A) (A) (A) (A) (A) (A) (A) (A) (A)
                 (A) (A) (A) (A) (A) (A) (A) (A) (A) (A) (A) (A)
                 (A) (A) (A) (A) (A) (A) (A) (A) (A) (A) (A) (A)
                 (A) (A) (A) (A) (A) (A) (A) (A) (A) (A) (A) (A)
                 (A) (A) (A) (A) (A) (A) (A) (A) (A) (A) (A) (A)
                 (A) (A) (A) (A) (A) (A) (A) (A) (A) (A) (A) (A)
                 (A) (A) (A) (A) (A) (A) (A) (A) (A) (A) (A) (A)
                 (A) (A) (A) (A) (A) (A) (A) (A) (A) (A) (A) (A)
                 (A) (A) (A) (A) (A) (A) (A) (A) (A) (A) (A) (A)
                 (A) (A) (A) (A) (A) (A) (A) (A) (A) (A) (A) (A)
                 (A) (A) (A) (A) (A) (A) (A) (A) (A) (A) (A) (A)
                 (A) (A) (A) (A) (A) (A) (A) (A) (A) (A) (A) (A)
                 (A) (A) (A) (A) (A) (A) (A) (A) (A) (A) (A) (A)
                 (A) (A) (A) (A) (A) (A) (A) (A) (A) (A) (A) (A)
                 (A) (A) (A) (A) (A) (A) (A) (A) (A) (A) (A) (A)
                 (A) (A) (A) (A) (A) (A) (A) (A) (A) (A) (A) (A)
                 (A) (A) (A) (A) (A) (A) (A) (A) (A) (A) (A) (A)
                 (A) (A) (A) (A) (A) (A) (A) (A) (A) (A) (A) (A)
                 (A) (A) (A) (A) (A) (A) (A) (A) (A)
 The electronic state is 2-A.
 Alpha  occ. eigenvalues -- -482.84003 -62.49300 -56.31332 -56.30951 -56.30934
 Alpha  occ. eigenvalues --  -19.18507 -19.10454 -10.27337 -10.25901 -10.24757
 Alpha  occ. eigenvalues --  -10.21195 -10.21179 -10.20188 -10.20116 -10.20056
 Alpha  occ. eigenvalues --  -10.20034 -10.20021 -10.19633 -10.19378 -10.19147
 Alpha  occ. eigenvalues --  -10.19050  -8.70268  -6.53402  -6.52132  -6.52089
 Alpha  occ. eigenvalues --   -2.64498  -2.64138  -2.64108  -2.63098  -2.63098
 Alpha  occ. eigenvalues --   -1.10438  -1.03763  -0.90219  -0.88368  -0.83813
 Alpha  occ. eigenvalues --   -0.80525  -0.78224  -0.77872  -0.75059  -0.71845
 Alpha  occ. eigenvalues --   -0.66403  -0.64827  -0.62446  -0.60985  -0.57544
 Alpha  occ. eigenvalues --   -0.56294  -0.53751  -0.49590  -0.48955  -0.48176
 Alpha  occ. eigenvalues --   -0.47347  -0.46444  -0.45930  -0.45312  -0.44212
 Alpha  occ. eigenvalues --   -0.43033  -0.42307  -0.40698  -0.40039  -0.39809
 Alpha  occ. eigenvalues --   -0.37644  -0.37595  -0.36709  -0.36209  -0.33123
 Alpha  occ. eigenvalues --   -0.30495  -0.30392  -0.28246  -0.27918  -0.26772
 Alpha  occ. eigenvalues --   -0.26354  -0.18995
 Alpha virt. eigenvalues --   -0.07812  -0.04295  -0.02434  -0.01670   0.02609
 Alpha virt. eigenvalues --    0.02626   0.04057   0.06095   0.07342   0.08744
 Alpha virt. eigenvalues --    0.10062   0.11508   0.12432   0.12563   0.15792
 Alpha virt. eigenvalues --    0.18207   0.19174   0.20640   0.21042   0.22421
 Alpha virt. eigenvalues --    0.24041   0.24539   0.25373   0.26741   0.27025
 Alpha virt. eigenvalues --    0.28204   0.28212   0.28673   0.29645   0.30497
 Alpha virt. eigenvalues --    0.31756   0.34657   0.34910   0.35424   0.36349
 Alpha virt. eigenvalues --    0.37096   0.37574   0.37789   0.38192   0.39402
 Alpha virt. eigenvalues --    0.40274   0.40707   0.40714   0.41253   0.41918
 Alpha virt. eigenvalues --    0.42994   0.43429   0.44357   0.44690   0.44973
 Alpha virt. eigenvalues --    0.45520   0.46009   0.46501   0.47795   0.48356
 Alpha virt. eigenvalues --    0.51501   0.52325   0.53512   0.53937   0.55400
 Alpha virt. eigenvalues --    0.56382   0.56534   0.58681   0.58903   0.59292
 Alpha virt. eigenvalues --    0.60098   0.60341   0.61164   0.61756   0.62763
 Alpha virt. eigenvalues --    0.63056   0.65023   0.65261   0.65867   0.67201
 Alpha virt. eigenvalues --    0.70958   0.70997   0.71712   0.72008   0.72205
 Alpha virt. eigenvalues --    0.74431   0.75443   0.76362   0.78438   0.79221
 Alpha virt. eigenvalues --    0.80403   0.80941   0.81542   0.83125   0.83472
 Alpha virt. eigenvalues --    0.84340   0.86737   0.87513   0.90178   0.91537
 Alpha virt. eigenvalues --    0.91783   0.93005   0.95628   0.96991   0.97535
 Alpha virt. eigenvalues --    0.98315   0.99101   0.99772   1.00667   1.03606
 Alpha virt. eigenvalues --    1.04378   1.09272   1.09396   1.09784   1.10368
 Alpha virt. eigenvalues --    1.11331   1.12430   1.14341   1.14854   1.15821
 Alpha virt. eigenvalues --    1.16113   1.19243   1.20012   1.23023   1.23367
 Alpha virt. eigenvalues --    1.25356   1.26794   1.27432   1.29227   1.30664
 Alpha virt. eigenvalues --    1.32836   1.39250   1.42081   1.44076   1.45097
 Alpha virt. eigenvalues --    1.46389   1.47461   1.47838   1.49220   1.52394
 Alpha virt. eigenvalues --    1.53474   1.56038   1.57150   1.57461   1.61025
 Alpha virt. eigenvalues --    1.64939   1.66626   1.67682   1.70100   1.72167
 Alpha virt. eigenvalues --    1.74709   1.77570   1.77744   1.78725   1.80799
 Alpha virt. eigenvalues --    1.82343   1.83704   1.84257   1.84502   1.85159
 Alpha virt. eigenvalues --    1.86505   1.87663   1.88599   1.88672   1.90906
 Alpha virt. eigenvalues --    1.91184   1.91685   1.92717   1.94696   1.95814
 Alpha virt. eigenvalues --    1.97985   2.01199   2.05813   2.08479   2.10536
 Alpha virt. eigenvalues --    2.15271   2.18416   2.18916   2.20160   2.24719
 Alpha virt. eigenvalues --    2.26348   2.27278   2.30522   2.32185   2.32818
 Alpha virt. eigenvalues --    2.33963   2.35319   2.35367   2.36745   2.40677
 Alpha virt. eigenvalues --    2.46897   2.46966   2.50174   2.51697   2.55214
 Alpha virt. eigenvalues --    2.57125   2.57243   2.58152   2.65017   2.66248
 Alpha virt. eigenvalues --    2.68803   2.71693   2.73561   2.75923   2.76720
 Alpha virt. eigenvalues --    2.79881   2.81250   2.81770   2.81833   2.87860
 Alpha virt. eigenvalues --    2.88179   2.92903   2.97613   2.97963   3.01904
 Alpha virt. eigenvalues --    3.03249   3.04908   3.07204   3.08183   3.12999
 Alpha virt. eigenvalues --    3.13765   3.17277   3.18957   3.21000   3.23401
 Alpha virt. eigenvalues --    3.25914   3.26984   3.27425   3.29138   3.30495
 Alpha virt. eigenvalues --    3.30507   3.32581   3.36740   3.36959   3.38902
 Alpha virt. eigenvalues --    3.44240   3.44966   3.49382   3.53013   3.53675
 Alpha virt. eigenvalues --    3.55821   3.66889   3.68146   3.74442   3.81694
 Alpha virt. eigenvalues --    3.91884   3.94554   4.10987   4.12259   4.12922
 Alpha virt. eigenvalues --    4.16156   4.20305   4.36217   4.38106   4.53829
 Alpha virt. eigenvalues --    4.74977   4.77305   4.78327   4.79780   4.88796
 Alpha virt. eigenvalues --    5.08419   5.13279   5.53515   5.68446   6.47282
 Alpha virt. eigenvalues --    7.45423   7.52796   7.62311  23.16966  23.36250
 Alpha virt. eigenvalues --   23.72638  23.75546  23.76749  23.85852  23.87451
 Alpha virt. eigenvalues --   23.90064  23.97192  23.99873  24.03000  24.03457
 Alpha virt. eigenvalues --   24.10744  24.12005  47.76442  49.87016  49.98038
 Alpha virt. eigenvalues --  289.65332 289.72615 289.843841020.51296
  Beta  occ. eigenvalues -- -482.84004 -62.49301 -56.31332 -56.30953 -56.30934
  Beta  occ. eigenvalues --  -19.18181 -19.09963 -10.26705 -10.25910 -10.24832
  Beta  occ. eigenvalues --  -10.21313 -10.21281 -10.20033 -10.19945 -10.19877
  Beta  occ. eigenvalues --  -10.19866 -10.19853 -10.19706 -10.19457 -10.19140
  Beta  occ. eigenvalues --  -10.18953  -8.70269  -6.53402  -6.52137  -6.52090
  Beta  occ. eigenvalues --   -2.64498  -2.64140  -2.64107  -2.63101  -2.63100
  Beta  occ. eigenvalues --   -1.09724  -1.02941  -0.89952  -0.88194  -0.83557
  Beta  occ. eigenvalues --   -0.80243  -0.77933  -0.77653  -0.74858  -0.71012
  Beta  occ. eigenvalues --   -0.66300  -0.64541  -0.62313  -0.60795  -0.57359
  Beta  occ. eigenvalues --   -0.56071  -0.53531  -0.49376  -0.48862  -0.47922
  Beta  occ. eigenvalues --   -0.47268  -0.45795  -0.45257  -0.44710  -0.44066
  Beta  occ. eigenvalues --   -0.42749  -0.40522  -0.40425  -0.39704  -0.39621
  Beta  occ. eigenvalues --   -0.37550  -0.36714  -0.36587  -0.36069  -0.32467
  Beta  occ. eigenvalues --   -0.30384  -0.29365  -0.27615  -0.26917  -0.26296
  Beta  occ. eigenvalues --   -0.25797
  Beta virt. eigenvalues --   -0.12475  -0.06771  -0.03410  -0.02016  -0.01723
  Beta virt. eigenvalues --    0.02768   0.04334   0.05129   0.06131   0.07379
  Beta virt. eigenvalues --    0.08783   0.10102   0.11581   0.12599   0.13045
  Beta virt. eigenvalues --    0.15911   0.18638   0.20146   0.20837   0.21407
  Beta virt. eigenvalues --    0.22602   0.24156   0.24662   0.25493   0.26777
  Beta virt. eigenvalues --    0.27123   0.28299   0.28313   0.28743   0.29903
  Beta virt. eigenvalues --    0.30675   0.31892   0.34883   0.35414   0.35625
  Beta virt. eigenvalues --    0.36637   0.37297   0.37721   0.37957   0.38394
  Beta virt. eigenvalues --    0.40037   0.40496   0.40792   0.41045   0.41399
  Beta virt. eigenvalues --    0.42075   0.43263   0.43596   0.44414   0.44889
  Beta virt. eigenvalues --    0.45147   0.45677   0.46104   0.46674   0.48261
  Beta virt. eigenvalues --    0.48586   0.51589   0.52637   0.53764   0.54421
  Beta virt. eigenvalues --    0.55441   0.56475   0.56731   0.58747   0.59233
  Beta virt. eigenvalues --    0.59316   0.60201   0.60501   0.61332   0.61921
  Beta virt. eigenvalues --    0.62825   0.63114   0.65113   0.65486   0.66101
  Beta virt. eigenvalues --    0.67298   0.71139   0.71199   0.71892   0.72186
  Beta virt. eigenvalues --    0.72471   0.74589   0.75517   0.76547   0.78536
  Beta virt. eigenvalues --    0.79319   0.80518   0.81024   0.81714   0.83533
  Beta virt. eigenvalues --    0.84106   0.84456   0.86893   0.87649   0.90248
  Beta virt. eigenvalues --    0.91660   0.92868   0.93640   0.95823   0.97311
  Beta virt. eigenvalues --    0.97684   0.98440   0.99182   1.00059   1.00911
  Beta virt. eigenvalues --    1.03699   1.04443   1.09635   1.09740   1.10309
  Beta virt. eigenvalues --    1.10502   1.11732   1.12573   1.14534   1.15619
  Beta virt. eigenvalues --    1.16277   1.16427   1.19532   1.20322   1.23134
  Beta virt. eigenvalues --    1.23732   1.25428   1.26996   1.27568   1.29353
  Beta virt. eigenvalues --    1.30813   1.33268   1.39323   1.42154   1.44239
  Beta virt. eigenvalues --    1.45240   1.46490   1.47588   1.48394   1.50083
  Beta virt. eigenvalues --    1.52527   1.53912   1.56324   1.57334   1.57875
  Beta virt. eigenvalues --    1.61467   1.65229   1.67076   1.67880   1.70280
  Beta virt. eigenvalues --    1.72419   1.74908   1.77878   1.78029   1.78851
  Beta virt. eigenvalues --    1.81166   1.82619   1.84088   1.84572   1.84967
  Beta virt. eigenvalues --    1.85503   1.86631   1.87894   1.88957   1.88978
  Beta virt. eigenvalues --    1.91258   1.91314   1.91857   1.93016   1.94781
  Beta virt. eigenvalues --    1.95920   1.97974   2.01715   2.05930   2.08595
  Beta virt. eigenvalues --    2.10658   2.15327   2.18641   2.19418   2.20410
  Beta virt. eigenvalues --    2.24781   2.26422   2.27372   2.30690   2.32541
  Beta virt. eigenvalues --    2.33160   2.34092   2.35485   2.35748   2.36907
  Beta virt. eigenvalues --    2.40762   2.47026   2.47656   2.50270   2.51984
  Beta virt. eigenvalues --    2.55301   2.57289   2.58031   2.58855   2.65365
  Beta virt. eigenvalues --    2.66358   2.69168   2.71804   2.74014   2.76785
  Beta virt. eigenvalues --    2.76829   2.80215   2.81889   2.82046   2.82357
  Beta virt. eigenvalues --    2.88153   2.89221   2.94064   2.97976   2.98161
  Beta virt. eigenvalues --    3.02464   3.03567   3.05490   3.07465   3.08585
  Beta virt. eigenvalues --    3.13930   3.14316   3.17474   3.18998   3.21239
  Beta virt. eigenvalues --    3.23543   3.25979   3.27091   3.27563   3.29228
  Beta virt. eigenvalues --    3.30558   3.31743   3.32644   3.36844   3.37122
  Beta virt. eigenvalues --    3.39093   3.44353   3.45160   3.49565   3.53241
  Beta virt. eigenvalues --    3.53829   3.56056   3.67039   3.68396   3.74625
  Beta virt. eigenvalues --    3.81943   3.92016   3.94732   4.11252   4.12472
  Beta virt. eigenvalues --    4.12917   4.16161   4.20299   4.36231   4.38453
  Beta virt. eigenvalues --    4.53829   4.75167   4.77440   4.79722   4.80232
  Beta virt. eigenvalues --    4.90880   5.08823   5.13549   5.53954   5.68836
  Beta virt. eigenvalues --    6.47279   7.45414   7.52795   7.62312  23.17056
  Beta virt. eigenvalues --   23.36311  23.72918  23.75603  23.76813  23.85899
  Beta virt. eigenvalues --   23.87509  23.90414  23.97233  23.99977  24.03053
  Beta virt. eigenvalues --   24.03503  24.10795  24.12057  47.76440  49.87337
  Beta virt. eigenvalues --   49.98531 289.65329 289.72614 289.843851020.51295
          Condensed to atoms (all electrons):
               1          2          3          4          5          6
     1  C    5.004503   0.492193  -0.039330  -0.039701  -0.048925   0.487639
     2  C    0.492193   5.138410   0.374900  -0.092900  -0.059864  -0.030144
     3  C   -0.039330   0.374900   5.540411   0.457767  -0.047879  -0.047665
     4  C   -0.039701  -0.092900   0.457767   5.434280   0.367310  -0.034624
     5  C   -0.048925  -0.059864  -0.047879   0.367310   5.118505   0.538612
     6  C    0.487639  -0.030144  -0.047665  -0.034624   0.538612   4.928004
     7  H    0.400302  -0.043822   0.007750  -0.000073   0.007268  -0.043497
     8  H   -0.040215   0.402892  -0.069971   0.005489  -0.001279   0.007159
     9  H    0.006127  -0.000197   0.001872  -0.079248   0.392662  -0.017821
    10  H   -0.042459   0.005841   0.000359   0.006234  -0.038996   0.398088
    11  C   -0.001453   0.014550   0.027424   0.192450  -0.040260   0.013244
    12  C    0.012770  -0.070877   0.168742   0.022841   0.008250  -0.001977
    13  C    0.000337  -0.004044  -0.110934  -0.093372   0.018748  -0.000209
    14  C   -0.000691   0.036033  -0.049747  -0.124126  -0.001703   0.000396
    15  C    0.000004   0.000070  -0.002730   0.026060  -0.001304  -0.000012
    16  C   -0.000014  -0.001259   0.037600  -0.005033   0.000029   0.000006
    17  C    0.000000   0.000006   0.000425  -0.000564  -0.000002   0.000000
    18  H    0.000000  -0.000003  -0.000098   0.002138  -0.000078  -0.000003
    19  C    0.000000  -0.000013  -0.000653   0.000341   0.000002   0.000000
    20  H   -0.000005  -0.000214   0.004644  -0.000186   0.000003   0.000000
    21  H    0.000000   0.000000  -0.000022   0.000010   0.000000   0.000000
    22  Br   0.000000   0.000000   0.000001  -0.000006   0.000000   0.000000
    23  O    0.001420   0.022235  -0.168990   0.006595   0.000005  -0.000010
    24  O   -0.000025  -0.000062   0.001003  -0.114370   0.004196   0.001236
    25  H   -0.000013   0.000055   0.000679  -0.013481   0.011103   0.000521
               7          8          9         10         11         12
     1  C    0.400302  -0.040215   0.006127  -0.042459  -0.001453   0.012770
     2  C   -0.043822   0.402892  -0.000197   0.005841   0.014550  -0.070877
     3  C    0.007750  -0.069971   0.001872   0.000359   0.027424   0.168742
     4  C   -0.000073   0.005489  -0.079248   0.006234   0.192450   0.022841
     5  C    0.007268  -0.001279   0.392662  -0.038996  -0.040260   0.008250
     6  C   -0.043497   0.007159  -0.017821   0.398088   0.013244  -0.001977
     7  H    0.461764  -0.006593  -0.000339  -0.005488  -0.000008  -0.000326
     8  H   -0.006593   0.468649   0.000091  -0.000262   0.000158  -0.010997
     9  H   -0.000339   0.000091   0.472355  -0.006589   0.005860  -0.000041
    10  H   -0.005488  -0.000262  -0.006589   0.459761  -0.000514   0.000038
    11  C   -0.000008   0.000158   0.005860  -0.000514   5.051221  -0.071888
    12  C   -0.000326  -0.010997  -0.000041   0.000038  -0.071888   4.818583
    13  C    0.000006  -0.000283   0.001978  -0.000010   0.320809   0.024401
    14  C   -0.000019   0.004839  -0.000065   0.000007  -0.016939   0.172447
    15  C    0.000000   0.000000  -0.000081   0.000000  -0.052540   0.006897
    16  C    0.000000  -0.000217  -0.000007   0.000000   0.019043  -0.075908
    17  C    0.000000   0.000001  -0.000001   0.000000   0.010042  -0.001308
    18  H    0.000000  -0.000001  -0.000025   0.000000  -0.012532  -0.000081
    19  C    0.000000  -0.000005   0.000000   0.000000  -0.000564   0.012175
    20  H    0.000000  -0.000098   0.000000   0.000000  -0.000132  -0.008379
    21  H    0.000000   0.000000   0.000000   0.000000   0.000034  -0.000311
    22  Br   0.000000   0.000000   0.000000   0.000000  -0.000460   0.000022
    23  O   -0.000051   0.026100   0.000005   0.000000  -0.001919   0.760919
    24  O    0.000000   0.000003  -0.000704  -0.000004   0.397737   0.000082
    25  H   -0.000001   0.000000   0.007149   0.000027  -0.045658  -0.000131
              13         14         15         16         17         18
     1  C    0.000337  -0.000691   0.000004  -0.000014   0.000000   0.000000
     2  C   -0.004044   0.036033   0.000070  -0.001259   0.000006  -0.000003
     3  C   -0.110934  -0.049747  -0.002730   0.037600   0.000425  -0.000098
     4  C   -0.093372  -0.124126   0.026060  -0.005033  -0.000564   0.002138
     5  C    0.018748  -0.001703  -0.001304   0.000029  -0.000002  -0.000078
     6  C   -0.000209   0.000396  -0.000012   0.000006   0.000000  -0.000003
     7  H    0.000006  -0.000019   0.000000   0.000000   0.000000   0.000000
     8  H   -0.000283   0.004839   0.000000  -0.000217   0.000001  -0.000001
     9  H    0.001978  -0.000065  -0.000081  -0.000007  -0.000001  -0.000025
    10  H   -0.000010   0.000007   0.000000   0.000000   0.000000   0.000000
    11  C    0.320809  -0.016939  -0.052540   0.019043   0.010042  -0.012532
    12  C    0.024401   0.172447   0.006897  -0.075908  -0.001308  -0.000081
    13  C    5.280138   0.469418   0.382823  -0.095487  -0.016639  -0.039292
    14  C    0.469418   5.620764  -0.092434   0.359266  -0.047658   0.005297
    15  C    0.382823  -0.092434   5.155296  -0.055379   0.470585   0.399489
    16  C   -0.095487   0.359266  -0.055379   5.145569  -0.018630  -0.000791
    17  C   -0.016639  -0.047658   0.470585  -0.018630   5.103301  -0.051245
    18  H   -0.039292   0.005297   0.399489  -0.000791  -0.051245   0.440948
    19  C   -0.037038  -0.040371  -0.043721   0.484583   0.439784   0.006131
    20  H    0.004188  -0.068195  -0.000535   0.400914   0.006821   0.000074
    21  H   -0.000205   0.007303   0.006433  -0.037661  -0.050765  -0.000161
    22  Br   0.009387  -0.000121  -0.087283   0.007914   0.283667  -0.005127
    23  O    0.006373  -0.171064  -0.000001   0.023644  -0.000018   0.000004
    24  O   -0.105637   0.004332   0.015891  -0.000129   0.000452   0.015143
    25  H    0.006433  -0.000169  -0.000441   0.000039   0.000064  -0.000691
              19         20         21         22         23         24
     1  C    0.000000  -0.000005   0.000000   0.000000   0.001420  -0.000025
     2  C   -0.000013  -0.000214   0.000000   0.000000   0.022235  -0.000062
     3  C   -0.000653   0.004644  -0.000022   0.000001  -0.168990   0.001003
     4  C    0.000341  -0.000186   0.000010  -0.000006   0.006595  -0.114370
     5  C    0.000002   0.000003   0.000000   0.000000   0.000005   0.004196
     6  C    0.000000   0.000000   0.000000   0.000000  -0.000010   0.001236
     7  H    0.000000   0.000000   0.000000   0.000000  -0.000051   0.000000
     8  H   -0.000005  -0.000098   0.000000   0.000000   0.026100   0.000003
     9  H    0.000000   0.000000   0.000000   0.000000   0.000005  -0.000704
    10  H    0.000000   0.000000   0.000000   0.000000   0.000000  -0.000004
    11  C   -0.000564  -0.000132   0.000034  -0.000460  -0.001919   0.397737
    12  C    0.012175  -0.008379  -0.000311   0.000022   0.760919   0.000082
    13  C   -0.037038   0.004188  -0.000205   0.009387   0.006373  -0.105637
    14  C   -0.040371  -0.068195   0.007303  -0.000121  -0.171064   0.004332
    15  C   -0.043721  -0.000535   0.006433  -0.087283  -0.000001   0.015891
    16  C    0.484583   0.400914  -0.037661   0.007914   0.023644  -0.000129
    17  C    0.439784   0.006821  -0.050765   0.283667  -0.000018   0.000452
    18  H    0.006131   0.000074  -0.000161  -0.005127   0.000004   0.015143
    19  C    5.046714  -0.038371   0.401572  -0.078958   0.001513   0.000046
    20  H   -0.038371   0.460787  -0.006383  -0.000254   0.024971   0.000001
    21  H    0.401572  -0.006383   0.446118  -0.004663  -0.000046   0.000000
    22  Br  -0.078958  -0.000254  -0.004663  34.906616   0.000000  -0.000023
    23  O    0.001513   0.024971  -0.000046   0.000000   7.841134   0.000000
    24  O    0.000046   0.000001   0.000000  -0.000023   0.000000   8.048600
    25  H   -0.000001  -0.000001   0.000000   0.000001  -0.000001   0.276804
              25
     1  C   -0.000013
     2  C    0.000055
     3  C    0.000679
     4  C   -0.013481
     5  C    0.011103
     6  C    0.000521
     7  H   -0.000001
     8  H    0.000000
     9  H    0.007149
    10  H    0.000027
    11  C   -0.045658
    12  C   -0.000131
    13  C    0.006433
    14  C   -0.000169
    15  C   -0.000441
    16  C    0.000039
    17  C    0.000064
    18  H   -0.000691
    19  C   -0.000001
    20  H   -0.000001
    21  H    0.000000
    22  Br   0.000001
    23  O   -0.000001
    24  O    0.276804
    25  H    0.318280
          Atomic-Atomic Spin Densities.
               1          2          3          4          5          6
     1  C    0.146478   0.014375  -0.009112   0.002269  -0.008200  -0.010869
     2  C    0.014375  -0.062155  -0.013054   0.003906  -0.000718  -0.000708
     3  C   -0.009112  -0.013054   0.159705  -0.020252   0.007274   0.002274
     4  C    0.002269   0.003906  -0.020252  -0.095633  -0.013390  -0.000386
     5  C   -0.008200  -0.000718   0.007274  -0.013390   0.146593   0.011453
     6  C   -0.010869  -0.000708   0.002274  -0.000386   0.011453  -0.067013
     7  H   -0.000579  -0.000181   0.000017  -0.000055  -0.000018   0.000214
     8  H   -0.000484   0.000769   0.001308  -0.000035   0.000040  -0.000042
     9  H   -0.000032   0.000001  -0.000027   0.000887  -0.000733   0.000173
    10  H   -0.000168   0.000025  -0.000030   0.000084  -0.000332   0.000751
    11  C    0.000392   0.000318  -0.012868   0.032479  -0.012452  -0.000685
    12  C   -0.000453   0.000525   0.024984  -0.000630   0.000033   0.000038
    13  C    0.000017  -0.000155  -0.001819  -0.001783  -0.000467   0.000003
    14  C   -0.000039  -0.000408   0.003220  -0.001102   0.000114   0.000009
    15  C    0.000000  -0.000011   0.000079  -0.000469   0.000083   0.000000
    16  C    0.000000   0.000059  -0.000436  -0.000118  -0.000009   0.000000
    17  C    0.000000   0.000000   0.000006   0.000022   0.000000   0.000000
    18  H    0.000000   0.000000  -0.000006  -0.000044   0.000005   0.000000
    19  C    0.000000   0.000000  -0.000038   0.000012   0.000000   0.000000
    20  H    0.000000   0.000010  -0.000063  -0.000005   0.000000   0.000000
    21  H    0.000000   0.000000   0.000000   0.000000   0.000000   0.000000
    22  Br   0.000000   0.000000   0.000000   0.000000   0.000000   0.000000
    23  O    0.000046   0.000766  -0.006011   0.000176  -0.000007  -0.000002
    24  O   -0.000005  -0.000002   0.000418   0.000629   0.001859   0.000005
    25  H   -0.000001   0.000000   0.000011   0.000253  -0.000098   0.000013
               7          8          9         10         11         12
     1  C   -0.000579  -0.000484  -0.000032  -0.000168   0.000392  -0.000453
     2  C   -0.000181   0.000769   0.000001   0.000025   0.000318   0.000525
     3  C    0.000017   0.001308  -0.000027  -0.000030  -0.012868   0.024984
     4  C   -0.000055  -0.000035   0.000887   0.000084   0.032479  -0.000630
     5  C   -0.000018   0.000040  -0.000733  -0.000332  -0.012452   0.000033
     6  C    0.000214  -0.000042   0.000173   0.000751  -0.000685   0.000038
     7  H   -0.006811   0.000075   0.000006   0.000052   0.000000   0.000009
     8  H    0.000075   0.001067  -0.000001  -0.000002  -0.000020   0.000117
     9  H    0.000006  -0.000001  -0.006515   0.000017  -0.000060  -0.000005
    10  H    0.000052  -0.000002   0.000017   0.002278  -0.000001  -0.000001
    11  C    0.000000  -0.000020  -0.000060  -0.000001   0.446894  -0.000633
    12  C    0.000009   0.000117  -0.000005  -0.000001  -0.000633  -0.025826
    13  C    0.000000  -0.000005  -0.000043   0.000000   0.037247  -0.000781
    14  C    0.000000  -0.000067  -0.000001   0.000000  -0.013874   0.025158
    15  C    0.000000   0.000000   0.000004   0.000000  -0.012001  -0.000026
    16  C    0.000000   0.000011   0.000000   0.000000  -0.000016   0.001054
    17  C    0.000000   0.000000   0.000000   0.000000  -0.000728   0.000061
    18  H    0.000000   0.000000   0.000001   0.000000   0.000123  -0.000002
    19  C    0.000000   0.000000   0.000000   0.000000   0.000404  -0.000458
    20  H    0.000000   0.000005   0.000000   0.000000  -0.000017   0.000092
    21  H    0.000000   0.000000   0.000000   0.000000   0.000000   0.000007
    22  Br   0.000000   0.000000   0.000000   0.000000   0.000013  -0.000001
    23  O    0.000001  -0.000627   0.000000   0.000000   0.000129  -0.030032
    24  O    0.000000   0.000000   0.000116   0.000000  -0.074182   0.000015
    25  H    0.000000   0.000000  -0.000115   0.000001  -0.000009   0.000007
              13         14         15         16         17         18
     1  C    0.000017  -0.000039   0.000000   0.000000   0.000000   0.000000
     2  C   -0.000155  -0.000408  -0.000011   0.000059   0.000000   0.000000
     3  C   -0.001819   0.003220   0.000079  -0.000436   0.000006  -0.000006
     4  C   -0.001783  -0.001102  -0.000469  -0.000118   0.000022  -0.000044
     5  C   -0.000467   0.000114   0.000083  -0.000009   0.000000   0.000005
     6  C    0.000003   0.000009   0.000000   0.000000   0.000000   0.000000
     7  H    0.000000   0.000000   0.000000   0.000000   0.000000   0.000000
     8  H   -0.000005  -0.000067   0.000000   0.000011   0.000000   0.000000
     9  H   -0.000043  -0.000001   0.000004   0.000000   0.000000   0.000001
    10  H    0.000000   0.000000   0.000000   0.000000   0.000000   0.000000
    11  C    0.037247  -0.013874  -0.012001  -0.000016  -0.000728   0.000123
    12  C   -0.000781   0.025158  -0.000026   0.001054   0.000061  -0.000002
    13  C   -0.081280  -0.020731  -0.013696   0.003463  -0.001232   0.000579
    14  C   -0.020731   0.151779   0.006949  -0.009390   0.002674  -0.000078
    15  C   -0.013696   0.006949   0.133107   0.000204   0.013333  -0.000802
    16  C    0.003463  -0.009390   0.000204  -0.065632  -0.001030   0.000019
    17  C   -0.001232   0.002674   0.013333  -0.001030  -0.059968   0.000433
    18  H    0.000579  -0.000078  -0.000802   0.000019   0.000433  -0.006028
    19  C    0.002659  -0.008721  -0.007948   0.012668  -0.012524  -0.000050
    20  H   -0.000026   0.001316   0.000033   0.000722  -0.000025  -0.000001
    21  H   -0.000039   0.000003  -0.000040  -0.000123   0.000063   0.000004
    22  Br   0.000098  -0.000062  -0.001628   0.000018   0.004978   0.000003
    23  O    0.000206  -0.005985  -0.000006   0.000599  -0.000003   0.000000
    24  O   -0.002354   0.000352   0.002908  -0.000001   0.000014  -0.000149
    25  H   -0.000088  -0.000014   0.000017  -0.000001  -0.000002   0.000012
              19         20         21         22         23         24
     1  C    0.000000   0.000000   0.000000   0.000000   0.000046  -0.000005
     2  C    0.000000   0.000010   0.000000   0.000000   0.000766  -0.000002
     3  C   -0.000038  -0.000063   0.000000   0.000000  -0.006011   0.000418
     4  C    0.000012  -0.000005   0.000000   0.000000   0.000176   0.000629
     5  C    0.000000   0.000000   0.000000   0.000000  -0.000007   0.001859
     6  C    0.000000   0.000000   0.000000   0.000000  -0.000002   0.000005
     7  H    0.000000   0.000000   0.000000   0.000000   0.000001   0.000000
     8  H    0.000000   0.000005   0.000000   0.000000  -0.000627   0.000000
     9  H    0.000000   0.000000   0.000000   0.000000   0.000000   0.000116
    10  H    0.000000   0.000000   0.000000   0.000000   0.000000   0.000000
    11  C    0.000404  -0.000017   0.000000   0.000013   0.000129  -0.074182
    12  C   -0.000458   0.000092   0.000007  -0.000001  -0.030032   0.000015
    13  C    0.002659  -0.000026  -0.000039   0.000098   0.000206  -0.002354
    14  C   -0.008721   0.001316   0.000003  -0.000062  -0.005985   0.000352
    15  C   -0.007948   0.000033  -0.000040  -0.001628  -0.000006   0.002908
    16  C    0.012668   0.000722  -0.000123   0.000018   0.000599  -0.000001
    17  C   -0.012524  -0.000025   0.000063   0.004978  -0.000003   0.000014
    18  H   -0.000050  -0.000001   0.000004   0.000003   0.000000  -0.000149
    19  C    0.140621  -0.000530  -0.000538   0.000546   0.000043  -0.000008
    20  H   -0.000530   0.001150   0.000067  -0.000001  -0.000602   0.000000
    21  H   -0.000538   0.000067  -0.006283   0.000080   0.000001   0.000000
    22  Br   0.000546  -0.000001   0.000080  -0.005461   0.000000  -0.000002
    23  O    0.000043  -0.000602   0.000001   0.000000   0.219688   0.000000
    24  O   -0.000008   0.000000   0.000000  -0.000002   0.000000   0.163264
    25  H    0.000000   0.000000   0.000000   0.000000   0.000000  -0.001154
              25
     1  C   -0.000001
     2  C    0.000000
     3  C    0.000011
     4  C    0.000253
     5  C   -0.000098
     6  C    0.000013
     7  H    0.000000
     8  H    0.000000
     9  H   -0.000115
    10  H    0.000001
    11  C   -0.000009
    12  C    0.000007
    13  C   -0.000088
    14  C   -0.000014
    15  C    0.000017
    16  C   -0.000001
    17  C   -0.000002
    18  H    0.000012
    19  C    0.000000
    20  H    0.000000
    21  H    0.000000
    22  Br   0.000000
    23  O    0.000000
    24  O   -0.001154
    25  H   -0.002641
 Mulliken charges and spin densities:
               1          2
     1  C   -0.192463   0.133636
     2  C   -0.183785  -0.056638
     3  C   -0.085559   0.135582
     4  C    0.076172  -0.093186
     5  C   -0.226403   0.131028
     6  C   -0.198943  -0.064773
     7  H    0.223127  -0.007270
     8  H    0.214543   0.002109
     9  H    0.217020  -0.006326
    10  H    0.223966   0.002674
    11  C    0.192294   0.390452
    12  C    0.234055  -0.006746
    13  C   -0.021891  -0.080227
    14  C   -0.066801   0.131103
    15  C   -0.127088   0.120089
    16  C   -0.188090  -0.057940
    17  C   -0.128318  -0.053927
    18  H    0.240901  -0.005982
    19  C   -0.153165   0.126139
    20  H    0.220350   0.002125
    21  H    0.238748  -0.006799
    22  Br  -0.030713  -0.001418
    23  O   -0.372817   0.178379
    24  O   -0.544572   0.091723
    25  H    0.439432  -0.003810
 Sum of Mulliken charges =   0.00000   1.00000
 Mulliken charges and spin densities with hydrogens summed into heavy atoms:
               1          2
     1  C    0.030664   0.126367
     2  C    0.030758  -0.054529
     3  C   -0.085559   0.135582
     4  C    0.076172  -0.093186
     5  C   -0.009383   0.124702
     6  C    0.025023  -0.062099
    11  C    0.192294   0.390452
    12  C    0.234055  -0.006746
    13  C   -0.021891  -0.080227
    14  C   -0.066801   0.131103
    15  C    0.113814   0.114108
    16  C    0.032259  -0.055815
    17  C   -0.128318  -0.053927
    19  C    0.085583   0.119340
    22  Br  -0.030713  -0.001418
    23  O   -0.372817   0.178379
    24  O   -0.105140   0.087913
 Electronic spatial extent (au):  <R**2>=           6255.1854
 Charge=              0.0000 electrons
 Dipole moment (field-independent basis, Debye):
    X=             -3.2757    Y=             -5.6493    Z=              0.0197  Tot=              6.5303
 Quadrupole moment (field-independent basis, Debye-Ang):
   XX=            -93.3764   YY=           -104.4212   ZZ=           -114.0002
   XY=             19.4093   XZ=             -0.0263   YZ=             -0.0863
 Traceless Quadrupole moment (field-independent basis, Debye-Ang):
   XX=             10.5562   YY=             -0.4886   ZZ=            -10.0676
   XY=             19.4093   XZ=             -0.0263   YZ=             -0.0863
 Octapole moment (field-independent basis, Debye-Ang**2):
  XXX=              2.6825  YYY=            -87.2489  ZZZ=              0.0405  XYY=             39.3452
  XXY=            -39.2091  XXZ=              0.0263  XZZ=             50.5131  YZZ=             -4.9574
  YYZ=              0.1971  XYZ=              0.0579
 Hexadecapole moment (field-independent basis, Debye-Ang**3):
 XXXX=          -5221.1274 YYYY=          -1312.5744 ZZZZ=           -125.5366 XXXY=             48.2100
 XXXZ=              0.0107 YYYX=            158.5807 YYYZ=             -0.9344 ZZZX=              0.0024
 ZZZY=             -0.0389 XXYY=          -1123.6581 XXZZ=          -1094.9172 YYZZ=           -260.1424
 XXYZ=              0.0442 YYXZ=             -0.2127 ZZXY=            -28.0908
 N-N= 1.391488299109D+03 E-N=-1.054125035267D+04  KE= 3.257364070517D+03
                          Isotropic Fermi Contact Couplings
        Atom                 a.u.       MegaHertz       Gauss      10(-4) cm-1
     1  C(13)              0.00884       9.93569       3.54530       3.31419
     2  C(13)             -0.00919     -10.32706      -3.68495      -3.44474
     3  C(13)              0.00745       8.37707       2.98915       2.79429
     4  C(13)             -0.01979     -22.24609      -7.93796      -7.42050
     5  C(13)              0.00852       9.58350       3.41963       3.19671
     6  C(13)             -0.00888      -9.97767      -3.56028      -3.32819
     7  H(1)              -0.00193      -8.64124      -3.08341      -2.88241
     8  H(1)               0.00064       2.85507       1.01876       0.95235
     9  H(1)              -0.00176      -7.87326      -2.80938      -2.62624
    10  H(1)               0.00070       3.10781       1.10894       1.03665
    11  C(13)              0.02566      28.85153      10.29494       9.62384
    12  C(13)             -0.01194     -13.41816      -4.78793      -4.47582
    13  C(13)             -0.01917     -21.55626      -7.69181      -7.19040
    14  C(13)              0.00685       7.69790       2.74680       2.56774
    15  C(13)              0.00744       8.36086       2.98336       2.78888
    16  C(13)             -0.00894     -10.04719      -3.58509      -3.35138
    17  C(13)             -0.00998     -11.21993      -4.00355      -3.74257
    18  H(1)              -0.00170      -7.58108      -2.70512      -2.52878
    19  C(13)              0.00832       9.35527       3.33819       3.12058
    20  H(1)               0.00065       2.90861       1.03787       0.97021
    21  H(1)              -0.00184      -8.21327      -2.93070      -2.73965
    22  Br(79)            -0.00132      -1.48893      -0.53129      -0.49665
    23  O(17)              0.01603      -9.71599      -3.46691      -3.24091
    24  O(17)              0.01544      -9.35783      -3.33911      -3.12144
    25  H(1)              -0.00180      -8.02643      -2.86403      -2.67733
 --------------------------------------------------------
       Center         ----  Spin Dipole Couplings  ----
                      3XX-RR        3YY-RR        3ZZ-RR
 --------------------------------------------------------
     1   Atom       -0.069042     -0.074813      0.143855
     2   Atom        0.031181      0.021864     -0.053045
     3   Atom       -0.070300     -0.072255      0.142555
     4   Atom        0.039753      0.026258     -0.066011
     5   Atom       -0.063600     -0.067091      0.130691
     6   Atom        0.028929      0.027128     -0.056057
     7   Atom        0.009613     -0.008229     -0.001384
     8   Atom        0.005867     -0.002193     -0.003674
     9   Atom       -0.004304      0.007704     -0.003400
    10   Atom        0.002332     -0.000157     -0.002175
    11   Atom       -0.260738     -0.259897      0.520635
    12   Atom       -0.018018      0.005210      0.012808
    13   Atom        0.029249      0.024475     -0.053724
    14   Atom       -0.068337     -0.069212      0.137549
    15   Atom       -0.057844     -0.062149      0.119993
    16   Atom        0.032251      0.022227     -0.054478
    17   Atom        0.024550      0.026752     -0.051303
    18   Atom       -0.001545      0.005324     -0.003779
    19   Atom       -0.066903     -0.068554      0.135457
    20   Atom        0.005861     -0.002297     -0.003564
    21   Atom        0.002997     -0.001716     -0.001280
    22   Atom        0.037009      0.013818     -0.050827
    23   Atom       -0.376728     -0.378870      0.755599
    24   Atom       -0.270960     -0.270672      0.541632
    25   Atom        0.004374      0.006580     -0.010955
 --------------------------------------------------------
                        XY            XZ            YZ
 --------------------------------------------------------
     1   Atom       -0.001467      0.000172     -0.000288
     2   Atom        0.002678     -0.000051      0.000071
     3   Atom        0.000035      0.000028     -0.000160
     4   Atom       -0.002137     -0.000122      0.000144
     5   Atom        0.000522     -0.000068     -0.000647
     6   Atom       -0.002829      0.000026      0.000155
     7   Atom       -0.004891     -0.000018     -0.000004
     8   Atom        0.001838     -0.000002     -0.000004
     9   Atom       -0.000116      0.000007      0.000032
    10   Atom       -0.001981     -0.000006      0.000001
    11   Atom       -0.000009     -0.000502      0.000603
    12   Atom       -0.005069      0.000139      0.000046
    13   Atom        0.006400     -0.000101     -0.000125
    14   Atom        0.000729      0.000088      0.000100
    15   Atom        0.001396      0.000000      0.000310
    16   Atom        0.001646     -0.000033     -0.000100
    17   Atom        0.002698     -0.000020     -0.000102
    18   Atom       -0.003050      0.000003     -0.000025
    19   Atom        0.002937     -0.000017      0.000160
    20   Atom        0.001844     -0.000011     -0.000002
    21   Atom        0.009288     -0.000008      0.000001
    22   Atom       -0.009059      0.000036     -0.000076
    23   Atom        0.000485      0.001854     -0.000673
    24   Atom        0.008573      0.005249      0.003935
    25   Atom        0.019733     -0.000188     -0.000220
 --------------------------------------------------------


 ---------------------------------------------------------------------------------
              Anisotropic Spin Dipole Couplings in Principal Axis System
 ---------------------------------------------------------------------------------

       Atom             a.u.   MegaHertz   Gauss  10(-4) cm-1        Axes

              Baa    -0.0752   -10.086    -3.599    -3.364  0.2330  0.9725  0.0011
     1 C(13)  Bbb    -0.0687    -9.218    -3.289    -3.075  0.9725 -0.2330 -0.0011
              Bcc     0.1439    19.304     6.888     6.439  0.0008 -0.0013  1.0000
 
              Baa    -0.0530    -7.118    -2.540    -2.374  0.0006 -0.0010  1.0000
     2 C(13)  Bbb     0.0211     2.838     1.013     0.947 -0.2579  0.9662  0.0011
              Bcc     0.0319     4.280     1.527     1.428  0.9662  0.2579 -0.0004
 
              Baa    -0.0723    -9.696    -3.460    -3.234 -0.0178  0.9998  0.0007
     3 C(13)  Bbb    -0.0703    -9.433    -3.366    -3.147  0.9998  0.0178 -0.0001
              Bcc     0.1426    19.129     6.826     6.381  0.0001 -0.0007  1.0000
 
              Baa    -0.0660    -8.858    -3.161    -2.955  0.0011 -0.0015  1.0000
     4 C(13)  Bbb     0.0259     3.479     1.241     1.161  0.1528  0.9883  0.0013
              Bcc     0.0401     5.379     1.919     1.794  0.9883 -0.1528 -0.0013
 
              Baa    -0.0672    -9.014    -3.216    -3.007 -0.1446  0.9895  0.0032
     5 C(13)  Bbb    -0.0635    -8.524    -3.042    -2.843  0.9895  0.1446  0.0008
              Bcc     0.1307    17.538     6.258     5.850 -0.0004 -0.0033  1.0000
 
              Baa    -0.0561    -7.522    -2.684    -2.509 -0.0004 -0.0019  1.0000
     6 C(13)  Bbb     0.0251     3.363     1.200     1.122  0.5902  0.8072  0.0017
              Bcc     0.0310     4.160     1.484     1.387  0.8072 -0.5902 -0.0008
 
              Baa    -0.0095    -5.059    -1.805    -1.687  0.2482  0.9687  0.0010
     7 H(1)   Bbb    -0.0014    -0.739    -0.264    -0.246  0.0011 -0.0013  1.0000
              Bcc     0.0109     5.798     2.069     1.934  0.9687 -0.2481 -0.0014
 
              Baa    -0.0037    -1.960    -0.700    -0.654 -0.0003  0.0030  1.0000
     8 H(1)   Bbb    -0.0026    -1.383    -0.494    -0.461 -0.2123  0.9772 -0.0030
              Bcc     0.0063     3.344     1.193     1.115  0.9772  0.2123 -0.0003
 
              Baa    -0.0043    -2.297    -0.820    -0.766  0.9999  0.0097 -0.0081
     9 H(1)   Bbb    -0.0034    -1.814    -0.647    -0.605  0.0082 -0.0028  1.0000
              Bcc     0.0077     4.111     1.467     1.371 -0.0096  0.9999  0.0029
 
              Baa    -0.0022    -1.160    -0.414    -0.387  0.0020  0.0014  1.0000
    10 H(1)   Bbb    -0.0013    -0.668    -0.238    -0.223  0.4838  0.8752 -0.0022
              Bcc     0.0034     1.828     0.652     0.610  0.8752 -0.4838 -0.0011
 
              Baa    -0.2607   -34.989   -12.485   -11.671  1.0000  0.0100  0.0006
    11 C(13)  Bbb    -0.2599   -34.876   -12.445   -11.633 -0.0100  1.0000 -0.0008
              Bcc     0.5206    69.864    24.929    23.304 -0.0006  0.0008  1.0000
 
              Baa    -0.0191    -2.560    -0.913    -0.854  0.9789  0.2043 -0.0046
    12 C(13)  Bbb     0.0063     0.841     0.300     0.281 -0.2043  0.9789 -0.0026
              Bcc     0.0128     1.719     0.613     0.573  0.0039  0.0035  1.0000
 
              Baa    -0.0537    -7.209    -2.572    -2.405  0.0011  0.0015  1.0000
    13 C(13)  Bbb     0.0200     2.688     0.959     0.897 -0.5703  0.8214 -0.0006
              Bcc     0.0337     4.521     1.613     1.508  0.8214  0.5703 -0.0018
 
              Baa    -0.0696    -9.343    -3.334    -3.116 -0.4928  0.8702 -0.0002
    14 C(13)  Bbb    -0.0679    -9.115    -3.252    -3.040  0.8702  0.4928 -0.0006
              Bcc     0.1375    18.458     6.586     6.157  0.0004  0.0005  1.0000
 
              Baa    -0.0626    -8.395    -2.996    -2.800 -0.2837  0.9589 -0.0016
    15 C(13)  Bbb    -0.0574    -7.707    -2.750    -2.571  0.9589  0.2837 -0.0005
              Bcc     0.1200    16.102     5.746     5.371  0.0000  0.0017  1.0000
 
              Baa    -0.0545    -7.311    -2.609    -2.439  0.0004  0.0013  1.0000
    16 C(13)  Bbb     0.0220     2.947     1.052     0.983 -0.1580  0.9874 -0.0012
              Bcc     0.0325     4.363     1.557     1.455  0.9874  0.1580 -0.0006
 
              Baa    -0.0513    -6.884    -2.457    -2.296  0.0002  0.0013  1.0000
    17 C(13)  Bbb     0.0227     3.051     1.089     1.018  0.8300 -0.5577  0.0005
              Bcc     0.0286     3.833     1.368     1.279  0.5577  0.8300 -0.0012
 
              Baa    -0.0038    -2.017    -0.720    -0.673  0.0045  0.0042  1.0000
    18 H(1)   Bbb    -0.0027    -1.443    -0.515    -0.481  0.9348  0.3552 -0.0057
              Bcc     0.0065     3.459     1.234     1.154 -0.3552  0.9348 -0.0023
 
              Baa    -0.0708    -9.498    -3.389    -3.168 -0.6039  0.7971 -0.0007
    19 C(13)  Bbb    -0.0647    -8.679    -3.097    -2.895  0.7971  0.6039 -0.0004
              Bcc     0.1355    18.177     6.486     6.063 -0.0001  0.0008  1.0000
 
              Baa    -0.0036    -1.901    -0.678    -0.634  0.0012  0.0001  1.0000
    20 H(1)   Bbb    -0.0027    -1.438    -0.513    -0.480 -0.2107  0.9775  0.0002
              Bcc     0.0063     3.339     1.191     1.114  0.9775  0.2107 -0.0012
 
              Baa    -0.0089    -4.771    -1.702    -1.591 -0.6140  0.7893 -0.0007
    21 H(1)   Bbb    -0.0013    -0.683    -0.244    -0.228  0.0000  0.0008  1.0000
              Bcc     0.0102     5.454     1.946     1.819  0.7893  0.6140 -0.0005
 
              Baa    -0.0508    -6.818    -2.433    -2.274 -0.0003  0.0011  1.0000
    22 Br(79) Bbb     0.0107     1.435     0.512     0.479  0.3256  0.9455 -0.0010
              Bcc     0.0401     5.383     1.921     1.795  0.9455 -0.3256  0.0006
 
              Baa    -0.3790    27.422     9.785     9.147 -0.2118  0.9773  0.0009
    23 O(17)  Bbb    -0.3766    27.252     9.724     9.090  0.9773  0.2118 -0.0015
              Bcc     0.7556   -54.675   -19.509   -18.238  0.0016 -0.0006  1.0000
 
              Baa    -0.2794    20.217     7.214     6.744  0.7133 -0.7008 -0.0012
    24 O(17)  Bbb    -0.2623    18.979     6.772     6.331  0.7008  0.7133 -0.0081
              Bcc     0.5417   -39.196   -13.986   -13.074  0.0065  0.0049  1.0000
 
              Baa    -0.0143    -7.623    -2.720    -2.543  0.7265 -0.6871 -0.0044
    25 H(1)   Bbb    -0.0110    -5.846    -2.086    -1.950  0.0087  0.0028  1.0000
              Bcc     0.0252    13.469     4.806     4.493  0.6871  0.7265 -0.0080
 

 ---------------------------------------------------------------------------------

 No NMR shielding tensors so no spin-rotation constants.
 Leave Link  601 at Thu Jan 09 21:57:42 2020, MaxMem=   134217728 cpu:         2.0
 (Enter E:\Gaussian\G09W\l701.exe)
 Compute integral first derivatives.
 ... and contract with generalized density number  0.
 R6Disp: Adding Grimme-D3(BJ) dispersion energy 1st derivatives to the gradient.
 D1PCM: PCM CHGder 1st derivatives, ID1Alg=3 FixD1E=F DoIter=F DoCFld=F I1PDM=0.
 GePol: Maximum number of non-zero 1st derivatives   =     349
 Leave Link  701 at Thu Jan 09 21:58:04 2020, MaxMem=   134217728 cpu:        22.0
 (Enter E:\Gaussian\G09W\l702.exe)
 L702 exits ... SP integral derivatives will be done elsewhere.
 Leave Link  702 at Thu Jan 09 21:58:05 2020, MaxMem=   134217728 cpu:         0.0
 (Enter E:\Gaussian\G09W\l703.exe)
 Compute integral first derivatives, UseDBF=F ICtDFT=           0.
 Integral derivatives from FoFJK, PRISM(SPDF).
 Calling FoFJK, ICntrl=      2127 FMM=F ISym2X=0 I1Cent= 0 IOpClX= 1 NMat=1 NMatS=1 NMatT=0.
 FoFJK:  IHMeth= 1 ICntrl=    2127 DoSepK=F KAlg= 0 I1Cent=   0 FoldK=F
 IRaf=         0 NMat=   1 IRICut=       1 DoRegI=T DoRafI=F ISym2E= 0.
 FoFCou: FMM=F IPFlag=           0 FMFlag=      100000 FMFlg1=         800
         NFxFlg=           0 DoJE=F BraDBF=F KetDBF=F FulRan=T
         wScrn=  0.000000 ICntrl=    2127 IOpCl=  1 I1Cent=           0 NGrid=           0
         NMat0=    1 NMatS0=      1 NMatT0=    0 NMatD0=    1 NMtDS0=    0 NMtDT0=    0
 Symmetry not used in FoFCou.
 Leave Link  703 at Thu Jan 09 22:01:26 2020, MaxMem=   134217728 cpu:       200.0
 (Enter E:\Gaussian\G09W\l716.exe)
 Dipole        =-1.28875701D+00-2.22261467D+00 7.73091626D-03
 ***** Axes restored to original set *****
 -------------------------------------------------------------------
 Center     Atomic                   Forces (Hartrees/Bohr)
 Number     Number              X              Y              Z
 -------------------------------------------------------------------
      1        6          -0.000881870   -0.000147154   -0.000036133
      2        6          -0.000337895   -0.000485732    0.000002423
      3        6           0.000287260   -0.000774944    0.000024064
      4        6           0.000046805    0.000289148   -0.000124032
      5        6           0.000145341    0.000441622   -0.000021241
      6        6          -0.001022062    0.000479884    0.000057996
      7        1          -0.000296721   -0.000031653    0.000026742
      8        1          -0.000659647   -0.000165455   -0.000015986
      9        1          -0.000268738    0.000311359   -0.000025841
     10        1          -0.000256659    0.000135360   -0.000011664
     11        6           0.000431183   -0.001383694    0.000240031
     12        6           0.000960882    0.004131531   -0.000048840
     13        6          -0.000122577    0.000293471   -0.000009030
     14        6          -0.000527093   -0.000360493    0.000007173
     15        6           0.000257983    0.000097062   -0.000027981
     16        6           0.000016339   -0.000623378   -0.000007113
     17        6           0.000855452    0.000101172    0.000009421
     18        1           0.000182750    0.000327971    0.000011584
     19        6           0.000684092   -0.000023234   -0.000011315
     20        1           0.000526007   -0.000413130   -0.000018400
     21        1           0.000185319   -0.000289107    0.000016595
     22       35           0.000659309    0.000231315    0.000002115
     23        8          -0.000909364   -0.004104195    0.000032515
     24        8           0.000192801    0.000567732   -0.000150135
     25        1          -0.000148897    0.001394542    0.000077052
 -------------------------------------------------------------------
 Cartesian Forces:  Max     0.004131531 RMS     0.000798319
 Leave Link  716 at Thu Jan 09 22:01:27 2020, MaxMem=   134217728 cpu:         1.0
 (Enter E:\Gaussian\G09W\l103.exe)

 GradGradGradGradGradGradGradGradGradGradGradGradGradGradGradGradGradGrad
 Berny optimization.
 FormGI is forming the generalized inverse of G from B-inverse, IUseBI=4.
 Internal  Forces:  Max     0.004203551 RMS     0.000681872
 Search for a local minimum.
 Step number   1 out of a maximum of  146
 All quantities printed in internal units (Hartrees-Bohrs-Radians)
 RMS Force = .68187D-03 SwitMx=.10000D-02 MixMth= 2
 Mixed Optimization -- En-DIIS/RFO-DIIS
 Second derivative matrix not updated -- first step.
 ITU=  0
     Eigenvalues ---    0.01139   0.01336   0.01623   0.01689   0.01715
     Eigenvalues ---    0.01760   0.01819   0.01843   0.01865   0.02042
     Eigenvalues ---    0.02071   0.02088   0.02102   0.02132   0.02153
     Eigenvalues ---    0.02169   0.02183   0.02188   0.02201   0.02233
     Eigenvalues ---    0.02260   0.02365   0.16000   0.16000   0.16000
     Eigenvalues ---    0.16000   0.16000   0.16000   0.16000   0.16000
     Eigenvalues ---    0.17357   0.22000   0.22431   0.22574   0.23525
     Eigenvalues ---    0.24485   0.24616   0.25000   0.25000   0.25000
     Eigenvalues ---    0.25000   0.25000   0.25000   0.34352   0.34641
     Eigenvalues ---    0.35358   0.35477   0.35492   0.35590   0.35602
     Eigenvalues ---    0.35674   0.35871   0.37229   0.39581   0.40238
     Eigenvalues ---    0.40798   0.41060   0.41367   0.43260   0.43507
     Eigenvalues ---    0.44421   0.44504   0.47094   0.47295   0.48250
     Eigenvalues ---    0.48756   0.54313   0.55219   0.86439
 RFO step:  Lambda=-1.56788329D-04 EMin= 1.13897383D-02
 Linear search not attempted -- first point.
 Iteration  1 RMS(Cart)=  0.00555349 RMS(Int)=  0.00001427
 Iteration  2 RMS(Cart)=  0.00001528 RMS(Int)=  0.00000050
 Iteration  3 RMS(Cart)=  0.00000000 RMS(Int)=  0.00000050
 ITry= 1 IFail=0 DXMaxC= 2.44D-02 DCOld= 1.00D+10 DXMaxT= 3.00D-01 DXLimC= 3.00D+00 Rises=F
 Variable       Old X    -DE/DX   Delta X   Delta X   Delta X     New X
                                 (Linear)    (Quad)   (Total)
    R1        2.61703  -0.00116   0.00000  -0.00240  -0.00240   2.61463
    R2        2.65571  -0.00059   0.00000  -0.00127  -0.00127   2.65444
    R3        2.04883  -0.00029   0.00000  -0.00081  -0.00081   2.04802
    R4        2.65044  -0.00212   0.00000  -0.00474  -0.00474   2.64570
    R5        2.04727  -0.00028   0.00000  -0.00078  -0.00078   2.04649
    R6        2.69783  -0.00127   0.00000  -0.00318  -0.00318   2.69466
    R7        2.78372  -0.00137   0.00000  -0.00386  -0.00386   2.77985
    R8        2.68023  -0.00159   0.00000  -0.00372  -0.00372   2.67651
    R9        2.69698  -0.00159   0.00000  -0.00388  -0.00388   2.69310
   R10        2.60956  -0.00121   0.00000  -0.00243  -0.00243   2.60713
   R11        2.05097  -0.00027   0.00000  -0.00077  -0.00077   2.05020
   R12        2.04908  -0.00029   0.00000  -0.00080  -0.00080   2.04827
   R13        2.69431  -0.00112   0.00000  -0.00270  -0.00270   2.69161
   R14        2.54937  -0.00190   0.00000  -0.00345  -0.00345   2.54593
   R15        2.77886  -0.00138   0.00000  -0.00382  -0.00382   2.77504
   R16        2.34619  -0.00420   0.00000  -0.00486  -0.00486   2.34133
   R17        2.68587  -0.00096   0.00000  -0.00228  -0.00228   2.68358
   R18        2.67755  -0.00153   0.00000  -0.00355  -0.00355   2.67400
   R19        2.65102  -0.00194   0.00000  -0.00435  -0.00435   2.64667
   R20        2.60326  -0.00095   0.00000  -0.00185  -0.00185   2.60141
   R21        2.04284  -0.00035   0.00000  -0.00098  -0.00098   2.04186
   R22        2.61516  -0.00127   0.00000  -0.00264  -0.00264   2.61252
   R23        2.04708  -0.00030   0.00000  -0.00084  -0.00084   2.04624
   R24        2.65463  -0.00058   0.00000  -0.00125  -0.00125   2.65339
   R25        3.62623  -0.00069   0.00000  -0.00400  -0.00400   3.62223
   R26        2.04595  -0.00033   0.00000  -0.00093  -0.00093   2.04502
   R27        1.82448  -0.00098   0.00000  -0.00180  -0.00180   1.82268
    A1        2.08944  -0.00004   0.00000  -0.00001  -0.00001   2.08944
    A2        2.09886  -0.00006   0.00000  -0.00049  -0.00049   2.09838
    A3        2.09488   0.00010   0.00000   0.00049   0.00049   2.09537
    A4        2.11444  -0.00031   0.00000  -0.00148  -0.00148   2.11296
    A5        2.10739   0.00080   0.00000   0.00473   0.00473   2.11212
    A6        2.06136  -0.00048   0.00000  -0.00325  -0.00325   2.05811
    A7        2.08510   0.00047   0.00000   0.00171   0.00171   2.08681
    A8        2.08009  -0.00094   0.00000  -0.00364  -0.00364   2.07645
    A9        2.11799   0.00048   0.00000   0.00192   0.00193   2.11992
   A10        2.06479   0.00016   0.00000   0.00063   0.00063   2.06543
   A11        2.08014   0.00019   0.00000   0.00066   0.00066   2.08080
   A12        2.13825  -0.00036   0.00000  -0.00129  -0.00129   2.13696
   A13        2.11156  -0.00040   0.00000  -0.00169  -0.00169   2.10987
   A14        2.11674  -0.00011   0.00000  -0.00112  -0.00112   2.11562
   A15        2.05488   0.00052   0.00000   0.00282   0.00282   2.05770
   A16        2.10102   0.00012   0.00000   0.00084   0.00084   2.10186
   A17        2.09488   0.00000   0.00000  -0.00005  -0.00005   2.09482
   A18        2.08728  -0.00012   0.00000  -0.00078  -0.00078   2.08650
   A19        2.12293  -0.00043   0.00000  -0.00184  -0.00184   2.12109
   A20        2.14476  -0.00009   0.00000  -0.00031  -0.00031   2.14445
   A21        2.01548   0.00052   0.00000   0.00216   0.00216   2.01764
   A22        2.04039  -0.00069   0.00000  -0.00270  -0.00270   2.03769
   A23        2.12198   0.00041   0.00000   0.00159   0.00159   2.12357
   A24        2.12081   0.00029   0.00000   0.00111   0.00111   2.12192
   A25        2.09257   0.00009   0.00000   0.00034   0.00034   2.09291
   A26        2.10797  -0.00009   0.00000  -0.00038  -0.00038   2.10759
   A27        2.08264   0.00000   0.00000   0.00004   0.00004   2.08268
   A28        2.11233   0.00036   0.00000   0.00162   0.00162   2.11395
   A29        2.09060  -0.00096   0.00000  -0.00384  -0.00384   2.08676
   A30        2.08026   0.00060   0.00000   0.00221   0.00221   2.08247
   A31        2.08370  -0.00053   0.00000  -0.00211  -0.00211   2.08159
   A32        2.08804   0.00014   0.00000   0.00030   0.00030   2.08834
   A33        2.11144   0.00039   0.00000   0.00182   0.00182   2.11325
   A34        2.11895  -0.00027   0.00000  -0.00131  -0.00131   2.11764
   A35        2.06819  -0.00047   0.00000  -0.00314  -0.00314   2.06505
   A36        2.09605   0.00074   0.00000   0.00445   0.00445   2.10050
   A37        2.12947   0.00042   0.00000   0.00198   0.00197   2.13145
   A38        2.08142  -0.00021   0.00000  -0.00099  -0.00099   2.08044
   A39        2.07229  -0.00021   0.00000  -0.00099  -0.00099   2.07130
   A40        2.07134  -0.00022   0.00000  -0.00080  -0.00080   2.07054
   A41        2.10714   0.00022   0.00000   0.00110   0.00110   2.10823
   A42        2.10471   0.00000   0.00000  -0.00029  -0.00029   2.10441
   A43        1.96493  -0.00183   0.00000  -0.01145  -0.01145   1.95348
    D1       -0.00098   0.00001   0.00000   0.00047   0.00047  -0.00052
    D2        3.14043   0.00001   0.00000   0.00035   0.00035   3.14078
    D3        3.14066   0.00002   0.00000   0.00074   0.00074   3.14140
    D4       -0.00111   0.00001   0.00000   0.00062   0.00062  -0.00049
    D5        0.00041   0.00000   0.00000   0.00011   0.00011   0.00053
    D6       -3.14022  -0.00001   0.00000  -0.00046  -0.00046  -3.14068
    D7       -3.14124   0.00000   0.00000  -0.00016  -0.00016  -3.14139
    D8        0.00132  -0.00002   0.00000  -0.00073  -0.00073   0.00059
    D9        0.00015  -0.00001   0.00000  -0.00027  -0.00027  -0.00013
   D10        3.14106   0.00000   0.00000  -0.00012  -0.00012   3.14094
   D11       -3.14127   0.00000   0.00000  -0.00016  -0.00016  -3.14143
   D12       -0.00036   0.00000   0.00000   0.00000  -0.00001  -0.00036
   D13        0.00123  -0.00001   0.00000  -0.00048  -0.00048   0.00075
   D14       -3.13954  -0.00002   0.00000  -0.00124  -0.00124  -3.14077
   D15       -3.13967  -0.00001   0.00000  -0.00064  -0.00064  -3.14031
   D16        0.00275  -0.00002   0.00000  -0.00139  -0.00139   0.00135
   D17       -3.14117   0.00000   0.00000   0.00008   0.00008  -3.14108
   D18        0.00066  -0.00001   0.00000  -0.00106  -0.00106  -0.00039
   D19       -0.00027   0.00000   0.00000   0.00024   0.00024  -0.00002
   D20        3.14156  -0.00001   0.00000  -0.00090  -0.00090   3.14067
   D21       -0.00181   0.00002   0.00000   0.00106   0.00106  -0.00075
   D22        3.13851   0.00001   0.00000   0.00060   0.00060   3.13912
   D23        3.13893   0.00003   0.00000   0.00185   0.00185   3.14077
   D24       -0.00394   0.00003   0.00000   0.00139   0.00139  -0.00255
   D25       -0.00353   0.00003   0.00000   0.00184   0.00184  -0.00168
   D26       -3.14127  -0.00002   0.00000  -0.00100  -0.00100   3.14091
   D27        3.13893   0.00002   0.00000   0.00105   0.00105   3.13998
   D28        0.00118  -0.00003   0.00000  -0.00179  -0.00179  -0.00061
   D29        0.00100  -0.00002   0.00000  -0.00089  -0.00089   0.00012
   D30       -3.14154  -0.00001   0.00000  -0.00032  -0.00032   3.14132
   D31       -3.13936  -0.00001   0.00000  -0.00044  -0.00044  -3.13980
   D32        0.00128   0.00000   0.00000   0.00013   0.00013   0.00140
   D33        0.00174  -0.00002   0.00000  -0.00110  -0.00110   0.00064
   D34       -3.14011  -0.00002   0.00000  -0.00113  -0.00113  -3.14124
   D35        3.13975   0.00003   0.00000   0.00154   0.00154   3.14130
   D36       -0.00209   0.00003   0.00000   0.00151   0.00151  -0.00058
   D37       -0.01638   0.00008   0.00000   0.00381   0.00381  -0.01256
   D38        3.12884   0.00003   0.00000   0.00113   0.00113   3.12998
   D39       -0.00156   0.00001   0.00000   0.00051   0.00051  -0.00104
   D40        3.14073   0.00001   0.00000   0.00044   0.00045   3.14117
   D41        3.13980   0.00002   0.00000   0.00166   0.00166   3.14145
   D42       -0.00110   0.00002   0.00000   0.00159   0.00159   0.00048
   D43        0.00086   0.00000   0.00000  -0.00010  -0.00010   0.00076
   D44       -3.14142   0.00000   0.00000  -0.00004  -0.00004  -3.14145
   D45       -3.14048   0.00000   0.00000  -0.00007  -0.00007  -3.14055
   D46        0.00042   0.00000   0.00000   0.00000   0.00000   0.00042
   D47       -3.14147  -0.00001   0.00000  -0.00030  -0.00030   3.14142
   D48       -0.00040   0.00000   0.00000   0.00024   0.00024  -0.00016
   D49       -0.00012  -0.00001   0.00000  -0.00033  -0.00033  -0.00046
   D50        3.14094   0.00000   0.00000   0.00020   0.00020   3.14115
   D51        3.14053   0.00001   0.00000   0.00039   0.00039   3.14093
   D52       -0.00098   0.00001   0.00000   0.00036   0.00036  -0.00062
   D53       -0.00038   0.00001   0.00000   0.00032   0.00032  -0.00006
   D54        3.14129   0.00001   0.00000   0.00029   0.00029   3.14158
   D55       -0.00023   0.00001   0.00000   0.00037   0.00037   0.00014
   D56        3.14133   0.00001   0.00000   0.00035   0.00035  -3.14150
   D57       -3.14129   0.00000   0.00000  -0.00018  -0.00018  -3.14147
   D58        0.00027   0.00000   0.00000  -0.00019  -0.00019   0.00008
   D59        0.00003  -0.00001   0.00000  -0.00030  -0.00030  -0.00026
   D60       -3.14111  -0.00001   0.00000  -0.00051  -0.00051   3.14157
   D61        3.14155  -0.00001   0.00000  -0.00026  -0.00026   3.14128
   D62        0.00041  -0.00001   0.00000  -0.00047  -0.00047  -0.00007
   D63        0.00028   0.00000   0.00000  -0.00005  -0.00005   0.00023
   D64        3.14142   0.00000   0.00000   0.00015   0.00015   3.14158
   D65       -3.14128   0.00000   0.00000  -0.00004  -0.00004  -3.14132
   D66       -0.00014   0.00000   0.00000   0.00017   0.00017   0.00003
         Item               Value     Threshold  Converged?
 Maximum Force            0.004204     0.000450     NO 
 RMS     Force            0.000682     0.000300     NO 
 Maximum Displacement     0.024350     0.001800     NO 
 RMS     Displacement     0.005553     0.001200     NO 
 Predicted change in Energy=-7.843904D-05
 Lowest energy point so far.  Saving SCF results.
 GradGradGradGradGradGradGradGradGradGradGradGradGradGradGradGradGradGrad

 Leave Link  103 at Thu Jan 09 22:01:28 2020, MaxMem=   134217728 cpu:         1.0
 (Enter E:\Gaussian\G09W\l202.exe)
                          Input orientation:                          
 ---------------------------------------------------------------------
 Center     Atomic      Atomic             Coordinates (Angstroms)
 Number     Number       Type             X           Y           Z
 ---------------------------------------------------------------------
      1          6           0       -3.746589    0.642527    0.000401
      2          6           0       -4.783159    1.558974   -0.000231
      3          6           0       -6.118729    1.138999    0.000137
      4          6           0       -6.417872   -0.255222    0.001019
      5          6           0       -5.340073   -1.174124    0.002431
      6          6           0       -4.032988   -0.732636    0.002057
      7          1           0       -2.717582    0.982666   -0.000074
      8          1           0       -4.586460    2.623914   -0.000750
      9          1           0       -5.514169   -2.244980    0.005442
     10          1           0       -3.224829   -1.454935    0.003415
     11          6           0       -7.779916   -0.674539    0.000370
     12          6           0       -7.184504    2.152937    0.000273
     13          6           0       -8.849003    0.266624    0.000904
     14          6           0       -8.567246    1.658483    0.001328
     15          6           0      -10.195640   -0.167939    0.000672
     16          6           0       -9.628085    2.572911    0.002021
     17          6           0      -11.204908    0.768240    0.001412
     18          1           0      -10.416008   -1.225737   -0.000071
     19          6           0      -10.943596    2.147821    0.002233
     20          1           0       -9.394788    3.630302    0.002347
     21          1           0      -11.756601    2.862053    0.002788
     22         35           0      -13.028396    0.177466    0.001247
     23          8           0       -6.929011    3.365283    0.000486
     24          8           0       -8.145762   -1.971163    0.000355
     25          1           0       -7.382494   -2.560743   -0.010410
 ---------------------------------------------------------------------
                    Distance matrix (angstroms):
                    1          2          3          4          5
     1  C    0.000000
     2  C    1.383601   0.000000
     3  C    2.423538   1.400045   0.000000
     4  C    2.818104   2.442047   1.425952   0.000000
     5  C    2.416489   2.789262   2.440666   1.416346   0.000000
     6  C    1.404671   2.411273   2.802381   2.432201   1.379631
     7  H    1.083766   2.144467   3.404738   3.901861   3.395469
     8  H    2.152041   1.082954   2.133734   3.412257   3.872084
     9  H    3.385566   3.873561   3.437562   2.185369   1.084920
    10  H    2.161385   3.392941   3.886278   3.410988   2.133802
    11  C    4.242922   3.737530   2.459362   1.425128   2.490466
    12  C    3.755077   2.473712   1.471036   2.527242   3.804112
    13  C    5.116243   4.266293   2.866258   2.486508   3.793198
    14  C    4.926551   3.785396   2.503018   2.877860   4.293986
    15  C    6.499779   5.681301   4.281272   3.778776   4.958724
    16  C    6.190184   4.949887   3.791000   4.278294   5.694499
    17  C    7.459379   6.470249   5.099674   4.895221   6.178112
    18  H    6.926150   6.283597   4.904954   4.114242   5.076198
    19  C    7.352743   6.188516   4.929205   5.124138   6.514199
    20  H    6.389755   5.055446   4.115721   4.894827   6.286750
    21  H    8.311835   7.094147   5.895297   6.182187   7.580407
    22  Br   9.293451   8.360174   6.976249   6.624669   7.806223
    23  O    4.188224   2.804895   2.369156   3.656408   4.809465
    24  O    5.117040   4.875343   3.712407   2.435171   2.916704
    25  H    4.845705   4.871212   3.909642   2.499210   2.468676
                    6          7          8          9         10
     6  C    0.000000
     7  H    2.161611   0.000000
     8  H    3.401877   2.487247   0.000000
     9  H    2.116859   4.270671   4.956492   0.000000
    10  H    1.083899   2.489821   4.300123   2.421828   0.000000
    11  C    3.747379   5.326683   4.591073   2.756795   4.621454
    12  C    4.273007   4.617675   2.640389   4.704436   5.356843
    13  C    4.918590   6.173090   4.870944   4.174841   5.881760
    14  C    5.126105   5.888574   4.096184   4.955636   6.183429
    15  C    6.188471   7.566059   6.265569   5.121552   7.088623
    16  C    6.498596   7.091116   5.041883   6.335329   7.564735
    17  C    7.327283   8.490034   6.873674   6.439257   8.283971
    18  H    6.402038   8.008920   6.985946   5.006687   7.194831
    19  C    7.486891   8.308122   6.374939   6.983938   8.518169
    20  H    6.912607   7.182970   4.912519   7.041176   7.995501
    21  H    8.519155   9.232333   7.174096   8.065343   9.561774
    22  Br   9.041331  10.342207   8.789277   7.895054   9.938544
    23  O    5.017958   4.838698   2.457067   5.785919   6.079102
    24  O    4.295214   6.179826   5.812346   2.645805   4.947937
    25  H    3.815930   5.858093   5.890549   1.894887   4.302230
                   11         12         13         14         15
    11  C    0.000000
    12  C    2.889487   0.000000
    13  C    1.424337   2.515697   0.000000
    14  C    2.462293   1.468489   1.420091   0.000000
    15  C    2.468272   3.801764   1.415018   2.446934   0.000000
    16  C    3.736531   2.479409   2.434323   1.400556   2.798996
    17  C    3.716475   4.252180   2.408715   2.783845   1.376609
    18  H    2.693102   4.675259   2.163942   3.425879   1.080508
    19  C    4.239645   3.759096   2.815355   2.426209   2.433554
    20  H    4.597769   2.658565   3.407670   2.138433   3.881753
    21  H    5.321797   4.626762   3.897484   3.408895   3.408439
    22  Br   5.317185   6.168757   4.180344   4.700561   2.853736
    23  O    4.128463   1.238976   3.645279   2.365794   4.811915
    24  O    1.347248   4.234645   2.345686   3.654037   2.730132
    25  H    1.927647   4.717848   3.185087   4.382425   3.693159
                   16         17         18         19         20
    16  C    0.000000
    17  C    2.396499   0.000000
    18  H    3.879504   2.144367   0.000000
    19  C    1.382487   1.404112   3.414564   0.000000
    20  H    1.082822   3.386434   4.962258   2.143958   0.000000
    21  H    2.148066   2.165276   4.302002   1.082176   2.483620
    22  Br   4.159360   1.916800   2.965393   2.868570   5.012503
    23  O    2.812980   5.002792   5.765120   4.195129   2.479979
    24  O    4.779738   4.106423   2.389493   4.979349   5.739032
    25  H    5.603323   5.068838   3.314295   5.903573   6.509879
                   21         22         23         24         25
    21  H    0.000000
    22  Br   2.970601   0.000000
    23  O    4.853748   6.882200   0.000000
    24  O    6.033088   5.334485   5.473403   0.000000
    25  H    6.967044   6.274881   5.943362   0.964519   0.000000
 Stoichiometry    C14H8BrO2(2)
 Framework group  C1[X(C14H8BrO2)]
 Deg. of freedom    69
 Full point group                 C1      NOp   1
 RotChk:  IX=0 Diff= 7.12D-04
 Largest Abelian subgroup         C1      NOp   1
 Largest concise Abelian subgroup C1      NOp   1
                         Standard orientation:                         
 ---------------------------------------------------------------------
 Center     Atomic      Atomic             Coordinates (Angstroms)
 Number     Number       Type             X           Y           Z
 ---------------------------------------------------------------------
      1          6           0       -5.066925    0.089868    0.000601
      2          6           0       -4.029893    1.005793    0.001232
      3          6           0       -2.694535    0.585145    0.000865
      4          6           0       -2.396094   -0.809226   -0.000017
      5          6           0       -3.474356   -1.727585   -0.001429
      6          6           0       -4.781218   -1.285439   -0.001056
      7          1           0       -6.095760    0.430526    0.001076
      8          1           0       -4.226056    2.070832    0.001752
      9          1           0       -3.300799   -2.798529   -0.004441
     10          1           0       -5.589741   -2.007330   -0.002414
     11          6           0       -1.034262   -1.229229    0.000632
     12          6           0       -1.628249    1.598546    0.000729
     13          6           0        0.035300   -0.288605    0.000098
     14          6           0       -0.245756    1.103397   -0.000326
     15          6           0        1.381718   -0.723846    0.000330
     16          6           0        0.815543    2.017289   -0.001019
     17          6           0        2.391457    0.211825   -0.000410
     18          1           0        1.601552   -1.781754    0.001072
     19          6           0        2.130839    1.591537   -0.001231
     20          1           0        0.582779    3.074798   -0.001345
     21          1           0        2.944205    2.305360   -0.001787
     22         35           0        4.214647   -0.379867   -0.000246
     23          8           0       -1.883131    2.811021    0.000515
     24          8           0       -0.669069   -2.526037    0.000647
     25          1           0       -1.432633   -3.115232    0.011411
 ---------------------------------------------------------------------
 Rotational constants (GHZ):      0.9832377      0.1775990      0.1504278
 Leave Link  202 at Thu Jan 09 22:01:28 2020, MaxMem=   134217728 cpu:         0.0
 (Enter E:\Gaussian\G09W\l301.exe)
 Standard basis: 6-311G(d) (5D, 7F)
 Ernie: Thresh=  0.10000D-02 Tol=  0.10000D-05 Strict=F.
 There are   375 symmetry adapted cartesian basis functions of A   symmetry.
 There are   356 symmetry adapted basis functions of A   symmetry.
   356 basis functions,   642 primitive gaussians,   375 cartesian basis functions
    72 alpha electrons       71 beta electrons
       nuclear repulsion energy      1393.4003940289 Hartrees.
 IExCor=  402 DFT=T Ex+Corr=B3LYP ExCW=0 ScaHFX=  0.200000
 ScaDFX=  0.800000  0.720000  1.000000  0.810000 ScalE2=  1.000000  1.000000
 IRadAn=      0 IRanWt=     -1 IRanGd=            0 ICorTp=0 IEmpDi=141
 NAtoms=   25 NActive=   25 NUniq=   25 SFac= 1.00D+00 NAtFMM=   60 NAOKFM=F Big=F
 Integral buffers will be    262144 words long.
 Raffenetti 2 integral format.
 Two-electron integral symmetry is turned on.
 R6Disp:  Grimme-D3(BJ) Dispersion energy=       -0.0633954248 Hartrees.
 Nuclear repulsion after empirical dispersion term =     1393.3369986041 Hartrees.
 ------------------------------------------------------------------------------
 Polarizable Continuum Model (PCM)
 =================================
 Model                : PCM (using non-symmetric T matrix).
 Atomic radii         : UFF (Universal Force Field).
 Polarization charges : Total charges.
 Charge compensation  : None.
 Solution method      : On-the-fly selection.
 Cavity type          : Scaled VdW (van der Waals Surface) (Alpha=1.100).
 Cavity algorithm     : GePol (No added spheres)
                        Default sphere list used, NSphG=   25.
                        Lebedev-Laikov grids with approx.  5.0 points / Ang**2.
                        Smoothing algorithm: Karplus/York (Gamma=1.0000).
                        Polarization charges: spherical gaussians, with
                                              point-specific exponents (IZeta= 3).
                        Self-potential: point-specific (ISelfS= 7).
                        Self-field    : sphere-specific E.n sum rule (ISelfD= 2).
 1st derivatives      : Analytical E(r).r(x)/FMM algorithm (CHGder, D1EAlg=3).
                        Cavity 1st derivative terms included.
 Solvent              : Acetonitrile, Eps=  35.688000 Eps(inf)=   1.806874
 ------------------------------------------------------------------------------
 GePol: Number of generator spheres                  =      25
 GePol: Total number of spheres                      =      25
 GePol: Number of exposed spheres                    =      25 (100.00%)
 GePol: Number of points                             =    2188
 GePol: Average weight of points                     =       0.13
 GePol: Minimum weight of points                     =   0.98D-09
 GePol: Maximum weight of points                     =    0.20577
 GePol: Number of points with low weight             =     137
 GePol: Fraction of low-weight points (<1% of avg)   =       6.26%
 GePol: Cavity surface area                          =    281.054 Ang**2
 GePol: Cavity volume                                =    308.085 Ang**3
 Leave Link  301 at Thu Jan 09 22:01:28 2020, MaxMem=   134217728 cpu:         0.0
 (Enter E:\Gaussian\G09W\l302.exe)
 NPDir=0 NMtPBC=     1 NCelOv=     1 NCel=       1 NClECP=     1 NCelD=      1
         NCelK=      1 NCelE2=     1 NClLst=     1 CellRange=     0.0.
 One-electron integrals computed using PRISM.
 NBasis=   356 RedAO= T EigKep=  8.55D-05  NBF=   356
 NBsUse=   356 1.00D-06 EigRej= -1.00D+00 NBFU=   356
 Precomputing XC quadrature grid using
 IXCGrd= 4 IRadAn=           0 IRanWt=          -1 IRanGd=           0 AccXCQ= 0.00D+00.
 Generated NRdTot=       0 NPtTot=           0 NUsed=           0 NTot=          16
 NSgBfM=   363   363   364   364   364 MxSgAt=    25 MxSgA2=    25.
 Leave Link  302 at Thu Jan 09 22:01:30 2020, MaxMem=   134217728 cpu:         1.0
 (Enter E:\Gaussian\G09W\l303.exe)
 DipDrv:  MaxL=1.
 Leave Link  303 at Thu Jan 09 22:01:31 2020, MaxMem=   134217728 cpu:         0.0
 (Enter E:\Gaussian\G09W\l401.exe)
 Initial guess from the checkpoint file:  "E:\Gaussian file\2-BrHAQ opt.chk"
 B after Tr=     0.000000    0.000000    0.000000
         Rot=    1.000000    0.000027   -0.000032    0.000073 Ang=   0.01 deg.
 Guess basis will be translated and rotated to current coordinates.
 JPrj=2 DoOrth=T DoCkMO=T.
 Initial guess <Sx>= 0.0000 <Sy>= 0.0000 <Sz>= 0.5000 <S**2>= 0.7732 S= 0.5115
 Generating alternative initial guess.
 ExpMin= 1.03D-01 ExpMax= 4.40D+05 ExpMxC= 1.51D+04 IAcc=2 IRadAn=         4 AccDes= 0.00D+00
 Harris functional with IExCor=  402 and IRadAn=       4 diagonalized for initial guess.
 HarFok:  IExCor=  402 AccDes= 0.00D+00 IRadAn=         4 IDoV= 1 UseB2=F ITyADJ=14
 ICtDFT=  3500011 ScaDFX=  1.000000  1.000000  1.000000  1.000000
 FoFCou: FMM=F IPFlag=           0 FMFlag=      100000 FMFlg1=           0
         NFxFlg=           0 DoJE=T BraDBF=F KetDBF=T FulRan=T
         wScrn=  0.000000 ICntrl=     500 IOpCl=  0 I1Cent=   200000004 NGrid=           0
         NMat0=    1 NMatS0=      1 NMatT0=    0 NMatD0=    1 NMtDS0=    0 NMtDT0=    0
 Petite list used in FoFCou.
 Harris En= -3263.19711956025    
 Leave Link  401 at Thu Jan 09 22:01:50 2020, MaxMem=   134217728 cpu:        18.0
 (Enter E:\Gaussian\G09W\l502.exe)
 UHF open shell SCF:
 Using DIIS extrapolation, IDIIS=  1040.
 Integral symmetry usage will be decided dynamically.
 IVT=      444890 IEndB=      444890 NGot=   134217728 MDV=   133930479
 LenX=   133930479 LenY=   133789413
 Requested convergence on RMS density matrix=1.00D-08 within 128 cycles.
 Requested convergence on MAX density matrix=1.00D-06.
 Requested convergence on             energy=1.00D-06.
 No special actions if energy rises.
 Fock matrices will be formed incrementally for  20 cycles.

 Cycle   1  Pass 1  IDiag  1:
 FoFJK:  IHMeth= 1 ICntrl=       0 DoSepK=F KAlg= 0 I1Cent=   0 FoldK=F
 IRaf= 780000000 NMat=   1 IRICut=       1 DoRegI=T DoRafI=F ISym2E= 0.
 FoFCou: FMM=F IPFlag=           0 FMFlag=      100000 FMFlg1=           0
         NFxFlg=           0 DoJE=F BraDBF=F KetDBF=F FulRan=T
         wScrn=  0.000000 ICntrl=       0 IOpCl=  1 I1Cent=           0 NGrid=           0
         NMat0=    1 NMatS0=      1 NMatT0=    0 NMatD0=    1 NMtDS0=    0 NMtDT0=    0
 Symmetry not used in FoFCou.
 Inv3:  Mode=1 IEnd=    14362032.
 Iteration    1 A*A^-1 deviation from unit magnitude is 2.22D-15 for    341.
 Iteration    1 A*A^-1 deviation from orthogonality  is 2.23D-15 for   1386    370.
 Iteration    1 A^-1*A deviation from unit magnitude is 2.33D-15 for   2172.
 Iteration    1 A^-1*A deviation from orthogonality  is 2.67D-13 for   1602   1568.
 E= -3263.12398761244    
 DIIS: error= 3.07D-04 at cycle   1 NSaved=   1.
 NSaved= 1 IEnMin= 1 EnMin= -3263.12398761244     IErMin= 1 ErrMin= 3.07D-04
 ErrMax= 3.07D-04  0.00D+00 EMaxC= 1.00D-01 BMatC= 1.87D-04 BMatP= 1.87D-04
 IDIUse=3 WtCom= 9.97D-01 WtEn= 3.07D-03
 Coeff-Com:  0.100D+01
 Coeff-En:   0.100D+01
 Coeff:      0.100D+01
 Gap=     0.728 Goal=   None    Shift=    0.000
 Gap=     0.796 Goal=   None    Shift=    0.000
 RMSDP=5.95D-05 MaxDP=2.18D-03              OVMax= 1.37D-03

 Cycle   2  Pass 1  IDiag  1:
 RMSU=  5.94D-05    CP:  1.00D+00
 E= -3263.12403349602     Delta-E=       -0.000045883586 Rises=F Damp=F
 DIIS: error= 1.60D-04 at cycle   2 NSaved=   2.
 NSaved= 2 IEnMin= 2 EnMin= -3263.12403349602     IErMin= 2 ErrMin= 1.60D-04
 ErrMax= 1.60D-04  0.00D+00 EMaxC= 1.00D-01 BMatC= 2.48D-05 BMatP= 1.87D-04
 IDIUse=3 WtCom= 9.98D-01 WtEn= 1.60D-03
 Coeff-Com:  0.167D+00 0.833D+00
 Coeff-En:   0.000D+00 0.100D+01
 Coeff:      0.167D+00 0.833D+00
 Gap=     0.112 Goal=   None    Shift=    0.000
 Gap=     0.133 Goal=   None    Shift=    0.000
 RMSDP=2.94D-05 MaxDP=1.23D-03 DE=-4.59D-05 OVMax= 1.36D-03

 Cycle   3  Pass 1  IDiag  1:
 RMSU=  2.89D-05    CP:  1.00D+00  9.86D-01
 E= -3263.12403241209     Delta-E=        0.000001083931 Rises=F Damp=F
 DIIS: error= 2.25D-04 at cycle   3 NSaved=   3.
 NSaved= 3 IEnMin= 2 EnMin= -3263.12403349602     IErMin= 2 ErrMin= 1.60D-04
 ErrMax= 2.25D-04  0.00D+00 EMaxC= 1.00D-01 BMatC= 3.28D-05 BMatP= 2.48D-05
 IDIUse=3 WtCom= 4.00D-01 WtEn= 6.00D-01
 Coeff-Com:  0.535D-02 0.536D+00 0.459D+00
 Coeff-En:   0.000D+00 0.542D+00 0.458D+00
 Coeff:      0.214D-02 0.540D+00 0.458D+00
 Gap=     0.112 Goal=   None    Shift=    0.000
 Gap=     0.133 Goal=   None    Shift=    0.000
 RMSDP=1.87D-05 MaxDP=8.32D-04 DE= 1.08D-06 OVMax= 1.02D-03

 Cycle   4  Pass 1  IDiag  1:
 RMSU=  5.46D-06    CP:  1.00D+00  9.96D-01  4.00D-01
 E= -3263.12403823266     Delta-E=       -0.000005820569 Rises=F Damp=F
 DIIS: error= 5.16D-05 at cycle   4 NSaved=   4.
 NSaved= 4 IEnMin= 4 EnMin= -3263.12403823266     IErMin= 4 ErrMin= 5.16D-05
 ErrMax= 5.16D-05  0.00D+00 EMaxC= 1.00D-01 BMatC= 2.30D-06 BMatP= 2.48D-05
 IDIUse=1 WtCom= 1.00D+00 WtEn= 0.00D+00
 Coeff-Com: -0.128D-01 0.239D+00 0.278D+00 0.496D+00
 Coeff:     -0.128D-01 0.239D+00 0.278D+00 0.496D+00
 Gap=     0.112 Goal=   None    Shift=    0.000
 Gap=     0.133 Goal=   None    Shift=    0.000
 RMSDP=3.62D-06 MaxDP=1.51D-04 DE=-5.82D-06 OVMax= 1.76D-04

 Cycle   5  Pass 1  IDiag  1:
 RMSU=  1.72D-06    CP:  1.00D+00  9.93D-01  4.81D-01  6.29D-01
 E= -3263.12403868986     Delta-E=       -0.000000457204 Rises=F Damp=F
 DIIS: error= 1.41D-05 at cycle   5 NSaved=   5.
 NSaved= 5 IEnMin= 5 EnMin= -3263.12403868986     IErMin= 5 ErrMin= 1.41D-05
 ErrMax= 1.41D-05  0.00D+00 EMaxC= 1.00D-01 BMatC= 1.19D-07 BMatP= 2.30D-06
 IDIUse=1 WtCom= 1.00D+00 WtEn= 0.00D+00
 Coeff-Com: -0.664D-02 0.939D-01 0.120D+00 0.265D+00 0.528D+00
 Coeff:     -0.664D-02 0.939D-01 0.120D+00 0.265D+00 0.528D+00
 Gap=     0.112 Goal=   None    Shift=    0.000
 Gap=     0.133 Goal=   None    Shift=    0.000
 RMSDP=7.13D-07 MaxDP=2.27D-05 DE=-4.57D-07 OVMax= 6.84D-05

 Cycle   6  Pass 1  IDiag  1:
 RMSU=  4.23D-07    CP:  1.00D+00  9.96D-01  4.73D-01  6.41D-01  7.11D-01
 E= -3263.12403871665     Delta-E=       -0.000000026781 Rises=F Damp=F
 DIIS: error= 5.52D-06 at cycle   6 NSaved=   6.
 NSaved= 6 IEnMin= 6 EnMin= -3263.12403871665     IErMin= 6 ErrMin= 5.52D-06
 ErrMax= 5.52D-06  0.00D+00 EMaxC= 1.00D-01 BMatC= 1.97D-08 BMatP= 1.19D-07
 IDIUse=1 WtCom= 1.00D+00 WtEn= 0.00D+00
 Coeff-Com: -0.196D-02 0.169D-01 0.278D-01 0.755D-01 0.305D+00 0.577D+00
 Coeff:     -0.196D-02 0.169D-01 0.278D-01 0.755D-01 0.305D+00 0.577D+00
 Gap=     0.112 Goal=   None    Shift=    0.000
 Gap=     0.133 Goal=   None    Shift=    0.000
 RMSDP=2.51D-07 MaxDP=8.21D-06 DE=-2.68D-08 OVMax= 3.45D-05

 Cycle   7  Pass 1  IDiag  1:
 RMSU=  2.04D-07    CP:  1.00D+00  9.97D-01  4.77D-01  6.31D-01  7.41D-01
                    CP:  8.85D-01
 E= -3263.12403872211     Delta-E=       -0.000000005467 Rises=F Damp=F
 DIIS: error= 1.57D-06 at cycle   7 NSaved=   7.
 NSaved= 7 IEnMin= 7 EnMin= -3263.12403872211     IErMin= 7 ErrMin= 1.57D-06
 ErrMax= 1.57D-06  0.00D+00 EMaxC= 1.00D-01 BMatC= 2.11D-09 BMatP= 1.97D-08
 IDIUse=1 WtCom= 1.00D+00 WtEn= 0.00D+00
 Coeff-Com:  0.586D-04-0.541D-02-0.377D-02-0.496D-02 0.715D-01 0.252D+00
 Coeff-Com:  0.690D+00
 Coeff:      0.586D-04-0.541D-02-0.377D-02-0.496D-02 0.715D-01 0.252D+00
 Coeff:      0.690D+00
 Gap=     0.112 Goal=   None    Shift=    0.000
 Gap=     0.133 Goal=   None    Shift=    0.000
 RMSDP=1.19D-07 MaxDP=5.04D-06 DE=-5.47D-09 OVMax= 1.41D-05

 Cycle   8  Pass 1  IDiag  1:
 RMSU=  9.07D-08    CP:  1.00D+00  9.97D-01  4.78D-01  6.37D-01  7.61D-01
                    CP:  9.58D-01  9.06D-01
 E= -3263.12403872305     Delta-E=       -0.000000000933 Rises=F Damp=F
 DIIS: error= 1.01D-06 at cycle   8 NSaved=   8.
 NSaved= 8 IEnMin= 8 EnMin= -3263.12403872305     IErMin= 8 ErrMin= 1.01D-06
 ErrMax= 1.01D-06  0.00D+00 EMaxC= 1.00D-01 BMatC= 8.05D-10 BMatP= 2.11D-09
 IDIUse=1 WtCom= 1.00D+00 WtEn= 0.00D+00
 Coeff-Com:  0.523D-03-0.772D-02-0.924D-02-0.241D-01-0.340D-01-0.104D-01
 Coeff-Com:  0.388D+00 0.696D+00
 Coeff:      0.523D-03-0.772D-02-0.924D-02-0.241D-01-0.340D-01-0.104D-01
 Coeff:      0.388D+00 0.696D+00
 Gap=     0.112 Goal=   None    Shift=    0.000
 Gap=     0.133 Goal=   None    Shift=    0.000
 RMSDP=6.59D-08 MaxDP=3.96D-06 DE=-9.33D-10 OVMax= 1.45D-05

 Cycle   9  Pass 1  IDiag  1:
 RMSU=  4.74D-08    CP:  1.00D+00  9.97D-01  4.79D-01  6.37D-01  7.74D-01
                    CP:  9.99D-01  1.07D+00  1.14D+00
 E= -3263.12403872345     Delta-E=       -0.000000000403 Rises=F Damp=F
 DIIS: error= 5.77D-07 at cycle   9 NSaved=   9.
 NSaved= 9 IEnMin= 9 EnMin= -3263.12403872345     IErMin= 9 ErrMin= 5.77D-07
 ErrMax= 5.77D-07  0.00D+00 EMaxC= 1.00D-01 BMatC= 1.78D-10 BMatP= 8.05D-10
 IDIUse=1 WtCom= 1.00D+00 WtEn= 0.00D+00
 Coeff-Com:  0.216D-03-0.147D-02-0.236D-02-0.934D-02-0.369D-01-0.926D-01
 Coeff-Com: -0.803D-01 0.270D+00 0.953D+00
 Coeff:      0.216D-03-0.147D-02-0.236D-02-0.934D-02-0.369D-01-0.926D-01
 Coeff:     -0.803D-01 0.270D+00 0.953D+00
 Gap=     0.112 Goal=   None    Shift=    0.000
 Gap=     0.133 Goal=   None    Shift=    0.000
 RMSDP=6.17D-08 MaxDP=3.33D-06 DE=-4.03D-10 OVMax= 9.50D-06

 Cycle  10  Pass 1  IDiag  1:
 RMSU=  2.47D-08    CP:  1.00D+00  9.97D-01  4.80D-01  6.36D-01  7.82D-01
                    CP:  1.02D+00  1.17D+00  1.57D+00  1.15D+00
 E= -3263.12403872357     Delta-E=       -0.000000000117 Rises=F Damp=F
 DIIS: error= 2.93D-07 at cycle  10 NSaved=  10.
 NSaved=10 IEnMin=10 EnMin= -3263.12403872357     IErMin=10 ErrMin= 2.93D-07
 ErrMax= 2.93D-07  0.00D+00 EMaxC= 1.00D-01 BMatC= 8.56D-11 BMatP= 1.78D-10
 IDIUse=1 WtCom= 1.00D+00 WtEn= 0.00D+00
 Coeff-Com:  0.520D-06 0.118D-02 0.115D-02 0.171D-03-0.167D-01-0.610D-01
 Coeff-Com: -0.150D+00-0.226D-02 0.612D+00 0.616D+00
 Coeff:      0.520D-06 0.118D-02 0.115D-02 0.171D-03-0.167D-01-0.610D-01
 Coeff:     -0.150D+00-0.226D-02 0.612D+00 0.616D+00
 Gap=     0.112 Goal=   None    Shift=    0.000
 Gap=     0.133 Goal=   None    Shift=    0.000
 RMSDP=2.47D-08 MaxDP=1.38D-06 DE=-1.17D-10 OVMax= 5.73D-06

 Cycle  11  Pass 1  IDiag  1:
 RMSU=  9.91D-09    CP:  1.00D+00  9.97D-01  4.80D-01  6.36D-01  7.83D-01
                    CP:  1.04D+00  1.22D+00  1.67D+00  1.46D+00  9.13D-01
 E= -3263.12403872373     Delta-E=       -0.000000000163 Rises=F Damp=F
 DIIS: error= 1.08D-07 at cycle  11 NSaved=  11.
 NSaved=11 IEnMin=11 EnMin= -3263.12403872373     IErMin=11 ErrMin= 1.08D-07
 ErrMax= 1.08D-07  0.00D+00 EMaxC= 1.00D-01 BMatC= 7.58D-12 BMatP= 8.56D-11
 IDIUse=1 WtCom= 1.00D+00 WtEn= 0.00D+00
 Coeff-Com: -0.297D-04 0.621D-03 0.796D-03 0.132D-02-0.901D-03-0.961D-02
 Coeff-Com: -0.465D-01-0.317D-01 0.806D-01 0.211D+00 0.794D+00
 Coeff:     -0.297D-04 0.621D-03 0.796D-03 0.132D-02-0.901D-03-0.961D-02
 Coeff:     -0.465D-01-0.317D-01 0.806D-01 0.211D+00 0.794D+00
 Gap=     0.112 Goal=   None    Shift=    0.000
 Gap=     0.133 Goal=   None    Shift=    0.000
 RMSDP=1.03D-08 MaxDP=3.83D-07 DE=-1.63D-10 OVMax= 1.54D-06

 Cycle  12  Pass 1  IDiag  1:
 RMSU=  6.11D-09    CP:  1.00D+00  9.97D-01  4.80D-01  6.35D-01  7.83D-01
                    CP:  1.04D+00  1.23D+00  1.71D+00  1.52D+00  1.05D+00
                    CP:  1.11D+00
 E= -3263.12403872359     Delta-E=        0.000000000142 Rises=F Damp=F
 DIIS: error= 7.22D-08 at cycle  12 NSaved=  12.
 NSaved=12 IEnMin=11 EnMin= -3263.12403872373     IErMin=12 ErrMin= 7.22D-08
 ErrMax= 7.22D-08  0.00D+00 EMaxC= 1.00D-01 BMatC= 4.17D-12 BMatP= 7.58D-12
 IDIUse=1 WtCom= 1.00D+00 WtEn= 0.00D+00
 Coeff-Com: -0.220D-04 0.938D-04 0.229D-03 0.865D-03 0.436D-02 0.115D-01
 Coeff-Com:  0.122D-01-0.218D-01-0.123D+00-0.363D-01 0.508D+00 0.644D+00
 Coeff:     -0.220D-04 0.938D-04 0.229D-03 0.865D-03 0.436D-02 0.115D-01
 Coeff:      0.122D-01-0.218D-01-0.123D+00-0.363D-01 0.508D+00 0.644D+00
 Gap=     0.112 Goal=   None    Shift=    0.000
 Gap=     0.133 Goal=   None    Shift=    0.000
 RMSDP=5.06D-09 MaxDP=2.51D-07 DE= 1.42D-10 OVMax= 9.90D-07

 Error on total polarization charges =  0.01434
 SCF Done:  E(UB3LYP) =  -3263.12403872     A.U. after   12 cycles
            NFock= 12  Conv=0.51D-08     -V/T= 2.0017
 <Sx>= 0.0000 <Sy>= 0.0000 <Sz>= 0.5000 <S**2>= 0.7730 S= 0.5114
 <L.S>= 0.000000000000E+00
 KE= 3.257449032043D+03 PE=-1.054500773510D+04 EE= 2.631097665724D+03
 Annihilation of the first spin contaminant:
 S**2 before annihilation     0.7730,   after     0.7504
 Leave Link  502 at Thu Jan 09 22:17:45 2020, MaxMem=   134217728 cpu:       954.0
 (Enter E:\Gaussian\G09W\l701.exe)
 Compute integral first derivatives.
 ... and contract with generalized density number  0.
 R6Disp: Adding Grimme-D3(BJ) dispersion energy 1st derivatives to the gradient.
 D1PCM: PCM CHGder 1st derivatives, ID1Alg=3 FixD1E=F DoIter=F DoCFld=F I1PDM=0.
 GePol: Maximum number of non-zero 1st derivatives   =     349
 Leave Link  701 at Thu Jan 09 22:18:08 2020, MaxMem=   134217728 cpu:        22.0
 (Enter E:\Gaussian\G09W\l702.exe)
 L702 exits ... SP integral derivatives will be done elsewhere.
 Leave Link  702 at Thu Jan 09 22:18:08 2020, MaxMem=   134217728 cpu:         0.0
 (Enter E:\Gaussian\G09W\l703.exe)
 Compute integral first derivatives, UseDBF=F ICtDFT=           0.
 Integral derivatives from FoFJK, PRISM(SPDF).
 Calling FoFJK, ICntrl=      2127 FMM=F ISym2X=0 I1Cent= 0 IOpClX= 1 NMat=1 NMatS=1 NMatT=0.
 FoFJK:  IHMeth= 1 ICntrl=    2127 DoSepK=F KAlg= 0 I1Cent=   0 FoldK=F
 IRaf=         0 NMat=   1 IRICut=       1 DoRegI=T DoRafI=F ISym2E= 0.
 FoFCou: FMM=F IPFlag=           0 FMFlag=      100000 FMFlg1=         800
         NFxFlg=           0 DoJE=F BraDBF=F KetDBF=F FulRan=T
         wScrn=  0.000000 ICntrl=    2127 IOpCl=  1 I1Cent=           0 NGrid=           0
         NMat0=    1 NMatS0=      1 NMatT0=    0 NMatD0=    1 NMtDS0=    0 NMtDT0=    0
 Symmetry not used in FoFCou.
 Leave Link  703 at Thu Jan 09 22:21:43 2020, MaxMem=   134217728 cpu:       214.0
 (Enter E:\Gaussian\G09W\l716.exe)
 Dipole        =-1.29435529D+00-2.20659260D+00 7.53243134D-03
 ***** Axes restored to original set *****
 -------------------------------------------------------------------
 Center     Atomic                   Forces (Hartrees/Bohr)
 Number     Number              X              Y              Z
 -------------------------------------------------------------------
      1        6           0.000158541   -0.000098132   -0.000005550
      2        6           0.000329713    0.000013554    0.000005570
      3        6           0.000057516   -0.000417540   -0.000022170
      4        6          -0.000068874    0.000213376   -0.000046818
      5        6           0.000195820    0.000034340    0.000042182
      6        6           0.000079350   -0.000013322   -0.000005880
      7        1           0.000057172   -0.000071399    0.000007931
      8        1          -0.000136809    0.000016933   -0.000009274
      9        1           0.000102710   -0.000022730   -0.000021207
     10        1           0.000057882   -0.000007852   -0.000004273
     11        6          -0.000376978   -0.000125979    0.000006233
     12        6           0.000255380    0.001314447    0.000106213
     13        6           0.000130682    0.000219347    0.000020097
     14        6          -0.000230124   -0.000328516   -0.000034956
     15        6           0.000021126   -0.000064158    0.000011673
     16        6          -0.000270887    0.000136908    0.000004550
     17        6           0.000000800    0.000126390    0.000002208
     18        1          -0.000033378    0.000005267    0.000001140
     19        6          -0.000079673    0.000110927   -0.000005737
     20        1           0.000185862   -0.000016630   -0.000003656
     21        1          -0.000085444   -0.000063816    0.000002079
     22       35          -0.000277494   -0.000052784   -0.000000337
     23        8          -0.000103823   -0.000621424   -0.000041212
     24        8           0.000151516    0.000007669   -0.000072800
     25        1          -0.000120585   -0.000294877    0.000063996
 -------------------------------------------------------------------
 Cartesian Forces:  Max     0.001314447 RMS     0.000214345
 Leave Link  716 at Thu Jan 09 22:21:44 2020, MaxMem=   134217728 cpu:         0.0
 (Enter E:\Gaussian\G09W\l103.exe)

 GradGradGradGradGradGradGradGradGradGradGradGradGradGradGradGradGradGrad
 Berny optimization.
 Using GEDIIS/GDIIS optimizer.
 FormGI is forming the generalized inverse of G from B-inverse, IUseBI=4.
 Internal  Forces:  Max     0.000629495 RMS     0.000147739
 Search for a local minimum.
 Step number   2 out of a maximum of  146
 All quantities printed in internal units (Hartrees-Bohrs-Radians)
 RMS Force = .14774D-03 SwitMx=.10000D-02 MixMth= 2
 Mixed Optimization -- En-DIIS/RFO-DIIS
 Swapping is turned off.
 Update second derivatives using D2CorX and points    1    2
 DE= -6.86D-05 DEPred=-7.84D-05 R= 8.75D-01
 TightC=F SS=  1.41D+00  RLast= 2.38D-02 DXNew= 5.0454D-01 7.1419D-02
 Trust test= 8.75D-01 RLast= 2.38D-02 DXMaxT set to 3.00D-01
 ITU=  1  0
     Eigenvalues ---    0.01140   0.01336   0.01624   0.01689   0.01714
     Eigenvalues ---    0.01761   0.01819   0.01842   0.01865   0.02042
     Eigenvalues ---    0.02071   0.02088   0.02102   0.02132   0.02154
     Eigenvalues ---    0.02169   0.02183   0.02188   0.02201   0.02233
     Eigenvalues ---    0.02260   0.02358   0.15285   0.16000   0.16000
     Eigenvalues ---    0.16000   0.16000   0.16000   0.16000   0.16714
     Eigenvalues ---    0.17694   0.21983   0.22458   0.22804   0.23608
     Eigenvalues ---    0.24097   0.24587   0.24755   0.25000   0.25000
     Eigenvalues ---    0.25000   0.25000   0.25165   0.34578   0.34991
     Eigenvalues ---    0.35359   0.35483   0.35512   0.35590   0.35609
     Eigenvalues ---    0.35681   0.35870   0.37283   0.39589   0.40777
     Eigenvalues ---    0.41035   0.41305   0.41585   0.43211   0.43535
     Eigenvalues ---    0.44466   0.46207   0.47102   0.47325   0.48460
     Eigenvalues ---    0.50595   0.54379   0.56151   0.82652
 En-DIIS/RFO-DIIS IScMMF=        0 using points:     2    1
 RFO step:  Lambda=-4.70022287D-06.
 NNeg= 0 NP= 2 Switch=  2.50D-03 Rises=F DC=  6.86D-05 SmlDif=  1.00D-05
 RMS Error=  0.2451174148D-03 NUsed= 2 EDIIS=F
 DidBck=F Rises=F RFO-DIIS coefs:    0.89474    0.10526
 Iteration  1 RMS(Cart)=  0.00116601 RMS(Int)=  0.00000115
 Iteration  2 RMS(Cart)=  0.00000120 RMS(Int)=  0.00000014
 Iteration  3 RMS(Cart)=  0.00000000 RMS(Int)=  0.00000014
 ITry= 1 IFail=0 DXMaxC= 5.50D-03 DCOld= 1.00D+10 DXMaxT= 3.00D-01 DXLimC= 3.00D+00 Rises=F
 Variable       Old X    -DE/DX   Delta X   Delta X   Delta X     New X
                                 (Linear)    (Quad)   (Total)
    R1        2.61463   0.00016   0.00025  -0.00006   0.00020   2.61483
    R2        2.65444  -0.00010   0.00013  -0.00041  -0.00028   2.65417
    R3        2.04802   0.00003   0.00009  -0.00003   0.00006   2.04808
    R4        2.64570   0.00036   0.00050   0.00003   0.00053   2.64623
    R5        2.04649   0.00000   0.00008  -0.00012  -0.00003   2.04645
    R6        2.69466   0.00006   0.00033  -0.00030   0.00004   2.69470
    R7        2.77985   0.00054   0.00041   0.00082   0.00123   2.78108
    R8        2.67651   0.00043   0.00039   0.00036   0.00075   2.67726
    R9        2.69310   0.00054   0.00041   0.00062   0.00103   2.69413
   R10        2.60713   0.00013   0.00026  -0.00013   0.00013   2.60726
   R11        2.05020   0.00000   0.00008  -0.00011  -0.00003   2.05017
   R12        2.04827   0.00004   0.00008   0.00000   0.00008   2.04835
   R13        2.69161   0.00030   0.00028   0.00026   0.00054   2.69215
   R14        2.54593   0.00027   0.00036  -0.00007   0.00029   2.54622
   R15        2.77504   0.00053   0.00040   0.00075   0.00116   2.77620
   R16        2.34133  -0.00063   0.00051  -0.00136  -0.00084   2.34048
   R17        2.68358   0.00001   0.00024  -0.00032  -0.00008   2.68350
   R18        2.67400   0.00024   0.00037  -0.00001   0.00036   2.67436
   R19        2.64667   0.00030   0.00046  -0.00004   0.00041   2.64708
   R20        2.60141   0.00024   0.00019   0.00016   0.00035   2.60177
   R21        2.04186   0.00001   0.00010  -0.00012  -0.00002   2.04185
   R22        2.61252   0.00019   0.00028  -0.00002   0.00025   2.61278
   R23        2.04624   0.00002   0.00009  -0.00008   0.00001   2.04625
   R24        2.65339   0.00003   0.00013  -0.00011   0.00002   2.65341
   R25        3.62223   0.00028   0.00042   0.00088   0.00130   3.62353
   R26        2.04502   0.00002   0.00010  -0.00009   0.00001   2.04503
   R27        1.82268   0.00009   0.00019  -0.00011   0.00008   1.82276
    A1        2.08944  -0.00009   0.00000  -0.00044  -0.00044   2.08900
    A2        2.09838   0.00012   0.00005   0.00057   0.00062   2.09900
    A3        2.09537  -0.00003  -0.00005  -0.00013  -0.00018   2.09519
    A4        2.11296   0.00013   0.00016   0.00030   0.00046   2.11341
    A5        2.11212   0.00009  -0.00050   0.00126   0.00076   2.11288
    A6        2.05811  -0.00021   0.00034  -0.00156  -0.00121   2.05689
    A7        2.08681   0.00001  -0.00018   0.00032   0.00014   2.08696
    A8        2.07645  -0.00006   0.00038  -0.00079  -0.00041   2.07604
    A9        2.11992   0.00005  -0.00020   0.00047   0.00027   2.12018
   A10        2.06543  -0.00025  -0.00007  -0.00080  -0.00087   2.06456
   A11        2.08080   0.00001  -0.00007   0.00017   0.00010   2.08090
   A12        2.13696   0.00024   0.00014   0.00063   0.00077   2.13772
   A13        2.10987   0.00019   0.00018   0.00051   0.00068   2.11056
   A14        2.11562   0.00002   0.00012   0.00010   0.00022   2.11584
   A15        2.05770  -0.00021  -0.00030  -0.00061  -0.00090   2.05679
   A16        2.10186   0.00002  -0.00009   0.00011   0.00003   2.10189
   A17        2.09482  -0.00006   0.00001  -0.00026  -0.00026   2.09456
   A18        2.08650   0.00004   0.00008   0.00015   0.00023   2.08673
   A19        2.12109  -0.00009   0.00019  -0.00058  -0.00038   2.12071
   A20        2.14445   0.00016   0.00003   0.00053   0.00056   2.14501
   A21        2.01764  -0.00007  -0.00023   0.00005  -0.00018   2.01746
   A22        2.03769  -0.00011   0.00028  -0.00081  -0.00052   2.03717
   A23        2.12357   0.00004  -0.00017   0.00036   0.00019   2.12376
   A24        2.12192   0.00008  -0.00012   0.00045   0.00033   2.12225
   A25        2.09291   0.00012  -0.00004   0.00046   0.00043   2.09334
   A26        2.10759  -0.00002   0.00004  -0.00011  -0.00007   2.10752
   A27        2.08268  -0.00009   0.00000  -0.00035  -0.00036   2.08232
   A28        2.11395   0.00002  -0.00017   0.00028   0.00011   2.11406
   A29        2.08676  -0.00001   0.00040  -0.00056  -0.00016   2.08660
   A30        2.08247  -0.00001  -0.00023   0.00028   0.00005   2.08252
   A31        2.08159   0.00012   0.00022   0.00014   0.00036   2.08196
   A32        2.08834  -0.00003  -0.00003  -0.00003  -0.00006   2.08828
   A33        2.11325  -0.00009  -0.00019  -0.00012  -0.00031   2.11295
   A34        2.11764   0.00008   0.00014   0.00014   0.00028   2.11792
   A35        2.06505  -0.00022   0.00033  -0.00164  -0.00131   2.06374
   A36        2.10050   0.00014  -0.00047   0.00150   0.00103   2.10153
   A37        2.13145  -0.00004  -0.00021   0.00014  -0.00006   2.13138
   A38        2.08044   0.00006   0.00010   0.00006   0.00016   2.08060
   A39        2.07130  -0.00002   0.00010  -0.00021  -0.00010   2.07120
   A40        2.07054  -0.00006   0.00008  -0.00036  -0.00027   2.07027
   A41        2.10823   0.00015  -0.00012   0.00095   0.00083   2.10907
   A42        2.10441  -0.00009   0.00003  -0.00059  -0.00056   2.10385
   A43        1.95348   0.00055   0.00121   0.00141   0.00262   1.95610
    D1       -0.00052   0.00000  -0.00005   0.00015   0.00010  -0.00042
    D2        3.14078   0.00000  -0.00004   0.00017   0.00013   3.14091
    D3        3.14140   0.00000  -0.00008   0.00022   0.00014   3.14154
    D4       -0.00049   0.00000  -0.00007   0.00024   0.00018  -0.00031
    D5        0.00053   0.00000  -0.00001  -0.00012  -0.00013   0.00040
    D6       -3.14068   0.00000   0.00005  -0.00026  -0.00021  -3.14089
    D7       -3.14139   0.00000   0.00002  -0.00019  -0.00017  -3.14156
    D8        0.00059  -0.00001   0.00008  -0.00033  -0.00026   0.00033
    D9       -0.00013   0.00000   0.00003  -0.00012  -0.00009  -0.00022
   D10        3.14094   0.00000   0.00001  -0.00020  -0.00019   3.14075
   D11       -3.14143   0.00000   0.00002  -0.00014  -0.00012  -3.14156
   D12       -0.00036   0.00000   0.00000  -0.00022  -0.00022  -0.00059
   D13        0.00075   0.00000   0.00005   0.00005   0.00010   0.00085
   D14       -3.14077   0.00000   0.00013  -0.00015  -0.00002  -3.14079
   D15       -3.14031   0.00000   0.00007   0.00014   0.00021  -3.14010
   D16        0.00135   0.00000   0.00015  -0.00006   0.00008   0.00144
   D17       -3.14108  -0.00001  -0.00001  -0.00068  -0.00069   3.14141
   D18       -0.00039   0.00002   0.00011   0.00155   0.00166   0.00127
   D19       -0.00002  -0.00001  -0.00003  -0.00076  -0.00079  -0.00081
   D20        3.14067   0.00002   0.00009   0.00147   0.00156  -3.14096
   D21       -0.00075   0.00000  -0.00011  -0.00002  -0.00013  -0.00088
   D22        3.13912   0.00001  -0.00006   0.00051   0.00045   3.13956
   D23        3.14077   0.00000  -0.00019   0.00019  -0.00001   3.14077
   D24       -0.00255   0.00001  -0.00015   0.00072   0.00058  -0.00197
   D25       -0.00168   0.00001  -0.00019   0.00061   0.00041  -0.00127
   D26        3.14091   0.00001   0.00011   0.00031   0.00042   3.14133
   D27        3.13998   0.00000  -0.00011   0.00039   0.00028   3.14027
   D28       -0.00061   0.00001   0.00019   0.00010   0.00029  -0.00032
   D29        0.00012   0.00000   0.00009   0.00005   0.00015   0.00026
   D30        3.14132   0.00001   0.00003   0.00020   0.00023   3.14156
   D31       -3.13980  -0.00001   0.00005  -0.00046  -0.00042  -3.14022
   D32        0.00140  -0.00001  -0.00001  -0.00032  -0.00033   0.00107
   D33        0.00064   0.00000   0.00012  -0.00027  -0.00015   0.00048
   D34       -3.14124   0.00000   0.00012  -0.00035  -0.00023  -3.14147
   D35        3.14130   0.00000  -0.00016   0.00000  -0.00016   3.14114
   D36       -0.00058   0.00000  -0.00016  -0.00007  -0.00023  -0.00082
   D37       -0.01256   0.00005  -0.00040   0.00251   0.00211  -0.01045
   D38        3.12998   0.00006  -0.00012   0.00223   0.00211   3.13209
   D39       -0.00104   0.00002  -0.00005   0.00110   0.00105   0.00001
   D40        3.14117   0.00001  -0.00005   0.00082   0.00078  -3.14124
   D41        3.14145  -0.00002  -0.00017  -0.00112  -0.00130   3.14016
   D42        0.00048  -0.00002  -0.00017  -0.00140  -0.00157  -0.00109
   D43        0.00076  -0.00001   0.00001  -0.00062  -0.00061   0.00015
   D44       -3.14145  -0.00001   0.00000  -0.00034  -0.00033   3.14140
   D45       -3.14055  -0.00001   0.00001  -0.00054  -0.00053  -3.14108
   D46        0.00042  -0.00001   0.00000  -0.00026  -0.00026   0.00016
   D47        3.14142   0.00001   0.00003   0.00028   0.00031  -3.14146
   D48       -0.00016   0.00000  -0.00002   0.00018   0.00015  -0.00001
   D49       -0.00046   0.00001   0.00004   0.00020   0.00024  -0.00022
   D50        3.14115   0.00000  -0.00002   0.00010   0.00008   3.14123
   D51        3.14093   0.00001  -0.00004   0.00040   0.00036   3.14128
   D52       -0.00062   0.00001  -0.00004   0.00038   0.00034  -0.00028
   D53       -0.00006   0.00000  -0.00003   0.00012   0.00009   0.00003
   D54        3.14158   0.00000  -0.00003   0.00010   0.00007  -3.14153
   D55        0.00014   0.00000  -0.00004  -0.00001  -0.00005   0.00009
   D56       -3.14150   0.00000  -0.00004  -0.00009  -0.00013   3.14155
   D57       -3.14147   0.00000   0.00002   0.00009   0.00011  -3.14135
   D58        0.00008   0.00000   0.00002   0.00001   0.00003   0.00011
   D59       -0.00026   0.00000   0.00003   0.00007   0.00010  -0.00017
   D60        3.14157   0.00000   0.00005  -0.00010  -0.00005   3.14153
   D61        3.14128   0.00000   0.00003   0.00009   0.00012   3.14140
   D62       -0.00007   0.00000   0.00005  -0.00008  -0.00003  -0.00009
   D63        0.00023   0.00000   0.00001  -0.00013  -0.00012   0.00010
   D64        3.14158   0.00000  -0.00002   0.00004   0.00002  -3.14159
   D65       -3.14132   0.00000   0.00000  -0.00004  -0.00004  -3.14136
   D66        0.00003   0.00000  -0.00002   0.00012   0.00011   0.00014
         Item               Value     Threshold  Converged?
 Maximum Force            0.000629     0.000450     NO 
 RMS     Force            0.000148     0.000300     YES
 Maximum Displacement     0.005503     0.001800     NO 
 RMS     Displacement     0.001166     0.001200     YES
 Predicted change in Energy=-4.085690D-06
 Lowest energy point so far.  Saving SCF results.
 GradGradGradGradGradGradGradGradGradGradGradGradGradGradGradGradGradGrad

 Leave Link  103 at Thu Jan 09 22:21:45 2020, MaxMem=   134217728 cpu:         1.0
 (Enter E:\Gaussian\G09W\l202.exe)
                          Input orientation:                          
 ---------------------------------------------------------------------
 Center     Atomic      Atomic             Coordinates (Angstroms)
 Number     Number       Type             X           Y           Z
 ---------------------------------------------------------------------
      1          6           0       -3.745473    0.642838    0.000278
      2          6           0       -4.782598    1.558815    0.000059
      3          6           0       -6.118408    1.138669    0.000549
      4          6           0       -6.417664   -0.255549    0.001017
      5          6           0       -5.338834   -1.173857    0.002032
      6          6           0       -4.031731   -0.732206    0.001514
      7          1           0       -2.716406    0.982887   -0.000153
      8          1           0       -4.587265    2.623988   -0.000254
      9          1           0       -5.511843   -2.244873    0.004305
     10          1           0       -3.223295   -1.454259    0.002347
     11          6           0       -7.780218   -0.675060    0.000520
     12          6           0       -7.184305    2.153420    0.001370
     13          6           0       -8.849185    0.266675    0.001110
     14          6           0       -8.567534    1.658512    0.001626
     15          6           0      -10.196129   -0.167559    0.000752
     16          6           0       -9.628559    2.573060    0.001967
     17          6           0      -11.205605    0.768672    0.001177
     18          1           0      -10.416740   -1.225296    0.000014
     19          6           0      -10.944308    2.148268    0.001852
     20          1           0       -9.393900    3.630155    0.002302
     21          1           0      -11.757729    2.862036    0.002179
     22         35           0      -13.029802    0.177848    0.000622
     23          8           0       -6.928723    3.365290    0.000301
     24          8           0       -8.146805   -1.971636    0.000613
     25          1           0       -7.385352   -2.563655   -0.008296
 ---------------------------------------------------------------------
                    Distance matrix (angstroms):
                    1          2          3          4          5
     1  C    0.000000
     2  C    1.383706   0.000000
     3  C    2.424184   1.400325   0.000000
     4  C    2.819167   2.442408   1.425973   0.000000
     5  C    2.416440   2.788709   2.440392   1.416745   0.000000
     6  C    1.404525   2.410929   2.802570   2.433080   1.379701
     7  H    1.083796   2.144958   3.405567   3.902953   3.395391
     8  H    2.152573   1.082936   2.133207   3.412051   3.871497
     9  H    3.385107   3.872965   3.437484   2.185849   1.084902
    10  H    2.161131   3.392646   3.886510   3.411876   2.134041
    11  C    4.244529   3.738439   2.459924   1.425673   2.491818
    12  C    3.755985   2.474217   1.471685   2.528017   3.804804
    13  C    5.117556   4.266938   2.866621   2.486969   3.794430
    14  C    4.927867   3.786250   2.503689   2.878467   4.294976
    15  C    6.501362   5.682137   4.281827   3.779489   4.960439
    16  C    6.191644   4.950963   3.791917   4.279120   5.695711
    17  C    7.461194   6.471425   5.100635   4.896265   6.180002
    18  H    6.927894   6.284491   4.905505   4.114974   5.078167
    19  C    7.354560   6.189841   4.930375   5.125314   6.515969
    20  H    6.389742   5.055152   4.115380   4.894556   6.286660
    21  H    8.313910   7.095833   5.896773   6.183497   7.582259
    22  Br   9.295966   8.362024   6.977861   6.626327   7.808848
    23  O    4.188655   2.805210   2.369484   3.656728   4.809533
    24  O    5.119296   4.876676   3.713272   2.436162   2.919102
    25  H    4.850813   4.875362   3.913110   2.502770   2.473839
                    6          7          8          9         10
     6  C    0.000000
     7  H    2.161395   0.000000
     8  H    3.401861   2.488640   0.000000
     9  H    2.116341   4.270003   4.955873   0.000000
    10  H    1.083942   2.489302   4.300293   2.421265   0.000000
    11  C    3.748923   5.328320   4.591151   2.758597   4.623062
    12  C    4.273822   4.618687   2.639327   4.705541   5.357700
    13  C    4.919922   6.174460   4.870410   4.176810   5.883218
    14  C    5.127285   5.890007   4.095691   4.957184   6.184678
    15  C    6.190205   7.567681   6.265149   5.124235   7.090558
    16  C    6.499943   7.092708   5.041551   6.337179   7.566155
    17  C    7.329196   8.491902   6.873472   6.442080   8.286054
    18  H    6.404020   8.010694   6.985682   5.009748   7.197088
    19  C    7.488715   8.310024   6.374818   6.986514   8.520108
    20  H    6.912528   7.183103   4.910816   7.041756   7.995476
    21  H    8.521128   9.234540   7.174414   8.067938   9.563836
    22  Br   9.043975  10.344769   8.789769   7.898690   9.941396
    23  O    5.018171   4.839366   2.456003   5.786320   6.079330
    24  O    4.297676   6.182107   5.812924   2.649094   4.950619
    25  H    3.821135   5.863198   5.894149   1.900478   4.307388
                   11         12         13         14         15
    11  C    0.000000
    12  C    2.890573   0.000000
    13  C    1.424625   2.516274   0.000000
    14  C    2.462809   1.469101   1.420049   0.000000
    15  C    2.468640   3.802371   1.415209   2.446805   0.000000
    16  C    3.737198   2.480015   2.434509   1.400775   2.798772
    17  C    3.717208   4.253044   2.409298   2.784104   1.376797
    18  H    2.693326   4.675934   2.164071   3.425772   1.080499
    19  C    4.240595   3.760007   2.816013   2.426708   2.433686
    20  H    4.597700   2.657642   3.407302   2.137815   3.881520
    21  H    5.322748   4.627996   3.898144   3.409664   3.408378
    22  Br   5.318419   6.170310   4.181560   4.701511   2.854647
    23  O    4.129102   1.238529   3.645490   2.366178   4.812169
    24  O    1.347403   4.235858   2.345927   3.654448   2.730279
    25  H    1.929452   4.721367   3.186482   4.384558   3.693485
                   16         17         18         19         20
    16  C    0.000000
    17  C    2.396433   0.000000
    18  H    3.879270   2.144346   0.000000
    19  C    1.382622   1.404123   3.414567   0.000000
    20  H    1.082827   3.386792   4.962016   2.144703   0.000000
    21  H    2.148691   2.164951   4.301690   1.082182   2.485496
    22  Br   4.159988   1.917490   2.965958   2.869119   5.013802
    23  O    2.813671   5.003414   5.765392   4.195959   2.479366
    24  O    4.780152   4.106768   2.389483   4.979923   5.738929
    25  H    5.605169   5.069401   3.313697   5.904955   6.511348
                   21         22         23         24         25
    21  H    0.000000
    22  Br   2.970360   0.000000
    23  O    4.855159   6.883529   0.000000
    24  O    6.033503   5.335161   5.474167   0.000000
    25  H    6.968207   6.275009   5.946510   0.964560   0.000000
 Stoichiometry    C14H8BrO2(2)
 Framework group  C1[X(C14H8BrO2)]
 Deg. of freedom    69
 Full point group                 C1      NOp   1
 RotChk:  IX=0 Diff= 4.97D-05
 Largest Abelian subgroup         C1      NOp   1
 Largest concise Abelian subgroup C1      NOp   1
                         Standard orientation:                         
 ---------------------------------------------------------------------
 Center     Atomic      Atomic             Coordinates (Angstroms)
 Number     Number       Type             X           Y           Z
 ---------------------------------------------------------------------
      1          6           0       -5.068347    0.090232    0.000606
      2          6           0       -4.030729    1.005650    0.000825
      3          6           0       -2.695145    0.584785    0.000335
      4          6           0       -2.396641   -0.809594   -0.000133
      5          6           0       -3.475966   -1.727320   -0.001148
      6          6           0       -4.782830   -1.284965   -0.000629
      7          1           0       -6.097231    0.430837    0.001037
      8          1           0       -4.225487    2.070929    0.001138
      9          1           0       -3.303534   -2.798430   -0.003421
     10          1           0       -5.591655   -2.006583   -0.001463
     11          6           0       -1.034313   -1.229839    0.000364
     12          6           0       -1.628702    1.598962   -0.000486
     13          6           0        0.035162   -0.288680   -0.000225
     14          6           0       -0.245739    1.103309   -0.000741
     15          6           0        1.381871   -0.723639    0.000133
     16          6           0        0.815778    2.017284   -0.001082
     17          6           0        2.391852    0.212047   -0.000293
     18          1           0        1.601912   -1.781495    0.000870
     19          6           0        2.131298    1.591784   -0.000967
     20          1           0        0.581689    3.074505   -0.001417
     21          1           0        2.945103    2.305113   -0.001295
     22         35           0        4.215730   -0.379760    0.000262
     23          8           0       -1.883631    2.810970    0.000583
     24          8           0       -0.668425   -2.526612    0.000272
     25          1           0       -1.430197   -3.118221    0.009181
 ---------------------------------------------------------------------
 Rotational constants (GHZ):      0.9831223      0.1775054      0.1503579
 Leave Link  202 at Thu Jan 09 22:21:45 2020, MaxMem=   134217728 cpu:         0.0
 (Enter E:\Gaussian\G09W\l301.exe)
 Standard basis: 6-311G(d) (5D, 7F)
 Ernie: Thresh=  0.10000D-02 Tol=  0.10000D-05 Strict=F.
 There are   375 symmetry adapted cartesian basis functions of A   symmetry.
 There are   356 symmetry adapted basis functions of A   symmetry.
   356 basis functions,   642 primitive gaussians,   375 cartesian basis functions
    72 alpha electrons       71 beta electrons
       nuclear repulsion energy      1393.1369863092 Hartrees.
 IExCor=  402 DFT=T Ex+Corr=B3LYP ExCW=0 ScaHFX=  0.200000
 ScaDFX=  0.800000  0.720000  1.000000  0.810000 ScalE2=  1.000000  1.000000
 IRadAn=      0 IRanWt=     -1 IRanGd=            0 ICorTp=0 IEmpDi=141
 NAtoms=   25 NActive=   25 NUniq=   25 SFac= 1.00D+00 NAtFMM=   60 NAOKFM=F Big=F
 Integral buffers will be    262144 words long.
 Raffenetti 2 integral format.
 Two-electron integral symmetry is turned on.
 R6Disp:  Grimme-D3(BJ) Dispersion energy=       -0.0633837608 Hartrees.
 Nuclear repulsion after empirical dispersion term =     1393.0736025484 Hartrees.
 ------------------------------------------------------------------------------
 Polarizable Continuum Model (PCM)
 =================================
 Model                : PCM (using non-symmetric T matrix).
 Atomic radii         : UFF (Universal Force Field).
 Polarization charges : Total charges.
 Charge compensation  : None.
 Solution method      : On-the-fly selection.
 Cavity type          : Scaled VdW (van der Waals Surface) (Alpha=1.100).
 Cavity algorithm     : GePol (No added spheres)
                        Default sphere list used, NSphG=   25.
                        Lebedev-Laikov grids with approx.  5.0 points / Ang**2.
                        Smoothing algorithm: Karplus/York (Gamma=1.0000).
                        Polarization charges: spherical gaussians, with
                                              point-specific exponents (IZeta= 3).
                        Self-potential: point-specific (ISelfS= 7).
                        Self-field    : sphere-specific E.n sum rule (ISelfD= 2).
 1st derivatives      : Analytical E(r).r(x)/FMM algorithm (CHGder, D1EAlg=3).
                        Cavity 1st derivative terms included.
 Solvent              : Acetonitrile, Eps=  35.688000 Eps(inf)=   1.806874
 ------------------------------------------------------------------------------
 GePol: Number of generator spheres                  =      25
 GePol: Total number of spheres                      =      25
 GePol: Number of exposed spheres                    =      25 (100.00%)
 GePol: Number of points                             =    2189
 GePol: Average weight of points                     =       0.13
 GePol: Minimum weight of points                     =   0.35D-09
 GePol: Maximum weight of points                     =    0.20577
 GePol: Number of points with low weight             =     138
 GePol: Fraction of low-weight points (<1% of avg)   =       6.30%
 GePol: Cavity surface area                          =    281.119 Ang**2
 GePol: Cavity volume                                =    308.160 Ang**3
 Leave Link  301 at Thu Jan 09 22:21:46 2020, MaxMem=   134217728 cpu:         0.0
 (Enter E:\Gaussian\G09W\l302.exe)
 NPDir=0 NMtPBC=     1 NCelOv=     1 NCel=       1 NClECP=     1 NCelD=      1
         NCelK=      1 NCelE2=     1 NClLst=     1 CellRange=     0.0.
 One-electron integrals computed using PRISM.
 NBasis=   356 RedAO= T EigKep=  8.57D-05  NBF=   356
 NBsUse=   356 1.00D-06 EigRej= -1.00D+00 NBFU=   356
 Precomputing XC quadrature grid using
 IXCGrd= 4 IRadAn=           0 IRanWt=          -1 IRanGd=           0 AccXCQ= 0.00D+00.
 Generated NRdTot=       0 NPtTot=           0 NUsed=           0 NTot=          16
 NSgBfM=   363   363   364   364   364 MxSgAt=    25 MxSgA2=    25.
 Leave Link  302 at Thu Jan 09 22:21:48 2020, MaxMem=   134217728 cpu:         2.0
 (Enter E:\Gaussian\G09W\l303.exe)
 DipDrv:  MaxL=1.
 Leave Link  303 at Thu Jan 09 22:21:48 2020, MaxMem=   134217728 cpu:         0.0
 (Enter E:\Gaussian\G09W\l401.exe)
 Initial guess from the checkpoint file:  "E:\Gaussian file\2-BrHAQ opt.chk"
 B after Tr=     0.000000    0.000000    0.000000
         Rot=    1.000000    0.000026    0.000033   -0.000005 Ang=   0.00 deg.
 Guess basis will be translated and rotated to current coordinates.
 JPrj=2 DoOrth=T DoCkMO=T.
 Initial guess <Sx>= 0.0000 <Sy>= 0.0000 <Sz>= 0.5000 <S**2>= 0.7730 S= 0.5114
 Leave Link  401 at Thu Jan 09 22:21:50 2020, MaxMem=   134217728 cpu:         2.0
 (Enter E:\Gaussian\G09W\l502.exe)
 UHF open shell SCF:
 Using DIIS extrapolation, IDIIS=  1040.
 Integral symmetry usage will be decided dynamically.
 IVT=      444890 IEndB=      444890 NGot=   134217728 MDV=   133930479
 LenX=   133930479 LenY=   133789413
 Requested convergence on RMS density matrix=1.00D-08 within 128 cycles.
 Requested convergence on MAX density matrix=1.00D-06.
 Requested convergence on             energy=1.00D-06.
 No special actions if energy rises.
 Fock matrices will be formed incrementally for  20 cycles.

 Cycle   1  Pass 1  IDiag  1:
 FoFJK:  IHMeth= 1 ICntrl=       0 DoSepK=F KAlg= 0 I1Cent=   0 FoldK=F
 IRaf= 780000000 NMat=   1 IRICut=       1 DoRegI=T DoRafI=F ISym2E= 0.
 FoFCou: FMM=F IPFlag=           0 FMFlag=      100000 FMFlg1=           0
         NFxFlg=           0 DoJE=F BraDBF=F KetDBF=F FulRan=T
         wScrn=  0.000000 ICntrl=       0 IOpCl=  1 I1Cent=           0 NGrid=           0
         NMat0=    1 NMatS0=      1 NMatT0=    0 NMatD0=    1 NMtDS0=    0 NMtDT0=    0
 Symmetry not used in FoFCou.
 Inv3:  Mode=1 IEnd=    14375163.
 Iteration    1 A*A^-1 deviation from unit magnitude is 2.44D-15 for   1297.
 Iteration    1 A*A^-1 deviation from orthogonality  is 2.08D-15 for   1386   1177.
 Iteration    1 A^-1*A deviation from unit magnitude is 2.44D-15 for   1552.
 Iteration    1 A^-1*A deviation from orthogonality  is 1.25D-13 for   1602   1568.
 E= -3263.12403886548    
 DIIS: error= 5.74D-05 at cycle   1 NSaved=   1.
 NSaved= 1 IEnMin= 1 EnMin= -3263.12403886548     IErMin= 1 ErrMin= 5.74D-05
 ErrMax= 5.74D-05  0.00D+00 EMaxC= 1.00D-01 BMatC= 1.32D-05 BMatP= 1.32D-05
 IDIUse=1 WtCom= 1.00D+00 WtEn= 0.00D+00
 Coeff-Com:  0.100D+01
 Coeff:      0.100D+01
 Gap=     0.729 Goal=   None    Shift=    0.000
 Gap=     0.797 Goal=   None    Shift=    0.000
 RMSDP=2.13D-05 MaxDP=9.07D-04              OVMax= 5.21D-04

 Cycle   2  Pass 1  IDiag  1:
 RMSU=  2.09D-05    CP:  1.00D+00
 E= -3263.12404274887     Delta-E=       -0.000003883391 Rises=F Damp=F
 DIIS: error= 5.20D-05 at cycle   2 NSaved=   2.
 NSaved= 2 IEnMin= 2 EnMin= -3263.12404274887     IErMin= 2 ErrMin= 5.20D-05
 ErrMax= 5.20D-05  0.00D+00 EMaxC= 1.00D-01 BMatC= 2.49D-06 BMatP= 1.32D-05
 IDIUse=1 WtCom= 1.00D+00 WtEn= 0.00D+00
 Coeff-Com:  0.191D+00 0.809D+00
 Coeff:      0.191D+00 0.809D+00
 Gap=     0.112 Goal=   None    Shift=    0.000
 Gap=     0.133 Goal=   None    Shift=    0.000
 RMSDP=8.51D-06 MaxDP=3.82D-04 DE=-3.88D-06 OVMax= 6.47D-04

 Cycle   3  Pass 1  IDiag  1:
 RMSU=  6.93D-06    CP:  1.00D+00  7.84D-01
 E= -3263.12404216658     Delta-E=        0.000000582287 Rises=F Damp=F
 DIIS: error= 8.89D-05 at cycle   3 NSaved=   3.
 NSaved= 3 IEnMin= 2 EnMin= -3263.12404274887     IErMin= 2 ErrMin= 5.20D-05
 ErrMax= 8.89D-05  0.00D+00 EMaxC= 1.00D-01 BMatC= 5.66D-06 BMatP= 2.49D-06
 IDIUse=1 WtCom= 1.00D+00 WtEn= 0.00D+00
 Coeff-Com: -0.214D-01 0.613D+00 0.409D+00
 Coeff:     -0.214D-01 0.613D+00 0.409D+00
 Gap=     0.112 Goal=   None    Shift=    0.000
 Gap=     0.133 Goal=   None    Shift=    0.000
 RMSDP=6.59D-06 MaxDP=3.03D-04 DE= 5.82D-07 OVMax= 3.11D-04

 Cycle   4  Pass 1  IDiag  1:
 RMSU=  1.76D-06    CP:  1.00D+00  9.67D-01  2.99D-01
 E= -3263.12404326307     Delta-E=       -0.000001096482 Rises=F Damp=F
 DIIS: error= 7.02D-06 at cycle   4 NSaved=   4.
 NSaved= 4 IEnMin= 4 EnMin= -3263.12404326307     IErMin= 4 ErrMin= 7.02D-06
 ErrMax= 7.02D-06  0.00D+00 EMaxC= 1.00D-01 BMatC= 4.83D-08 BMatP= 2.49D-06
 IDIUse=1 WtCom= 1.00D+00 WtEn= 0.00D+00
 Coeff-Com: -0.152D-01 0.216D+00 0.172D+00 0.628D+00
 Coeff:     -0.152D-01 0.216D+00 0.172D+00 0.628D+00
 Gap=     0.112 Goal=   None    Shift=    0.000
 Gap=     0.133 Goal=   None    Shift=    0.000
 RMSDP=6.68D-07 MaxDP=2.27D-05 DE=-1.10D-06 OVMax= 4.29D-05

 Cycle   5  Pass 1  IDiag  1:
 RMSU=  3.54D-07    CP:  1.00D+00  9.59D-01  3.43D-01  7.50D-01
 E= -3263.12404327108     Delta-E=       -0.000000008015 Rises=F Damp=F
 DIIS: error= 2.96D-06 at cycle   5 NSaved=   5.
 NSaved= 5 IEnMin= 5 EnMin= -3263.12404327108     IErMin= 5 ErrMin= 2.96D-06
 ErrMax= 2.96D-06  0.00D+00 EMaxC= 1.00D-01 BMatC= 1.36D-08 BMatP= 4.83D-08
 IDIUse=1 WtCom= 1.00D+00 WtEn= 0.00D+00
 Coeff-Com: -0.636D-02 0.598D-01 0.592D-01 0.373D+00 0.514D+00
 Coeff:     -0.636D-02 0.598D-01 0.592D-01 0.373D+00 0.514D+00
 Gap=     0.112 Goal=   None    Shift=    0.000
 Gap=     0.133 Goal=   None    Shift=    0.000
 RMSDP=1.75D-07 MaxDP=6.75D-06 DE=-8.02D-09 OVMax= 4.26D-05

 Cycle   6  Pass 1  IDiag  1:
 RMSU=  1.55D-07    CP:  1.00D+00  9.60D-01  3.45D-01  7.88D-01  8.81D-01
 E= -3263.12404327501     Delta-E=       -0.000000003931 Rises=F Damp=F
 DIIS: error= 1.19D-06 at cycle   6 NSaved=   6.
 NSaved= 6 IEnMin= 6 EnMin= -3263.12404327501     IErMin= 6 ErrMin= 1.19D-06
 ErrMax= 1.19D-06  0.00D+00 EMaxC= 1.00D-01 BMatC= 1.07D-09 BMatP= 1.36D-08
 IDIUse=1 WtCom= 1.00D+00 WtEn= 0.00D+00
 Coeff-Com:  0.546D-03-0.180D-01-0.887D-02 0.755D-02 0.180D+00 0.839D+00
 Coeff:      0.546D-03-0.180D-01-0.887D-02 0.755D-02 0.180D+00 0.839D+00
 Gap=     0.112 Goal=   None    Shift=    0.000
 Gap=     0.133 Goal=   None    Shift=    0.000
 RMSDP=1.02D-07 MaxDP=5.33D-06 DE=-3.93D-09 OVMax= 2.97D-05

 Cycle   7  Pass 1  IDiag  1:
 RMSU=  6.90D-08    CP:  1.00D+00  9.60D-01  3.47D-01  8.03D-01  1.06D+00
                    CP:  1.16D+00
 E= -3263.12404327580     Delta-E=       -0.000000000790 Rises=F Damp=F
 DIIS: error= 8.22D-07 at cycle   7 NSaved=   7.
 NSaved= 7 IEnMin= 7 EnMin= -3263.12404327580     IErMin= 7 ErrMin= 8.22D-07
 ErrMax= 8.22D-07  0.00D+00 EMaxC= 1.00D-01 BMatC= 4.59D-10 BMatP= 1.07D-09
 IDIUse=1 WtCom= 1.00D+00 WtEn= 0.00D+00
 Coeff-Com:  0.206D-02-0.274D-01-0.217D-01-0.959D-01-0.231D-01 0.489D+00
 Coeff-Com:  0.678D+00
 Coeff:      0.206D-02-0.274D-01-0.217D-01-0.959D-01-0.231D-01 0.489D+00
 Coeff:      0.678D+00
 Gap=     0.112 Goal=   None    Shift=    0.000
 Gap=     0.133 Goal=   None    Shift=    0.000
 RMSDP=6.45D-08 MaxDP=3.40D-06 DE=-7.90D-10 OVMax= 2.09D-05

 Cycle   8  Pass 1  IDiag  1:
 RMSU=  3.68D-08    CP:  1.00D+00  9.60D-01  3.48D-01  8.18D-01  1.13D+00
                    CP:  1.40D+00  1.10D+00
 E= -3263.12404327607     Delta-E=       -0.000000000270 Rises=F Damp=F
 DIIS: error= 5.06D-07 at cycle   8 NSaved=   8.
 NSaved= 8 IEnMin= 8 EnMin= -3263.12404327607     IErMin= 8 ErrMin= 5.06D-07
 ErrMax= 5.06D-07  0.00D+00 EMaxC= 1.00D-01 BMatC= 7.80D-11 BMatP= 4.59D-10
 IDIUse=1 WtCom= 1.00D+00 WtEn= 0.00D+00
 Coeff-Com:  0.609D-03-0.444D-02-0.544D-02-0.394D-01-0.617D-01-0.902D-01
 Coeff-Com:  0.252D+00 0.948D+00
 Coeff:      0.609D-03-0.444D-02-0.544D-02-0.394D-01-0.617D-01-0.902D-01
 Coeff:      0.252D+00 0.948D+00
 Gap=     0.112 Goal=   None    Shift=    0.000
 Gap=     0.133 Goal=   None    Shift=    0.000
 RMSDP=4.26D-08 MaxDP=2.60D-06 DE=-2.70D-10 OVMax= 1.24D-05

 Cycle   9  Pass 1  IDiag  1:
 RMSU=  1.81D-08    CP:  1.00D+00  9.60D-01  3.48D-01  8.24D-01  1.20D+00
                    CP:  1.52D+00  1.41D+00  1.25D+00
 E= -3263.12404327615     Delta-E=       -0.000000000079 Rises=F Damp=F
 DIIS: error= 2.39D-07 at cycle   9 NSaved=   9.
 NSaved= 9 IEnMin= 9 EnMin= -3263.12404327615     IErMin= 9 ErrMin= 2.39D-07
 ErrMax= 2.39D-07  0.00D+00 EMaxC= 1.00D-01 BMatC= 3.68D-11 BMatP= 7.80D-11
 IDIUse=1 WtCom= 1.00D+00 WtEn= 0.00D+00
 Coeff-Com: -0.635D-04 0.324D-02 0.170D-02-0.325D-02-0.306D-01-0.154D+00
 Coeff-Com:  0.114D-01 0.579D+00 0.593D+00
 Coeff:     -0.635D-04 0.324D-02 0.170D-02-0.325D-02-0.306D-01-0.154D+00
 Coeff:      0.114D-01 0.579D+00 0.593D+00
 Gap=     0.112 Goal=   None    Shift=    0.000
 Gap=     0.133 Goal=   None    Shift=    0.000
 RMSDP=1.59D-08 MaxDP=7.90D-07 DE=-7.91D-11 OVMax= 3.82D-06

 Cycle  10  Pass 1  IDiag  1:
 RMSU=  7.48D-09    CP:  1.00D+00  9.60D-01  3.49D-01  8.22D-01  1.21D+00
                    CP:  1.56D+00  1.49D+00  1.43D+00  7.97D-01
 E= -3263.12404327606     Delta-E=        0.000000000089 Rises=F Damp=F
 DIIS: error= 1.12D-07 at cycle  10 NSaved=  10.
 NSaved=10 IEnMin= 9 EnMin= -3263.12404327615     IErMin=10 ErrMin= 1.12D-07
 ErrMax= 1.12D-07  0.00D+00 EMaxC= 1.00D-01 BMatC= 5.51D-12 BMatP= 3.68D-11
 IDIUse=1 WtCom= 1.00D+00 WtEn= 0.00D+00
 Coeff-Com: -0.154D-03 0.259D-02 0.218D-02 0.561D-02-0.458D-02-0.648D-01
 Coeff-Com: -0.413D-01 0.128D+00 0.294D+00 0.678D+00
 Coeff:     -0.154D-03 0.259D-02 0.218D-02 0.561D-02-0.458D-02-0.648D-01
 Coeff:     -0.413D-01 0.128D+00 0.294D+00 0.678D+00
 Gap=     0.112 Goal=   None    Shift=    0.000
 Gap=     0.133 Goal=   None    Shift=    0.000
 RMSDP=5.49D-09 MaxDP=2.47D-07 DE= 8.91D-11 OVMax= 9.09D-07

 Error on total polarization charges =  0.01434
 SCF Done:  E(UB3LYP) =  -3263.12404328     A.U. after   10 cycles
            NFock= 10  Conv=0.55D-08     -V/T= 2.0017
 <Sx>= 0.0000 <Sy>= 0.0000 <Sz>= 0.5000 <S**2>= 0.7730 S= 0.5114
 <L.S>= 0.000000000000E+00
 KE= 3.257440445484D+03 PE=-1.054447656424D+04 EE= 2.630838472928D+03
 Annihilation of the first spin contaminant:
 S**2 before annihilation     0.7730,   after     0.7504
 Leave Link  502 at Thu Jan 09 22:34:26 2020, MaxMem=   134217728 cpu:       756.0
 (Enter E:\Gaussian\G09W\l701.exe)
 Compute integral first derivatives.
 ... and contract with generalized density number  0.
 R6Disp: Adding Grimme-D3(BJ) dispersion energy 1st derivatives to the gradient.
 D1PCM: PCM CHGder 1st derivatives, ID1Alg=3 FixD1E=F DoIter=F DoCFld=F I1PDM=0.
 GePol: Maximum number of non-zero 1st derivatives   =     349
 Leave Link  701 at Thu Jan 09 22:34:48 2020, MaxMem=   134217728 cpu:        21.0
 (Enter E:\Gaussian\G09W\l702.exe)
 L702 exits ... SP integral derivatives will be done elsewhere.
 Leave Link  702 at Thu Jan 09 22:34:48 2020, MaxMem=   134217728 cpu:         0.0
 (Enter E:\Gaussian\G09W\l703.exe)
 Compute integral first derivatives, UseDBF=F ICtDFT=           0.
 Integral derivatives from FoFJK, PRISM(SPDF).
 Calling FoFJK, ICntrl=      2127 FMM=F ISym2X=0 I1Cent= 0 IOpClX= 1 NMat=1 NMatS=1 NMatT=0.
 FoFJK:  IHMeth= 1 ICntrl=    2127 DoSepK=F KAlg= 0 I1Cent=   0 FoldK=F
 IRaf=         0 NMat=   1 IRICut=       1 DoRegI=T DoRafI=F ISym2E= 0.
 FoFCou: FMM=F IPFlag=           0 FMFlag=      100000 FMFlg1=         800
         NFxFlg=           0 DoJE=F BraDBF=F KetDBF=F FulRan=T
         wScrn=  0.000000 ICntrl=    2127 IOpCl=  1 I1Cent=           0 NGrid=           0
         NMat0=    1 NMatS0=      1 NMatT0=    0 NMatD0=    1 NMtDS0=    0 NMtDT0=    0
 Symmetry not used in FoFCou.
 Leave Link  703 at Thu Jan 09 22:38:20 2020, MaxMem=   134217728 cpu:       212.0
 (Enter E:\Gaussian\G09W\l716.exe)
 Dipole        =-1.29459970D+00-2.20721207D+00 5.72960264D-03
 ***** Axes restored to original set *****
 -------------------------------------------------------------------
 Center     Atomic                   Forces (Hartrees/Bohr)
 Number     Number              X              Y              Z
 -------------------------------------------------------------------
      1        6           0.000052549    0.000031100   -0.000005780
      2        6           0.000102618    0.000006977    0.000005128
      3        6           0.000052509   -0.000241444    0.000063819
      4        6          -0.000031202    0.000049009   -0.000013707
      5        6          -0.000019420   -0.000037257    0.000004730
      6        6          -0.000004150   -0.000015204   -0.000000070
      7        1           0.000015367   -0.000020575    0.000000650
      8        1          -0.000030831    0.000023588   -0.000003307
      9        1          -0.000033372   -0.000035324   -0.000014664
     10        1           0.000002096   -0.000024582    0.000001668
     11        6          -0.000027942   -0.000121009    0.000029948
     12        6           0.000117761    0.000572165   -0.000209449
     13        6           0.000066600    0.000077827    0.000016838
     14        6          -0.000137949   -0.000171985    0.000056945
     15        6          -0.000045270   -0.000015341   -0.000002477
     16        6          -0.000086630    0.000030581    0.000004012
     17        6           0.000039335    0.000016387   -0.000001544
     18        1          -0.000019467   -0.000005772    0.000002480
     19        6          -0.000021486    0.000060058   -0.000001055
     20        1           0.000059605    0.000023032   -0.000000824
     21        1          -0.000019779   -0.000000352   -0.000001319
     22       35          -0.000023134    0.000008244    0.000002367
     23        8          -0.000051083   -0.000261267    0.000079398
     24        8           0.000024184    0.000074555   -0.000066320
     25        1           0.000019089   -0.000023411    0.000052534
 -------------------------------------------------------------------
 Cartesian Forces:  Max     0.000572165 RMS     0.000094378
 Leave Link  716 at Thu Jan 09 22:38:21 2020, MaxMem=   134217728 cpu:         0.0
 (Enter E:\Gaussian\G09W\l103.exe)

 GradGradGradGradGradGradGradGradGradGradGradGradGradGradGradGradGradGrad
 Berny optimization.
 Using GEDIIS/GDIIS optimizer.
 FormGI is forming the generalized inverse of G from B-inverse, IUseBI=4.
 Internal  Forces:  Max     0.000266266 RMS     0.000044253
 Search for a local minimum.
 Step number   3 out of a maximum of  146
 All quantities printed in internal units (Hartrees-Bohrs-Radians)
 RMS Force = .44253D-04 SwitMx=.10000D-02 MixMth= 2
 Mixed Optimization -- En-DIIS/RFO-DIIS
 Swapping is turned off.
 Update second derivatives using D2CorX and points    1    2    3
 DE= -4.55D-06 DEPred=-4.09D-06 R= 1.11D+00
 TightC=F SS=  1.41D+00  RLast= 7.13D-03 DXNew= 5.0454D-01 2.1392D-02
 Trust test= 1.11D+00 RLast= 7.13D-03 DXMaxT set to 3.00D-01
 ITU=  1  1  0
     Eigenvalues ---    0.01201   0.01407   0.01624   0.01689   0.01711
     Eigenvalues ---    0.01759   0.01818   0.01841   0.01869   0.02033
     Eigenvalues ---    0.02071   0.02088   0.02102   0.02131   0.02154
     Eigenvalues ---    0.02168   0.02183   0.02187   0.02201   0.02218
     Eigenvalues ---    0.02241   0.02260   0.13844   0.16000   0.16000
     Eigenvalues ---    0.16000   0.16000   0.16000   0.16004   0.16912
     Eigenvalues ---    0.17751   0.21789   0.22306   0.22765   0.23607
     Eigenvalues ---    0.23699   0.24616   0.24738   0.25000   0.25000
     Eigenvalues ---    0.25000   0.25001   0.26315   0.32515   0.34640
     Eigenvalues ---    0.35375   0.35478   0.35494   0.35596   0.35615
     Eigenvalues ---    0.35675   0.35875   0.37396   0.39578   0.40762
     Eigenvalues ---    0.41044   0.41099   0.42095   0.43453   0.43859
     Eigenvalues ---    0.44457   0.45047   0.47165   0.47345   0.48354
     Eigenvalues ---    0.49369   0.54328   0.56838   0.79333
 En-DIIS/RFO-DIIS IScMMF=        0 using points:     3    2    1
 RFO step:  Lambda=-6.04723341D-07.
 NNeg= 0 NP= 3 Switch=  2.50D-03 Rises=F DC=  6.86D-05 SmlDif=  1.00D-05
 RMS Error=  0.1282440442D-03 NUsed= 3 EDIIS=F
 DidBck=F Rises=F RFO-DIIS coefs:    1.14078   -0.14265    0.00188
 Iteration  1 RMS(Cart)=  0.00088372 RMS(Int)=  0.00000139
 Iteration  2 RMS(Cart)=  0.00000144 RMS(Int)=  0.00000077
 Iteration  3 RMS(Cart)=  0.00000000 RMS(Int)=  0.00000077
 ITry= 1 IFail=0 DXMaxC= 4.56D-03 DCOld= 1.00D+10 DXMaxT= 3.00D-01 DXLimC= 3.00D+00 Rises=F
 Variable       Old X    -DE/DX   Delta X   Delta X   Delta X     New X
                                 (Linear)    (Quad)   (Total)
    R1        2.61483   0.00004   0.00003   0.00007   0.00010   2.61493
    R2        2.65417   0.00006  -0.00004   0.00010   0.00007   2.65423
    R3        2.04808   0.00001   0.00001   0.00003   0.00004   2.04811
    R4        2.64623   0.00010   0.00008   0.00022   0.00031   2.64654
    R5        2.04645   0.00002   0.00000   0.00006   0.00006   2.04651
    R6        2.69470  -0.00002   0.00001  -0.00012  -0.00011   2.69459
    R7        2.78108   0.00023   0.00018   0.00084   0.00102   2.78210
    R8        2.67726   0.00002   0.00011   0.00006   0.00017   2.67743
    R9        2.69413  -0.00001   0.00015   0.00003   0.00018   2.69431
   R10        2.60726   0.00005   0.00002   0.00009   0.00011   2.60737
   R11        2.05017   0.00003   0.00000   0.00009   0.00008   2.05025
   R12        2.04835   0.00001   0.00001   0.00004   0.00005   2.04841
   R13        2.69215   0.00006   0.00008   0.00017   0.00025   2.69240
   R14        2.54622  -0.00006   0.00005  -0.00017  -0.00012   2.54610
   R15        2.77620   0.00021   0.00017   0.00079   0.00096   2.77716
   R16        2.34048  -0.00027  -0.00011  -0.00058  -0.00069   2.33979
   R17        2.68350  -0.00001  -0.00001  -0.00008  -0.00009   2.68342
   R18        2.67436   0.00007   0.00006   0.00015   0.00021   2.67456
   R19        2.64708   0.00009   0.00007   0.00019   0.00025   2.64733
   R20        2.60177   0.00002   0.00005   0.00006   0.00012   2.60188
   R21        2.04185   0.00002   0.00000   0.00003   0.00003   2.04188
   R22        2.61278   0.00002   0.00004   0.00004   0.00008   2.61285
   R23        2.04625   0.00003   0.00000   0.00008   0.00008   2.04632
   R24        2.65341   0.00002   0.00001   0.00004   0.00004   2.65345
   R25        3.62353   0.00002   0.00019   0.00025   0.00044   3.62397
   R26        2.04503   0.00001   0.00000   0.00002   0.00002   2.04505
   R27        1.82276   0.00004   0.00001   0.00005   0.00006   1.82282
    A1        2.08900  -0.00003  -0.00006  -0.00020  -0.00026   2.08873
    A2        2.09900   0.00003   0.00009   0.00023   0.00031   2.09931
    A3        2.09519   0.00000  -0.00003  -0.00003  -0.00005   2.09514
    A4        2.11341   0.00000   0.00007   0.00004   0.00010   2.11352
    A5        2.11288   0.00004   0.00010   0.00052   0.00062   2.11350
    A6        2.05689  -0.00004  -0.00016  -0.00055  -0.00072   2.05617
    A7        2.08696   0.00001   0.00002   0.00011   0.00012   2.08708
    A8        2.07604  -0.00001  -0.00005  -0.00020  -0.00026   2.07579
    A9        2.12018   0.00000   0.00003   0.00010   0.00013   2.12032
   A10        2.06456   0.00000  -0.00012  -0.00010  -0.00022   2.06434
   A11        2.08090   0.00005   0.00001   0.00022   0.00023   2.08113
   A12        2.13772  -0.00005   0.00011  -0.00012  -0.00001   2.13771
   A13        2.11056   0.00000   0.00010   0.00002   0.00012   2.11067
   A14        2.11584  -0.00002   0.00003  -0.00012  -0.00009   2.11575
   A15        2.05679   0.00002  -0.00013   0.00011  -0.00003   2.05676
   A16        2.10189   0.00002   0.00000   0.00014   0.00014   2.10203
   A17        2.09456  -0.00001  -0.00004  -0.00007  -0.00010   2.09446
   A18        2.08673  -0.00001   0.00003  -0.00007  -0.00004   2.08670
   A19        2.12071   0.00000  -0.00005  -0.00013  -0.00018   2.12053
   A20        2.14501  -0.00006   0.00008  -0.00016  -0.00008   2.14493
   A21        2.01746   0.00005  -0.00003   0.00029   0.00027   2.01772
   A22        2.03717  -0.00008  -0.00007  -0.00046  -0.00053   2.03664
   A23        2.12376   0.00005   0.00002   0.00025   0.00027   2.12404
   A24        2.12225   0.00004   0.00004   0.00022   0.00025   2.12250
   A25        2.09334   0.00003   0.00006   0.00018   0.00024   2.09358
   A26        2.10752   0.00000  -0.00001   0.00000  -0.00001   2.10751
   A27        2.08232  -0.00003  -0.00005  -0.00018  -0.00023   2.08209
   A28        2.11406   0.00000   0.00001   0.00010   0.00011   2.11417
   A29        2.08660  -0.00002  -0.00002  -0.00024  -0.00025   2.08635
   A30        2.08252   0.00002   0.00000   0.00014   0.00014   2.08266
   A31        2.08196   0.00000   0.00006   0.00002   0.00007   2.08203
   A32        2.08828   0.00001  -0.00001   0.00008   0.00007   2.08835
   A33        2.11295  -0.00001  -0.00005  -0.00009  -0.00014   2.11281
   A34        2.11792   0.00001   0.00004   0.00007   0.00011   2.11803
   A35        2.06374  -0.00005  -0.00018  -0.00062  -0.00080   2.06295
   A36        2.10153   0.00004   0.00014   0.00055   0.00069   2.10221
   A37        2.13138   0.00003  -0.00001   0.00019   0.00018   2.13157
   A38        2.08060  -0.00002   0.00002  -0.00008  -0.00006   2.08054
   A39        2.07120  -0.00002  -0.00001  -0.00011  -0.00012   2.07108
   A40        2.07027  -0.00004  -0.00004  -0.00024  -0.00027   2.07000
   A41        2.10907   0.00005   0.00012   0.00043   0.00055   2.10961
   A42        2.10385  -0.00001  -0.00008  -0.00019  -0.00027   2.10358
   A43        1.95610   0.00000   0.00039   0.00013   0.00052   1.95662
    D1       -0.00042   0.00000   0.00001   0.00011   0.00013  -0.00029
    D2        3.14091   0.00001   0.00002   0.00042   0.00044   3.14135
    D3        3.14154   0.00000   0.00002  -0.00005  -0.00003   3.14151
    D4       -0.00031   0.00000   0.00002   0.00026   0.00028  -0.00003
    D5        0.00040   0.00000  -0.00002  -0.00019  -0.00021   0.00019
    D6       -3.14089   0.00000  -0.00003  -0.00020  -0.00023  -3.14112
    D7       -3.14156   0.00000  -0.00002  -0.00003  -0.00005   3.14157
    D8        0.00033   0.00000  -0.00003  -0.00004  -0.00007   0.00026
    D9       -0.00022   0.00000  -0.00001   0.00023   0.00022   0.00000
   D10        3.14075   0.00001  -0.00003   0.00077   0.00075   3.14150
   D11       -3.14156   0.00000  -0.00002  -0.00007  -0.00008   3.14154
   D12       -0.00059   0.00001  -0.00003   0.00048   0.00045  -0.00014
   D13        0.00085  -0.00001   0.00002  -0.00049  -0.00047   0.00038
   D14       -3.14079  -0.00001   0.00000  -0.00071  -0.00071  -3.14150
   D15       -3.14010  -0.00001   0.00003  -0.00105  -0.00102  -3.14112
   D16        0.00144  -0.00002   0.00001  -0.00127  -0.00125   0.00018
   D17        3.14141   0.00002  -0.00010   0.00188   0.00179  -3.13998
   D18        0.00127  -0.00004   0.00024  -0.00410  -0.00386  -0.00260
   D19       -0.00081   0.00003  -0.00011   0.00244   0.00233   0.00151
   D20       -3.14096  -0.00004   0.00022  -0.00354  -0.00332   3.13890
   D21       -0.00088   0.00001  -0.00002   0.00042   0.00040  -0.00048
   D22        3.13956   0.00001   0.00006   0.00059   0.00065   3.14021
   D23        3.14077   0.00001   0.00000   0.00065   0.00064   3.14141
   D24       -0.00197   0.00001   0.00008   0.00082   0.00089  -0.00108
   D25       -0.00127   0.00000   0.00005  -0.00024  -0.00019  -0.00146
   D26        3.14133   0.00000   0.00006   0.00025   0.00031  -3.14154
   D27        3.14027   0.00000   0.00004  -0.00047  -0.00044   3.13983
   D28       -0.00032   0.00000   0.00004   0.00002   0.00007  -0.00025
   D29        0.00026   0.00000   0.00002  -0.00008  -0.00006   0.00020
   D30        3.14156   0.00000   0.00003  -0.00007  -0.00004   3.14152
   D31       -3.14022   0.00000  -0.00006  -0.00024  -0.00030  -3.14052
   D32        0.00107   0.00000  -0.00005  -0.00023  -0.00028   0.00079
   D33        0.00048   0.00001  -0.00002   0.00047   0.00045   0.00093
   D34       -3.14147   0.00001  -0.00003   0.00080   0.00078  -3.14070
   D35        3.14114   0.00000  -0.00003   0.00001  -0.00002   3.14112
   D36       -0.00082   0.00000  -0.00004   0.00034   0.00031  -0.00051
   D37       -0.01045   0.00004   0.00029   0.00228   0.00257  -0.00789
   D38        3.13209   0.00005   0.00030   0.00275   0.00304   3.13513
   D39        0.00001  -0.00003   0.00015  -0.00220  -0.00206  -0.00205
   D40       -3.14124  -0.00002   0.00011  -0.00191  -0.00180   3.14015
   D41        3.14016   0.00004  -0.00019   0.00377   0.00359  -3.13944
   D42       -0.00109   0.00004  -0.00022   0.00407   0.00385   0.00276
   D43        0.00015   0.00001  -0.00008   0.00082   0.00073   0.00088
   D44        3.14140   0.00001  -0.00005   0.00052   0.00047  -3.14131
   D45       -3.14108   0.00001  -0.00007   0.00049   0.00041  -3.14067
   D46        0.00016   0.00000  -0.00004   0.00019   0.00015   0.00032
   D47       -3.14146  -0.00001   0.00004  -0.00043  -0.00039   3.14134
   D48       -0.00001   0.00000   0.00002  -0.00024  -0.00022  -0.00023
   D49       -0.00022   0.00000   0.00003  -0.00010  -0.00006  -0.00029
   D50        3.14123   0.00000   0.00001   0.00009   0.00010   3.14132
   D51        3.14128  -0.00001   0.00005  -0.00046  -0.00041   3.14087
   D52       -0.00028   0.00000   0.00005  -0.00025  -0.00020  -0.00049
   D53        0.00003   0.00000   0.00001  -0.00017  -0.00016  -0.00013
   D54       -3.14153   0.00000   0.00001   0.00004   0.00005  -3.14148
   D55        0.00009   0.00000  -0.00001  -0.00002  -0.00003   0.00006
   D56        3.14155   0.00000  -0.00002   0.00011   0.00009  -3.14154
   D57       -3.14135   0.00000   0.00002  -0.00021  -0.00019  -3.14155
   D58        0.00011   0.00000   0.00000  -0.00008  -0.00007   0.00003
   D59       -0.00017   0.00000   0.00001   0.00006   0.00007  -0.00009
   D60        3.14153   0.00000  -0.00001   0.00009   0.00009  -3.14157
   D61        3.14140   0.00000   0.00002  -0.00016  -0.00014   3.14126
   D62       -0.00009   0.00000   0.00000  -0.00012  -0.00013  -0.00022
   D63        0.00010   0.00000  -0.00002   0.00004   0.00002   0.00013
   D64       -3.14159   0.00000   0.00000   0.00001   0.00001  -3.14158
   D65       -3.14136   0.00000  -0.00001  -0.00009  -0.00009  -3.14145
   D66        0.00014   0.00000   0.00001  -0.00012  -0.00011   0.00003
         Item               Value     Threshold  Converged?
 Maximum Force            0.000266     0.000450     YES
 RMS     Force            0.000044     0.000300     YES
 Maximum Displacement     0.004562     0.001800     NO 
 RMS     Displacement     0.000884     0.001200     YES
 Predicted change in Energy=-1.118277D-06
 Lowest energy point so far.  Saving SCF results.
 GradGradGradGradGradGradGradGradGradGradGradGradGradGradGradGradGradGrad

 Leave Link  103 at Thu Jan 09 22:38:22 2020, MaxMem=   134217728 cpu:         1.0
 (Enter E:\Gaussian\G09W\l202.exe)
                          Input orientation:                          
 ---------------------------------------------------------------------
 Center     Atomic      Atomic             Coordinates (Angstroms)
 Number     Number       Type             X           Y           Z
 ---------------------------------------------------------------------
      1          6           0       -3.744977    0.642809    0.001185
      2          6           0       -4.782223    1.558732    0.000307
      3          6           0       -6.118194    1.138559   -0.000233
      4          6           0       -6.417633   -0.255562    0.000126
      5          6           0       -5.338658   -1.173842    0.001501
      6          6           0       -4.031483   -0.732219    0.001898
      7          1           0       -2.715815    0.982632    0.001522
      8          1           0       -4.587635    2.624072   -0.000031
      9          1           0       -5.511686   -2.244902    0.003108
     10          1           0       -3.223079   -1.454350    0.003026
     11          6           0       -7.780241   -0.675224   -0.000537
     12          6           0       -7.184208    2.153972   -0.001044
     13          6           0       -8.849222    0.266699    0.000223
     14          6           0       -8.567786    1.658534    0.000526
     15          6           0      -10.196305   -0.167456    0.000639
     16          6           0       -9.628919    2.573160    0.001616
     17          6           0      -11.205816    0.768828    0.001671
     18          1           0      -10.417078   -1.225175    0.000159
     19          6           0      -10.944750    2.148490    0.002255
     20          1           0       -9.393416    3.630110    0.001727
     21          1           0      -11.758496    2.861904    0.003079
     22         35           0      -13.030208    0.177846    0.002318
     23          8           0       -6.928704    3.365483    0.001477
     24          8           0       -8.146586   -1.971801   -0.000199
     25          1           0       -7.385293   -2.564114   -0.006517
 ---------------------------------------------------------------------
                    Distance matrix (angstroms):
                    1          2          3          4          5
     1  C    0.000000
     2  C    1.383762   0.000000
     3  C    2.424444   1.400487   0.000000
     4  C    2.819603   2.442587   1.425916   0.000000
     5  C    2.416617   2.788653   2.440262   1.416837   0.000000
     6  C    1.404560   2.410824   2.802531   2.433294   1.379761
     7  H    1.083815   2.145213   3.405951   3.903407   3.395539
     8  H    2.153016   1.082965   2.132923   3.411919   3.871458
     9  H    3.385282   3.872952   3.437393   2.185915   1.084947
    10  H    2.161124   3.392581   3.886500   3.412078   2.134095
    11  C    4.245064   3.738806   2.460123   1.425769   2.491977
    12  C    3.756584   2.474639   1.472226   2.528536   3.805313
    13  C    5.118083   4.267297   2.866819   2.487042   3.794630
    14  C    4.928608   3.786877   2.504171   2.878701   4.295302
    15  C    6.502012   5.682605   4.282133   3.779699   4.960801
    16  C    6.192498   4.951719   3.792528   4.279489   5.696171
    17  C    7.461903   6.471977   5.101039   4.896536   6.180413
    18  H    6.928657   6.285039   4.905878   4.115301   5.078679
    19  C    7.355529   6.190683   4.931086   5.125842   6.516606
    20  H    6.389744   5.055067   4.115204   4.894255   6.286415
    21  H    8.315099   7.096946   5.897706   6.184127   7.582979
    22  Br   9.296865   8.362781   6.978460   6.626763   7.809417
    23  O    4.189161   2.805660   2.369836   3.656934   4.809753
    24  O    5.119604   4.876843   3.713315   2.436135   2.919109
    25  H    4.851423   4.875846   3.913485   2.503162   2.474193
                    6          7          8          9         10
     6  C    0.000000
     7  H    2.161411   0.000000
     8  H    3.402058   2.489586   0.000000
     9  H    2.116415   4.270114   4.955884   0.000000
    10  H    1.083970   2.489217   4.300645   2.421300   0.000000
    11  C    3.749193   5.328875   4.591088   2.758668   4.623286
    12  C    4.274317   4.619370   2.638785   4.706107   5.358222
    13  C    4.920209   6.175050   4.870147   4.176996   5.883494
    14  C    5.127743   5.890875   4.095591   4.957476   6.185139
    15  C    6.190638   7.568384   6.264967   5.124593   7.090979
    16  C    6.500525   7.093715   5.041542   6.337613   7.566745
    17  C    7.329679   8.492693   6.873300   6.442491   8.286531
    18  H    6.404595   8.011483   6.985636   5.010262   7.197648
    19  C    7.489443   8.311113   6.374881   6.987137   8.520837
    20  H    6.912326   7.183280   4.909955   7.041562   7.995298
    21  H    8.521999   9.235895   7.174806   8.068588   9.564695
    22  Br   9.044627  10.345743   8.789828   7.899233   9.942024
    23  O    5.018472   4.840085   2.455667   5.786568   6.079675
    24  O    4.297749   6.182391   5.812760   2.649018   4.950625
    25  H    3.821512   5.863744   5.894421   1.900630   4.307632
                   11         12         13         14         15
    11  C    0.000000
    12  C    2.891298   0.000000
    13  C    1.424759   2.516758   0.000000
    14  C    2.463057   1.469609   1.420003   0.000000
    15  C    2.468845   3.802862   1.415318   2.446694   0.000000
    16  C    3.737594   2.480391   2.434685   1.400909   2.798732
    17  C    3.717506   4.253465   2.409496   2.784022   1.376858
    18  H    2.693576   4.676546   2.164223   3.425735   1.080514
    19  C    4.241165   3.760548   2.816448   2.426936   2.433881
    20  H    4.597634   2.656989   3.407151   2.137470   3.881512
    21  H    5.323326   4.628747   3.898586   3.410094   3.408440
    22  Br   5.318824   6.170965   4.181931   4.701665   2.854863
    23  O    4.129459   1.238163   3.645662   2.366488   4.812367
    24  O    1.347339   4.236529   2.346184   3.654687   2.730753
    25  H    1.929747   4.722372   3.186947   4.385098   3.694023
                   16         17         18         19         20
    16  C    0.000000
    17  C    2.396293   0.000000
    18  H    3.879246   2.144331   0.000000
    19  C    1.382663   1.404145   3.414683   0.000000
    20  H    1.082868   3.386994   4.962023   2.145189   0.000000
    21  H    2.149064   2.164815   4.301584   1.082194   2.486714
    22  Br   4.160084   1.917724   2.965961   2.869246   5.014417
    23  O    2.814060   5.003629   5.765665   4.196391   2.478877
    24  O    4.780584   4.107303   2.390101   4.980615   5.738989
    25  H    5.605846   5.070006   3.314290   5.905797   6.511607
                   21         22         23         24         25
    21  H    0.000000
    22  Br   2.970087   0.000000
    23  O    4.855974   6.883994   0.000000
    24  O    6.034120   5.335799   5.474472   0.000000
    25  H    6.968979   6.275626   5.947155   0.964594   0.000000
 Stoichiometry    C14H8BrO2(2)
 Framework group  C1[X(C14H8BrO2)]
 Deg. of freedom    69
 Full point group                 C1      NOp   1
 RotChk:  IX=0 Diff= 3.08D-04
 Largest Abelian subgroup         C1      NOp   1
 Largest concise Abelian subgroup C1      NOp   1
                         Standard orientation:                         
 ---------------------------------------------------------------------
 Center     Atomic      Atomic             Coordinates (Angstroms)
 Number     Number       Type             X           Y           Z
 ---------------------------------------------------------------------
      1          6           0       -5.068922    0.090247   -0.000991
      2          6           0       -4.031169    1.005597    0.000185
      3          6           0       -2.695431    0.584685    0.000918
      4          6           0       -2.396763   -0.809602    0.000447
      5          6           0       -3.476245   -1.727284   -0.001233
      6          6           0       -4.783177   -1.284939   -0.001815
      7          1           0       -6.097896    0.430639   -0.001475
      8          1           0       -4.225169    2.071044    0.000614
      9          1           0       -3.303810   -2.798440   -0.002936
     10          1           0       -5.591979   -2.006622   -0.003176
     11          6           0       -1.034388   -1.230016    0.001309
     12          6           0       -1.628857    1.599508    0.002043
     13          6           0        0.035114   -0.288685    0.000856
     14          6           0       -0.245553    1.103305    0.000667
     15          6           0        1.381957   -0.723584    0.000634
     16          6           0        0.816086    2.017345   -0.000122
     17          6           0        2.391985    0.212140   -0.000104
     18          1           0        1.602144   -1.781426    0.001028
     19          6           0        2.131683    1.591947   -0.000571
     20          1           0        0.581168    3.074424   -0.000150
     21          1           0        2.945824    2.304911   -0.001162
     22         35           0        4.216051   -0.379850   -0.000489
     23          8           0       -1.883690    2.811161   -0.000380
     24          8           0       -0.668760   -2.526796    0.000884
     25          1           0       -1.430381   -3.118688    0.006993
 ---------------------------------------------------------------------
 Rotational constants (GHZ):      0.9829901      0.1774753      0.1503332
 Leave Link  202 at Thu Jan 09 22:38:22 2020, MaxMem=   134217728 cpu:         0.0
 (Enter E:\Gaussian\G09W\l301.exe)
 Standard basis: 6-311G(d) (5D, 7F)
 Ernie: Thresh=  0.10000D-02 Tol=  0.10000D-05 Strict=F.
 There are   375 symmetry adapted cartesian basis functions of A   symmetry.
 There are   356 symmetry adapted basis functions of A   symmetry.
   356 basis functions,   642 primitive gaussians,   375 cartesian basis functions
    72 alpha electrons       71 beta electrons
       nuclear repulsion energy      1393.0370251485 Hartrees.
 IExCor=  402 DFT=T Ex+Corr=B3LYP ExCW=0 ScaHFX=  0.200000
 ScaDFX=  0.800000  0.720000  1.000000  0.810000 ScalE2=  1.000000  1.000000
 IRadAn=      0 IRanWt=     -1 IRanGd=            0 ICorTp=0 IEmpDi=141
 NAtoms=   25 NActive=   25 NUniq=   25 SFac= 1.00D+00 NAtFMM=   60 NAOKFM=F Big=F
 Integral buffers will be    262144 words long.
 Raffenetti 2 integral format.
 Two-electron integral symmetry is turned on.
 R6Disp:  Grimme-D3(BJ) Dispersion energy=       -0.0633796503 Hartrees.
 Nuclear repulsion after empirical dispersion term =     1392.9736454982 Hartrees.
 ------------------------------------------------------------------------------
 Polarizable Continuum Model (PCM)
 =================================
 Model                : PCM (using non-symmetric T matrix).
 Atomic radii         : UFF (Universal Force Field).
 Polarization charges : Total charges.
 Charge compensation  : None.
 Solution method      : On-the-fly selection.
 Cavity type          : Scaled VdW (van der Waals Surface) (Alpha=1.100).
 Cavity algorithm     : GePol (No added spheres)
                        Default sphere list used, NSphG=   25.
                        Lebedev-Laikov grids with approx.  5.0 points / Ang**2.
                        Smoothing algorithm: Karplus/York (Gamma=1.0000).
                        Polarization charges: spherical gaussians, with
                                              point-specific exponents (IZeta= 3).
                        Self-potential: point-specific (ISelfS= 7).
                        Self-field    : sphere-specific E.n sum rule (ISelfD= 2).
 1st derivatives      : Analytical E(r).r(x)/FMM algorithm (CHGder, D1EAlg=3).
                        Cavity 1st derivative terms included.
 Solvent              : Acetonitrile, Eps=  35.688000 Eps(inf)=   1.806874
 ------------------------------------------------------------------------------
 GePol: Number of generator spheres                  =      25
 GePol: Total number of spheres                      =      25
 GePol: Number of exposed spheres                    =      25 (100.00%)
 GePol: Number of points                             =    2188
 GePol: Average weight of points                     =       0.13
 GePol: Minimum weight of points                     =   0.64D-10
 GePol: Maximum weight of points                     =    0.20577
 GePol: Number of points with low weight             =     132
 GePol: Fraction of low-weight points (<1% of avg)   =       6.03%
 GePol: Cavity surface area                          =    281.138 Ang**2
 GePol: Cavity volume                                =    308.184 Ang**3
 Leave Link  301 at Thu Jan 09 22:38:22 2020, MaxMem=   134217728 cpu:         0.0
 (Enter E:\Gaussian\G09W\l302.exe)
 NPDir=0 NMtPBC=     1 NCelOv=     1 NCel=       1 NClECP=     1 NCelD=      1
         NCelK=      1 NCelE2=     1 NClLst=     1 CellRange=     0.0.
 One-electron integrals computed using PRISM.
 NBasis=   356 RedAO= T EigKep=  8.58D-05  NBF=   356
 NBsUse=   356 1.00D-06 EigRej= -1.00D+00 NBFU=   356
 Precomputing XC quadrature grid using
 IXCGrd= 4 IRadAn=           0 IRanWt=          -1 IRanGd=           0 AccXCQ= 0.00D+00.
 Generated NRdTot=       0 NPtTot=           0 NUsed=           0 NTot=          16
 NSgBfM=   363   363   364   364   364 MxSgAt=    25 MxSgA2=    25.
 Leave Link  302 at Thu Jan 09 22:38:24 2020, MaxMem=   134217728 cpu:         2.0
 (Enter E:\Gaussian\G09W\l303.exe)
 DipDrv:  MaxL=1.
 Leave Link  303 at Thu Jan 09 22:38:24 2020, MaxMem=   134217728 cpu:         0.0
 (Enter E:\Gaussian\G09W\l401.exe)
 Initial guess from the checkpoint file:  "E:\Gaussian file\2-BrHAQ opt.chk"
 B after Tr=     0.000000    0.000000    0.000000
         Rot=    1.000000   -0.000053   -0.000001    0.000008 Ang=  -0.01 deg.
 Guess basis will be translated and rotated to current coordinates.
 JPrj=2 DoOrth=T DoCkMO=T.
 Initial guess <Sx>= 0.0000 <Sy>= 0.0000 <Sz>= 0.5000 <S**2>= 0.7730 S= 0.5114
 Leave Link  401 at Thu Jan 09 22:38:26 2020, MaxMem=   134217728 cpu:         2.0
 (Enter E:\Gaussian\G09W\l502.exe)
 UHF open shell SCF:
 Using DIIS extrapolation, IDIIS=  1040.
 Integral symmetry usage will be decided dynamically.
 IVT=      444890 IEndB=      444890 NGot=   134217728 MDV=   133930479
 LenX=   133930479 LenY=   133789413
 Requested convergence on RMS density matrix=1.00D-08 within 128 cycles.
 Requested convergence on MAX density matrix=1.00D-06.
 Requested convergence on             energy=1.00D-06.
 No special actions if energy rises.
 Fock matrices will be formed incrementally for  20 cycles.

 Cycle   1  Pass 1  IDiag  1:
 FoFJK:  IHMeth= 1 ICntrl=       0 DoSepK=F KAlg= 0 I1Cent=   0 FoldK=F
 IRaf= 780000000 NMat=   1 IRICut=       1 DoRegI=T DoRafI=F ISym2E= 0.
 FoFCou: FMM=F IPFlag=           0 FMFlag=      100000 FMFlg1=           0
         NFxFlg=           0 DoJE=F BraDBF=F KetDBF=F FulRan=T
         wScrn=  0.000000 ICntrl=       0 IOpCl=  1 I1Cent=           0 NGrid=           0
         NMat0=    1 NMatS0=      1 NMatT0=    0 NMatD0=    1 NMtDS0=    0 NMtDT0=    0
 Symmetry not used in FoFCou.
 Inv3:  Mode=1 IEnd=    14362032.
 Iteration    1 A*A^-1 deviation from unit magnitude is 2.44D-15 for    945.
 Iteration    1 A*A^-1 deviation from orthogonality  is 2.01D-15 for   1124     30.
 Iteration    1 A^-1*A deviation from unit magnitude is 2.22D-15 for    731.
 Iteration    1 A^-1*A deviation from orthogonality  is 9.73D-14 for   1602   1568.
 E= -3263.12403381969    
 DIIS: error= 1.40D-04 at cycle   1 NSaved=   1.
 NSaved= 1 IEnMin= 1 EnMin= -3263.12403381969     IErMin= 1 ErrMin= 1.40D-04
 ErrMax= 1.40D-04  0.00D+00 EMaxC= 1.00D-01 BMatC= 2.24D-05 BMatP= 2.24D-05
 IDIUse=3 WtCom= 9.99D-01 WtEn= 1.40D-03
 Coeff-Com:  0.100D+01
 Coeff-En:   0.100D+01
 Coeff:      0.100D+01
 Gap=     0.729 Goal=   None    Shift=    0.000
 Gap=     0.797 Goal=   None    Shift=    0.000
 RMSDP=2.76D-05 MaxDP=1.16D-03              OVMax= 1.08D-03

 Cycle   2  Pass 1  IDiag  1:
 RMSU=  2.75D-05    CP:  1.00D+00
 E= -3263.12404272174     Delta-E=       -0.000008902053 Rises=F Damp=F
 DIIS: error= 3.97D-05 at cycle   2 NSaved=   2.
 NSaved= 2 IEnMin= 2 EnMin= -3263.12404272174     IErMin= 2 ErrMin= 3.97D-05
 ErrMax= 3.97D-05  0.00D+00 EMaxC= 1.00D-01 BMatC= 1.64D-06 BMatP= 2.24D-05
 IDIUse=1 WtCom= 1.00D+00 WtEn= 0.00D+00
 Coeff-Com:  0.334D-01 0.967D+00
 Coeff:      0.334D-01 0.967D+00
 Gap=     0.112 Goal=   None    Shift=    0.000
 Gap=     0.133 Goal=   None    Shift=    0.000
 RMSDP=7.75D-06 MaxDP=3.52D-04 DE=-8.90D-06 OVMax= 3.85D-04

 Cycle   3  Pass 1  IDiag  1:
 RMSU=  7.45D-06    CP:  1.00D+00  9.51D-01
 E= -3263.12404206114     Delta-E=        0.000000660600 Rises=F Damp=F
 DIIS: error= 8.62D-05 at cycle   3 NSaved=   3.
 NSaved= 3 IEnMin= 2 EnMin= -3263.12404272174     IErMin= 2 ErrMin= 3.97D-05
 ErrMax= 8.62D-05  0.00D+00 EMaxC= 1.00D-01 BMatC= 5.60D-06 BMatP= 1.64D-06
 IDIUse=1 WtCom= 1.00D+00 WtEn= 0.00D+00
 Coeff-Com: -0.471D-01 0.686D+00 0.362D+00
 Coeff:     -0.471D-01 0.686D+00 0.362D+00
 Gap=     0.112 Goal=   None    Shift=    0.000
 Gap=     0.133 Goal=   None    Shift=    0.000
 RMSDP=6.42D-06 MaxDP=2.93D-04 DE= 6.61D-07 OVMax= 2.75D-04

 Cycle   4  Pass 1  IDiag  1:
 RMSU=  1.29D-06    CP:  1.00D+00  1.03D+00  2.26D-01
 E= -3263.12404308735     Delta-E=       -0.000001026209 Rises=F Damp=F
 DIIS: error= 6.83D-06 at cycle   4 NSaved=   4.
 NSaved= 4 IEnMin= 4 EnMin= -3263.12404308735     IErMin= 4 ErrMin= 6.83D-06
 ErrMax= 6.83D-06  0.00D+00 EMaxC= 1.00D-01 BMatC= 3.89D-08 BMatP= 1.64D-06
 IDIUse=1 WtCom= 1.00D+00 WtEn= 0.00D+00
 Coeff-Com: -0.126D-01 0.143D+00 0.121D+00 0.748D+00
 Coeff:     -0.126D-01 0.143D+00 0.121D+00 0.748D+00
 Gap=     0.112 Goal=   None    Shift=    0.000
 Gap=     0.133 Goal=   None    Shift=    0.000
 RMSDP=6.09D-07 MaxDP=2.41D-05 DE=-1.03D-06 OVMax= 5.96D-05

 Cycle   5  Pass 1  IDiag  1:
 RMSU=  2.99D-07    CP:  1.00D+00  1.02D+00  2.91D-01  8.84D-01
 E= -3263.12404309484     Delta-E=       -0.000000007485 Rises=F Damp=F
 DIIS: error= 2.21D-06 at cycle   5 NSaved=   5.
 NSaved= 5 IEnMin= 5 EnMin= -3263.12404309484     IErMin= 5 ErrMin= 2.21D-06
 ErrMax= 2.21D-06  0.00D+00 EMaxC= 1.00D-01 BMatC= 5.48D-09 BMatP= 3.89D-08
 IDIUse=1 WtCom= 1.00D+00 WtEn= 0.00D+00
 Coeff-Com: -0.374D-02 0.330D-01 0.415D-01 0.364D+00 0.565D+00
 Coeff:     -0.374D-02 0.330D-01 0.415D-01 0.364D+00 0.565D+00
 Gap=     0.112 Goal=   None    Shift=    0.000
 Gap=     0.133 Goal=   None    Shift=    0.000
 RMSDP=1.54D-07 MaxDP=5.26D-06 DE=-7.49D-09 OVMax= 2.04D-05

 Cycle   6  Pass 1  IDiag  1:
 RMSU=  1.37D-07    CP:  1.00D+00  1.02D+00  2.92D-01  9.20D-01  8.24D-01
 E= -3263.12404309630     Delta-E=       -0.000000001462 Rises=F Damp=F
 DIIS: error= 1.37D-06 at cycle   6 NSaved=   6.
 NSaved= 6 IEnMin= 6 EnMin= -3263.12404309630     IErMin= 6 ErrMin= 1.37D-06
 ErrMax= 1.37D-06  0.00D+00 EMaxC= 1.00D-01 BMatC= 1.38D-09 BMatP= 5.48D-09
 IDIUse=1 WtCom= 1.00D+00 WtEn= 0.00D+00
 Coeff-Com:  0.184D-02-0.296D-01-0.140D-01-0.123D-01 0.335D+00 0.719D+00
 Coeff:      0.184D-02-0.296D-01-0.140D-01-0.123D-01 0.335D+00 0.719D+00
 Gap=     0.112 Goal=   None    Shift=    0.000
 Gap=     0.133 Goal=   None    Shift=    0.000
 RMSDP=8.78D-08 MaxDP=4.14D-06 DE=-1.46D-09 OVMax= 2.17D-05

 Cycle   7  Pass 1  IDiag  1:
 RMSU=  5.59D-08    CP:  1.00D+00  1.02D+00  2.92D-01  9.49D-01  1.00D+00
                    CP:  8.69D-01
 E= -3263.12404309679     Delta-E=       -0.000000000490 Rises=F Damp=F
 DIIS: error= 5.39D-07 at cycle   7 NSaved=   7.
 NSaved= 7 IEnMin= 7 EnMin= -3263.12404309679     IErMin= 7 ErrMin= 5.39D-07
 ErrMax= 5.39D-07  0.00D+00 EMaxC= 1.00D-01 BMatC= 1.92D-10 BMatP= 1.38D-09
 IDIUse=1 WtCom= 1.00D+00 WtEn= 0.00D+00
 Coeff-Com:  0.128D-02-0.175D-01-0.111D-01-0.448D-01 0.917D-01 0.344D+00
 Coeff-Com:  0.636D+00
 Coeff:      0.128D-02-0.175D-01-0.111D-01-0.448D-01 0.917D-01 0.344D+00
 Coeff:      0.636D+00
 Gap=     0.112 Goal=   None    Shift=    0.000
 Gap=     0.133 Goal=   None    Shift=    0.000
 RMSDP=3.30D-08 MaxDP=1.55D-06 DE=-4.90D-10 OVMax= 7.70D-06

 Cycle   8  Pass 1  IDiag  1:
 RMSU=  2.57D-08    CP:  1.00D+00  1.02D+00  2.93D-01  9.53D-01  1.03D+00
                    CP:  9.77D-01  1.09D+00
 E= -3263.12404309691     Delta-E=       -0.000000000125 Rises=F Damp=F
 DIIS: error= 3.31D-07 at cycle   8 NSaved=   8.
 NSaved= 8 IEnMin= 8 EnMin= -3263.12404309691     IErMin= 8 ErrMin= 3.31D-07
 ErrMax= 3.31D-07  0.00D+00 EMaxC= 1.00D-01 BMatC= 5.62D-11 BMatP= 1.92D-10
 IDIUse=1 WtCom= 1.00D+00 WtEn= 0.00D+00
 Coeff-Com: -0.136D-03 0.410D-02 0.683D-03-0.191D-01-0.101D+00-0.121D+00
 Coeff-Com:  0.343D+00 0.892D+00
 Coeff:     -0.136D-03 0.410D-02 0.683D-03-0.191D-01-0.101D+00-0.121D+00
 Coeff:      0.343D+00 0.892D+00
 Gap=     0.112 Goal=   None    Shift=    0.000
 Gap=     0.133 Goal=   None    Shift=    0.000
 RMSDP=2.93D-08 MaxDP=1.72D-06 DE=-1.25D-10 OVMax= 6.63D-06

 Cycle   9  Pass 1  IDiag  1:
 RMSU=  1.30D-08    CP:  1.00D+00  1.02D+00  2.92D-01  9.58D-01  1.06D+00
                    CP:  1.07D+00  1.44D+00  9.59D-01
 E= -3263.12404309698     Delta-E=       -0.000000000069 Rises=F Damp=F
 DIIS: error= 1.37D-07 at cycle   9 NSaved=   9.
 NSaved= 9 IEnMin= 9 EnMin= -3263.12404309698     IErMin= 9 ErrMin= 1.37D-07
 ErrMax= 1.37D-07  0.00D+00 EMaxC= 1.00D-01 BMatC= 1.36D-11 BMatP= 5.62D-11
 IDIUse=1 WtCom= 1.00D+00 WtEn= 0.00D+00
 Coeff-Com: -0.254D-03 0.463D-02 0.235D-02-0.217D-02-0.614D-01-0.104D+00
 Coeff-Com:  0.626D-01 0.444D+00 0.654D+00
 Coeff:     -0.254D-03 0.463D-02 0.235D-02-0.217D-02-0.614D-01-0.104D+00
 Coeff:      0.626D-01 0.444D+00 0.654D+00
 Gap=     0.112 Goal=   None    Shift=    0.000
 Gap=     0.133 Goal=   None    Shift=    0.000
 RMSDP=1.20D-08 MaxDP=5.76D-07 DE=-6.91D-11 OVMax= 3.32D-06

 Cycle  10  Pass 1  IDiag  1:
 RMSU=  6.31D-09    CP:  1.00D+00  1.02D+00  2.93D-01  9.58D-01  1.08D+00
                    CP:  1.08D+00  1.52D+00  1.19D+00  9.05D-01
 E= -3263.12404309693     Delta-E=        0.000000000050 Rises=F Damp=F
 DIIS: error= 5.94D-08 at cycle  10 NSaved=  10.
 NSaved=10 IEnMin= 9 EnMin= -3263.12404309698     IErMin=10 ErrMin= 5.94D-08
 ErrMax= 5.94D-08  0.00D+00 EMaxC= 1.00D-01 BMatC= 3.52D-12 BMatP= 1.36D-11
 IDIUse=1 WtCom= 1.00D+00 WtEn= 0.00D+00
 Coeff-Com: -0.948D-04 0.116D-02 0.115D-02 0.403D-02-0.356D-02-0.179D-01
 Coeff-Com: -0.786D-01-0.377D-01 0.336D+00 0.795D+00
 Coeff:     -0.948D-04 0.116D-02 0.115D-02 0.403D-02-0.356D-02-0.179D-01
 Coeff:     -0.786D-01-0.377D-01 0.336D+00 0.795D+00
 Gap=     0.112 Goal=   None    Shift=    0.000
 Gap=     0.133 Goal=   None    Shift=    0.000
 RMSDP=6.22D-09 MaxDP=3.39D-07 DE= 5.00D-11 OVMax= 1.11D-06

 Error on total polarization charges =  0.01435
 SCF Done:  E(UB3LYP) =  -3263.12404310     A.U. after   10 cycles
            NFock= 10  Conv=0.62D-08     -V/T= 2.0017
 <Sx>= 0.0000 <Sy>= 0.0000 <Sz>= 0.5000 <S**2>= 0.7729 S= 0.5114
 <L.S>= 0.000000000000E+00
 KE= 3.257436751658D+03 PE=-1.054427370047D+04 EE= 2.630739260215D+03
 Annihilation of the first spin contaminant:
 S**2 before annihilation     0.7729,   after     0.7504
 Leave Link  502 at Thu Jan 09 22:51:32 2020, MaxMem=   134217728 cpu:       786.0
 (Enter E:\Gaussian\G09W\l701.exe)
 Compute integral first derivatives.
 ... and contract with generalized density number  0.
 R6Disp: Adding Grimme-D3(BJ) dispersion energy 1st derivatives to the gradient.
 D1PCM: PCM CHGder 1st derivatives, ID1Alg=3 FixD1E=F DoIter=F DoCFld=F I1PDM=0.
 GePol: Maximum number of non-zero 1st derivatives   =     349
 Leave Link  701 at Thu Jan 09 22:51:54 2020, MaxMem=   134217728 cpu:        22.0
 (Enter E:\Gaussian\G09W\l702.exe)
 L702 exits ... SP integral derivatives will be done elsewhere.
 Leave Link  702 at Thu Jan 09 22:51:54 2020, MaxMem=   134217728 cpu:         0.0
 (Enter E:\Gaussian\G09W\l703.exe)
 Compute integral first derivatives, UseDBF=F ICtDFT=           0.
 Integral derivatives from FoFJK, PRISM(SPDF).
 Calling FoFJK, ICntrl=      2127 FMM=F ISym2X=0 I1Cent= 0 IOpClX= 1 NMat=1 NMatS=1 NMatT=0.
 FoFJK:  IHMeth= 1 ICntrl=    2127 DoSepK=F KAlg= 0 I1Cent=   0 FoldK=F
 IRaf=         0 NMat=   1 IRICut=       1 DoRegI=T DoRafI=F ISym2E= 0.
 FoFCou: FMM=F IPFlag=           0 FMFlag=      100000 FMFlg1=         800
         NFxFlg=           0 DoJE=F BraDBF=F KetDBF=F FulRan=T
         wScrn=  0.000000 ICntrl=    2127 IOpCl=  1 I1Cent=           0 NGrid=           0
         NMat0=    1 NMatS0=      1 NMatT0=    0 NMatD0=    1 NMtDS0=    0 NMtDT0=    0
 Symmetry not used in FoFCou.
 Leave Link  703 at Thu Jan 09 22:55:30 2020, MaxMem=   134217728 cpu:       215.0
 (Enter E:\Gaussian\G09W\l716.exe)
 Dipole        =-1.29531088D+00-2.20590220D+00 5.29472988D-03
 ***** Axes restored to original set *****
 -------------------------------------------------------------------
 Center     Atomic                   Forces (Hartrees/Bohr)
 Number     Number              X              Y              Z
 -------------------------------------------------------------------
      1        6          -0.000023976    0.000030753    0.000004419
      2        6          -0.000055192   -0.000001940   -0.000011752
      3        6           0.000017852   -0.000017840   -0.000163674
      4        6           0.000007685    0.000008809   -0.000029314
      5        6          -0.000034428   -0.000028350    0.000011674
      6        6          -0.000021151   -0.000022322    0.000003616
      7        1          -0.000007542   -0.000006444    0.000000764
      8        1           0.000038215   -0.000000784    0.000002408
      9        1          -0.000023805   -0.000005943   -0.000008941
     10        1          -0.000015492   -0.000018007   -0.000001615
     11        6           0.000050627   -0.000004633    0.000054051
     12        6          -0.000006177   -0.000071992    0.000541472
     13        6           0.000011084   -0.000016631   -0.000013184
     14        6          -0.000009389   -0.000014434   -0.000168793
     15        6          -0.000035435    0.000017478    0.000010818
     16        6           0.000052514   -0.000013477   -0.000010839
     17        6           0.000023297   -0.000026737    0.000003027
     18        1          -0.000005712    0.000000373    0.000001719
     19        6           0.000015142    0.000011678    0.000007717
     20        1          -0.000022790    0.000021902    0.000003626
     21        1           0.000020823    0.000027630    0.000000084
     22       35           0.000048987    0.000025835   -0.000001214
     23        8           0.000014039    0.000029973   -0.000210270
     24        8          -0.000058639    0.000030492   -0.000061014
     25        1           0.000019463    0.000044611    0.000035216
 -------------------------------------------------------------------
 Cartesian Forces:  Max     0.000541472 RMS     0.000076688
 Leave Link  716 at Thu Jan 09 22:55:30 2020, MaxMem=   134217728 cpu:         0.0
 (Enter E:\Gaussian\G09W\l103.exe)

 GradGradGradGradGradGradGradGradGradGradGradGradGradGradGradGradGradGrad
 Berny optimization.
 Using GEDIIS/GDIIS optimizer.
 FormGI is forming the generalized inverse of G from B-inverse, IUseBI=4.
 Internal  Forces:  Max     0.000111419 RMS     0.000031871
 Search for a local minimum.
 Step number   4 out of a maximum of  146
 All quantities printed in internal units (Hartrees-Bohrs-Radians)
 RMS Force = .31871D-04 SwitMx=.10000D-02 MixMth= 2
 Mixed Optimization -- En-DIIS/RFO-DIIS
 Swapping is turned off.
 Update second derivatives using D2CorX and points    1    2    3    4
 DE=  1.79D-07 DEPred=-1.12D-06 R=-1.60D-01
 Trust test=-1.60D-01 RLast= 1.01D-02 DXMaxT set to 1.50D-01
 ITU= -1  1  1  0
     Eigenvalues ---    0.01256   0.01544   0.01627   0.01693   0.01738
     Eigenvalues ---    0.01772   0.01821   0.01864   0.01884   0.02061
     Eigenvalues ---    0.02071   0.02088   0.02102   0.02133   0.02153
     Eigenvalues ---    0.02170   0.02184   0.02188   0.02201   0.02234
     Eigenvalues ---    0.02260   0.03229   0.13221   0.16000   0.16000
     Eigenvalues ---    0.16000   0.16000   0.16004   0.16022   0.16840
     Eigenvalues ---    0.17606   0.21372   0.22209   0.22710   0.23289
     Eigenvalues ---    0.23748   0.24626   0.24725   0.25000   0.25000
     Eigenvalues ---    0.25001   0.25035   0.26132   0.31397   0.34638
     Eigenvalues ---    0.35387   0.35478   0.35497   0.35597   0.35635
     Eigenvalues ---    0.35688   0.35892   0.37392   0.39589   0.40770
     Eigenvalues ---    0.41012   0.41178   0.41901   0.43411   0.44024
     Eigenvalues ---    0.44469   0.44880   0.47190   0.47321   0.48407
     Eigenvalues ---    0.49262   0.54366   0.56290   0.77991
 En-DIIS/RFO-DIIS IScMMF=        0 using points:     4    3    2    1
 RFO step:  Lambda=-4.84767742D-07.
 NNeg= 0 NP= 4 Switch=  2.50D-03 Rises=F DC=  6.86D-05 SmlDif=  1.00D-05
 RMS Error=  0.1284433389D-03 NUsed= 4 EDIIS=F
 DidBck=T Rises=F RFO-DIIS coefs:    0.43635    0.78465   -0.19372   -0.02728
 Iteration  1 RMS(Cart)=  0.00068358 RMS(Int)=  0.00000052
 Iteration  2 RMS(Cart)=  0.00000074 RMS(Int)=  0.00000007
 ITry= 1 IFail=0 DXMaxC= 3.89D-03 DCOld= 1.00D+10 DXMaxT= 1.50D-01 DXLimC= 3.00D+00 Rises=F
 Variable       Old X    -DE/DX   Delta X   Delta X   Delta X     New X
                                 (Linear)    (Quad)   (Total)
    R1        2.61493  -0.00003  -0.00008   0.00006  -0.00002   2.61491
    R2        2.65423   0.00004  -0.00013   0.00020   0.00007   2.65430
    R3        2.04811  -0.00001  -0.00003   0.00003  -0.00001   2.04811
    R4        2.64654  -0.00005  -0.00018   0.00015  -0.00003   2.64650
    R5        2.04651   0.00001  -0.00006   0.00009   0.00003   2.04653
    R6        2.69459  -0.00003  -0.00002  -0.00004  -0.00006   2.69453
    R7        2.78210  -0.00005  -0.00041   0.00046   0.00005   2.78216
    R8        2.67743  -0.00006  -0.00003  -0.00005  -0.00008   2.67735
    R9        2.69431  -0.00007   0.00002  -0.00014  -0.00012   2.69419
   R10        2.60737  -0.00002  -0.00010   0.00010   0.00000   2.60737
   R11        2.05025   0.00000  -0.00008   0.00010   0.00002   2.05027
   R12        2.04841   0.00000  -0.00003   0.00003   0.00000   2.04840
   R13        2.69240  -0.00007  -0.00010   0.00004  -0.00006   2.69234
   R14        2.54610  -0.00006   0.00004  -0.00014  -0.00010   2.54600
   R15        2.77716  -0.00004  -0.00039   0.00044   0.00006   2.77721
   R16        2.33979   0.00003   0.00007  -0.00014  -0.00007   2.33972
   R17        2.68342  -0.00002  -0.00003   0.00000  -0.00004   2.68338
   R18        2.67456  -0.00002  -0.00013   0.00012  -0.00001   2.67455
   R19        2.64733  -0.00004  -0.00017   0.00015  -0.00002   2.64731
   R20        2.60188  -0.00005  -0.00004  -0.00001  -0.00005   2.60183
   R21        2.04188   0.00001  -0.00005   0.00006   0.00001   2.04189
   R22        2.61285  -0.00004  -0.00006   0.00002  -0.00004   2.61282
   R23        2.04632   0.00001  -0.00006   0.00009   0.00002   2.04635
   R24        2.65345   0.00001  -0.00005   0.00007   0.00001   2.65346
   R25        3.62397  -0.00005  -0.00007  -0.00006  -0.00013   3.62384
   R26        2.04505   0.00000  -0.00004   0.00004   0.00000   2.04505
   R27        1.82282  -0.00001  -0.00007   0.00007   0.00000   1.82282
    A1        2.08873   0.00001   0.00005  -0.00004   0.00001   2.08875
    A2        2.09931  -0.00002  -0.00005   0.00003  -0.00003   2.09928
    A3        2.09514   0.00000   0.00000   0.00001   0.00001   2.09515
    A4        2.11352  -0.00003   0.00000  -0.00007  -0.00007   2.11345
    A5        2.11350  -0.00002  -0.00005   0.00007   0.00002   2.11352
    A6        2.05617   0.00005   0.00005   0.00000   0.00005   2.05622
    A7        2.08708   0.00002   0.00001   0.00003   0.00004   2.08712
    A8        2.07579  -0.00001  -0.00005   0.00001  -0.00003   2.07575
    A9        2.12032  -0.00001   0.00004  -0.00004   0.00000   2.12031
   A10        2.06434   0.00004  -0.00005   0.00013   0.00008   2.06442
   A11        2.08113   0.00000  -0.00009   0.00013   0.00004   2.08118
   A12        2.13771  -0.00004   0.00014  -0.00026  -0.00013   2.13759
   A13        2.11067  -0.00004   0.00004  -0.00013  -0.00010   2.11058
   A14        2.11575   0.00000   0.00007  -0.00011  -0.00004   2.11570
   A15        2.05676   0.00003  -0.00011   0.00025   0.00014   2.05690
   A16        2.10203   0.00000  -0.00005   0.00008   0.00003   2.10206
   A17        2.09446   0.00001   0.00000   0.00002   0.00002   2.09449
   A18        2.08670  -0.00001   0.00005  -0.00011  -0.00006   2.08664
   A19        2.12053   0.00002  -0.00003   0.00005   0.00001   2.12054
   A20        2.14493   0.00000   0.00016  -0.00023  -0.00006   2.14487
   A21        2.01772  -0.00001  -0.00013   0.00018   0.00005   2.01777
   A22        2.03664   0.00000   0.00011  -0.00018  -0.00007   2.03657
   A23        2.12404   0.00000  -0.00007   0.00011   0.00005   2.12408
   A24        2.12250   0.00000  -0.00004   0.00007   0.00003   2.12253
   A25        2.09358  -0.00001  -0.00003   0.00003   0.00000   2.09357
   A26        2.10751   0.00000  -0.00002   0.00002   0.00000   2.10751
   A27        2.08209   0.00001   0.00005  -0.00005   0.00000   2.08210
   A28        2.11417   0.00000   0.00001   0.00002   0.00002   2.11419
   A29        2.08635  -0.00001   0.00000  -0.00007  -0.00007   2.08628
   A30        2.08266   0.00001  -0.00001   0.00006   0.00005   2.08271
   A31        2.08203  -0.00003  -0.00002  -0.00005  -0.00006   2.08197
   A32        2.08835   0.00001  -0.00004   0.00008   0.00004   2.08839
   A33        2.11281   0.00001   0.00006  -0.00004   0.00003   2.11283
   A34        2.11803  -0.00002  -0.00004   0.00000  -0.00004   2.11799
   A35        2.06295   0.00004   0.00008  -0.00004   0.00004   2.06299
   A36        2.10221  -0.00003  -0.00004   0.00003   0.00000   2.10221
   A37        2.13157   0.00002  -0.00006   0.00014   0.00008   2.13164
   A38        2.08054  -0.00002   0.00004  -0.00010  -0.00006   2.08049
   A39        2.07108   0.00000   0.00002  -0.00004  -0.00002   2.07106
   A40        2.07000   0.00000   0.00007  -0.00010  -0.00003   2.06997
   A41        2.10961  -0.00002  -0.00009   0.00008  -0.00001   2.10960
   A42        2.10358   0.00002   0.00002   0.00002   0.00004   2.10362
   A43        1.95662  -0.00010  -0.00003  -0.00032  -0.00035   1.95627
    D1       -0.00029   0.00000  -0.00004   0.00009   0.00005  -0.00024
    D2        3.14135  -0.00001  -0.00021   0.00010  -0.00011   3.14124
    D3        3.14151   0.00000   0.00007   0.00001   0.00008   3.14159
    D4       -0.00003  -0.00001  -0.00010   0.00002  -0.00009  -0.00011
    D5        0.00019   0.00000   0.00009  -0.00007   0.00002   0.00021
    D6       -3.14112   0.00000   0.00007  -0.00014  -0.00007  -3.14119
    D7        3.14157   0.00000  -0.00001   0.00001   0.00000   3.14157
    D8        0.00026   0.00000  -0.00003  -0.00005  -0.00009   0.00017
    D9        0.00000  -0.00001  -0.00015   0.00005  -0.00010  -0.00010
   D10        3.14150  -0.00002  -0.00047   0.00010  -0.00037   3.14113
   D11        3.14154   0.00000   0.00002   0.00004   0.00006  -3.14158
   D12       -0.00014  -0.00001  -0.00030   0.00009  -0.00021  -0.00035
   D13        0.00038   0.00001   0.00028  -0.00021   0.00007   0.00045
   D14       -3.14150   0.00002   0.00036  -0.00004   0.00032  -3.14118
   D15       -3.14112   0.00002   0.00060  -0.00026   0.00034  -3.14077
   D16        0.00018   0.00003   0.00069  -0.00009   0.00060   0.00078
   D17       -3.13998  -0.00006  -0.00116  -0.00032  -0.00148  -3.14146
   D18       -0.00260   0.00011   0.00252   0.00047   0.00298   0.00038
   D19        0.00151  -0.00008  -0.00148  -0.00028  -0.00175  -0.00024
   D20        3.13890   0.00010   0.00219   0.00051   0.00271  -3.14158
   D21       -0.00048   0.00000  -0.00023   0.00023   0.00001  -0.00047
   D22        3.14021   0.00001  -0.00025   0.00046   0.00021   3.14042
   D23        3.14141  -0.00001  -0.00031   0.00006  -0.00026   3.14116
   D24       -0.00108   0.00000  -0.00034   0.00029  -0.00005  -0.00113
   D25       -0.00146   0.00002   0.00025   0.00035   0.00059  -0.00087
   D26       -3.14154  -0.00001  -0.00011  -0.00008  -0.00019   3.14145
   D27        3.13983   0.00003   0.00034   0.00052   0.00086   3.14069
   D28       -0.00025   0.00000  -0.00002   0.00010   0.00007  -0.00018
   D29        0.00020   0.00000   0.00004  -0.00009  -0.00005   0.00015
   D30        3.14152   0.00000   0.00006  -0.00003   0.00004   3.14155
   D31       -3.14052  -0.00001   0.00007  -0.00031  -0.00025  -3.14077
   D32        0.00079  -0.00001   0.00009  -0.00025  -0.00016   0.00063
   D33        0.00093  -0.00002  -0.00032  -0.00022  -0.00054   0.00040
   D34       -3.14070  -0.00003  -0.00052  -0.00019  -0.00071  -3.14141
   D35        3.14112   0.00001   0.00002   0.00018   0.00020   3.14132
   D36       -0.00051   0.00000  -0.00018   0.00020   0.00002  -0.00049
   D37       -0.00789   0.00004  -0.00088   0.00215   0.00127  -0.00662
   D38        3.13513   0.00001  -0.00122   0.00175   0.00053   3.13566
   D39       -0.00205   0.00008   0.00140   0.00041   0.00181  -0.00024
   D40        3.14015   0.00006   0.00120   0.00025   0.00145  -3.14159
   D41       -3.13944  -0.00010  -0.00226  -0.00038  -0.00265   3.14110
   D42        0.00276  -0.00011  -0.00247  -0.00054  -0.00301  -0.00025
   D43        0.00088  -0.00003  -0.00055  -0.00017  -0.00072   0.00016
   D44       -3.14131  -0.00002  -0.00034  -0.00002  -0.00036   3.14151
   D45       -3.14067  -0.00002  -0.00035  -0.00020  -0.00055  -3.14122
   D46        0.00032  -0.00001  -0.00014  -0.00004  -0.00019   0.00013
   D47        3.14134   0.00001   0.00028   0.00003   0.00031  -3.14154
   D48       -0.00023   0.00001   0.00017   0.00004   0.00021  -0.00002
   D49       -0.00029   0.00001   0.00008   0.00005   0.00013  -0.00015
   D50        3.14132   0.00000  -0.00003   0.00007   0.00003   3.14136
   D51        3.14087   0.00002   0.00032   0.00015   0.00048   3.14135
   D52       -0.00049   0.00001   0.00020   0.00009   0.00029  -0.00019
   D53       -0.00013   0.00001   0.00012   0.00000   0.00012  -0.00001
   D54       -3.14148   0.00000   0.00000  -0.00006  -0.00006  -3.14155
   D55        0.00006   0.00000   0.00001  -0.00002  -0.00001   0.00006
   D56       -3.14154   0.00000  -0.00007   0.00001  -0.00006   3.14158
   D57       -3.14155   0.00001   0.00013  -0.00004   0.00009  -3.14146
   D58        0.00003   0.00000   0.00004   0.00000   0.00004   0.00007
   D59       -0.00009   0.00000  -0.00003   0.00003   0.00000  -0.00009
   D60       -3.14157   0.00000  -0.00007   0.00001  -0.00006   3.14155
   D61        3.14126   0.00001   0.00010   0.00009   0.00019   3.14145
   D62       -0.00022   0.00001   0.00005   0.00007   0.00013  -0.00009
   D63        0.00013   0.00000  -0.00004  -0.00002  -0.00006   0.00007
   D64       -3.14158   0.00000   0.00000   0.00000   0.00000  -3.14158
   D65       -3.14145   0.00000   0.00004  -0.00005  -0.00001  -3.14146
   D66        0.00003   0.00000   0.00009  -0.00004   0.00005   0.00008
         Item               Value     Threshold  Converged?
 Maximum Force            0.000111     0.000450     YES
 RMS     Force            0.000032     0.000300     YES
 Maximum Displacement     0.003892     0.001800     NO 
 RMS     Displacement     0.000684     0.001200     YES
 Predicted change in Energy=-1.083742D-06
 GradGradGradGradGradGradGradGradGradGradGradGradGradGradGradGradGradGrad

 Leave Link  103 at Thu Jan 09 22:55:31 2020, MaxMem=   134217728 cpu:         0.0
 (Enter E:\Gaussian\G09W\l202.exe)
                          Input orientation:                          
 ---------------------------------------------------------------------
 Center     Atomic      Atomic             Coordinates (Angstroms)
 Number     Number       Type             X           Y           Z
 ---------------------------------------------------------------------
      1          6           0       -3.745066    0.642774    0.000612
      2          6           0       -4.782250    1.558751    0.000464
      3          6           0       -6.118199    1.138567    0.000588
      4          6           0       -6.417665   -0.255517    0.000749
      5          6           0       -5.338820   -1.173885    0.001336
      6          6           0       -4.031642   -0.732277    0.001179
      7          1           0       -2.715895    0.982562    0.000512
      8          1           0       -4.587620    2.624098    0.000353
      9          1           0       -5.512010   -2.244930    0.002567
     10          1           0       -3.223288   -1.454464    0.001674
     11          6           0       -7.780205   -0.675185    0.000366
     12          6           0       -7.184212    2.154021    0.001016
     13          6           0       -8.849191    0.266683    0.000876
     14          6           0       -8.567795    1.658507    0.001300
     15          6           0      -10.196255   -0.167511    0.000710
     16          6           0       -9.628900    2.573150    0.001704
     17          6           0      -11.205714    0.768788    0.001148
     18          1           0      -10.417037   -1.225236    0.000169
     19          6           0      -10.944707    2.148468    0.001692
     20          1           0       -9.393413    3.630115    0.001979
     21          1           0      -11.758456    2.861880    0.002042
     22         35           0      -13.030025    0.177783    0.000908
     23          8           0       -6.928743    3.365505    0.000861
     24          8           0       -8.146431   -1.971742    0.000325
     25          1           0       -7.384875   -2.563723   -0.005330
 ---------------------------------------------------------------------
                    Distance matrix (angstroms):
                    1          2          3          4          5
     1  C    0.000000
     2  C    1.383750   0.000000
     3  C    2.424370   1.400470   0.000000
     4  C    2.819523   2.442571   1.425885   0.000000
     5  C    2.416672   2.788740   2.440259   1.416794   0.000000
     6  C    1.404597   2.410856   2.802460   2.433189   1.379758
     7  H    1.083813   2.145185   3.405879   3.903325   3.395586
     8  H    2.153031   1.082980   2.132950   3.411927   3.871560
     9  H    3.385400   3.873054   3.437371   2.185858   1.084958
    10  H    2.161171   3.392614   3.886428   3.411967   2.134058
    11  C    4.244922   3.738744   2.460073   1.425706   2.491799
    12  C    3.756540   2.474625   1.472254   2.528531   3.805315
    13  C    5.117962   4.267253   2.866792   2.486969   3.794462
    14  C    4.928532   3.786859   2.504168   2.878636   4.295197
    15  C    6.501876   5.682555   4.282099   3.779615   4.960590
    16  C    6.192402   4.951668   3.792499   4.279414   5.696055
    17  C    7.461712   6.471857   5.100936   4.896388   6.180164
    18  H    6.928540   6.285015   4.905871   4.115256   5.078477
    19  C    7.355402   6.190609   4.931032   5.125744   6.516440
    20  H    6.389681   5.055034   4.115196   4.894203   6.286345
    21  H    8.314978   7.096873   5.897653   6.184030   7.582818
    22  Br   9.296595   8.362587   6.978283   6.626541   7.809074
    23  O    4.189160   2.805671   2.369860   3.656912   4.809773
    24  O    5.119346   4.876689   3.713185   2.435992   2.918776
    25  H    4.850760   4.875294   3.912985   2.502668   2.473467
                    6          7          8          9         10
     6  C    0.000000
     7  H    2.161450   0.000000
     8  H    3.402113   2.489578   0.000000
     9  H    2.116509   4.270243   4.956000   0.000000
    10  H    1.083969   2.489286   4.300706   2.421381   0.000000
    11  C    3.748998   5.328730   4.591064   2.758407   4.623069
    12  C    4.274274   4.619326   2.638800   4.706063   5.358179
    13  C    4.920031   6.174934   4.870153   4.176719   5.883293
    14  C    5.127625   5.890810   4.095627   4.957282   6.185009
    15  C    6.190429   7.568253   6.264971   5.124239   7.090735
    16  C    6.500396   7.093632   5.041537   6.337403   7.566606
    17  C    7.329428   8.492511   6.873234   6.442109   8.286253
    18  H    6.404396   8.011365   6.985662   5.009898   7.197401
    19  C    7.489270   8.310998   6.374855   6.986855   8.520647
    20  H    6.912240   7.183230   4.909961   7.041409   7.995210
    21  H    8.521833   9.235787   7.174778   8.068308   9.564514
    22  Br   9.044286  10.345480   8.789690   7.898739   9.941646
    23  O    5.018468   4.840094   2.455716   5.786546   6.079679
    24  O    4.297413   6.182122   5.812648   2.648548   4.950244
    25  H    3.820787   5.863067   5.893909   1.899820   4.306892
                   11         12         13         14         15
    11  C    0.000000
    12  C    2.891300   0.000000
    13  C    1.424727   2.516783   0.000000
    14  C    2.463010   1.469638   1.419985   0.000000
    15  C    2.468811   3.802882   1.415311   2.446675   0.000000
    16  C    3.737560   2.480356   2.434694   1.400898   2.798770
    17  C    3.717415   4.253393   2.409421   2.783921   1.376831
    18  H    2.693593   4.676594   2.164247   3.425736   1.080522
    19  C    4.241119   3.760499   2.816434   2.426885   2.433915
    20  H    4.597614   2.656958   3.407177   2.137495   3.881562
    21  H    5.323281   4.628691   3.898573   3.410048   3.408472
    22  Br   5.318662   6.170822   4.181779   4.701493   2.854729
    23  O    4.129427   1.238127   3.645657   2.366503   4.812363
    24  O    1.347286   4.236482   2.346150   3.654621   2.730756
    25  H    1.929480   4.722014   3.186763   4.384811   3.694012
                   16         17         18         19         20
    16  C    0.000000
    17  C    2.396261   0.000000
    18  H    3.879291   2.144328   0.000000
    19  C    1.382643   1.404152   3.414721   0.000000
    20  H    1.082881   3.386980   4.962081   2.145178   0.000000
    21  H    2.149041   2.164846   4.301619   1.082195   2.486688
    22  Br   4.159980   1.917654   2.965833   2.869173   5.014334
    23  O    2.814014   5.003541   5.765683   4.196325   2.478834
    24  O    4.780560   4.107277   2.390173   4.980611   5.738970
    25  H    5.605636   5.069959   3.314451   5.905692   6.511368
                   21         22         23         24         25
    21  H    0.000000
    22  Br   2.970062   0.000000
    23  O    4.855901   6.883837   0.000000
    24  O    6.034122   5.335723   5.474392   0.000000
    25  H    6.968891   6.275636   5.946751   0.964593   0.000000
 Stoichiometry    C14H8BrO2(2)
 Framework group  C1[X(C14H8BrO2)]
 Deg. of freedom    69
 Full point group                 C1      NOp   1
 RotChk:  IX=0 Diff= 3.08D-04
 Largest Abelian subgroup         C1      NOp   1
 Largest concise Abelian subgroup C1      NOp   1
                         Standard orientation:                         
 ---------------------------------------------------------------------
 Center     Atomic      Atomic             Coordinates (Angstroms)
 Number     Number       Type             X           Y           Z
 ---------------------------------------------------------------------
      1          6           0       -5.068791    0.090203    0.000281
      2          6           0       -4.031106    1.005611    0.000429
      3          6           0       -2.695387    0.584695    0.000304
      4          6           0       -2.396685   -0.809553    0.000143
      5          6           0       -3.476032   -1.727329   -0.000443
      6          6           0       -4.782969   -1.285006   -0.000286
      7          1           0       -6.097777    0.430554    0.000381
      8          1           0       -4.225152    2.071065    0.000540
      9          1           0       -3.303429   -2.798469   -0.001674
     10          1           0       -5.591718   -2.006749   -0.000782
     11          6           0       -1.034375   -1.229967    0.000527
     12          6           0       -1.628818    1.599565   -0.000123
     13          6           0        0.035127   -0.288684    0.000017
     14          6           0       -0.245507    1.103293   -0.000407
     15          6           0        1.381952   -0.723616    0.000182
     16          6           0        0.816099    2.017355   -0.000812
     17          6           0        2.391925    0.212130   -0.000256
     18          1           0        1.602156   -1.781462    0.000724
     19          6           0        2.131673    1.591953   -0.000799
     20          1           0        0.581191    3.074449   -0.001087
     21          1           0        2.945813    2.304919   -0.001150
     22         35           0        4.215911   -0.379875   -0.000015
     23          8           0       -1.883623    2.811189    0.000031
     24          8           0       -0.668859   -2.526724    0.000567
     25          1           0       -1.430739   -3.118288    0.006223
 ---------------------------------------------------------------------
 Rotational constants (GHZ):      0.9829874      0.1774863      0.1503410
 Leave Link  202 at Thu Jan 09 22:55:31 2020, MaxMem=   134217728 cpu:         0.0
 (Enter E:\Gaussian\G09W\l301.exe)
 Standard basis: 6-311G(d) (5D, 7F)
 Ernie: Thresh=  0.10000D-02 Tol=  0.10000D-05 Strict=F.
 There are   375 symmetry adapted cartesian basis functions of A   symmetry.
 There are   356 symmetry adapted basis functions of A   symmetry.
   356 basis functions,   642 primitive gaussians,   375 cartesian basis functions
    72 alpha electrons       71 beta electrons
       nuclear repulsion energy      1393.0647270263 Hartrees.
 IExCor=  402 DFT=T Ex+Corr=B3LYP ExCW=0 ScaHFX=  0.200000
 ScaDFX=  0.800000  0.720000  1.000000  0.810000 ScalE2=  1.000000  1.000000
 IRadAn=      0 IRanWt=     -1 IRanGd=            0 ICorTp=0 IEmpDi=141
 NAtoms=   25 NActive=   25 NUniq=   25 SFac= 1.00D+00 NAtFMM=   60 NAOKFM=F Big=F
 Integral buffers will be    262144 words long.
 Raffenetti 2 integral format.
 Two-electron integral symmetry is turned on.
 R6Disp:  Grimme-D3(BJ) Dispersion energy=       -0.0633808563 Hartrees.
 Nuclear repulsion after empirical dispersion term =     1393.0013461700 Hartrees.
 ------------------------------------------------------------------------------
 Polarizable Continuum Model (PCM)
 =================================
 Model                : PCM (using non-symmetric T matrix).
 Atomic radii         : UFF (Universal Force Field).
 Polarization charges : Total charges.
 Charge compensation  : None.
 Solution method      : On-the-fly selection.
 Cavity type          : Scaled VdW (van der Waals Surface) (Alpha=1.100).
 Cavity algorithm     : GePol (No added spheres)
                        Default sphere list used, NSphG=   25.
                        Lebedev-Laikov grids with approx.  5.0 points / Ang**2.
                        Smoothing algorithm: Karplus/York (Gamma=1.0000).
                        Polarization charges: spherical gaussians, with
                                              point-specific exponents (IZeta= 3).
                        Self-potential: point-specific (ISelfS= 7).
                        Self-field    : sphere-specific E.n sum rule (ISelfD= 2).
 1st derivatives      : Analytical E(r).r(x)/FMM algorithm (CHGder, D1EAlg=3).
                        Cavity 1st derivative terms included.
 Solvent              : Acetonitrile, Eps=  35.688000 Eps(inf)=   1.806874
 ------------------------------------------------------------------------------
 GePol: Number of generator spheres                  =      25
 GePol: Total number of spheres                      =      25
 GePol: Number of exposed spheres                    =      25 (100.00%)
 GePol: Number of points                             =    2192
 GePol: Average weight of points                     =       0.13
 GePol: Minimum weight of points                     =   0.31D-10
 GePol: Maximum weight of points                     =    0.20577
 GePol: Number of points with low weight             =     137
 GePol: Fraction of low-weight points (<1% of avg)   =       6.25%
 GePol: Cavity surface area                          =    281.130 Ang**2
 GePol: Cavity volume                                =    308.176 Ang**3
 Leave Link  301 at Thu Jan 09 22:55:32 2020, MaxMem=   134217728 cpu:         1.0
 (Enter E:\Gaussian\G09W\l302.exe)
 NPDir=0 NMtPBC=     1 NCelOv=     1 NCel=       1 NClECP=     1 NCelD=      1
         NCelK=      1 NCelE2=     1 NClLst=     1 CellRange=     0.0.
 One-electron integrals computed using PRISM.
 NBasis=   356 RedAO= T EigKep=  8.58D-05  NBF=   356
 NBsUse=   356 1.00D-06 EigRej= -1.00D+00 NBFU=   356
 Precomputing XC quadrature grid using
 IXCGrd= 4 IRadAn=           0 IRanWt=          -1 IRanGd=           0 AccXCQ= 0.00D+00.
 Generated NRdTot=       0 NPtTot=           0 NUsed=           0 NTot=          16
 NSgBfM=   363   363   364   364   364 MxSgAt=    25 MxSgA2=    25.
 Leave Link  302 at Thu Jan 09 22:55:34 2020, MaxMem=   134217728 cpu:         2.0
 (Enter E:\Gaussian\G09W\l303.exe)
 DipDrv:  MaxL=1.
 Leave Link  303 at Thu Jan 09 22:55:34 2020, MaxMem=   134217728 cpu:         0.0
 (Enter E:\Gaussian\G09W\l401.exe)
 Initial guess from the checkpoint file:  "E:\Gaussian file\2-BrHAQ opt.chk"
 B after Tr=     0.000000    0.000000    0.000000
         Rot=    1.000000    0.000083   -0.000014    0.000001 Ang=   0.01 deg.
 Guess basis will be translated and rotated to current coordinates.
 JPrj=2 DoOrth=T DoCkMO=T.
 Initial guess <Sx>= 0.0000 <Sy>= 0.0000 <Sz>= 0.5000 <S**2>= 0.7729 S= 0.5114
 Leave Link  401 at Thu Jan 09 22:55:37 2020, MaxMem=   134217728 cpu:         3.0
 (Enter E:\Gaussian\G09W\l502.exe)
 UHF open shell SCF:
 Using DIIS extrapolation, IDIIS=  1040.
 Integral symmetry usage will be decided dynamically.
 IVT=      444890 IEndB=      444890 NGot=   134217728 MDV=   133930479
 LenX=   133930479 LenY=   133789413
 Requested convergence on RMS density matrix=1.00D-08 within 128 cycles.
 Requested convergence on MAX density matrix=1.00D-06.
 Requested convergence on             energy=1.00D-06.
 No special actions if energy rises.
 Fock matrices will be formed incrementally for  20 cycles.

 Cycle   1  Pass 1  IDiag  1:
 FoFJK:  IHMeth= 1 ICntrl=       0 DoSepK=F KAlg= 0 I1Cent=   0 FoldK=F
 IRaf= 780000000 NMat=   1 IRICut=       1 DoRegI=T DoRafI=F ISym2E= 0.
 FoFCou: FMM=F IPFlag=           0 FMFlag=      100000 FMFlg1=           0
         NFxFlg=           0 DoJE=F BraDBF=F KetDBF=F FulRan=T
         wScrn=  0.000000 ICntrl=       0 IOpCl=  1 I1Cent=           0 NGrid=           0
         NMat0=    1 NMatS0=      1 NMatT0=    0 NMatD0=    1 NMtDS0=    0 NMtDT0=    0
 Symmetry not used in FoFCou.
 Inv3:  Mode=1 IEnd=    14414592.
 Iteration    1 A*A^-1 deviation from unit magnitude is 2.22D-15 for    336.
 Iteration    1 A*A^-1 deviation from orthogonality  is 3.68D-15 for    924    832.
 Iteration    1 A^-1*A deviation from unit magnitude is 2.44D-15 for    271.
 Iteration    1 A^-1*A deviation from orthogonality  is 1.06D-13 for   1618   1572.
 E= -3263.12403925828    
 DIIS: error= 1.07D-04 at cycle   1 NSaved=   1.
 NSaved= 1 IEnMin= 1 EnMin= -3263.12403925828     IErMin= 1 ErrMin= 1.07D-04
 ErrMax= 1.07D-04  0.00D+00 EMaxC= 1.00D-01 BMatC= 1.10D-05 BMatP= 1.10D-05
 IDIUse=3 WtCom= 9.99D-01 WtEn= 1.07D-03
 Coeff-Com:  0.100D+01
 Coeff-En:   0.100D+01
 Coeff:      0.100D+01
 Gap=     0.728 Goal=   None    Shift=    0.000
 Gap=     0.797 Goal=   None    Shift=    0.000
 RMSDP=1.94D-05 MaxDP=8.65D-04              OVMax= 8.30D-04

 Cycle   2  Pass 1  IDiag  1:
 RMSU=  1.94D-05    CP:  1.00D+00
 E= -3263.12404399245     Delta-E=       -0.000004734171 Rises=F Damp=F
 DIIS: error= 2.11D-05 at cycle   2 NSaved=   2.
 NSaved= 2 IEnMin= 2 EnMin= -3263.12404399245     IErMin= 2 ErrMin= 2.11D-05
 ErrMax= 2.11D-05  0.00D+00 EMaxC= 1.00D-01 BMatC= 2.15D-07 BMatP= 1.10D-05
 IDIUse=1 WtCom= 1.00D+00 WtEn= 0.00D+00
 Coeff-Com: -0.632D-01 0.106D+01
 Coeff:     -0.632D-01 0.106D+01
 Gap=     0.112 Goal=   None    Shift=    0.000
 Gap=     0.133 Goal=   None    Shift=    0.000
 RMSDP=1.55D-06 MaxDP=5.22D-05 DE=-4.73D-06 OVMax= 1.29D-04

 Cycle   3  Pass 1  IDiag  1:
 RMSU=  1.35D-06    CP:  1.00D+00  1.04D+00
 E= -3263.12404405242     Delta-E=       -0.000000059968 Rises=F Damp=F
 DIIS: error= 8.30D-06 at cycle   3 NSaved=   3.
 NSaved= 3 IEnMin= 3 EnMin= -3263.12404405242     IErMin= 3 ErrMin= 8.30D-06
 ErrMax= 8.30D-06  0.00D+00 EMaxC= 1.00D-01 BMatC= 8.42D-08 BMatP= 2.15D-07
 IDIUse=1 WtCom= 1.00D+00 WtEn= 0.00D+00
 Coeff-Com: -0.312D-01 0.416D+00 0.616D+00
 Coeff:     -0.312D-01 0.416D+00 0.616D+00
 Gap=     0.112 Goal=   None    Shift=    0.000
 Gap=     0.133 Goal=   None    Shift=    0.000
 RMSDP=1.02D-06 MaxDP=4.16D-05 DE=-6.00D-08 OVMax= 5.79D-05

 Cycle   4  Pass 1  IDiag  1:
 RMSU=  7.92D-07    CP:  1.00D+00  1.04D+00  5.45D-01
 E= -3263.12404406063     Delta-E=       -0.000000008209 Rises=F Damp=F
 DIIS: error= 7.16D-06 at cycle   4 NSaved=   4.
 NSaved= 4 IEnMin= 4 EnMin= -3263.12404406063     IErMin= 4 ErrMin= 7.16D-06
 ErrMax= 7.16D-06  0.00D+00 EMaxC= 1.00D-01 BMatC= 4.87D-08 BMatP= 8.42D-08
 IDIUse=1 WtCom= 1.00D+00 WtEn= 0.00D+00
 Coeff-Com: -0.110D-01 0.131D+00 0.426D+00 0.454D+00
 Coeff:     -0.110D-01 0.131D+00 0.426D+00 0.454D+00
 Gap=     0.112 Goal=   None    Shift=    0.000
 Gap=     0.133 Goal=   None    Shift=    0.000
 RMSDP=5.37D-07 MaxDP=2.36D-05 DE=-8.21D-09 OVMax= 2.69D-05

 Cycle   5  Pass 1  IDiag  1:
 RMSU=  1.82D-07    CP:  1.00D+00  1.04D+00  7.49D-01  4.83D-01
 E= -3263.12404407077     Delta-E=       -0.000000010136 Rises=F Damp=F
 DIIS: error= 1.16D-06 at cycle   5 NSaved=   5.
 NSaved= 5 IEnMin= 5 EnMin= -3263.12404407077     IErMin= 5 ErrMin= 1.16D-06
 ErrMax= 1.16D-06  0.00D+00 EMaxC= 1.00D-01 BMatC= 1.22D-09 BMatP= 4.87D-08
 IDIUse=1 WtCom= 1.00D+00 WtEn= 0.00D+00
 Coeff-Com: -0.132D-02 0.733D-02 0.116D+00 0.183D+00 0.695D+00
 Coeff:     -0.132D-02 0.733D-02 0.116D+00 0.183D+00 0.695D+00
 Gap=     0.112 Goal=   None    Shift=    0.000
 Gap=     0.133 Goal=   None    Shift=    0.000
 RMSDP=1.27D-07 MaxDP=5.30D-06 DE=-1.01D-08 OVMax= 1.10D-05

 Cycle   6  Pass 1  IDiag  1:
 RMSU=  7.57D-08    CP:  1.00D+00  1.04D+00  7.37D-01  5.95D-01  7.86D-01
 E= -3263.12404407088     Delta-E=       -0.000000000116 Rises=F Damp=F
 DIIS: error= 1.02D-06 at cycle   6 NSaved=   6.
 NSaved= 6 IEnMin= 6 EnMin= -3263.12404407088     IErMin= 6 ErrMin= 1.02D-06
 ErrMax= 1.02D-06  0.00D+00 EMaxC= 1.00D-01 BMatC= 7.84D-10 BMatP= 1.22D-09
 IDIUse=1 WtCom= 1.00D+00 WtEn= 0.00D+00
 Coeff-Com:  0.183D-02-0.296D-01-0.207D-01 0.212D-01 0.507D+00 0.521D+00
 Coeff:      0.183D-02-0.296D-01-0.207D-01 0.212D-01 0.507D+00 0.521D+00
 Gap=     0.112 Goal=   None    Shift=    0.000
 Gap=     0.133 Goal=   None    Shift=    0.000
 RMSDP=6.01D-08 MaxDP=2.40D-06 DE=-1.16D-10 OVMax= 5.94D-06

 Cycle   7  Pass 1  IDiag  1:
 RMSU=  2.48D-08    CP:  1.00D+00  1.04D+00  7.56D-01  5.71D-01  9.55D-01
                    CP:  6.05D-01
 E= -3263.12404407110     Delta-E=       -0.000000000222 Rises=F Damp=F
 DIIS: error= 1.52D-07 at cycle   7 NSaved=   7.
 NSaved= 7 IEnMin= 7 EnMin= -3263.12404407110     IErMin= 7 ErrMin= 1.52D-07
 ErrMax= 1.52D-07  0.00D+00 EMaxC= 1.00D-01 BMatC= 2.02D-11 BMatP= 7.84D-10
 IDIUse=1 WtCom= 1.00D+00 WtEn= 0.00D+00
 Coeff-Com:  0.703D-03-0.100D-01-0.173D-01-0.104D-01 0.102D+00 0.164D+00
 Coeff-Com:  0.771D+00
 Coeff:      0.703D-03-0.100D-01-0.173D-01-0.104D-01 0.102D+00 0.164D+00
 Coeff:      0.771D+00
 Gap=     0.112 Goal=   None    Shift=    0.000
 Gap=     0.133 Goal=   None    Shift=    0.000
 RMSDP=1.26D-08 MaxDP=5.65D-07 DE=-2.22D-10 OVMax= 1.16D-06

 Cycle   8  Pass 1  IDiag  1:
 RMSU=  1.00D-08    CP:  1.00D+00  1.04D+00  7.57D-01  5.76D-01  9.65D-01
                    CP:  6.77D-01  1.05D+00
 E= -3263.12404407109     Delta-E=        0.000000000009 Rises=F Damp=F
 DIIS: error= 1.00D-07 at cycle   8 NSaved=   8.
 NSaved= 8 IEnMin= 7 EnMin= -3263.12404407110     IErMin= 8 ErrMin= 1.00D-07
 ErrMax= 1.00D-07  0.00D+00 EMaxC= 1.00D-01 BMatC= 1.04D-11 BMatP= 2.02D-11
 IDIUse=1 WtCom= 1.00D+00 WtEn= 0.00D+00
 Coeff-Com: -0.686D-04 0.211D-02-0.453D-02-0.115D-01-0.730D-01-0.379D-01
 Coeff-Com:  0.470D+00 0.655D+00
 Coeff:     -0.686D-04 0.211D-02-0.453D-02-0.115D-01-0.730D-01-0.379D-01
 Coeff:      0.470D+00 0.655D+00
 Gap=     0.112 Goal=   None    Shift=    0.000
 Gap=     0.133 Goal=   None    Shift=    0.000
 RMSDP=6.06D-09 MaxDP=2.88D-07 DE= 9.09D-12 OVMax= 5.43D-07

 Error on total polarization charges =  0.01434
 SCF Done:  E(UB3LYP) =  -3263.12404407     A.U. after    8 cycles
            NFock=  8  Conv=0.61D-08     -V/T= 2.0017
 <Sx>= 0.0000 <Sy>= 0.0000 <Sz>= 0.5000 <S**2>= 0.7729 S= 0.5114
 <L.S>= 0.000000000000E+00
 KE= 3.257437592289D+03 PE=-1.054432945279D+04 EE= 2.630766470255D+03
 Annihilation of the first spin contaminant:
 S**2 before annihilation     0.7729,   after     0.7504
 Leave Link  502 at Thu Jan 09 23:06:11 2020, MaxMem=   134217728 cpu:       634.0
 (Enter E:\Gaussian\G09W\l701.exe)
 Compute integral first derivatives.
 ... and contract with generalized density number  0.
 R6Disp: Adding Grimme-D3(BJ) dispersion energy 1st derivatives to the gradient.
 D1PCM: PCM CHGder 1st derivatives, ID1Alg=3 FixD1E=F DoIter=F DoCFld=F I1PDM=0.
 GePol: Maximum number of non-zero 1st derivatives   =     349
 Leave Link  701 at Thu Jan 09 23:06:32 2020, MaxMem=   134217728 cpu:        21.0
 (Enter E:\Gaussian\G09W\l702.exe)
 L702 exits ... SP integral derivatives will be done elsewhere.
 Leave Link  702 at Thu Jan 09 23:06:33 2020, MaxMem=   134217728 cpu:         0.0
 (Enter E:\Gaussian\G09W\l703.exe)
 Compute integral first derivatives, UseDBF=F ICtDFT=           0.
 Integral derivatives from FoFJK, PRISM(SPDF).
 Calling FoFJK, ICntrl=      2127 FMM=F ISym2X=0 I1Cent= 0 IOpClX= 1 NMat=1 NMatS=1 NMatT=0.
 FoFJK:  IHMeth= 1 ICntrl=    2127 DoSepK=F KAlg= 0 I1Cent=   0 FoldK=F
 IRaf=         0 NMat=   1 IRICut=       1 DoRegI=T DoRafI=F ISym2E= 0.
 FoFCou: FMM=F IPFlag=           0 FMFlag=      100000 FMFlg1=         800
         NFxFlg=           0 DoJE=F BraDBF=F KetDBF=F FulRan=T
         wScrn=  0.000000 ICntrl=    2127 IOpCl=  1 I1Cent=           0 NGrid=           0
         NMat0=    1 NMatS0=      1 NMatT0=    0 NMatD0=    1 NMtDS0=    0 NMtDT0=    0
 Symmetry not used in FoFCou.
 Leave Link  703 at Thu Jan 09 23:09:58 2020, MaxMem=   134217728 cpu:       205.0
 (Enter E:\Gaussian\G09W\l716.exe)
 Dipole        =-1.29546908D+00-2.20545238D+00 4.03693797D-03
 ***** Axes restored to original set *****
 -------------------------------------------------------------------
 Center     Atomic                   Forces (Hartrees/Bohr)
 Number     Number              X              Y              Z
 -------------------------------------------------------------------
      1        6          -0.000019234    0.000002474   -0.000001062
      2        6          -0.000049108   -0.000002713   -0.000000567
      3        6           0.000002287    0.000022563    0.000016657
      4        6           0.000008787    0.000012621   -0.000014422
      5        6          -0.000004746   -0.000013220    0.000003517
      6        6          -0.000006478   -0.000021090    0.000000417
      7        1          -0.000004174   -0.000011301   -0.000000985
      8        1           0.000035206   -0.000011022   -0.000000277
      9        1          -0.000001672    0.000001697   -0.000006867
     10        1          -0.000009506   -0.000012829    0.000000705
     11        6           0.000012916    0.000031760    0.000022152
     12        6          -0.000021204   -0.000135055   -0.000045848
     13        6           0.000003065   -0.000013556    0.000006395
     14        6           0.000017048    0.000012906    0.000011540
     15        6          -0.000018434    0.000016369   -0.000000353
     16        6           0.000052422   -0.000002341   -0.000000504
     17        6           0.000005251   -0.000012941    0.000000037
     18        1          -0.000004082    0.000006072    0.000001649
     19        6           0.000010858    0.000005233    0.000001299
     20        1          -0.000021190    0.000012295    0.000000400
     21        1           0.000018132    0.000023029   -0.000001114
     22       35           0.000017494    0.000018937    0.000000947
     23        8           0.000024208    0.000062578    0.000016477
     24        8          -0.000043664   -0.000001941   -0.000043373
     25        1          -0.000004180    0.000009477    0.000033180
 -------------------------------------------------------------------
 Cartesian Forces:  Max     0.000135055 RMS     0.000024627
 Leave Link  716 at Thu Jan 09 23:09:59 2020, MaxMem=   134217728 cpu:         0.0
 (Enter E:\Gaussian\G09W\l103.exe)

 GradGradGradGradGradGradGradGradGradGradGradGradGradGradGradGradGradGrad
 Berny optimization.
 Using GEDIIS/GDIIS optimizer.
 FormGI is forming the generalized inverse of G from B-inverse, IUseBI=4.
 Internal  Forces:  Max     0.000066212 RMS     0.000013978
 Search for a local minimum.
 Step number   5 out of a maximum of  146
 All quantities printed in internal units (Hartrees-Bohrs-Radians)
 RMS Force = .13978D-04 SwitMx=.10000D-02 MixMth= 2
 Mixed Optimization -- En-DIIS/RFO-DIIS
 Swapping is turned off.
 Update second derivatives using D2CorX and points    1    2    3    4    5
 DE= -9.74D-07 DEPred=-1.08D-06 R= 8.99D-01
 TightC=F SS=  1.41D+00  RLast= 7.05D-03 DXNew= 2.5227D-01 2.1138D-02
 Trust test= 8.99D-01 RLast= 7.05D-03 DXMaxT set to 1.50D-01
 ITU=  1 -1  1  1  0
     Eigenvalues ---    0.01258   0.01429   0.01625   0.01693   0.01731
     Eigenvalues ---    0.01765   0.01820   0.01862   0.01882   0.02057
     Eigenvalues ---    0.02070   0.02088   0.02102   0.02133   0.02153
     Eigenvalues ---    0.02169   0.02184   0.02188   0.02201   0.02234
     Eigenvalues ---    0.02260   0.04281   0.15583   0.16000   0.16000
     Eigenvalues ---    0.16000   0.16000   0.16018   0.16046   0.16890
     Eigenvalues ---    0.17858   0.21911   0.22396   0.22925   0.23114
     Eigenvalues ---    0.23916   0.24624   0.24728   0.25000   0.25000
     Eigenvalues ---    0.25002   0.25072   0.26264   0.33705   0.34662
     Eigenvalues ---    0.35419   0.35480   0.35513   0.35596   0.35629
     Eigenvalues ---    0.35705   0.35895   0.37431   0.39573   0.40847
     Eigenvalues ---    0.41031   0.41439   0.41989   0.43481   0.44096
     Eigenvalues ---    0.44474   0.45514   0.47188   0.47330   0.48532
     Eigenvalues ---    0.50225   0.54422   0.56307   0.79968
 En-DIIS/RFO-DIIS IScMMF=        0 using points:     5    4    3    2    1
 RFO step:  Lambda=-5.22606559D-08.
 NNeg= 0 NP= 5 Switch=  2.50D-03 Rises=F DC=  6.86D-05 SmlDif=  1.00D-05
 RMS Error=  0.3170854346D-04 NUsed= 5 EDIIS=F
 DidBck=F Rises=F RFO-DIIS coefs:    0.88655    0.05191    0.04600    0.01855   -0.00302
 Iteration  1 RMS(Cart)=  0.00020368 RMS(Int)=  0.00000010
 Iteration  2 RMS(Cart)=  0.00000010 RMS(Int)=  0.00000003
 ITry= 1 IFail=0 DXMaxC= 1.84D-03 DCOld= 1.00D+10 DXMaxT= 1.50D-01 DXLimC= 3.00D+00 Rises=F
 Variable       Old X    -DE/DX   Delta X   Delta X   Delta X     New X
                                 (Linear)    (Quad)   (Total)
    R1        2.61491  -0.00002  -0.00001  -0.00001  -0.00003   2.61488
    R2        2.65430   0.00001  -0.00001   0.00002   0.00001   2.65432
    R3        2.04811   0.00000   0.00000   0.00000  -0.00001   2.04810
    R4        2.64650  -0.00003  -0.00004  -0.00002  -0.00005   2.64645
    R5        2.04653   0.00000  -0.00001   0.00002   0.00001   2.04654
    R6        2.69453  -0.00001   0.00000  -0.00003  -0.00003   2.69451
    R7        2.78216  -0.00006  -0.00010   0.00000  -0.00010   2.78206
    R8        2.67735   0.00000  -0.00002   0.00003   0.00001   2.67736
    R9        2.69419   0.00000  -0.00003   0.00004   0.00002   2.69421
   R10        2.60737  -0.00002  -0.00002  -0.00001  -0.00002   2.60734
   R11        2.05027  -0.00001  -0.00001  -0.00001  -0.00002   2.05025
   R12        2.04840   0.00000  -0.00001   0.00000   0.00000   2.04840
   R13        2.69234  -0.00004  -0.00003  -0.00005  -0.00007   2.69227
   R14        2.54600   0.00000   0.00000   0.00000   0.00000   2.54601
   R15        2.77721  -0.00005  -0.00009   0.00001  -0.00008   2.77713
   R16        2.33972   0.00007   0.00005  -0.00001   0.00004   2.33976
   R17        2.68338  -0.00001   0.00000  -0.00004  -0.00004   2.68335
   R18        2.67455  -0.00001  -0.00003   0.00002  -0.00001   2.67454
   R19        2.64731  -0.00003  -0.00003  -0.00001  -0.00004   2.64727
   R20        2.60183  -0.00003  -0.00001  -0.00003  -0.00005   2.60179
   R21        2.04189   0.00000  -0.00001   0.00001   0.00001   2.04190
   R22        2.61282  -0.00001  -0.00001  -0.00001  -0.00002   2.61279
   R23        2.04635   0.00000  -0.00001   0.00001   0.00000   2.04635
   R24        2.65346   0.00001  -0.00001   0.00003   0.00002   2.65348
   R25        3.62384  -0.00002  -0.00004  -0.00003  -0.00007   3.62377
   R26        2.04505   0.00000   0.00000   0.00000   0.00000   2.04505
   R27        1.82282   0.00000  -0.00001   0.00001   0.00000   1.82282
    A1        2.08875   0.00001   0.00002   0.00002   0.00004   2.08879
    A2        2.09928  -0.00001  -0.00003  -0.00001  -0.00004   2.09925
    A3        2.09515   0.00000   0.00001  -0.00001  -0.00001   2.09515
    A4        2.11345  -0.00001  -0.00001  -0.00003  -0.00004   2.11340
    A5        2.11352  -0.00002  -0.00004  -0.00008  -0.00012   2.11340
    A6        2.05622   0.00004   0.00005   0.00012   0.00017   2.05639
    A7        2.08712   0.00001  -0.00001   0.00004   0.00003   2.08715
    A8        2.07575   0.00000   0.00001  -0.00004  -0.00002   2.07573
    A9        2.12031   0.00000  -0.00001   0.00000  -0.00001   2.12030
   A10        2.06442   0.00001   0.00002  -0.00001   0.00001   2.06443
   A11        2.08118  -0.00001  -0.00002  -0.00001  -0.00003   2.08115
   A12        2.13759   0.00000   0.00000   0.00002   0.00002   2.13761
   A13        2.11058  -0.00001  -0.00001  -0.00001  -0.00002   2.11055
   A14        2.11570   0.00001   0.00000   0.00004   0.00005   2.11575
   A15        2.05690   0.00000   0.00001  -0.00003  -0.00002   2.05688
   A16        2.10206  -0.00001  -0.00001  -0.00001  -0.00002   2.10204
   A17        2.09449   0.00001   0.00001   0.00002   0.00002   2.09451
   A18        2.08664   0.00000   0.00000  -0.00001  -0.00001   2.08663
   A19        2.12054   0.00001   0.00001   0.00001   0.00002   2.12056
   A20        2.14487   0.00003   0.00000   0.00011   0.00011   2.14498
   A21        2.01777  -0.00003  -0.00001  -0.00011  -0.00013   2.01765
   A22        2.03657   0.00002   0.00004   0.00000   0.00004   2.03661
   A23        2.12408  -0.00001  -0.00002  -0.00001  -0.00003   2.12405
   A24        2.12253  -0.00001  -0.00002   0.00001  -0.00001   2.12252
   A25        2.09357  -0.00001  -0.00002   0.00000  -0.00002   2.09355
   A26        2.10751   0.00000   0.00000  -0.00001  -0.00001   2.10751
   A27        2.08210   0.00001   0.00002   0.00001   0.00003   2.08213
   A28        2.11419   0.00000  -0.00001   0.00001   0.00000   2.11419
   A29        2.08628   0.00000   0.00001  -0.00003  -0.00002   2.08627
   A30        2.08271   0.00000  -0.00001   0.00002   0.00002   2.08273
   A31        2.08197  -0.00001  -0.00001  -0.00003  -0.00004   2.08193
   A32        2.08839   0.00000  -0.00001   0.00002   0.00001   2.08840
   A33        2.11283   0.00001   0.00002   0.00001   0.00002   2.11285
   A34        2.11799  -0.00001  -0.00001  -0.00003  -0.00004   2.11795
   A35        2.06299   0.00004   0.00006   0.00011   0.00017   2.06315
   A36        2.10221  -0.00003  -0.00004  -0.00008  -0.00013   2.10208
   A37        2.13164   0.00000  -0.00001   0.00002   0.00000   2.13164
   A38        2.08049   0.00000   0.00000  -0.00002  -0.00002   2.08047
   A39        2.07106   0.00001   0.00001   0.00001   0.00001   2.07107
   A40        2.06997   0.00001   0.00002   0.00000   0.00003   2.06999
   A41        2.10960  -0.00002  -0.00004  -0.00004  -0.00009   2.10952
   A42        2.10362   0.00001   0.00002   0.00004   0.00006   2.10368
   A43        1.95627  -0.00002  -0.00007   0.00000  -0.00007   1.95620
    D1       -0.00024   0.00000  -0.00001   0.00005   0.00004  -0.00020
    D2        3.14124   0.00000  -0.00002   0.00007   0.00006   3.14130
    D3        3.14159   0.00000  -0.00001  -0.00001  -0.00001   3.14158
    D4       -0.00011   0.00000  -0.00001   0.00002   0.00001  -0.00011
    D5        0.00021   0.00000   0.00001  -0.00005  -0.00004   0.00018
    D6       -3.14119   0.00000   0.00002  -0.00009  -0.00007  -3.14126
    D7        3.14157   0.00000   0.00001   0.00001   0.00002   3.14159
    D8        0.00017   0.00000   0.00002  -0.00003  -0.00002   0.00015
    D9       -0.00010   0.00000   0.00000   0.00002   0.00002  -0.00008
   D10        3.14113   0.00000   0.00000   0.00011   0.00011   3.14124
   D11       -3.14158   0.00000   0.00000   0.00000   0.00000  -3.14158
   D12       -0.00035   0.00000   0.00000   0.00009   0.00009  -0.00026
   D13        0.00045   0.00000   0.00002  -0.00010  -0.00008   0.00036
   D14       -3.14118   0.00000   0.00000  -0.00009  -0.00008  -3.14126
   D15       -3.14077   0.00000   0.00002  -0.00019  -0.00017  -3.14095
   D16        0.00078   0.00000   0.00000  -0.00018  -0.00017   0.00061
   D17       -3.14146   0.00000   0.00007  -0.00004   0.00003  -3.14144
   D18        0.00038  -0.00001  -0.00013  -0.00006  -0.00018   0.00020
   D19       -0.00024   0.00001   0.00007   0.00005   0.00012  -0.00012
   D20       -3.14158  -0.00001  -0.00013   0.00004  -0.00009   3.14152
   D21       -0.00047   0.00000  -0.00002   0.00011   0.00009  -0.00039
   D22        3.14042   0.00000  -0.00007   0.00028   0.00021   3.14063
   D23        3.14116   0.00000   0.00000   0.00009   0.00009   3.14124
   D24       -0.00113   0.00000  -0.00005   0.00026   0.00021  -0.00093
   D25       -0.00087   0.00000  -0.00006   0.00020   0.00014  -0.00072
   D26        3.14145   0.00000  -0.00001   0.00004   0.00003   3.14148
   D27        3.14069   0.00000  -0.00007   0.00022   0.00015   3.14083
   D28       -0.00018   0.00000  -0.00002   0.00006   0.00003  -0.00015
   D29        0.00015   0.00000   0.00000  -0.00003  -0.00003   0.00012
   D30        3.14155   0.00000  -0.00001   0.00001   0.00000   3.14156
   D31       -3.14077   0.00000   0.00005  -0.00020  -0.00014  -3.14092
   D32        0.00063   0.00000   0.00004  -0.00015  -0.00011   0.00052
   D33        0.00040   0.00000   0.00003  -0.00009  -0.00006   0.00034
   D34       -3.14141   0.00000   0.00003  -0.00004  -0.00001  -3.14141
   D35        3.14132   0.00000  -0.00001   0.00006   0.00004   3.14136
   D36       -0.00049   0.00000  -0.00001   0.00011   0.00010  -0.00039
   D37       -0.00662   0.00003  -0.00032   0.00158   0.00125  -0.00536
   D38        3.13566   0.00003  -0.00028   0.00142   0.00115   3.13681
   D39       -0.00024  -0.00001  -0.00009   0.00006  -0.00003  -0.00027
   D40       -3.14159   0.00000  -0.00006   0.00000  -0.00006   3.14153
   D41        3.14110   0.00001   0.00010   0.00007   0.00018   3.14128
   D42       -0.00025   0.00001   0.00013   0.00001   0.00015  -0.00010
   D43        0.00016   0.00000   0.00005  -0.00004   0.00001   0.00017
   D44        3.14151   0.00000   0.00002   0.00002   0.00004   3.14155
   D45       -3.14122   0.00000   0.00004  -0.00009  -0.00005  -3.14127
   D46        0.00013   0.00000   0.00002  -0.00003  -0.00002   0.00011
   D47       -3.14154   0.00000  -0.00002  -0.00002  -0.00003  -3.14157
   D48       -0.00002   0.00000  -0.00001   0.00000  -0.00001  -0.00003
   D49       -0.00015   0.00000  -0.00002   0.00004   0.00002  -0.00013
   D50        3.14136   0.00000  -0.00001   0.00006   0.00005   3.14141
   D51        3.14135   0.00000  -0.00003   0.00006   0.00003   3.14138
   D52       -0.00019   0.00000  -0.00002   0.00004   0.00002  -0.00018
   D53       -0.00001   0.00000   0.00000   0.00000   0.00000  -0.00001
   D54       -3.14155   0.00000   0.00000  -0.00002  -0.00001  -3.14156
   D55        0.00006   0.00000   0.00000  -0.00001  -0.00001   0.00005
   D56        3.14158   0.00000   0.00000   0.00000   0.00001   3.14159
   D57       -3.14146   0.00000   0.00000  -0.00003  -0.00003  -3.14149
   D58        0.00007   0.00000   0.00000  -0.00002  -0.00002   0.00005
   D59       -0.00009   0.00000  -0.00001   0.00002   0.00001  -0.00008
   D60        3.14155   0.00000   0.00000   0.00001   0.00001   3.14157
   D61        3.14145   0.00000  -0.00002   0.00004   0.00003   3.14147
   D62       -0.00009   0.00000  -0.00001   0.00004   0.00003  -0.00006
   D63        0.00007   0.00000   0.00001  -0.00002  -0.00001   0.00006
   D64       -3.14158   0.00000   0.00000  -0.00001  -0.00001  -3.14159
   D65       -3.14146   0.00000   0.00001  -0.00003  -0.00002  -3.14148
   D66        0.00008   0.00000   0.00000  -0.00002  -0.00003   0.00005
         Item               Value     Threshold  Converged?
 Maximum Force            0.000066     0.000450     YES
 RMS     Force            0.000014     0.000300     YES
 Maximum Displacement     0.001836     0.001800     NO 
 RMS     Displacement     0.000204     0.001200     YES
 Predicted change in Energy=-6.836444D-08
 Lowest energy point so far.  Saving SCF results.
 GradGradGradGradGradGradGradGradGradGradGradGradGradGradGradGradGradGrad

 Leave Link  103 at Thu Jan 09 23:09:59 2020, MaxMem=   134217728 cpu:         0.0
 (Enter E:\Gaussian\G09W\l202.exe)
                          Input orientation:                          
 ---------------------------------------------------------------------
 Center     Atomic      Atomic             Coordinates (Angstroms)
 Number     Number       Type             X           Y           Z
 ---------------------------------------------------------------------
      1          6           0       -3.745141    0.642821    0.000666
      2          6           0       -4.782314    1.558788    0.000576
      3          6           0       -6.118217    1.138552    0.000634
      4          6           0       -6.417661   -0.255522    0.000690
      5          6           0       -5.338812   -1.173888    0.001140
      6          6           0       -4.031658   -0.732250    0.001057
      7          1           0       -2.715986    0.982644    0.000608
      8          1           0       -4.587554    2.624116    0.000546
      9          1           0       -5.511946   -2.244932    0.002096
     10          1           0       -3.223290   -1.454418    0.001443
     11          6           0       -7.780216   -0.675173    0.000339
     12          6           0       -7.184215    2.153946    0.000985
     13          6           0       -8.849177    0.266664    0.000810
     14          6           0       -8.567764    1.658465    0.001236
     15          6           0      -10.196231   -0.167548    0.000672
     16          6           0       -9.628825    2.573127    0.001647
     17          6           0      -11.205653    0.768757    0.001110
     18          1           0      -10.417015   -1.225276    0.000173
     19          6           0      -10.944617    2.148441    0.001639
     20          1           0       -9.393480    3.630127    0.001937
     21          1           0      -11.758309    2.861917    0.001980
     22         35           0      -13.029929    0.177771    0.000916
     23          8           0       -6.928732    3.365449    0.001019
     24          8           0       -8.146600   -1.971687    0.000242
     25          1           0       -7.385071   -2.563710   -0.004359
 ---------------------------------------------------------------------
                    Distance matrix (angstroms):
                    1          2          3          4          5
     1  C    0.000000
     2  C    1.383735   0.000000
     3  C    2.424303   1.400441   0.000000
     4  C    2.819466   2.442556   1.425872   0.000000
     5  C    2.416655   2.788765   2.440257   1.416797   0.000000
     6  C    1.404604   2.410879   2.802433   2.433163   1.379745
     7  H    1.083808   2.145146   3.405802   3.903262   3.395563
     8  H    2.152949   1.082985   2.133033   3.411980   3.871592
     9  H    3.385369   3.873068   3.437374   2.185881   1.084948
    10  H    2.161189   3.392634   3.886399   3.411944   2.134041
    11  C    4.244872   3.738716   2.460048   1.425714   2.491820
    12  C    3.756425   2.474538   1.472200   2.528465   3.805258
    13  C    5.117878   4.267196   2.866763   2.486955   3.794450
    14  C    4.928410   3.786762   2.504114   2.878591   4.295155
    15  C    6.501790   5.682494   4.282067   3.779594   4.960569
    16  C    6.192239   4.951520   3.792409   4.279349   5.695993
    17  C    7.461575   6.471741   5.100858   4.896326   6.180104
    18  H    6.928470   6.284972   4.905848   4.115246   5.078463
    19  C    7.355227   6.190451   4.930924   5.125658   6.516358
    20  H    6.389659   5.055028   4.115251   4.894258   6.286406
    21  H    8.314761   7.096665   5.897509   6.183926   7.582721
    22  Br   9.296428   8.362438   6.978170   6.626449   7.808986
    23  O    4.189028   2.805554   2.369810   3.656859   4.809722
    24  O    5.119423   4.876748   3.713209   2.436073   2.918930
    25  H    4.850872   4.875383   3.913016   2.502727   2.473623
                    6          7          8          9         10
     6  C    0.000000
     7  H    2.161447   0.000000
     8  H    3.402089   2.489417   0.000000
     9  H    2.116474   4.270204   4.956020   0.000000
    10  H    1.083967   2.489302   4.300657   2.421334   0.000000
    11  C    3.748992   5.328675   4.591121   2.758477   4.623072
    12  C    4.274195   4.619201   2.638884   4.706019   5.358098
    13  C    4.919992   6.174841   4.870217   4.176749   5.883258
    14  C    5.127551   5.890674   4.095675   4.957271   6.184937
    15  C    6.190384   7.568158   6.265034   5.124262   7.090694
    16  C    6.500292   7.093446   5.041529   6.337380   7.566505
    17  C    7.329340   8.492361   6.873252   6.442098   8.286171
    18  H    6.404363   8.011289   6.985731   5.009931   7.197374
    19  C    7.489152   8.310804   6.374835   6.986820   8.520533
    20  H    6.912270   7.183182   4.910091   7.041494   7.995239
    21  H    8.521688   9.235544   7.174697   8.068269   9.564376
    22  Br   9.044171  10.345301   8.789670   7.898707   9.941540
    23  O    5.018383   4.839937   2.455746   5.786507   6.079590
    24  O    4.297552   6.182203   5.812763   2.648786   4.950409
    25  H    3.820950   5.863191   5.894036   1.900068   4.307085
                   11         12         13         14         15
    11  C    0.000000
    12  C    2.891216   0.000000
    13  C    1.424688   2.516730   0.000000
    14  C    2.462945   1.469595   1.419966   0.000000
    15  C    2.468768   3.802838   1.415308   2.446677   0.000000
    16  C    3.737487   2.480289   2.434671   1.400877   2.798795
    17  C    3.717332   4.253318   2.409373   2.783889   1.376807
    18  H    2.693571   4.676552   2.164256   3.425740   1.080526
    19  C    4.241018   3.760407   2.816373   2.426831   2.433904
    20  H    4.597633   2.657060   3.407220   2.137582   3.881590
    21  H    5.323179   4.628559   3.898511   3.409967   3.408481
    22  Br   5.318553   6.170709   4.181697   4.701422   2.854661
    23  O    4.129364   1.238148   3.645624   2.366478   4.812340
    24  O    1.347288   4.236393   2.346024   3.654502   2.730551
    25  H    1.929439   4.721933   3.186637   4.384696   3.693812
                   16         17         18         19         20
    16  C    0.000000
    17  C    2.396277   0.000000
    18  H    3.879319   2.144322   0.000000
    19  C    1.382631   1.404161   3.414723   0.000000
    20  H    1.082883   3.386947   4.962113   2.145092   0.000000
    21  H    2.148977   2.164890   4.301653   1.082193   2.486475
    22  Br   4.159957   1.917615   2.965782   2.869158   5.014232
    23  O    2.813943   5.003485   5.765664   4.196242   2.478919
    24  O    4.780411   4.107047   2.389961   4.980397   5.738905
    25  H    5.605494   5.069735   3.314229   5.905487   6.511326
                   21         22         23         24         25
    21  H    0.000000
    22  Br   2.970128   0.000000
    23  O    4.855755   6.883741   0.000000
    24  O    6.033918   5.335455   5.474323   0.000000
    25  H    6.968693   6.275363   5.946697   0.964593   0.000000
 Stoichiometry    C14H8BrO2(2)
 Framework group  C1[X(C14H8BrO2)]
 Deg. of freedom    69
 Full point group                 C1      NOp   1
 RotChk:  IX=0 Diff= 1.21D-05
 Largest Abelian subgroup         C1      NOp   1
 Largest concise Abelian subgroup C1      NOp   1
                         Standard orientation:                         
 ---------------------------------------------------------------------
 Center     Atomic      Atomic             Coordinates (Angstroms)
 Number     Number       Type             X           Y           Z
 ---------------------------------------------------------------------
      1          6           0       -5.068698    0.090214    0.000214
      2          6           0       -4.031032    1.005621    0.000303
      3          6           0       -2.695355    0.584666    0.000246
      4          6           0       -2.396662   -0.809570    0.000190
      5          6           0       -3.476007   -1.727354   -0.000261
      6          6           0       -4.782923   -1.285011   -0.000177
      7          1           0       -6.097670    0.430591    0.000272
      8          1           0       -4.225217    2.071054    0.000334
      9          1           0       -3.303450   -2.798492   -0.001216
     10          1           0       -5.591680   -2.006743   -0.000564
     11          6           0       -1.034335   -1.229956    0.000540
     12          6           0       -1.628810    1.599484   -0.000105
     13          6           0        0.035134   -0.288695    0.000069
     14          6           0       -0.245528    1.103258   -0.000356
     15          6           0        1.381954   -0.723633    0.000207
     16          6           0        0.816025    2.017347   -0.000767
     17          6           0        2.391881    0.212127   -0.000231
     18          1           0        1.602168   -1.781481    0.000707
     19          6           0        2.131589    1.591952   -0.000759
     20          1           0        0.581251    3.074474   -0.001057
     21          1           0        2.945665    2.304989   -0.001101
     22         35           0        4.215838   -0.379842   -0.000036
     23          8           0       -1.883640    2.811125   -0.000140
     24          8           0       -0.668650   -2.526667    0.000637
     25          1           0       -1.430498   -3.118280    0.005238
 ---------------------------------------------------------------------
 Rotational constants (GHZ):      0.9830157      0.1774921      0.1503459
 Leave Link  202 at Thu Jan 09 23:09:59 2020, MaxMem=   134217728 cpu:         0.0
 (Enter E:\Gaussian\G09W\l301.exe)
 Standard basis: 6-311G(d) (5D, 7F)
 Ernie: Thresh=  0.10000D-02 Tol=  0.10000D-05 Strict=F.
 There are   375 symmetry adapted cartesian basis functions of A   symmetry.
 There are   356 symmetry adapted basis functions of A   symmetry.
   356 basis functions,   642 primitive gaussians,   375 cartesian basis functions
    72 alpha electrons       71 beta electrons
       nuclear repulsion energy      1393.0827818606 Hartrees.
 IExCor=  402 DFT=T Ex+Corr=B3LYP ExCW=0 ScaHFX=  0.200000
 ScaDFX=  0.800000  0.720000  1.000000  0.810000 ScalE2=  1.000000  1.000000
 IRadAn=      0 IRanWt=     -1 IRanGd=            0 ICorTp=0 IEmpDi=141
 NAtoms=   25 NActive=   25 NUniq=   25 SFac= 1.00D+00 NAtFMM=   60 NAOKFM=F Big=F
 Integral buffers will be    262144 words long.
 Raffenetti 2 integral format.
 Two-electron integral symmetry is turned on.
 R6Disp:  Grimme-D3(BJ) Dispersion energy=       -0.0633814131 Hartrees.
 Nuclear repulsion after empirical dispersion term =     1393.0194004474 Hartrees.
 ------------------------------------------------------------------------------
 Polarizable Continuum Model (PCM)
 =================================
 Model                : PCM (using non-symmetric T matrix).
 Atomic radii         : UFF (Universal Force Field).
 Polarization charges : Total charges.
 Charge compensation  : None.
 Solution method      : On-the-fly selection.
 Cavity type          : Scaled VdW (van der Waals Surface) (Alpha=1.100).
 Cavity algorithm     : GePol (No added spheres)
                        Default sphere list used, NSphG=   25.
                        Lebedev-Laikov grids with approx.  5.0 points / Ang**2.
                        Smoothing algorithm: Karplus/York (Gamma=1.0000).
                        Polarization charges: spherical gaussians, with
                                              point-specific exponents (IZeta= 3).
                        Self-potential: point-specific (ISelfS= 7).
                        Self-field    : sphere-specific E.n sum rule (ISelfD= 2).
 1st derivatives      : Analytical E(r).r(x)/FMM algorithm (CHGder, D1EAlg=3).
                        Cavity 1st derivative terms included.
 Solvent              : Acetonitrile, Eps=  35.688000 Eps(inf)=   1.806874
 ------------------------------------------------------------------------------
 GePol: Number of generator spheres                  =      25
 GePol: Total number of spheres                      =      25
 GePol: Number of exposed spheres                    =      25 (100.00%)
 GePol: Number of points                             =    2191
 GePol: Average weight of points                     =       0.13
 GePol: Minimum weight of points                     =   0.37D-09
 GePol: Maximum weight of points                     =    0.20577
 GePol: Number of points with low weight             =     137
 GePol: Fraction of low-weight points (<1% of avg)   =       6.25%
 GePol: Cavity surface area                          =    281.127 Ang**2
 GePol: Cavity volume                                =    308.173 Ang**3
 Leave Link  301 at Thu Jan 09 23:10:00 2020, MaxMem=   134217728 cpu:         1.0
 (Enter E:\Gaussian\G09W\l302.exe)
 NPDir=0 NMtPBC=     1 NCelOv=     1 NCel=       1 NClECP=     1 NCelD=      1
         NCelK=      1 NCelE2=     1 NClLst=     1 CellRange=     0.0.
 One-electron integrals computed using PRISM.
 NBasis=   356 RedAO= T EigKep=  8.58D-05  NBF=   356
 NBsUse=   356 1.00D-06 EigRej= -1.00D+00 NBFU=   356
 Precomputing XC quadrature grid using
 IXCGrd= 4 IRadAn=           0 IRanWt=          -1 IRanGd=           0 AccXCQ= 0.00D+00.
 Generated NRdTot=       0 NPtTot=           0 NUsed=           0 NTot=          16
 NSgBfM=   363   363   364   364   364 MxSgAt=    25 MxSgA2=    25.
 Leave Link  302 at Thu Jan 09 23:10:02 2020, MaxMem=   134217728 cpu:         2.0
 (Enter E:\Gaussian\G09W\l303.exe)
 DipDrv:  MaxL=1.
 Leave Link  303 at Thu Jan 09 23:10:02 2020, MaxMem=   134217728 cpu:         0.0
 (Enter E:\Gaussian\G09W\l401.exe)
 Initial guess from the checkpoint file:  "E:\Gaussian file\2-BrHAQ opt.chk"
 B after Tr=     0.000000    0.000000    0.000000
         Rot=    1.000000    0.000012    0.000000   -0.000004 Ang=   0.00 deg.
 Guess basis will be translated and rotated to current coordinates.
 JPrj=2 DoOrth=T DoCkMO=T.
 Initial guess <Sx>= 0.0000 <Sy>= 0.0000 <Sz>= 0.5000 <S**2>= 0.7729 S= 0.5114
 Leave Link  401 at Thu Jan 09 23:10:04 2020, MaxMem=   134217728 cpu:         2.0
 (Enter E:\Gaussian\G09W\l502.exe)
 UHF open shell SCF:
 Using DIIS extrapolation, IDIIS=  1040.
 Integral symmetry usage will be decided dynamically.
 IVT=      444890 IEndB=      444890 NGot=   134217728 MDV=   133930479
 LenX=   133930479 LenY=   133789413
 Requested convergence on RMS density matrix=1.00D-08 within 128 cycles.
 Requested convergence on MAX density matrix=1.00D-06.
 Requested convergence on             energy=1.00D-06.
 No special actions if energy rises.
 Fock matrices will be formed incrementally for  20 cycles.

 Cycle   1  Pass 1  IDiag  1:
 FoFJK:  IHMeth= 1 ICntrl=       0 DoSepK=F KAlg= 0 I1Cent=   0 FoldK=F
 IRaf= 780000000 NMat=   1 IRICut=       1 DoRegI=T DoRafI=F ISym2E= 0.
 FoFCou: FMM=F IPFlag=           0 FMFlag=      100000 FMFlg1=           0
         NFxFlg=           0 DoJE=F BraDBF=F KetDBF=F FulRan=T
         wScrn=  0.000000 ICntrl=       0 IOpCl=  1 I1Cent=           0 NGrid=           0
         NMat0=    1 NMatS0=      1 NMatT0=    0 NMatD0=    1 NMtDS0=    0 NMtDT0=    0
 Symmetry not used in FoFCou.
 Inv3:  Mode=1 IEnd=    14401443.
 Iteration    1 A*A^-1 deviation from unit magnitude is 2.22D-15 for    942.
 Iteration    1 A*A^-1 deviation from orthogonality  is 1.78D-15 for   1388   1179.
 Iteration    1 A^-1*A deviation from unit magnitude is 2.22D-15 for    606.
 Iteration    1 A^-1*A deviation from orthogonality  is 3.20D-13 for   1605   1571.
 E= -3263.12404398983    
 DIIS: error= 2.80D-05 at cycle   1 NSaved=   1.
 NSaved= 1 IEnMin= 1 EnMin= -3263.12404398983     IErMin= 1 ErrMin= 2.80D-05
 ErrMax= 2.80D-05  0.00D+00 EMaxC= 1.00D-01 BMatC= 5.76D-07 BMatP= 5.76D-07
 IDIUse=1 WtCom= 1.00D+00 WtEn= 0.00D+00
 Coeff-Com:  0.100D+01
 Coeff:      0.100D+01
 Gap=     0.728 Goal=   None    Shift=    0.000
 Gap=     0.797 Goal=   None    Shift=    0.000
 RMSDP=3.33D-06 MaxDP=1.75D-04              OVMax= 1.44D-04

 Cycle   2  Pass 1  IDiag  1:
 RMSU=  3.32D-06    CP:  1.00D+00
 E= -3263.12404418584     Delta-E=       -0.000000196017 Rises=F Damp=F
 DIIS: error= 3.41D-06 at cycle   2 NSaved=   2.
 NSaved= 2 IEnMin= 2 EnMin= -3263.12404418584     IErMin= 2 ErrMin= 3.41D-06
 ErrMax= 3.41D-06  0.00D+00 EMaxC= 1.00D-01 BMatC= 1.40D-08 BMatP= 5.76D-07
 IDIUse=1 WtCom= 1.00D+00 WtEn= 0.00D+00
 Coeff-Com: -0.284D-01 0.103D+01
 Coeff:     -0.284D-01 0.103D+01
 Gap=     0.112 Goal=   None    Shift=    0.000
 Gap=     0.133 Goal=   None    Shift=    0.000
 RMSDP=6.72D-07 MaxDP=2.86D-05 DE=-1.96D-07 OVMax= 4.06D-05

 Cycle   3  Pass 1  IDiag  1:
 RMSU=  6.58D-07    CP:  1.00D+00  9.99D-01
 E= -3263.12404418140     Delta-E=        0.000000004437 Rises=F Damp=F
 DIIS: error= 8.38D-06 at cycle   3 NSaved=   3.
 NSaved= 3 IEnMin= 2 EnMin= -3263.12404418584     IErMin= 2 ErrMin= 3.41D-06
 ErrMax= 8.38D-06  0.00D+00 EMaxC= 1.00D-01 BMatC= 4.68D-08 BMatP= 1.40D-08
 IDIUse=1 WtCom= 1.00D+00 WtEn= 0.00D+00
 Coeff-Com: -0.424D-01 0.694D+00 0.348D+00
 Coeff:     -0.424D-01 0.694D+00 0.348D+00
 Gap=     0.112 Goal=   None    Shift=    0.000
 Gap=     0.133 Goal=   None    Shift=    0.000
 RMSDP=5.58D-07 MaxDP=2.56D-05 DE= 4.44D-09 OVMax= 2.74D-05

 Cycle   4  Pass 1  IDiag  1:
 RMSU=  1.97D-07    CP:  1.00D+00  1.04D+00  2.67D-01
 E= -3263.12404419025     Delta-E=       -0.000000008845 Rises=F Damp=F
 DIIS: error= 8.00D-07 at cycle   4 NSaved=   4.
 NSaved= 4 IEnMin= 4 EnMin= -3263.12404419025     IErMin= 4 ErrMin= 8.00D-07
 ErrMax= 8.00D-07  0.00D+00 EMaxC= 1.00D-01 BMatC= 6.56D-10 BMatP= 1.40D-08
 IDIUse=1 WtCom= 1.00D+00 WtEn= 0.00D+00
 Coeff-Com: -0.153D-01 0.183D+00 0.143D+00 0.689D+00
 Coeff:     -0.153D-01 0.183D+00 0.143D+00 0.689D+00
 Gap=     0.112 Goal=   None    Shift=    0.000
 Gap=     0.133 Goal=   None    Shift=    0.000
 RMSDP=8.40D-08 MaxDP=3.45D-06 DE=-8.84D-09 OVMax= 6.38D-06

 Cycle   5  Pass 1  IDiag  1:
 RMSU=  4.76D-08    CP:  1.00D+00  1.04D+00  3.55D-01  8.65D-01
 E= -3263.12404419038     Delta-E=       -0.000000000128 Rises=F Damp=F
 DIIS: error= 4.79D-07 at cycle   5 NSaved=   5.
 NSaved= 5 IEnMin= 5 EnMin= -3263.12404419038     IErMin= 5 ErrMin= 4.79D-07
 ErrMax= 4.79D-07  0.00D+00 EMaxC= 1.00D-01 BMatC= 1.41D-10 BMatP= 6.56D-10
 IDIUse=1 WtCom= 1.00D+00 WtEn= 0.00D+00
 Coeff-Com: -0.339D-02 0.188D-01 0.390D-01 0.361D+00 0.585D+00
 Coeff:     -0.339D-02 0.188D-01 0.390D-01 0.361D+00 0.585D+00
 Gap=     0.112 Goal=   None    Shift=    0.000
 Gap=     0.133 Goal=   None    Shift=    0.000
 RMSDP=2.92D-08 MaxDP=1.00D-06 DE=-1.28D-10 OVMax= 2.43D-06

 Cycle   6  Pass 1  IDiag  1:
 RMSU=  2.23D-08    CP:  1.00D+00  1.04D+00  3.48D-01  9.19D-01  6.87D-01
 E= -3263.12404419049     Delta-E=       -0.000000000114 Rises=F Damp=F
 DIIS: error= 1.66D-07 at cycle   6 NSaved=   6.
 NSaved= 6 IEnMin= 6 EnMin= -3263.12404419049     IErMin= 6 ErrMin= 1.66D-07
 ErrMax= 1.66D-07  0.00D+00 EMaxC= 1.00D-01 BMatC= 2.23D-11 BMatP= 1.41D-10
 IDIUse=1 WtCom= 1.00D+00 WtEn= 0.00D+00
 Coeff-Com:  0.130D-02-0.252D-01-0.722D-02 0.453D-01 0.306D+00 0.680D+00
 Coeff:      0.130D-02-0.252D-01-0.722D-02 0.453D-01 0.306D+00 0.680D+00
 Gap=     0.112 Goal=   None    Shift=    0.000
 Gap=     0.133 Goal=   None    Shift=    0.000
 RMSDP=1.19D-08 MaxDP=4.17D-07 DE=-1.14D-10 OVMax= 2.22D-06

 Cycle   7  Pass 1  IDiag  1:
 RMSU=  7.40D-09    CP:  1.00D+00  1.04D+00  3.53D-01  9.30D-01  8.27D-01
                    CP:  7.62D-01
 E= -3263.12404419046     Delta-E=        0.000000000029 Rises=F Damp=F
 DIIS: error= 5.49D-08 at cycle   7 NSaved=   7.
 NSaved= 7 IEnMin= 6 EnMin= -3263.12404419049     IErMin= 7 ErrMin= 5.49D-08
 ErrMax= 5.49D-08  0.00D+00 EMaxC= 1.00D-01 BMatC= 2.66D-12 BMatP= 2.23D-11
 IDIUse=1 WtCom= 1.00D+00 WtEn= 0.00D+00
 Coeff-Com:  0.915D-03-0.135D-01-0.680D-02-0.785D-02 0.979D-01 0.327D+00
 Coeff-Com:  0.603D+00
 Coeff:      0.915D-03-0.135D-01-0.680D-02-0.785D-02 0.979D-01 0.327D+00
 Coeff:      0.603D+00
 Gap=     0.112 Goal=   None    Shift=    0.000
 Gap=     0.133 Goal=   None    Shift=    0.000
 RMSDP=3.46D-09 MaxDP=1.21D-07 DE= 2.91D-11 OVMax= 5.11D-07

 Error on total polarization charges =  0.01434
 SCF Done:  E(UB3LYP) =  -3263.12404419     A.U. after    7 cycles
            NFock=  7  Conv=0.35D-08     -V/T= 2.0017
 <Sx>= 0.0000 <Sy>= 0.0000 <Sz>= 0.5000 <S**2>= 0.7729 S= 0.5114
 <L.S>= 0.000000000000E+00
 KE= 3.257438211490D+03 PE=-1.054436630889D+04 EE= 2.630784652759D+03
 Annihilation of the first spin contaminant:
 S**2 before annihilation     0.7729,   after     0.7504
 Leave Link  502 at Thu Jan 09 23:19:34 2020, MaxMem=   134217728 cpu:       570.0
 (Enter E:\Gaussian\G09W\l701.exe)
 Compute integral first derivatives.
 ... and contract with generalized density number  0.
 R6Disp: Adding Grimme-D3(BJ) dispersion energy 1st derivatives to the gradient.
 D1PCM: PCM CHGder 1st derivatives, ID1Alg=3 FixD1E=F DoIter=F DoCFld=F I1PDM=0.
 GePol: Maximum number of non-zero 1st derivatives   =     349
 Leave Link  701 at Thu Jan 09 23:19:56 2020, MaxMem=   134217728 cpu:        21.0
 (Enter E:\Gaussian\G09W\l702.exe)
 L702 exits ... SP integral derivatives will be done elsewhere.
 Leave Link  702 at Thu Jan 09 23:19:56 2020, MaxMem=   134217728 cpu:         0.0
 (Enter E:\Gaussian\G09W\l703.exe)
 Compute integral first derivatives, UseDBF=F ICtDFT=           0.
 Integral derivatives from FoFJK, PRISM(SPDF).
 Calling FoFJK, ICntrl=      2127 FMM=F ISym2X=0 I1Cent= 0 IOpClX= 1 NMat=1 NMatS=1 NMatT=0.
 FoFJK:  IHMeth= 1 ICntrl=    2127 DoSepK=F KAlg= 0 I1Cent=   0 FoldK=F
 IRaf=         0 NMat=   1 IRICut=       1 DoRegI=T DoRafI=F ISym2E= 0.
 FoFCou: FMM=F IPFlag=           0 FMFlag=      100000 FMFlg1=         800
         NFxFlg=           0 DoJE=F BraDBF=F KetDBF=F FulRan=T
         wScrn=  0.000000 ICntrl=    2127 IOpCl=  1 I1Cent=           0 NGrid=           0
         NMat0=    1 NMatS0=      1 NMatT0=    0 NMatD0=    1 NMtDS0=    0 NMtDT0=    0
 Symmetry not used in FoFCou.
 Leave Link  703 at Thu Jan 09 23:23:42 2020, MaxMem=   134217728 cpu:       225.0
 (Enter E:\Gaussian\G09W\l716.exe)
 Dipole        =-1.29541461D+00-2.20565116D+00 3.42057139D-03
 ***** Axes restored to original set *****
 -------------------------------------------------------------------
 Center     Atomic                   Forces (Hartrees/Bohr)
 Number     Number              X              Y              Z
 -------------------------------------------------------------------
      1        6          -0.000003215   -0.000010012   -0.000000973
      2        6          -0.000016203   -0.000004495   -0.000000208
      3        6          -0.000005841    0.000021375    0.000006062
      4        6           0.000000809   -0.000010897   -0.000012371
      5        6          -0.000010090   -0.000010070    0.000003677
      6        6          -0.000001326   -0.000012198    0.000000437
      7        1           0.000000706   -0.000012011   -0.000000269
      8        1           0.000017990   -0.000013607   -0.000000664
      9        1          -0.000010554   -0.000004723   -0.000005784
     10        1          -0.000007089   -0.000011691    0.000000265
     11        6           0.000009731    0.000023071    0.000018964
     12        6          -0.000015341   -0.000093569   -0.000015194
     13        6          -0.000003510    0.000000084    0.000005093
     14        6           0.000018419    0.000022103    0.000002275
     15        6          -0.000009000    0.000011068    0.000000293
     16        6           0.000026059    0.000006338   -0.000000003
     17        6          -0.000003134    0.000004580    0.000000064
     18        1          -0.000003614    0.000010291    0.000001272
     19        6           0.000003392    0.000004466    0.000000527
     20        1          -0.000005691    0.000005530   -0.000000047
     21        1           0.000010630    0.000016559   -0.000000474
     22       35           0.000002136    0.000016732    0.000000700
     23        8           0.000018031    0.000050639    0.000005193
     24        8          -0.000008080   -0.000010463   -0.000035522
     25        1          -0.000005214    0.000000900    0.000026687
 -------------------------------------------------------------------
 Cartesian Forces:  Max     0.000093569 RMS     0.000016567
 Leave Link  716 at Thu Jan 09 23:23:43 2020, MaxMem=   134217728 cpu:         0.0
 (Enter E:\Gaussian\G09W\l103.exe)

 GradGradGradGradGradGradGradGradGradGradGradGradGradGradGradGradGradGrad
 Berny optimization.
 Using GEDIIS/GDIIS optimizer.
 FormGI is forming the generalized inverse of G from B-inverse, IUseBI=4.
 Internal  Forces:  Max     0.000053258 RMS     0.000007417
 Search for a local minimum.
 Step number   6 out of a maximum of  146
 All quantities printed in internal units (Hartrees-Bohrs-Radians)
 RMS Force = .74167D-05 SwitMx=.10000D-02 MixMth= 2
 Mixed Optimization -- En-DIIS/RFO-DIIS
 Swapping is turned off.
 Update second derivatives using D2CorX and points    1    2    3    4    5
                                                      6
 DE= -1.19D-07 DEPred=-6.84D-08 R= 1.75D+00
 Trust test= 1.75D+00 RLast= 1.87D-03 DXMaxT set to 1.50D-01
 ITU=  0  1 -1  1  1  0
     Eigenvalues ---    0.00579   0.01258   0.01624   0.01692   0.01722
     Eigenvalues ---    0.01761   0.01819   0.01857   0.01872   0.02050
     Eigenvalues ---    0.02070   0.02088   0.02102   0.02132   0.02153
     Eigenvalues ---    0.02169   0.02184   0.02188   0.02201   0.02233
     Eigenvalues ---    0.02260   0.04231   0.13180   0.15995   0.16000
     Eigenvalues ---    0.16000   0.16000   0.16007   0.16131   0.16904
     Eigenvalues ---    0.17883   0.21600   0.22266   0.22750   0.23540
     Eigenvalues ---    0.24077   0.24636   0.24741   0.24998   0.25000
     Eigenvalues ---    0.25001   0.25417   0.29050   0.32952   0.34688
     Eigenvalues ---    0.35435   0.35480   0.35524   0.35598   0.35690
     Eigenvalues ---    0.35696   0.35937   0.37652   0.39751   0.40838
     Eigenvalues ---    0.41029   0.41598   0.43312   0.43691   0.44441
     Eigenvalues ---    0.44811   0.45830   0.47221   0.47343   0.48565
     Eigenvalues ---    0.52034   0.54505   0.57610   0.78924
 En-DIIS/RFO-DIIS IScMMF=        0 using points:     6    5    4    3    2
 RFO step:  Lambda=-2.63026062D-08.
 NNeg= 0 NP= 5 Switch=  2.50D-03 Rises=F DC=  4.55D-06 SmlDif=  1.00D-05
 RMS Error=  0.3902183803D-04 NUsed= 5 EDIIS=F
 DidBck=F Rises=F RFO-DIIS coefs:    2.44293   -1.24468   -0.08055   -0.13595    0.01825
 Iteration  1 RMS(Cart)=  0.00062543 RMS(Int)=  0.00000096
 Iteration  2 RMS(Cart)=  0.00000099 RMS(Int)=  0.00000004
 ITry= 1 IFail=0 DXMaxC= 5.89D-03 DCOld= 1.00D+10 DXMaxT= 1.50D-01 DXLimC= 3.00D+00 Rises=F
 Variable       Old X    -DE/DX   Delta X   Delta X   Delta X     New X
                                 (Linear)    (Quad)   (Total)
    R1        2.61488   0.00000  -0.00004   0.00002  -0.00001   2.61487
    R2        2.65432   0.00000   0.00004  -0.00003   0.00002   2.65433
    R3        2.04810   0.00000  -0.00001   0.00001   0.00000   2.04810
    R4        2.64645  -0.00001  -0.00006   0.00001  -0.00005   2.64641
    R5        2.04654   0.00000   0.00003  -0.00003  -0.00001   2.04654
    R6        2.69451   0.00000  -0.00006   0.00001  -0.00005   2.69445
    R7        2.78206  -0.00002  -0.00004  -0.00005  -0.00009   2.78197
    R8        2.67736  -0.00001   0.00000   0.00000   0.00000   2.67736
    R9        2.69421  -0.00002   0.00000  -0.00004  -0.00004   2.69417
   R10        2.60734   0.00000  -0.00003   0.00000  -0.00002   2.60732
   R11        2.05025   0.00000  -0.00001   0.00000  -0.00001   2.05024
   R12        2.04840   0.00000   0.00000  -0.00001  -0.00001   2.04840
   R13        2.69227   0.00000  -0.00010   0.00008  -0.00002   2.69225
   R14        2.54601   0.00001  -0.00003   0.00006   0.00003   2.54603
   R15        2.77713  -0.00002  -0.00001  -0.00007  -0.00008   2.77705
   R16        2.33976   0.00005  -0.00002   0.00008   0.00006   2.33982
   R17        2.68335   0.00000  -0.00007   0.00003  -0.00004   2.68331
   R18        2.67454   0.00000   0.00001   0.00003   0.00004   2.67458
   R19        2.64727   0.00000  -0.00004   0.00001  -0.00003   2.64725
   R20        2.60179  -0.00001  -0.00007   0.00002  -0.00005   2.60174
   R21        2.04190   0.00000   0.00002  -0.00002  -0.00001   2.04189
   R22        2.61279   0.00000  -0.00004   0.00003  -0.00001   2.61278
   R23        2.04635   0.00000   0.00002  -0.00003  -0.00001   2.04634
   R24        2.65348   0.00000   0.00003  -0.00001   0.00002   2.65350
   R25        3.62377   0.00000  -0.00010   0.00007  -0.00003   3.62374
   R26        2.04505   0.00000   0.00000   0.00000   0.00000   2.04505
   R27        1.82282   0.00000   0.00000   0.00001   0.00001   1.82283
    A1        2.08879   0.00001   0.00004   0.00001   0.00006   2.08885
    A2        2.09925   0.00000  -0.00003   0.00000  -0.00003   2.09921
    A3        2.09515   0.00000  -0.00001  -0.00001  -0.00002   2.09513
    A4        2.11340   0.00000  -0.00007   0.00003  -0.00004   2.11336
    A5        2.11340  -0.00001  -0.00011  -0.00007  -0.00018   2.11321
    A6        2.05639   0.00001   0.00019   0.00004   0.00022   2.05661
    A7        2.08715  -0.00001   0.00006  -0.00007  -0.00001   2.08714
    A8        2.07573   0.00001  -0.00006   0.00009   0.00003   2.07576
    A9        2.12030   0.00000   0.00000  -0.00002  -0.00002   2.12028
   A10        2.06443   0.00001   0.00002   0.00004   0.00006   2.06449
   A11        2.08115   0.00000  -0.00001  -0.00001  -0.00002   2.08113
   A12        2.13761  -0.00001  -0.00002  -0.00003  -0.00004   2.13756
   A13        2.11055   0.00000  -0.00005   0.00001  -0.00004   2.11051
   A14        2.11575   0.00000   0.00005  -0.00003   0.00002   2.11577
   A15        2.05688   0.00001   0.00001   0.00002   0.00002   2.05691
   A16        2.10204   0.00000   0.00000  -0.00003  -0.00003   2.10201
   A17        2.09451   0.00000   0.00003   0.00000   0.00003   2.09453
   A18        2.08663   0.00000  -0.00003   0.00003   0.00001   2.08664
   A19        2.12056   0.00000   0.00002   0.00002   0.00003   2.12059
   A20        2.14498  -0.00001   0.00012  -0.00015  -0.00003   2.14495
   A21        2.01765   0.00001  -0.00014   0.00013  -0.00001   2.01764
   A22        2.03661   0.00001  -0.00001   0.00007   0.00005   2.03666
   A23        2.12405   0.00000  -0.00001  -0.00002  -0.00003   2.12402
   A24        2.12252  -0.00001   0.00002  -0.00005  -0.00003   2.12250
   A25        2.09355  -0.00001  -0.00001  -0.00003  -0.00004   2.09352
   A26        2.10751   0.00000  -0.00001   0.00004   0.00003   2.10753
   A27        2.08213   0.00000   0.00002  -0.00001   0.00001   2.08214
   A28        2.11419   0.00000   0.00002  -0.00003  -0.00001   2.11418
   A29        2.08627   0.00001  -0.00007   0.00006  -0.00001   2.08626
   A30        2.08273   0.00000   0.00005  -0.00003   0.00002   2.08275
   A31        2.08193   0.00000  -0.00006   0.00005  -0.00002   2.08191
   A32        2.08840   0.00000   0.00004  -0.00003   0.00000   2.08840
   A33        2.11285   0.00000   0.00003  -0.00001   0.00001   2.11287
   A34        2.11795   0.00000  -0.00005   0.00002  -0.00004   2.11792
   A35        2.06315   0.00002   0.00018   0.00005   0.00023   2.06338
   A36        2.10208  -0.00001  -0.00012  -0.00007  -0.00020   2.10189
   A37        2.13164   0.00000   0.00004  -0.00005  -0.00001   2.13163
   A38        2.08047   0.00000  -0.00005   0.00004   0.00000   2.08047
   A39        2.07107   0.00000   0.00000   0.00001   0.00001   2.07109
   A40        2.06999   0.00001   0.00000   0.00003   0.00003   2.07002
   A41        2.10952  -0.00001  -0.00008  -0.00002  -0.00010   2.10941
   A42        2.10368   0.00000   0.00007   0.00000   0.00007   2.10375
   A43        1.95620  -0.00001  -0.00015   0.00011  -0.00005   1.95615
    D1       -0.00020   0.00000   0.00008   0.00006   0.00014  -0.00006
    D2        3.14130   0.00000   0.00011   0.00009   0.00020   3.14150
    D3        3.14158   0.00000  -0.00001   0.00000   0.00000   3.14158
    D4       -0.00011   0.00000   0.00002   0.00003   0.00006  -0.00005
    D5        0.00018   0.00000  -0.00007  -0.00005  -0.00012   0.00005
    D6       -3.14126   0.00000  -0.00013  -0.00010  -0.00023  -3.14149
    D7        3.14159   0.00000   0.00002   0.00000   0.00002  -3.14158
    D8        0.00015   0.00000  -0.00004  -0.00005  -0.00009   0.00006
    D9       -0.00008   0.00000   0.00004   0.00002   0.00006  -0.00002
   D10        3.14124   0.00000   0.00018   0.00009   0.00027   3.14151
   D11       -3.14158   0.00000   0.00001  -0.00001   0.00000  -3.14158
   D12       -0.00026   0.00000   0.00015   0.00006   0.00021  -0.00005
   D13        0.00036   0.00000  -0.00016  -0.00010  -0.00026   0.00010
   D14       -3.14126   0.00000  -0.00014  -0.00010  -0.00024  -3.14150
   D15       -3.14095   0.00000  -0.00031  -0.00017  -0.00048  -3.14143
   D16        0.00061   0.00000  -0.00028  -0.00018  -0.00046   0.00015
   D17       -3.14144   0.00000  -0.00003  -0.00006  -0.00009  -3.14152
   D18        0.00020   0.00000  -0.00016  -0.00003  -0.00019   0.00001
   D19       -0.00012   0.00000   0.00011   0.00002   0.00013   0.00001
   D20        3.14152   0.00000  -0.00002   0.00004   0.00003   3.14154
   D21       -0.00039   0.00000   0.00018   0.00010   0.00028  -0.00011
   D22        3.14063   0.00000   0.00041   0.00028   0.00069   3.14132
   D23        3.14124   0.00000   0.00015   0.00011   0.00026   3.14150
   D24       -0.00093   0.00000   0.00038   0.00028   0.00066  -0.00026
   D25       -0.00072   0.00000   0.00030   0.00022   0.00052  -0.00020
   D26        3.14148   0.00000   0.00004   0.00004   0.00007   3.14156
   D27        3.14083   0.00000   0.00032   0.00022   0.00054   3.14137
   D28       -0.00015   0.00000   0.00007   0.00003   0.00009  -0.00005
   D29        0.00012   0.00000  -0.00006  -0.00003  -0.00009   0.00003
   D30        3.14156   0.00000   0.00000   0.00002   0.00002   3.14158
   D31       -3.14092   0.00000  -0.00029  -0.00020  -0.00048  -3.14140
   D32        0.00052   0.00000  -0.00022  -0.00015  -0.00037   0.00015
   D33        0.00034   0.00000  -0.00014  -0.00010  -0.00024   0.00009
   D34       -3.14141   0.00000  -0.00005  -0.00006  -0.00011  -3.14153
   D35        3.14136   0.00000   0.00010   0.00007   0.00017   3.14153
   D36       -0.00039   0.00000   0.00019   0.00011   0.00030  -0.00009
   D37       -0.00536   0.00002   0.00232   0.00168   0.00400  -0.00137
   D38        3.13681   0.00002   0.00208   0.00150   0.00358   3.14038
   D39       -0.00027   0.00000   0.00005   0.00010   0.00015  -0.00012
   D40        3.14153   0.00000  -0.00003   0.00004   0.00000   3.14154
   D41        3.14128   0.00000   0.00018   0.00008   0.00025   3.14153
   D42       -0.00010   0.00000   0.00010   0.00001   0.00011   0.00000
   D43        0.00017   0.00000  -0.00004  -0.00006  -0.00010   0.00007
   D44        3.14155   0.00000   0.00004   0.00000   0.00005  -3.14158
   D45       -3.14127   0.00000  -0.00012  -0.00011  -0.00023  -3.14149
   D46        0.00011   0.00000  -0.00004  -0.00004  -0.00008   0.00003
   D47       -3.14157   0.00000  -0.00004   0.00000  -0.00004   3.14158
   D48       -0.00003   0.00000   0.00000   0.00001   0.00001  -0.00002
   D49       -0.00013   0.00000   0.00005   0.00004   0.00009  -0.00004
   D50        3.14141   0.00000   0.00008   0.00006   0.00014   3.14154
   D51        3.14138   0.00000   0.00008   0.00007   0.00015   3.14153
   D52       -0.00018   0.00000   0.00005   0.00006   0.00011  -0.00006
   D53       -0.00001   0.00000   0.00000   0.00000   0.00001   0.00000
   D54       -3.14156   0.00000  -0.00003   0.00000  -0.00003  -3.14159
   D55        0.00005   0.00000  -0.00002  -0.00001  -0.00003   0.00001
   D56        3.14159   0.00000   0.00001   0.00000   0.00001  -3.14159
   D57       -3.14149   0.00000  -0.00005  -0.00003  -0.00008  -3.14157
   D58        0.00005   0.00000  -0.00003  -0.00001  -0.00004   0.00001
   D59       -0.00008   0.00000   0.00003   0.00003   0.00005  -0.00002
   D60        3.14157   0.00000   0.00002   0.00001   0.00003  -3.14159
   D61        3.14147   0.00000   0.00006   0.00003   0.00009   3.14157
   D62       -0.00006   0.00000   0.00005   0.00001   0.00006   0.00000
   D63        0.00006   0.00000  -0.00002  -0.00002  -0.00004   0.00002
   D64       -3.14159   0.00000  -0.00001   0.00000  -0.00001   3.14158
   D65       -3.14148   0.00000  -0.00005  -0.00003  -0.00008  -3.14156
   D66        0.00005   0.00000  -0.00004  -0.00001  -0.00005   0.00000
         Item               Value     Threshold  Converged?
 Maximum Force            0.000053     0.000450     YES
 RMS     Force            0.000007     0.000300     YES
 Maximum Displacement     0.005890     0.001800     NO 
 RMS     Displacement     0.000625     0.001200     YES
 Predicted change in Energy=-1.034450D-07
 Lowest energy point so far.  Saving SCF results.
 GradGradGradGradGradGradGradGradGradGradGradGradGradGradGradGradGradGrad

 Leave Link  103 at Thu Jan 09 23:23:44 2020, MaxMem=   134217728 cpu:         1.0
 (Enter E:\Gaussian\G09W\l202.exe)
                          Input orientation:                          
 ---------------------------------------------------------------------
 Center     Atomic      Atomic             Coordinates (Angstroms)
 Number     Number       Type             X           Y           Z
 ---------------------------------------------------------------------
      1          6           0       -3.745220    0.642818    0.000775
      2          6           0       -4.782364    1.558809    0.000944
      3          6           0       -6.118239    1.138564    0.000859
      4          6           0       -6.417651   -0.255489    0.000569
      5          6           0       -5.338844   -1.173902    0.000505
      6          6           0       -4.031700   -0.732270    0.000587
      7          1           0       -2.716070    0.982647    0.000828
      8          1           0       -4.587379    2.624092    0.001176
      9          1           0       -5.512005   -2.244935    0.000546
     10          1           0       -3.223332   -1.454434    0.000551
     11          6           0       -7.780187   -0.675133    0.000374
     12          6           0       -7.184241    2.153885    0.001150
     13          6           0       -8.849170    0.266662    0.000707
     14          6           0       -8.567757    1.658442    0.001135
     15          6           0      -10.196240   -0.167565    0.000588
     16          6           0       -9.628783    2.573121    0.001470
     17          6           0      -11.205634    0.768733    0.000936
     18          1           0      -10.417020   -1.225289    0.000218
     19          6           0      -10.944567    2.148422    0.001392
     20          1           0       -9.393658    3.630164    0.001792
     21          1           0      -11.758192    2.861972    0.001651
     22         35           0      -13.029899    0.177768    0.000779
     23          8           0       -6.928766    3.365421    0.001455
     24          8           0       -8.146540   -1.971671    0.000055
     25          1           0       -7.384952   -2.563647   -0.001242
 ---------------------------------------------------------------------
                    Distance matrix (angstroms):
                    1          2          3          4          5
     1  C    0.000000
     2  C    1.383729   0.000000
     3  C    2.424249   1.400417   0.000000
     4  C    2.819369   2.442507   1.425844   0.000000
     5  C    2.416632   2.788796   2.440278   1.416795   0.000000
     6  C    1.404613   2.410921   2.802439   2.433122   1.379733
     7  H    1.083805   2.145118   3.405740   3.903163   3.395533
     8  H    2.152830   1.082980   2.133149   3.412020   3.871622
     9  H    3.385358   3.873093   3.437381   2.185885   1.084941
    10  H    2.161211   3.392670   3.886402   3.411912   2.134031
    11  C    4.244755   3.738642   2.459993   1.425694   2.491772
    12  C    3.756353   2.474496   1.472154   2.528387   3.805215
    13  C    5.117792   4.267148   2.866740   2.486951   3.794419
    14  C    4.928321   3.786704   2.504079   2.878556   4.295120
    15  C    6.501721   5.682466   4.282063   3.779612   4.960546
    16  C    6.192123   4.951425   3.792344   4.279299   5.695943
    17  C    7.461476   6.471678   5.100820   4.896305   6.180053
    18  H    6.928400   6.284946   4.905845   4.115271   5.078436
    19  C    7.355096   6.190346   4.930847   5.125598   6.516285
    20  H    6.389765   5.055151   4.115391   4.894376   6.286540
    21  H    8.314587   7.096507   5.897389   6.183844   7.582632
    22  Br   9.296318   8.362363   6.978121   6.626427   7.808927
    23  O    4.188977   2.805511   2.369778   3.656806   4.809710
    24  O    5.119294   4.876677   3.713162   2.436050   2.918834
    25  H    4.850677   4.875256   3.912919   2.502652   2.473450
                    6          7          8          9         10
     6  C    0.000000
     7  H    2.161440   0.000000
     8  H    3.402050   2.489204   0.000000
     9  H    2.116473   4.270192   4.956043   0.000000
    10  H    1.083964   2.489313   4.300581   2.421346   0.000000
    11  C    3.748922   5.328556   4.591177   2.758428   4.623011
    12  C    4.274156   4.619129   2.639089   4.705953   5.358056
    13  C    4.919947   6.174751   4.870353   4.176696   5.883215
    14  C    5.127506   5.890580   4.095838   4.957214   6.184890
    15  C    6.190351   7.568086   6.265195   5.124210   7.090661
    16  C    6.500227   7.093322   5.041662   6.337312   7.566439
    17  C    7.329279   8.492258   6.873402   6.442019   8.286109
    18  H    6.404325   8.011218   6.985875   5.009875   7.197336
    19  C    7.489066   8.310667   6.374959   6.986724   8.520448
    20  H    6.912412   7.183281   4.910448   7.041593   7.995378
    21  H    8.521575   9.235357   7.174757   8.068169   9.564266
    22  Br   9.044101  10.345187   8.789804   7.898622   9.941471
    23  O    5.018373   4.839878   2.455944   5.786477   6.079576
    24  O    4.297444   6.182071   5.812802   2.648669   4.950304
    25  H    3.820765   5.862991   5.893985   1.899871   4.306906
                   11         12         13         14         15
    11  C    0.000000
    12  C    2.891106   0.000000
    13  C    1.424676   2.516664   0.000000
    14  C    2.462893   1.469550   1.419945   0.000000
    15  C    2.468793   3.802797   1.415327   2.446683   0.000000
    16  C    3.737441   2.480231   2.434656   1.400862   2.798815
    17  C    3.717316   4.253262   2.409356   2.783878   1.376782
    18  H    2.693615   4.676502   2.164272   3.425738   1.080521
    19  C    4.240963   3.760329   2.816329   2.426789   2.433883
    20  H    4.597704   2.657240   3.407289   2.137710   3.881609
    21  H    5.323123   4.628435   3.898467   3.409891   3.408487
    22  Br   5.318545   6.170636   4.181674   4.701394   2.854624
    23  O    4.129286   1.238180   3.645581   2.366447   4.812315
    24  O    1.347303   4.236299   2.346023   3.654470   2.730581
    25  H    1.929429   4.721800   3.186626   4.384640   3.693854
                   16         17         18         19         20
    16  C    0.000000
    17  C    2.396304   0.000000
    18  H    3.879335   2.144304   0.000000
    19  C    1.382626   1.404172   3.414709   0.000000
    20  H    1.082878   3.386893   4.962127   2.144966   0.000000
    21  H    2.148910   2.164941   4.301680   1.082192   2.486189
    22  Br   4.159964   1.917598   2.965756   2.869162   5.014109
    23  O    2.813865   5.003438   5.765634   4.196158   2.479069
    24  O    4.780396   4.107052   2.390014   4.980374   5.738978
    25  H    5.605459   5.069751   3.314308   5.905460   6.511391
                   21         22         23         24         25
    21  H    0.000000
    22  Br   2.970217   0.000000
    23  O    4.855596   6.883674   0.000000
    24  O    6.033916   5.335475   5.474261   0.000000
    25  H    6.968685   6.275411   5.946593   0.964600   0.000000
 Stoichiometry    C14H8BrO2(2)
 Framework group  C1[X(C14H8BrO2)]
 Deg. of freedom    69
 Full point group                 C1      NOp   1
 RotChk:  IX=0 Diff= 3.82D-04
 Largest Abelian subgroup         C1      NOp   1
 Largest concise Abelian subgroup C1      NOp   1
                         Standard orientation:                         
 ---------------------------------------------------------------------
 Center     Atomic      Atomic             Coordinates (Angstroms)
 Number     Number       Type             X           Y           Z
 ---------------------------------------------------------------------
      1          6           0       -5.068614    0.090220    0.000000
      2          6           0       -4.030975    1.005651    0.000091
      3          6           0       -2.695327    0.584684    0.000080
      4          6           0       -2.396668   -0.809530   -0.000001
      5          6           0       -3.475972   -1.727361   -0.000199
      6          6           0       -4.782877   -1.285023   -0.000179
      7          1           0       -6.097580    0.430605    0.000026
      8          1           0       -4.225385    2.071039    0.000145
      9          1           0       -3.303389   -2.798487   -0.000526
     10          1           0       -5.591634   -2.006749   -0.000348
     11          6           0       -1.034360   -1.229911    0.000098
     12          6           0       -1.628777    1.599429    0.000077
     13          6           0        0.035132   -0.288693    0.000032
     14          6           0       -0.245529    1.103239   -0.000024
     15          6           0        1.381968   -0.723647    0.000052
     16          6           0        0.815991    2.017344   -0.000099
     17          6           0        2.391867    0.212105   -0.000030
     18          1           0        1.602176   -1.781491    0.000139
     19          6           0        2.131545    1.591935   -0.000118
     20          1           0        0.581437    3.074515   -0.000139
     21          1           0        2.945555    2.305045   -0.000174
     22         35           0        4.215813   -0.379845   -0.000010
     23          8           0       -1.883598    2.811104    0.000095
     24          8           0       -0.668707   -2.526647    0.000072
     25          1           0       -1.430614   -3.118211    0.001199
 ---------------------------------------------------------------------
 Rotational constants (GHZ):      0.9830293      0.1774951      0.1503483
 Leave Link  202 at Thu Jan 09 23:23:44 2020, MaxMem=   134217728 cpu:         0.0
 (Enter E:\Gaussian\G09W\l301.exe)
 Standard basis: 6-311G(d) (5D, 7F)
 Ernie: Thresh=  0.10000D-02 Tol=  0.10000D-05 Strict=F.
 There are   375 symmetry adapted cartesian basis functions of A   symmetry.
 There are   356 symmetry adapted basis functions of A   symmetry.
   356 basis functions,   642 primitive gaussians,   375 cartesian basis functions
    72 alpha electrons       71 beta electrons
       nuclear repulsion energy      1393.0931907346 Hartrees.
 IExCor=  402 DFT=T Ex+Corr=B3LYP ExCW=0 ScaHFX=  0.200000
 ScaDFX=  0.800000  0.720000  1.000000  0.810000 ScalE2=  1.000000  1.000000
 IRadAn=      0 IRanWt=     -1 IRanGd=            0 ICorTp=0 IEmpDi=141
 NAtoms=   25 NActive=   25 NUniq=   25 SFac= 1.00D+00 NAtFMM=   60 NAOKFM=F Big=F
 Integral buffers will be    262144 words long.
 Raffenetti 2 integral format.
 Two-electron integral symmetry is turned on.
 R6Disp:  Grimme-D3(BJ) Dispersion energy=       -0.0633818290 Hartrees.
 Nuclear repulsion after empirical dispersion term =     1393.0298089056 Hartrees.
 ------------------------------------------------------------------------------
 Polarizable Continuum Model (PCM)
 =================================
 Model                : PCM (using non-symmetric T matrix).
 Atomic radii         : UFF (Universal Force Field).
 Polarization charges : Total charges.
 Charge compensation  : None.
 Solution method      : On-the-fly selection.
 Cavity type          : Scaled VdW (van der Waals Surface) (Alpha=1.100).
 Cavity algorithm     : GePol (No added spheres)
                        Default sphere list used, NSphG=   25.
                        Lebedev-Laikov grids with approx.  5.0 points / Ang**2.
                        Smoothing algorithm: Karplus/York (Gamma=1.0000).
                        Polarization charges: spherical gaussians, with
                                              point-specific exponents (IZeta= 3).
                        Self-potential: point-specific (ISelfS= 7).
                        Self-field    : sphere-specific E.n sum rule (ISelfD= 2).
 1st derivatives      : Analytical E(r).r(x)/FMM algorithm (CHGder, D1EAlg=3).
                        Cavity 1st derivative terms included.
 Solvent              : Acetonitrile, Eps=  35.688000 Eps(inf)=   1.806874
 ------------------------------------------------------------------------------
 GePol: Number of generator spheres                  =      25
 GePol: Total number of spheres                      =      25
 GePol: Number of exposed spheres                    =      25 (100.00%)
 GePol: Number of points                             =    2193
 GePol: Average weight of points                     =       0.13
 GePol: Minimum weight of points                     =   0.23D-10
 GePol: Maximum weight of points                     =    0.20577
 GePol: Number of points with low weight             =     138
 GePol: Fraction of low-weight points (<1% of avg)   =       6.29%
 GePol: Cavity surface area                          =    281.126 Ang**2
 GePol: Cavity volume                                =    308.171 Ang**3
 Leave Link  301 at Thu Jan 09 23:23:45 2020, MaxMem=   134217728 cpu:         0.0
 (Enter E:\Gaussian\G09W\l302.exe)
 NPDir=0 NMtPBC=     1 NCelOv=     1 NCel=       1 NClECP=     1 NCelD=      1
         NCelK=      1 NCelE2=     1 NClLst=     1 CellRange=     0.0.
 One-electron integrals computed using PRISM.
 NBasis=   356 RedAO= T EigKep=  8.58D-05  NBF=   356
 NBsUse=   356 1.00D-06 EigRej= -1.00D+00 NBFU=   356
 Precomputing XC quadrature grid using
 IXCGrd= 4 IRadAn=           0 IRanWt=          -1 IRanGd=           0 AccXCQ= 0.00D+00.
 Generated NRdTot=       0 NPtTot=           0 NUsed=           0 NTot=          16
 NSgBfM=   363   363   364   364   364 MxSgAt=    25 MxSgA2=    25.
 Leave Link  302 at Thu Jan 09 23:23:49 2020, MaxMem=   134217728 cpu:         4.0
 (Enter E:\Gaussian\G09W\l303.exe)
 DipDrv:  MaxL=1.
 Leave Link  303 at Thu Jan 09 23:23:50 2020, MaxMem=   134217728 cpu:         1.0
 (Enter E:\Gaussian\G09W\l401.exe)
 Initial guess from the checkpoint file:  "E:\Gaussian file\2-BrHAQ opt.chk"
 B after Tr=     0.000000    0.000000    0.000000
         Rot=    1.000000   -0.000095    0.000014    0.000001 Ang=  -0.01 deg.
 Guess basis will be translated and rotated to current coordinates.
 JPrj=2 DoOrth=T DoCkMO=T.
 Initial guess <Sx>= 0.0000 <Sy>= 0.0000 <Sz>= 0.5000 <S**2>= 0.7729 S= 0.5114
 Leave Link  401 at Thu Jan 09 23:23:55 2020, MaxMem=   134217728 cpu:         5.0
 (Enter E:\Gaussian\G09W\l502.exe)
 UHF open shell SCF:
 Using DIIS extrapolation, IDIIS=  1040.
 Integral symmetry usage will be decided dynamically.
 IVT=      444890 IEndB=      444890 NGot=   134217728 MDV=   133930479
 LenX=   133930479 LenY=   133789413
 Requested convergence on RMS density matrix=1.00D-08 within 128 cycles.
 Requested convergence on MAX density matrix=1.00D-06.
 Requested convergence on             energy=1.00D-06.
 No special actions if energy rises.
 Fock matrices will be formed incrementally for  20 cycles.

 Cycle   1  Pass 1  IDiag  1:
 FoFJK:  IHMeth= 1 ICntrl=       0 DoSepK=F KAlg= 0 I1Cent=   0 FoldK=F
 IRaf= 780000000 NMat=   1 IRICut=       1 DoRegI=T DoRafI=F ISym2E= 0.
 FoFCou: FMM=F IPFlag=           0 FMFlag=      100000 FMFlg1=           0
         NFxFlg=           0 DoJE=F BraDBF=F KetDBF=F FulRan=T
         wScrn=  0.000000 ICntrl=       0 IOpCl=  1 I1Cent=           0 NGrid=           0
         NMat0=    1 NMatS0=      1 NMatT0=    0 NMatD0=    1 NMtDS0=    0 NMtDT0=    0
 Symmetry not used in FoFCou.
 Inv3:  Mode=1 IEnd=    14427747.
 Iteration    1 A*A^-1 deviation from unit magnitude is 2.44D-15 for    936.
 Iteration    1 A*A^-1 deviation from orthogonality  is 2.01D-15 for   1125     30.
 Iteration    1 A^-1*A deviation from unit magnitude is 2.33D-15 for    104.
 Iteration    1 A^-1*A deviation from orthogonality  is 1.16D-13 for   1607   1573.
 E= -3263.12404253622    
 DIIS: error= 8.73D-05 at cycle   1 NSaved=   1.
 NSaved= 1 IEnMin= 1 EnMin= -3263.12404253622     IErMin= 1 ErrMin= 8.73D-05
 ErrMax= 8.73D-05  0.00D+00 EMaxC= 1.00D-01 BMatC= 5.07D-06 BMatP= 5.07D-06
 IDIUse=1 WtCom= 1.00D+00 WtEn= 0.00D+00
 Coeff-Com:  0.100D+01
 Coeff:      0.100D+01
 Gap=     0.728 Goal=   None    Shift=    0.000
 Gap=     0.797 Goal=   None    Shift=    0.000
 RMSDP=9.12D-06 MaxDP=5.53D-04              OVMax= 4.44D-04

 Cycle   2  Pass 1  IDiag  1:
 RMSU=  9.11D-06    CP:  1.00D+00
 E= -3263.12404428515     Delta-E=       -0.000001748929 Rises=F Damp=F
 DIIS: error= 8.83D-06 at cycle   2 NSaved=   2.
 NSaved= 2 IEnMin= 2 EnMin= -3263.12404428515     IErMin= 2 ErrMin= 8.83D-06
 ErrMax= 8.83D-06  0.00D+00 EMaxC= 1.00D-01 BMatC= 5.31D-08 BMatP= 5.07D-06
 IDIUse=1 WtCom= 1.00D+00 WtEn= 0.00D+00
 Coeff-Com: -0.547D-01 0.105D+01
 Coeff:     -0.547D-01 0.105D+01
 Gap=     0.112 Goal=   None    Shift=    0.000
 Gap=     0.133 Goal=   None    Shift=    0.000
 RMSDP=1.31D-06 MaxDP=6.56D-05 DE=-1.75D-06 OVMax= 1.02D-04

 Cycle   3  Pass 1  IDiag  1:
 RMSU=  1.24D-06    CP:  1.00D+00  1.04D+00
 E= -3263.12404429305     Delta-E=       -0.000000007906 Rises=F Damp=F
 DIIS: error= 1.14D-05 at cycle   3 NSaved=   3.
 NSaved= 3 IEnMin= 3 EnMin= -3263.12404429305     IErMin= 2 ErrMin= 8.83D-06
 ErrMax= 1.14D-05  0.00D+00 EMaxC= 1.00D-01 BMatC= 1.00D-07 BMatP= 5.31D-08
 IDIUse=1 WtCom= 1.00D+00 WtEn= 0.00D+00
 Coeff-Com: -0.427D-01 0.670D+00 0.373D+00
 Coeff:     -0.427D-01 0.670D+00 0.373D+00
 Gap=     0.112 Goal=   None    Shift=    0.000
 Gap=     0.133 Goal=   None    Shift=    0.000
 RMSDP=9.38D-07 MaxDP=4.31D-05 DE=-7.91D-09 OVMax= 4.22D-05

 Cycle   4  Pass 1  IDiag  1:
 RMSU=  5.19D-07    CP:  1.00D+00  1.05D+00  4.00D-01
 E= -3263.12404431100     Delta-E=       -0.000000017945 Rises=F Damp=F
 DIIS: error= 2.24D-06 at cycle   4 NSaved=   4.
 NSaved= 4 IEnMin= 4 EnMin= -3263.12404431100     IErMin= 4 ErrMin= 2.24D-06
 ErrMax= 2.24D-06  0.00D+00 EMaxC= 1.00D-01 BMatC= 4.58D-09 BMatP= 5.31D-08
 IDIUse=1 WtCom= 1.00D+00 WtEn= 0.00D+00
 Coeff-Com: -0.104D-01 0.971D-01 0.180D+00 0.733D+00
 Coeff:     -0.104D-01 0.971D-01 0.180D+00 0.733D+00
 Gap=     0.112 Goal=   None    Shift=    0.000
 Gap=     0.133 Goal=   None    Shift=    0.000
 RMSDP=1.92D-07 MaxDP=7.71D-06 DE=-1.79D-08 OVMax= 1.26D-05

 Cycle   5  Pass 1  IDiag  1:
 RMSU=  1.00D-07    CP:  1.00D+00  1.05D+00  5.12D-01  8.57D-01
 E= -3263.12404431203     Delta-E=       -0.000000001029 Rises=F Damp=F
 DIIS: error= 5.49D-07 at cycle   5 NSaved=   5.
 NSaved= 5 IEnMin= 5 EnMin= -3263.12404431203     IErMin= 5 ErrMin= 5.49D-07
 ErrMax= 5.49D-07  0.00D+00 EMaxC= 1.00D-01 BMatC= 3.02D-10 BMatP= 4.58D-09
 IDIUse=1 WtCom= 1.00D+00 WtEn= 0.00D+00
 Coeff-Com:  0.413D-03-0.256D-01 0.283D-01 0.252D+00 0.745D+00
 Coeff:      0.413D-03-0.256D-01 0.283D-01 0.252D+00 0.745D+00
 Gap=     0.112 Goal=   None    Shift=    0.000
 Gap=     0.133 Goal=   None    Shift=    0.000
 RMSDP=5.37D-08 MaxDP=2.08D-06 DE=-1.03D-09 OVMax= 4.93D-06

 Cycle   6  Pass 1  IDiag  1:
 RMSU=  4.41D-08    CP:  1.00D+00  1.05D+00  5.16D-01  9.00D-01  8.00D-01
 E= -3263.12404431196     Delta-E=        0.000000000064 Rises=F Damp=F
 DIIS: error= 3.95D-07 at cycle   6 NSaved=   6.
 NSaved= 6 IEnMin= 5 EnMin= -3263.12404431203     IErMin= 6 ErrMin= 3.95D-07
 ErrMax= 3.95D-07  0.00D+00 EMaxC= 1.00D-01 BMatC= 1.79D-10 BMatP= 3.02D-10
 IDIUse=1 WtCom= 1.00D+00 WtEn= 0.00D+00
 Coeff-Com:  0.151D-02-0.262D-01-0.380D-02 0.664D-01 0.476D+00 0.486D+00
 Coeff:      0.151D-02-0.262D-01-0.380D-02 0.664D-01 0.476D+00 0.486D+00
 Gap=     0.112 Goal=   None    Shift=    0.000
 Gap=     0.133 Goal=   None    Shift=    0.000
 RMSDP=2.52D-08 MaxDP=1.05D-06 DE= 6.37D-11 OVMax= 2.51D-06

 Cycle   7  Pass 1  IDiag  1:
 RMSU=  1.47D-08    CP:  1.00D+00  1.05D+00  5.18D-01  9.05D-01  9.10D-01
                    CP:  6.22D-01
 E= -3263.12404431204     Delta-E=       -0.000000000078 Rises=F Damp=F
 DIIS: error= 7.87D-08 at cycle   7 NSaved=   7.
 NSaved= 7 IEnMin= 7 EnMin= -3263.12404431204     IErMin= 7 ErrMin= 7.87D-08
 ErrMax= 7.87D-08  0.00D+00 EMaxC= 1.00D-01 BMatC= 5.55D-12 BMatP= 1.79D-10
 IDIUse=1 WtCom= 1.00D+00 WtEn= 0.00D+00
 Coeff-Com:  0.420D-03-0.537D-02-0.365D-02-0.398D-02 0.681D-01 0.140D+00
 Coeff-Com:  0.804D+00
 Coeff:      0.420D-03-0.537D-02-0.365D-02-0.398D-02 0.681D-01 0.140D+00
 Coeff:      0.804D+00
 Gap=     0.112 Goal=   None    Shift=    0.000
 Gap=     0.133 Goal=   None    Shift=    0.000
 RMSDP=7.22D-09 MaxDP=2.47D-07 DE=-7.82D-11 OVMax= 1.80D-06

 Error on total polarization charges =  0.01434
 SCF Done:  E(UB3LYP) =  -3263.12404431     A.U. after    7 cycles
            NFock=  7  Conv=0.72D-08     -V/T= 2.0017
 <Sx>= 0.0000 <Sy>= 0.0000 <Sz>= 0.5000 <S**2>= 0.7729 S= 0.5114
 <L.S>= 0.000000000000E+00
 KE= 3.257438632796D+03 PE=-1.054438753914D+04 EE= 2.630795053124D+03
 Annihilation of the first spin contaminant:
 S**2 before annihilation     0.7729,   after     0.7504
 Leave Link  502 at Thu Jan 09 23:33:12 2020, MaxMem=   134217728 cpu:       557.0
 (Enter E:\Gaussian\G09W\l701.exe)
 Compute integral first derivatives.
 ... and contract with generalized density number  0.
 R6Disp: Adding Grimme-D3(BJ) dispersion energy 1st derivatives to the gradient.
 D1PCM: PCM CHGder 1st derivatives, ID1Alg=3 FixD1E=F DoIter=F DoCFld=F I1PDM=0.
 GePol: Maximum number of non-zero 1st derivatives   =     349
 Leave Link  701 at Thu Jan 09 23:33:34 2020, MaxMem=   134217728 cpu:        22.0
 (Enter E:\Gaussian\G09W\l702.exe)
 L702 exits ... SP integral derivatives will be done elsewhere.
 Leave Link  702 at Thu Jan 09 23:33:34 2020, MaxMem=   134217728 cpu:         0.0
 (Enter E:\Gaussian\G09W\l703.exe)
 Compute integral first derivatives, UseDBF=F ICtDFT=           0.
 Integral derivatives from FoFJK, PRISM(SPDF).
 Calling FoFJK, ICntrl=      2127 FMM=F ISym2X=0 I1Cent= 0 IOpClX= 1 NMat=1 NMatS=1 NMatT=0.
 FoFJK:  IHMeth= 1 ICntrl=    2127 DoSepK=F KAlg= 0 I1Cent=   0 FoldK=F
 IRaf=         0 NMat=   1 IRICut=       1 DoRegI=T DoRafI=F ISym2E= 0.
 FoFCou: FMM=F IPFlag=           0 FMFlag=      100000 FMFlg1=         800
         NFxFlg=           0 DoJE=F BraDBF=F KetDBF=F FulRan=T
         wScrn=  0.000000 ICntrl=    2127 IOpCl=  1 I1Cent=           0 NGrid=           0
         NMat0=    1 NMatS0=      1 NMatT0=    0 NMatD0=    1 NMtDS0=    0 NMtDT0=    0
 Symmetry not used in FoFCou.
 Leave Link  703 at Thu Jan 09 23:36:54 2020, MaxMem=   134217728 cpu:       199.0
 (Enter E:\Gaussian\G09W\l716.exe)
 Dipole        =-1.29548094D+00-2.20563985D+00 7.39063852D-04
 ***** Axes restored to original set *****
 -------------------------------------------------------------------
 Center     Atomic                   Forces (Hartrees/Bohr)
 Number     Number              X              Y              Z
 -------------------------------------------------------------------
      1        6           0.000008662   -0.000022586   -0.000000603
      2        6           0.000023030   -0.000012043    0.000000419
      3        6          -0.000006990    0.000027384   -0.000001849
      4        6          -0.000003754   -0.000029807   -0.000003038
      5        6          -0.000008550    0.000000498    0.000001751
      6        6           0.000001084   -0.000004230    0.000000279
      7        1           0.000003110   -0.000012178    0.000000566
      8        1          -0.000003957   -0.000008664   -0.000000809
      9        1          -0.000009950   -0.000008111   -0.000002064
     10        1          -0.000004110   -0.000011002   -0.000000285
     11        6          -0.000008142   -0.000000089    0.000004995
     12        6          -0.000002440   -0.000035662    0.000005319
     13        6          -0.000017869   -0.000009600    0.000001699
     14        6           0.000023264    0.000031108   -0.000002620
     15        6           0.000017360    0.000006031    0.000000370
     16        6          -0.000011752    0.000007177    0.000000507
     17        6          -0.000012570    0.000023264    0.000000000
     18        1          -0.000003569    0.000006936    0.000000347
     19        6           0.000001169    0.000003055   -0.000000599
     20        1           0.000018124    0.000000892   -0.000000465
     21        1           0.000002650    0.000009396    0.000000393
     22       35          -0.000004358    0.000016219    0.000000058
     23        8           0.000013515    0.000024791   -0.000001866
     24        8           0.000000158   -0.000003969   -0.000008968
     25        1          -0.000014116    0.000001188    0.000006464
 -------------------------------------------------------------------
 Cartesian Forces:  Max     0.000035662 RMS     0.000011605
 Leave Link  716 at Thu Jan 09 23:36:55 2020, MaxMem=   134217728 cpu:         0.0
 (Enter E:\Gaussian\G09W\l103.exe)

 GradGradGradGradGradGradGradGradGradGradGradGradGradGradGradGradGradGrad
 Berny optimization.
 Using GEDIIS/GDIIS optimizer.
 FormGI is forming the generalized inverse of G from B-inverse, IUseBI=4.
 Internal  Forces:  Max     0.000027035 RMS     0.000005278
 Search for a local minimum.
 Step number   7 out of a maximum of  146
 All quantities printed in internal units (Hartrees-Bohrs-Radians)
 RMS Force = .52784D-05 SwitMx=.10000D-02 MixMth= 2
 Mixed Optimization -- En-DIIS/RFO-DIIS
 Swapping is turned off.
 Update second derivatives using D2CorX and points    1    2    3    4    5
                                                      6    7
 DE= -1.22D-07 DEPred=-1.03D-07 R= 1.18D+00
 Trust test= 1.18D+00 RLast= 5.69D-03 DXMaxT set to 1.50D-01
 ITU=  0  0  1 -1  1  1  0
     Eigenvalues ---    0.00435   0.01259   0.01624   0.01692   0.01722
     Eigenvalues ---    0.01761   0.01819   0.01857   0.01873   0.02051
     Eigenvalues ---    0.02070   0.02088   0.02102   0.02132   0.02153
     Eigenvalues ---    0.02169   0.02184   0.02188   0.02202   0.02233
     Eigenvalues ---    0.02260   0.04245   0.13674   0.15999   0.16000
     Eigenvalues ---    0.16000   0.16002   0.16039   0.16122   0.16897
     Eigenvalues ---    0.17736   0.21689   0.22296   0.22769   0.23709
     Eigenvalues ---    0.24026   0.24693   0.24732   0.24999   0.25000
     Eigenvalues ---    0.25020   0.25536   0.29945   0.33182   0.34705
     Eigenvalues ---    0.35436   0.35481   0.35523   0.35598   0.35684
     Eigenvalues ---    0.35741   0.36015   0.37750   0.39894   0.40839
     Eigenvalues ---    0.41135   0.41813   0.43457   0.43527   0.44482
     Eigenvalues ---    0.45468   0.46744   0.47265   0.47505   0.48577
     Eigenvalues ---    0.51533   0.54457   0.56391   0.78997
 En-DIIS/RFO-DIIS IScMMF=        0 using points:     7    6    5    4    3
 RFO step:  Lambda= 0.00000000D+00.
 NNeg= 0 NP= 5 Switch=  2.50D-03 Rises=F DC= -1.79D-07 SmlDif=  1.00D-05
 RMS Error=  0.1276935344D-04 NUsed= 5 EDIIS=F
 DidBck=F Rises=F RFO-DIIS coefs:    1.25229   -0.44383    0.22167   -0.00850   -0.02162
 Iteration  1 RMS(Cart)=  0.00019986 RMS(Int)=  0.00000009
 Iteration  2 RMS(Cart)=  0.00000009 RMS(Int)=  0.00000001
 ITry= 1 IFail=0 DXMaxC= 1.81D-03 DCOld= 1.00D+10 DXMaxT= 1.50D-01 DXLimC= 3.00D+00 Rises=F
 Variable       Old X    -DE/DX   Delta X   Delta X   Delta X     New X
                                 (Linear)    (Quad)   (Total)
    R1        2.61487   0.00001   0.00000   0.00001   0.00001   2.61488
    R2        2.65433  -0.00001   0.00001  -0.00001  -0.00001   2.65433
    R3        2.04810   0.00000   0.00000   0.00000   0.00001   2.04810
    R4        2.64641   0.00001   0.00000   0.00002   0.00003   2.64643
    R5        2.04654   0.00000   0.00000   0.00000   0.00000   2.04653
    R6        2.69445   0.00002  -0.00001   0.00005   0.00004   2.69450
    R7        2.78197   0.00000   0.00002  -0.00001   0.00001   2.78198
    R8        2.67736   0.00000   0.00000   0.00000   0.00000   2.67736
    R9        2.69417   0.00000  -0.00001   0.00003   0.00001   2.69419
   R10        2.60732   0.00001   0.00000   0.00001   0.00002   2.60733
   R11        2.05024   0.00000   0.00000   0.00000   0.00001   2.05025
   R12        2.04840   0.00000   0.00000   0.00000   0.00000   2.04840
   R13        2.69225   0.00001   0.00001  -0.00001   0.00000   2.69225
   R14        2.54603   0.00000   0.00000   0.00000   0.00000   2.54604
   R15        2.77705   0.00000   0.00002  -0.00001   0.00001   2.77706
   R16        2.33982   0.00003  -0.00001   0.00003   0.00002   2.33985
   R17        2.68331   0.00002  -0.00001   0.00004   0.00003   2.68334
   R18        2.67458  -0.00001   0.00001  -0.00003  -0.00002   2.67457
   R19        2.64725   0.00001   0.00001   0.00001   0.00002   2.64726
   R20        2.60174   0.00001   0.00000   0.00002   0.00002   2.60176
   R21        2.04189   0.00000   0.00000   0.00001   0.00000   2.04189
   R22        2.61278   0.00001   0.00000   0.00001   0.00002   2.61280
   R23        2.04634   0.00000   0.00000   0.00000  -0.00001   2.04634
   R24        2.65350  -0.00001   0.00000  -0.00001  -0.00001   2.65349
   R25        3.62374   0.00000   0.00001   0.00000   0.00001   3.62374
   R26        2.04505   0.00000   0.00000   0.00000   0.00000   2.04505
   R27        1.82283  -0.00001   0.00000  -0.00001  -0.00001   1.82282
    A1        2.08885   0.00000   0.00000  -0.00002  -0.00001   2.08883
    A2        2.09921   0.00000   0.00000   0.00000   0.00000   2.09922
    A3        2.09513   0.00000   0.00000   0.00002   0.00001   2.09514
    A4        2.11336   0.00001   0.00000   0.00002   0.00002   2.11339
    A5        2.11321   0.00001  -0.00001   0.00004   0.00003   2.11324
    A6        2.05661  -0.00001   0.00001  -0.00007  -0.00006   2.05656
    A7        2.08714  -0.00001   0.00000  -0.00002  -0.00002   2.08712
    A8        2.07576   0.00001   0.00000   0.00002   0.00003   2.07578
    A9        2.12028   0.00000   0.00000  -0.00001  -0.00001   2.12028
   A10        2.06449   0.00000   0.00001  -0.00002  -0.00001   2.06448
   A11        2.08113   0.00000   0.00001  -0.00001   0.00000   2.08113
   A12        2.13756   0.00000  -0.00002   0.00003   0.00001   2.13758
   A13        2.11051   0.00001  -0.00001   0.00002   0.00002   2.11053
   A14        2.11577   0.00000  -0.00001  -0.00001  -0.00002   2.11575
   A15        2.05691   0.00000   0.00001  -0.00001   0.00000   2.05691
   A16        2.10201   0.00000   0.00000   0.00001   0.00000   2.10202
   A17        2.09453   0.00000   0.00000  -0.00001  -0.00001   2.09452
   A18        2.08664   0.00000   0.00000   0.00001   0.00001   2.08665
   A19        2.12059   0.00000   0.00000   0.00000   0.00000   2.12060
   A20        2.14495   0.00000  -0.00003   0.00004   0.00001   2.14496
   A21        2.01764   0.00000   0.00003  -0.00004  -0.00001   2.01763
   A22        2.03666   0.00000  -0.00001   0.00002   0.00001   2.03667
   A23        2.12402   0.00000   0.00001  -0.00001  -0.00001   2.12402
   A24        2.12250   0.00000   0.00000   0.00000   0.00000   2.12249
   A25        2.09352   0.00000   0.00000   0.00000   0.00000   2.09352
   A26        2.10753   0.00000   0.00001  -0.00003  -0.00002   2.10751
   A27        2.08214   0.00000  -0.00001   0.00002   0.00001   2.08215
   A28        2.11418   0.00000   0.00000  -0.00001  -0.00001   2.11417
   A29        2.08626   0.00001  -0.00001   0.00005   0.00004   2.08630
   A30        2.08275  -0.00001   0.00001  -0.00004  -0.00004   2.08271
   A31        2.08191   0.00000   0.00000   0.00001   0.00001   2.08192
   A32        2.08840   0.00000   0.00000  -0.00002  -0.00002   2.08839
   A33        2.11287   0.00000   0.00000   0.00001   0.00001   2.11287
   A34        2.11792   0.00001   0.00000   0.00002   0.00002   2.11794
   A35        2.06338  -0.00001   0.00001  -0.00007  -0.00006   2.06332
   A36        2.10189   0.00001  -0.00001   0.00005   0.00004   2.10192
   A37        2.13163   0.00000   0.00000  -0.00001  -0.00001   2.13162
   A38        2.08047   0.00000   0.00000   0.00002   0.00001   2.08048
   A39        2.07109   0.00000   0.00000   0.00000   0.00000   2.07108
   A40        2.07002   0.00000   0.00000   0.00000   0.00000   2.07002
   A41        2.10941   0.00000   0.00000   0.00002   0.00002   2.10944
   A42        2.10375  -0.00001   0.00000  -0.00002  -0.00002   2.10372
   A43        1.95615   0.00000   0.00000   0.00000   0.00000   1.95616
    D1       -0.00006   0.00000   0.00003   0.00002   0.00005  -0.00001
    D2        3.14150   0.00000   0.00004   0.00003   0.00008   3.14158
    D3        3.14158   0.00000   0.00000   0.00001   0.00001   3.14159
    D4       -0.00005   0.00000   0.00002   0.00002   0.00004  -0.00001
    D5        0.00005   0.00000  -0.00003  -0.00002  -0.00005   0.00001
    D6       -3.14149   0.00000  -0.00005  -0.00004  -0.00009  -3.14158
    D7       -3.14158   0.00000   0.00000  -0.00001  -0.00001  -3.14159
    D8        0.00006   0.00000  -0.00002  -0.00002  -0.00005   0.00001
    D9       -0.00002   0.00000   0.00001   0.00001   0.00002   0.00000
   D10        3.14151   0.00000   0.00005   0.00002   0.00007   3.14158
   D11       -3.14158   0.00000   0.00000  -0.00001  -0.00001  -3.14159
   D12       -0.00005   0.00000   0.00004   0.00001   0.00004   0.00000
   D13        0.00010   0.00000  -0.00006  -0.00003  -0.00009   0.00001
   D14       -3.14150   0.00000  -0.00005  -0.00002  -0.00007  -3.14157
   D15       -3.14143   0.00000  -0.00010  -0.00005  -0.00015  -3.14157
   D16        0.00015   0.00000  -0.00009  -0.00003  -0.00013   0.00002
   D17       -3.14152   0.00000  -0.00003  -0.00003  -0.00006  -3.14159
   D18        0.00001   0.00000  -0.00001   0.00000   0.00000   0.00001
   D19        0.00001   0.00000   0.00001  -0.00001  -0.00001   0.00000
   D20        3.14154   0.00000   0.00003   0.00002   0.00005  -3.14159
   D21       -0.00011   0.00000   0.00006   0.00003   0.00010  -0.00001
   D22        3.14132   0.00000   0.00015   0.00008   0.00024   3.14155
   D23        3.14150   0.00000   0.00005   0.00002   0.00008   3.14157
   D24       -0.00026   0.00000   0.00015   0.00007   0.00022  -0.00004
   D25       -0.00020   0.00000   0.00012   0.00005   0.00017  -0.00003
   D26        3.14156   0.00000   0.00001   0.00000   0.00001   3.14157
   D27        3.14137   0.00000   0.00012   0.00007   0.00019   3.14156
   D28       -0.00005   0.00000   0.00002   0.00001   0.00003  -0.00002
   D29        0.00003   0.00000  -0.00002  -0.00001  -0.00003   0.00000
   D30        3.14158   0.00000   0.00001   0.00001   0.00001   3.14159
   D31       -3.14140   0.00000  -0.00011  -0.00006  -0.00017  -3.14157
   D32        0.00015   0.00000  -0.00008  -0.00004  -0.00012   0.00002
   D33        0.00009   0.00000  -0.00006  -0.00002  -0.00008   0.00001
   D34       -3.14153   0.00000  -0.00003  -0.00002  -0.00006  -3.14158
   D35        3.14153   0.00000   0.00004   0.00003   0.00007  -3.14158
   D36       -0.00009   0.00000   0.00006   0.00003   0.00009   0.00000
   D37       -0.00137   0.00001   0.00086   0.00036   0.00123  -0.00014
   D38        3.14038   0.00000   0.00076   0.00031   0.00108   3.14146
   D39       -0.00012   0.00000   0.00006   0.00005   0.00010  -0.00002
   D40        3.14154   0.00000   0.00002   0.00003   0.00004   3.14158
   D41        3.14153   0.00000   0.00003   0.00001   0.00004   3.14157
   D42        0.00000   0.00000  -0.00001   0.00000  -0.00001  -0.00001
   D43        0.00007   0.00000  -0.00003  -0.00003  -0.00006   0.00001
   D44       -3.14158   0.00000   0.00000  -0.00001  -0.00001  -3.14159
   D45       -3.14149   0.00000  -0.00006  -0.00003  -0.00008  -3.14158
   D46        0.00003   0.00000  -0.00002  -0.00001  -0.00003   0.00001
   D47        3.14158   0.00000   0.00000   0.00001   0.00001   3.14159
   D48       -0.00002   0.00000   0.00001   0.00001   0.00002   0.00000
   D49       -0.00004   0.00000   0.00002   0.00001   0.00003  -0.00001
   D50        3.14154   0.00000   0.00003   0.00001   0.00004   3.14159
   D51        3.14153   0.00000   0.00004   0.00002   0.00005   3.14158
   D52       -0.00006   0.00000   0.00003   0.00002   0.00005  -0.00001
   D53        0.00000   0.00000   0.00000   0.00000   0.00000   0.00000
   D54       -3.14159   0.00000  -0.00001   0.00000   0.00000   3.14159
   D55        0.00001   0.00000  -0.00001   0.00000  -0.00001   0.00000
   D56       -3.14159   0.00000   0.00000   0.00000   0.00000  -3.14159
   D57       -3.14157   0.00000  -0.00002   0.00000  -0.00002  -3.14159
   D58        0.00001   0.00000  -0.00001   0.00000  -0.00001   0.00000
   D59       -0.00002   0.00000   0.00001   0.00001   0.00002   0.00000
   D60       -3.14159   0.00000   0.00000   0.00000   0.00000  -3.14159
   D61        3.14157   0.00000   0.00002   0.00000   0.00002   3.14159
   D62        0.00000   0.00000   0.00001  -0.00001   0.00000   0.00000
   D63        0.00002   0.00000  -0.00001  -0.00001  -0.00001   0.00000
   D64        3.14158   0.00000   0.00000   0.00001   0.00001   3.14159
   D65       -3.14156   0.00000  -0.00002  -0.00001  -0.00002  -3.14159
   D66        0.00000   0.00000  -0.00001   0.00001   0.00000   0.00000
         Item               Value     Threshold  Converged?
 Maximum Force            0.000027     0.000450     YES
 RMS     Force            0.000005     0.000300     YES
 Maximum Displacement     0.001813     0.001800     NO 
 RMS     Displacement     0.000200     0.001200     YES
 Predicted change in Energy=-1.107201D-08
 Lowest energy point so far.  Saving SCF results.
 GradGradGradGradGradGradGradGradGradGradGradGradGradGradGradGradGradGrad

 Leave Link  103 at Thu Jan 09 23:36:55 2020, MaxMem=   134217728 cpu:         0.0
 (Enter E:\Gaussian\G09W\l202.exe)
                          Input orientation:                          
 ---------------------------------------------------------------------
 Center     Atomic      Atomic             Coordinates (Angstroms)
 Number     Number       Type             X           Y           Z
 ---------------------------------------------------------------------
      1          6           0       -3.745178    0.642799    0.000801
      2          6           0       -4.782324    1.558798    0.001064
      3          6           0       -6.118224    1.138583    0.000950
      4          6           0       -6.417650   -0.255489    0.000553
      5          6           0       -5.338838   -1.173898    0.000304
      6          6           0       -4.031681   -0.732280    0.000424
      7          1           0       -2.716023    0.982624    0.000887
      8          1           0       -4.587371    2.624084    0.001369
      9          1           0       -5.512014   -2.244932    0.000036
     10          1           0       -3.223316   -1.454448    0.000231
     11          6           0       -7.780197   -0.675124    0.000417
     12          6           0       -7.184229    2.153907    0.001252
     13          6           0       -8.849174    0.266680    0.000707
     14          6           0       -8.567754    1.658476    0.001126
     15          6           0      -10.196232   -0.167558    0.000579
     16          6           0       -9.628816    2.573127    0.001411
     17          6           0      -11.205655    0.768724    0.000871
     18          1           0      -10.416982   -1.225292    0.000255
     19          6           0      -10.944603    2.148410    0.001292
     20          1           0       -9.393664    3.630162    0.001729
     21          1           0      -11.758253    2.861933    0.001513
     22         35           0      -13.029920    0.177744    0.000700
     23          8           0       -6.928743    3.365455    0.001594
     24          8           0       -8.146571   -1.971657    0.000018
     25          1           0       -7.384998   -2.563645   -0.000283
 ---------------------------------------------------------------------
                    Distance matrix (angstroms):
                    1          2          3          4          5
     1  C    0.000000
     2  C    1.383736   0.000000
     3  C    2.424283   1.400431   0.000000
     4  C    2.819402   2.442525   1.425866   0.000000
     5  C    2.416638   2.788787   2.440290   1.416796   0.000000
     6  C    1.404609   2.410913   2.802462   2.433141   1.379741
     7  H    1.083808   2.145128   3.405773   3.903199   3.395548
     8  H    2.152854   1.082978   2.133125   3.412018   3.871611
     9  H    3.385365   3.873087   3.437392   2.185877   1.084944
    10  H    2.161199   3.392662   3.886425   3.411931   2.134043
    11  C    4.244796   3.738669   2.460018   1.425702   2.491788
    12  C    3.756397   2.474531   1.472158   2.528405   3.805227
    13  C    5.117836   4.267181   2.866759   2.486960   3.794433
    14  C    4.928370   3.786742   2.504094   2.878577   4.295141
    15  C    6.501752   5.682491   4.282074   3.779605   4.960544
    16  C    6.192202   4.951500   3.792384   4.279329   5.695973
    17  C    7.461539   6.471738   5.100858   4.896326   6.180075
    18  H    6.928400   6.284944   4.905836   4.115236   5.078403
    19  C    7.355174   6.190422   4.930891   5.125626   6.516313
    20  H    6.389815   5.055196   4.115395   4.894379   6.286542
    21  H    8.314682   7.096602   5.897446   6.183880   7.582666
    22  Br   9.296381   8.362424   6.978162   6.626447   7.808948
    23  O    4.189026   2.805552   2.369788   3.656836   4.809732
    24  O    5.119340   4.876707   3.713191   2.436062   2.918867
    25  H    4.850729   4.875289   3.912954   2.502667   2.473493
                    6          7          8          9         10
     6  C    0.000000
     7  H    2.161447   0.000000
     8  H    3.402054   2.489243   0.000000
     9  H    2.116483   4.270208   4.956035   0.000000
    10  H    1.083965   2.489310   4.300589   2.421364   0.000000
    11  C    3.748951   5.328600   4.591177   2.758433   4.623041
    12  C    4.274182   4.619174   2.639080   4.705963   5.358083
    13  C    4.919976   6.174797   4.870351   4.176701   5.883244
    14  C    5.127540   5.890630   4.095833   4.957231   6.184926
    15  C    6.190364   7.568120   6.265189   5.124196   7.090673
    16  C    6.500280   7.093406   5.041703   6.337330   7.566491
    17  C    7.329319   8.492326   6.873430   6.442024   8.286147
    18  H    6.404305   8.011220   6.985847   5.009828   7.197314
    19  C    7.489117   8.310751   6.375004   6.986736   8.520497
    20  H    6.912436   7.183338   4.910464   7.041586   7.995402
    21  H    8.521637   9.235460   7.174826   8.068183   9.564324
    22  Br   9.044138  10.345254   8.789836   7.898624   9.941505
    23  O    5.018406   4.839926   2.455942   5.786498   6.079609
    24  O    4.297484   6.182121   5.812808   2.648692   4.950348
    25  H    3.820816   5.863049   5.894001   1.899908   4.306962
                   11         12         13         14         15
    11  C    0.000000
    12  C    2.891123   0.000000
    13  C    1.424678   2.516678   0.000000
    14  C    2.462911   1.469555   1.419962   0.000000
    15  C    2.468775   3.802810   1.415319   2.446700   0.000000
    16  C    3.737449   2.480273   2.434654   1.400872   2.798806
    17  C    3.717319   4.253304   2.409367   2.783915   1.376793
    18  H    2.693570   4.676502   2.164255   3.425749   1.080523
    19  C    4.240968   3.760378   2.816333   2.426819   2.433879
    20  H    4.597691   2.657242   3.407268   2.137680   3.881596
    21  H    5.323129   4.628499   3.898472   3.409927   3.408479
    22  Br   5.318550   6.170682   4.181691   4.701435   2.854648
    23  O    4.129316   1.238193   3.645608   2.366460   4.812345
    24  O    1.347304   4.236316   2.346019   3.654485   2.730546
    25  H    1.929428   4.721822   3.186620   4.384657   3.693815
                   16         17         18         19         20
    16  C    0.000000
    17  C    2.396307   0.000000
    18  H    3.879328   2.144319   0.000000
    19  C    1.382635   1.404166   3.414711   0.000000
    20  H    1.082875   3.386906   4.962117   2.144994   0.000000
    21  H    2.148933   2.164923   4.301676   1.082193   2.486253
    22  Br   4.159971   1.917602   2.965797   2.869158   5.014134
    23  O    2.813926   5.003497   5.765654   4.196229   2.479094
    24  O    4.780388   4.107028   2.389942   4.980355   5.738956
    25  H    5.605457   5.069724   3.314228   5.905442   6.511373
                   21         22         23         24         25
    21  H    0.000000
    22  Br   2.970186   0.000000
    23  O    4.855688   6.883739   0.000000
    24  O    6.033891   5.335449   5.474291   0.000000
    25  H    6.968662   6.275376   5.946628   0.964595   0.000000
 Stoichiometry    C14H8BrO2(2)
 Framework group  C1[X(C14H8BrO2)]
 Deg. of freedom    69
 Full point group                 C1      NOp   1
 RotChk:  IX=0 Diff= 3.93D-05
 Largest Abelian subgroup         C1      NOp   1
 Largest concise Abelian subgroup C1      NOp   1
                         Standard orientation:                         
 ---------------------------------------------------------------------
 Center     Atomic      Atomic             Coordinates (Angstroms)
 Number     Number       Type             X           Y           Z
 ---------------------------------------------------------------------
      1          6           0       -5.068660    0.090181    0.000001
      2          6           0       -4.031023    1.005624    0.000013
      3          6           0       -2.695349    0.584694    0.000008
      4          6           0       -2.396670   -0.809539   -0.000007
      5          6           0       -3.475974   -1.727369   -0.000033
      6          6           0       -4.782894   -1.285051   -0.000027
      7          1           0       -6.097632    0.430558    0.000011
      8          1           0       -4.225405    2.071015    0.000022
      9          1           0       -3.303373   -2.798496   -0.000081
     10          1           0       -5.591646   -2.006785   -0.000050
     11          6           0       -1.034349   -1.229904    0.000010
     12          6           0       -1.628799    1.599446    0.000009
     13          6           0        0.035134   -0.288673    0.000002
     14          6           0       -0.245541    1.103273   -0.000006
     15          6           0        1.381959   -0.723634    0.000007
     16          6           0        0.816012    2.017355   -0.000017
     17          6           0        2.391883    0.212107   -0.000005
     18          1           0        1.602141   -1.781485    0.000020
     19          6           0        2.131571    1.591933   -0.000019
     20          1           0        0.581427    3.074516   -0.000023
     21          1           0        2.945604    2.305020   -0.000026
     22         35           0        4.215831   -0.379851   -0.000002
     23          8           0       -1.883636    2.811130    0.000025
     24          8           0       -0.668669   -2.526633    0.000027
     25          1           0       -1.430559   -3.118213    0.000150
 ---------------------------------------------------------------------
 Rotational constants (GHZ):      0.9830220      0.1774932      0.1503468
 Leave Link  202 at Thu Jan 09 23:36:55 2020, MaxMem=   134217728 cpu:         0.0
 (Enter E:\Gaussian\G09W\l301.exe)
 Standard basis: 6-311G(d) (5D, 7F)
 Ernie: Thresh=  0.10000D-02 Tol=  0.10000D-05 Strict=F.
 There are   375 symmetry adapted cartesian basis functions of A   symmetry.
 There are   356 symmetry adapted basis functions of A   symmetry.
   356 basis functions,   642 primitive gaussians,   375 cartesian basis functions
    72 alpha electrons       71 beta electrons
       nuclear repulsion energy      1393.0868126810 Hartrees.
 IExCor=  402 DFT=T Ex+Corr=B3LYP ExCW=0 ScaHFX=  0.200000
 ScaDFX=  0.800000  0.720000  1.000000  0.810000 ScalE2=  1.000000  1.000000
 IRadAn=      0 IRanWt=     -1 IRanGd=            0 ICorTp=0 IEmpDi=141
 NAtoms=   25 NActive=   25 NUniq=   25 SFac= 1.00D+00 NAtFMM=   60 NAOKFM=F Big=F
 Integral buffers will be    262144 words long.
 Raffenetti 2 integral format.
 Two-electron integral symmetry is turned on.
 R6Disp:  Grimme-D3(BJ) Dispersion energy=       -0.0633815792 Hartrees.
 Nuclear repulsion after empirical dispersion term =     1393.0234311017 Hartrees.
 ------------------------------------------------------------------------------
 Polarizable Continuum Model (PCM)
 =================================
 Model                : PCM (using non-symmetric T matrix).
 Atomic radii         : UFF (Universal Force Field).
 Polarization charges : Total charges.
 Charge compensation  : None.
 Solution method      : On-the-fly selection.
 Cavity type          : Scaled VdW (van der Waals Surface) (Alpha=1.100).
 Cavity algorithm     : GePol (No added spheres)
                        Default sphere list used, NSphG=   25.
                        Lebedev-Laikov grids with approx.  5.0 points / Ang**2.
                        Smoothing algorithm: Karplus/York (Gamma=1.0000).
                        Polarization charges: spherical gaussians, with
                                              point-specific exponents (IZeta= 3).
                        Self-potential: point-specific (ISelfS= 7).
                        Self-field    : sphere-specific E.n sum rule (ISelfD= 2).
 1st derivatives      : Analytical E(r).r(x)/FMM algorithm (CHGder, D1EAlg=3).
                        Cavity 1st derivative terms included.
 Solvent              : Acetonitrile, Eps=  35.688000 Eps(inf)=   1.806874
 ------------------------------------------------------------------------------
 GePol: Number of generator spheres                  =      25
 GePol: Total number of spheres                      =      25
 GePol: Number of exposed spheres                    =      25 (100.00%)
 GePol: Number of points                             =    2193
 GePol: Average weight of points                     =       0.13
 GePol: Minimum weight of points                     =   0.43D-10
 GePol: Maximum weight of points                     =    0.20577
 GePol: Number of points with low weight             =     139
 GePol: Fraction of low-weight points (<1% of avg)   =       6.34%
 GePol: Cavity surface area                          =    281.127 Ang**2
 GePol: Cavity volume                                =    308.172 Ang**3
 Leave Link  301 at Thu Jan 09 23:36:55 2020, MaxMem=   134217728 cpu:         0.0
 (Enter E:\Gaussian\G09W\l302.exe)
 NPDir=0 NMtPBC=     1 NCelOv=     1 NCel=       1 NClECP=     1 NCelD=      1
         NCelK=      1 NCelE2=     1 NClLst=     1 CellRange=     0.0.
 One-electron integrals computed using PRISM.
 NBasis=   356 RedAO= T EigKep=  8.58D-05  NBF=   356
 NBsUse=   356 1.00D-06 EigRej= -1.00D+00 NBFU=   356
 Precomputing XC quadrature grid using
 IXCGrd= 4 IRadAn=           0 IRanWt=          -1 IRanGd=           0 AccXCQ= 0.00D+00.
 Generated NRdTot=       0 NPtTot=           0 NUsed=           0 NTot=          16
 NSgBfM=   363   363   364   364   364 MxSgAt=    25 MxSgA2=    25.
 Leave Link  302 at Thu Jan 09 23:36:57 2020, MaxMem=   134217728 cpu:         1.0
 (Enter E:\Gaussian\G09W\l303.exe)
 DipDrv:  MaxL=1.
 Leave Link  303 at Thu Jan 09 23:36:58 2020, MaxMem=   134217728 cpu:         1.0
 (Enter E:\Gaussian\G09W\l401.exe)
 Initial guess from the checkpoint file:  "E:\Gaussian file\2-BrHAQ opt.chk"
 B after Tr=     0.000000    0.000000    0.000000
         Rot=    1.000000    0.000000    0.000000   -0.000001 Ang=   0.00 deg.
 Guess basis will be translated and rotated to current coordinates.
 JPrj=2 DoOrth=T DoCkMO=T.
 Initial guess <Sx>= 0.0000 <Sy>= 0.0000 <Sz>= 0.5000 <S**2>= 0.7729 S= 0.5114
 Leave Link  401 at Thu Jan 09 23:36:59 2020, MaxMem=   134217728 cpu:         1.0
 (Enter E:\Gaussian\G09W\l502.exe)
 UHF open shell SCF:
 Using DIIS extrapolation, IDIIS=  1040.
 Integral symmetry usage will be decided dynamically.
 IVT=      444890 IEndB=      444890 NGot=   134217728 MDV=   133930479
 LenX=   133930479 LenY=   133789413
 Requested convergence on RMS density matrix=1.00D-08 within 128 cycles.
 Requested convergence on MAX density matrix=1.00D-06.
 Requested convergence on             energy=1.00D-06.
 No special actions if energy rises.
 Fock matrices will be formed incrementally for  20 cycles.

 Cycle   1  Pass 1  IDiag  1:
 FoFJK:  IHMeth= 1 ICntrl=       0 DoSepK=F KAlg= 0 I1Cent=   0 FoldK=F
 IRaf= 780000000 NMat=   1 IRICut=       1 DoRegI=T DoRafI=F ISym2E= 0.
 FoFCou: FMM=F IPFlag=           0 FMFlag=      100000 FMFlg1=           0
         NFxFlg=           0 DoJE=F BraDBF=F KetDBF=F FulRan=T
         wScrn=  0.000000 ICntrl=       0 IOpCl=  1 I1Cent=           0 NGrid=           0
         NMat0=    1 NMatS0=      1 NMatT0=    0 NMatD0=    1 NMtDS0=    0 NMtDT0=    0
 Symmetry not used in FoFCou.
 Inv3:  Mode=1 IEnd=    14427747.
 Iteration    1 A*A^-1 deviation from unit magnitude is 3.66D-15 for   1389.
 Iteration    1 A*A^-1 deviation from orthogonality  is 2.33D-15 for   1391    371.
 Iteration    1 A^-1*A deviation from unit magnitude is 2.44D-15 for   1071.
 Iteration    1 A^-1*A deviation from orthogonality  is 1.19D-13 for   1606   1572.
 E= -3263.12404416243    
 DIIS: error= 2.62D-05 at cycle   1 NSaved=   1.
 NSaved= 1 IEnMin= 1 EnMin= -3263.12404416243     IErMin= 1 ErrMin= 2.62D-05
 ErrMax= 2.62D-05  0.00D+00 EMaxC= 1.00D-01 BMatC= 4.77D-07 BMatP= 4.77D-07
 IDIUse=1 WtCom= 1.00D+00 WtEn= 0.00D+00
 Coeff-Com:  0.100D+01
 Coeff:      0.100D+01
 Gap=     0.728 Goal=   None    Shift=    0.000
 Gap=     0.797 Goal=   None    Shift=    0.000
 RMSDP=2.84D-06 MaxDP=1.73D-04              OVMax= 1.35D-04

 Cycle   2  Pass 1  IDiag  1:
 RMSU=  2.84D-06    CP:  1.00D+00
 E= -3263.12404432912     Delta-E=       -0.000000166696 Rises=F Damp=F
 DIIS: error= 2.64D-06 at cycle   2 NSaved=   2.
 NSaved= 2 IEnMin= 2 EnMin= -3263.12404432912     IErMin= 2 ErrMin= 2.64D-06
 ErrMax= 2.64D-06  0.00D+00 EMaxC= 1.00D-01 BMatC= 3.98D-09 BMatP= 4.77D-07
 IDIUse=1 WtCom= 1.00D+00 WtEn= 0.00D+00
 Coeff-Com: -0.589D-01 0.106D+01
 Coeff:     -0.589D-01 0.106D+01
 Gap=     0.112 Goal=   None    Shift=    0.000
 Gap=     0.133 Goal=   None    Shift=    0.000
 RMSDP=3.03D-07 MaxDP=1.98D-05 DE=-1.67D-07 OVMax= 2.81D-05

 Cycle   3  Pass 1  IDiag  1:
 RMSU=  2.62D-07    CP:  1.00D+00  1.05D+00
 E= -3263.12404433108     Delta-E=       -0.000000001961 Rises=F Damp=F
 DIIS: error= 1.43D-06 at cycle   3 NSaved=   3.
 NSaved= 3 IEnMin= 3 EnMin= -3263.12404433108     IErMin= 3 ErrMin= 1.43D-06
 ErrMax= 1.43D-06  0.00D+00 EMaxC= 1.00D-01 BMatC= 2.25D-09 BMatP= 3.98D-09
 IDIUse=1 WtCom= 1.00D+00 WtEn= 0.00D+00
 Coeff-Com: -0.347D-01 0.513D+00 0.522D+00
 Coeff:     -0.347D-01 0.513D+00 0.522D+00
 Gap=     0.112 Goal=   None    Shift=    0.000
 Gap=     0.133 Goal=   None    Shift=    0.000
 RMSDP=1.72D-07 MaxDP=6.84D-06 DE=-1.96D-09 OVMax= 9.68D-06

 Cycle   4  Pass 1  IDiag  1:
 RMSU=  1.40D-07    CP:  1.00D+00  1.05D+00  6.33D-01
 E= -3263.12404433139     Delta-E=       -0.000000000303 Rises=F Damp=F
 DIIS: error= 8.19D-07 at cycle   4 NSaved=   4.
 NSaved= 4 IEnMin= 4 EnMin= -3263.12404433139     IErMin= 4 ErrMin= 8.19D-07
 ErrMax= 8.19D-07  0.00D+00 EMaxC= 1.00D-01 BMatC= 5.88D-10 BMatP= 2.25D-09
 IDIUse=1 WtCom= 1.00D+00 WtEn= 0.00D+00
 Coeff-Com: -0.969D-02 0.912D-01 0.333D+00 0.586D+00
 Coeff:     -0.969D-02 0.912D-01 0.333D+00 0.586D+00
 Gap=     0.112 Goal=   None    Shift=    0.000
 Gap=     0.133 Goal=   None    Shift=    0.000
 RMSDP=7.58D-08 MaxDP=3.07D-06 DE=-3.03D-10 OVMax= 4.52D-06

 Cycle   5  Pass 1  IDiag  1:
 RMSU=  3.04D-08    CP:  1.00D+00  1.05D+00  8.01D-01  6.29D-01
 E= -3263.12404433147     Delta-E=       -0.000000000085 Rises=F Damp=F
 DIIS: error= 2.25D-07 at cycle   5 NSaved=   5.
 NSaved= 5 IEnMin= 5 EnMin= -3263.12404433147     IErMin= 5 ErrMin= 2.25D-07
 ErrMax= 2.25D-07  0.00D+00 EMaxC= 1.00D-01 BMatC= 4.49D-11 BMatP= 5.88D-10
 IDIUse=1 WtCom= 1.00D+00 WtEn= 0.00D+00
 Coeff-Com:  0.198D-03-0.230D-01 0.743D-01 0.268D+00 0.680D+00
 Coeff:      0.198D-03-0.230D-01 0.743D-01 0.268D+00 0.680D+00
 Gap=     0.112 Goal=   None    Shift=    0.000
 Gap=     0.133 Goal=   None    Shift=    0.000
 RMSDP=2.29D-08 MaxDP=1.02D-06 DE=-8.55D-11 OVMax= 1.71D-06

 Cycle   6  Pass 1  IDiag  1:
 RMSU=  1.31D-08    CP:  1.00D+00  1.05D+00  7.85D-01  7.41D-01  7.39D-01
 E= -3263.12404433154     Delta-E=       -0.000000000065 Rises=F Damp=F
 DIIS: error= 1.69D-07 at cycle   6 NSaved=   6.
 NSaved= 6 IEnMin= 6 EnMin= -3263.12404433154     IErMin= 6 ErrMin= 1.69D-07
 ErrMax= 1.69D-07  0.00D+00 EMaxC= 1.00D-01 BMatC= 1.93D-11 BMatP= 4.49D-11
 IDIUse=1 WtCom= 1.00D+00 WtEn= 0.00D+00
 Coeff-Com:  0.139D-02-0.257D-01 0.553D-02 0.973D-01 0.452D+00 0.470D+00
 Coeff:      0.139D-02-0.257D-01 0.553D-02 0.973D-01 0.452D+00 0.470D+00
 Gap=     0.112 Goal=   None    Shift=    0.000
 Gap=     0.133 Goal=   None    Shift=    0.000
 RMSDP=9.22D-09 MaxDP=3.70D-07 DE=-6.55D-11 OVMax= 7.28D-07

 Error on total polarization charges =  0.01434
 SCF Done:  E(UB3LYP) =  -3263.12404433     A.U. after    6 cycles
            NFock=  6  Conv=0.92D-08     -V/T= 2.0017
 <Sx>= 0.0000 <Sy>= 0.0000 <Sz>= 0.5000 <S**2>= 0.7729 S= 0.5114
 <L.S>= 0.000000000000E+00
 KE= 3.257438342192D+03 PE=-1.054437448044D+04 EE= 2.630788662812D+03
 Annihilation of the first spin contaminant:
 S**2 before annihilation     0.7729,   after     0.7504
 Leave Link  502 at Thu Jan 09 23:45:01 2020, MaxMem=   134217728 cpu:       481.0
 (Enter E:\Gaussian\G09W\l701.exe)
 Compute integral first derivatives.
 ... and contract with generalized density number  0.
 R6Disp: Adding Grimme-D3(BJ) dispersion energy 1st derivatives to the gradient.
 D1PCM: PCM CHGder 1st derivatives, ID1Alg=3 FixD1E=F DoIter=F DoCFld=F I1PDM=0.
 GePol: Maximum number of non-zero 1st derivatives   =     349
 Leave Link  701 at Thu Jan 09 23:45:23 2020, MaxMem=   134217728 cpu:        21.0
 (Enter E:\Gaussian\G09W\l702.exe)
 L702 exits ... SP integral derivatives will be done elsewhere.
 Leave Link  702 at Thu Jan 09 23:45:23 2020, MaxMem=   134217728 cpu:         0.0
 (Enter E:\Gaussian\G09W\l703.exe)
 Compute integral first derivatives, UseDBF=F ICtDFT=           0.
 Integral derivatives from FoFJK, PRISM(SPDF).
 Calling FoFJK, ICntrl=      2127 FMM=F ISym2X=0 I1Cent= 0 IOpClX= 1 NMat=1 NMatS=1 NMatT=0.
 FoFJK:  IHMeth= 1 ICntrl=    2127 DoSepK=F KAlg= 0 I1Cent=   0 FoldK=F
 IRaf=         0 NMat=   1 IRICut=       1 DoRegI=T DoRafI=F ISym2E= 0.
 FoFCou: FMM=F IPFlag=           0 FMFlag=      100000 FMFlg1=         800
         NFxFlg=           0 DoJE=F BraDBF=F KetDBF=F FulRan=T
         wScrn=  0.000000 ICntrl=    2127 IOpCl=  1 I1Cent=           0 NGrid=           0
         NMat0=    1 NMatS0=      1 NMatT0=    0 NMatD0=    1 NMtDS0=    0 NMtDT0=    0
 Symmetry not used in FoFCou.
 Leave Link  703 at Thu Jan 09 23:48:55 2020, MaxMem=   134217728 cpu:       211.0
 (Enter E:\Gaussian\G09W\l716.exe)
 Dipole        =-1.29541183D+00-2.20574055D+00 6.64768657D-05
 ***** Axes restored to original set *****
 -------------------------------------------------------------------
 Center     Atomic                   Forces (Hartrees/Bohr)
 Number     Number              X              Y              Z
 -------------------------------------------------------------------
      1        6           0.000000887   -0.000015479   -0.000000345
      2        6           0.000009360   -0.000011780    0.000000144
      3        6          -0.000002456    0.000010714    0.000000265
      4        6          -0.000002947   -0.000016380   -0.000000573
      5        6          -0.000007578   -0.000001882    0.000000437
      6        6          -0.000002956   -0.000007024    0.000000082
      7        1           0.000000901   -0.000013018    0.000000269
      8        1           0.000001214   -0.000007426   -0.000000189
      9        1          -0.000008684   -0.000006519   -0.000000401
     10        1          -0.000005655   -0.000012229   -0.000000079
     11        6          -0.000002756    0.000001867   -0.000000189
     12        6           0.000000840   -0.000020016   -0.000000419
     13        6          -0.000009497   -0.000000240    0.000000324
     14        6           0.000011890    0.000017509    0.000000085
     15        6           0.000006947    0.000006991    0.000000031
     16        6          -0.000001454    0.000004081    0.000000047
     17        6          -0.000005659    0.000015779    0.000000086
     18        1          -0.000005022    0.000009039    0.000000055
     19        6           0.000006824    0.000007269   -0.000000238
     20        1           0.000012955    0.000004993   -0.000000095
     21        1           0.000005762    0.000011336    0.000000133
     22       35          -0.000001353    0.000015854   -0.000000014
     23        8           0.000009283    0.000009078    0.000000296
     24        8          -0.000001175   -0.000000589   -0.000000372
     25        1          -0.000009673   -0.000001928    0.000000659
 -------------------------------------------------------------------
 Cartesian Forces:  Max     0.000020016 RMS     0.000007249
 Leave Link  716 at Thu Jan 09 23:48:55 2020, MaxMem=   134217728 cpu:         0.0
 (Enter E:\Gaussian\G09W\l103.exe)

 GradGradGradGradGradGradGradGradGradGradGradGradGradGradGradGradGradGrad
 Berny optimization.
 Using GEDIIS/GDIIS optimizer.
 FormGI is forming the generalized inverse of G from B-inverse, IUseBI=4.
 Internal  Forces:  Max     0.000010787 RMS     0.000002173
 Search for a local minimum.
 Step number   8 out of a maximum of  146
 All quantities printed in internal units (Hartrees-Bohrs-Radians)
 RMS Force = .21726D-05 SwitMx=.10000D-02 MixMth= 2
 Mixed Optimization -- En-DIIS/RFO-DIIS
 Swapping is turned off.
 Update second derivatives using D2CorX and points    1    2    3    4    5
                                                      6    7    8
 DE= -1.95D-08 DEPred=-1.11D-08 R= 1.76D+00
 Trust test= 1.76D+00 RLast= 1.75D-03 DXMaxT set to 1.50D-01
 ITU=  0  0  0  1 -1  1  1  0
     Eigenvalues ---    0.00425   0.01259   0.01624   0.01692   0.01723
     Eigenvalues ---    0.01763   0.01819   0.01857   0.01873   0.02051
     Eigenvalues ---    0.02070   0.02088   0.02102   0.02132   0.02153
     Eigenvalues ---    0.02169   0.02184   0.02188   0.02201   0.02233
     Eigenvalues ---    0.02260   0.04231   0.13612   0.15952   0.16000
     Eigenvalues ---    0.16000   0.16003   0.16049   0.16109   0.16970
     Eigenvalues ---    0.17781   0.21477   0.22200   0.22697   0.23060
     Eigenvalues ---    0.23907   0.24581   0.24775   0.24988   0.25000
     Eigenvalues ---    0.25062   0.25186   0.30053   0.33183   0.34660
     Eigenvalues ---    0.35437   0.35482   0.35536   0.35599   0.35702
     Eigenvalues ---    0.35760   0.36014   0.37668   0.39415   0.40783
     Eigenvalues ---    0.40887   0.41328   0.43365   0.43546   0.44471
     Eigenvalues ---    0.45612   0.46994   0.47263   0.48172   0.48634
     Eigenvalues ---    0.50288   0.54493   0.56475   0.76934
 En-DIIS/RFO-DIIS IScMMF=        0 using points:     8    7    6    5    4
 RFO step:  Lambda= 0.00000000D+00.
 NNeg= 0 NP= 5 Switch=  2.50D-03 Rises=F DC=  9.74D-07 SmlDif=  1.00D-05
 RMS Error=  0.4100256727D-05 NUsed= 5 EDIIS=F
 DidBck=F Rises=F RFO-DIIS coefs:    1.17163   -0.14118   -0.12404    0.08676    0.00683
 Iteration  1 RMS(Cart)=  0.00003699 RMS(Int)=  0.00000000
 Iteration  2 RMS(Cart)=  0.00000000 RMS(Int)=  0.00000000
 ITry= 1 IFail=0 DXMaxC= 3.19D-04 DCOld= 1.00D+10 DXMaxT= 1.50D-01 DXLimC= 3.00D+00 Rises=F
 Variable       Old X    -DE/DX   Delta X   Delta X   Delta X     New X
                                 (Linear)    (Quad)   (Total)
    R1        2.61488   0.00000   0.00000   0.00000   0.00000   2.61488
    R2        2.65433   0.00000   0.00000   0.00000  -0.00001   2.65432
    R3        2.04810   0.00000   0.00000   0.00000   0.00000   2.04810
    R4        2.64643   0.00000   0.00001  -0.00001   0.00000   2.64643
    R5        2.04653   0.00000   0.00000   0.00000   0.00000   2.04653
    R6        2.69450   0.00001   0.00001   0.00001   0.00002   2.69452
    R7        2.78198   0.00000   0.00001  -0.00003  -0.00002   2.78196
    R8        2.67736   0.00000   0.00000  -0.00001  -0.00001   2.67735
    R9        2.69419   0.00000   0.00000  -0.00001  -0.00001   2.69418
   R10        2.60733   0.00000   0.00000   0.00000   0.00000   2.60734
   R11        2.05025   0.00000   0.00000   0.00000   0.00000   2.05025
   R12        2.04840   0.00000   0.00000   0.00000   0.00000   2.04840
   R13        2.69225   0.00001   0.00001   0.00001   0.00001   2.69226
   R14        2.54604   0.00000   0.00000   0.00000   0.00000   2.54604
   R15        2.77706  -0.00001   0.00001  -0.00003  -0.00002   2.77704
   R16        2.33985   0.00001   0.00000   0.00002   0.00002   2.33986
   R17        2.68334   0.00001   0.00001   0.00001   0.00002   2.68336
   R18        2.67457   0.00000   0.00000  -0.00001  -0.00001   2.67455
   R19        2.64726   0.00000   0.00001  -0.00001   0.00000   2.64726
   R20        2.60176   0.00001   0.00001   0.00001   0.00001   2.60177
   R21        2.04189   0.00000   0.00000   0.00000   0.00000   2.04189
   R22        2.61280   0.00000   0.00001  -0.00001   0.00000   2.61280
   R23        2.04634   0.00000   0.00000   0.00000   0.00000   2.04634
   R24        2.65349   0.00000   0.00000   0.00000  -0.00001   2.65348
   R25        3.62374   0.00000   0.00001  -0.00001   0.00000   3.62374
   R26        2.04505   0.00000   0.00000   0.00000   0.00000   2.04505
   R27        1.82282   0.00000   0.00000   0.00000   0.00000   1.82282
    A1        2.08883   0.00000   0.00000   0.00000   0.00000   2.08883
    A2        2.09922   0.00000   0.00000  -0.00001  -0.00001   2.09921
    A3        2.09514   0.00000   0.00000   0.00001   0.00001   2.09515
    A4        2.11339   0.00000   0.00001   0.00000   0.00001   2.11339
    A5        2.11324   0.00000   0.00001   0.00002   0.00003   2.11327
    A6        2.05656  -0.00001  -0.00002  -0.00002  -0.00003   2.05652
    A7        2.08712   0.00000  -0.00001   0.00000  -0.00001   2.08711
    A8        2.07578   0.00000   0.00001   0.00000   0.00001   2.07579
    A9        2.12028   0.00000   0.00000   0.00000   0.00000   2.12028
   A10        2.06448   0.00000   0.00000   0.00000   0.00000   2.06448
   A11        2.08113   0.00000   0.00000   0.00000   0.00000   2.08112
   A12        2.13758   0.00000   0.00000   0.00001   0.00001   2.13758
   A13        2.11053   0.00000   0.00000   0.00000   0.00001   2.11054
   A14        2.11575   0.00000  -0.00001   0.00000   0.00000   2.11575
   A15        2.05691   0.00000   0.00000   0.00000   0.00000   2.05690
   A16        2.10202   0.00000   0.00000   0.00000   0.00000   2.10202
   A17        2.09452   0.00000   0.00000   0.00000   0.00000   2.09452
   A18        2.08665   0.00000   0.00000   0.00000   0.00000   2.08665
   A19        2.12060   0.00000   0.00000   0.00000   0.00000   2.12059
   A20        2.14496  -0.00001  -0.00001  -0.00001  -0.00002   2.14494
   A21        2.01763   0.00001   0.00001   0.00001   0.00002   2.01765
   A22        2.03667   0.00000   0.00000   0.00001   0.00001   2.03668
   A23        2.12402   0.00000   0.00000   0.00000   0.00000   2.12402
   A24        2.12249   0.00000   0.00000  -0.00001  -0.00001   2.12248
   A25        2.09352   0.00000   0.00000   0.00000   0.00000   2.09352
   A26        2.10751   0.00000   0.00000   0.00000   0.00000   2.10752
   A27        2.08215   0.00000   0.00000   0.00000   0.00000   2.08215
   A28        2.11417   0.00000   0.00000   0.00000   0.00000   2.11417
   A29        2.08630   0.00000   0.00001   0.00000   0.00001   2.08631
   A30        2.08271   0.00000  -0.00001   0.00000  -0.00001   2.08271
   A31        2.08192   0.00000   0.00001   0.00000   0.00001   2.08193
   A32        2.08839   0.00000   0.00000   0.00000   0.00000   2.08838
   A33        2.11287   0.00000   0.00000   0.00000   0.00000   2.11287
   A34        2.11794   0.00000   0.00001   0.00000   0.00001   2.11794
   A35        2.06332   0.00000  -0.00002  -0.00001  -0.00003   2.06330
   A36        2.10192   0.00000   0.00001   0.00001   0.00002   2.10195
   A37        2.13162   0.00000   0.00000   0.00000  -0.00001   2.13161
   A38        2.08048   0.00000   0.00000   0.00000   0.00000   2.08049
   A39        2.07108   0.00000   0.00000   0.00000   0.00000   2.07109
   A40        2.07002   0.00000   0.00000   0.00000   0.00000   2.07003
   A41        2.10944   0.00000   0.00001   0.00000   0.00000   2.10944
   A42        2.10372   0.00000  -0.00001   0.00000  -0.00001   2.10372
   A43        1.95616   0.00000   0.00001   0.00001   0.00002   1.95617
    D1       -0.00001   0.00000   0.00001   0.00000   0.00001   0.00000
    D2        3.14158   0.00000   0.00001   0.00000   0.00001  -3.14159
    D3        3.14159   0.00000   0.00000   0.00000   0.00001   3.14159
    D4       -0.00001   0.00000   0.00001   0.00000   0.00001   0.00000
    D5        0.00001   0.00000  -0.00001   0.00000  -0.00001   0.00000
    D6       -3.14158   0.00000  -0.00002   0.00000  -0.00001   3.14159
    D7       -3.14159   0.00000   0.00000   0.00000  -0.00001  -3.14159
    D8        0.00001   0.00000  -0.00001   0.00000  -0.00001   0.00000
    D9        0.00000   0.00000   0.00000   0.00000   0.00000   0.00000
   D10        3.14158   0.00000   0.00001   0.00000   0.00001  -3.14159
   D11       -3.14159   0.00000   0.00000   0.00000   0.00000   3.14159
   D12        0.00000   0.00000   0.00001   0.00000   0.00001   0.00000
   D13        0.00001   0.00000  -0.00002   0.00000  -0.00001   0.00000
   D14       -3.14157   0.00000  -0.00001   0.00000  -0.00002  -3.14159
   D15       -3.14157   0.00000  -0.00003   0.00000  -0.00002   3.14159
   D16        0.00002   0.00000  -0.00002   0.00000  -0.00003   0.00000
   D17       -3.14159   0.00000  -0.00001   0.00000  -0.00001  -3.14159
   D18        0.00001   0.00000  -0.00001   0.00000  -0.00001   0.00000
   D19        0.00000   0.00000   0.00000   0.00000   0.00000   0.00000
   D20       -3.14159   0.00000   0.00000   0.00000   0.00000  -3.14159
   D21       -0.00001   0.00000   0.00002   0.00000   0.00001   0.00000
   D22        3.14155   0.00000   0.00004   0.00000   0.00004  -3.14159
   D23        3.14157   0.00000   0.00001   0.00000   0.00002   3.14159
   D24       -0.00004   0.00000   0.00004   0.00001   0.00004   0.00000
   D25       -0.00003   0.00000   0.00003   0.00000   0.00003   0.00000
   D26        3.14157   0.00000   0.00000   0.00002   0.00002   3.14159
   D27        3.14156   0.00000   0.00003   0.00000   0.00003   3.14159
   D28       -0.00002   0.00000   0.00000   0.00001   0.00002   0.00000
   D29        0.00000   0.00000   0.00000   0.00000   0.00000   0.00000
   D30        3.14159   0.00000   0.00000   0.00000   0.00000   3.14159
   D31       -3.14157   0.00000  -0.00003   0.00000  -0.00003   3.14159
   D32        0.00002   0.00000  -0.00002   0.00000  -0.00002   0.00000
   D33        0.00001   0.00000  -0.00001   0.00000  -0.00001   0.00000
   D34       -3.14158   0.00000  -0.00001   0.00000  -0.00001  -3.14159
   D35       -3.14158   0.00000   0.00001  -0.00002   0.00000  -3.14159
   D36        0.00000   0.00000   0.00002  -0.00002   0.00000   0.00000
   D37       -0.00014   0.00000   0.00021  -0.00002   0.00019   0.00005
   D38        3.14146   0.00000   0.00018  -0.00001   0.00018  -3.14155
   D39       -0.00002   0.00000   0.00001   0.00001   0.00002   0.00000
   D40        3.14158   0.00000   0.00000   0.00000   0.00001   3.14159
   D41        3.14157   0.00000   0.00002   0.00000   0.00002   3.14159
   D42       -0.00001   0.00000   0.00001   0.00000   0.00001   0.00000
   D43        0.00001   0.00000  -0.00001   0.00000  -0.00001   0.00000
   D44       -3.14159   0.00000   0.00000   0.00000   0.00000   3.14159
   D45       -3.14158   0.00000  -0.00001  -0.00001  -0.00002   3.14159
   D46        0.00001   0.00000   0.00000   0.00000  -0.00001   0.00000
   D47        3.14159   0.00000   0.00000   0.00000   0.00000  -3.14159
   D48        0.00000   0.00000   0.00000   0.00000   0.00000   0.00000
   D49       -0.00001   0.00000   0.00001   0.00000   0.00001   0.00000
   D50        3.14159   0.00000   0.00001   0.00000   0.00001  -3.14159
   D51        3.14158   0.00000   0.00001   0.00000   0.00001  -3.14159
   D52       -0.00001   0.00000   0.00001   0.00000   0.00001   0.00000
   D53        0.00000   0.00000   0.00000   0.00000   0.00000   0.00000
   D54        3.14159   0.00000   0.00000   0.00000   0.00000   3.14159
   D55        0.00000   0.00000   0.00000   0.00000   0.00000   0.00000
   D56       -3.14159   0.00000   0.00000   0.00000   0.00000   3.14159
   D57       -3.14159   0.00000   0.00000   0.00000   0.00000   3.14159
   D58        0.00000   0.00000   0.00000   0.00000   0.00000   0.00000
   D59        0.00000   0.00000   0.00000   0.00000   0.00000   0.00000
   D60       -3.14159   0.00000   0.00000   0.00000   0.00000   3.14159
   D61        3.14159   0.00000   0.00000   0.00000   0.00001  -3.14159
   D62        0.00000   0.00000   0.00000   0.00000   0.00000   0.00000
   D63        0.00000   0.00000   0.00000   0.00000   0.00000   0.00000
   D64        3.14159   0.00000   0.00000   0.00000   0.00000  -3.14159
   D65       -3.14159   0.00000   0.00000   0.00000   0.00000   3.14159
   D66        0.00000   0.00000   0.00000   0.00000   0.00000   0.00000
         Item               Value     Threshold  Converged?
 Maximum Force            0.000011     0.000450     YES
 RMS     Force            0.000002     0.000300     YES
 Maximum Displacement     0.000319     0.001800     YES
 RMS     Displacement     0.000037     0.001200     YES
 Predicted change in Energy=-1.140128D-09
 Optimization completed.
    -- Stationary point found.
                           ----------------------------
                           !   Optimized Parameters   !
                           ! (Angstroms and Degrees)  !
 --------------------------                            --------------------------
 ! Name  Definition              Value          Derivative Info.                !
 --------------------------------------------------------------------------------
 ! R1    R(1,2)                  1.3837         -DE/DX =    0.0                 !
 ! R2    R(1,6)                  1.4046         -DE/DX =    0.0                 !
 ! R3    R(1,7)                  1.0838         -DE/DX =    0.0                 !
 ! R4    R(2,3)                  1.4004         -DE/DX =    0.0                 !
 ! R5    R(2,8)                  1.083          -DE/DX =    0.0                 !
 ! R6    R(3,4)                  1.4259         -DE/DX =    0.0                 !
 ! R7    R(3,12)                 1.4722         -DE/DX =    0.0                 !
 ! R8    R(4,5)                  1.4168         -DE/DX =    0.0                 !
 ! R9    R(4,11)                 1.4257         -DE/DX =    0.0                 !
 ! R10   R(5,6)                  1.3797         -DE/DX =    0.0                 !
 ! R11   R(5,9)                  1.0849         -DE/DX =    0.0                 !
 ! R12   R(6,10)                 1.084          -DE/DX =    0.0                 !
 ! R13   R(11,13)                1.4247         -DE/DX =    0.0                 !
 ! R14   R(11,24)                1.3473         -DE/DX =    0.0                 !
 ! R15   R(12,14)                1.4696         -DE/DX =    0.0                 !
 ! R16   R(12,23)                1.2382         -DE/DX =    0.0                 !
 ! R17   R(13,14)                1.42           -DE/DX =    0.0                 !
 ! R18   R(13,15)                1.4153         -DE/DX =    0.0                 !
 ! R19   R(14,16)                1.4009         -DE/DX =    0.0                 !
 ! R20   R(15,17)                1.3768         -DE/DX =    0.0                 !
 ! R21   R(15,18)                1.0805         -DE/DX =    0.0                 !
 ! R22   R(16,19)                1.3826         -DE/DX =    0.0                 !
 ! R23   R(16,20)                1.0829         -DE/DX =    0.0                 !
 ! R24   R(17,19)                1.4042         -DE/DX =    0.0                 !
 ! R25   R(17,22)                1.9176         -DE/DX =    0.0                 !
 ! R26   R(19,21)                1.0822         -DE/DX =    0.0                 !
 ! R27   R(24,25)                0.9646         -DE/DX =    0.0                 !
 ! A1    A(2,1,6)              119.6813         -DE/DX =    0.0                 !
 ! A2    A(2,1,7)              120.2762         -DE/DX =    0.0                 !
 ! A3    A(6,1,7)              120.0426         -DE/DX =    0.0                 !
 ! A4    A(1,2,3)              121.0881         -DE/DX =    0.0                 !
 ! A5    A(1,2,8)              121.08           -DE/DX =    0.0                 !
 ! A6    A(3,2,8)              117.8319         -DE/DX =    0.0                 !
 ! A7    A(2,3,4)              119.5834         -DE/DX =    0.0                 !
 ! A8    A(2,3,12)             118.9337         -DE/DX =    0.0                 !
 ! A9    A(4,3,12)             121.483          -DE/DX =    0.0                 !
 ! A10   A(3,4,5)              118.2861         -DE/DX =    0.0                 !
 ! A11   A(3,4,11)             119.2398         -DE/DX =    0.0                 !
 ! A12   A(5,4,11)             122.4741         -DE/DX =    0.0                 !
 ! A13   A(4,5,6)              120.9244         -DE/DX =    0.0                 !
 ! A14   A(4,5,9)              121.2236         -DE/DX =    0.0                 !
 ! A15   A(6,5,9)              117.852          -DE/DX =    0.0                 !
 ! A16   A(1,6,5)              120.4368         -DE/DX =    0.0                 !
 ! A17   A(1,6,10)             120.0071         -DE/DX =    0.0                 !
 ! A18   A(5,6,10)             119.5561         -DE/DX =    0.0                 !
 ! A19   A(4,11,13)            121.5012         -DE/DX =    0.0                 !
 ! A20   A(4,11,24)            122.8969         -DE/DX =    0.0                 !
 ! A21   A(13,11,24)           115.6019         -DE/DX =    0.0                 !
 ! A22   A(3,12,14)            116.6928         -DE/DX =    0.0                 !
 ! A23   A(3,12,23)            121.6972         -DE/DX =    0.0                 !
 ! A24   A(14,12,23)           121.61           -DE/DX =    0.0                 !
 ! A25   A(11,13,14)           119.95           -DE/DX =    0.0                 !
 ! A26   A(11,13,15)           120.7516         -DE/DX =    0.0                 !
 ! A27   A(14,13,15)           119.2983         -DE/DX =    0.0                 !
 ! A28   A(12,14,13)           121.1332         -DE/DX =    0.0                 !
 ! A29   A(12,14,16)           119.5361         -DE/DX =    0.0                 !
 ! A30   A(13,14,16)           119.3307         -DE/DX =    0.0                 !
 ! A31   A(13,15,17)           119.2855         -DE/DX =    0.0                 !
 ! A32   A(13,15,18)           119.6557         -DE/DX =    0.0                 !
 ! A33   A(17,15,18)           121.0588         -DE/DX =    0.0                 !
 ! A34   A(14,16,19)           121.3489         -DE/DX =    0.0                 !
 ! A35   A(14,16,20)           118.2198         -DE/DX =    0.0                 !
 ! A36   A(19,16,20)           120.4313         -DE/DX =    0.0                 !
 ! A37   A(15,17,19)           122.1329         -DE/DX =    0.0                 !
 ! A38   A(15,17,22)           119.2028         -DE/DX =    0.0                 !
 ! A39   A(19,17,22)           118.6643         -DE/DX =    0.0                 !
 ! A40   A(16,19,17)           118.6036         -DE/DX =    0.0                 !
 ! A41   A(16,19,21)           120.8618         -DE/DX =    0.0                 !
 ! A42   A(17,19,21)           120.5345         -DE/DX =    0.0                 !
 ! A43   A(11,24,25)           112.0795         -DE/DX =    0.0                 !
 ! D1    D(6,1,2,3)             -0.0005         -DE/DX =    0.0                 !
 ! D2    D(6,1,2,8)           -180.0007         -DE/DX =    0.0                 !
 ! D3    D(7,1,2,3)            179.9996         -DE/DX =    0.0                 !
 ! D4    D(7,1,2,8)             -0.0006         -DE/DX =    0.0                 !
 ! D5    D(2,1,6,5)              0.0005         -DE/DX =    0.0                 !
 ! D6    D(2,1,6,10)           180.0008         -DE/DX =    0.0                 !
 ! D7    D(7,1,6,5)           -179.9996         -DE/DX =    0.0                 !
 ! D8    D(7,1,6,10)             0.0007         -DE/DX =    0.0                 !
 ! D9    D(1,2,3,4)             -0.0001         -DE/DX =    0.0                 !
 ! D10   D(1,2,3,12)          -180.0005         -DE/DX =    0.0                 !
 ! D11   D(8,2,3,4)            180.0001         -DE/DX =    0.0                 !
 ! D12   D(8,2,3,12)            -0.0003         -DE/DX =    0.0                 !
 ! D13   D(2,3,4,5)              0.0008         -DE/DX =    0.0                 !
 ! D14   D(2,3,4,11)          -179.999          -DE/DX =    0.0                 !
 ! D15   D(12,3,4,5)           180.0012         -DE/DX =    0.0                 !
 ! D16   D(12,3,4,11)            0.0014         -DE/DX =    0.0                 !
 ! D17   D(2,3,12,14)         -179.9996         -DE/DX =    0.0                 !
 ! D18   D(2,3,12,23)            0.0005         -DE/DX =    0.0                 !
 ! D19   D(4,3,12,14)            0.0001         -DE/DX =    0.0                 !
 ! D20   D(4,3,12,23)         -179.9999         -DE/DX =    0.0                 !
 ! D21   D(3,4,5,6)             -0.0008         -DE/DX =    0.0                 !
 ! D22   D(3,4,5,9)           -180.0022         -DE/DX =    0.0                 !
 ! D23   D(11,4,5,6)           179.9989         -DE/DX =    0.0                 !
 ! D24   D(11,4,5,9)            -0.0025         -DE/DX =    0.0                 !
 ! D25   D(3,4,11,13)           -0.0019         -DE/DX =    0.0                 !
 ! D26   D(3,4,11,24)          179.9985         -DE/DX =    0.0                 !
 ! D27   D(5,4,11,13)          179.9984         -DE/DX =    0.0                 !
 ! D28   D(5,4,11,24)           -0.0012         -DE/DX =    0.0                 !
 ! D29   D(4,5,6,1)              0.0002         -DE/DX =    0.0                 !
 ! D30   D(4,5,6,10)           179.9998         -DE/DX =    0.0                 !
 ! D31   D(9,5,6,1)            180.0016         -DE/DX =    0.0                 !
 ! D32   D(9,5,6,10)             0.0012         -DE/DX =    0.0                 !
 ! D33   D(4,11,13,14)           0.0008         -DE/DX =    0.0                 !
 ! D34   D(4,11,13,15)        -179.9994         -DE/DX =    0.0                 !
 ! D35   D(24,11,13,14)       -179.9995         -DE/DX =    0.0                 !
 ! D36   D(24,11,13,15)          0.0002         -DE/DX =    0.0                 !
 ! D37   D(4,11,24,25)          -0.0079         -DE/DX =    0.0                 !
 ! D38   D(13,11,24,25)       -180.0076         -DE/DX =    0.0                 !
 ! D39   D(3,12,14,13)          -0.0011         -DE/DX =    0.0                 !
 ! D40   D(3,12,14,16)         179.9994         -DE/DX =    0.0                 !
 ! D41   D(23,12,14,13)        179.9988         -DE/DX =    0.0                 !
[truncated: 62,260 more chars]
