# Supplementary material for: 2-Bromoanthraquinone as a highly efficient photocatalyst for the oxidation of sec-aromatic alcohols: experimental and DFT study
Source: Royal Society of Chemistry journal article supplement (doi:10.1039/d0ra06414a), 2020-01-01
Supplement: d0ra06414a6.out [file d0ra06414a6.out]

 Entering Link 1 = C:\software\gaussian\G09W\l1.exe PID=      7420.
  
 Copyright (c) 1988,1990,1992,1993,1995,1998,2003,2009,2013,
            Gaussian, Inc.  All Rights Reserved.
  
 This is part of the Gaussian(R) 09 program.  It is based on
 the Gaussian(R) 03 system (copyright 2003, Gaussian, Inc.),
 the Gaussian(R) 98 system (copyright 1998, Gaussian, Inc.),
 the Gaussian(R) 94 system (copyright 1995, Gaussian, Inc.),
 the Gaussian 92(TM) system (copyright 1992, Gaussian, Inc.),
 the Gaussian 90(TM) system (copyright 1990, Gaussian, Inc.),
 the Gaussian 88(TM) system (copyright 1988, Gaussian, Inc.),
 the Gaussian 86(TM) system (copyright 1986, Carnegie Mellon
 University), and the Gaussian 82(TM) system (copyright 1983,
 Carnegie Mellon University). Gaussian is a federally registered
 trademark of Gaussian, Inc.
  
 This software contains proprietary and confidential information,
 including trade secrets, belonging to Gaussian, Inc.
  
 This software is provided under written license and may be
 used, copied, transmitted, or stored only in accord with that
 written license.
  
 The following legend is applicable only to US Government
 contracts under FAR:
  
                    RESTRICTED RIGHTS LEGEND
  
 Use, reproduction and disclosure by the US Government is
 subject to restrictions as set forth in subparagraphs (a)
 and (c) of the Commercial Computer Software - Restricted
 Rights clause in FAR 52.227-19.
  
 Gaussian, Inc.
 340 Quinnipiac St., Bldg. 40, Wallingford CT 06492
  
  
 ---------------------------------------------------------------
 Warning -- This program may not be used in any manner that
 competes with the business of Gaussian, Inc. or will provide
 assistance to any competitor of Gaussian, Inc.  The licensee
 of this program is prohibited from giving any competitor of
 Gaussian, Inc. access to this program.  By using this program,
 the user acknowledges that Gaussian, Inc. is engaged in the
 business of creating and licensing software in the field of
 computational chemistry and represents and warrants to the
 licensee that it is not a competitor of Gaussian, Inc. and that
 it will not use this program in any manner prohibited above.
 ---------------------------------------------------------------
  

 Cite this work as:
 Gaussian 09, Revision D.01,
 M. J. Frisch, G. W. Trucks, H. B. Schlegel, G. E. Scuseria, 
 M. A. Robb, J. R. Cheeseman, G. Scalmani, V. Barone, B. Mennucci, 
 G. A. Petersson, H. Nakatsuji, M. Caricato, X. Li, H. P. Hratchian, 
 A. F. Izmaylov, J. Bloino, G. Zheng, J. L. Sonnenberg, M. Hada, 
 M. Ehara, K. Toyota, R. Fukuda, J. Hasegawa, M. Ishida, T. Nakajima, 
 Y. Honda, O. Kitao, H. Nakai, T. Vreven, J. A. Montgomery, Jr., 
 J. E. Peralta, F. Ogliaro, M. Bearpark, J. J. Heyd, E. Brothers, 
 K. N. Kudin, V. N. Staroverov, T. Keith, R. Kobayashi, J. Normand, 
 K. Raghavachari, A. Rendell, J. C. Burant, S. S. Iyengar, J. Tomasi, 
 M. Cossi, N. Rega, J. M. Millam, M. Klene, J. E. Knox, J. B. Cross, 
 V. Bakken, C. Adamo, J. Jaramillo, R. Gomperts, R. E. Stratmann, 
 O. Yazyev, A. J. Austin, R. Cammi, C. Pomelli, J. W. Ochterski, 
 R. L. Martin, K. Morokuma, V. G. Zakrzewski, G. A. Voth, 
 P. Salvador, J. J. Dannenberg, S. Dapprich, A. D. Daniels, 
 O. Farkas, J. B. Foresman, J. V. Ortiz, J. Cioslowski, 
 and D. J. Fox, Gaussian, Inc., Wallingford CT, 2013.
 
 ******************************************
 Gaussian 09:  IA32W-G09RevD.01 24-Apr-2013
                21-Jul-2020 
 ******************************************
 %nprocshared=4
 Will use up to    4 processors via shared memory.
 %mem=1500MB
 %chk=C:\Users\Shengfu Liao\Desktop\suppliment\HT2 energy.chk
 ----------------------------------------------------------------------
 # td=(triplets,nstates=5,root=1) um062x/gen scrf=(solvent=acetonitrile
 ) geom=connectivity empiricaldispersion=gd3
 ----------------------------------------------------------------------
 1/38=1,57=2/1;
 2/12=2,17=6,18=5,40=1/2;
 3/5=7,11=2,16=1,25=1,30=1,70=2201,72=2,74=-55,116=2,124=31/1,2,8,3;
 4//1;
 5/5=2,38=5,53=2/2;
 8/6=1,10=1,107=1,108=5/1;
 9/8=1,41=5,42=1,48=3,70=2/14;
 6/7=2,8=2,9=2,10=2/1;
 99/5=1,9=1/99;
 ---
 HT2
 ---
 Symbolic Z-matrix:
 Charge =  0 Multiplicity = 2
 C                     5.08693   0.02569   0.00004 
 C                     4.0353    0.95891   0.00006 
 C                     2.70913   0.51782   0.0001 
 C                     2.40929  -0.8703    0.00009 
 C                     3.46223  -1.77957   0.00008 
 C                     4.79562  -1.3277    0.00005 
 H                     6.11383   0.37044   0.00001 
 H                     4.24805   2.01957   0.00006 
 H                     3.23423  -2.83728   0.0001 
 H                     5.60121  -2.05408   0.00003 
 C                     1.01308  -1.33685   0.00013 
 O                     0.74773  -2.56091   0.0001 
 C                     1.61516   1.4546    0.00015 
 C                    -0.05767  -0.33889   0.00007 
 C                     0.23054   1.05691   0.00005 
 C                    -1.39253  -0.7545    0.00002 
 C                    -0.81193   1.98769  -0.00006 
 C                    -2.41565   0.21332  -0.00007 
 H                    -1.6144   -1.81136   0.00005 
 C                    -2.16347   1.56623  -0.00012 
 H                    -0.63314   3.05741  -0.00013 
 H                    -2.96291   2.29376  -0.0002 
 Br                   -4.22904  -0.39658  -0.00014 
 O                     1.96737   2.72032   0.00008 
 H                     1.21282   3.32664   0.00006 
 
                          Input orientation:                          
 ---------------------------------------------------------------------
 Center     Atomic      Atomic             Coordinates (Angstroms)
 Number     Number       Type             X           Y           Z
 ---------------------------------------------------------------------
      1          6           0        5.086926    0.025686    0.000035
      2          6           0        4.035299    0.958905    0.000062
      3          6           0        2.709132    0.517820    0.000097
      4          6           0        2.409285   -0.870303    0.000094
      5          6           0        3.462226   -1.779569    0.000080
      6          6           0        4.795620   -1.327702    0.000046
      7          1           0        6.113829    0.370441    0.000009
      8          1           0        4.248052    2.019567    0.000058
      9          1           0        3.234227   -2.837281    0.000096
     10          1           0        5.601207   -2.054084    0.000029
     11          6           0        1.013083   -1.336849    0.000125
     12          8           0        0.747727   -2.560914    0.000096
     13          6           0        1.615162    1.454601    0.000148
     14          6           0       -0.057670   -0.338893    0.000065
     15          6           0        0.230536    1.056914    0.000050
     16          6           0       -1.392531   -0.754504    0.000022
     17          6           0       -0.811927    1.987689   -0.000063
     18          6           0       -2.415653    0.213319   -0.000067
     19          1           0       -1.614400   -1.811361    0.000052
     20          6           0       -2.163469    1.566228   -0.000119
     21          1           0       -0.633144    3.057409   -0.000129
     22          1           0       -2.962912    2.293756   -0.000202
     23         35           0       -4.229044   -0.396581   -0.000138
     24          8           0        1.967367    2.720316    0.000079
     25          1           0        1.212823    3.326638    0.000062
 ---------------------------------------------------------------------
                    Distance matrix (angstroms):
                    1          2          3          4          5
     1  C    0.000000
     2  C    1.405993   0.000000
     3  C    2.428189   1.397596   0.000000
     4  C    2.823572   2.447432   1.420139   0.000000
     5  C    2.428702   2.797794   2.417674   1.391204   0.000000
     6  C    1.384384   2.409701   2.785567   2.429775   1.407879
     7  H    1.083229   2.160226   3.407885   3.906801   3.413728
     8  H    2.163162   1.081789   2.150237   3.425261   3.879556
     9  H    3.410143   3.879787   3.395943   2.132963   1.082007
    10  H    2.142412   3.395610   3.870244   3.404365   2.156525
    11  C    4.295660   3.795297   2.513241   1.472089   2.488836
    12  O    5.051648   4.816353   3.650440   2.370430   2.824713
    13  C    3.754323   2.470380   1.440253   2.456789   3.724446
    14  C    5.157498   4.293795   2.896403   2.523542   3.803316
    15  C    4.964671   3.806025   2.536545   2.908799   4.299937
    16  C    6.526259   5.691846   4.294467   3.803579   4.961796
    17  C    6.216584   4.955199   3.815543   4.306312   5.697422
    18  C    7.504925   6.493896   5.133823   4.945125   6.206534
    19  H    6.948562   6.292334   4.911009   4.132267   5.076726
    20  C    7.412253   6.228448   4.984115   5.181386   6.545441
    21  H    6.473835   5.118406   4.197657   4.968229   6.337855
    22  H    8.363255   7.124380   5.943571   6.234723   7.607521
    23  Br   9.325535   8.374766   6.998172   6.655210   7.814620
    24  O    4.122218   2.716415   2.324049   3.617711   4.741684
    25  H    5.089691   3.684092   3.182515   4.364153   5.579710
                    6          7          8          9         10
     6  C    0.000000
     7  H    2.149736   0.000000
     8  H    3.391761   2.490129   0.000000
     9  H    2.171814   4.310637   4.961533   0.000000
    10  H    1.084713   2.478125   4.292512   2.493189   0.000000
    11  C    3.782548   5.378889   4.661604   2.680443   4.643846
    12  O    4.231578   6.114564   5.764814   2.501812   4.879871
    13  C    4.225698   4.627462   2.692823   4.587115   5.310313
    14  C    4.952996   6.212130   4.909336   4.132618   5.913101
    15  C    5.150377   5.923207   4.131239   4.918019   6.206643
    16  C    6.214641   7.590187   6.285829   5.073938   7.113458
    17  C    6.514323   7.112073   5.060079   6.296959   7.580516
    18  C    7.374090   8.530929   6.904165   6.420849   8.331336
    19  H    6.428241   8.030304   7.003167   4.955976   7.219688
    20  C    7.536826   8.363227   6.427528   6.966062   8.567196
    21  H    6.978587   7.262330   4.990310   7.050101   8.061916
    22  H    8.562113   9.278274   7.216175   8.045624   9.604574
    23  Br   9.072571  10.371275   8.814700   7.852225   9.969010
    24  O    4.938164   4.766032   2.385911   5.700160   5.999974
    25  H    5.873612   5.723544   3.304701   6.486908   6.943348
                   11         12         13         14         15
    11  C    0.000000
    12  O    1.252497   0.000000
    13  C    2.855642   4.108139   0.000000
    14  C    1.463704   2.363481   2.452547   0.000000
    15  C    2.518428   3.654609   1.440605   1.425251   0.000000
    16  C    2.475097   2.800682   3.731804   1.398065   2.432197
    17  C    3.792521   4.808566   2.484943   2.445790   1.397523
    18  C    3.762878   4.207534   4.217612   2.421781   2.777403
    19  H    2.669987   2.478200   4.593101   2.142795   3.410394
    20  C    4.303294   5.050580   3.780279   2.839696   2.447583
    21  H    4.692501   5.785530   2.761136   3.444712   2.178973
    22  H    5.384220   6.110373   4.654347   3.920621   3.424600
    23  Br   5.325786   5.427024   6.130385   4.171773   4.690469
    24  O    4.167883   5.420232   1.313805   3.668724   2.404888
    25  H    4.667763   5.905894   1.914784   3.879468   2.473163
                   16         17         18         19         20
    16  C    0.000000
    17  C    2.802985   0.000000
    18  C    1.408354   2.391720   0.000000
    19  H    1.079895   3.882878   2.177461   0.000000
    20  C    2.445433   1.415731   1.376212   3.421927   0.000000
    21  H    3.886817   1.084557   3.356514   4.966667   2.136707
    22  H    3.428992   2.172651   2.151211   4.320934   1.080928
    23  Br   2.859006   4.166705   1.913208   2.972872   2.849424
    24  O    4.833559   2.874233   5.049346   5.776258   4.289024
    25  H    4.841858   2.427426   4.781066   5.864488   3.807675
                   21         22         23         24         25
    21  H    0.000000
    22  H    2.451731   0.000000
    23  Br   4.986035   2.973382   0.000000
    24  O    2.622268   4.948697   6.936177   0.000000
    25  H    1.865497   4.301582   6.593654   0.967968   0.000000
 Stoichiometry    C14H8BrO2(2)
 Framework group  C1[X(C14H8BrO2)]
 Deg. of freedom    69
 Full point group                 C1      NOp   1
 Largest Abelian subgroup         C1      NOp   1
 Largest concise Abelian subgroup C1      NOp   1
                         Standard orientation:                         
 ---------------------------------------------------------------------
 Center     Atomic      Atomic             Coordinates (Angstroms)
 Number     Number       Type             X           Y           Z
 ---------------------------------------------------------------------
      1          6           0        5.086926    0.025686    0.000035
      2          6           0        4.035299    0.958905    0.000062
      3          6           0        2.709132    0.517820    0.000097
      4          6           0        2.409285   -0.870303    0.000094
      5          6           0        3.462226   -1.779569    0.000080
      6          6           0        4.795620   -1.327702    0.000046
      7          1           0        6.113829    0.370441    0.000009
      8          1           0        4.248052    2.019567    0.000058
      9          1           0        3.234227   -2.837281    0.000096
     10          1           0        5.601207   -2.054084    0.000029
     11          6           0        1.013083   -1.336849    0.000125
     12          8           0        0.747727   -2.560914    0.000096
     13          6           0        1.615162    1.454601    0.000148
     14          6           0       -0.057670   -0.338893    0.000065
     15          6           0        0.230536    1.056914    0.000050
     16          6           0       -1.392531   -0.754504    0.000022
     17          6           0       -0.811927    1.987689   -0.000063
     18          6           0       -2.415653    0.213319   -0.000067
     19          1           0       -1.614400   -1.811361    0.000052
     20          6           0       -2.163469    1.566228   -0.000119
     21          1           0       -0.633144    3.057409   -0.000129
     22          1           0       -2.962912    2.293756   -0.000202
     23         35           0       -4.229044   -0.396581   -0.000138
     24          8           0        1.967367    2.720316    0.000079
     25          1           0        1.212823    3.326638    0.000062
 ---------------------------------------------------------------------
 Rotational constants (GHZ):      0.9922212      0.1761294      0.1495778
 General basis read from cards:  (5D, 7F)
 There are   679 symmetry adapted cartesian basis functions of A   symmetry.
 There are   592 symmetry adapted basis functions of A   symmetry.
   592 basis functions,   994 primitive gaussians,   679 cartesian basis functions
    72 alpha electrons       71 beta electrons
       nuclear repulsion energy      1392.1006901706 Hartrees.
 NAtoms=   25 NActive=   25 NUniq=   25 SFac= 1.00D+00 NAtFMM=   60 NAOKFM=F Big=F
 Integral buffers will be    262144 words long.
 Raffenetti 2 integral format.
 Two-electron integral symmetry is turned on.
 Nuclear repulsion after empirical dispersion term =     1392.0994934193 Hartrees.
 ------------------------------------------------------------------------------
 Polarizable Continuum Model (PCM)
 =================================
 Model                : PCM (using non-symmetric T matrix).
 Atomic radii         : UFF (Universal Force Field).
 Polarization charges : Total charges.
 Charge compensation  : None.
 Solution method      : On-the-fly selection.
 Cavity type          : Scaled VdW (van der Waals Surface) (Alpha=1.100).
 Cavity algorithm     : GePol (No added spheres)
                        Default sphere list used, NSphG=   25.
                        Lebedev-Laikov grids with approx.  5.0 points / Ang**2.
                        Smoothing algorithm: Karplus/York (Gamma=1.0000).
                        Polarization charges: spherical gaussians, with
                                              point-specific exponents (IZeta= 3).
                        Self-potential: point-specific (ISelfS= 7).
                        Self-field    : sphere-specific E.n sum rule (ISelfD= 2).
 Solvent              : Acetonitrile, Eps=  35.688000 Eps(inf)=   1.806874
 ------------------------------------------------------------------------------
 One-electron integrals computed using PRISM.
 NBasis=   592 RedAO= T EigKep=  5.76D-06  NBF=   592
 NBsUse=   592 1.00D-06 EigRej= -1.00D+00 NBFU=   592
 ExpMin= 9.52D-02 ExpMax= 5.65D+05 ExpMxC= 5.46D+03 IAcc=2 IRadAn=         4 AccDes= 0.00D+00
 Harris functional with IExCor= 1009 and IRadAn=       4 diagonalized for initial guess.
 HarFok:  IExCor= 1009 AccDes= 0.00D+00 IRadAn=         4 IDoV= 1 UseB2=F ITyADJ=14
 ICtDFT=  3500011 ScaDFX=  1.000000  1.000000  1.000000  1.000000
 FoFCou: FMM=F IPFlag=           0 FMFlag=      100000 FMFlg1=           0
         NFxFlg=           0 DoJE=T BraDBF=F KetDBF=T FulRan=T
         wScrn=  0.000000 ICntrl=     500 IOpCl=  0 I1Cent=   200000004 NGrid=           0
         NMat0=    1 NMatS0=      1 NMatT0=    0 NMatD0=    1 NMtDS0=    0 NMtDT0=    0
 Petite list used in FoFCou.
 Initial guess <Sx>= 0.0000 <Sy>= 0.0000 <Sz>= 0.5000 <S**2>= 0.7500 S= 0.5000
 Requested convergence on RMS density matrix=1.00D-08 within 128 cycles.
 Requested convergence on MAX density matrix=1.00D-06.
 Requested convergence on             energy=1.00D-06.
 No special actions if energy rises.
 Inv3:  Mode=1 IEnd=    14454075.
 Iteration    1 A*A^-1 deviation from unit magnitude is 3.44D-15 for   1286.
 Iteration    1 A*A^-1 deviation from orthogonality  is 4.12D-15 for   1086    826.
 Iteration    1 A^-1*A deviation from unit magnitude is 3.11D-15 for    360.
 Iteration    1 A^-1*A deviation from orthogonality  is 6.57D-12 for   2141   1477.
 Error on total polarization charges =  0.01745
 SCF Done:  E(UM062X) =  -3262.93645096     A.U. after   20 cycles
            NFock= 20  Conv=0.39D-08     -V/T= 2.0021
 <Sx>= 0.0000 <Sy>= 0.0000 <Sz>= 0.5000 <S**2>= 0.7797 S= 0.5147
 <L.S>= 0.000000000000E+00
 Annihilation of the first spin contaminant:
 S**2 before annihilation     0.7797,   after     0.7506
 DoSCS=F DFT=T ScalE2(SS,OS)=  1.000000  1.000000
 ExpMin= 9.52D-02 ExpMax= 5.65D+05 ExpMxC= 5.46D+03 IAcc=3 IRadAn=         5 AccDes= 0.00D+00
 HarFok:  IExCor=  205 AccDes= 0.00D+00 IRadAn=         5 IDoV=-2 UseB2=F ITyADJ=14
 ICtDFT= 12500011 ScaDFX=  1.000000  1.000000  1.000000  1.000000
 Range of M.O.s used for correlation:    26   592
 NBasis=   592 NAE=    72 NBE=    71 NFC=    25 NFV=     0
 NROrb=    567 NOA=    47 NOB=    46 NVA=   520 NVB=   521

 **** Warning!!: The largest alpha MO coefficient is  0.67572735D+02


 **** Warning!!: The largest beta MO coefficient is  0.76216613D+02

 Ignoring spin specification with unrestricted ground state.
 NEqPCM:  Using non-equilibrium solvation (IEInf=1, Eps=  35.6880, EpsInf=   1.8069)
 Inv3:  Mode=1 IEnd=    14454075.
 Iteration    1 A*A^-1 deviation from unit magnitude is 3.11D-15 for   1603.
 Iteration    1 A*A^-1 deviation from orthogonality  is 2.14D-15 for   1879    962.
 Iteration    1 A^-1*A deviation from unit magnitude is 2.89D-15 for    658.
 Iteration    1 A^-1*A deviation from orthogonality  is 1.59D-15 for   1521    409.
 Orbital symmetries:
 Alpha Orbitals:
       Occupied  (A) (A) (A) (A) (A) (A) (A) (A) (A) (A) (A) (A)
                 (A) (A) (A) (A) (A) (A) (A) (A) (A) (A) (A) (A)
                 (A) (A) (A) (A) (A) (A) (A) (A) (A) (A) (A) (A)
                 (A) (A) (A) (A) (A) (A) (A) (A) (A) (A) (A) (A)
                 (A) (A) (A) (A) (A) (A) (A) (A) (A) (A) (A) (A)
                 (A) (A) (A) (A) (A) (A) (A) (A) (A) (A) (A) (A)
       Virtual   (A) (A) (A) (A) (A) (A) (A) (A) (A) (A) (A) (A)
                 (A) (A) (A) (A) (A) (A) (A) (A) (A) (A) (A) (A)
                 (A) (A) (A) (A) (A) (A) (A) (A) (A) (A) (A) (A)
                 (A) (A) (A) (A) (A) (A) (A) (A) (A) (A) (A) (A)
                 (A) (A) (A) (A) (A) (A) (A) (A) (A) (A) (A) (A)
                 (A) (A) (A) (A) (A) (A) (A) (A) (A) (A) (A) (A)
                 (A) (A) (A) (A) (A) (A) (A) (A) (A) (A) (A) (A)
                 (A) (A) (A) (A) (A) (A) (A) (A) (A) (A) (A) (A)
                 (A) (A) (A) (A) (A) (A) (A) (A) (A) (A) (A) (A)
                 (A) (A) (A) (A) (A) (A) (A) (A) (A) (A) (A) (A)
                 (A) (A) (A) (A) (A) (A) (A) (A) (A) (A) (A) (A)
                 (A) (A) (A) (A) (A) (A) (A) (A) (A) (A) (A) (A)
                 (A) (A) (A) (A) (A) (A) (A) (A) (A) (A) (A) (A)
                 (A) (A) (A) (A) (A) (A) (A) (A) (A) (A) (A) (A)
                 (A) (A) (A) (A) (A) (A) (A) (A) (A) (A) (A) (A)
                 (A) (A) (A) (A) (A) (A) (A) (A) (A) (A) (A) (A)
                 (A) (A) (A) (A) (A) (A) (A) (A) (A) (A) (A) (A)
                 (A) (A) (A) (A) (A) (A) (A) (A) (A) (A) (A) (A)
                 (A) (A) (A) (A) (A) (A) (A) (A) (A) (A) (A) (A)
                 (A) (A) (A) (A) (A) (A) (A) (A) (A) (A) (A) (A)
                 (A) (A) (A) (A) (A) (A) (A) (A) (A) (A) (A) (A)
                 (A) (A) (A) (A) (A) (A) (A) (A) (A) (A) (A) (A)
                 (A) (A) (A) (A) (A) (A) (A) (A) (A) (A) (A) (A)
                 (A) (A) (A) (A) (A) (A) (A) (A) (A) (A) (A) (A)
                 (A) (A) (A) (A) (A) (A) (A) (A) (A) (A) (A) (A)
                 (A) (A) (A) (A) (A) (A) (A) (A) (A) (A) (A) (A)
                 (A) (A) (A) (A) (A) (A) (A) (A) (A) (A) (A) (A)
                 (A) (A) (A) (A) (A) (A) (A) (A) (A) (A) (A) (A)
                 (A) (A) (A) (A) (A) (A) (A) (A) (A) (A) (A) (A)
                 (A) (A) (A) (A) (A) (A) (A) (A) (A) (A) (A) (A)
                 (A) (A) (A) (A) (A) (A) (A) (A) (A) (A) (A) (A)
                 (A) (A) (A) (A) (A) (A) (A) (A) (A) (A) (A) (A)
                 (A) (A) (A) (A) (A) (A) (A) (A) (A) (A) (A) (A)
                 (A) (A) (A) (A) (A) (A) (A) (A) (A) (A) (A) (A)
                 (A) (A) (A) (A) (A) (A) (A) (A) (A) (A) (A) (A)
                 (A) (A) (A) (A) (A) (A) (A) (A) (A) (A) (A) (A)
                 (A) (A) (A) (A) (A) (A) (A) (A) (A) (A) (A) (A)
                 (A) (A) (A) (A) (A) (A) (A) (A) (A) (A) (A) (A)
                 (A) (A) (A) (A) (A) (A) (A) (A) (A) (A) (A) (A)
                 (A) (A) (A) (A) (A) (A) (A) (A) (A) (A) (A) (A)
                 (A) (A) (A) (A) (A) (A) (A) (A) (A) (A) (A) (A)
                 (A) (A) (A) (A) (A) (A) (A) (A) (A) (A) (A) (A)
                 (A) (A) (A) (A) (A) (A) (A) (A) (A) (A) (A) (A)
                 (A) (A) (A) (A)
 Beta  Orbitals:
       Occupied  (A) (A) (A) (A) (A) (A) (A) (A) (A) (A) (A) (A)
                 (A) (A) (A) (A) (A) (A) (A) (A) (A) (A) (A) (A)
                 (A) (A) (A) (A) (A) (A) (A) (A) (A) (A) (A) (A)
                 (A) (A) (A) (A) (A) (A) (A) (A) (A) (A) (A) (A)
                 (A) (A) (A) (A) (A) (A) (A) (A) (A) (A) (A) (A)
                 (A) (A) (A) (A) (A) (A) (A) (A) (A) (A) (A)
       Virtual   (A) (A) (A) (A) (A) (A) (A) (A) (A) (A) (A) (A)
                 (A) (A) (A) (A) (A) (A) (A) (A) (A) (A) (A) (A)
                 (A) (A) (A) (A) (A) (A) (A) (A) (A) (A) (A) (A)
                 (A) (A) (A) (A) (A) (A) (A) (A) (A) (A) (A) (A)
                 (A) (A) (A) (A) (A) (A) (A) (A) (A) (A) (A) (A)
                 (A) (A) (A) (A) (A) (A) (A) (A) (A) (A) (A) (A)
                 (A) (A) (A) (A) (A) (A) (A) (A) (A) (A) (A) (A)
                 (A) (A) (A) (A) (A) (A) (A) (A) (A) (A) (A) (A)
                 (A) (A) (A) (A) (A) (A) (A) (A) (A) (A) (A) (A)
                 (A) (A) (A) (A) (A) (A) (A) (A) (A) (A) (A) (A)
                 (A) (A) (A) (A) (A) (A) (A) (A) (A) (A) (A) (A)
                 (A) (A) (A) (A) (A) (A) (A) (A) (A) (A) (A) (A)
                 (A) (A) (A) (A) (A) (A) (A) (A) (A) (A) (A) (A)
                 (A) (A) (A) (A) (A) (A) (A) (A) (A) (A) (A) (A)
                 (A) (A) (A) (A) (A) (A) (A) (A) (A) (A) (A) (A)
                 (A) (A) (A) (A) (A) (A) (A) (A) (A) (A) (A) (A)
                 (A) (A) (A) (A) (A) (A) (A) (A) (A) (A) (A) (A)
                 (A) (A) (A) (A) (A) (A) (A) (A) (A) (A) (A) (A)
                 (A) (A) (A) (A) (A) (A) (A) (A) (A) (A) (A) (A)
                 (A) (A) (A) (A) (A) (A) (A) (A) (A) (A) (A) (A)
                 (A) (A) (A) (A) (A) (A) (A) (A) (A) (A) (A) (A)
                 (A) (A) (A) (A) (A) (A) (A) (A) (A) (A) (A) (A)
                 (A) (A) (A) (A) (A) (A) (A) (A) (A) (A) (A) (A)
                 (A) (A) (A) (A) (A) (A) (A) (A) (A) (A) (A) (A)
                 (A) (A) (A) (A) (A) (A) (A) (A) (A) (A) (A) (A)
                 (A) (A) (A) (A) (A) (A) (A) (A) (A) (A) (A) (A)
                 (A) (A) (A) (A) (A) (A) (A) (A) (A) (A) (A) (A)
                 (A) (A) (A) (A) (A) (A) (A) (A) (A) (A) (A) (A)
                 (A) (A) (A) (A) (A) (A) (A) (A) (A) (A) (A) (A)
                 (A) (A) (A) (A) (A) (A) (A) (A) (A) (A) (A) (A)
                 (A) (A) (A) (A) (A) (A) (A) (A) (A) (A) (A) (A)
                 (A) (A) (A) (A) (A) (A) (A) (A) (A) (A) (A) (A)
                 (A) (A) (A) (A) (A) (A) (A) (A) (A) (A) (A) (A)
                 (A) (A) (A) (A) (A) (A) (A) (A) (A) (A) (A) (A)
                 (A) (A) (A) (A) (A) (A) (A) (A) (A) (A) (A) (A)
                 (A) (A) (A) (A) (A) (A) (A) (A) (A) (A) (A) (A)
                 (A) (A) (A) (A) (A) (A) (A) (A) (A) (A) (A) (A)
                 (A) (A) (A) (A) (A) (A) (A) (A) (A) (A) (A) (A)
                 (A) (A) (A) (A) (A) (A) (A) (A) (A) (A) (A) (A)
                 (A) (A) (A) (A) (A) (A) (A) (A) (A) (A) (A) (A)
                 (A) (A) (A) (A) (A) (A) (A) (A) (A) (A) (A) (A)
                 (A) (A) (A) (A) (A) (A) (A) (A) (A) (A) (A) (A)
                 (A) (A) (A) (A) (A) (A) (A) (A) (A) (A) (A) (A)
                 (A) (A) (A) (A) (A)
    20 initial guesses have been made.
 Convergence on wavefunction:    0.001000000000000
 Iteration     1 Dimension    20 NMult     0 NNew     20
 CISAX will form    20 AO SS matrices at one time.
 New state      2 was old state      7
 New state      3 was old state      2
 New state      5 was old state      3
 Iteration     2 Dimension    30 NMult    20 NNew     10
 Iteration     3 Dimension    40 NMult    30 NNew     10
 Iteration     4 Dimension    50 NMult    40 NNew     10
 Iteration     5 Dimension    60 NMult    50 NNew     10
 Iteration     6 Dimension    70 NMult    60 NNew     10
 Iteration     7 Dimension    78 NMult    70 NNew      8
 Iteration     8 Dimension    82 NMult    78 NNew      4
 Iteration     9 Dimension    86 NMult    82 NNew      4
 Iteration    10 Dimension    90 NMult    86 NNew      4
 ***********************************************************************
 Excited states from <AA,BB:AA,BB> singles matrix:
 ***********************************************************************
 
 ExtSpn:  IState=     1 X2= 1.014 Y2= 0.014 X2-Y2-1= 0.00D+00
          S2Grnd=  0.780 Ra=  0.013 Rb=  0.008 T=  0.001 S2Ext=  0.022 S2=  0.801
 ExtSpn:  IState=     2 X2= 1.004 Y2= 0.004 X2-Y2-1=-4.44D-16
          S2Grnd=  0.780 Ra=  0.008 Rb=  0.376 T=  0.114 S2Ext=  0.498 S2=  1.278
 ExtSpn:  IState=     3 X2= 1.011 Y2= 0.011 X2-Y2-1=-6.66D-16
          S2Grnd=  0.780 Ra=  0.053 Rb=  0.030 T=  0.059 S2Ext=  0.141 S2=  0.921
 ExtSpn:  IState=     4 X2= 1.011 Y2= 0.011 X2-Y2-1= 6.66D-16
          S2Grnd=  0.780 Ra=  0.150 Rb=  0.141 T=  0.253 S2Ext=  0.543 S2=  1.323
 ExtSpn:  IState=     5 X2= 1.011 Y2= 0.011 X2-Y2-1=-2.00D-15
          S2Grnd=  0.780 Ra=  0.104 Rb=  0.118 T=  0.161 S2Ext=  0.383 S2=  1.162
 Ground to excited state transition densities written to RWF  633
 Ground to excited state transition electric dipole moments (Au):
       state          X           Y           Z        Dip. S.      Osc.
         1         0.1285      0.7239      0.0000      0.5405      0.0250
         2         0.0000      0.0000     -0.0001      0.0000      0.0000
         3         1.0024     -0.1802      0.0000      1.0373      0.0783
         4        -0.3296     -0.3488      0.0000      0.2303      0.0193
         5        -1.1141      0.5105      0.0000      1.5018      0.1284
 Ground to excited state transition velocity dipole moments (Au):
       state          X           Y           Z        Dip. S.      Osc.
         1        -0.0106     -0.0560      0.0000      0.0033      0.0313
         2         0.0000      0.0000     -0.0001      0.0000      0.0000
         3        -0.1197      0.0212      0.0000      0.0148      0.0870
         4         0.0437      0.0450      0.0000      0.0039      0.0208
         5         0.1492     -0.0677      0.0000      0.0268      0.1396
 Ground to excited state transition magnetic dipole moments (Au):
       state          X           Y           Z
         1         0.0000      0.0000     -0.0783
         2        -0.1033     -0.4847      0.0000
         3         0.0000      0.0000      0.1026
         4         0.0000      0.0000     -0.2580
         5         0.0000      0.0000     -1.4610
 Ground to excited state transition velocity quadrupole moments (Au):
       state          XX          YY          ZZ          XY          XZ          YZ
         1        -0.1781      0.0049      0.0017     -0.1221      0.0000      0.0000
         2         0.0000      0.0000      0.0000      0.0000      0.0162     -0.0027
         3        -0.4868      0.0092      0.0024     -0.0103      0.0000      0.0000
         4         0.4230     -0.0214      0.0075     -0.0550      0.0000      0.0000
         5        -0.0008      0.1978     -0.0092     -0.3669      0.0000      0.0000
 <0|del|b> * <b|rxdel|0> + <0|del|b> * <b|delr+rdel|0>
 Rotatory Strengths (R) in cgs (10**-40 erg-esu-cm/Gauss)
       state          XX          YY          ZZ    R(velocity)    E-M Angle
         1        -0.0064      0.0029     -0.0015     -0.0016       90.00
         2         0.0006     -0.0008     -0.0002     -0.0002       90.00
         3        -0.0021      0.0036      0.0003      0.0006       90.00
         4         0.0019      0.0022      0.0019      0.0020       90.00
         5        -0.0257     -0.0060      0.0157     -0.0053       90.00
 1/2[<0|r|b>*<b|rxdel|0> + (<0|rxdel|b>*<b|r|0>)*]
 Rotatory Strengths (R) in cgs (10**-40 erg-esu-cm/Gauss)
       state          XX          YY          ZZ     R(length)
         1         0.0036     -0.0083     -0.0002     -0.0016
         2        -0.0016      0.0010      0.0000     -0.0002
         3         0.0061     -0.0027     -0.0018      0.0005
         4         0.0019      0.0015      0.0021      0.0018
         5         0.0230     -0.0035     -0.0353     -0.0053
  1/2[<0|del|b>*<b|r|0> + (<0|r|b>*<b|del|0>)*] (Au)
       state          X           Y           Z        Dip. S.   Osc.(frdel)
         1        -0.0014     -0.0406      0.0000      0.0419      0.0279
         2         0.0000      0.0000      0.0000      0.0000      0.0000
         3        -0.1199     -0.0038      0.0000      0.1238      0.0825
         4        -0.0144     -0.0157      0.0000      0.0301      0.0201
         5        -0.1663     -0.0346      0.0000      0.2008      0.1339

 Excitation energies and oscillator strengths:
 
 Excited State   1:  2.051-A      1.8844 eV  657.95 nm  f=0.0250  <S**2>=0.801
     72A -> 73A        0.97695
     70B -> 72B        0.11615
 This state for optimization and/or second-order correction.
 Total Energy, E(TD-HF/TD-KS) =  -3262.86720093    
 Copying the excited state density for this state as the 1-particle RhoCI density.
 
 Excited State   2:  2.472-A      2.6473 eV  468.35 nm  f=0.0000  <S**2>=1.278
     66B -> 72B       -0.10153
     68B -> 72B        0.82698
     68B -> 73B        0.44025
     68B -> 79B       -0.24671
 
 Excited State   3:  2.164-A      3.0796 eV  402.60 nm  f=0.0783  <S**2>=0.921
     72A -> 74A        0.84205
     71B -> 72B        0.43934
 
 Excited State   4:  2.509-A      3.4252 eV  361.98 nm  f=0.0193  <S**2>=1.323
     67A -> 73A       -0.11491
     69A -> 73A       -0.23266
     71A -> 73A        0.19852
     72A -> 74A       -0.11043
     72A -> 75A        0.57149
     67B -> 72B        0.12494
     69B -> 73B        0.21411
     70B -> 72B        0.60052
     70B -> 73B        0.12788
     70B -> 74B       -0.11165
     71B -> 73B       -0.12496
 
 Excited State   5:  2.377-A      3.4898 eV  355.28 nm  f=0.1284  <S**2>=1.162
     70A -> 73A       -0.18692
     71A -> 73A        0.14871
     72A -> 74A       -0.41999
     72A -> 75A        0.34499
     67B -> 72B       -0.19123
     70B -> 72B       -0.29018
     70B -> 73B       -0.21405
     70B -> 75B       -0.13864
     71B -> 72B        0.60771
 SavETr:  write IOETrn=   770 NScale= 10 NData=  16 NLR=1 NState=    5 LETran=      96.

 **********************************************************************

            Population analysis using the SCF density.

 **********************************************************************

 Orbital symmetries:
 Alpha Orbitals:
       Occupied  (A) (A) (A) (A) (A) (A) (A) (A) (A) (A) (A) (A)
                 (A) (A) (A) (A) (A) (A) (A) (A) (A) (A) (A) (A)
                 (A) (A) (A) (A) (A) (A) (A) (A) (A) (A) (A) (A)
                 (A) (A) (A) (A) (A) (A) (A) (A) (A) (A) (A) (A)
                 (A) (A) (A) (A) (A) (A) (A) (A) (A) (A) (A) (A)
                 (A) (A) (A) (A) (A) (A) (A) (A) (A) (A) (A) (A)
       Virtual   (A) (A) (A) (A) (A) (A) (A) (A) (A) (A) (A) (A)
                 (A) (A) (A) (A) (A) (A) (A) (A) (A) (A) (A) (A)
                 (A) (A) (A) (A) (A) (A) (A) (A) (A) (A) (A) (A)
                 (A) (A) (A) (A) (A) (A) (A) (A) (A) (A) (A) (A)
                 (A) (A) (A) (A) (A) (A) (A) (A) (A) (A) (A) (A)
                 (A) (A) (A) (A) (A) (A) (A) (A) (A) (A) (A) (A)
                 (A) (A) (A) (A) (A) (A) (A) (A) (A) (A) (A) (A)
                 (A) (A) (A) (A) (A) (A) (A) (A) (A) (A) (A) (A)
                 (A) (A) (A) (A) (A) (A) (A) (A) (A) (A) (A) (A)
                 (A) (A) (A) (A) (A) (A) (A) (A) (A) (A) (A) (A)
                 (A) (A) (A) (A) (A) (A) (A) (A) (A) (A) (A) (A)
                 (A) (A) (A) (A) (A) (A) (A) (A) (A) (A) (A) (A)
                 (A) (A) (A) (A) (A) (A) (A) (A) (A) (A) (A) (A)
                 (A) (A) (A) (A) (A) (A) (A) (A) (A) (A) (A) (A)
                 (A) (A) (A) (A) (A) (A) (A) (A) (A) (A) (A) (A)
                 (A) (A) (A) (A) (A) (A) (A) (A) (A) (A) (A) (A)
                 (A) (A) (A) (A) (A) (A) (A) (A) (A) (A) (A) (A)
                 (A) (A) (A) (A) (A) (A) (A) (A) (A) (A) (A) (A)
                 (A) (A) (A) (A) (A) (A) (A) (A) (A) (A) (A) (A)
                 (A) (A) (A) (A) (A) (A) (A) (A) (A) (A) (A) (A)
                 (A) (A) (A) (A) (A) (A) (A) (A) (A) (A) (A) (A)
                 (A) (A) (A) (A) (A) (A) (A) (A) (A) (A) (A) (A)
                 (A) (A) (A) (A) (A) (A) (A) (A) (A) (A) (A) (A)
                 (A) (A) (A) (A) (A) (A) (A) (A) (A) (A) (A) (A)
                 (A) (A) (A) (A) (A) (A) (A) (A) (A) (A) (A) (A)
                 (A) (A) (A) (A) (A) (A) (A) (A) (A) (A) (A) (A)
                 (A) (A) (A) (A) (A) (A) (A) (A) (A) (A) (A) (A)
                 (A) (A) (A) (A) (A) (A) (A) (A) (A) (A) (A) (A)
                 (A) (A) (A) (A) (A) (A) (A) (A) (A) (A) (A) (A)
                 (A) (A) (A) (A) (A) (A) (A) (A) (A) (A) (A) (A)
                 (A) (A) (A) (A) (A) (A) (A) (A) (A) (A) (A) (A)
                 (A) (A) (A) (A) (A) (A) (A) (A) (A) (A) (A) (A)
                 (A) (A) (A) (A) (A) (A) (A) (A) (A) (A) (A) (A)
                 (A) (A) (A) (A) (A) (A) (A) (A) (A) (A) (A) (A)
                 (A) (A) (A) (A) (A) (A) (A) (A) (A) (A) (A) (A)
                 (A) (A) (A) (A) (A) (A) (A) (A) (A) (A) (A) (A)
                 (A) (A) (A) (A) (A) (A) (A) (A) (A) (A) (A) (A)
                 (A) (A) (A) (A) (A) (A) (A) (A) (A) (A) (A) (A)
                 (A) (A) (A) (A) (A) (A) (A) (A) (A) (A) (A) (A)
                 (A) (A) (A) (A) (A) (A) (A) (A) (A) (A) (A) (A)
                 (A) (A) (A) (A) (A) (A) (A) (A) (A) (A) (A) (A)
                 (A) (A) (A) (A) (A) (A) (A) (A) (A) (A) (A) (A)
                 (A) (A) (A) (A) (A) (A) (A) (A) (A) (A) (A) (A)
                 (A) (A) (A) (A)
 Beta  Orbitals:
       Occupied  (A) (A) (A) (A) (A) (A) (A) (A) (A) (A) (A) (A)
                 (A) (A) (A) (A) (A) (A) (A) (A) (A) (A) (A) (A)
                 (A) (A) (A) (A) (A) (A) (A) (A) (A) (A) (A) (A)
                 (A) (A) (A) (A) (A) (A) (A) (A) (A) (A) (A) (A)
                 (A) (A) (A) (A) (A) (A) (A) (A) (A) (A) (A) (A)
                 (A) (A) (A) (A) (A) (A) (A) (A) (A) (A) (A)
       Virtual   (A) (A) (A) (A) (A) (A) (A) (A) (A) (A) (A) (A)
                 (A) (A) (A) (A) (A) (A) (A) (A) (A) (A) (A) (A)
                 (A) (A) (A) (A) (A) (A) (A) (A) (A) (A) (A) (A)
                 (A) (A) (A) (A) (A) (A) (A) (A) (A) (A) (A) (A)
                 (A) (A) (A) (A) (A) (A) (A) (A) (A) (A) (A) (A)
                 (A) (A) (A) (A) (A) (A) (A) (A) (A) (A) (A) (A)
                 (A) (A) (A) (A) (A) (A) (A) (A) (A) (A) (A) (A)
                 (A) (A) (A) (A) (A) (A) (A) (A) (A) (A) (A) (A)
                 (A) (A) (A) (A) (A) (A) (A) (A) (A) (A) (A) (A)
                 (A) (A) (A) (A) (A) (A) (A) (A) (A) (A) (A) (A)
                 (A) (A) (A) (A) (A) (A) (A) (A) (A) (A) (A) (A)
                 (A) (A) (A) (A) (A) (A) (A) (A) (A) (A) (A) (A)
                 (A) (A) (A) (A) (A) (A) (A) (A) (A) (A) (A) (A)
                 (A) (A) (A) (A) (A) (A) (A) (A) (A) (A) (A) (A)
                 (A) (A) (A) (A) (A) (A) (A) (A) (A) (A) (A) (A)
                 (A) (A) (A) (A) (A) (A) (A) (A) (A) (A) (A) (A)
                 (A) (A) (A) (A) (A) (A) (A) (A) (A) (A) (A) (A)
                 (A) (A) (A) (A) (A) (A) (A) (A) (A) (A) (A) (A)
                 (A) (A) (A) (A) (A) (A) (A) (A) (A) (A) (A) (A)
                 (A) (A) (A) (A) (A) (A) (A) (A) (A) (A) (A) (A)
                 (A) (A) (A) (A) (A) (A) (A) (A) (A) (A) (A) (A)
                 (A) (A) (A) (A) (A) (A) (A) (A) (A) (A) (A) (A)
                 (A) (A) (A) (A) (A) (A) (A) (A) (A) (A) (A) (A)
                 (A) (A) (A) (A) (A) (A) (A) (A) (A) (A) (A) (A)
                 (A) (A) (A) (A) (A) (A) (A) (A) (A) (A) (A) (A)
                 (A) (A) (A) (A) (A) (A) (A) (A) (A) (A) (A) (A)
                 (A) (A) (A) (A) (A) (A) (A) (A) (A) (A) (A) (A)
                 (A) (A) (A) (A) (A) (A) (A) (A) (A) (A) (A) (A)
                 (A) (A) (A) (A) (A) (A) (A) (A) (A) (A) (A) (A)
                 (A) (A) (A) (A) (A) (A) (A) (A) (A) (A) (A) (A)
                 (A) (A) (A) (A) (A) (A) (A) (A) (A) (A) (A) (A)
                 (A) (A) (A) (A) (A) (A) (A) (A) (A) (A) (A) (A)
                 (A) (A) (A) (A) (A) (A) (A) (A) (A) (A) (A) (A)
                 (A) (A) (A) (A) (A) (A) (A) (A) (A) (A) (A) (A)
                 (A) (A) (A) (A) (A) (A) (A) (A) (A) (A) (A) (A)
                 (A) (A) (A) (A) (A) (A) (A) (A) (A) (A) (A) (A)
                 (A) (A) (A) (A) (A) (A) (A) (A) (A) (A) (A) (A)
                 (A) (A) (A) (A) (A) (A) (A) (A) (A) (A) (A) (A)
                 (A) (A) (A) (A) (A) (A) (A) (A) (A) (A) (A) (A)
                 (A) (A) (A) (A) (A) (A) (A) (A) (A) (A) (A) (A)
                 (A) (A) (A) (A) (A) (A) (A) (A) (A) (A) (A) (A)
                 (A) (A) (A) (A) (A) (A) (A) (A) (A) (A) (A) (A)
                 (A) (A) (A) (A) (A) (A) (A) (A) (A) (A) (A) (A)
                 (A) (A) (A) (A) (A)
 The electronic state is 2-A.
 Alpha  occ. eigenvalues -- -485.38462 -63.36932 -57.18866 -57.18638 -57.18624
 Alpha  occ. eigenvalues --  -19.69111 -19.61491 -10.64170 -10.63406 -10.61849
 Alpha  occ. eigenvalues --  -10.58360 -10.57937 -10.57652 -10.57546 -10.57466
 Alpha  occ. eigenvalues --  -10.57342 -10.56565 -10.56080 -10.55972 -10.55962
 Alpha  occ. eigenvalues --  -10.55685  -9.03578  -6.85975  -6.85119  -6.85080
 Alpha  occ. eigenvalues --   -2.89353  -2.89042  -2.89005  -2.88200  -2.88200
 Alpha  occ. eigenvalues --   -1.23862  -1.15507  -1.00537  -0.98435  -0.93363
 Alpha  occ. eigenvalues --   -0.89362  -0.88099  -0.86830  -0.84320  -0.79553
 Alpha  occ. eigenvalues --   -0.76077  -0.72308  -0.70163  -0.69875  -0.65189
 Alpha  occ. eigenvalues --   -0.63829  -0.61580  -0.56345  -0.55967  -0.55202
 Alpha  occ. eigenvalues --   -0.54770  -0.54235  -0.53571  -0.51522  -0.50742
 Alpha  occ. eigenvalues --   -0.50487  -0.50384  -0.47075  -0.46776  -0.45298
 Alpha  occ. eigenvalues --   -0.44426  -0.43837  -0.41854  -0.41680  -0.40105
 Alpha  occ. eigenvalues --   -0.36192  -0.35475  -0.34303  -0.33957  -0.32945
 Alpha  occ. eigenvalues --   -0.31619  -0.22261
 Alpha virt. eigenvalues --   -0.06086  -0.01327   0.00469   0.02670   0.06138
 Alpha virt. eigenvalues --    0.06568   0.07878   0.09264   0.10413   0.11050
 Alpha virt. eigenvalues --    0.11700   0.12947   0.13659   0.14269   0.14862
 Alpha virt. eigenvalues --    0.16287   0.16508   0.17594   0.18328   0.20652
 Alpha virt. eigenvalues --    0.21104   0.21211   0.21877   0.22273   0.22872
 Alpha virt. eigenvalues --    0.23170   0.23708   0.24448   0.25055   0.25812
 Alpha virt. eigenvalues --    0.25917   0.26412   0.27036   0.27442   0.27497
 Alpha virt. eigenvalues --    0.27737   0.28391   0.29094   0.29492   0.29997
 Alpha virt. eigenvalues --    0.30416   0.31733   0.31938   0.32277   0.33160
 Alpha virt. eigenvalues --    0.33374   0.33924   0.35013   0.35307   0.36170
 Alpha virt. eigenvalues --    0.37085   0.37443   0.37958   0.38603   0.38790
 Alpha virt. eigenvalues --    0.39437   0.40321   0.40353   0.41305   0.41486
 Alpha virt. eigenvalues --    0.42849   0.43177   0.43973   0.44177   0.45527
 Alpha virt. eigenvalues --    0.46533   0.46569   0.47705   0.48471   0.48922
 Alpha virt. eigenvalues --    0.50665   0.50901   0.51374   0.51551   0.51911
 Alpha virt. eigenvalues --    0.52709   0.53086   0.54294   0.54988   0.55544
 Alpha virt. eigenvalues --    0.56283   0.57113   0.57635   0.59217   0.59941
 Alpha virt. eigenvalues --    0.60650   0.61851   0.63296   0.64575   0.65035
 Alpha virt. eigenvalues --    0.65827   0.66163   0.67406   0.67630   0.68191
 Alpha virt. eigenvalues --    0.68272   0.69362   0.70034   0.70464   0.72371
 Alpha virt. eigenvalues --    0.73269   0.73500   0.74224   0.75045   0.75968
 Alpha virt. eigenvalues --    0.76259   0.76305   0.77002   0.77695   0.78290
 Alpha virt. eigenvalues --    0.78567   0.79408   0.81361   0.81426   0.82099
 Alpha virt. eigenvalues --    0.82622   0.85430   0.85815   0.87194   0.87560
 Alpha virt. eigenvalues --    0.87624   0.88237   0.90477   0.90817   0.91289
 Alpha virt. eigenvalues --    0.91728   0.92356   0.92626   0.93329   0.95954
 Alpha virt. eigenvalues --    0.98297   0.98852   0.99260   0.99565   1.00118
 Alpha virt. eigenvalues --    1.00690   1.03864   1.04405   1.05732   1.06384
 Alpha virt. eigenvalues --    1.07516   1.10283   1.10643   1.10949   1.12500
 Alpha virt. eigenvalues --    1.13345   1.14850   1.15570   1.15823   1.19950
 Alpha virt. eigenvalues --    1.20815   1.21413   1.22890   1.23645   1.24299
 Alpha virt. eigenvalues --    1.24355   1.25575   1.26012   1.26584   1.27343
 Alpha virt. eigenvalues --    1.28705   1.29061   1.29542   1.31778   1.33844
 Alpha virt. eigenvalues --    1.34645   1.34992   1.37586   1.37696   1.39448
 Alpha virt. eigenvalues --    1.39903   1.41222   1.41494   1.41932   1.42991
 Alpha virt. eigenvalues --    1.45325   1.45976   1.46707   1.47177   1.47782
 Alpha virt. eigenvalues --    1.48930   1.49739   1.51076   1.51836   1.52625
 Alpha virt. eigenvalues --    1.53175   1.53256   1.53747   1.54817   1.57042
 Alpha virt. eigenvalues --    1.57366   1.58382   1.59290   1.60375   1.61032
 Alpha virt. eigenvalues --    1.62009   1.62219   1.64323   1.64379   1.64732
 Alpha virt. eigenvalues --    1.65697   1.66586   1.67888   1.67917   1.69738
 Alpha virt. eigenvalues --    1.69802   1.71145   1.71814   1.72817   1.73614
 Alpha virt. eigenvalues --    1.74753   1.75363   1.76794   1.77042   1.78522
 Alpha virt. eigenvalues --    1.79402   1.80320   1.81827   1.82952   1.85063
 Alpha virt. eigenvalues --    1.86755   1.87521   1.87650   1.88589   1.90777
 Alpha virt. eigenvalues --    1.91243   1.91783   1.91953   1.93659   1.93755
 Alpha virt. eigenvalues --    1.95899   1.99386   1.99463   2.02261   2.03033
 Alpha virt. eigenvalues --    2.03372   2.03770   2.08113   2.08218   2.10283
 Alpha virt. eigenvalues --    2.12479   2.14289   2.15142   2.16661   2.16898
 Alpha virt. eigenvalues --    2.18314   2.18939   2.19936   2.20513   2.20645
 Alpha virt. eigenvalues --    2.21648   2.23294   2.24573   2.26625   2.28501
 Alpha virt. eigenvalues --    2.30835   2.32140   2.34659   2.34811   2.35475
 Alpha virt. eigenvalues --    2.36042   2.36588   2.37822   2.38508   2.43369
 Alpha virt. eigenvalues --    2.45412   2.45603   2.48468   2.49001   2.52235
 Alpha virt. eigenvalues --    2.53323   2.53756   2.54844   2.58116   2.58724
 Alpha virt. eigenvalues --    2.59266   2.60736   2.60823   2.61957   2.62742
 Alpha virt. eigenvalues --    2.63555   2.64531   2.65239   2.67468   2.68470
 Alpha virt. eigenvalues --    2.68542   2.69310   2.70844   2.71817   2.72075
 Alpha virt. eigenvalues --    2.74536   2.75146   2.76208   2.76433   2.77243
 Alpha virt. eigenvalues --    2.77949   2.78579   2.80624   2.80880   2.81650
 Alpha virt. eigenvalues --    2.82148   2.82947   2.84016   2.84628   2.87213
 Alpha virt. eigenvalues --    2.87416   2.87672   2.88766   2.89082   2.89664
 Alpha virt. eigenvalues --    2.89810   2.90123   2.91569   2.92914   2.94220
 Alpha virt. eigenvalues --    2.94445   2.96170   2.96541   2.97712   2.97750
 Alpha virt. eigenvalues --    2.98961   2.99961   3.00712   3.02839   3.02935
 Alpha virt. eigenvalues --    3.03480   3.04891   3.05044   3.05285   3.07036
 Alpha virt. eigenvalues --    3.09734   3.10235   3.11942   3.12418   3.12476
 Alpha virt. eigenvalues --    3.12693   3.15221   3.16085   3.16374   3.16951
 Alpha virt. eigenvalues --    3.17733   3.19109   3.19388   3.19999   3.20565
 Alpha virt. eigenvalues --    3.21991   3.23542   3.24567   3.25611   3.28029
 Alpha virt. eigenvalues --    3.28472   3.29594   3.30639   3.30866   3.31486
 Alpha virt. eigenvalues --    3.31647   3.31834   3.32907   3.33426   3.35057
 Alpha virt. eigenvalues --    3.37668   3.38106   3.38819   3.39979   3.41175
 Alpha virt. eigenvalues --    3.41418   3.43087   3.43270   3.44406   3.46013
 Alpha virt. eigenvalues --    3.46126   3.46864   3.47018   3.47551   3.49321
 Alpha virt. eigenvalues --    3.49557   3.50909   3.52191   3.53280   3.53520
 Alpha virt. eigenvalues --    3.55226   3.56150   3.56872   3.57107   3.58101
 Alpha virt. eigenvalues --    3.58935   3.62041   3.63057   3.65018   3.65911
 Alpha virt. eigenvalues --    3.65997   3.69469   3.73806   3.74948   3.77454
 Alpha virt. eigenvalues --    3.78047   3.78590   3.79328   3.82008   3.83468
 Alpha virt. eigenvalues --    3.84298   3.86467   3.87608   3.89065   3.93611
 Alpha virt. eigenvalues --    3.95461   3.96680   3.98453   3.99042   4.00416
 Alpha virt. eigenvalues --    4.01532   4.03570   4.05613   4.05831   4.06126
 Alpha virt. eigenvalues --    4.09317   4.09610   4.10663   4.11068   4.12643
 Alpha virt. eigenvalues --    4.13821   4.14942   4.15911   4.16956   4.18844
 Alpha virt. eigenvalues --    4.18974   4.20393   4.21377   4.22591   4.23266
 Alpha virt. eigenvalues --    4.23925   4.27018   4.28207   4.29821   4.30144
 Alpha virt. eigenvalues --    4.34738   4.36740   4.37323   4.37580   4.38931
 Alpha virt. eigenvalues --    4.41985   4.48465   4.50222   4.52712   4.53861
 Alpha virt. eigenvalues --    4.54150   4.55205   4.58113   4.61674   4.65146
 Alpha virt. eigenvalues --    4.66600   4.68674   4.69339   4.70764   4.74252
 Alpha virt. eigenvalues --    4.75695   4.76744   4.78611   4.83142   4.87028
 Alpha virt. eigenvalues --    4.91409   4.94659   4.98658   5.00873   5.02397
 Alpha virt. eigenvalues --    5.07016   5.09470   5.16097   5.17891   5.20610
 Alpha virt. eigenvalues --    5.22438   5.24619   5.26617   5.27541   5.30076
 Alpha virt. eigenvalues --    5.36882   5.40064   5.42275   5.47060   5.50165
 Alpha virt. eigenvalues --    5.54899   5.57128   5.58884   5.67635   5.75656
 Alpha virt. eigenvalues --    5.82580   5.84619   6.02830   6.04963   6.34474
 Alpha virt. eigenvalues --    6.37607   6.38073   6.39906   6.41678   6.65609
 Alpha virt. eigenvalues --    6.71307   6.72406   6.80471   6.83075   7.01280
 Alpha virt. eigenvalues --    7.07774   7.16540   7.35103   7.85396  22.12687
 Alpha virt. eigenvalues --   22.54417  22.66726  22.74082  22.80760  22.85460
 Alpha virt. eigenvalues --   22.92260  22.93892  22.98583  23.06645  23.24266
 Alpha virt. eigenvalues --   23.40996  23.43268  23.98607  44.09666  44.22442
  Beta  occ. eigenvalues -- -485.38459 -63.36930 -57.18869 -57.18626 -57.18623
  Beta  occ. eigenvalues --  -19.68832 -19.61151 -10.63868 -10.63421 -10.61764
  Beta  occ. eigenvalues --  -10.58422 -10.57870 -10.57687 -10.57547 -10.57430
  Beta  occ. eigenvalues --  -10.57408 -10.56505 -10.56044 -10.55996 -10.55970
  Beta  occ. eigenvalues --  -10.55627  -9.03574  -6.85984  -6.85096  -6.85078
  Beta  occ. eigenvalues --   -2.89354  -2.89035  -2.89009  -2.88191  -2.88190
  Beta  occ. eigenvalues --   -1.22944  -1.14636  -1.00283  -0.98283  -0.93039
  Beta  occ. eigenvalues --   -0.89128  -0.87744  -0.86695  -0.84164  -0.78843
  Beta  occ. eigenvalues --   -0.75901  -0.71976  -0.70019  -0.69551  -0.64900
  Beta  occ. eigenvalues --   -0.63608  -0.61273  -0.56119  -0.55844  -0.54488
  Beta  occ. eigenvalues --   -0.53878  -0.53360  -0.52829  -0.51376  -0.50597
  Beta  occ. eigenvalues --   -0.50115  -0.48526  -0.46560  -0.46499  -0.45173
  Beta  occ. eigenvalues --   -0.43721  -0.43226  -0.41715  -0.41447  -0.39011
  Beta  occ. eigenvalues --   -0.36156  -0.33811  -0.33747  -0.33018  -0.31862
  Beta  occ. eigenvalues --   -0.31259
  Beta virt. eigenvalues --   -0.09090  -0.04587  -0.00116   0.00866   0.02838
  Beta virt. eigenvalues --    0.06654   0.08028   0.09161   0.09260   0.10431
  Beta virt. eigenvalues --    0.10964   0.11652   0.12832   0.13633   0.14224
  Beta virt. eigenvalues --    0.14789   0.16236   0.17064   0.17402   0.18232
  Beta virt. eigenvalues --    0.20380   0.21157   0.21387   0.21997   0.22155
  Beta virt. eigenvalues --    0.22859   0.23028   0.23979   0.24474   0.25247
  Beta virt. eigenvalues --    0.25714   0.25905   0.26584   0.26998   0.27415
  Beta virt. eigenvalues --    0.27823   0.27891   0.28372   0.29282   0.29413
  Beta virt. eigenvalues --    0.30022   0.30500   0.31877   0.31879   0.32406
  Beta virt. eigenvalues --    0.33322   0.33336   0.33803   0.34779   0.35188
  Beta virt. eigenvalues --    0.36046   0.36945   0.37661   0.37882   0.38519
  Beta virt. eigenvalues --    0.39038   0.39694   0.40309   0.40424   0.41377
  Beta virt. eigenvalues --    0.41478   0.42892   0.43278   0.43589   0.44198
  Beta virt. eigenvalues --    0.45800   0.46411   0.46695   0.47702   0.48596
  Beta virt. eigenvalues --    0.49014   0.50542   0.50813   0.51358   0.51491
  Beta virt. eigenvalues --    0.51999   0.53100   0.53108   0.54243   0.55068
  Beta virt. eigenvalues --    0.55674   0.56305   0.57415   0.57749   0.59369
  Beta virt. eigenvalues --    0.60010   0.60887   0.61737   0.63273   0.64369
  Beta virt. eigenvalues --    0.65085   0.65746   0.66009   0.67340   0.67792
  Beta virt. eigenvalues --    0.68274   0.68326   0.69397   0.69973   0.70400
  Beta virt. eigenvalues --    0.72420   0.72964   0.73484   0.74397   0.74880
  Beta virt. eigenvalues --    0.75892   0.76239   0.76598   0.76966   0.77958
  Beta virt. eigenvalues --    0.78385   0.78506   0.79431   0.81381   0.81729
  Beta virt. eigenvalues --    0.82042   0.83328   0.85464   0.85785   0.87362
  Beta virt. eigenvalues --    0.87687   0.87719   0.88291   0.90243   0.91087
  Beta virt. eigenvalues --    0.91092   0.91716   0.92407   0.92866   0.93278
  Beta virt. eigenvalues --    0.95913   0.98426   0.98846   0.99408   0.99891
  Beta virt. eigenvalues --    1.00084   1.00812   1.03834   1.04838   1.05599
  Beta virt. eigenvalues --    1.06424   1.07592   1.10416   1.10824   1.11129
  Beta virt. eigenvalues --    1.12444   1.13439   1.15053   1.15692   1.15923
  Beta virt. eigenvalues --    1.19928   1.20948   1.21484   1.23078   1.23856
  Beta virt. eigenvalues --    1.24328   1.24891   1.25673   1.26245   1.26835
  Beta virt. eigenvalues --    1.27486   1.28795   1.29378   1.29610   1.31824
  Beta virt. eigenvalues --    1.33957   1.34839   1.35142   1.37652   1.37894
  Beta virt. eigenvalues --    1.39654   1.40148   1.41588   1.41992   1.42309
  Beta virt. eigenvalues --    1.43466   1.45482   1.46509   1.46866   1.47289
  Beta virt. eigenvalues --    1.47957   1.49075   1.49938   1.51288   1.51936
  Beta virt. eigenvalues --    1.53030   1.53272   1.53571   1.54985   1.55192
  Beta virt. eigenvalues --    1.57091   1.57949   1.58482   1.59496   1.60545
  Beta virt. eigenvalues --    1.61353   1.62345   1.62495   1.64350   1.64755
  Beta virt. eigenvalues --    1.65095   1.65981   1.67568   1.68062   1.68139
  Beta virt. eigenvalues --    1.70094   1.70228   1.71458   1.72213   1.72942
  Beta virt. eigenvalues --    1.73817   1.74887   1.75413   1.76926   1.77246
  Beta virt. eigenvalues --    1.78720   1.79530   1.80411   1.82126   1.83168
  Beta virt. eigenvalues --    1.85502   1.86814   1.87651   1.87992   1.88912
  Beta virt. eigenvalues --    1.90809   1.91779   1.92142   1.92483   1.93974
  Beta virt. eigenvalues --    1.94118   1.96341   1.99693   1.99708   2.02773
  Beta virt. eigenvalues --    2.03429   2.03588   2.03911   2.08370   2.08485
  Beta virt. eigenvalues --    2.10521   2.12718   2.14612   2.15672   2.17101
  Beta virt. eigenvalues --    2.17191   2.18499   2.19366   2.20215   2.20765
  Beta virt. eigenvalues --    2.21139   2.21799   2.24045   2.24860   2.26800
  Beta virt. eigenvalues --    2.29108   2.31149   2.32514   2.34959   2.34984
  Beta virt. eigenvalues --    2.36282   2.36411   2.37097   2.38540   2.38763
  Beta virt. eigenvalues --    2.43657   2.45577   2.45864   2.48653   2.49196
  Beta virt. eigenvalues --    2.52426   2.53922   2.54748   2.55895   2.58361
  Beta virt. eigenvalues --    2.58972   2.59574   2.60875   2.61064   2.62172
  Beta virt. eigenvalues --    2.63627   2.64411   2.64697   2.66217   2.68512
  Beta virt. eigenvalues --    2.68751   2.69338   2.69520   2.71783   2.72066
  Beta virt. eigenvalues --    2.72345   2.74713   2.75791   2.76406   2.77348
  Beta virt. eigenvalues --    2.77480   2.78220   2.79430   2.80968   2.80999
  Beta virt. eigenvalues --    2.82188   2.82398   2.83456   2.84378   2.84781
  Beta virt. eigenvalues --    2.87482   2.88088   2.88971   2.89349   2.89733
  Beta virt. eigenvalues --    2.90195   2.90692   2.90721   2.91878   2.93633
  Beta virt. eigenvalues --    2.94941   2.95278   2.96870   2.97376   2.97968
  Beta virt. eigenvalues --    2.98258   2.99478   3.00239   3.01139   3.03181
  Beta virt. eigenvalues --    3.03726   3.04041   3.05347   3.05485   3.05745
  Beta virt. eigenvalues --    3.07577   3.10297   3.10600   3.12443   3.12978
  Beta virt. eigenvalues --    3.13156   3.13427   3.15811   3.16571   3.16712
  Beta virt. eigenvalues --    3.17509   3.18459   3.19532   3.20065   3.20662
  Beta virt. eigenvalues --    3.21110   3.22426   3.24261   3.26110   3.26555
  Beta virt. eigenvalues --    3.28939   3.28962   3.30007   3.30963   3.31299
  Beta virt. eigenvalues --    3.32099   3.32312   3.32388   3.33183   3.34063
  Beta virt. eigenvalues --    3.35374   3.38198   3.38516   3.39186   3.40915
  Beta virt. eigenvalues --    3.41754   3.41985   3.43503   3.43944   3.44859
  Beta virt. eigenvalues --    3.46423   3.46826   3.47322   3.47959   3.48416
  Beta virt. eigenvalues --    3.49818   3.50297   3.51321   3.52717   3.53947
  Beta virt. eigenvalues --    3.54115   3.55702   3.56548   3.57590   3.57602
  Beta virt. eigenvalues --    3.58848   3.59543   3.62267   3.63335   3.65973
  Beta virt. eigenvalues --    3.66263   3.66985   3.69717   3.74782   3.75195
  Beta virt. eigenvalues --    3.77985   3.78604   3.79127   3.80182   3.82726
  Beta virt. eigenvalues --    3.83906   3.84789   3.87036   3.87982   3.89971
  Beta virt. eigenvalues --    3.93989   3.95988   3.97383   4.00171   4.00627
  Beta virt. eigenvalues --    4.00851   4.02062   4.03999   4.05717   4.06357
  Beta virt. eigenvalues --    4.06753   4.09873   4.10092   4.11408   4.11682
  Beta virt. eigenvalues --    4.12981   4.14046   4.15302   4.16247   4.17560
  Beta virt. eigenvalues --    4.19069   4.19282   4.20890   4.22136   4.23020
  Beta virt. eigenvalues --    4.24012   4.24562   4.27342   4.29078   4.30546
  Beta virt. eigenvalues --    4.31431   4.35083   4.37225   4.38084   4.38714
  Beta virt. eigenvalues --    4.39370   4.42596   4.48692   4.50815   4.53154
  Beta virt. eigenvalues --    4.54314   4.54876   4.55832   4.58833   4.62367
  Beta virt. eigenvalues --    4.65846   4.68029   4.69435   4.70022   4.71468
  Beta virt. eigenvalues --    4.74725   4.76361   4.77364   4.79104   4.83829
  Beta virt. eigenvalues --    4.87940   4.91980   4.95195   5.00154   5.01871
  Beta virt. eigenvalues --    5.03688   5.08217   5.10354   5.16688   5.18486
  Beta virt. eigenvalues --    5.21531   5.23201   5.25147   5.27738   5.28924
  Beta virt. eigenvalues --    5.30752   5.37550   5.41223   5.43213   5.47386
  Beta virt. eigenvalues --    5.50745   5.55853   5.57921   5.60522   5.69479
  Beta virt. eigenvalues --    5.76435   5.83192   5.85712   6.03796   6.05683
  Beta virt. eigenvalues --    6.35248   6.38943   6.39379   6.41561   6.42346
  Beta virt. eigenvalues --    6.67629   6.72177   6.73214   6.82419   6.83761
  Beta virt. eigenvalues --    7.01521   7.08739   7.16868   7.35348   7.85404
  Beta virt. eigenvalues --   22.12756  22.54488  22.66796  22.74185  22.80818
  Beta virt. eigenvalues --   22.85565  22.92346  22.94036  22.98721  23.06718
  Beta virt. eigenvalues --   23.24904  23.41329  23.43397  23.98940  44.09636
  Beta virt. eigenvalues --   44.22409
          Condensed to atoms (all electrons):
               1          2          3          4          5          6
     1  C    4.970567   0.433343  -0.033732  -0.061052   0.030991   0.436890
     2  C    0.433343   5.261982   0.366951  -0.049722  -0.150721   0.005846
     3  C   -0.033732   0.366951   5.295961   0.454903  -0.142940  -0.042068
     4  C   -0.061052  -0.049722   0.454903   5.695786   0.218665  -0.017821
     5  C    0.030991  -0.150721  -0.142940   0.218665   5.417052   0.407394
     6  C    0.436890   0.005846  -0.042068  -0.017821   0.407394   4.993586
     7  H    0.421047  -0.035571   0.004665   0.000436   0.005517  -0.034849
     8  H   -0.029652   0.413392  -0.023305   0.012142  -0.000854   0.003174
     9  H    0.006451  -0.002626   0.006647  -0.056472   0.428453  -0.029928
    10  H   -0.037152   0.005571   0.001160   0.005746  -0.037130   0.421645
    11  C   -0.004715   0.014246   0.097044   0.085467  -0.143583   0.017099
    12  O    0.000756  -0.000235   0.001728  -0.254603   0.060301   0.000823
    13  C    0.005386  -0.087504   0.221046   0.025849   0.018853  -0.002507
    14  C    0.003373  -0.007528  -0.175245   0.008862   0.098900  -0.006871
    15  C   -0.003123   0.035707  -0.031640  -0.150466  -0.008447   0.002671
    16  C   -0.000170   0.001514  -0.006297   0.091095  -0.013704   0.000206
    17  C    0.000225  -0.006417   0.055826  -0.012009   0.001572  -0.000113
    18  C   -0.000002  -0.000023   0.001366  -0.004390   0.000149   0.000000
    19  H   -0.000001   0.000006  -0.000247   0.006462  -0.000565   0.000000
    20  C    0.000000   0.000012  -0.001562   0.002701  -0.000179   0.000000
    21  H   -0.000002  -0.000041   0.003168  -0.000688  -0.000031   0.000002
    22  H    0.000000   0.000000   0.000004   0.000007   0.000000   0.000000
    23  Br   0.000000   0.000000  -0.000024   0.000081  -0.000002   0.000000
    24  O   -0.001223   0.033592  -0.165020  -0.003056  -0.000278   0.000415
    25  H   -0.000020  -0.002109   0.019314   0.000016   0.000013   0.000004
               7          8          9         10         11         12
     1  C    0.421047  -0.029652   0.006451  -0.037152  -0.004715   0.000756
     2  C   -0.035571   0.413392  -0.002626   0.005571   0.014246  -0.000235
     3  C    0.004665  -0.023305   0.006647   0.001160   0.097044   0.001728
     4  C    0.000436   0.012142  -0.056472   0.005746   0.085467  -0.254603
     5  C    0.005517  -0.000854   0.428453  -0.037130  -0.143583   0.060301
     6  C   -0.034849   0.003174  -0.029928   0.421645   0.017099   0.000823
     7  H    0.471337  -0.002311  -0.000129  -0.004028   0.000134   0.000002
     8  H   -0.002311   0.463791   0.000044  -0.000195   0.000781   0.000011
     9  H   -0.000129   0.000044   0.467666  -0.003094  -0.015663   0.021258
    10  H   -0.004028  -0.000195  -0.003094   0.475901  -0.000553  -0.000129
    11  C    0.000134   0.000781  -0.015663  -0.000553   5.163831   0.785594
    12  O    0.000002   0.000011   0.021258  -0.000129   0.785594   8.010448
    13  C   -0.000676  -0.024670   0.000097   0.000245  -0.169416  -0.010687
    14  C    0.000008  -0.000372   0.005986  -0.000053  -0.011951  -0.266901
    15  C   -0.000025   0.000306  -0.000125   0.000007   0.075567   0.002860
    16  C    0.000000  -0.000030  -0.000643   0.000003  -0.097946   0.069068
    17  C    0.000002  -0.000081   0.000018   0.000000   0.017524  -0.000573
    18  C    0.000000   0.000004  -0.000003   0.000000   0.003667   0.001345
    19  H    0.000000   0.000000  -0.000053   0.000000  -0.009931   0.022966
    20  C    0.000000  -0.000011  -0.000002   0.000000   0.002282   0.001125
    21  H    0.000000  -0.000020   0.000000   0.000000   0.001113   0.000010
    22  H    0.000000   0.000000   0.000000   0.000000   0.000196   0.000002
    23  Br   0.000000   0.000000   0.000000   0.000000  -0.001791   0.000043
    24  O   -0.000097   0.009989   0.000006   0.000000  -0.000934   0.000001
    25  H    0.000000  -0.000298  -0.000001   0.000000  -0.000015  -0.000001
              13         14         15         16         17         18
     1  C    0.005386   0.003373  -0.003123  -0.000170   0.000225  -0.000002
     2  C   -0.087504  -0.007528   0.035707   0.001514  -0.006417  -0.000023
     3  C    0.221046  -0.175245  -0.031640  -0.006297   0.055826   0.001366
     4  C    0.025849   0.008862  -0.150466   0.091095  -0.012009  -0.004390
     5  C    0.018853   0.098900  -0.008447  -0.013704   0.001572   0.000149
     6  C   -0.002507  -0.006871   0.002671   0.000206  -0.000113   0.000000
     7  H   -0.000676   0.000008  -0.000025   0.000000   0.000002   0.000000
     8  H   -0.024670  -0.000372   0.000306  -0.000030  -0.000081   0.000004
     9  H    0.000097   0.005986  -0.000125  -0.000643   0.000018  -0.000003
    10  H    0.000245  -0.000053   0.000007   0.000003   0.000000   0.000000
    11  C   -0.169416  -0.011951   0.075567  -0.097946   0.017524   0.003667
    12  O   -0.010687  -0.266901   0.002860   0.069068  -0.000573   0.001345
    13  C    5.118799   0.066022   0.322273   0.024717  -0.110849  -0.005845
    14  C    0.066022   5.847511   0.454765   0.068213  -0.017341   0.039200
    15  C    0.322273   0.454765   5.288542  -0.137028   0.332482  -0.041689
    16  C    0.024717   0.068213  -0.137028   5.711102  -0.220497   0.289092
    17  C   -0.110849  -0.017341   0.332482  -0.220497   5.325885   0.072710
    18  C   -0.005845   0.039200  -0.041689   0.289092   0.072710   4.947751
    19  H    0.001044  -0.053699   0.004917   0.425328  -0.005934  -0.041899
    20  C    0.005174  -0.090404  -0.046587   0.096522   0.359796   0.349989
    21  H   -0.005349   0.008238  -0.056104   0.002091   0.402083  -0.001880
    22  H    0.000171  -0.001970   0.005390   0.013986  -0.030892  -0.049345
    23  Br  -0.000157   0.019689  -0.002580  -0.109009   0.021926   0.369222
    24  O    0.415940  -0.000324  -0.110364   0.000264   0.010164  -0.000330
    25  H   -0.020666   0.000366  -0.036535   0.000273   0.019096  -0.000227
              19         20         21         22         23         24
     1  C   -0.000001   0.000000  -0.000002   0.000000   0.000000  -0.001223
     2  C    0.000006   0.000012  -0.000041   0.000000   0.000000   0.033592
     3  C   -0.000247  -0.001562   0.003168   0.000004  -0.000024  -0.165020
     4  C    0.006462   0.002701  -0.000688   0.000007   0.000081  -0.003056
     5  C   -0.000565  -0.000179  -0.000031   0.000000  -0.000002  -0.000278
     6  C    0.000000   0.000000   0.000002   0.000000   0.000000   0.000415
     7  H    0.000000   0.000000   0.000000   0.000000   0.000000  -0.000097
     8  H    0.000000  -0.000011  -0.000020   0.000000   0.000000   0.009989
     9  H   -0.000053  -0.000002   0.000000   0.000000   0.000000   0.000006
    10  H    0.000000   0.000000   0.000000   0.000000   0.000000   0.000000
    11  C   -0.009931   0.002282   0.001113   0.000196  -0.001791  -0.000934
    12  O    0.022966   0.001125   0.000010   0.000002   0.000043   0.000001
    13  C    0.001044   0.005174  -0.005349   0.000171  -0.000157   0.415940
    14  C   -0.053699  -0.090404   0.008238  -0.001970   0.019689  -0.000324
    15  C    0.004917  -0.046587  -0.056104   0.005390  -0.002580  -0.110364
    16  C    0.425328   0.096522   0.002091   0.013986  -0.109009   0.000264
    17  C   -0.005934   0.359796   0.402083  -0.030892   0.021926   0.010164
    18  C   -0.041899   0.349989  -0.001880  -0.049345   0.369222  -0.000330
    19  H    0.450942   0.013910   0.000043   0.000089  -0.005466   0.000007
    20  C    0.013910   5.163576   0.000458   0.420872  -0.098207   0.003086
    21  H    0.000043   0.000458   0.495363  -0.001508  -0.000302  -0.002879
    22  H    0.000089   0.420872  -0.001508   0.459112  -0.007102  -0.000003
    23  Br  -0.005466  -0.098207  -0.000302  -0.007102  34.921281   0.000000
    24  O    0.000007   0.003086  -0.002879  -0.000003   0.000000   7.897082
    25  H    0.000002   0.002188   0.006013   0.000041  -0.000001   0.313115
              25
     1  C   -0.000020
     2  C   -0.002109
     3  C    0.019314
     4  C    0.000016
     5  C    0.000013
     6  C    0.000004
     7  H    0.000000
     8  H   -0.000298
     9  H   -0.000001
    10  H    0.000000
    11  C   -0.000015
    12  O   -0.000001
    13  C   -0.020666
    14  C    0.000366
    15  C   -0.036535
    16  C    0.000273
    17  C    0.019096
    18  C   -0.000227
    19  H    0.000002
    20  C    0.002188
    21  H    0.006013
    22  H    0.000041
    23  Br  -0.000001
    24  O    0.313115
    25  H    0.338131
          Atomic-Atomic Spin Densities.
               1          2          3          4          5          6
     1  C   -0.066887   0.015955  -0.001658   0.006544  -0.000900  -0.017080
     2  C    0.015955   0.145461  -0.027591   0.008373  -0.001698  -0.006277
     3  C   -0.001658  -0.027591  -0.103332  -0.020916   0.004798   0.003566
     4  C    0.006544   0.008373  -0.020916   0.145073  -0.012109  -0.012029
     5  C   -0.000900  -0.001698   0.004798  -0.012109  -0.054868   0.019056
     6  C   -0.017080  -0.006277   0.003566  -0.012029   0.019056   0.126809
     7  H    0.000068   0.000104  -0.000035  -0.000060  -0.000011  -0.001023
     8  H    0.000230   0.001463  -0.000954   0.000194  -0.000053   0.000199
     9  H   -0.000093   0.000051  -0.000003  -0.000118   0.000750  -0.000220
    10  H   -0.000719   0.000162  -0.000003  -0.000135   0.000705   0.000066
    11  C   -0.000025  -0.000986  -0.005944   0.026948   0.005488   0.000085
    12  O   -0.000018  -0.000059  -0.000334  -0.007609   0.001938   0.000046
    13  C   -0.001442  -0.012466   0.054497  -0.019890  -0.000337   0.000751
    14  C    0.000339  -0.000245  -0.006126   0.016196  -0.000925  -0.000674
    15  C   -0.000532   0.000358  -0.000554  -0.008171  -0.001429   0.000478
    16  C   -0.000003  -0.000029  -0.000997  -0.000593   0.000466   0.000006
    17  C    0.000019   0.000127  -0.001210   0.000802  -0.000051  -0.000006
    18  C    0.000000  -0.000010   0.000312  -0.000647   0.000007   0.000001
    19  H    0.000000  -0.000001  -0.000025  -0.000152   0.000042   0.000000
    20  C   -0.000001   0.000022  -0.000271   0.000197  -0.000001   0.000000
    21  H    0.000001  -0.000013   0.000008   0.000026   0.000001   0.000000
    22  H    0.000000   0.000000   0.000000   0.000001   0.000000   0.000000
    23  Br   0.000000   0.000000  -0.000002   0.000004   0.000000   0.000000
    24  O    0.000276   0.006791  -0.002018   0.000495   0.000010  -0.000092
    25  H    0.000002   0.000036  -0.000277  -0.000047   0.000000   0.000000
               7          8          9         10         11         12
     1  C    0.000068   0.000230  -0.000093  -0.000719  -0.000025  -0.000018
     2  C    0.000104   0.001463   0.000051   0.000162  -0.000986  -0.000059
     3  C   -0.000035  -0.000954  -0.000003  -0.000003  -0.005944  -0.000334
     4  C   -0.000060   0.000194  -0.000118  -0.000135   0.026948  -0.007609
     5  C   -0.000011  -0.000053   0.000750   0.000705   0.005488   0.001938
     6  C   -0.001023   0.000199  -0.000220   0.000066   0.000085   0.000046
     7  H    0.001498  -0.000079   0.000000  -0.000021  -0.000006   0.000000
     8  H   -0.000079  -0.002825  -0.000002   0.000002  -0.000022   0.000000
     9  H    0.000000  -0.000002   0.000976  -0.000008   0.000764  -0.001064
    10  H   -0.000021   0.000002  -0.000008  -0.003033  -0.000011   0.000003
    11  C   -0.000006  -0.000022   0.000764  -0.000011  -0.068424  -0.034965
    12  O    0.000000   0.000000  -0.001064   0.000003  -0.034965   0.226257
    13  C    0.000021  -0.000016  -0.000043   0.000002   0.018992   0.000661
    14  C    0.000003  -0.000018  -0.000194  -0.000002   0.029476  -0.008684
    15  C   -0.000005   0.000110  -0.000026   0.000002  -0.005678  -0.000105
    16  C    0.000000   0.000002   0.000043   0.000000   0.006073   0.001778
    17  C    0.000000  -0.000003  -0.000001   0.000000  -0.002313  -0.000054
    18  C    0.000000   0.000000  -0.000001   0.000000  -0.000011  -0.000151
    19  H    0.000000   0.000000   0.000004   0.000000   0.000898  -0.001109
    20  C    0.000000   0.000001   0.000000   0.000000   0.000259  -0.000033
    21  H    0.000000   0.000000   0.000000   0.000000  -0.000069   0.000000
    22  H    0.000000   0.000000   0.000000   0.000000  -0.000003   0.000000
    23  Br   0.000000   0.000000   0.000000   0.000000  -0.000003  -0.000009
    24  O    0.000002  -0.000705   0.000000   0.000000   0.000030  -0.000002
    25  H    0.000000   0.000012   0.000000   0.000000   0.000019   0.000000
              13         14         15         16         17         18
     1  C   -0.001442   0.000339  -0.000532  -0.000003   0.000019   0.000000
     2  C   -0.012466  -0.000245   0.000358  -0.000029   0.000127  -0.000010
     3  C    0.054497  -0.006126  -0.000554  -0.000997  -0.001210   0.000312
     4  C   -0.019890   0.016196  -0.008171  -0.000593   0.000802  -0.000647
     5  C   -0.000337  -0.000925  -0.001429   0.000466  -0.000051   0.000007
     6  C    0.000751  -0.000674   0.000478   0.000006  -0.000006   0.000001
     7  H    0.000021   0.000003  -0.000005   0.000000   0.000000   0.000000
     8  H   -0.000016  -0.000018   0.000110   0.000002  -0.000003   0.000000
     9  H   -0.000043  -0.000194  -0.000026   0.000043  -0.000001  -0.000001
    10  H    0.000002  -0.000002   0.000002   0.000000   0.000000   0.000000
    11  C    0.018992   0.029476  -0.005678   0.006073  -0.002313  -0.000011
    12  O    0.000661  -0.008684  -0.000105   0.001778  -0.000054  -0.000151
    13  C    0.450401  -0.019814   0.065314  -0.001020  -0.012558   0.000722
    14  C   -0.019814   0.173618  -0.030407  -0.017765   0.014940  -0.008965
    15  C    0.065314  -0.030407  -0.088316   0.005065  -0.035118   0.005233
    16  C   -0.001020  -0.017765   0.005065  -0.061071  -0.000643   0.014204
    17  C   -0.012558   0.014940  -0.035118  -0.000643   0.149570  -0.009533
    18  C    0.000722  -0.008965   0.005233   0.014204  -0.009533   0.149393
    19  H   -0.000064   0.000459  -0.000111   0.000718   0.000127  -0.000739
    20  C   -0.001349   0.005652  -0.002761  -0.000594   0.019914  -0.015384
    21  H    0.000448   0.000156  -0.001770   0.000032   0.001109   0.000185
    22  H    0.000028  -0.000071  -0.000110  -0.000100   0.000384  -0.000924
    23  Br  -0.000010   0.000850  -0.000198  -0.000376   0.000496  -0.012436
    24  O   -0.095364   0.000796  -0.000571  -0.000028   0.004991  -0.000043
    25  H   -0.000274  -0.000124   0.000181  -0.000021   0.000612   0.000017
              19         20         21         22         23         24
     1  C    0.000000  -0.000001   0.000001   0.000000   0.000000   0.000276
     2  C   -0.000001   0.000022  -0.000013   0.000000   0.000000   0.006791
     3  C   -0.000025  -0.000271   0.000008   0.000000  -0.000002  -0.002018
     4  C   -0.000152   0.000197   0.000026   0.000001   0.000004   0.000495
     5  C    0.000042  -0.000001   0.000001   0.000000   0.000000   0.000010
     6  C    0.000000   0.000000   0.000000   0.000000   0.000000  -0.000092
     7  H    0.000000   0.000000   0.000000   0.000000   0.000000   0.000002
     8  H    0.000000   0.000001   0.000000   0.000000   0.000000  -0.000705
     9  H    0.000004   0.000000   0.000000   0.000000   0.000000   0.000000
    10  H    0.000000   0.000000   0.000000   0.000000   0.000000   0.000000
    11  C    0.000898   0.000259  -0.000069  -0.000003  -0.000003   0.000030
    12  O   -0.001109  -0.000033   0.000000   0.000000  -0.000009  -0.000002
    13  C   -0.000064  -0.001349   0.000448   0.000028  -0.000010  -0.095364
    14  C    0.000459   0.005652   0.000156  -0.000071   0.000850   0.000796
    15  C   -0.000111  -0.002761  -0.001770  -0.000110  -0.000198  -0.000571
    16  C    0.000718  -0.000594   0.000032  -0.000100  -0.000376  -0.000028
    17  C    0.000127   0.019914   0.001109   0.000384   0.000496   0.004991
    18  C   -0.000739  -0.015384   0.000185  -0.000924  -0.012436  -0.000043
    19  H    0.000196  -0.000228   0.000000   0.000000  -0.000042   0.000000
    20  C   -0.000228  -0.073733   0.000359  -0.000041   0.002848   0.000075
    21  H    0.000000   0.000359  -0.003425  -0.000072   0.000000  -0.000152
    22  H    0.000000  -0.000041  -0.000072   0.001260   0.000032   0.000000
    23  Br  -0.000042   0.002848   0.000000   0.000032   0.015812   0.000000
    24  O    0.000000   0.000075  -0.000152   0.000000   0.000000   0.180610
    25  H    0.000000  -0.000028  -0.000050  -0.000003   0.000000   0.000202
              25
     1  C    0.000002
     2  C    0.000036
     3  C   -0.000277
     4  C   -0.000047
     5  C    0.000000
     6  C    0.000000
     7  H    0.000000
     8  H    0.000012
     9  H    0.000000
    10  H    0.000000
    11  C    0.000019
    12  O    0.000000
    13  C   -0.000274
    14  C   -0.000124
    15  C    0.000181
    16  C   -0.000021
    17  C    0.000612
    18  C    0.000017
    19  H    0.000000
    20  C   -0.000028
    21  H   -0.000050
    22  H   -0.000003
    23  Br   0.000000
    24  O    0.000202
    25  H   -0.003398
 Mulliken charges and spin densities:
               1          2
     1  C   -0.138185  -0.065925
     2  C   -0.229666   0.129527
     3  C    0.092298  -0.109069
     4  C    0.002059   0.122378
     5  C   -0.189425  -0.039121
     6  C   -0.155599   0.113661
     7  H    0.174540   0.000455
     8  H    0.178166  -0.002464
     9  H    0.172115   0.000817
    10  H    0.172056  -0.002989
    11  C    0.191954  -0.029427
    12  O   -0.445211   0.176487
    13  C    0.212711   0.427190
    14  C    0.011526   0.148471
    15  C    0.099227  -0.099122
    16  C   -0.208151  -0.054853
    17  C   -0.214603   0.131599
    18  C    0.071139   0.121230
    19  H    0.192078  -0.000027
    20  C   -0.184740  -0.065097
    21  H    0.150219  -0.003228
    22  H    0.190950   0.000380
    23  Br  -0.107603   0.006966
    24  O   -0.399155   0.095302
    25  H    0.361301  -0.003141
 Sum of Mulliken charges =   0.00000   1.00000
 Mulliken charges and spin densities with hydrogens summed into heavy atoms:
               1          2
     1  C    0.036355  -0.065470
     2  C   -0.051500   0.127063
     3  C    0.092298  -0.109069
     4  C    0.002059   0.122378
     5  C   -0.017310  -0.038304
     6  C    0.016457   0.110672
    11  C    0.191954  -0.029427
    12  O   -0.445211   0.176487
    13  C    0.212711   0.427190
    14  C    0.011526   0.148471
    15  C    0.099227  -0.099122
    16  C   -0.016074  -0.054879
    17  C   -0.064384   0.128371
    18  C    0.071139   0.121230
    20  C    0.006210  -0.064717
    23  Br  -0.107603   0.006966
    24  O   -0.037854   0.092161
 Electronic spatial extent (au):  <R**2>=           6272.5559
 Charge=              0.0000 electrons
 Dipole moment (field-independent basis, Debye):
    X=              2.1324    Y=              7.3206    Z=             -0.0001  Tot=              7.6248
 Quadrupole moment (field-independent basis, Debye-Ang):
   XX=            -96.5567   YY=           -102.2328   ZZ=           -114.4412
   XY=             -2.6691   XZ=              0.0001   YZ=             -0.0001
 Traceless Quadrupole moment (field-independent basis, Debye-Ang):
   XX=              7.8535   YY=              2.1774   ZZ=            -10.0310
   XY=             -2.6691   XZ=              0.0001   YZ=             -0.0001
 Octapole moment (field-independent basis, Debye-Ang**2):
  XXX=             -8.1432  YYY=             75.7206  ZZZ=             -0.0044  XYY=            -45.2897
  XXY=            -10.2597  XXZ=             -0.0027  XZZ=            -51.9371  YZZ=             -3.2657
  YYZ=             -0.0035  XYZ=              0.0011
 Hexadecapole moment (field-independent basis, Debye-Ang**3):
 XXXX=          -5320.1347 YYYY=          -1242.1670 ZZZZ=           -128.9921 XXXY=             -1.7837
 XXXZ=             -0.0740 YYYX=             53.2988 YYYZ=              0.0059 ZZZX=             -0.0779
 ZZZY=              0.0072 XXYY=          -1143.3227 XXZZ=          -1106.6872 YYZZ=           -262.4132
 XXYZ=             -0.0010 YYXZ=             -0.0220 ZZXY=             31.2249
 N-N= 1.392099493419D+03 E-N=-1.054041430459D+04  KE= 3.256042009379D+03
 1|1|UNPC-SHENGFULIAO-PC|SP|UM062X TD-FC|Gen|C14H8Br1O2(2)|SHENGFU LIAO
 |22-Jul-2020|0||# td=(triplets,nstates=5,root=1) um062x/gen scrf=(solv
 ent=acetonitrile) geom=connectivity empiricaldispersion=gd3||HT2||0,2|
 C,0,5.086926,0.025686,0.000035|C,0,4.035299,0.958905,0.000062|C,0,2.70
 9132,0.51782,0.000097|C,0,2.409285,-0.870303,0.000094|C,0,3.462226,-1.
 779569,0.00008|C,0,4.79562,-1.327702,0.000046|H,0,6.113829,0.370441,0.
 000009|H,0,4.248052,2.019567,0.000058|H,0,3.234227,-2.837281,0.000096|
 H,0,5.601207,-2.054084,0.000029|C,0,1.013083,-1.336849,0.000125|O,0,0.
 747727,-2.560914,0.000096|C,0,1.615162,1.454601,0.000148|C,0,-0.05767,
 -0.338893,0.000065|C,0,0.230536,1.056914,0.00005|C,0,-1.392531,-0.7545
 04,0.000022|C,0,-0.811927,1.987689,-0.000063|C,0,-2.415653,0.213319,-0
 .000067|H,0,-1.6144,-1.811361,0.000052|C,0,-2.163469,1.566228,-0.00011
 9|H,0,-0.633144,3.057409,-0.000129|H,0,-2.962912,2.293756,-0.000202|Br
 ,0,-4.229044,-0.396581,-0.000138|O,0,1.967367,2.720316,0.000079|H,0,1.
 212823,3.326638,0.000062||Version=IA32W-G09RevD.01|State=2-A|HF=-3262.
 936451|S2=0.779698|S2-1=0.|S2A=0.750633|RMSD=3.947e-009|PG=C01 [X(C14H
 8Br1O2)]||@


 NATURE GIVES TO EVERY TIME AND SEASON SOME BEAUTY OF ITS OWN.

                                                    --DICKENS
 Job cpu time:       0 days  9 hours 26 minutes 41.0 seconds.
 File lengths (MBytes):  RWF=    769 Int=      0 D2E=      0 Chk=     80 Scr=      1
 Normal termination of Gaussian 09 at Wed Jul 22 06:48:25 2020.
