# Supplementary material for: 2-Bromoanthraquinone as a highly efficient photocatalyst for the oxidation of sec-aromatic alcohols: experimental and DFT study
Source: Royal Society of Chemistry journal article supplement (doi:10.1039/d0ra06414a), 2020-01-01
Supplement: d0ra06414a7.out [file d0ra06414a7.out]

 Entering Link 1 = C:\software\gaussian\G09W\l1.exe PID=      7304.
  
 Copyright (c) 1988,1990,1992,1993,1995,1998,2003,2009,2013,
            Gaussian, Inc.  All Rights Reserved.
  
 This is part of the Gaussian(R) 09 program.  It is based on
 the Gaussian(R) 03 system (copyright 2003, Gaussian, Inc.),
 the Gaussian(R) 98 system (copyright 1998, Gaussian, Inc.),
 the Gaussian(R) 94 system (copyright 1995, Gaussian, Inc.),
 the Gaussian 92(TM) system (copyright 1992, Gaussian, Inc.),
 the Gaussian 90(TM) system (copyright 1990, Gaussian, Inc.),
 the Gaussian 88(TM) system (copyright 1988, Gaussian, Inc.),
 the Gaussian 86(TM) system (copyright 1986, Carnegie Mellon
 University), and the Gaussian 82(TM) system (copyright 1983,
 Carnegie Mellon University). Gaussian is a federally registered
 trademark of Gaussian, Inc.
  
 This software contains proprietary and confidential information,
 including trade secrets, belonging to Gaussian, Inc.
  
 This software is provided under written license and may be
 used, copied, transmitted, or stored only in accord with that
 written license.
  
 The following legend is applicable only to US Government
 contracts under FAR:
  
                    RESTRICTED RIGHTS LEGEND
  
 Use, reproduction and disclosure by the US Government is
 subject to restrictions as set forth in subparagraphs (a)
 and (c) of the Commercial Computer Software - Restricted
 Rights clause in FAR 52.227-19.
  
 Gaussian, Inc.
 340 Quinnipiac St., Bldg. 40, Wallingford CT 06492
  
  
 ---------------------------------------------------------------
 Warning -- This program may not be used in any manner that
 competes with the business of Gaussian, Inc. or will provide
 assistance to any competitor of Gaussian, Inc.  The licensee
 of this program is prohibited from giving any competitor of
 Gaussian, Inc. access to this program.  By using this program,
 the user acknowledges that Gaussian, Inc. is engaged in the
 business of creating and licensing software in the field of
 computational chemistry and represents and warrants to the
 licensee that it is not a competitor of Gaussian, Inc. and that
 it will not use this program in any manner prohibited above.
 ---------------------------------------------------------------
  

 Cite this work as:
 Gaussian 09, Revision D.01,
 M. J. Frisch, G. W. Trucks, H. B. Schlegel, G. E. Scuseria, 
 M. A. Robb, J. R. Cheeseman, G. Scalmani, V. Barone, B. Mennucci, 
 G. A. Petersson, H. Nakatsuji, M. Caricato, X. Li, H. P. Hratchian, 
 A. F. Izmaylov, J. Bloino, G. Zheng, J. L. Sonnenberg, M. Hada, 
 M. Ehara, K. Toyota, R. Fukuda, J. Hasegawa, M. Ishida, T. Nakajima, 
 Y. Honda, O. Kitao, H. Nakai, T. Vreven, J. A. Montgomery, Jr., 
 J. E. Peralta, F. Ogliaro, M. Bearpark, J. J. Heyd, E. Brothers, 
 K. N. Kudin, V. N. Staroverov, T. Keith, R. Kobayashi, J. Normand, 
 K. Raghavachari, A. Rendell, J. C. Burant, S. S. Iyengar, J. Tomasi, 
 M. Cossi, N. Rega, J. M. Millam, M. Klene, J. E. Knox, J. B. Cross, 
 V. Bakken, C. Adamo, J. Jaramillo, R. Gomperts, R. E. Stratmann, 
 O. Yazyev, A. J. Austin, R. Cammi, C. Pomelli, J. W. Ochterski, 
 R. L. Martin, K. Morokuma, V. G. Zakrzewski, G. A. Voth, 
 P. Salvador, J. J. Dannenberg, S. Dapprich, A. D. Daniels, 
 O. Farkas, J. B. Foresman, J. V. Ortiz, J. Cioslowski, 
 and D. J. Fox, Gaussian, Inc., Wallingford CT, 2013.
 
 ******************************************
 Gaussian 09:  IA32W-G09RevD.01 24-Apr-2013
                20-Jul-2020 
 ******************************************
 %nprocshared=4
 Will use up to    4 processors via shared memory.
 %mem=1500MB
 %chk=C:\Users\Shengfu Liao\Desktop\suppliment.chk
 ----------------------------------------------------------------------
 # opt td=(triplet,nstates=5,root=1) ub3lyp/6-311g(d) scrf=(solvent=ace
 tonitrile) geom=connectivity empiricaldispersion=gd3bj
 ----------------------------------------------------------------------
 1/14=-1,18=20,19=15,26=3,38=1,57=2/1,3;
 2/9=110,12=2,17=6,18=5,40=1/2;
 3/5=4,6=6,7=1,11=2,16=1,25=1,30=1,70=2201,71=1,72=2,74=-5,116=2,124=41/1,2,8,3;
 4//1;
 5/5=2,38=5,53=2/2;
 8/6=1,10=2,107=1,108=5/1;
 9/8=1,15=2,41=5,42=1,48=3,70=2/14;
 10/5=4/2;
 6/7=2,8=2,9=2,10=2/1;
 7/12=6,13=5,14=1/1,2,3,16;
 1/14=-1,18=20,19=15,26=3/3(2);
 2/9=110/2;
 99//99;
 2/9=110/2;
 3/5=4,6=6,7=1,11=2,16=1,25=1,30=1,70=2205,71=1,72=2,74=-5,116=2,124=41/1,2,8,3;
 4/5=5,16=3,69=1/1;
 5/5=2,38=5,53=2/2;
 8/6=1,10=2,107=1,108=5/1;
 9/8=1,15=2,41=5,42=1,48=3,49=4,70=2/14;
 10/5=4/2;
 7/12=6,13=5,14=1/1,2,3,16;
 1/14=-1,18=20,19=15,26=3/3(-8);
 2/9=110/2;
 6/7=2,8=2,9=2,10=2/1;
 99//99;
 -------------------------
 2-BrHAQ excited state opt
 -------------------------
 Symbolic Z-matrix:
 Charge =  0 Multiplicity = 2
 C                    -5.09246   0.05399  0. 
 C                    -4.05731   0.98245   0.00012 
 C                    -2.72667   0.55532   0.00009 
 C                    -2.4384   -0.82296  -0.00008 
 C                    -3.48579  -1.74855  -0.00019 
 C                    -4.80632  -1.3135   -0.00016 
 H                    -6.12235   0.39328   0.00003 
 H                    -4.26299   2.04594   0.00025 
 H                    -3.24791  -2.8053   -0.00032 
 H                    -5.61369  -2.03729  -0.00025 
 C                    -1.03524  -1.31905  -0.00018 
 O                    -0.77807  -2.51315   0.00049 
 C                    -1.63933   1.57335   0.00029 
 C                     0.05427  -0.2972   -0.00002 
 C                    -0.23418   1.07795   0.00015 
 C                     1.38047  -0.73505  -0.00008 
 C                     0.81577   2.00025   0.00024 
 C                     2.40417   0.20188   0.00002 
 H                     1.58379  -1.79782  -0.00021 
 C                     2.13696   1.57193   0.00017 
 H                     0.58466   3.05837   0.00037 
 H                     2.94629   2.29119   0.00024 
 Br                    4.22262  -0.39691  -0.00008 
 O                    -1.88631   2.77043  -0.00044 
 H                    -1.06455   3.26672  -0.00074 
 

 GradGradGradGradGradGradGradGradGradGradGradGradGradGradGradGradGradGrad
 Berny optimization.
 Initialization pass.
                           ----------------------------
                           !    Initial Parameters    !
                           ! (Angstroms and Degrees)  !
 --------------------------                            --------------------------
 ! Name  Definition              Value          Derivative Info.                !
 --------------------------------------------------------------------------------
 ! R1    R(1,2)                  1.3905         estimate D2E/DX2                !
 ! R2    R(1,6)                  1.3971         estimate D2E/DX2                !
 ! R3    R(1,7)                  1.0843         estimate D2E/DX2                !
 ! R4    R(2,3)                  1.3975         estimate D2E/DX2                !
 ! R5    R(2,8)                  1.0832         estimate D2E/DX2                !
 ! R6    R(3,4)                  1.4081         estimate D2E/DX2                !
 ! R7    R(3,13)                 1.4895         estimate D2E/DX2                !
 ! R8    R(4,5)                  1.3978         estimate D2E/DX2                !
 ! R9    R(4,11)                 1.4883         estimate D2E/DX2                !
 ! R10   R(5,6)                  1.3903         estimate D2E/DX2                !
 ! R11   R(5,9)                  1.0832         estimate D2E/DX2                !
 ! R12   R(6,10)                 1.0843         estimate D2E/DX2                !
 ! R13   R(11,12)                1.2215         estimate D2E/DX2                !
 ! R14   R(11,14)                1.4937         estimate D2E/DX2                !
 ! R15   R(13,15)                1.4899         estimate D2E/DX2                !
 ! R16   R(13,24)                1.2223         estimate D2E/DX2                !
 ! R17   R(14,15)                1.4051         estimate D2E/DX2                !
 ! R18   R(14,16)                1.3966         estimate D2E/DX2                !
 ! R19   R(15,17)                1.3975         estimate D2E/DX2                !
 ! R20   R(16,18)                1.3877         estimate D2E/DX2                !
 ! R21   R(16,19)                1.082          estimate D2E/DX2                !
 ! R22   R(17,20)                1.3889         estimate D2E/DX2                !
 ! R23   R(17,21)                1.0831         estimate D2E/DX2                !
 ! R24   R(18,20)                1.3959         estimate D2E/DX2                !
 ! R25   R(18,23)                1.9145         estimate D2E/DX2                !
 ! R26   R(20,22)                1.0827         estimate D2E/DX2                !
 ! R27   R(24,25)                0.96           estimate D2E/DX2                !
 ! A1    A(2,1,6)              120.0716         estimate D2E/DX2                !
 ! A2    A(2,1,7)              119.8762         estimate D2E/DX2                !
 ! A3    A(6,1,7)              120.0522         estimate D2E/DX2                !
 ! A4    A(1,2,3)              120.3135         estimate D2E/DX2                !
 ! A5    A(1,2,8)              120.9437         estimate D2E/DX2                !
 ! A6    A(3,2,8)              118.7427         estimate D2E/DX2                !
 ! A7    A(2,3,4)              119.61           estimate D2E/DX2                !
 ! A8    A(2,3,13)             119.0886         estimate D2E/DX2                !
 ! A9    A(4,3,13)             121.3015         estimate D2E/DX2                !
 ! A10   A(3,4,5)              119.6541         estimate D2E/DX2                !
 ! A11   A(3,4,11)             121.2846         estimate D2E/DX2                !
 ! A12   A(5,4,11)             119.0614         estimate D2E/DX2                !
 ! A13   A(4,5,6)              120.2978         estimate D2E/DX2                !
 ! A14   A(4,5,9)              118.781          estimate D2E/DX2                !
 ! A15   A(6,5,9)              120.9213         estimate D2E/DX2                !
 ! A16   A(1,6,5)              120.0531         estimate D2E/DX2                !
 ! A17   A(1,6,10)             120.0576         estimate D2E/DX2                !
 ! A18   A(5,6,10)             119.8893         estimate D2E/DX2                !
 ! A19   A(4,11,12)            121.6253         estimate D2E/DX2                !
 ! A20   A(4,11,14)            117.364          estimate D2E/DX2                !
 ! A21   A(12,11,14)           121.0107         estimate D2E/DX2                !
 ! A22   A(3,13,15)            117.4646         estimate D2E/DX2                !
 ! A23   A(3,13,24)            121.4572         estimate D2E/DX2                !
 ! A24   A(15,13,24)           121.0782         estimate D2E/DX2                !
 ! A25   A(11,14,15)           121.3184         estimate D2E/DX2                !
 ! A26   A(11,14,16)           118.5644         estimate D2E/DX2                !
 ! A27   A(15,14,16)           120.1171         estimate D2E/DX2                !
 ! A28   A(13,15,14)           121.2669         estimate D2E/DX2                !
 ! A29   A(13,15,17)           119.2824         estimate D2E/DX2                !
 ! A30   A(14,15,17)           119.4507         estimate D2E/DX2                !
 ! A31   A(14,16,18)           119.2632         estimate D2E/DX2                !
 ! A32   A(14,16,19)           119.1012         estimate D2E/DX2                !
 ! A33   A(18,16,19)           121.6356         estimate D2E/DX2                !
 ! A34   A(15,17,20)           120.7409         estimate D2E/DX2                !
 ! A35   A(15,17,21)           118.9765         estimate D2E/DX2                !
 ! A36   A(20,17,21)           120.2826         estimate D2E/DX2                !
 ! A37   A(16,18,20)           121.4299         estimate D2E/DX2                !
 ! A38   A(16,18,23)           119.3081         estimate D2E/DX2                !
 ! A39   A(20,18,23)           119.2619         estimate D2E/DX2                !
 ! A40   A(17,20,18)           118.9981         estimate D2E/DX2                !
 ! A41   A(17,20,22)           120.4098         estimate D2E/DX2                !
 ! A42   A(18,20,22)           120.5921         estimate D2E/DX2                !
 ! A43   A(13,24,25)           109.4712         estimate D2E/DX2                !
 ! D1    D(6,1,2,3)              0.0            estimate D2E/DX2                !
 ! D2    D(6,1,2,8)           -179.9991         estimate D2E/DX2                !
 ! D3    D(7,1,2,3)            179.9997         estimate D2E/DX2                !
 ! D4    D(7,1,2,8)              0.0005         estimate D2E/DX2                !
 ! D5    D(2,1,6,5)             -0.0004         estimate D2E/DX2                !
 ! D6    D(2,1,6,10)          -180.0            estimate D2E/DX2                !
 ! D7    D(7,1,6,5)            180.0            estimate D2E/DX2                !
 ! D8    D(7,1,6,10)             0.0004         estimate D2E/DX2                !
 ! D9    D(1,2,3,4)              0.0007         estimate D2E/DX2                !
 ! D10   D(1,2,3,13)          -179.9971         estimate D2E/DX2                !
 ! D11   D(8,2,3,4)            179.9998         estimate D2E/DX2                !
 ! D12   D(8,2,3,13)             0.002          estimate D2E/DX2                !
 ! D13   D(2,3,4,5)             -0.001          estimate D2E/DX2                !
 ! D14   D(2,3,4,11)           179.9967         estimate D2E/DX2                !
 ! D15   D(13,3,4,5)           179.9967         estimate D2E/DX2                !
 ! D16   D(13,3,4,11)           -0.0056         estimate D2E/DX2                !
 ! D17   D(2,3,13,15)         -179.9955         estimate D2E/DX2                !
 ! D18   D(2,3,13,24)           -0.0505         estimate D2E/DX2                !
 ! D19   D(4,3,13,15)            0.0068         estimate D2E/DX2                !
 ! D20   D(4,3,13,24)          179.9517         estimate D2E/DX2                !
 ! D21   D(3,4,5,6)              0.0007         estimate D2E/DX2                !
 ! D22   D(3,4,5,9)            179.9998         estimate D2E/DX2                !
 ! D23   D(11,4,5,6)          -179.9971         estimate D2E/DX2                !
 ! D24   D(11,4,5,9)             0.002          estimate D2E/DX2                !
 ! D25   D(3,4,11,12)          179.9546         estimate D2E/DX2                !
 ! D26   D(3,4,11,14)            0.0039         estimate D2E/DX2                !
 ! D27   D(5,4,11,12)           -0.0476         estimate D2E/DX2                !
 ! D28   D(5,4,11,14)         -179.9983         estimate D2E/DX2                !
 ! D29   D(4,5,6,1)              0.0            estimate D2E/DX2                !
 ! D30   D(4,5,6,10)           179.9996         estimate D2E/DX2                !
 ! D31   D(9,5,6,1)           -179.9991         estimate D2E/DX2                !
 ! D32   D(9,5,6,10)             0.0005         estimate D2E/DX2                !
 ! D33   D(4,11,14,15)          -0.004          estimate D2E/DX2                !
 ! D34   D(4,11,14,16)         179.9983         estimate D2E/DX2                !
 ! D35   D(12,11,14,15)       -179.955          estimate D2E/DX2                !
 ! D36   D(12,11,14,16)          0.0473         estimate D2E/DX2                !
 ! D37   D(3,13,15,14)          -0.0068         estimate D2E/DX2                !
 ! D38   D(3,13,15,17)         179.9955         estimate D2E/DX2                !
 ! D39   D(24,13,15,14)       -179.952          estimate D2E/DX2                !
 ! D40   D(24,13,15,17)          0.0503         estimate D2E/DX2                !
 ! D41   D(3,13,24,25)        -179.9629         estimate D2E/DX2                !
 ! D42   D(15,13,24,25)         -0.0199         estimate D2E/DX2                !
 ! D43   D(11,14,15,13)          0.0056         estimate D2E/DX2                !
 ! D44   D(11,14,15,17)       -179.9967         estimate D2E/DX2                !
 ! D45   D(16,14,15,13)       -179.9967         estimate D2E/DX2                !
 ! D46   D(16,14,15,17)          0.0009         estimate D2E/DX2                !
 ! D47   D(11,14,16,18)        179.9971         estimate D2E/DX2                !
 ! D48   D(11,14,16,19)         -0.002          estimate D2E/DX2                !
 ! D49   D(15,14,16,18)         -0.0006         estimate D2E/DX2                !
 ! D50   D(15,14,16,19)       -179.9998         estimate D2E/DX2                !
 ! D51   D(13,15,17,20)        179.9972         estimate D2E/DX2                !
 ! D52   D(13,15,17,21)         -0.002          estimate D2E/DX2                !
 ! D53   D(14,15,17,20)         -0.0006         estimate D2E/DX2                !
 ! D54   D(14,15,17,21)       -179.9997         estimate D2E/DX2                !
 ! D55   D(14,16,18,20)         -0.0001         estimate D2E/DX2                !
 ! D56   D(14,16,18,23)       -179.9996         estimate D2E/DX2                !
 ! D57   D(19,16,18,20)        179.999          estimate D2E/DX2                !
 ! D58   D(19,16,18,23)         -0.0005         estimate D2E/DX2                !
 ! D59   D(15,17,20,18)         -0.0001         estimate D2E/DX2                !
 ! D60   D(15,17,20,22)       -179.9997         estimate D2E/DX2                !
 ! D61   D(21,17,20,18)        179.999          estimate D2E/DX2                !
 ! D62   D(21,17,20,22)         -0.0005         estimate D2E/DX2                !
 ! D63   D(16,18,20,17)          0.0005         estimate D2E/DX2                !
 ! D64   D(16,18,20,22)       -180.0            estimate D2E/DX2                !
 ! D65   D(23,18,20,17)       -180.0            estimate D2E/DX2                !
 ! D66   D(23,18,20,22)         -0.0005         estimate D2E/DX2                !
 --------------------------------------------------------------------------------
 Trust Radius=3.00D-01 FncErr=1.00D-07 GrdErr=1.00D-06
 Number of steps in this run=    146 maximum allowed number of steps=    150.
 GradGradGradGradGradGradGradGradGradGradGradGradGradGradGradGradGradGrad

                          Input orientation:                          
 ---------------------------------------------------------------------
 Center     Atomic      Atomic             Coordinates (Angstroms)
 Number     Number       Type             X           Y           Z
 ---------------------------------------------------------------------
      1          6           0       -5.092459    0.053994   -0.000003
      2          6           0       -4.057305    0.982453    0.000120
      3          6           0       -2.726668    0.555318    0.000092
      4          6           0       -2.438397   -0.822959   -0.000076
      5          6           0       -3.485792   -1.748553   -0.000191
      6          6           0       -4.806321   -1.313495   -0.000155
      7          1           0       -6.122347    0.393280    0.000025
      8          1           0       -4.262988    2.045942    0.000253
      9          1           0       -3.247908   -2.805296   -0.000323
     10          1           0       -5.613686   -2.037287   -0.000251
     11          6           0       -1.035242   -1.319050   -0.000184
     12          8           0       -0.778071   -2.513152    0.000494
     13          6           0       -1.639333    1.573354    0.000292
     14          6           0        0.054265   -0.297196   -0.000016
     15          6           0       -0.234178    1.077952    0.000151
     16          6           0        1.380467   -0.735047   -0.000077
     17          6           0        0.815765    2.000252    0.000235
     18          6           0        2.404168    0.201883    0.000016
     19          1           0        1.583786   -1.797823   -0.000210
     20          6           0        2.136964    1.571934    0.000167
     21          1           0        0.584661    3.058370    0.000368
     22          1           0        2.946285    2.291192    0.000238
     23         35           0        4.222619   -0.396905   -0.000078
     24          8           0       -1.886312    2.770432   -0.000440
     25          1           0       -1.064545    3.266717   -0.000743
 ---------------------------------------------------------------------
                    Distance matrix (angstroms):
                    1          2          3          4          5
     1  C    0.000000
     2  C    1.390532   0.000000
     3  C    2.418324   1.397512   0.000000
     4  C    2.795191   2.424949   1.408101   0.000000
     5  C    2.414654   2.790165   2.425715   1.397770   0.000000
     6  C    1.397105   2.415037   2.795965   2.418200   1.390350
     7  H    1.084336   2.147446   3.399543   3.879526   3.396891
     8  H    2.157749   1.083196   2.140617   3.399960   3.873271
     9  H    3.402632   3.873263   3.400797   2.141254   1.083187
    10  H    2.155257   3.397227   3.880267   3.399567   2.147394
    11  C    4.283253   3.798655   2.524713   1.488271   2.487904
    12  O    5.020377   4.792977   3.634906   2.369269   2.813604
    13  C    3.772603   2.489127   1.489528   2.526028   3.800589
    14  C    5.158692   4.306101   2.908671   2.547507   3.826022
    15  C    4.965016   3.824320   2.546694   2.910678   4.308378
    16  C    6.520840   5.702558   4.305067   3.819876   4.970681
    17  C    6.220533   4.978225   3.825790   4.308142   5.705868
    18  C    7.498086   6.508450   5.142995   4.949822   6.204501
    19  H    6.928310   6.289026   4.910935   4.138637   5.069817
    20  C    7.387063   6.222255   4.968745   5.164246   6.530009
    21  H    6.423081   5.085005   4.150924   4.919715   6.298817
    22  H    8.344247   7.124821   5.932593   6.220349   7.595469
    23  Br   9.325985   8.394032   7.014223   6.674628   7.826018
    24  O    4.202192   2.812486   2.369162   3.635555   4.793700
    25  H    5.152250   3.764900   3.180305   4.314269   5.569145
                    6          7          8          9         10
     6  C    0.000000
     7  H    2.155227   0.000000
     8  H    3.403091   2.487671   0.000000
     9  H    2.157341   4.300382   4.956299   0.000000
    10  H    1.084303   2.483222   4.300831   2.487317   0.000000
    11  C    3.771083   5.367561   4.662780   2.665486   4.634438
    12  O    4.203091   6.083472   5.738465   2.487055   4.858973
    13  C    4.285290   4.635730   2.665878   4.664771   5.369563
    14  C    4.965698   6.215086   4.912125   4.146675   5.929046
    15  C    5.159798   5.927842   4.143467   4.915504   6.216415
    16  C    6.213771   7.587183   6.291461   5.070285   7.114352
    17  C    6.526007   7.121780   5.078959   6.293388   7.592072
    18  C    7.368007   8.528663   6.917480   6.402272   8.324654
    19  H    6.408435   8.011580   6.997092   4.935612   7.201454
    20  C    7.518970   8.342988   6.417482   6.939524   8.549798
    21  H    6.940885   7.217109   4.952243   7.005081   8.024041
    22  H    8.549659   9.265104   7.213443   8.021360   9.592124
    23  Br   9.075345  10.375101   8.830234   7.849148   9.972149
    24  O    5.020449   4.857452   2.484648   5.739572   6.083377
    25  H    5.914324   5.817044   3.423497   6.452629   6.987642
                   11         12         13         14         15
    11  C    0.000000
    12  O    1.221481   0.000000
    13  C    2.954814   4.176279   0.000000
    14  C    1.493724   2.367117   2.523337   0.000000
    15  C    2.527315   3.632058   1.489927   1.405073   0.000000
    16  C    2.485299   2.796595   3.801040   1.396612   2.427765
    17  C    3.800525   4.786557   2.491937   2.420361   1.397504
    18  C    3.760689   4.183068   4.269758   2.402316   2.779994
    19  H    2.662430   2.467806   4.664047   2.142736   3.402216
    20  C    4.291932   5.018501   3.776297   2.798443   2.422051
    21  H    4.667536   5.735756   2.674214   3.397226   2.143024
    22  H    5.374607   6.078861   4.641464   3.881177   3.404012
    23  Br   5.338113   5.430046   6.184206   4.169546   4.694491
    24  O    4.177102   5.398561   1.222291   3.629901   2.365171
    25  H    4.585861   5.786964   1.788256   3.735400   2.340983
                   16         17         18         19         20
    16  C    0.000000
    17  C    2.792982   0.000000
    18  C    1.387733   2.399407   0.000000
    19  H    1.082050   3.874949   2.161446   0.000000
    20  C    2.427849   1.388893   1.395865   3.414860   0.000000
    21  H    3.875993   1.083062   3.386757   4.957909   2.149218
    22  H    3.407332   2.150293   2.158496   4.310040   1.082743
    23  Br   2.862196   4.165695   1.914500   2.987643   2.868150
    24  O    4.791683   2.809697   5.000566   5.736770   4.197993
    25  H    4.689584   2.267047   4.628734   5.715175   3.622423
                   21         22         23         24         25
    21  H    0.000000
    22  H    2.483109   0.000000
    23  Br   5.017336   2.975717   0.000000
    24  O    2.487693   4.856302   6.881211   0.000000
    25  H    1.662315   4.127761   6.432436   0.960000   0.000000
 Stoichiometry    C14H8BrO2(2)
 Framework group  C1[X(C14H8BrO2)]
 Deg. of freedom    69
 Full point group                 C1      NOp   1
 Largest Abelian subgroup         C1      NOp   1
 Largest concise Abelian subgroup C1      NOp   1
                         Standard orientation:                         
 ---------------------------------------------------------------------
 Center     Atomic      Atomic             Coordinates (Angstroms)
 Number     Number       Type             X           Y           Z
 ---------------------------------------------------------------------
      1          6           0        5.085086    0.015700   -0.000002
      2          6           0        4.052758    0.947300   -0.000125
      3          6           0        2.720829    0.524210   -0.000097
      4          6           0        2.428372   -0.853185    0.000071
      5          6           0        3.472950   -1.781957    0.000186
      6          6           0        4.794794   -1.350914    0.000150
      7          1           0        6.116000    0.351855   -0.000030
      8          1           0        4.261671    2.010159   -0.000258
      9          1           0        3.231856   -2.837973    0.000318
     10          1           0        5.599956   -2.077155    0.000246
     11          6           0        1.023716   -1.345011    0.000179
     12          8           0        0.762918   -2.538326   -0.000499
     13          6           0        1.636592    1.545545   -0.000297
     14          6           0       -0.062681   -0.319851    0.000011
     15          6           0        0.229938    1.054414   -0.000156
     16          6           0       -1.390208   -0.753671    0.000072
     17          6           0       -0.817197    1.979900   -0.000240
     18          6           0       -2.411057    0.186365   -0.000021
     19          1           0       -1.596755   -1.815824    0.000205
     20          6           0       -2.139692    1.555598   -0.000172
     21          1           0       -0.582880    3.037311   -0.000373
     22          1           0       -2.946824    2.277312   -0.000243
     23         35           0       -4.231319   -0.406895    0.000073
     24          8           0        1.887207    2.741867    0.000435
     25          1           0        1.066952    3.240646    0.000738
 ---------------------------------------------------------------------
 Rotational constants (GHZ):      0.9870154      0.1761103      0.1494452
 Standard basis: 6-311G(d) (5D, 7F)
 There are   375 symmetry adapted cartesian basis functions of A   symmetry.
 There are   356 symmetry adapted basis functions of A   symmetry.
   356 basis functions,   642 primitive gaussians,   375 cartesian basis functions
    72 alpha electrons       71 beta electrons
       nuclear repulsion energy      1392.9234315663 Hartrees.
 NAtoms=   25 NActive=   25 NUniq=   25 SFac= 1.00D+00 NAtFMM=   60 NAOKFM=F Big=F
 Integral buffers will be    262144 words long.
 Raffenetti 2 integral format.
 Two-electron integral symmetry is turned on.
 Nuclear repulsion after empirical dispersion term =     1392.8600951505 Hartrees.
 ------------------------------------------------------------------------------
 Polarizable Continuum Model (PCM)
 =================================
 Model                : PCM (using non-symmetric T matrix).
 Atomic radii         : UFF (Universal Force Field).
 Polarization charges : Total charges.
 Charge compensation  : None.
 Solution method      : On-the-fly selection.
 Cavity type          : Scaled VdW (van der Waals Surface) (Alpha=1.100).
 Cavity algorithm     : GePol (No added spheres)
                        Default sphere list used, NSphG=   25.
                        Lebedev-Laikov grids with approx.  5.0 points / Ang**2.
                        Smoothing algorithm: Karplus/York (Gamma=1.0000).
                        Polarization charges: spherical gaussians, with
                                              point-specific exponents (IZeta= 3).
                        Self-potential: point-specific (ISelfS= 7).
                        Self-field    : sphere-specific E.n sum rule (ISelfD= 2).
 1st derivatives      : Analytical E(r).r(x)/FMM algorithm (CHGder, D1EAlg=3).
                        Cavity 1st derivative terms included.
 Solvent              : Acetonitrile, Eps=  35.688000 Eps(inf)=   1.806874
 ------------------------------------------------------------------------------
 One-electron integrals computed using PRISM.
 NBasis=   356 RedAO= T EigKep=  9.45D-05  NBF=   356
 NBsUse=   356 1.00D-06 EigRej= -1.00D+00 NBFU=   356
 ExpMin= 1.03D-01 ExpMax= 4.40D+05 ExpMxC= 1.51D+04 IAcc=2 IRadAn=         4 AccDes= 0.00D+00
 Harris functional with IExCor=  402 and IRadAn=       4 diagonalized for initial guess.
 HarFok:  IExCor=  402 AccDes= 0.00D+00 IRadAn=         4 IDoV= 1 UseB2=F ITyADJ=14
 ICtDFT=  3500011 ScaDFX=  1.000000  1.000000  1.000000  1.000000
 FoFCou: FMM=F IPFlag=           0 FMFlag=      100000 FMFlg1=           0
         NFxFlg=           0 DoJE=T BraDBF=F KetDBF=T FulRan=T
         wScrn=  0.000000 ICntrl=     500 IOpCl=  0 I1Cent=   200000004 NGrid=           0
         NMat0=    1 NMatS0=      1 NMatT0=    0 NMatD0=    1 NMtDS0=    0 NMtDT0=    0
 Petite list used in FoFCou.
 Initial guess <Sx>= 0.0000 <Sy>= 0.0000 <Sz>= 0.5000 <S**2>= 0.7500 S= 0.5000
 Requested convergence on RMS density matrix=1.00D-08 within 128 cycles.
 Requested convergence on MAX density matrix=1.00D-06.
 Requested convergence on             energy=1.00D-06.
 No special actions if energy rises.
 Inv3:  Mode=1 IEnd=    14520000.
 Iteration    1 A*A^-1 deviation from unit magnitude is 2.78D-15 for    761.
 Iteration    1 A*A^-1 deviation from orthogonality  is 3.38D-15 for   1482   1291.
 Iteration    1 A^-1*A deviation from unit magnitude is 2.78D-15 for    500.
 Iteration    1 A^-1*A deviation from orthogonality  is 3.30D-13 for   2076   1482.
 DSYEVD-2 returned Info=       64170 IAlg= 4 N=   356 NDim=   356 NE2=      551065 trying  DSYEV.
 DSYEVD-2 returned Info=       64170 IAlg= 4 N=   356 NDim=   356 NE2=      551065 trying  DSYEV.
 Error on total polarization charges =  0.01444
 SCF Done:  E(UB3LYP) =  -3263.10045529     A.U. after   18 cycles
            NFock= 18  Conv=0.75D-08     -V/T= 2.0017
 <Sx>= 0.0000 <Sy>= 0.0000 <Sz>= 0.5000 <S**2>= 0.7667 S= 0.5083
 <L.S>= 0.000000000000E+00
 Annihilation of the first spin contaminant:
 S**2 before annihilation     0.7667,   after     0.7502
 DoSCS=F DFT=T ScalE2(SS,OS)=  1.000000  1.000000
 ExpMin= 1.03D-01 ExpMax= 4.40D+05 ExpMxC= 1.51D+04 IAcc=3 IRadAn=         5 AccDes= 0.00D+00
 HarFok:  IExCor=  205 AccDes= 0.00D+00 IRadAn=         5 IDoV=-2 UseB2=F ITyADJ=14
 ICtDFT= 12500011 ScaDFX=  1.000000  1.000000  1.000000  1.000000
 Range of M.O.s used for correlation:    31   356
 NBasis=   356 NAE=    72 NBE=    71 NFC=    30 NFV=     0
 NROrb=    326 NOA=    42 NOB=    41 NVA=   284 NVB=   285

 **** Warning!!: The largest alpha MO coefficient is  0.26139147D+02


 **** Warning!!: The smallest alpha delta epsilon is  0.96702724D-01


 **** Warning!!: The largest beta MO coefficient is  0.25995898D+02

 Ignoring spin specification with unrestricted ground state.
 NEqPCM:  Using equilibrium solvation (IEInf=0, Eps=  35.6880, EpsInf=   1.8069)
 Orbital symmetries:
 Alpha Orbitals:
       Occupied  (A) (A) (A) (A) (A) (A) (A) (A) (A) (A) (A) (A)
                 (A) (A) (A) (A) (A) (A) (A) (A) (A) (A) (A) (A)
                 (A) (A) (A) (A) (A) (A) (A) (A) (A) (A) (A) (A)
                 (A) (A) (A) (A) (A) (A) (A) (A) (A) (A) (A) (A)
                 (A) (A) (A) (A) (A) (A) (A) (A) (A) (A) (A) (A)
                 (A) (A) (A) (A) (A) (A) (A) (A) (A) (A) (A) (A)
       Virtual   (A) (A) (A) (A) (A) (A) (A) (A) (A) (A) (A) (A)
                 (A) (A) (A) (A) (A) (A) (A) (A) (A) (A) (A) (A)
                 (A) (A) (A) (A) (A) (A) (A) (A) (A) (A) (A) (A)
                 (A) (A) (A) (A) (A) (A) (A) (A) (A) (A) (A) (A)
                 (A) (A) (A) (A) (A) (A) (A) (A) (A) (A) (A) (A)
                 (A) (A) (A) (A) (A) (A) (A) (A) (A) (A) (A) (A)
                 (A) (A) (A) (A) (A) (A) (A) (A) (A) (A) (A) (A)
                 (A) (A) (A) (A) (A) (A) (A) (A) (A) (A) (A) (A)
                 (A) (A) (A) (A) (A) (A) (A) (A) (A) (A) (A) (A)
                 (A) (A) (A) (A) (A) (A) (A) (A) (A) (A) (A) (A)
                 (A) (A) (A) (A) (A) (A) (A) (A) (A) (A) (A) (A)
                 (A) (A) (A) (A) (A) (A) (A) (A) (A) (A) (A) (A)
                 (A) (A) (A) (A) (A) (A) (A) (A) (A) (A) (A) (A)
                 (A) (A) (A) (A) (A) (A) (A) (A) (A) (A) (A) (A)
                 (A) (A) (A) (A) (A) (A) (A) (A) (A) (A) (A) (A)
                 (A) (A) (A) (A) (A) (A) (A) (A) (A) (A) (A) (A)
                 (A) (A) (A) (A) (A) (A) (A) (A) (A) (A) (A) (A)
                 (A) (A) (A) (A) (A) (A) (A) (A) (A) (A) (A) (A)
                 (A) (A) (A) (A) (A) (A) (A) (A) (A) (A) (A) (A)
                 (A) (A) (A) (A) (A) (A) (A) (A) (A) (A) (A) (A)
                 (A) (A) (A) (A) (A) (A) (A) (A) (A) (A) (A) (A)
                 (A) (A) (A) (A) (A) (A) (A) (A) (A) (A) (A) (A)
                 (A) (A) (A) (A) (A) (A) (A) (A) (A) (A) (A) (A)
                 (A) (A) (A) (A) (A) (A) (A) (A)
 Beta  Orbitals:
       Occupied  (A) (A) (A) (A) (A) (A) (A) (A) (A) (A) (A) (A)
                 (A) (A) (A) (A) (A) (A) (A) (A) (A) (A) (A) (A)
                 (A) (A) (A) (A) (A) (A) (A) (A) (A) (A) (A) (A)
                 (A) (A) (A) (A) (A) (A) (A) (A) (A) (A) (A) (A)
                 (A) (A) (A) (A) (A) (A) (A) (A) (A) (A) (A) (A)
                 (A) (A) (A) (A) (A) (A) (A) (A) (A) (A) (A)
       Virtual   (A) (A) (A) (A) (A) (A) (A) (A) (A) (A) (A) (A)
                 (A) (A) (A) (A) (A) (A) (A) (A) (A) (A) (A) (A)
                 (A) (A) (A) (A) (A) (A) (A) (A) (A) (A) (A) (A)
                 (A) (A) (A) (A) (A) (A) (A) (A) (A) (A) (A) (A)
                 (A) (A) (A) (A) (A) (A) (A) (A) (A) (A) (A) (A)
                 (A) (A) (A) (A) (A) (A) (A) (A) (A) (A) (A) (A)
                 (A) (A) (A) (A) (A) (A) (A) (A) (A) (A) (A) (A)
                 (A) (A) (A) (A) (A) (A) (A) (A) (A) (A) (A) (A)
                 (A) (A) (A) (A) (A) (A) (A) (A) (A) (A) (A) (A)
                 (A) (A) (A) (A) (A) (A) (A) (A) (A) (A) (A) (A)
                 (A) (A) (A) (A) (A) (A) (A) (A) (A) (A) (A) (A)
                 (A) (A) (A) (A) (A) (A) (A) (A) (A) (A) (A) (A)
                 (A) (A) (A) (A) (A) (A) (A) (A) (A) (A) (A) (A)
                 (A) (A) (A) (A) (A) (A) (A) (A) (A) (A) (A) (A)
                 (A) (A) (A) (A) (A) (A) (A) (A) (A) (A) (A) (A)
                 (A) (A) (A) (A) (A) (A) (A) (A) (A) (A) (A) (A)
                 (A) (A) (A) (A) (A) (A) (A) (A) (A) (A) (A) (A)
                 (A) (A) (A) (A) (A) (A) (A) (A) (A) (A) (A) (A)
                 (A) (A) (A) (A) (A) (A) (A) (A) (A) (A) (A) (A)
                 (A) (A) (A) (A) (A) (A) (A) (A) (A) (A) (A) (A)
                 (A) (A) (A) (A) (A) (A) (A) (A) (A) (A) (A) (A)
                 (A) (A) (A) (A) (A) (A) (A) (A) (A) (A) (A) (A)
                 (A) (A) (A) (A) (A) (A) (A) (A) (A) (A) (A) (A)
                 (A) (A) (A) (A) (A) (A) (A) (A) (A)
    20 initial guesses have been made.
 Convergence on wavefunction:    0.000001000000000
 Iteration     1 Dimension    20 NMult     0 NNew     20
 CISAX will form    20 AO SS matrices at one time.
 New state      2 was old state      4
 New state      3 was old state      2
 New state      4 was old state      3
 Iteration     2 Dimension    30 NMult    20 NNew     10
 Iteration     3 Dimension    40 NMult    30 NNew     10
 Iteration     4 Dimension    50 NMult    40 NNew     10
 Iteration     5 Dimension    60 NMult    50 NNew     10
 Iteration     6 Dimension    70 NMult    60 NNew     10
 Iteration     7 Dimension    80 NMult    70 NNew     10
 Iteration     8 Dimension    90 NMult    80 NNew     10
 Iteration     9 Dimension   100 NMult    90 NNew     10
 Iteration    10 Dimension   110 NMult   100 NNew     10
 Iteration    11 Dimension   118 NMult   110 NNew      8
 Iteration    12 Dimension   126 NMult   118 NNew      8
 Iteration    13 Dimension   130 NMult   126 NNew      4
 Iteration    14 Dimension   132 NMult   130 NNew      2
 ***********************************************************************
 Excited states from <AA,BB:AA,BB> singles matrix:
 ***********************************************************************
 
 ExtSpn:  IState=     1 X2= 1.008 Y2= 0.008 X2-Y2-1=-6.66D-16
          S2Grnd=  0.767 Ra=  0.006 Rb=  0.006 T=  0.002 S2Ext=  0.014 S2=  0.781
 ExtSpn:  IState=     2 X2= 1.002 Y2= 0.002 X2-Y2-1=-1.78D-15
          S2Grnd=  0.767 Ra=  0.017 Rb=  0.183 T=  0.111 S2Ext=  0.311 S2=  1.078
 ExtSpn:  IState=     3 X2= 1.007 Y2= 0.007 X2-Y2-1= 0.00D+00
          S2Grnd=  0.767 Ra=  0.026 Rb=  0.014 T=  0.024 S2Ext=  0.064 S2=  0.831
 ExtSpn:  IState=     4 X2= 1.006 Y2= 0.006 X2-Y2-1= 6.66D-16
          S2Grnd=  0.767 Ra=  0.043 Rb=  0.041 T=  0.078 S2Ext=  0.162 S2=  0.929
 ExtSpn:  IState=     5 X2= 1.008 Y2= 0.008 X2-Y2-1=-7.77D-16
          S2Grnd=  0.767 Ra=  0.034 Rb=  0.078 T=  0.083 S2Ext=  0.195 S2=  0.961
 Ground to excited state transition densities written to RWF  633
 Ground to excited state transition electric dipole moments (Au):
       state          X           Y           Z        Dip. S.      Osc.
         1         0.1144      0.8628     -0.0001      0.7576      0.0320
         2        -0.0016      0.0002      0.0003      0.0000      0.0000
         3         1.7854     -0.3067      0.0000      3.2817      0.2219
         4        -0.0756      0.0642      0.0000      0.0098      0.0007
         5        -1.3046      0.2904      0.0000      1.7863      0.1387
 Ground to excited state transition velocity dipole moments (Au):
       state          X           Y           Z        Dip. S.      Osc.
         1        -0.0102     -0.0666      0.0000      0.0045      0.0478
         2         0.0002      0.0000     -0.0001      0.0000      0.0000
         3        -0.1829      0.0309      0.0000      0.0344      0.2263
         4         0.0077     -0.0081      0.0000      0.0001      0.0007
         5         0.1504     -0.0332      0.0000      0.0237      0.1357
 Ground to excited state transition magnetic dipole moments (Au):
       state          X           Y           Z
         1         0.0000      0.0000     -0.1057
         2        -0.0724     -0.3526     -0.0002
         3        -0.0001     -0.0003      0.3353
         4         0.0000     -0.0001     -0.6610
         5         0.0000     -0.0004     -1.1900
 Ground to excited state transition velocity quadrupole moments (Au):
       state          XX          YY          ZZ          XY          XZ          YZ
         1        -0.1519     -0.0198      0.0001     -0.1531      0.0000      0.0000
         2         0.0007      0.0000      0.0000      0.0000      0.0118     -0.0004
         3        -0.7060     -0.0115      0.0048      0.0534      0.0000      0.0000
         4         0.0123      0.0511      0.0014     -0.1593      0.0000      0.0000
         5         0.0596      0.1563     -0.0109     -0.2976      0.0000      0.0000
 <0|del|b> * <b|rxdel|0> + <0|del|b> * <b|delr+rdel|0>
 Rotatory Strengths (R) in cgs (10**-40 erg-esu-cm/Gauss)
       state          XX          YY          ZZ    R(velocity)    E-M Angle
         1         0.0013      0.0024     -0.0033      0.0001       90.00
         2         0.0320     -0.0409     -0.0107     -0.0065       90.00
         3        -0.0326      0.0442      0.0186      0.0101       90.00
         4        -0.0164     -0.0106      0.0020     -0.0083       90.00
         5         0.0466     -0.0199      0.0116      0.0128       90.00
 1/2[<0|r|b>*<b|rxdel|0> + (<0|rxdel|b>*<b|r|0>)*]
 Rotatory Strengths (R) in cgs (10**-40 erg-esu-cm/Gauss)
       state          XX          YY          ZZ     R(length)
         1        -0.0008      0.0121     -0.0073      0.0013
         2        -0.0808      0.0616      0.0000     -0.0064
         3         0.0918     -0.0552     -0.0069      0.0099
         4         0.0020      0.0040     -0.0149     -0.0029
         5        -0.0442      0.0722      0.0065      0.0115
  1/2[<0|del|b>*<b|r|0> + (<0|r|b>*<b|del|0>)*] (Au)
       state          X           Y           Z        Dip. S.   Osc.(frdel)
         1        -0.0012     -0.0575      0.0000      0.0587      0.0391
         2         0.0000      0.0000      0.0000      0.0000      0.0000
         3        -0.3266     -0.0095      0.0000      0.3361      0.2241
         4        -0.0006     -0.0005      0.0000      0.0011      0.0007
         5        -0.1962     -0.0096      0.0000      0.2058      0.1372

 Excitation energies and oscillator strengths:
 
 Excited State   1:  2.031-A      1.7266 eV  718.09 nm  f=0.0320  <S**2>=0.781
     72A -> 73A        0.98775
 This state for optimization and/or second-order correction.
 Total Energy, E(TD-HF/TD-KS) =  -3263.03700486    
 Copying the excited state density for this state as the 1-particle RhoCI density.
 
 Excited State   2:  2.305-A      2.6639 eV  465.43 nm  f=0.0000  <S**2>=1.078
     70A -> 73A       -0.12339
     71B -> 72B        0.94423
     71B -> 73B        0.26400
     71B -> 79B       -0.12469
 
 Excited State   3:  2.079-A      2.7595 eV  449.30 nm  f=0.2219  <S**2>=0.831
     72A -> 74A        0.93610
     70B -> 72B        0.28134
 
 Excited State   4:  2.171-A      3.0502 eV  406.48 nm  f=0.0007  <S**2>=0.929
     72A -> 74A       -0.10955
     72A -> 75A        0.93112
     68B -> 73B        0.12372
     69B -> 72B        0.19165
 
 Excited State   5:  2.201-A      3.1704 eV  391.07 nm  f=0.1387  <S**2>=0.961
     69A -> 73A       -0.10072
     72A -> 74A       -0.30271
     68B -> 72B        0.16516
     69B -> 72B       -0.15123
     70B -> 72B        0.87470
 SavETr:  write IOETrn=   770 NScale= 10 NData=  16 NLR=1 NState=    5 LETran=      96.
          IDoAtm=1111111111111111111111111
 NEqPCM:  Using equilibrium solvation (IEInf=0, Eps=  35.6880, EpsInf=   1.8069)
          Differentiating once with respect to electric field.
                with respect to dipole field.
          Differentiating once with respect to nuclear coordinates.
          There are     1 degrees of freedom in the 1st order CPHF.  IDoFFX=0 NUNeed=     1.
 LinEq1:  Iter=  0 NonCon=     1 RMS=2.75D-03 Max=1.96D-01 NDo=     1
 AX will form     1 AO Fock derivatives at one time.
 LinEq1:  Iter=  1 NonCon=     1 RMS=1.72D-03 Max=1.32D-01 NDo=     1
 LinEq1:  Iter=  2 NonCon=     1 RMS=9.96D-04 Max=6.52D-02 NDo=     1
 LinEq1:  Iter=  3 NonCon=     1 RMS=7.22D-04 Max=3.43D-02 NDo=     1
 LinEq1:  Iter=  4 NonCon=     1 RMS=5.76D-04 Max=2.50D-02 NDo=     1
 LinEq1:  Iter=  5 NonCon=     1 RMS=3.85D-04 Max=1.57D-02 NDo=     1
 LinEq1:  Iter=  6 NonCon=     1 RMS=2.75D-04 Max=1.41D-02 NDo=     1
 LinEq1:  Iter=  7 NonCon=     1 RMS=1.75D-04 Max=9.66D-03 NDo=     1
 LinEq1:  Iter=  8 NonCon=     1 RMS=1.32D-04 Max=9.75D-03 NDo=     1
 LinEq1:  Iter=  9 NonCon=     1 RMS=7.03D-05 Max=3.21D-03 NDo=     1
 LinEq1:  Iter= 10 NonCon=     1 RMS=4.73D-05 Max=2.89D-03 NDo=     1
 LinEq1:  Iter= 11 NonCon=     1 RMS=2.51D-05 Max=9.72D-04 NDo=     1
 LinEq1:  Iter= 12 NonCon=     1 RMS=1.36D-05 Max=4.62D-04 NDo=     1
 LinEq1:  Iter= 13 NonCon=     1 RMS=8.72D-06 Max=4.99D-04 NDo=     1
 LinEq1:  Iter= 14 NonCon=     1 RMS=5.85D-06 Max=3.24D-04 NDo=     1
 LinEq1:  Iter= 15 NonCon=     1 RMS=3.62D-06 Max=2.09D-04 NDo=     1
 LinEq1:  Iter= 16 NonCon=     1 RMS=1.99D-06 Max=1.42D-04 NDo=     1
 LinEq1:  Iter= 17 NonCon=     1 RMS=1.40D-06 Max=5.03D-05 NDo=     1
 LinEq1:  Iter= 18 NonCon=     1 RMS=6.87D-07 Max=2.63D-05 NDo=     1
 LinEq1:  Iter= 19 NonCon=     1 RMS=4.43D-07 Max=1.51D-05 NDo=     1
 LinEq1:  Iter= 20 NonCon=     1 RMS=2.25D-07 Max=8.49D-06 NDo=     1
 LinEq1:  Iter= 21 NonCon=     1 RMS=1.21D-07 Max=4.66D-06 NDo=     1
 LinEq1:  Iter= 22 NonCon=     1 RMS=6.28D-08 Max=2.85D-06 NDo=     1
 LinEq1:  Iter= 23 NonCon=     1 RMS=4.11D-08 Max=2.36D-06 NDo=     1
 LinEq1:  Iter= 24 NonCon=     1 RMS=3.21D-08 Max=1.74D-06 NDo=     1
 LinEq1:  Iter= 25 NonCon=     1 RMS=1.57D-08 Max=5.49D-07 NDo=     1
 LinEq1:  Iter= 26 NonCon=     1 RMS=1.15D-08 Max=4.80D-07 NDo=     1
 LinEq1:  Iter= 27 NonCon=     1 RMS=5.12D-09 Max=2.06D-07 NDo=     1
 LinEq1:  Iter= 28 NonCon=     1 RMS=1.93D-09 Max=7.83D-08 NDo=     1
 LinEq1:  Iter= 29 NonCon=     1 RMS=1.35D-09 Max=7.43D-08 NDo=     1
 LinEq1:  Iter= 30 NonCon=     1 RMS=6.15D-10 Max=1.62D-08 NDo=     1
 LinEq1:  Iter= 31 NonCon=     1 RMS=2.14D-10 Max=8.60D-09 NDo=     1
 LinEq1:  Iter= 32 NonCon=     1 RMS=1.08D-10 Max=3.56D-09 NDo=     1
 LinEq1:  Iter= 33 NonCon=     1 RMS=6.20D-11 Max=2.69D-09 NDo=     1
 LinEq1:  Iter= 34 NonCon=     0 RMS=1.98D-11 Max=6.57D-10 NDo=     1
 Linear equations converged to 1.000D-10 1.000D-09 after    34 iterations.
 End of Minotr F.D. properties file   721 does not exist.
 End of Minotr F.D. properties file   722 does not exist.
 End of Minotr F.D. properties file   788 does not exist.

 **********************************************************************

            Population analysis using the SCF density.

 **********************************************************************

 Orbital symmetries:
 Alpha Orbitals:
       Occupied  (A) (A) (A) (A) (A) (A) (A) (A) (A) (A) (A) (A)
                 (A) (A) (A) (A) (A) (A) (A) (A) (A) (A) (A) (A)
                 (A) (A) (A) (A) (A) (A) (A) (A) (A) (A) (A) (A)
                 (A) (A) (A) (A) (A) (A) (A) (A) (A) (A) (A) (A)
                 (A) (A) (A) (A) (A) (A) (A) (A) (A) (A) (A) (A)
                 (A) (A) (A) (A) (A) (A) (A) (A) (A) (A) (A) (A)
       Virtual   (A) (A) (A) (A) (A) (A) (A) (A) (A) (A) (A) (A)
                 (A) (A) (A) (A) (A) (A) (A) (A) (A) (A) (A) (A)
                 (A) (A) (A) (A) (A) (A) (A) (A) (A) (A) (A) (A)
                 (A) (A) (A) (A) (A) (A) (A) (A) (A) (A) (A) (A)
                 (A) (A) (A) (A) (A) (A) (A) (A) (A) (A) (A) (A)
                 (A) (A) (A) (A) (A) (A) (A) (A) (A) (A) (A) (A)
                 (A) (A) (A) (A) (A) (A) (A) (A) (A) (A) (A) (A)
                 (A) (A) (A) (A) (A) (A) (A) (A) (A) (A) (A) (A)
                 (A) (A) (A) (A) (A) (A) (A) (A) (A) (A) (A) (A)
                 (A) (A) (A) (A) (A) (A) (A) (A) (A) (A) (A) (A)
                 (A) (A) (A) (A) (A) (A) (A) (A) (A) (A) (A) (A)
                 (A) (A) (A) (A) (A) (A) (A) (A) (A) (A) (A) (A)
                 (A) (A) (A) (A) (A) (A) (A) (A) (A) (A) (A) (A)
                 (A) (A) (A) (A) (A) (A) (A) (A) (A) (A) (A) (A)
                 (A) (A) (A) (A) (A) (A) (A) (A) (A) (A) (A) (A)
                 (A) (A) (A) (A) (A) (A) (A) (A) (A) (A) (A) (A)
                 (A) (A) (A) (A) (A) (A) (A) (A) (A) (A) (A) (A)
                 (A) (A) (A) (A) (A) (A) (A) (A) (A) (A) (A) (A)
                 (A) (A) (A) (A) (A) (A) (A) (A) (A) (A) (A) (A)
                 (A) (A) (A) (A) (A) (A) (A) (A) (A) (A) (A) (A)
                 (A) (A) (A) (A) (A) (A) (A) (A) (A) (A) (A) (A)
                 (A) (A) (A) (A) (A) (A) (A) (A) (A) (A) (A) (A)
                 (A) (A) (A) (A) (A) (A) (A) (A) (A) (A) (A) (A)
                 (A) (A) (A) (A) (A) (A) (A) (A)
 Beta  Orbitals:
       Occupied  (A) (A) (A) (A) (A) (A) (A) (A) (A) (A) (A) (A)
                 (A) (A) (A) (A) (A) (A) (A) (A) (A) (A) (A) (A)
                 (A) (A) (A) (A) (A) (A) (A) (A) (A) (A) (A) (A)
                 (A) (A) (A) (A) (A) (A) (A) (A) (A) (A) (A) (A)
                 (A) (A) (A) (A) (A) (A) (A) (A) (A) (A) (A) (A)
                 (A) (A) (A) (A) (A) (A) (A) (A) (A) (A) (A)
       Virtual   (A) (A) (A) (A) (A) (A) (A) (A) (A) (A) (A) (A)
                 (A) (A) (A) (A) (A) (A) (A) (A) (A) (A) (A) (A)
                 (A) (A) (A) (A) (A) (A) (A) (A) (A) (A) (A) (A)
                 (A) (A) (A) (A) (A) (A) (A) (A) (A) (A) (A) (A)
                 (A) (A) (A) (A) (A) (A) (A) (A) (A) (A) (A) (A)
                 (A) (A) (A) (A) (A) (A) (A) (A) (A) (A) (A) (A)
                 (A) (A) (A) (A) (A) (A) (A) (A) (A) (A) (A) (A)
                 (A) (A) (A) (A) (A) (A) (A) (A) (A) (A) (A) (A)
                 (A) (A) (A) (A) (A) (A) (A) (A) (A) (A) (A) (A)
                 (A) (A) (A) (A) (A) (A) (A) (A) (A) (A) (A) (A)
                 (A) (A) (A) (A) (A) (A) (A) (A) (A) (A) (A) (A)
                 (A) (A) (A) (A) (A) (A) (A) (A) (A) (A) (A) (A)
                 (A) (A) (A) (A) (A) (A) (A) (A) (A) (A) (A) (A)
                 (A) (A) (A) (A) (A) (A) (A) (A) (A) (A) (A) (A)
                 (A) (A) (A) (A) (A) (A) (A) (A) (A) (A) (A) (A)
                 (A) (A) (A) (A) (A) (A) (A) (A) (A) (A) (A) (A)
                 (A) (A) (A) (A) (A) (A) (A) (A) (A) (A) (A) (A)
                 (A) (A) (A) (A) (A) (A) (A) (A) (A) (A) (A) (A)
                 (A) (A) (A) (A) (A) (A) (A) (A) (A) (A) (A) (A)
                 (A) (A) (A) (A) (A) (A) (A) (A) (A) (A) (A) (A)
                 (A) (A) (A) (A) (A) (A) (A) (A) (A) (A) (A) (A)
                 (A) (A) (A) (A) (A) (A) (A) (A) (A) (A) (A) (A)
                 (A) (A) (A) (A) (A) (A) (A) (A) (A) (A) (A) (A)
                 (A) (A) (A) (A) (A) (A) (A) (A) (A)
 The electronic state is 2-A.
 Alpha  occ. eigenvalues -- -482.83938 -62.49236 -56.31265 -56.30890 -56.30870
 Alpha  occ. eigenvalues --  -19.20405 -19.10267 -10.27602 -10.25800 -10.24539
 Alpha  occ. eigenvalues --  -10.20992 -10.20673 -10.20489 -10.20410 -10.20183
 Alpha  occ. eigenvalues --  -10.20020 -10.19398 -10.18815 -10.18760 -10.18658
 Alpha  occ. eigenvalues --  -10.18554  -8.70207  -6.53337  -6.52077  -6.52031
 Alpha  occ. eigenvalues --   -2.64435  -2.64077  -2.64046  -2.63042  -2.63041
 Alpha  occ. eigenvalues --   -1.17273  -1.04579  -0.90119  -0.88085  -0.83417
 Alpha  occ. eigenvalues --   -0.79939  -0.78326  -0.77269  -0.75237  -0.71366
 Alpha  occ. eigenvalues --   -0.67266  -0.64515  -0.62740  -0.61957  -0.58124
 Alpha  occ. eigenvalues --   -0.56241  -0.54061  -0.49726  -0.49260  -0.48712
 Alpha  occ. eigenvalues --   -0.48286  -0.47503  -0.47131  -0.45006  -0.44215
 Alpha  occ. eigenvalues --   -0.43525  -0.43308  -0.40364  -0.40138  -0.39468
 Alpha  occ. eigenvalues --   -0.38208  -0.37614  -0.36317  -0.35446  -0.33706
 Alpha  occ. eigenvalues --   -0.30385  -0.29355  -0.28408  -0.27447  -0.26484
 Alpha  occ. eigenvalues --   -0.26457  -0.17322
 Alpha virt. eigenvalues --   -0.07652  -0.03793  -0.02321  -0.01743   0.02448
 Alpha virt. eigenvalues --    0.02979   0.04331   0.05702   0.07991   0.08711
 Alpha virt. eigenvalues --    0.09760   0.11659   0.12880   0.12951   0.15870
 Alpha virt. eigenvalues --    0.18991   0.19212   0.21300   0.21761   0.22322
 Alpha virt. eigenvalues --    0.23636   0.24315   0.24844   0.26859   0.27489
 Alpha virt. eigenvalues --    0.28216   0.28254   0.28522   0.28800   0.30654
 Alpha virt. eigenvalues --    0.31231   0.34649   0.34730   0.35378   0.37003
 Alpha virt. eigenvalues --    0.37591   0.37684   0.37850   0.38901   0.39215
 Alpha virt. eigenvalues --    0.40113   0.40540   0.40876   0.41573   0.42648
 Alpha virt. eigenvalues --    0.43175   0.43432   0.43756   0.44883   0.45068
 Alpha virt. eigenvalues --    0.45552   0.45767   0.47786   0.48418   0.48517
 Alpha virt. eigenvalues --    0.51327   0.52434   0.53459   0.55860   0.56682
 Alpha virt. eigenvalues --    0.56985   0.57208   0.58704   0.58810   0.59763
 Alpha virt. eigenvalues --    0.60314   0.60733   0.61599   0.61789   0.62754
 Alpha virt. eigenvalues --    0.63279   0.64241   0.65964   0.66583   0.66895
 Alpha virt. eigenvalues --    0.70312   0.70542   0.71952   0.72006   0.72654
 Alpha virt. eigenvalues --    0.73936   0.75436   0.75906   0.78006   0.79418
 Alpha virt. eigenvalues --    0.80992   0.81396   0.82751   0.83563   0.83675
 Alpha virt. eigenvalues --    0.84819   0.86543   0.88040   0.89649   0.91669
 Alpha virt. eigenvalues --    0.91781   0.92510   0.96656   0.97352   0.97620
 Alpha virt. eigenvalues --    0.98399   0.98693   1.00204   1.00989   1.03291
 Alpha virt. eigenvalues --    1.04453   1.08331   1.09670   1.09915   1.10637
 Alpha virt. eigenvalues --    1.11230   1.12508   1.14789   1.15439   1.16925
 Alpha virt. eigenvalues --    1.18075   1.19478   1.19601   1.20504   1.23331
 Alpha virt. eigenvalues --    1.25047   1.25817   1.26667   1.28979   1.30442
 Alpha virt. eigenvalues --    1.31017   1.38174   1.42503   1.44180   1.45903
 Alpha virt. eigenvalues --    1.47300   1.47321   1.48118   1.49907   1.52426
 Alpha virt. eigenvalues --    1.54011   1.55375   1.57011   1.57300   1.59847
 Alpha virt. eigenvalues --    1.64527   1.65394   1.68835   1.69446   1.72186
 Alpha virt. eigenvalues --    1.74096   1.77765   1.78581   1.79920   1.80631
 Alpha virt. eigenvalues --    1.81969   1.82704   1.83621   1.84175   1.84565
 Alpha virt. eigenvalues --    1.86251   1.88731   1.89085   1.89620   1.90169
 Alpha virt. eigenvalues --    1.91618   1.92291   1.92320   1.94912   1.95841
 Alpha virt. eigenvalues --    1.97544   2.01386   2.03952   2.06007   2.11046
 Alpha virt. eigenvalues --    2.14232   2.15779   2.19326   2.20756   2.25391
 Alpha virt. eigenvalues --    2.26371   2.29093   2.31081   2.31922   2.32818
 Alpha virt. eigenvalues --    2.33920   2.34737   2.35595   2.37421   2.39695
 Alpha virt. eigenvalues --    2.46308   2.46813   2.51529   2.51759   2.54525
 Alpha virt. eigenvalues --    2.55308   2.56988   2.58527   2.65280   2.65932
 Alpha virt. eigenvalues --    2.67986   2.73062   2.73606   2.76019   2.77572
 Alpha virt. eigenvalues --    2.79560   2.81524   2.81952   2.83316   2.87962
 Alpha virt. eigenvalues --    2.89888   2.93309   2.96863   2.96903   3.02193
 Alpha virt. eigenvalues --    3.03877   3.04746   3.05608   3.12653   3.13356
 Alpha virt. eigenvalues --    3.15730   3.19958   3.21289   3.23336   3.25466
 Alpha virt. eigenvalues --    3.26340   3.27688   3.28640   3.30358   3.31013
 Alpha virt. eigenvalues --    3.32558   3.33719   3.36376   3.39519   3.43187
 Alpha virt. eigenvalues --    3.44749   3.46232   3.51563   3.53218   3.55132
 Alpha virt. eigenvalues --    3.57712   3.68264   3.69714   3.76168   3.80828
 Alpha virt. eigenvalues --    3.91765   3.94024   4.10838   4.12969   4.13075
 Alpha virt. eigenvalues --    4.16243   4.20454   4.36065   4.36474   4.53903
 Alpha virt. eigenvalues --    4.72363   4.77664   4.78943   4.79810   4.89514
 Alpha virt. eigenvalues --    5.09745   5.13455   5.61135   5.71234   6.47490
 Alpha virt. eigenvalues --    7.45468   7.52822   7.62539  23.19436  23.33420
 Alpha virt. eigenvalues --   23.78644  23.79842  23.80104  23.83646  23.84786
 Alpha virt. eigenvalues --   23.87859  24.00110  24.02002  24.02771  24.03544
 Alpha virt. eigenvalues --   24.11282  24.13025  47.76585  49.90760  49.99360
 Alpha virt. eigenvalues --  289.65398 289.72673 289.846101020.51456
  Beta  occ. eigenvalues -- -482.83936 -62.49234 -56.31266 -56.30882 -56.30869
  Beta  occ. eigenvalues --  -19.20006 -19.09839 -10.26996 -10.25783 -10.24367
  Beta  occ. eigenvalues --  -10.21059 -10.20575 -10.20520 -10.20495 -10.20105
  Beta  occ. eigenvalues --  -10.20006 -10.19258 -10.18836 -10.18710 -10.18662
  Beta  occ. eigenvalues --  -10.18420  -8.70204  -6.53339  -6.52062  -6.52029
  Beta  occ. eigenvalues --   -2.64435  -2.64070  -2.64047  -2.63034  -2.63034
  Beta  occ. eigenvalues --   -1.16484  -1.03866  -0.89906  -0.87907  -0.83158
  Beta  occ. eigenvalues --   -0.79643  -0.77996  -0.77090  -0.75122  -0.70679
  Beta  occ. eigenvalues --   -0.67126  -0.64141  -0.62493  -0.61855  -0.57867
  Beta  occ. eigenvalues --   -0.56025  -0.53795  -0.49596  -0.48520  -0.48176
  Beta  occ. eigenvalues --   -0.47276  -0.46984  -0.46794  -0.44923  -0.44136
  Beta  occ. eigenvalues --   -0.43263  -0.42071  -0.40149  -0.39606  -0.39353
  Beta  occ. eigenvalues --   -0.38138  -0.36712  -0.36235  -0.35223  -0.33031
  Beta  occ. eigenvalues --   -0.30371  -0.28303  -0.27781  -0.26664  -0.26094
  Beta  occ. eigenvalues --   -0.26071
  Beta virt. eigenvalues --   -0.10879  -0.06572  -0.02873  -0.01927  -0.01570
  Beta virt. eigenvalues --    0.03123   0.04385   0.05370   0.05733   0.08019
  Beta virt. eigenvalues --    0.08730   0.09792   0.11688   0.12991   0.13498
  Beta virt. eigenvalues --    0.15940   0.19592   0.20217   0.21499   0.21930
  Beta virt. eigenvalues --    0.22541   0.23756   0.24472   0.24935   0.26936
  Beta virt. eigenvalues --    0.27552   0.28275   0.28327   0.28607   0.28970
  Beta virt. eigenvalues --    0.30737   0.31537   0.34770   0.35388   0.35597
  Beta virt. eigenvalues --    0.37119   0.37769   0.38036   0.38062   0.39099
  Beta virt. eigenvalues --    0.39701   0.40289   0.40944   0.40969   0.41628
  Beta virt. eigenvalues --    0.42808   0.43342   0.43558   0.43920   0.45027
  Beta virt. eigenvalues --    0.45148   0.45713   0.45878   0.48086   0.48733
  Beta virt. eigenvalues --    0.48845   0.51388   0.52604   0.53845   0.55910
  Beta virt. eigenvalues --    0.56833   0.57079   0.57434   0.58831   0.59239
  Beta virt. eigenvalues --    0.59904   0.60426   0.60850   0.61712   0.62010
  Beta virt. eigenvalues --    0.62803   0.63411   0.64370   0.66287   0.66667
  Beta virt. eigenvalues --    0.67108   0.70468   0.70844   0.72104   0.72313
  Beta virt. eigenvalues --    0.72738   0.74062   0.75569   0.76026   0.78073
  Beta virt. eigenvalues --    0.79559   0.81102   0.81503   0.82956   0.83685
  Beta virt. eigenvalues --    0.84743   0.84934   0.86691   0.88133   0.89809
  Beta virt. eigenvalues --    0.91928   0.92668   0.93177   0.96754   0.97520
  Beta virt. eigenvalues --    0.97920   0.98518   0.98986   1.00456   1.01099
  Beta virt. eigenvalues --    1.03392   1.04555   1.08567   1.10108   1.10476
  Beta virt. eigenvalues --    1.10797   1.11543   1.12620   1.15641   1.15826
  Beta virt. eigenvalues --    1.17254   1.18207   1.19671   1.19779   1.20703
  Beta virt. eigenvalues --    1.23650   1.25394   1.25959   1.26751   1.29127
  Beta virt. eigenvalues --    1.30718   1.31454   1.38259   1.42556   1.44265
  Beta virt. eigenvalues --    1.46037   1.47387   1.47924   1.48187   1.50742
  Beta virt. eigenvalues --    1.52527   1.54585   1.55754   1.57267   1.57610
  Beta virt. eigenvalues --    1.60230   1.64738   1.65873   1.68994   1.69604
  Beta virt. eigenvalues --    1.72451   1.74457   1.78087   1.78776   1.80097
  Beta virt. eigenvalues --    1.80984   1.82376   1.82965   1.83985   1.84320
  Beta virt. eigenvalues --    1.85036   1.86434   1.88944   1.89385   1.89939
  Beta virt. eigenvalues --    1.90440   1.91802   1.92496   1.92568   1.94975
  Beta virt. eigenvalues --    1.96034   1.97634   2.01885   2.04068   2.06104
  Beta virt. eigenvalues --    2.11161   2.14325   2.16243   2.19494   2.21056
  Beta virt. eigenvalues --    2.25510   2.26420   2.29155   2.31242   2.32121
  Beta virt. eigenvalues --    2.33140   2.34266   2.34847   2.35919   2.37553
  Beta virt. eigenvalues --    2.39766   2.46361   2.47647   2.51617   2.52039
  Beta virt. eigenvalues --    2.54674   2.55416   2.57684   2.59362   2.65616
  Beta virt. eigenvalues --    2.66063   2.68380   2.73168   2.74087   2.76926
  Beta virt. eigenvalues --    2.77607   2.79975   2.82265   2.82431   2.83401
  Beta virt. eigenvalues --    2.88357   2.90853   2.94326   2.97088   2.97455
  Beta virt. eigenvalues --    3.02428   3.04196   3.05176   3.06053   3.12902
  Beta virt. eigenvalues --    3.13551   3.15989   3.20083   3.21494   3.24786
  Beta virt. eigenvalues --    3.25576   3.26407   3.27751   3.28682   3.30430
  Beta virt. eigenvalues --    3.31388   3.33651   3.33833   3.36438   3.39642
  Beta virt. eigenvalues --    3.43437   3.44896   3.46357   3.51738   3.53431
  Beta virt. eigenvalues --    3.55289   3.57955   3.68550   3.69820   3.76340
  Beta virt. eigenvalues --    3.81038   3.91897   3.94162   4.11075   4.12990
  Beta virt. eigenvalues --    4.13332   4.16286   4.20475   4.36217   4.36696
  Beta virt. eigenvalues --    4.53923   4.72834   4.77823   4.79063   4.81497
  Beta virt. eigenvalues --    4.91327   5.10098   5.13791   5.61608   5.71668
  Beta virt. eigenvalues --    6.47503   7.45500   7.52827   7.62538  23.19495
  Beta virt. eigenvalues --   23.33474  23.78704  23.79936  23.80149  23.83739
  Beta virt. eigenvalues --   23.84998  23.88275  24.00160  24.02044  24.02816
  Beta virt. eigenvalues --   24.03589  24.11331  24.13070  47.76589  49.91153
  Beta virt. eigenvalues --   49.99788 289.65408 289.72675 289.846081020.51457
          Condensed to atoms (all electrons):
               1          2          3          4          5          6
     1  C    4.965977   0.525294  -0.031040  -0.051226  -0.032072   0.486119
     2  C    0.525294   5.076613   0.423237  -0.070395  -0.056727  -0.043872
     3  C   -0.031040   0.423237   5.157431   0.492415  -0.096651  -0.040814
     4  C   -0.051226  -0.070395   0.492415   5.541389   0.367106  -0.034677
     5  C   -0.032072  -0.056727  -0.096651   0.367106   5.146099   0.494057
     6  C    0.486119  -0.043872  -0.040814  -0.034677   0.494057   5.004679
     7  H    0.400360  -0.042197   0.005898   0.000430   0.005930  -0.042825
     8  H   -0.040368   0.403788  -0.051623   0.005764  -0.000507   0.006115
     9  H    0.006773  -0.000811   0.004825  -0.069684   0.403039  -0.039358
    10  H   -0.043635   0.006248   0.000407   0.007182  -0.043096   0.400601
    11  C   -0.001346   0.006473   0.006746   0.227354  -0.073393   0.011413
    12  O   -0.000004  -0.000038   0.005543  -0.163598   0.023217   0.001307
    13  C    0.009991  -0.070761   0.386142  -0.035078   0.016495  -0.001522
    14  C    0.000325  -0.002406  -0.092342  -0.069635   0.035405  -0.000589
    15  C   -0.000504   0.020376  -0.077800  -0.102575  -0.004319   0.000283
    16  C    0.000004   0.000088  -0.003004   0.033981  -0.001315  -0.000010
    17  C    0.000001  -0.001236   0.016533  -0.001313   0.000043   0.000002
    18  C    0.000000   0.000004   0.000290  -0.000487  -0.000019   0.000000
    19  H    0.000001   0.000001  -0.000262   0.004754  -0.000218  -0.000004
    20  C    0.000000  -0.000009  -0.000226   0.000357   0.000005   0.000000
    21  H    0.000000  -0.000106   0.001965  -0.000022  -0.000008   0.000000
    22  H    0.000000   0.000000  -0.000004   0.000006   0.000000   0.000000
    23  Br   0.000000   0.000000   0.000001  -0.000003   0.000000   0.000000
    24  O    0.000193   0.015707  -0.089937   0.003465  -0.000084   0.000018
    25  H    0.000058  -0.000556   0.004626  -0.000319   0.000048  -0.000004
               7          8          9         10         11         12
     1  C    0.400360  -0.040368   0.006773  -0.043635  -0.001346  -0.000004
     2  C   -0.042197   0.403788  -0.000811   0.006248   0.006473  -0.000038
     3  C    0.005898  -0.051623   0.004825   0.000407   0.006746   0.005543
     4  C    0.000430   0.005764  -0.069684   0.007182   0.227354  -0.163598
     5  C    0.005930  -0.000507   0.403039  -0.043096  -0.073393   0.023217
     6  C   -0.042825   0.006115  -0.039358   0.400601   0.011413   0.001307
     7  H    0.465186  -0.005540  -0.000272  -0.005965   0.000045   0.000000
     8  H   -0.005540   0.466251   0.000084  -0.000301  -0.000090   0.000004
     9  H   -0.000272   0.000084   0.471062  -0.006238  -0.009771   0.025040
    10  H   -0.005965  -0.000301  -0.006238   0.467376  -0.000393  -0.000045
    11  C    0.000045  -0.000090  -0.009771  -0.000393   4.745827   0.760248
    12  O    0.000000   0.000004   0.025040  -0.000045   0.760248   7.822709
    13  C   -0.000458  -0.014596  -0.000083   0.000038  -0.050072  -0.001330
    14  C    0.000006  -0.000099   0.004568  -0.000018   0.187308  -0.171462
    15  C   -0.000008   0.001967  -0.000180   0.000006   0.006176   0.006132
    16  C    0.000000  -0.000003  -0.000226   0.000000  -0.058656   0.025248
    17  C    0.000000  -0.000083   0.000003   0.000000   0.006770  -0.000031
    18  C    0.000000   0.000001  -0.000006   0.000000   0.012674   0.002108
    19  H    0.000000  -0.000001  -0.000103   0.000000  -0.009640   0.027485
    20  C    0.000000  -0.000002   0.000000   0.000000  -0.001245   0.000012
    21  H    0.000000  -0.000030  -0.000001   0.000000  -0.000075   0.000005
    22  H    0.000000   0.000000   0.000000   0.000000   0.000028   0.000000
    23  Br   0.000000   0.000000   0.000000   0.000000  -0.000355  -0.000001
    24  O   -0.000029   0.010967   0.000001   0.000000   0.000178   0.000000
    25  H   -0.000002  -0.000522  -0.000001   0.000000  -0.000171  -0.000001
              13         14         15         16         17         18
     1  C    0.009991   0.000325  -0.000504   0.000004   0.000001   0.000000
     2  C   -0.070761  -0.002406   0.020376   0.000088  -0.001236   0.000004
     3  C    0.386142  -0.092342  -0.077800  -0.003004   0.016533   0.000290
     4  C   -0.035078  -0.069635  -0.102575   0.033981  -0.001313  -0.000487
     5  C    0.016495   0.035405  -0.004319  -0.001315   0.000043  -0.000019
     6  C   -0.001522  -0.000589   0.000283  -0.000010   0.000002   0.000000
     7  H   -0.000458   0.000006  -0.000008   0.000000   0.000000   0.000000
     8  H   -0.014596  -0.000099   0.001967  -0.000003  -0.000083   0.000001
     9  H   -0.000083   0.004568  -0.000180  -0.000226   0.000003  -0.000006
    10  H    0.000038  -0.000018   0.000006   0.000000   0.000000   0.000000
    11  C   -0.050072   0.187308   0.006176  -0.058656   0.006770   0.012674
    12  O   -0.001330  -0.171462   0.006132   0.025248  -0.000031   0.002108
    13  C    4.911930   0.013558   0.286905   0.011241  -0.041425  -0.000638
    14  C    0.013558   5.539795   0.468620   0.350187  -0.031819  -0.027633
    15  C    0.286905   0.468620   5.404352  -0.101334   0.348990  -0.043400
    16  C    0.011241   0.350187  -0.101334   5.217350  -0.058366   0.434565
    17  C   -0.041425  -0.031819   0.348990  -0.058366   5.114548  -0.037871
    18  C   -0.000638  -0.027633  -0.043400   0.434565  -0.037871   5.151062
    19  H    0.000119  -0.067693   0.005572   0.400450  -0.001662  -0.046685
    20  C    0.008279  -0.047434  -0.034571  -0.032915   0.536213   0.452015
    21  H    0.007261   0.002188  -0.089645  -0.000030   0.392720   0.005569
    22  H   -0.000367  -0.000146   0.006257   0.006210  -0.035358  -0.050066
    23  Br  -0.000004   0.010268  -0.000467  -0.089897   0.009602   0.281366
    24  O    0.361778   0.003140  -0.074387  -0.000105  -0.004371  -0.000036
    25  H   -0.063106   0.001289  -0.016289   0.000027   0.018106   0.000002
              19         20         21         22         23         24
     1  C    0.000001   0.000000   0.000000   0.000000   0.000000   0.000193
     2  C    0.000001  -0.000009  -0.000106   0.000000   0.000000   0.015707
     3  C   -0.000262  -0.000226   0.001965  -0.000004   0.000001  -0.089937
     4  C    0.004754   0.000357  -0.000022   0.000006  -0.000003   0.003465
     5  C   -0.000218   0.000005  -0.000008   0.000000   0.000000  -0.000084
     6  C   -0.000004   0.000000   0.000000   0.000000   0.000000   0.000018
     7  H    0.000000   0.000000   0.000000   0.000000   0.000000  -0.000029
     8  H   -0.000001  -0.000002  -0.000030   0.000000   0.000000   0.010967
     9  H   -0.000103   0.000000  -0.000001   0.000000   0.000000   0.000001
    10  H    0.000000   0.000000   0.000000   0.000000   0.000000   0.000000
    11  C   -0.009640  -0.001245  -0.000075   0.000028  -0.000355   0.000178
    12  O    0.027485   0.000012   0.000005   0.000000  -0.000001   0.000000
    13  C    0.000119   0.008279   0.007261  -0.000367  -0.000004   0.361778
    14  C   -0.067693  -0.047434   0.002188  -0.000146   0.010268   0.003140
    15  C    0.005572  -0.034571  -0.089645   0.006257  -0.000467  -0.074387
    16  C    0.400450  -0.032915  -0.000030   0.006210  -0.089897  -0.000105
    17  C   -0.001662   0.536213   0.392720  -0.035358   0.009602  -0.004371
    18  C   -0.046685   0.452015   0.005569  -0.050066   0.281366  -0.000036
    19  H    0.455775   0.007649   0.000086  -0.000153  -0.004814   0.000002
    20  C    0.007649   4.961471  -0.012046   0.399918  -0.078872   0.001381
    21  H    0.000086  -0.012046   0.475829  -0.005634  -0.000261  -0.004048
    22  H   -0.000153   0.399918  -0.005634   0.443790  -0.004504   0.000005
    23  Br  -0.004814  -0.078872  -0.000261  -0.004504  34.910291   0.000000
    24  O    0.000002   0.001381  -0.004048   0.000005   0.000000   7.929299
    25  H    0.000001   0.000535   0.014855   0.000042  -0.000001   0.288139
              25
     1  C    0.000058
     2  C   -0.000556
     3  C    0.004626
     4  C   -0.000319
     5  C    0.000048
     6  C   -0.000004
     7  H   -0.000002
     8  H   -0.000522
     9  H   -0.000001
    10  H    0.000000
    11  C   -0.000171
    12  O   -0.000001
    13  C   -0.063106
    14  C    0.001289
    15  C   -0.016289
    16  C    0.000027
    17  C    0.018106
    18  C    0.000002
    19  H    0.000001
    20  C    0.000535
    21  H    0.014855
    22  H    0.000042
    23  Br  -0.000001
    24  O    0.288139
    25  H    0.317455
          Atomic-Atomic Spin Densities.
               1          2          3          4          5          6
     1  C   -0.044588   0.015619  -0.002190   0.002870  -0.001474  -0.013008
     2  C    0.015619   0.110677  -0.014122   0.007363  -0.000074  -0.007596
     3  C   -0.002190  -0.014122  -0.066954  -0.020915   0.003956   0.002884
     4  C    0.002870   0.007363  -0.020915   0.125700  -0.011720  -0.008293
     5  C   -0.001474  -0.000074   0.003956  -0.011720  -0.046939   0.014327
     6  C   -0.013008  -0.007596   0.002884  -0.008293   0.014327   0.114769
     7  H    0.000513  -0.000274   0.000059  -0.000030   0.000014  -0.000077
     8  H    0.000538  -0.000874   0.000950  -0.000069   0.000030  -0.000054
     9  H   -0.000036   0.000039  -0.000027   0.001192   0.000502  -0.000346
    10  H    0.000206  -0.000019  -0.000045   0.000018  -0.000161  -0.000448
    11  C    0.000070   0.000080  -0.001162   0.025387   0.000111  -0.000483
    12  O   -0.000003  -0.000006   0.000230  -0.005453   0.000723   0.000046
    13  C   -0.000732  -0.012362   0.036965  -0.013078   0.000086   0.000383
    14  C    0.000012   0.000033  -0.001528   0.003232  -0.000412  -0.000035
    15  C    0.000011  -0.000546  -0.002391  -0.001534  -0.000084   0.000015
    16  C    0.000000  -0.000013  -0.000182  -0.000258   0.000061   0.000000
    17  C    0.000000   0.000084  -0.000382   0.000057  -0.000010   0.000000
    18  C    0.000000   0.000000   0.000016  -0.000041   0.000000   0.000000
    19  H    0.000000   0.000000  -0.000005  -0.000057   0.000010   0.000000
    20  C    0.000000   0.000000  -0.000002   0.000015   0.000000   0.000000
    21  H    0.000000   0.000006  -0.000041  -0.000005   0.000000   0.000000
    22  H    0.000000   0.000000   0.000001   0.000000   0.000000   0.000000
    23  Br   0.000000   0.000000   0.000000   0.000001   0.000000   0.000000
    24  O    0.000026   0.002725  -0.002695   0.000428  -0.000005  -0.000007
    25  H   -0.000003   0.000004  -0.000006  -0.000019  -0.000002   0.000000
               7          8          9         10         11         12
     1  C    0.000513   0.000538  -0.000036   0.000206   0.000070  -0.000003
     2  C   -0.000274  -0.000874   0.000039  -0.000019   0.000080  -0.000006
     3  C    0.000059   0.000950  -0.000027  -0.000045  -0.001162   0.000230
     4  C   -0.000030  -0.000069   0.001192   0.000018   0.025387  -0.005453
     5  C    0.000014   0.000030   0.000502  -0.000161   0.000111   0.000723
     6  C   -0.000077  -0.000054  -0.000346  -0.000448  -0.000483   0.000046
     7  H    0.001299   0.000024  -0.000001   0.000056  -0.000001   0.000000
     8  H    0.000024  -0.005501  -0.000001   0.000004  -0.000003   0.000000
     9  H   -0.000001  -0.000001   0.000558   0.000062   0.000106  -0.000513
    10  H    0.000056   0.000004   0.000062  -0.005407   0.000007   0.000001
    11  C   -0.000001  -0.000003   0.000106   0.000007  -0.001560  -0.031406
    12  O    0.000000   0.000000  -0.000513   0.000001  -0.031406   0.194515
    13  C   -0.000003   0.000063  -0.000016   0.000000  -0.001555   0.000124
    14  C    0.000000  -0.000010  -0.000058   0.000000   0.025724  -0.006080
    15  C    0.000001  -0.000049  -0.000005   0.000000  -0.001829   0.000301
    16  C    0.000000   0.000000   0.000009   0.000000  -0.000205   0.000601
    17  C    0.000000   0.000007   0.000000   0.000000   0.000142  -0.000006
    18  C    0.000000   0.000000   0.000000   0.000000  -0.000460   0.000039
    19  H    0.000000   0.000000   0.000005   0.000000   0.000076  -0.000562
    20  C    0.000000   0.000000   0.000000   0.000000   0.000031  -0.000003
    21  H    0.000000   0.000002   0.000000   0.000000  -0.000005   0.000000
    22  H    0.000000   0.000000   0.000000   0.000000  -0.000001   0.000000
    23  Br   0.000000   0.000000   0.000000   0.000000   0.000013  -0.000003
    24  O    0.000000  -0.000133   0.000000   0.000000   0.000046   0.000000
    25  H    0.000000   0.000014   0.000000   0.000000   0.000010   0.000000
              13         14         15         16         17         18
     1  C   -0.000732   0.000012   0.000011   0.000000   0.000000   0.000000
     2  C   -0.012362   0.000033  -0.000546  -0.000013   0.000084   0.000000
     3  C    0.036965  -0.001528  -0.002391  -0.000182  -0.000382   0.000016
     4  C   -0.013078   0.003232  -0.001534  -0.000258   0.000057  -0.000041
     5  C    0.000086  -0.000412  -0.000084   0.000061  -0.000010   0.000000
     6  C    0.000383  -0.000035   0.000015   0.000000   0.000000   0.000000
     7  H   -0.000003   0.000000   0.000001   0.000000   0.000000   0.000000
     8  H    0.000063  -0.000010  -0.000049   0.000000   0.000007   0.000000
     9  H   -0.000016  -0.000058  -0.000005   0.000009   0.000000   0.000000
    10  H    0.000000   0.000000   0.000000   0.000000   0.000000   0.000000
    11  C   -0.001555   0.025724  -0.001829  -0.000205   0.000142  -0.000460
    12  O    0.000124  -0.006080   0.000301   0.000601  -0.000006   0.000039
    13  C    0.469466  -0.012918   0.046125   0.000261  -0.013598   0.000407
    14  C   -0.012918   0.153877  -0.031018  -0.010345   0.008639  -0.009005
    15  C    0.046125  -0.031018  -0.047009   0.004570  -0.020540   0.003154
    16  C    0.000261  -0.010345   0.004570  -0.060658  -0.000431   0.013157
    17  C   -0.013598   0.008639  -0.020540  -0.000431   0.114633  -0.008105
    18  C    0.000407  -0.009005   0.003154   0.013157  -0.008105   0.135656
    19  H   -0.000017   0.001309   0.000002   0.000772   0.000041  -0.000426
    20  C   -0.000794   0.002387  -0.001282  -0.000448   0.015409  -0.014124
    21  H   -0.000074  -0.000016   0.001050   0.000010  -0.000596  -0.000028
    22  H   -0.000003  -0.000030   0.000076   0.000013  -0.000299  -0.000071
    23  Br  -0.000003   0.000344  -0.000097  -0.000561   0.000237  -0.011957
    24  O   -0.103398   0.000595  -0.003176  -0.000002   0.002801  -0.000008
    25  H    0.000222   0.000006   0.000219   0.000003  -0.000023  -0.000004
              19         20         21         22         23         24
     1  C    0.000000   0.000000   0.000000   0.000000   0.000000   0.000026
     2  C    0.000000   0.000000   0.000006   0.000000   0.000000   0.002725
     3  C   -0.000005  -0.000002  -0.000041   0.000001   0.000000  -0.002695
     4  C   -0.000057   0.000015  -0.000005   0.000000   0.000001   0.000428
     5  C    0.000010   0.000000   0.000000   0.000000   0.000000  -0.000005
     6  C    0.000000   0.000000   0.000000   0.000000   0.000000  -0.000007
     7  H    0.000000   0.000000   0.000000   0.000000   0.000000   0.000000
     8  H    0.000000   0.000000   0.000002   0.000000   0.000000  -0.000133
     9  H    0.000005   0.000000   0.000000   0.000000   0.000000   0.000000
    10  H    0.000000   0.000000   0.000000   0.000000   0.000000   0.000000
    11  C    0.000076   0.000031  -0.000005  -0.000001   0.000013   0.000046
    12  O   -0.000562  -0.000003   0.000000   0.000000  -0.000003   0.000000
    13  C   -0.000017  -0.000794  -0.000074  -0.000003  -0.000003  -0.103398
    14  C    0.001309   0.002387  -0.000016  -0.000030   0.000344   0.000595
    15  C    0.000002  -0.001282   0.001050   0.000076  -0.000097  -0.003176
    16  C    0.000772  -0.000448   0.000010   0.000013  -0.000561  -0.000002
    17  C    0.000041   0.015409  -0.000596  -0.000299   0.000237   0.002801
    18  C   -0.000426  -0.014124  -0.000028  -0.000071  -0.011957  -0.000008
    19  H    0.000827  -0.000063  -0.000001  -0.000001   0.000041   0.000000
    20  C   -0.000063  -0.048071   0.000259   0.000597   0.001708   0.000029
    21  H   -0.000001   0.000259  -0.005295   0.000021   0.000002   0.000177
    22  H   -0.000001   0.000597   0.000021   0.001395   0.000041   0.000000
    23  Br   0.000041   0.001708   0.000002   0.000041   0.016050   0.000000
    24  O    0.000000   0.000029   0.000177   0.000000   0.000000   0.214845
    25  H    0.000000   0.000049  -0.000203   0.000001   0.000000  -0.001732
              25
     1  C   -0.000003
     2  C    0.000004
     3  C   -0.000006
     4  C   -0.000019
     5  C   -0.000002
     6  C    0.000000
     7  H    0.000000
     8  H    0.000014
     9  H    0.000000
    10  H    0.000000
    11  C    0.000010
    12  O    0.000000
    13  C    0.000222
    14  C    0.000006
    15  C    0.000219
    16  C    0.000003
    17  C   -0.000023
    18  C   -0.000004
    19  H    0.000000
    20  C    0.000049
    21  H   -0.000203
    22  H    0.000001
    23  Br   0.000000
    24  O   -0.001732
    25  H   -0.003084
 Mulliken charges and spin densities:
               1          2
     1  C   -0.194902  -0.042169
     2  C   -0.188716   0.100746
     3  C   -0.022356  -0.067586
     4  C   -0.085191   0.104789
     5  C   -0.183035  -0.041061
     6  C   -0.200920   0.102075
     7  H    0.219441   0.001580
     8  H    0.218826  -0.005062
     9  H    0.211339   0.001469
    10  H    0.217833  -0.005727
    11  C    0.233966   0.013135
    12  O   -0.362548   0.152543
    13  C    0.265700   0.395551
    14  C   -0.105379   0.124704
    15  C   -0.010156  -0.054036
    16  C   -0.133489  -0.053646
    17  C   -0.229995   0.098059
    18  C   -0.132814   0.108201
    19  H    0.229341   0.001950
    20  C   -0.160517  -0.044305
    21  H    0.211430  -0.004735
    22  H    0.239977   0.001738
    23  Br  -0.032350   0.005816
    24  O   -0.441276   0.110517
    25  H    0.435790  -0.004547
 Sum of Mulliken charges =   0.00000   1.00000
 Mulliken charges and spin densities with hydrogens summed into heavy atoms:
               1          2
     1  C    0.024539  -0.040589
     2  C    0.030111   0.095684
     3  C   -0.022356  -0.067586
     4  C   -0.085191   0.104789
     5  C    0.028304  -0.039592
     6  C    0.016913   0.096348
    11  C    0.233966   0.013135
    12  O   -0.362548   0.152543
    13  C    0.265700   0.395551
    14  C   -0.105379   0.124704
    15  C   -0.010156  -0.054036
    16  C    0.095851  -0.051696
    17  C   -0.018564   0.093323
    18  C   -0.132814   0.108201
    20  C    0.079460  -0.042566
    23  Br  -0.032350   0.005816
    24  O   -0.005486   0.105969
 Electronic spatial extent (au):  <R**2>=           6275.4544
 Charge=              0.0000 electrons
 Dipole moment (field-independent basis, Debye):
    X=              2.0509    Y=              7.3335    Z=              0.0018  Tot=              7.6148
 Quadrupole moment (field-independent basis, Debye-Ang):
   XX=            -98.9555   YY=           -100.3156   ZZ=           -113.9862
   XY=             -1.5583   XZ=              0.0011   YZ=             -0.0028
 Traceless Quadrupole moment (field-independent basis, Debye-Ang):
   XX=              5.4636   YY=              4.1035   ZZ=             -9.5671
   XY=             -1.5583   XZ=              0.0011   YZ=             -0.0028
 Octapole moment (field-independent basis, Debye-Ang**2):
  XXX=            -25.4291  YYY=             69.0910  ZZZ=              0.0042  XYY=            -43.4060
  XXY=            -10.1497  XXZ=              0.0004  XZZ=            -51.2878  YZZ=             -3.3083
  YYZ=              0.0182  XYZ=             -0.0048
 Hexadecapole moment (field-independent basis, Debye-Ang**3):
 XXXX=          -5378.3853 YYYY=          -1241.0764 ZZZZ=           -125.7855 XXXY=             10.0743
 XXXZ=             -0.0081 YYYX=             53.7209 YYYZ=              0.0025 ZZZX=             -0.0105
 ZZZY=              0.0096 XXYY=          -1146.1766 XXZZ=          -1104.0102 YYZZ=           -257.2652
 XXYZ=             -0.0294 YYXZ=              0.0130 ZZXY=             32.2451
 N-N= 1.392860095151D+03 E-N=-1.054400333867D+04  KE= 3.257662956073D+03
                          Isotropic Fermi Contact Couplings
        Atom                 a.u.       MegaHertz       Gauss      10(-4) cm-1
     1  C(13)              0.00500       5.62594       2.00747       1.87661
     2  C(13)             -0.00049      -0.55110      -0.19665      -0.18383
     3  C(13)             -0.00379      -4.26286      -1.52109      -1.42194
     4  C(13)             -0.01101     -12.37436      -4.41548      -4.12764
     5  C(13)              0.00894      10.04533       3.58442       3.35076
     6  C(13)             -0.00752      -8.45346      -3.01640      -2.81977
     7  H(1)              -0.00177      -7.90140      -2.81942      -2.63562
     8  H(1)              -0.00076      -3.41651      -1.21910      -1.13963
     9  H(1)              -0.00246     -10.99645      -3.92381      -3.66802
    10  H(1)               0.00008       0.35772       0.12764       0.11932
    11  C(13)              0.00794       8.93074       3.18671       2.97897
    12  O(17)              0.01001      -6.06757      -2.16506      -2.02392
    13  C(13)              0.00725       8.15059       2.90833       2.71874
    14  C(13)             -0.01290     -14.50009      -5.17399      -4.83671
    15  C(13)             -0.00650      -7.30457      -2.60645      -2.43654
    16  C(13)              0.01464      16.45536       5.87168       5.48892
    17  C(13)              0.00184       2.06656       0.73740       0.68933
    18  C(13)             -0.01444     -16.23229      -5.79208      -5.41451
    19  H(1)              -0.00400     -17.86077      -6.37317      -5.95771
    20  C(13)              0.00687       7.72495       2.75646       2.57677
    21  H(1)              -0.00161      -7.19802      -2.56843      -2.40100
    22  H(1)              -0.00260     -11.63901      -4.15309      -3.88236
    23  Br(79)            -0.00180      -2.02546      -0.72273      -0.67562
    24  O(17)              0.00005      -0.02782      -0.00993      -0.00928
    25  H(1)              -0.00008      -0.34265      -0.12227      -0.11430
 --------------------------------------------------------
       Center         ----  Spin Dipole Couplings  ----
                      3XX-RR        3YY-RR        3ZZ-RR
 --------------------------------------------------------
     1   Atom       -0.062901     -0.065237      0.128138
     2   Atom       -0.026400     -0.027643      0.054043
     3   Atom        0.001920     -0.002853      0.000933
     4   Atom        0.014211      0.005336     -0.019547
     5   Atom       -0.088135     -0.089582      0.177717
     6   Atom        0.006409      0.004444     -0.010853
     7   Atom        0.007387     -0.005941     -0.001447
     8   Atom       -0.002020      0.003934     -0.001914
     9   Atom       -0.007588      0.010071     -0.002483
    10   Atom        0.000706      0.001700     -0.002406
    11   Atom       -0.108749     -0.103765      0.212514
    12   Atom       -0.221821     -0.232264      0.454084
    13   Atom       -0.060070     -0.063052      0.123122
    14   Atom        0.013800      0.002165     -0.015965
    15   Atom        0.009789      0.009117     -0.018906
    16   Atom       -0.144649     -0.142588      0.287237
    17   Atom       -0.059695     -0.062474      0.122170
    18   Atom        0.011188      0.017895     -0.029083
    19   Atom       -0.013516      0.016002     -0.002486
    20   Atom       -0.094134     -0.095344      0.189478
    21   Atom       -0.007185      0.009194     -0.002009
    22   Atom        0.000504      0.001468     -0.001972
    23   Atom        0.028574      0.013103     -0.041677
    24   Atom       -0.020528     -0.019195      0.039724
    25   Atom        0.000862      0.002199     -0.003061
 --------------------------------------------------------
                        XY            XZ            YZ
 --------------------------------------------------------
     1   Atom        0.000601     -0.000001      0.000020
     2   Atom       -0.001302     -0.000009     -0.000001
     3   Atom        0.001381      0.000007      0.000001
     4   Atom       -0.002118      0.000018      0.000000
     5   Atom        0.000687      0.000001      0.000029
     6   Atom        0.003792      0.000000      0.000000
     7   Atom        0.006739      0.000000      0.000001
     8   Atom        0.002562      0.000000      0.000001
     9   Atom        0.002824      0.000000     -0.000002
    10   Atom       -0.001013      0.000000      0.000000
    11   Atom        0.000439     -0.000029     -0.000077
    12   Atom       -0.002954     -0.000096     -0.000375
    13   Atom       -0.000438     -0.000024     -0.000070
    14   Atom       -0.001069     -0.000027      0.000014
    15   Atom       -0.003797      0.000001     -0.000002
    16   Atom       -0.000826      0.000007      0.000052
    17   Atom        0.001874      0.000000     -0.000006
    18   Atom       -0.005137     -0.000003     -0.000002
    19   Atom        0.006852     -0.000001     -0.000002
    20   Atom       -0.001034     -0.000008      0.000027
    21   Atom        0.002593      0.000002      0.000002
    22   Atom       -0.013701      0.000001      0.000000
    23   Atom        0.001988      0.000013     -0.000001
    24   Atom        0.000083      0.000040     -0.000040
    25   Atom       -0.000149     -0.000003      0.000004
 --------------------------------------------------------


 ---------------------------------------------------------------------------------
              Anisotropic Spin Dipole Couplings in Principal Axis System
 ---------------------------------------------------------------------------------

       Atom             a.u.   MegaHertz   Gauss  10(-4) cm-1        Axes

              Baa    -0.0654    -8.774    -3.131    -2.927 -0.2355  0.9719 -0.0001
     1 C(13)  Bbb    -0.0628    -8.421    -3.005    -2.809  0.9719  0.2355  0.0000
              Bcc     0.1281    17.195     6.136     5.736  0.0000  0.0001  1.0000
 
              Baa    -0.0285    -3.820    -1.363    -1.274  0.5334  0.8459  0.0001
     2 C(13)  Bbb    -0.0256    -3.432    -1.225    -1.145  0.8459 -0.5334  0.0001
              Bcc     0.0540     7.252     2.588     2.419 -0.0001  0.0000  1.0000
 
              Baa    -0.0032    -0.433    -0.154    -0.144 -0.2593  0.9658  0.0002
     3 C(13)  Bbb     0.0009     0.125     0.045     0.042 -0.0051 -0.0016  1.0000
              Bcc     0.0023     0.307     0.110     0.103  0.9658  0.2593  0.0054
 
              Baa    -0.0195    -2.623    -0.936    -0.875 -0.0005  0.0000  1.0000
     4 C(13)  Bbb     0.0049     0.652     0.233     0.217  0.2208  0.9753  0.0001
              Bcc     0.0147     1.971     0.703     0.658  0.9753 -0.2208  0.0005
 
              Baa    -0.0899   -12.058    -4.303    -4.022 -0.3707  0.9287 -0.0001
     5 C(13)  Bbb    -0.0879   -11.790    -4.207    -3.933  0.9287  0.3707  0.0000
              Bcc     0.1777    23.848     8.510     7.955  0.0000  0.0001  1.0000
 
              Baa    -0.0109    -1.456    -0.520    -0.486  0.0000  0.0000  1.0000
     6 C(13)  Bbb     0.0015     0.202     0.072     0.068 -0.6120  0.7908  0.0000
              Bcc     0.0093     1.254     0.447     0.418  0.7908  0.6120  0.0000
 
              Baa    -0.0088    -4.671    -1.667    -1.558 -0.3853  0.9228 -0.0001
     7 H(1)   Bbb    -0.0014    -0.772    -0.275    -0.257  0.0000  0.0001  1.0000
              Bcc     0.0102     5.443     1.942     1.816  0.9228  0.3853  0.0000
 
              Baa    -0.0030    -1.585    -0.566    -0.529  0.9376 -0.3478  0.0006
     8 H(1)   Bbb    -0.0019    -1.021    -0.364    -0.341 -0.0005  0.0001  1.0000
              Bcc     0.0049     2.606     0.930     0.869  0.3478  0.9376  0.0001
 
              Baa    -0.0080    -4.284    -1.528    -1.429  0.9880 -0.1542 -0.0001
     9 H(1)   Bbb    -0.0025    -1.325    -0.473    -0.442  0.0001  0.0001  1.0000
              Bcc     0.0105     5.608     2.001     1.871  0.1542  0.9880 -0.0001
 
              Baa    -0.0024    -1.284    -0.458    -0.428  0.0000  0.0001  1.0000
    10 H(1)   Bbb     0.0001     0.040     0.014     0.013  0.8487  0.5288  0.0000
              Bcc     0.0023     1.244     0.444     0.415 -0.5288  0.8487 -0.0001
 
              Baa    -0.1088   -14.598    -5.209    -4.869  0.9962 -0.0870  0.0001
    11 C(13)  Bbb    -0.1037   -13.919    -4.967    -4.643  0.0870  0.9962  0.0003
              Bcc     0.2125    28.517    10.176     9.512 -0.0001 -0.0002  1.0000
 
              Baa    -0.2330    16.863     6.017     5.625  0.2546  0.9670  0.0006
    12 O(17)  Bbb    -0.2210    15.995     5.707     5.335  0.9670 -0.2546  0.0000
              Bcc     0.4541   -32.857   -11.724   -10.960 -0.0001 -0.0005  1.0000
 
              Baa    -0.0631    -8.469    -3.022    -2.825  0.1423  0.9898  0.0004
    13 C(13)  Bbb    -0.0600    -8.052    -2.873    -2.686  0.9898 -0.1423  0.0001
              Bcc     0.1231    16.522     5.895     5.511 -0.0001 -0.0004  1.0000
 
              Baa    -0.0160    -2.142    -0.764    -0.715  0.0009 -0.0007  1.0000
    14 C(13)  Bbb     0.0021     0.278     0.099     0.093  0.0907  0.9959  0.0006
              Bcc     0.0139     1.865     0.665     0.622  0.9959 -0.0907 -0.0010
 
              Baa    -0.0189    -2.537    -0.905    -0.846  0.0000  0.0001  1.0000
    15 C(13)  Bbb     0.0056     0.757     0.270     0.253  0.6752  0.7377  0.0000
              Bcc     0.0133     1.780     0.635     0.594  0.7377 -0.6752  0.0001
 
              Baa    -0.1449   -19.449    -6.940    -6.488  0.9435  0.3315 -0.0001
    16 C(13)  Bbb    -0.1423   -19.095    -6.814    -6.369 -0.3315  0.9435 -0.0001
              Bcc     0.2872    38.544    13.754    12.857  0.0000  0.0001  1.0000
 
              Baa    -0.0634    -8.510    -3.037    -2.839 -0.4497  0.8932  0.0000
    17 C(13)  Bbb    -0.0588    -7.884    -2.813    -2.630  0.8932  0.4497  0.0000
              Bcc     0.1222    16.394     5.850     5.468  0.0000  0.0000  1.0000
 
              Baa    -0.0291    -3.903    -1.393    -1.302  0.0001  0.0001  1.0000
    18 C(13)  Bbb     0.0084     1.128     0.403     0.376  0.8794  0.4761 -0.0001
              Bcc     0.0207     2.775     0.990     0.925 -0.4761  0.8794  0.0000
 
              Baa    -0.0150    -8.019    -2.861    -2.675  0.9765 -0.2156  0.0000
    19 H(1)   Bbb    -0.0025    -1.326    -0.473    -0.442  0.0000  0.0001  1.0000
              Bcc     0.0175     9.345     3.335     3.117  0.2156  0.9765 -0.0001
 
              Baa    -0.0959   -12.874    -4.594    -4.294  0.4976  0.8674 -0.0001
    20 C(13)  Bbb    -0.0935   -12.552    -4.479    -4.187  0.8674 -0.4976  0.0001
              Bcc     0.1895    25.426     9.073     8.481  0.0000  0.0001  1.0000
 
              Baa    -0.0076    -4.047    -1.444    -1.350  0.9883 -0.1527 -0.0002
    21 H(1)   Bbb    -0.0020    -1.072    -0.382    -0.358  0.0002 -0.0002  1.0000
              Bcc     0.0096     5.119     1.827     1.708  0.1527  0.9883  0.0002
 
              Baa    -0.0127    -6.788    -2.422    -2.264  0.7194  0.6946 -0.0001
    22 H(1)   Bbb    -0.0020    -1.052    -0.376    -0.351  0.0000  0.0001  1.0000
              Bcc     0.0147     7.841     2.798     2.615 -0.6946  0.7194  0.0000
 
              Baa    -0.0417    -5.590    -1.995    -1.865 -0.0002  0.0000  1.0000
    23 Br(79) Bbb     0.0129     1.724     0.615     0.575 -0.1255  0.9921 -0.0001
              Bcc     0.0288     3.867     1.380     1.290  0.9921  0.1255  0.0002
 
              Baa    -0.0205     1.486     0.530     0.496  0.9981 -0.0621 -0.0007
    24 O(17)  Bbb    -0.0192     1.389     0.495     0.463  0.0621  0.9981  0.0006
              Bcc     0.0397    -2.874    -1.026    -0.959  0.0007 -0.0007  1.0000
 
              Baa    -0.0031    -1.633    -0.583    -0.545  0.0008 -0.0008  1.0000
    25 H(1)   Bbb     0.0008     0.451     0.161     0.151  0.9940  0.1093 -0.0007
              Bcc     0.0022     1.182     0.422     0.394 -0.1093  0.9940  0.0009
 

 ---------------------------------------------------------------------------------

 D1PCM: PCM CHGder 1st derivatives, ID1Alg=3 FixD1E=F DoIter=F DoCFld=F I1PDM=6.
 Calling FoFJK, ICntrl=  10005127 FMM=F ISym2X=0 I1Cent= 0 IOpClX= 1 NMat=1 NMatS=1 NMatT=0.
 ***** Axes restored to original set *****
 -------------------------------------------------------------------
 Center     Atomic                   Forces (Hartrees/Bohr)
 Number     Number              X              Y              Z
 -------------------------------------------------------------------
      1        6          -0.012103020   -0.014295917   -0.000004741
      2        6           0.010035475    0.008770845    0.000002211
      3        6           0.000840307    0.027469731    0.000023129
      4        6           0.014052428   -0.008223743   -0.000013526
      5        6           0.009476014   -0.000966186   -0.000000999
      6        6          -0.010153699    0.013546265    0.000003140
      7        1           0.000344113   -0.000122739   -0.000000192
      8        1          -0.001893175   -0.000076916    0.000002602
      9        1           0.001067723    0.001031243   -0.000001158
     10        1          -0.000425676    0.000265434    0.000000508
     11        6          -0.003399602    0.044320009    0.000078263
     12        8           0.006456217   -0.032329583   -0.000024236
     13        6           0.029773983   -0.143063926   -0.000056412
     14        6          -0.018889458   -0.015489876   -0.000015066
     15        6          -0.011136115    0.017188691    0.000018442
     16        6          -0.002318318   -0.011313900   -0.000001348
     17        6          -0.022499857   -0.000718577    0.000002897
     18        6           0.002657303    0.023073549    0.000003434
     19        1          -0.001111876    0.000886529   -0.000000827
     20        6           0.026847733   -0.010056454   -0.000005420
     21        1           0.008909801    0.004412139    0.000007597
     22        1          -0.000295795   -0.000543150   -0.000000029
     23       35          -0.001309155    0.000376183    0.000000469
     24        8          -0.029472963    0.079198466   -0.000012514
     25        1           0.004547612    0.016661882   -0.000006225
 -------------------------------------------------------------------
 Cartesian Forces:  Max     0.143063926 RMS     0.022183803

 GradGradGradGradGradGradGradGradGradGradGradGradGradGradGradGradGradGrad
 Berny optimization.
 FormGI is forming the generalized inverse of G from B-inverse, IUseBI=4.
 Internal  Forces:  Max     0.098916769 RMS     0.010672214
 Search for a local minimum.
 Step number   1 out of a maximum of  146
 All quantities printed in internal units (Hartrees-Bohrs-Radians)
 Mixed Optimization -- RFO/linear search
 Second derivative matrix not updated -- first step.
 ITU=  0
     Eigenvalues ---    0.00885   0.00896   0.01276   0.01537   0.01620
     Eigenvalues ---    0.01669   0.01728   0.01803   0.01869   0.02148
     Eigenvalues ---    0.02148   0.02161   0.02165   0.02169   0.02171
     Eigenvalues ---    0.02177   0.02186   0.02191   0.02193   0.02199
     Eigenvalues ---    0.02216   0.04043   0.16000   0.16000   0.16000
     Eigenvalues ---    0.16000   0.16000   0.16000   0.16000   0.16000
     Eigenvalues ---    0.17560   0.22000   0.22440   0.22587   0.23522
     Eigenvalues ---    0.24495   0.24622   0.25000   0.25000   0.25000
     Eigenvalues ---    0.25000   0.25000   0.25000   0.31974   0.32565
     Eigenvalues ---    0.33315   0.33555   0.35475   0.35479   0.35611
     Eigenvalues ---    0.35612   0.35627   0.35665   0.35748   0.39104
     Eigenvalues ---    0.41464   0.42267   0.42484   0.44806   0.45323
     Eigenvalues ---    0.46044   0.46182   0.46701   0.46962   0.47038
     Eigenvalues ---    0.47401   0.55473   0.94375   0.94730
 RFO step:  Lambda=-2.60275866D-02 EMin= 8.85066806D-03
 Linear search not attempted -- first point.
 Iteration  1 RMS(Cart)=  0.04041201 RMS(Int)=  0.00248636
 Iteration  2 RMS(Cart)=  0.00370955 RMS(Int)=  0.00008708
 Iteration  3 RMS(Cart)=  0.00002029 RMS(Int)=  0.00008637
 Iteration  4 RMS(Cart)=  0.00000000 RMS(Int)=  0.00008637
 Variable       Old X    -DE/DX   Delta X   Delta X   Delta X     New X
                                 (Linear)    (Quad)   (Total)
    R1        2.62773   0.01096   0.00000   0.02236   0.02237   2.65009
    R2        2.64014  -0.00818   0.00000  -0.01648  -0.01647   2.62367
    R3        2.04910  -0.00036   0.00000  -0.00095  -0.00095   2.04815
    R4        2.64091   0.00242   0.00000   0.00505   0.00505   2.64596
    R5        2.04694   0.00029   0.00000   0.00077   0.00077   2.04771
    R6        2.66092   0.00057   0.00000   0.00043   0.00038   2.66130
    R7        2.81480  -0.02600   0.00000  -0.07297  -0.07279   2.74201
    R8        2.64140  -0.00180   0.00000  -0.00409  -0.00409   2.63731
    R9        2.81242  -0.00606   0.00000  -0.01640  -0.01662   2.79580
   R10        2.62738   0.01360   0.00000   0.02722   0.02722   2.65460
   R11        2.04693  -0.00078   0.00000  -0.00204  -0.00204   2.04488
   R12        2.04904   0.00014   0.00000   0.00036   0.00036   2.04939
   R13        2.30827   0.03296   0.00000   0.03387   0.03387   2.34213
   R14        2.82273  -0.01139   0.00000  -0.03100  -0.03118   2.79155
   R15        2.81555  -0.01567   0.00000  -0.04376  -0.04354   2.77202
   R16        2.30979   0.09892   0.00000   0.10200   0.10200   2.41179
   R17        2.65520   0.00476   0.00000   0.01081   0.01086   2.66606
   R18        2.63921   0.00463   0.00000   0.00934   0.00936   2.64857
   R19        2.64090   0.00720   0.00000   0.01523   0.01522   2.65612
   R20        2.62243   0.01451   0.00000   0.02840   0.02842   2.65085
   R21        2.04478  -0.00107   0.00000  -0.00279  -0.00279   2.04198
   R22        2.62463   0.01791   0.00000   0.03588   0.03586   2.66049
   R23        2.04669   0.00240   0.00000   0.00628   0.00628   2.05297
   R24        2.63780  -0.01274   0.00000  -0.02635  -0.02636   2.61145
   R25        3.61788  -0.00136   0.00000  -0.00673  -0.00673   3.61115
   R26        2.04609  -0.00059   0.00000  -0.00153  -0.00153   2.04456
   R27        1.81414   0.01252   0.00000   0.02155   0.02155   1.83569
    A1        2.09564  -0.00373   0.00000  -0.01398  -0.01398   2.08167
    A2        2.09223   0.00186   0.00000   0.00695   0.00695   2.09918
    A3        2.09531   0.00187   0.00000   0.00703   0.00703   2.10234
    A4        2.09987  -0.00096   0.00000  -0.00322  -0.00323   2.09664
    A5        2.11087  -0.00143   0.00000  -0.00865  -0.00865   2.10222
    A6        2.07245   0.00239   0.00000   0.01187   0.01188   2.08433
    A7        2.08759   0.00545   0.00000   0.02013   0.02005   2.10763
    A8        2.07849   0.00221   0.00000   0.00938   0.00932   2.08780
    A9        2.11711  -0.00766   0.00000  -0.02951  -0.02936   2.08775
   A10        2.08836  -0.00511   0.00000  -0.01978  -0.01967   2.06869
   A11        2.11681   0.00018   0.00000   0.00101   0.00074   2.11756
   A12        2.07801   0.00493   0.00000   0.01877   0.01892   2.09694
   A13        2.09959   0.00170   0.00000   0.00580   0.00578   2.10538
   A14        2.07312  -0.00214   0.00000  -0.00983  -0.00982   2.06330
   A15        2.11047   0.00044   0.00000   0.00403   0.00404   2.11451
   A16        2.09532   0.00265   0.00000   0.01105   0.01104   2.10636
   A17        2.09540  -0.00183   0.00000  -0.00827  -0.00827   2.08713
   A18        2.09246  -0.00081   0.00000  -0.00278  -0.00278   2.08969
   A19        2.12276  -0.00072   0.00000  -0.00352  -0.00330   2.11946
   A20        2.04839   0.00027   0.00000   0.00281   0.00238   2.05076
   A21        2.11204   0.00045   0.00000   0.00071   0.00092   2.11296
   A22        2.05014   0.01750   0.00000   0.06162   0.06204   2.11218
   A23        2.11983  -0.02535   0.00000  -0.09095  -0.09116   2.02867
   A24        2.11321   0.00785   0.00000   0.02933   0.02912   2.14233
   A25        2.11741   0.00122   0.00000   0.00621   0.00607   2.12347
   A26        2.06934   0.00236   0.00000   0.00716   0.00721   2.07655
   A27        2.09644  -0.00358   0.00000  -0.01337  -0.01328   2.08316
   A28        2.11651  -0.01151   0.00000  -0.04215  -0.04186   2.07464
   A29        2.08187   0.01033   0.00000   0.03635   0.03621   2.11808
   A30        2.08481   0.00118   0.00000   0.00579   0.00565   2.09046
   A31        2.08154   0.00075   0.00000   0.00232   0.00236   2.08390
   A32        2.07871  -0.00133   0.00000  -0.00629  -0.00632   2.07239
   A33        2.12294   0.00058   0.00000   0.00398   0.00395   2.12690
   A34        2.10733   0.00087   0.00000   0.00514   0.00512   2.11244
   A35        2.07653   0.00944   0.00000   0.05054   0.05055   2.12708
   A36        2.09933  -0.01032   0.00000  -0.05568  -0.05567   2.04366
   A37        2.11935   0.00499   0.00000   0.01714   0.01716   2.13652
   A38        2.08232  -0.00262   0.00000  -0.00904  -0.00905   2.07327
   A39        2.08151  -0.00236   0.00000  -0.00810  -0.00811   2.07340
   A40        2.07691  -0.00421   0.00000  -0.01701  -0.01702   2.05989
   A41        2.10155   0.00234   0.00000   0.00975   0.00975   2.11130
   A42        2.10473   0.00188   0.00000   0.00727   0.00727   2.11200
   A43        1.91063   0.02160   0.00000   0.11610   0.11610   2.02674
    D1        0.00000   0.00000   0.00000   0.00001   0.00001   0.00001
    D2       -3.14158   0.00000   0.00000  -0.00002  -0.00002   3.14159
    D3        3.14159   0.00000   0.00000   0.00002   0.00002  -3.14158
    D4        0.00001   0.00000   0.00000  -0.00001  -0.00001   0.00000
    D5       -0.00001   0.00000   0.00000   0.00002   0.00002   0.00001
    D6       -3.14159   0.00000   0.00000   0.00000   0.00000  -3.14159
    D7        3.14159   0.00000   0.00000   0.00001   0.00001  -3.14158
    D8        0.00001   0.00000   0.00000  -0.00001  -0.00001   0.00000
    D9        0.00001   0.00000   0.00000  -0.00008  -0.00008  -0.00006
   D10       -3.14154  -0.00001   0.00000  -0.00013  -0.00013   3.14151
   D11        3.14159   0.00000   0.00000  -0.00004  -0.00004   3.14155
   D12        0.00004   0.00000   0.00000  -0.00009  -0.00009  -0.00006
   D13       -0.00002   0.00001   0.00000   0.00011   0.00010   0.00008
   D14        3.14154   0.00001   0.00000   0.00014   0.00013  -3.14152
   D15        3.14153   0.00001   0.00000   0.00016   0.00016  -3.14149
   D16       -0.00010   0.00001   0.00000   0.00019   0.00019   0.00009
   D17       -3.14151  -0.00001   0.00000  -0.00014  -0.00014   3.14153
   D18       -0.00088   0.00003   0.00000   0.00055   0.00054  -0.00035
   D19        0.00012  -0.00001   0.00000  -0.00019  -0.00019  -0.00008
   D20        3.14075   0.00003   0.00000   0.00050   0.00048   3.14123
   D21        0.00001   0.00000   0.00000  -0.00007  -0.00007  -0.00006
   D22        3.14159   0.00000   0.00000  -0.00003  -0.00003   3.14156
   D23       -3.14154  -0.00001   0.00000  -0.00010  -0.00010   3.14155
   D24        0.00003   0.00000   0.00000  -0.00006  -0.00006  -0.00003
   D25        3.14080   0.00002   0.00000   0.00059   0.00059   3.14139
   D26        0.00007  -0.00001   0.00000  -0.00017  -0.00017  -0.00011
   D27       -0.00083   0.00002   0.00000   0.00062   0.00062  -0.00021
   D28       -3.14156   0.00000   0.00000  -0.00014  -0.00014   3.14148
   D29        0.00000   0.00000   0.00000   0.00001   0.00001   0.00001
   D30        3.14159   0.00000   0.00000   0.00003   0.00003  -3.14157
   D31       -3.14158   0.00000   0.00000  -0.00003  -0.00003   3.14158
   D32        0.00001   0.00000   0.00000  -0.00001  -0.00001   0.00000
   D33       -0.00007   0.00001   0.00000   0.00017   0.00018   0.00011
   D34        3.14156   0.00001   0.00000   0.00012   0.00012  -3.14150
   D35       -3.14081  -0.00002   0.00000  -0.00058  -0.00058  -3.14138
   D36        0.00083  -0.00002   0.00000  -0.00063  -0.00063   0.00020
   D37       -0.00012   0.00001   0.00000   0.00019   0.00020   0.00008
   D38        3.14151   0.00001   0.00000   0.00019   0.00020  -3.14147
   D39       -3.14075  -0.00001   0.00000  -0.00043  -0.00045  -3.14121
   D40        0.00088  -0.00001   0.00000  -0.00042  -0.00045   0.00043
   D41       -3.14095  -0.00002   0.00000  -0.00042  -0.00040  -3.14135
   D42       -0.00035   0.00002   0.00000   0.00032   0.00030  -0.00005
   D43        0.00010  -0.00001   0.00000  -0.00019  -0.00020  -0.00010
   D44       -3.14154  -0.00001   0.00000  -0.00020  -0.00020   3.14145
   D45       -3.14154  -0.00001   0.00000  -0.00014  -0.00014   3.14151
   D46        0.00002  -0.00001   0.00000  -0.00014  -0.00015  -0.00013
   D47        3.14154   0.00000   0.00000   0.00013   0.00013  -3.14151
   D48       -0.00004   0.00000   0.00000   0.00008   0.00008   0.00005
   D49       -0.00001   0.00000   0.00000   0.00008   0.00008   0.00007
   D50       -3.14159   0.00000   0.00000   0.00003   0.00003  -3.14156
   D51        3.14154   0.00001   0.00000   0.00012   0.00012  -3.14152
   D52       -0.00004   0.00001   0.00000   0.00011   0.00011   0.00008
   D53       -0.00001   0.00000   0.00000   0.00012   0.00013   0.00012
   D54       -3.14159   0.00001   0.00000   0.00012   0.00012  -3.14147
   D55        0.00000   0.00000   0.00000   0.00001   0.00002   0.00001
   D56       -3.14159   0.00000   0.00000  -0.00003  -0.00003   3.14157
   D57        3.14158   0.00000   0.00000   0.00006   0.00006  -3.14155
   D58       -0.00001   0.00000   0.00000   0.00001   0.00001   0.00001
   D59        0.00000   0.00000   0.00000  -0.00004  -0.00004  -0.00004
   D60       -3.14159   0.00000   0.00000  -0.00003  -0.00003   3.14157
   D61        3.14158   0.00000   0.00000  -0.00003  -0.00003   3.14155
   D62       -0.00001   0.00000   0.00000  -0.00002  -0.00002  -0.00003
   D63        0.00001   0.00000   0.00000  -0.00003  -0.00004  -0.00003
   D64       -3.14159   0.00000   0.00000  -0.00004  -0.00005   3.14155
   D65       -3.14159   0.00000   0.00000   0.00001   0.00001  -3.14158
   D66       -0.00001   0.00000   0.00000   0.00000   0.00000  -0.00001
         Item               Value     Threshold  Converged?
 Maximum Force            0.098917     0.000450     NO 
 RMS     Force            0.010672     0.000300     NO 
 Maximum Displacement     0.334162     0.001800     NO 
 RMS     Displacement     0.042585     0.001200     NO 
 Predicted change in Energy=-1.385784D-02
 GradGradGradGradGradGradGradGradGradGradGradGradGradGradGradGradGradGrad

                          Input orientation:                          
 ---------------------------------------------------------------------
 Center     Atomic      Atomic             Coordinates (Angstroms)
 Number     Number       Type             X           Y           Z
 ---------------------------------------------------------------------
      1          6           0       -5.096362    0.067551   -0.000018
      2          6           0       -4.040070    0.989986    0.000073
      3          6           0       -2.714128    0.540110    0.000033
      4          6           0       -2.420915   -0.837330   -0.000022
      5          6           0       -3.481440   -1.744522   -0.000139
      6          6           0       -4.811037   -1.291203   -0.000132
      7          1           0       -6.123612    0.413174   -0.000003
      8          1           0       -4.240919    2.054812    0.000157
      9          1           0       -3.250440   -2.801685   -0.000215
     10          1           0       -5.623985   -2.009002   -0.000205
     11          6           0       -1.024673   -1.326563    0.000029
     12          8           0       -0.764319   -2.538313    0.000198
     13          6           0       -1.629672    1.504159    0.000029
     14          6           0        0.052359   -0.315527    0.000003
     15          6           0       -0.229486    1.066852    0.000063
     16          6           0        1.386583   -0.744741   -0.000067
     17          6           0        0.826489    1.994488    0.000210
     18          6           0        2.416357    0.207796    0.000004
     19          1           0        1.591035   -1.805795   -0.000146
     20          6           0        2.167955    1.567205    0.000157
     21          1           0        0.648579    3.066207    0.000373
     22          1           0        2.979975    2.282188    0.000252
     23         35           0        4.229162   -0.396708   -0.000050
     24          8           0       -1.968631    2.734590   -0.000333
     25          1           0       -1.241376    3.378582   -0.000548
 ---------------------------------------------------------------------
                    Distance matrix (angstroms):
                    1          2          3          4          5
     1  C    0.000000
     2  C    1.402368   0.000000
     3  C    2.428652   1.400183   0.000000
     4  C    2.824327   2.441464   1.408302   0.000000
     5  C    2.427259   2.790986   2.410044   1.395604   0.000000
     6  C    1.388388   2.407947   2.784013   2.432834   1.404752
     7  H    1.083835   2.161911   3.411846   3.908161   3.411265
     8  H    2.163559   1.083602   2.150677   3.417147   3.874499
     9  H    3.411736   3.873020   3.384556   2.132323   1.082106
    10  H    2.142536   3.391565   3.868493   3.410641   2.158808
    11  C    4.303744   3.802503   2.517683   1.479474   2.492066
    12  O    5.055405   4.814503   3.643960   2.374374   2.830698
    13  C    3.752569   2.464628   1.451011   2.471565   3.739381
    14  C    5.162952   4.295619   2.895784   2.527719   3.811792
    15  C    4.968409   3.811360   2.539863   2.903149   4.298724
    16  C    6.533635   5.697179   4.297287   3.808624   4.969628
    17  C    6.228423   4.969147   3.827687   4.308692   5.704248
    18  C    7.514028   6.503636   5.141237   4.948888   6.212532
    19  H    6.944833   6.286950   4.902825   4.127186   5.072845
    20  C    7.417497   6.234802   4.988953   5.180687   6.548526
    21  H    6.480454   5.127780   4.205825   4.965822   6.340360
    22  H    8.374475   7.137984   5.954632   6.237067   7.613427
    23  Br   9.337073   8.384696   7.006205   6.664658   7.827514
    24  O    4.110450   2.708229   2.317652   3.600441   4.727689
    25  H    5.081716   3.679413   3.197800   4.377810   5.591429
                    6          7          8          9         10
     6  C    0.000000
     7  H    2.151221   0.000000
     8  H    3.394237   2.497901   0.000000
     9  H    2.171870   4.311663   4.956471   0.000000
    10  H    1.084491   2.473169   4.292721   2.502412   0.000000
    11  C    3.786529   5.387566   4.666684   2.670210   4.649667
    12  O    4.234526   6.118276   5.760515   2.500032   4.888408
    13  C    4.234988   4.624472   2.668675   4.600780   5.319477
    14  C    4.960299   6.218812   4.904155   4.133940   5.923575
    15  C    5.152769   5.930263   4.131302   4.908334   6.209791
    16  C    6.221665   7.598934   6.285401   5.072770   7.123653
    17  C    6.525141   7.127725   5.067767   6.294809   7.591874
    18  C    7.381207   8.542439   6.908748   6.416351   8.340342
    19  H    6.422720   8.027428   6.993995   4.942840   7.217881
    20  C    7.541672   8.371492   6.427396   6.960330   8.573423
    21  H    6.985300   7.273318   4.993006   7.045175   8.068631
    22  H    8.571405   9.293466   7.224472   8.041382   9.614699
    23  Br   9.084344  10.384404   8.817722   7.856739   9.984188
    24  O    4.928111   4.759500   2.371790   5.682726   5.988596
    25  H    5.877871   5.712257   3.278662   6.498618   6.945022
                   11         12         13         14         15
    11  C    0.000000
    12  O    1.239403   0.000000
    13  C    2.894652   4.134055   0.000000
    14  C    1.477225   2.368067   2.478000   0.000000
    15  C    2.522055   3.644621   1.466888   1.410818   0.000000
    16  C    2.480458   2.800585   3.762359   1.401563   2.427663
    17  C    3.802129   4.803848   2.504626   2.436277   1.405557
    18  C    3.767618   4.202120   4.248637   2.421230   2.781809
    19  H    2.659246   2.466632   4.618306   2.142060   3.400940
    20  C    4.308917   5.045146   3.798151   2.832035   2.449096
    21  H    4.700660   5.779872   2.762322   3.433890   2.183670
    22  H    5.390759   6.103848   4.674845   3.913956   3.431862
    23  Br   5.335486   5.433352   6.159483   4.177592   4.692712
    24  O    4.169416   5.408685   1.276266   3.658909   2.409560
    25  H    4.710133   5.936095   1.914220   3.914101   2.523493
                   16         17         18         19         20
    16  C    0.000000
    17  C    2.795905   0.000000
    18  C    1.402769   2.391642   0.000000
    19  H    1.080572   3.876426   2.176167   0.000000
    20  C    2.440417   1.407871   1.381918   3.421982   0.000000
    21  H    3.881749   1.086385   3.360886   4.962320   2.134364
    22  H    3.420701   2.172619   2.149597   4.317494   1.081932
    23  Br   2.863806   4.158847   1.910938   2.990859   2.847021
    24  O    4.833550   2.891444   5.060911   5.769430   4.298155
    25  H    4.889577   2.488329   4.840754   5.907649   3.860651
                   21         22         23         24         25
    21  H    0.000000
    22  H    2.459693   0.000000
    23  Br   4.981200   2.955834   0.000000
    24  O    2.638136   4.969242   6.943895   0.000000
    25  H    1.915597   4.361408   6.646774   0.971403   0.000000
 Stoichiometry    C14H8BrO2(2)
 Framework group  C1[X(C14H8BrO2)]
 Deg. of freedom    69
 Full point group                 C1      NOp   1
 Largest Abelian subgroup         C1      NOp   1
 Largest concise Abelian subgroup C1      NOp   1
                         Standard orientation:                         
 ---------------------------------------------------------------------
 Center     Atomic      Atomic             Coordinates (Angstroms)
 Number     Number       Type             X           Y           Z
 ---------------------------------------------------------------------
      1          6           0        5.091708    0.027245    0.000005
      2          6           0        4.039774    0.954646   -0.000086
      3          6           0        2.711727    0.511022   -0.000046
      4          6           0        2.412028   -0.865021    0.000009
      5          6           0        3.468267   -1.777200    0.000127
      6          6           0        4.799985   -1.330149    0.000119
      7          1           0        6.120576    0.368024   -0.000010
      8          1           0        4.245637    2.018514   -0.000170
      9          1           0        3.232289   -2.833262    0.000202
     10          1           0        5.609543   -2.051771    0.000193
     11          6           0        1.013496   -1.347671   -0.000042
     12          8           0        0.747436   -2.558181   -0.000210
     13          6           0        1.631825    1.480169   -0.000042
     14          6           0       -0.058760   -0.331571   -0.000016
     15          6           0        0.229594    1.049464   -0.000076
     16          6           0       -1.394992   -0.754495    0.000054
     17          6           0       -0.821998    1.982065   -0.000223
     18          6           0       -2.420267    0.202882   -0.000017
     19          1           0       -1.604440   -1.814574    0.000133
     20          6           0       -2.165463    1.561106   -0.000170
     21          1           0       -0.639042    3.052933   -0.000386
     22          1           0       -2.974105    2.279907   -0.000265
     23         35           0       -4.235899   -0.393074    0.000038
     24          8           0        1.976577    2.708990    0.000320
     25          1           0        1.252364    3.356401    0.000535
 ---------------------------------------------------------------------
 Rotational constants (GHZ):      0.9944869      0.1755756      0.1492293
 Standard basis: 6-311G(d) (5D, 7F)
 There are   375 symmetry adapted cartesian basis functions of A   symmetry.
 There are   356 symmetry adapted basis functions of A   symmetry.
   356 basis functions,   642 primitive gaussians,   375 cartesian basis functions
    72 alpha electrons       71 beta electrons
       nuclear repulsion energy      1391.6610971710 Hartrees.
 NAtoms=   25 NActive=   25 NUniq=   25 SFac= 1.00D+00 NAtFMM=   60 NAOKFM=F Big=F
 Integral buffers will be    262144 words long.
 Raffenetti 2 integral format.
 Two-electron integral symmetry is turned on.
 Nuclear repulsion after empirical dispersion term =     1391.5978330725 Hartrees.
 ------------------------------------------------------------------------------
 Polarizable Continuum Model (PCM)
 =================================
 Model                : PCM (using non-symmetric T matrix).
 Atomic radii         : UFF (Universal Force Field).
 Polarization charges : Total charges.
 Charge compensation  : None.
 Solution method      : On-the-fly selection.
 Cavity type          : Scaled VdW (van der Waals Surface) (Alpha=1.100).
 Cavity algorithm     : GePol (No added spheres)
                        Default sphere list used, NSphG=   25.
                        Lebedev-Laikov grids with approx.  5.0 points / Ang**2.
                        Smoothing algorithm: Karplus/York (Gamma=1.0000).
                        Polarization charges: spherical gaussians, with
                                              point-specific exponents (IZeta= 3).
                        Self-potential: point-specific (ISelfS= 7).
                        Self-field    : sphere-specific E.n sum rule (ISelfD= 2).
 1st derivatives      : Analytical E(r).r(x)/FMM algorithm (CHGder, D1EAlg=3).
                        Cavity 1st derivative terms included.
 Solvent              : Acetonitrile, Eps=  35.688000 Eps(inf)=   1.806874
 ------------------------------------------------------------------------------
 One-electron integrals computed using PRISM.
 NBasis=   356 RedAO= T EigKep=  9.05D-05  NBF=   356
 NBsUse=   356 1.00D-06 EigRej= -1.00D+00 NBFU=   356
 Initial guess from the checkpoint file:  "C:\Users\Shengfu Liao\Desktop\suppliment.chk"
 B after Tr=     0.000000    0.000000    0.000000
         Rot=    0.999999    0.000003    0.000002    0.001419 Ang=   0.16 deg.
 Initial guess <Sx>= 0.0000 <Sy>= 0.0000 <Sz>= 0.5000 <S**2>= 0.7667 S= 0.5083
 ExpMin= 1.03D-01 ExpMax= 4.40D+05 ExpMxC= 1.51D+04 IAcc=2 IRadAn=         4 AccDes= 0.00D+00
 Harris functional with IExCor=  402 and IRadAn=       4 diagonalized for initial guess.
 HarFok:  IExCor=  402 AccDes= 0.00D+00 IRadAn=         4 IDoV= 1 UseB2=F ITyADJ=14
 ICtDFT=  3500011 ScaDFX=  1.000000  1.000000  1.000000  1.000000
 FoFCou: FMM=F IPFlag=           0 FMFlag=      100000 FMFlg1=           0
         NFxFlg=           0 DoJE=T BraDBF=F KetDBF=T FulRan=T
         wScrn=  0.000000 ICntrl=     500 IOpCl=  0 I1Cent=   200000004 NGrid=           0
         NMat0=    1 NMatS0=      1 NMatT0=    0 NMatD0=    1 NMtDS0=    0 NMtDT0=    0
 Petite list used in FoFCou.
 Requested convergence on RMS density matrix=1.00D-08 within 128 cycles.
 Requested convergence on MAX density matrix=1.00D-06.
 Requested convergence on             energy=1.00D-06.
 No special actions if energy rises.
 Inv3:  Mode=1 IEnd=    14493612.
 Iteration    1 A*A^-1 deviation from unit magnitude is 2.78D-15 for    203.
 Iteration    1 A*A^-1 deviation from orthogonality  is 2.58D-15 for   1480   1275.
 Iteration    1 A^-1*A deviation from unit magnitude is 3.22D-15 for   1237.
 Iteration    1 A^-1*A deviation from orthogonality  is 1.57D-12 for    907    873.
 Error on total polarization charges =  0.01446
 SCF Done:  E(UB3LYP) =  -3263.11538608     A.U. after   15 cycles
            NFock= 15  Conv=0.74D-08     -V/T= 2.0017
 <Sx>= 0.0000 <Sy>= 0.0000 <Sz>= 0.5000 <S**2>= 0.7698 S= 0.5099
 <L.S>= 0.000000000000E+00
 Annihilation of the first spin contaminant:
 S**2 before annihilation     0.7698,   after     0.7503
 DoSCS=F DFT=T ScalE2(SS,OS)=  1.000000  1.000000
 ExpMin= 1.03D-01 ExpMax= 4.40D+05 ExpMxC= 1.51D+04 IAcc=3 IRadAn=         5 AccDes= 0.00D+00
 HarFok:  IExCor=  205 AccDes= 0.00D+00 IRadAn=         5 IDoV=-2 UseB2=F ITyADJ=14
 ICtDFT= 12500011 ScaDFX=  1.000000  1.000000  1.000000  1.000000
 Range of M.O.s used for correlation:    31   356
 NBasis=   356 NAE=    72 NBE=    71 NFC=    30 NFV=     0
 NROrb=    326 NOA=    42 NOB=    41 NVA=   284 NVB=   285

 **** Warning!!: The largest alpha MO coefficient is  0.21897122D+02


 **** Warning!!: The smallest alpha delta epsilon is  0.96732200D-01


 **** Warning!!: The largest beta MO coefficient is  0.21960462D+02

 Ignoring spin specification with unrestricted ground state.
 NEqPCM:  Using equilibrium solvation (IEInf=0, Eps=  35.6880, EpsInf=   1.8069)
 Orbital symmetries:
 Alpha Orbitals:
       Occupied  (A) (A) (A) (A) (A) (A) (A) (A) (A) (A) (A) (A)
                 (A) (A) (A) (A) (A) (A) (A) (A) (A) (A) (A) (A)
                 (A) (A) (A) (A) (A) (A) (A) (A) (A) (A) (A) (A)
                 (A) (A) (A) (A) (A) (A) (A) (A) (A) (A) (A) (A)
                 (A) (A) (A) (A) (A) (A) (A) (A) (A) (A) (A) (A)
                 (A) (A) (A) (A) (A) (A) (A) (A) (A) (A) (A) (A)
       Virtual   (A) (A) (A) (A) (A) (A) (A) (A) (A) (A) (A) (A)
                 (A) (A) (A) (A) (A) (A) (A) (A) (A) (A) (A) (A)
                 (A) (A) (A) (A) (A) (A) (A) (A) (A) (A) (A) (A)
                 (A) (A) (A) (A) (A) (A) (A) (A) (A) (A) (A) (A)
                 (A) (A) (A) (A) (A) (A) (A) (A) (A) (A) (A) (A)
                 (A) (A) (A) (A) (A) (A) (A) (A) (A) (A) (A) (A)
                 (A) (A) (A) (A) (A) (A) (A) (A) (A) (A) (A) (A)
                 (A) (A) (A) (A) (A) (A) (A) (A) (A) (A) (A) (A)
                 (A) (A) (A) (A) (A) (A) (A) (A) (A) (A) (A) (A)
                 (A) (A) (A) (A) (A) (A) (A) (A) (A) (A) (A) (A)
                 (A) (A) (A) (A) (A) (A) (A) (A) (A) (A) (A) (A)
                 (A) (A) (A) (A) (A) (A) (A) (A) (A) (A) (A) (A)
                 (A) (A) (A) (A) (A) (A) (A) (A) (A) (A) (A) (A)
                 (A) (A) (A) (A) (A) (A) (A) (A) (A) (A) (A) (A)
                 (A) (A) (A) (A) (A) (A) (A) (A) (A) (A) (A) (A)
                 (A) (A) (A) (A) (A) (A) (A) (A) (A) (A) (A) (A)
                 (A) (A) (A) (A) (A) (A) (A) (A) (A) (A) (A) (A)
                 (A) (A) (A) (A) (A) (A) (A) (A) (A) (A) (A) (A)
                 (A) (A) (A) (A) (A) (A) (A) (A) (A) (A) (A) (A)
                 (A) (A) (A) (A) (A) (A) (A) (A) (A) (A) (A) (A)
                 (A) (A) (A) (A) (A) (A) (A) (A) (A) (A) (A) (A)
                 (A) (A) (A) (A) (A) (A) (A) (A) (A) (A) (A) (A)
                 (A) (A) (A) (A) (A) (A) (A) (A) (A) (A) (A) (A)
                 (A) (A) (A) (A) (A) (A) (A) (A)
 Beta  Orbitals:
       Occupied  (A) (A) (A) (A) (A) (A) (A) (A) (A) (A) (A) (A)
                 (A) (A) (A) (A) (A) (A) (A) (A) (A) (A) (A) (A)
                 (A) (A) (A) (A) (A) (A) (A) (A) (A) (A) (A) (A)
                 (A) (A) (A) (A) (A) (A) (A) (A) (A) (A) (A) (A)
                 (A) (A) (A) (A) (A) (A) (A) (A) (A) (A) (A) (A)
                 (A) (A) (A) (A) (A) (A) (A) (A) (A) (A) (A)
       Virtual   (A) (A) (A) (A) (A) (A) (A) (A) (A) (A) (A) (A)
                 (A) (A) (A) (A) (A) (A) (A) (A) (A) (A) (A) (A)
                 (A) (A) (A) (A) (A) (A) (A) (A) (A) (A) (A) (A)
                 (A) (A) (A) (A) (A) (A) (A) (A) (A) (A) (A) (A)
                 (A) (A) (A) (A) (A) (A) (A) (A) (A) (A) (A) (A)
                 (A) (A) (A) (A) (A) (A) (A) (A) (A) (A) (A) (A)
                 (A) (A) (A) (A) (A) (A) (A) (A) (A) (A) (A) (A)
                 (A) (A) (A) (A) (A) (A) (A) (A) (A) (A) (A) (A)
                 (A) (A) (A) (A) (A) (A) (A) (A) (A) (A) (A) (A)
                 (A) (A) (A) (A) (A) (A) (A) (A) (A) (A) (A) (A)
                 (A) (A) (A) (A) (A) (A) (A) (A) (A) (A) (A) (A)
                 (A) (A) (A) (A) (A) (A) (A) (A) (A) (A) (A) (A)
                 (A) (A) (A) (A) (A) (A) (A) (A) (A) (A) (A) (A)
                 (A) (A) (A) (A) (A) (A) (A) (A) (A) (A) (A) (A)
                 (A) (A) (A) (A) (A) (A) (A) (A) (A) (A) (A) (A)
                 (A) (A) (A) (A) (A) (A) (A) (A) (A) (A) (A) (A)
                 (A) (A) (A) (A) (A) (A) (A) (A) (A) (A) (A) (A)
                 (A) (A) (A) (A) (A) (A) (A) (A) (A) (A) (A) (A)
                 (A) (A) (A) (A) (A) (A) (A) (A) (A) (A) (A) (A)
                 (A) (A) (A) (A) (A) (A) (A) (A) (A) (A) (A) (A)
                 (A) (A) (A) (A) (A) (A) (A) (A) (A) (A) (A) (A)
                 (A) (A) (A) (A) (A) (A) (A) (A) (A) (A) (A) (A)
                 (A) (A) (A) (A) (A) (A) (A) (A) (A) (A) (A) (A)
                 (A) (A) (A) (A) (A) (A) (A) (A) (A)
 Generating guess from densities on rwf.
 Convergence on wavefunction:    0.000001000000000
 Iteration     1 Dimension    10 NMult     0 NNew     10
 CISAX will form    10 AO SS matrices at one time.
 Iteration     2 Dimension    20 NMult    10 NNew     10
 Iteration     3 Dimension    30 NMult    20 NNew     10
 Iteration     4 Dimension    40 NMult    30 NNew     10
 Iteration     5 Dimension    50 NMult    40 NNew     10
 Iteration     6 Dimension    60 NMult    50 NNew     10
 Iteration     7 Dimension    70 NMult    60 NNew     10
 Iteration     8 Dimension    80 NMult    70 NNew     10
 Iteration     9 Dimension    90 NMult    80 NNew     10
 Iteration    10 Dimension    98 NMult    90 NNew      8
 Iteration    11 Dimension   104 NMult    98 NNew      6
 Iteration    12 Dimension   110 NMult   104 NNew      6
 Iteration    13 Dimension   114 NMult   110 NNew      4
 Iteration    14 Dimension   118 NMult   114 NNew      4
 ***********************************************************************
 Excited states from <AA,BB:AA,BB> singles matrix:
 ***********************************************************************
 
 ExtSpn:  IState=     1 X2= 1.009 Y2= 0.009 X2-Y2-1=-1.89D-15
          S2Grnd=  0.770 Ra=  0.007 Rb=  0.007 T=  0.002 S2Ext=  0.016 S2=  0.786
 ExtSpn:  IState=     2 X2= 1.002 Y2= 0.002 X2-Y2-1= 1.11D-15
          S2Grnd=  0.770 Ra=  0.017 Rb=  0.188 T=  0.114 S2Ext=  0.320 S2=  1.090
 ExtSpn:  IState=     3 X2= 1.011 Y2= 0.011 X2-Y2-1= 8.66D-15
          S2Grnd=  0.770 Ra=  0.043 Rb=  0.034 T=  0.069 S2Ext=  0.146 S2=  0.916
 ExtSpn:  IState=     4 X2= 1.006 Y2= 0.006 X2-Y2-1= 9.77D-15
          S2Grnd=  0.770 Ra=  0.056 Rb=  0.054 T=  0.100 S2Ext=  0.210 S2=  0.980
 ExtSpn:  IState=     5 X2= 1.008 Y2= 0.008 X2-Y2-1= 2.66D-15
          S2Grnd=  0.770 Ra=  0.052 Rb=  0.081 T=  0.097 S2Ext=  0.229 S2=  0.999
 Ground to excited state transition densities written to RWF  633
 Ground to excited state transition electric dipole moments (Au):
       state          X           Y           Z        Dip. S.      Osc.
         1         0.1473      0.8508      0.0000      0.7455      0.0314
         2        -0.0002      0.0000      0.0004      0.0000      0.0000
         3         1.1744     -0.2108      0.0000      1.4236      0.0987
         4        -0.3810     -0.1216      0.0000      0.1599      0.0120
         5        -1.5023      0.5302      0.0000      2.5380      0.1945
 Ground to excited state transition velocity dipole moments (Au):
       state          X           Y           Z        Dip. S.      Osc.
         1        -0.0119     -0.0657      0.0000      0.0045      0.0471
         2         0.0000      0.0000     -0.0002      0.0000      0.0000
         3        -0.1242      0.0218      0.0000      0.0159      0.1020
         4         0.0429      0.0123      0.0000      0.0020      0.0118
         5         0.1714     -0.0607      0.0000      0.0331      0.1917
 Ground to excited state transition magnetic dipole moments (Au):
       state          X           Y           Z
         1         0.0000      0.0000     -0.0967
         2        -0.0789     -0.3649     -0.0001
         3         0.0000      0.0000     -0.0272
         4         0.0000      0.0000     -0.3552
         5         0.0000     -0.0001     -1.3177
 Ground to excited state transition velocity quadrupole moments (Au):
       state          XX          YY          ZZ          XY          XZ          YZ
         1        -0.1665     -0.0129      0.0001     -0.1466      0.0000      0.0000
         2         0.0001      0.0000      0.0000      0.0000      0.0102     -0.0010
         3        -0.5628      0.0225      0.0032     -0.0348      0.0000      0.0000
         4         0.3799     -0.0043      0.0049     -0.0968      0.0000      0.0000
         5         0.0617      0.1730     -0.0143     -0.3191      0.0000      0.0000
 <0|del|b> * <b|rxdel|0> + <0|del|b> * <b|delr+rdel|0>
 Rotatory Strengths (R) in cgs (10**-40 erg-esu-cm/Gauss)
       state          XX          YY          ZZ    R(velocity)    E-M Angle
         1        -0.0047      0.0007     -0.0018     -0.0020       90.00
         2         0.0026     -0.0049     -0.0024     -0.0015       90.00
         3         0.0020      0.0024     -0.0009      0.0012       90.00
         4        -0.0058     -0.0002      0.0018     -0.0014       90.00
         5         0.0144      0.0100      0.0144      0.0129       90.00
 1/2[<0|r|b>*<b|rxdel|0> + (<0|rxdel|b>*<b|r|0>)*]
 Rotatory Strengths (R) in cgs (10**-40 erg-esu-cm/Gauss)
       state          XX          YY          ZZ     R(length)
         1         0.0010     -0.0062     -0.0004     -0.0019
         2        -0.0097      0.0046      0.0000     -0.0017
         3        -0.0003      0.0034      0.0004      0.0012
         4         0.0048     -0.0041     -0.0025     -0.0006
         5         0.0152      0.0375     -0.0102      0.0142
  1/2[<0|del|b>*<b|r|0> + (<0|r|b>*<b|del|0>)*] (Au)
       state          X           Y           Z        Dip. S.   Osc.(frdel)
         1        -0.0017     -0.0559      0.0000      0.0577      0.0385
         2         0.0000      0.0000      0.0000      0.0000      0.0000
         3        -0.1458     -0.0046      0.0000      0.1504      0.1003
         4        -0.0163     -0.0015      0.0000      0.0178      0.0119
         5        -0.2575     -0.0322      0.0000      0.2896      0.1931

 Excitation energies and oscillator strengths:
 
 Excited State   1:  2.035-A      1.7188 eV  721.34 nm  f=0.0314  <S**2>=0.786
     72A -> 73A        0.98508
 This state for optimization and/or second-order correction.
 Total Energy, E(TD-HF/TD-KS) =  -3263.05222086    
 Copying the excited state density for this state as the 1-particle RhoCI density.
 
 Excited State   2:  2.315-A      2.5472 eV  486.74 nm  f=0.0000  <S**2>=1.090
     70A -> 73A       -0.12523
     70B -> 72B        0.94061
     70B -> 73B        0.27890
     70B -> 79B       -0.12251
 
 Excited State   3:  2.160-A      2.8285 eV  438.34 nm  f=0.0987  <S**2>=0.916
     72A -> 74A        0.80817
     72A -> 75A        0.16099
     71B -> 72B        0.47930
 
 Excited State   4:  2.218-A      3.0555 eV  405.77 nm  f=0.0120  <S**2>=0.980
     68A -> 73A       -0.12512
     71A -> 73A        0.12240
     72A -> 74A       -0.15999
     72A -> 75A        0.77859
     68B -> 72B       -0.12032
     68B -> 73B        0.15979
     69B -> 72B        0.47182
     71B -> 72B       -0.15877
 
 Excited State   5:  2.235-A      3.1277 eV  396.41 nm  f=0.1945  <S**2>=0.999
     69A -> 73A       -0.15442
     72A -> 74A       -0.49911
     72A -> 75A        0.22978
     67B -> 72B       -0.12684
     69B -> 72B       -0.31777
     69B -> 73B       -0.15105
     69B -> 75B       -0.10509
     71B -> 72B        0.68715
 SavETr:  write IOETrn=   770 NScale= 10 NData=  16 NLR=1 NState=    5 LETran=      96.
          IDoAtm=1111111111111111111111111
 NEqPCM:  Using equilibrium solvation (IEInf=0, Eps=  35.6880, EpsInf=   1.8069)
          Differentiating once with respect to electric field.
                with respect to dipole field.
          Differentiating once with respect to nuclear coordinates.
          There are     1 degrees of freedom in the 1st order CPHF.  IDoFFX=0 NUNeed=     1.
 LinEq1:  Iter=  0 NonCon=     1 RMS=2.69D-03 Max=1.91D-01 NDo=     1
 AX will form     1 AO Fock derivatives at one time.
 LinEq1:  Iter=  1 NonCon=     1 RMS=1.80D-03 Max=1.50D-01 NDo=     1
 LinEq1:  Iter=  2 NonCon=     1 RMS=1.00D-03 Max=6.59D-02 NDo=     1
 LinEq1:  Iter=  3 NonCon=     1 RMS=7.47D-04 Max=3.14D-02 NDo=     1
 LinEq1:  Iter=  4 NonCon=     1 RMS=5.81D-04 Max=2.50D-02 NDo=     1
 LinEq1:  Iter=  5 NonCon=     1 RMS=3.95D-04 Max=1.88D-02 NDo=     1
 LinEq1:  Iter=  6 NonCon=     1 RMS=3.03D-04 Max=1.59D-02 NDo=     1
 LinEq1:  Iter=  7 NonCon=     1 RMS=1.93D-04 Max=1.20D-02 NDo=     1
 LinEq1:  Iter=  8 NonCon=     1 RMS=1.51D-04 Max=1.14D-02 NDo=     1
 LinEq1:  Iter=  9 NonCon=     1 RMS=7.70D-05 Max=3.70D-03 NDo=     1
 LinEq1:  Iter= 10 NonCon=     1 RMS=4.80D-05 Max=2.73D-03 NDo=     1
 LinEq1:  Iter= 11 NonCon=     1 RMS=2.74D-05 Max=9.21D-04 NDo=     1
 LinEq1:  Iter= 12 NonCon=     1 RMS=1.43D-05 Max=5.51D-04 NDo=     1
 LinEq1:  Iter= 13 NonCon=     1 RMS=1.10D-05 Max=5.18D-04 NDo=     1
 LinEq1:  Iter= 14 NonCon=     1 RMS=7.28D-06 Max=3.26D-04 NDo=     1
 LinEq1:  Iter= 15 NonCon=     1 RMS=4.27D-06 Max=1.96D-04 NDo=     1
 LinEq1:  Iter= 16 NonCon=     1 RMS=2.68D-06 Max=1.27D-04 NDo=     1
 LinEq1:  Iter= 17 NonCon=     1 RMS=1.82D-06 Max=6.11D-05 NDo=     1
 LinEq1:  Iter= 18 NonCon=     1 RMS=9.17D-07 Max=3.48D-05 NDo=     1
 LinEq1:  Iter= 19 NonCon=     1 RMS=6.80D-07 Max=2.83D-05 NDo=     1
 LinEq1:  Iter= 20 NonCon=     1 RMS=4.20D-07 Max=2.42D-05 NDo=     1
 LinEq1:  Iter= 21 NonCon=     1 RMS=2.12D-07 Max=1.04D-05 NDo=     1
 LinEq1:  Iter= 22 NonCon=     1 RMS=1.35D-07 Max=5.50D-06 NDo=     1
 LinEq1:  Iter= 23 NonCon=     1 RMS=7.62D-08 Max=2.90D-06 NDo=     1
 LinEq1:  Iter= 24 NonCon=     1 RMS=4.74D-08 Max=1.50D-06 NDo=     1
 LinEq1:  Iter= 25 NonCon=     1 RMS=2.34D-08 Max=8.66D-07 NDo=     1
 LinEq1:  Iter= 26 NonCon=     1 RMS=1.61D-08 Max=5.74D-07 NDo=     1
 LinEq1:  Iter= 27 NonCon=     1 RMS=6.62D-09 Max=3.05D-07 NDo=     1
 LinEq1:  Iter= 28 NonCon=     1 RMS=2.75D-09 Max=8.51D-08 NDo=     1
 LinEq1:  Iter= 29 NonCon=     1 RMS=2.12D-09 Max=1.01D-07 NDo=     1
 LinEq1:  Iter= 30 NonCon=     1 RMS=7.96D-10 Max=2.48D-08 NDo=     1
 LinEq1:  Iter= 31 NonCon=     1 RMS=3.03D-10 Max=1.34D-08 NDo=     1
 LinEq1:  Iter= 32 NonCon=     1 RMS=1.92D-10 Max=7.45D-09 NDo=     1
 LinEq1:  Iter= 33 NonCon=     1 RMS=8.05D-11 Max=3.21D-09 NDo=     1
 LinEq1:  Iter= 34 NonCon=     0 RMS=2.63D-11 Max=7.70D-10 NDo=     1
 Linear equations converged to 1.000D-10 1.000D-09 after    34 iterations.
 End of Minotr F.D. properties file   721 does not exist.
 End of Minotr F.D. properties file   722 does not exist.
 End of Minotr F.D. properties file   788 does not exist.
 D1PCM: PCM CHGder 1st derivatives, ID1Alg=3 FixD1E=F DoIter=F DoCFld=F I1PDM=6.
 Calling FoFJK, ICntrl=  10005127 FMM=F ISym2X=0 I1Cent= 0 IOpClX= 1 NMat=1 NMatS=1 NMatT=0.
 ***** Axes restored to original set *****
 -------------------------------------------------------------------
 Center     Atomic                   Forces (Hartrees/Bohr)
 Number     Number              X              Y              Z
 -------------------------------------------------------------------
      1        6          -0.001668770   -0.004591287    0.000000095
      2        6           0.002081704    0.001825389   -0.000003372
      3        6          -0.003009207    0.013887892    0.000011154
      4        6           0.002430132   -0.009629472   -0.000002667
      5        6           0.002962700    0.000002472    0.000002797
      6        6          -0.001915775    0.003833740    0.000000537
      7        1           0.000500915    0.000278959    0.000000380
      8        1          -0.000219259   -0.001244799   -0.000000084
      9        1          -0.000452718   -0.000185468   -0.000000222
     10        1           0.000349785   -0.000626797   -0.000000430
     11        6          -0.001529925    0.019689968    0.000006901
     12        8           0.001921534   -0.011925488   -0.000004485
     13        6           0.021333307   -0.043920513   -0.000021697
     14        6          -0.002878232   -0.011519344   -0.000003142
     15        6          -0.005200684    0.017784288    0.000012628
     16        6          -0.002114597   -0.002236516    0.000001342
     17        6          -0.009397442    0.000459388   -0.000007204
     18        6          -0.000554001    0.006185773    0.000002209
     19        1           0.000249384    0.000353407   -0.000000370
     20        6           0.006132447   -0.004750489   -0.000000214
     21        1           0.000117437   -0.000952868    0.000001163
     22        1          -0.001097896    0.000417571   -0.000000009
     23       35           0.000584996   -0.001052373   -0.000000599
     24        8          -0.008959207    0.032159377    0.000000916
     25        1           0.000333372   -0.004242811    0.000004372
 -------------------------------------------------------------------
 Cartesian Forces:  Max     0.043920513 RMS     0.008245870

 GradGradGradGradGradGradGradGradGradGradGradGradGradGradGradGradGradGrad
 Berny optimization.
 Using GEDIIS/GDIIS optimizer.
 FormGI is forming the generalized inverse of G from B-inverse, IUseBI=4.
 Internal  Forces:  Max     0.029202634 RMS     0.003414366
 Search for a local minimum.
 Step number   2 out of a maximum of  146
 All quantities printed in internal units (Hartrees-Bohrs-Radians)
 Mixed Optimization -- RFO/linear search
 Update second derivatives using D2CorX and points    1    2
 DE= -1.52D-02 DEPred=-1.39D-02 R= 1.10D+00
 TightC=F SS=  1.41D+00  RLast= 2.55D-01 DXNew= 5.0454D-01 7.6359D-01
 Trust test= 1.10D+00 RLast= 2.55D-01 DXMaxT set to 5.05D-01
 ITU=  1  0
 Use linear search instead of GDIIS.
     Eigenvalues ---    0.00885   0.00896   0.01261   0.01537   0.01587
     Eigenvalues ---    0.01671   0.01729   0.01799   0.01861   0.02148
     Eigenvalues ---    0.02148   0.02160   0.02165   0.02169   0.02171
     Eigenvalues ---    0.02177   0.02184   0.02191   0.02194   0.02199
     Eigenvalues ---    0.02216   0.04043   0.15870   0.16000   0.16000
     Eigenvalues ---    0.16000   0.16000   0.16000   0.16000   0.17503
     Eigenvalues ---    0.17852   0.21974   0.22322   0.22534   0.22656
     Eigenvalues ---    0.23553   0.24549   0.24671   0.25000   0.25000
     Eigenvalues ---    0.25000   0.25000   0.26857   0.30567   0.32118
     Eigenvalues ---    0.33016   0.34334   0.35475   0.35479   0.35611
     Eigenvalues ---    0.35614   0.35663   0.35714   0.35750   0.39162
     Eigenvalues ---    0.41370   0.42255   0.42566   0.44787   0.45073
     Eigenvalues ---    0.45888   0.46095   0.46694   0.46875   0.47152
     Eigenvalues ---    0.48079   0.56182   0.79046   0.94749
 RFO step:  Lambda=-3.12939813D-03 EMin= 8.84973962D-03
 Quartic linear search produced a step of  0.24024.
 Iteration  1 RMS(Cart)=  0.01322080 RMS(Int)=  0.00016955
 Iteration  2 RMS(Cart)=  0.00030481 RMS(Int)=  0.00005299
 Iteration  3 RMS(Cart)=  0.00000002 RMS(Int)=  0.00005299
 Variable       Old X    -DE/DX   Delta X   Delta X   Delta X     New X
                                 (Linear)    (Quad)   (Total)
    R1        2.65009   0.00271   0.00537   0.00444   0.00981   2.65990
    R2        2.62367  -0.00204  -0.00396  -0.00404  -0.00800   2.61567
    R3        2.04815  -0.00038  -0.00023  -0.00122  -0.00144   2.04671
    R4        2.64596  -0.00080   0.00121  -0.00239  -0.00117   2.64480
    R5        2.04771  -0.00118   0.00018  -0.00415  -0.00396   2.04375
    R6        2.66130   0.00556   0.00009   0.01621   0.01633   2.67763
    R7        2.74201  -0.00359  -0.01749  -0.00507  -0.02242   2.71960
    R8        2.63731  -0.00171  -0.00098  -0.00402  -0.00501   2.63230
    R9        2.79580  -0.00323  -0.00399  -0.00928  -0.01339   2.78241
   R10        2.65460   0.00148   0.00654   0.00046   0.00699   2.66158
   R11        2.04488   0.00008  -0.00049   0.00050   0.00001   2.04490
   R12        2.04939   0.00015   0.00009   0.00048   0.00056   2.04996
   R13        2.34213   0.01206   0.00814   0.01194   0.02008   2.36221
   R14        2.79155  -0.00508  -0.00749  -0.01516  -0.02279   2.76876
   R15        2.77202  -0.01368  -0.01046  -0.04590  -0.05624   2.71577
   R16        2.41179   0.02920   0.02450   0.02680   0.05130   2.46310
   R17        2.66606   0.00551   0.00261   0.01357   0.01616   2.68222
   R18        2.64857  -0.00115   0.00225  -0.00400  -0.00174   2.64683
   R19        2.65612  -0.00575   0.00366  -0.01726  -0.01361   2.64250
   R20        2.65085   0.00280   0.00683   0.00418   0.01101   2.66186
   R21        2.04198  -0.00029  -0.00067  -0.00069  -0.00136   2.04062
   R22        2.66049   0.00454   0.00862   0.00759   0.01620   2.67669
   R23        2.05297  -0.00097   0.00151  -0.00405  -0.00254   2.05043
   R24        2.61145  -0.00224  -0.00633  -0.00293  -0.00927   2.60218
   R25        3.61115   0.00089  -0.00162   0.00696   0.00535   3.61650
   R26        2.04456  -0.00055  -0.00037  -0.00173  -0.00209   2.04246
   R27        1.83569  -0.00256   0.00518  -0.00812  -0.00294   1.83274
    A1        2.08167   0.00064  -0.00336   0.00422   0.00086   2.08253
    A2        2.09918  -0.00077   0.00167  -0.00550  -0.00383   2.09535
    A3        2.10234   0.00012   0.00169   0.00128   0.00297   2.10530
    A4        2.09664  -0.00056  -0.00078  -0.00204  -0.00279   2.09385
    A5        2.10222  -0.00017  -0.00208  -0.00121  -0.00330   2.09892
    A6        2.08433   0.00073   0.00285   0.00325   0.00609   2.09042
    A7        2.10763  -0.00079   0.00482  -0.00483  -0.00008   2.10756
    A8        2.08780   0.00452   0.00224   0.01996   0.02210   2.10990
    A9        2.08775  -0.00373  -0.00705  -0.01513  -0.02202   2.06572
   A10        2.06869   0.00036  -0.00472   0.00438  -0.00029   2.06840
   A11        2.11756  -0.00172   0.00018  -0.00739  -0.00730   2.11026
   A12        2.09694   0.00136   0.00455   0.00300   0.00759   2.10453
   A13        2.10538  -0.00046   0.00139  -0.00350  -0.00211   2.10326
   A14        2.06330   0.00073  -0.00236   0.00635   0.00399   2.06729
   A15        2.11451  -0.00027   0.00097  -0.00286  -0.00188   2.11263
   A16        2.10636   0.00080   0.00265   0.00176   0.00440   2.11077
   A17        2.08713   0.00031  -0.00199   0.00481   0.00283   2.08996
   A18        2.08969  -0.00111  -0.00067  -0.00657  -0.00723   2.08245
   A19        2.11946  -0.00157  -0.00079  -0.00803  -0.00869   2.11077
   A20        2.05076   0.00167   0.00057   0.00928   0.00959   2.06035
   A21        2.11296  -0.00009   0.00022  -0.00124  -0.00089   2.11207
   A22        2.11218   0.00671   0.01490   0.02487   0.04004   2.15222
   A23        2.02867  -0.00130  -0.02190   0.00452  -0.01751   2.01116
   A24        2.14233  -0.00541   0.00699  -0.02939  -0.02253   2.11980
   A25        2.12347  -0.00044   0.00146  -0.00314  -0.00185   2.12162
   A26        2.07655   0.00198   0.00173   0.00878   0.01059   2.08714
   A27        2.08316  -0.00153  -0.00319  -0.00564  -0.00874   2.07443
   A28        2.07464  -0.00248  -0.01006  -0.00849  -0.01845   2.05620
   A29        2.11808   0.00021   0.00870  -0.00236   0.00629   2.12437
   A30        2.09046   0.00227   0.00136   0.01085   0.01216   2.10261
   A31        2.08390  -0.00070   0.00057  -0.00348  -0.00290   2.08100
   A32        2.07239   0.00066  -0.00152   0.00471   0.00318   2.07558
   A33        2.12690   0.00004   0.00095  -0.00123  -0.00029   2.12661
   A34        2.11244  -0.00107   0.00123  -0.00705  -0.00585   2.10660
   A35        2.12708   0.00050   0.01214  -0.00293   0.00923   2.13631
   A36        2.04366   0.00057  -0.01337   0.00998  -0.00338   2.04028
   A37        2.13652   0.00119   0.00412   0.00431   0.00843   2.14495
   A38        2.07327  -0.00209  -0.00217  -0.00942  -0.01159   2.06168
   A39        2.07340   0.00090  -0.00195   0.00511   0.00316   2.07656
   A40        2.05989  -0.00015  -0.00409   0.00101  -0.00310   2.05679
   A41        2.11130  -0.00097   0.00234  -0.00863  -0.00628   2.10502
   A42        2.11200   0.00113   0.00175   0.00763   0.00938   2.12138
   A43        2.02674  -0.00625   0.02789  -0.06102  -0.03313   1.99360
    D1        0.00001   0.00000   0.00000  -0.00002  -0.00002  -0.00001
    D2        3.14159   0.00000  -0.00001   0.00000  -0.00001   3.14158
    D3       -3.14158   0.00000   0.00001  -0.00002  -0.00001  -3.14159
    D4        0.00000   0.00000   0.00000   0.00000   0.00000   0.00000
    D5        0.00001   0.00000   0.00000   0.00000   0.00000   0.00002
    D6       -3.14159   0.00000   0.00000   0.00001   0.00001  -3.14158
    D7       -3.14158   0.00000   0.00000  -0.00001   0.00000  -3.14159
    D8        0.00000   0.00000   0.00000   0.00001   0.00001   0.00001
    D9       -0.00006   0.00000  -0.00002   0.00005   0.00004  -0.00003
   D10        3.14151   0.00000  -0.00003   0.00001  -0.00002   3.14149
   D11        3.14155   0.00000  -0.00001   0.00003   0.00002   3.14157
   D12       -0.00006   0.00000  -0.00002  -0.00001  -0.00003  -0.00009
   D13        0.00008   0.00000   0.00002  -0.00006  -0.00004   0.00005
   D14       -3.14152   0.00000   0.00003  -0.00004  -0.00001  -3.14152
   D15       -3.14149   0.00000   0.00004  -0.00002   0.00002  -3.14147
   D16        0.00009   0.00000   0.00004   0.00001   0.00005   0.00014
   D17        3.14153   0.00000  -0.00003  -0.00005  -0.00008   3.14145
   D18       -0.00035   0.00001   0.00013   0.00043   0.00056   0.00021
   D19       -0.00008   0.00000  -0.00005  -0.00009  -0.00014  -0.00022
   D20        3.14123   0.00001   0.00012   0.00039   0.00051  -3.14145
   D21       -0.00006   0.00000  -0.00002   0.00003   0.00002  -0.00004
   D22        3.14156   0.00000  -0.00001   0.00002   0.00001   3.14157
   D23        3.14155   0.00000  -0.00002   0.00001  -0.00001   3.14153
   D24       -0.00003   0.00000  -0.00001  -0.00001  -0.00002  -0.00005
   D25        3.14139   0.00000   0.00014   0.00020   0.00034  -3.14146
   D26       -0.00011   0.00000  -0.00004   0.00006   0.00002  -0.00009
   D27       -0.00021   0.00000   0.00015   0.00022   0.00037   0.00015
   D28        3.14148   0.00000  -0.00003   0.00008   0.00005   3.14152
   D29        0.00001   0.00000   0.00000   0.00000   0.00000   0.00001
   D30       -3.14157   0.00000   0.00001  -0.00002  -0.00001  -3.14159
   D31        3.14158   0.00000  -0.00001   0.00001   0.00001   3.14159
   D32        0.00000   0.00000   0.00000   0.00000   0.00000  -0.00001
   D33        0.00011   0.00000   0.00004  -0.00005   0.00000   0.00011
   D34       -3.14150   0.00000   0.00003  -0.00008  -0.00005  -3.14155
   D35       -3.14138   0.00000  -0.00014  -0.00018  -0.00032   3.14148
   D36        0.00020   0.00000  -0.00015  -0.00022  -0.00037  -0.00017
   D37        0.00008   0.00000   0.00005   0.00010   0.00015   0.00023
   D38       -3.14147   0.00000   0.00005   0.00002   0.00007  -3.14140
   D39       -3.14121  -0.00001  -0.00011  -0.00042  -0.00053   3.14144
   D40        0.00043  -0.00001  -0.00011  -0.00050  -0.00061  -0.00018
   D41       -3.14135  -0.00001  -0.00010  -0.00031  -0.00040   3.14144
   D42       -0.00005   0.00000   0.00007   0.00019   0.00025   0.00020
   D43       -0.00010   0.00000  -0.00005  -0.00003  -0.00008  -0.00017
   D44        3.14145   0.00000  -0.00005   0.00005   0.00000   3.14145
   D45        3.14151   0.00000  -0.00003   0.00000  -0.00003   3.14148
   D46       -0.00013   0.00000  -0.00003   0.00008   0.00005  -0.00008
   D47       -3.14151   0.00000   0.00003   0.00000   0.00004  -3.14148
   D48        0.00005   0.00000   0.00002   0.00001   0.00003   0.00008
   D49        0.00007   0.00000   0.00002  -0.00003  -0.00001   0.00006
   D50       -3.14156   0.00000   0.00001  -0.00002  -0.00001  -3.14157
   D51       -3.14152   0.00000   0.00003  -0.00001   0.00002  -3.14150
   D52        0.00008   0.00000   0.00003   0.00005   0.00008   0.00016
   D53        0.00012   0.00000   0.00003  -0.00009  -0.00006   0.00006
   D54       -3.14147   0.00000   0.00003  -0.00003   0.00000  -3.14147
   D55        0.00001   0.00000   0.00000  -0.00003  -0.00002  -0.00001
   D56        3.14157   0.00000  -0.00001   0.00001   0.00001   3.14157
   D57       -3.14155   0.00000   0.00001  -0.00003  -0.00002  -3.14157
   D58        0.00001   0.00000   0.00000   0.00001   0.00001   0.00002
   D59       -0.00004   0.00000  -0.00001   0.00004   0.00003  -0.00001
   D60        3.14157   0.00000  -0.00001   0.00003   0.00003  -3.14159
   D61        3.14155   0.00000  -0.00001  -0.00002  -0.00003   3.14152
   D62       -0.00003   0.00000   0.00000  -0.00003  -0.00003  -0.00005
   D63       -0.00003   0.00000  -0.00001   0.00002   0.00001  -0.00001
   D64        3.14155   0.00000  -0.00001   0.00003   0.00001   3.14156
   D65       -3.14158   0.00000   0.00000  -0.00002  -0.00002   3.14159
   D66       -0.00001   0.00000   0.00000  -0.00002  -0.00002  -0.00002
         Item               Value     Threshold  Converged?
 Maximum Force            0.029203     0.000450     NO 
 RMS     Force            0.003414     0.000300     NO 
 Maximum Displacement     0.080628     0.001800     NO 
 RMS     Displacement     0.013321     0.001200     NO 
 Predicted change in Energy=-2.118436D-03
 GradGradGradGradGradGradGradGradGradGradGradGradGradGradGradGradGradGrad

                          Input orientation:                          
 ---------------------------------------------------------------------
 Center     Atomic      Atomic             Coordinates (Angstroms)
 Number     Number       Type             X           Y           Z
 ---------------------------------------------------------------------
      1          6           0       -5.094632    0.069942   -0.000046
      2          6           0       -4.035020    0.996467   -0.000052
      3          6           0       -2.710634    0.543933   -0.000065
      4          6           0       -2.418716   -0.842613   -0.000039
      5          6           0       -3.479504   -1.745413   -0.000061
      6          6           0       -4.810483   -1.284733   -0.000060
      7          1           0       -6.120050    0.418596   -0.000040
      8          1           0       -4.239662    2.058434   -0.000054
      9          1           0       -3.255394   -2.804064   -0.000067
     10          1           0       -5.621783   -2.004845   -0.000070
     11          6           0       -1.026710   -1.322451    0.000034
     12          8           0       -0.768554   -2.545531   -0.000085
     13          6           0       -1.612171    1.473735   -0.000194
     14          6           0        0.046046   -0.324502   -0.000034
     15          6           0       -0.233801    1.067005   -0.000039
     16          6           0        1.381976   -0.745327   -0.000024
     17          6           0        0.807954    1.999816    0.000064
     18          6           0        2.407402    0.220405    0.000051
     19          1           0        1.596099   -1.803735   -0.000041
     20          6           0        2.159146    1.574855    0.000104
     21          1           0        0.629980    3.070163    0.000175
     22          1           0        2.963204    2.297123    0.000190
     23         35           0        4.221300   -0.389744    0.000094
     24          8           0       -1.949855    2.732647   -0.000041
     25          1           0       -1.198710    3.346148    0.000004
 ---------------------------------------------------------------------
                    Distance matrix (angstroms):
                    1          2          3          4          5
     1  C    0.000000
     2  C    1.407561   0.000000
     3  C    2.430662   1.399566   0.000000
     4  C    2.827240   2.448398   1.416942   0.000000
     5  C    2.429846   2.797589   2.415009   1.392954   0.000000
     6  C    1.384155   2.409402   2.784490   2.432287   1.408450
     7  H    1.083070   2.163628   3.411720   3.910310   3.414004
     8  H    2.164504   1.081505   2.152125   3.425189   3.879058
     9  H    3.412141   3.879672   3.392027   2.132445   1.082112
    10  H    2.140707   3.394951   3.869245   3.407407   2.157930
    11  C    4.299622   3.798330   2.513760   1.472388   2.488995
    12  O    5.055260   4.818251   3.649173   2.371279   2.826559
    13  C    3.754754   2.469409   1.439150   2.452750   3.721538
    14  C    5.155789   4.289528   2.890235   2.518628   3.801117
    15  C    4.962037   3.801873   2.531462   2.901808   4.294680
    16  C    6.527719   5.690139   4.290879   3.801937   4.963281
    17  C    6.210068   4.945817   3.807894   4.300093   5.692894
    18  C    7.503544   6.488997   5.128252   4.941804   6.206457
    19  H    6.948133   6.288930   4.905048   4.128256   5.075938
    20  C    7.408243   6.221111   4.977705   5.176965   6.543589
    21  H    6.463166   5.105139   4.188262   4.960279   6.330690
    22  H    8.359968   7.118064   5.938527   6.230811   7.605957
    23  Br   9.327267   8.371881   6.994530   6.655441   7.819221
    24  O    4.120634   2.713343   2.317164   3.605872   4.732108
    25  H    5.090358   3.683158   3.184073   4.362812   5.579069
                    6          7          8          9         10
     6  C    0.000000
     7  H    2.148557   0.000000
     8  H    3.391548   2.494980   0.000000
     9  H    2.174090   4.311820   4.961116   0.000000
    10  H    1.084790   2.474134   4.291910   2.497709   0.000000
    11  C    3.783961   5.382691   4.664059   2.676230   4.645466
    12  O    4.234005   6.117562   5.765855   2.500242   4.883254
    13  C    4.223546   4.629719   2.691762   4.582548   5.308249
    14  C    4.950546   6.210711   4.903639   4.128889   5.911669
    15  C    5.145550   5.921854   4.126724   4.910722   6.202145
    16  C    6.215907   7.591779   6.282029   5.073814   7.116110
    17  C    6.508079   7.106159   5.047956   6.291904   7.574881
    18  C    7.373148   8.529756   6.896508   6.419865   8.331840
    19  H    6.427570   8.029802   6.998033   4.953548   7.220683
    20  C    7.533456   8.359547   6.417055   6.963632   8.564876
    21  H    6.968770   7.252153   4.973632   7.042917   8.052344
    22  H    8.559199   9.275471   7.206820   8.043200   9.602548
    23  Br   9.076018  10.372894   8.808033   7.856837   9.974709
    24  O    4.931788   4.769209   2.387002   5.688550   5.993903
    25  H    5.872815   5.726268   3.302363   6.484986   6.942384
                   11         12         13         14         15
    11  C    0.000000
    12  O    1.250027   0.000000
    13  C    2.856820   4.106846   0.000000
    14  C    1.465165   2.365701   2.446086   0.000000
    15  C    2.517579   3.651900   1.437126   1.419368   0.000000
    16  C    2.476861   2.804552   3.726815   1.400644   2.428020
    17  C    3.795188   4.810983   2.476644   2.446009   1.398353
    18  C    3.764775   4.211543   4.210440   2.423413   2.773570
    19  H    2.666601   2.478275   4.586372   2.142615   3.404363
    20  C    4.306282   5.054602   3.772672   2.841258   2.446244
    21  H    4.694644   5.787220   2.752422   3.444522   2.181459
    22  H    5.387089   6.113698   4.648873   3.922082   3.425498
    23  Br   5.330248   5.435628   6.123882   4.175764   4.687221
    24  O    4.158848   5.408755   1.303415   3.650997   2.391486
    25  H    4.671766   5.907360   1.917519   3.875962   2.474983
                   16         17         18         19         20
    16  C    0.000000
    17  C    2.804517   0.000000
    18  C    1.408595   2.392601   0.000000
    19  H    1.079850   3.884351   2.180678   0.000000
    20  C    2.446884   1.416443   1.377014   3.425185   0.000000
    21  H    3.888890   1.085043   3.358624   4.968730   2.138760
    22  H    3.428817   2.175659   2.149808   4.322732   1.080824
    23  Br   2.861503   4.166645   1.913767   2.981786   2.848180
    24  O    4.816368   2.853516   5.029618   5.757826   4.269001
    25  H    4.837365   2.416466   4.772244   5.859373   3.796402
                   21         22         23         24         25
    21  H    0.000000
    22  H    2.457951   0.000000
    23  Br   4.986836   2.966826   0.000000
    24  O    2.601820   4.932325   6.916103   0.000000
    25  H    1.849398   4.292083   6.582810   0.969847   0.000000
 Stoichiometry    C14H8BrO2(2)
 Framework group  C1[X(C14H8BrO2)]
 Deg. of freedom    69
 Full point group                 C1      NOp   1
 Largest Abelian subgroup         C1      NOp   1
 Largest concise Abelian subgroup C1      NOp   1
                         Standard orientation:                         
 ---------------------------------------------------------------------
 Center     Atomic      Atomic             Coordinates (Angstroms)
 Number     Number       Type             X           Y           Z
 ---------------------------------------------------------------------
      1          6           0        5.088036    0.036510    0.000048
      2          6           0        4.031307    0.966323    0.000053
      3          6           0        2.705521    0.517906    0.000067
      4          6           0        2.409298   -0.867727    0.000041
      5          6           0        3.467276   -1.773818    0.000063
      6          6           0        4.799679   -1.317275    0.000061
      7          1           0        6.114532    0.381978    0.000041
      8          1           0        4.239248    2.027649    0.000056
      9          1           0        3.239878   -2.831768    0.000068
     10          1           0        5.608738   -2.039904    0.000072
     11          6           0        1.015808   -1.343239   -0.000033
     12          8           0        0.753854   -2.565510    0.000087
     13          6           0        1.609952    1.451115    0.000195
     14          6           0       -0.053842   -0.341961    0.000035
     15          6           0        0.230326    1.048669    0.000040
     16          6           0       -1.391073   -0.758635    0.000025
     17          6           0       -0.808526    1.984712   -0.000062
     18          6           0       -2.413495    0.210278   -0.000049
     19          1           0       -1.608484   -1.816373    0.000042
     20          6           0       -2.161032    1.563951   -0.000103
     21          1           0       -0.627228    3.054501   -0.000174
     22          1           0       -2.962842    2.288713   -0.000188
     23         35           0       -4.229279   -0.394233   -0.000092
     24          8           0        1.951546    2.708972    0.000042
     25          1           0        1.202310    3.324803   -0.000003
 ---------------------------------------------------------------------
 Rotational constants (GHZ):      0.9952498      0.1761784      0.1496818
 Standard basis: 6-311G(d) (5D, 7F)
 There are   375 symmetry adapted cartesian basis functions of A   symmetry.
 There are   356 symmetry adapted basis functions of A   symmetry.
   356 basis functions,   642 primitive gaussians,   375 cartesian basis functions
    72 alpha electrons       71 beta electrons
       nuclear repulsion energy      1392.7998684400 Hartrees.
 NAtoms=   25 NActive=   25 NUniq=   25 SFac= 1.00D+00 NAtFMM=   60 NAOKFM=F Big=F
 Integral buffers will be    262144 words long.
 Raffenetti 2 integral format.
 Two-electron integral symmetry is turned on.
 Nuclear repulsion after empirical dispersion term =     1392.7365107053 Hartrees.
 ------------------------------------------------------------------------------
 Polarizable Continuum Model (PCM)
 =================================
 Model                : PCM (using non-symmetric T matrix).
 Atomic radii         : UFF (Universal Force Field).
 Polarization charges : Total charges.
 Charge compensation  : None.
 Solution method      : On-the-fly selection.
 Cavity type          : Scaled VdW (van der Waals Surface) (Alpha=1.100).
 Cavity algorithm     : GePol (No added spheres)
                        Default sphere list used, NSphG=   25.
                        Lebedev-Laikov grids with approx.  5.0 points / Ang**2.
                        Smoothing algorithm: Karplus/York (Gamma=1.0000).
                        Polarization charges: spherical gaussians, with
                                              point-specific exponents (IZeta= 3).
                        Self-potential: point-specific (ISelfS= 7).
                        Self-field    : sphere-specific E.n sum rule (ISelfD= 2).
 1st derivatives      : Analytical E(r).r(x)/FMM algorithm (CHGder, D1EAlg=3).
                        Cavity 1st derivative terms included.
 Solvent              : Acetonitrile, Eps=  35.688000 Eps(inf)=   1.806874
 ------------------------------------------------------------------------------
 One-electron integrals computed using PRISM.
 NBasis=   356 RedAO= T EigKep=  8.69D-05  NBF=   356
 NBsUse=   356 1.00D-06 EigRej= -1.00D+00 NBFU=   356
 Initial guess from the checkpoint file:  "C:\Users\Shengfu Liao\Desktop\suppliment.chk"
 B after Tr=     0.000000    0.000000    0.000000
         Rot=    1.000000    0.000005    0.000008   -0.000569 Ang=   0.07 deg.
 Initial guess <Sx>= 0.0000 <Sy>= 0.0000 <Sz>= 0.5000 <S**2>= 0.7698 S= 0.5099
 ExpMin= 1.03D-01 ExpMax= 4.40D+05 ExpMxC= 1.51D+04 IAcc=2 IRadAn=         4 AccDes= 0.00D+00
 Harris functional with IExCor=  402 and IRadAn=       4 diagonalized for initial guess.
 HarFok:  IExCor=  402 AccDes= 0.00D+00 IRadAn=         4 IDoV= 1 UseB2=F ITyADJ=14
 ICtDFT=  3500011 ScaDFX=  1.000000  1.000000  1.000000  1.000000
 FoFCou: FMM=F IPFlag=           0 FMFlag=      100000 FMFlg1=           0
         NFxFlg=           0 DoJE=T BraDBF=F KetDBF=T FulRan=T
         wScrn=  0.000000 ICntrl=     500 IOpCl=  0 I1Cent=   200000004 NGrid=           0
         NMat0=    1 NMatS0=      1 NMatT0=    0 NMatD0=    1 NMtDS0=    0 NMtDT0=    0
 Petite list used in FoFCou.
 Requested convergence on RMS density matrix=1.00D-08 within 128 cycles.
 Requested convergence on MAX density matrix=1.00D-06.
 Requested convergence on             energy=1.00D-06.
 No special actions if energy rises.
 Inv3:  Mode=1 IEnd=    14480427.
 Iteration    1 A*A^-1 deviation from unit magnitude is 2.55D-15 for   1292.
 Iteration    1 A*A^-1 deviation from orthogonality  is 2.98D-15 for   1479   1274.
 Iteration    1 A^-1*A deviation from unit magnitude is 2.89D-15 for     82.
 Iteration    1 A^-1*A deviation from orthogonality  is 2.61D-12 for   1596   1483.
 Error on total polarization charges =  0.01437
 SCF Done:  E(UB3LYP) =  -3263.11731583     A.U. after   15 cycles
            NFock= 15  Conv=0.69D-08     -V/T= 2.0017
 <Sx>= 0.0000 <Sy>= 0.0000 <Sz>= 0.5000 <S**2>= 0.7719 S= 0.5109
 <L.S>= 0.000000000000E+00
 Annihilation of the first spin contaminant:
 S**2 before annihilation     0.7719,   after     0.7504
 DoSCS=F DFT=T ScalE2(SS,OS)=  1.000000  1.000000
 ExpMin= 1.03D-01 ExpMax= 4.40D+05 ExpMxC= 1.51D+04 IAcc=3 IRadAn=         5 AccDes= 0.00D+00
 HarFok:  IExCor=  205 AccDes= 0.00D+00 IRadAn=         5 IDoV=-2 UseB2=F ITyADJ=14
 ICtDFT= 12500011 ScaDFX=  1.000000  1.000000  1.000000  1.000000
 Range of M.O.s used for correlation:    31   356
 NBasis=   356 NAE=    72 NBE=    71 NFC=    30 NFV=     0
 NROrb=    326 NOA=    42 NOB=    41 NVA=   284 NVB=   285

 **** Warning!!: The largest alpha MO coefficient is  0.25010226D+02


 **** Warning!!: The smallest alpha delta epsilon is  0.96655320D-01


 **** Warning!!: The largest beta MO coefficient is  0.24035594D+02

 Ignoring spin specification with unrestricted ground state.
 NEqPCM:  Using equilibrium solvation (IEInf=0, Eps=  35.6880, EpsInf=   1.8069)
 Orbital symmetries:
 Alpha Orbitals:
       Occupied  (A) (A) (A) (A) (A) (A) (A) (A) (A) (A) (A) (A)
                 (A) (A) (A) (A) (A) (A) (A) (A) (A) (A) (A) (A)
                 (A) (A) (A) (A) (A) (A) (A) (A) (A) (A) (A) (A)
                 (A) (A) (A) (A) (A) (A) (A) (A) (A) (A) (A) (A)
                 (A) (A) (A) (A) (A) (A) (A) (A) (A) (A) (A) (A)
                 (A) (A) (A) (A) (A) (A) (A) (A) (A) (A) (A) (A)
       Virtual   (A) (A) (A) (A) (A) (A) (A) (A) (A) (A) (A) (A)
                 (A) (A) (A) (A) (A) (A) (A) (A) (A) (A) (A) (A)
                 (A) (A) (A) (A) (A) (A) (A) (A) (A) (A) (A) (A)
                 (A) (A) (A) (A) (A) (A) (A) (A) (A) (A) (A) (A)
                 (A) (A) (A) (A) (A) (A) (A) (A) (A) (A) (A) (A)
                 (A) (A) (A) (A) (A) (A) (A) (A) (A) (A) (A) (A)
                 (A) (A) (A) (A) (A) (A) (A) (A) (A) (A) (A) (A)
                 (A) (A) (A) (A) (A) (A) (A) (A) (A) (A) (A) (A)
                 (A) (A) (A) (A) (A) (A) (A) (A) (A) (A) (A) (A)
                 (A) (A) (A) (A) (A) (A) (A) (A) (A) (A) (A) (A)
                 (A) (A) (A) (A) (A) (A) (A) (A) (A) (A) (A) (A)
                 (A) (A) (A) (A) (A) (A) (A) (A) (A) (A) (A) (A)
                 (A) (A) (A) (A) (A) (A) (A) (A) (A) (A) (A) (A)
                 (A) (A) (A) (A) (A) (A) (A) (A) (A) (A) (A) (A)
                 (A) (A) (A) (A) (A) (A) (A) (A) (A) (A) (A) (A)
                 (A) (A) (A) (A) (A) (A) (A) (A) (A) (A) (A) (A)
                 (A) (A) (A) (A) (A) (A) (A) (A) (A) (A) (A) (A)
                 (A) (A) (A) (A) (A) (A) (A) (A) (A) (A) (A) (A)
                 (A) (A) (A) (A) (A) (A) (A) (A) (A) (A) (A) (A)
                 (A) (A) (A) (A) (A) (A) (A) (A) (A) (A) (A) (A)
                 (A) (A) (A) (A) (A) (A) (A) (A) (A) (A) (A) (A)
                 (A) (A) (A) (A) (A) (A) (A) (A) (A) (A) (A) (A)
                 (A) (A) (A) (A) (A) (A) (A) (A) (A) (A) (A) (A)
                 (A) (A) (A) (A) (A) (A) (A) (A)
 Beta  Orbitals:
       Occupied  (A) (A) (A) (A) (A) (A) (A) (A) (A) (A) (A) (A)
                 (A) (A) (A) (A) (A) (A) (A) (A) (A) (A) (A) (A)
                 (A) (A) (A) (A) (A) (A) (A) (A) (A) (A) (A) (A)
                 (A) (A) (A) (A) (A) (A) (A) (A) (A) (A) (A) (A)
                 (A) (A) (A) (A) (A) (A) (A) (A) (A) (A) (A) (A)
                 (A) (A) (A) (A) (A) (A) (A) (A) (A) (A) (A)
       Virtual   (A) (A) (A) (A) (A) (A) (A) (A) (A) (A) (A) (A)
                 (A) (A) (A) (A) (A) (A) (A) (A) (A) (A) (A) (A)
                 (A) (A) (A) (A) (A) (A) (A) (A) (A) (A) (A) (A)
                 (A) (A) (A) (A) (A) (A) (A) (A) (A) (A) (A) (A)
                 (A) (A) (A) (A) (A) (A) (A) (A) (A) (A) (A) (A)
                 (A) (A) (A) (A) (A) (A) (A) (A) (A) (A) (A) (A)
                 (A) (A) (A) (A) (A) (A) (A) (A) (A) (A) (A) (A)
                 (A) (A) (A) (A) (A) (A) (A) (A) (A) (A) (A) (A)
                 (A) (A) (A) (A) (A) (A) (A) (A) (A) (A) (A) (A)
                 (A) (A) (A) (A) (A) (A) (A) (A) (A) (A) (A) (A)
                 (A) (A) (A) (A) (A) (A) (A) (A) (A) (A) (A) (A)
                 (A) (A) (A) (A) (A) (A) (A) (A) (A) (A) (A) (A)
                 (A) (A) (A) (A) (A) (A) (A) (A) (A) (A) (A) (A)
                 (A) (A) (A) (A) (A) (A) (A) (A) (A) (A) (A) (A)
                 (A) (A) (A) (A) (A) (A) (A) (A) (A) (A) (A) (A)
                 (A) (A) (A) (A) (A) (A) (A) (A) (A) (A) (A) (A)
                 (A) (A) (A) (A) (A) (A) (A) (A) (A) (A) (A) (A)
                 (A) (A) (A) (A) (A) (A) (A) (A) (A) (A) (A) (A)
                 (A) (A) (A) (A) (A) (A) (A) (A) (A) (A) (A) (A)
                 (A) (A) (A) (A) (A) (A) (A) (A) (A) (A) (A) (A)
                 (A) (A) (A) (A) (A) (A) (A) (A) (A) (A) (A) (A)
                 (A) (A) (A) (A) (A) (A) (A) (A) (A) (A) (A) (A)
                 (A) (A) (A) (A) (A) (A) (A) (A) (A) (A) (A) (A)
                 (A) (A) (A) (A) (A) (A) (A) (A) (A)
 Generating guess from densities on rwf.
 Convergence on wavefunction:    0.000001000000000
 Iteration     1 Dimension    10 NMult     0 NNew     10
 CISAX will form    10 AO SS matrices at one time.
 Iteration     2 Dimension    20 NMult    10 NNew     10
 Iteration     3 Dimension    30 NMult    20 NNew     10
 Iteration     4 Dimension    40 NMult    30 NNew     10
 Iteration     5 Dimension    50 NMult    40 NNew     10
 Iteration     6 Dimension    60 NMult    50 NNew     10
 Iteration     7 Dimension    70 NMult    60 NNew     10
 Iteration     8 Dimension    80 NMult    70 NNew     10
 Iteration     9 Dimension    90 NMult    80 NNew     10
 Iteration    10 Dimension    98 NMult    90 NNew      8
 Iteration    11 Dimension   104 NMult    98 NNew      6
 Iteration    12 Dimension   108 NMult   104 NNew      4
 Iteration    13 Dimension   112 NMult   108 NNew      4
 ***********************************************************************
 Excited states from <AA,BB:AA,BB> singles matrix:
 ***********************************************************************
 
 ExtSpn:  IState=     1 X2= 1.009 Y2= 0.009 X2-Y2-1=-7.11D-15
          S2Grnd=  0.772 Ra=  0.006 Rb=  0.007 T=  0.001 S2Ext=  0.013 S2=  0.785
 ExtSpn:  IState=     2 X2= 1.002 Y2= 0.002 X2-Y2-1=-4.44D-16
          S2Grnd=  0.772 Ra=  0.017 Rb=  0.186 T=  0.112 S2Ext=  0.315 S2=  1.087
 ExtSpn:  IState=     3 X2= 1.012 Y2= 0.012 X2-Y2-1= 4.22D-15
          S2Grnd=  0.772 Ra=  0.047 Rb=  0.042 T=  0.082 S2Ext=  0.171 S2=  0.943
 ExtSpn:  IState=     4 X2= 1.010 Y2= 0.010 X2-Y2-1=-2.22D-16
          S2Grnd=  0.772 Ra=  0.081 Rb=  0.088 T=  0.157 S2Ext=  0.325 S2=  1.097
 ExtSpn:  IState=     5 X2= 1.008 Y2= 0.008 X2-Y2-1= 1.55D-15
          S2Grnd=  0.772 Ra=  0.059 Rb=  0.063 T=  0.083 S2Ext=  0.205 S2=  0.977
 Ground to excited state transition densities written to RWF  633
 Ground to excited state transition electric dipole moments (Au):
       state          X           Y           Z        Dip. S.      Osc.
         1         0.1336      0.8348      0.0000      0.7147      0.0299
         2         0.0000      0.0000      0.0005      0.0000      0.0000
         3         0.7606     -0.1451      0.0000      0.5996      0.0416
         4        -0.1984     -0.4892      0.0000      0.2787      0.0206
         5        -1.6212      0.5005      0.0000      2.8789      0.2200
 Ground to excited state transition velocity dipole moments (Au):
       state          X           Y           Z        Dip. S.      Osc.
         1        -0.0111     -0.0645      0.0000      0.0043      0.0454
         2         0.0000      0.0000     -0.0002      0.0000      0.0000
         3        -0.0813      0.0149      0.0000      0.0068      0.0438
         4         0.0227      0.0529      0.0000      0.0033      0.0199
         5         0.1851     -0.0576      0.0000      0.0376      0.2185
 Ground to excited state transition magnetic dipole moments (Au):
       state          X           Y           Z
         1         0.0000      0.0000     -0.0744
         2        -0.0793     -0.3743     -0.0001
         3         0.0000      0.0000     -0.2230
         4         0.0000      0.0000      0.1411
         5         0.0000      0.0000     -1.2989
 Ground to excited state transition velocity quadrupole moments (Au):
       state          XX          YY          ZZ          XY          XZ          YZ
         1        -0.1615     -0.0114      0.0001     -0.1402      0.0000      0.0000
         2         0.0000      0.0000      0.0000      0.0000      0.0092     -0.0012
         3        -0.4563      0.0427      0.0010     -0.0775      0.0000      0.0000
         4         0.5682     -0.0851      0.0118      0.0337      0.0000      0.0000
         5         0.2583      0.1547     -0.0119     -0.3214      0.0000      0.0000
 <0|del|b> * <b|rxdel|0> + <0|del|b> * <b|delr+rdel|0>
 Rotatory Strengths (R) in cgs (10**-40 erg-esu-cm/Gauss)
       state          XX          YY          ZZ    R(velocity)    E-M Angle
         1        -0.0105      0.0003     -0.0018     -0.0040       90.00
         2         0.0008      0.0006      0.0012      0.0009       90.00
         3         0.0046     -0.0020     -0.0027     -0.0001       90.00
         4        -0.0068     -0.0014     -0.0038     -0.0040       90.00
         5        -0.0216      0.0090      0.0127      0.0000       90.00
 1/2[<0|r|b>*<b|rxdel|0> + (<0|rxdel|b>*<b|r|0>)*]
 Rotatory Strengths (R) in cgs (10**-40 erg-esu-cm/Gauss)
       state          XX          YY          ZZ     R(length)
         1         0.0031     -0.0173      0.0021     -0.0040
         2         0.0011      0.0009      0.0000      0.0007
         3        -0.0075      0.0051      0.0025      0.0000
         4        -0.0007     -0.0089     -0.0020     -0.0039
         5         0.0380     -0.0163     -0.0259     -0.0014
  1/2[<0|del|b>*<b|r|0> + (<0|r|b>*<b|del|0>)*] (Au)
       state          X           Y           Z        Dip. S.   Osc.(frdel)
         1        -0.0015     -0.0538      0.0000      0.0553      0.0369
         2         0.0000      0.0000      0.0000      0.0000      0.0000
         3        -0.0619     -0.0022      0.0000      0.0640      0.0427
         4        -0.0045     -0.0259      0.0000      0.0304      0.0203
         5        -0.3000     -0.0288      0.0000      0.3289      0.2192

 Excitation energies and oscillator strengths:
 
 Excited State   1:  2.035-A      1.7087 eV  725.59 nm  f=0.0299  <S**2>=0.785
     72A -> 73A        0.98305
     69B -> 72B        0.11399
 This state for optimization and/or second-order correction.
 Total Energy, E(TD-HF/TD-KS) =  -3263.05452082    
 Copying the excited state density for this state as the 1-particle RhoCI density.
 
 Excited State   2:  2.313-A      2.4508 eV  505.89 nm  f=0.0000  <S**2>=1.087
     70A -> 73A       -0.12374
     71B -> 72B        0.93894
     71B -> 73B        0.28663
     71B -> 79B       -0.11835
 
 Excited State   3:  2.185-A      2.8291 eV  438.25 nm  f=0.0416  <S**2>=0.943
     72A -> 74A        0.70575
     72A -> 75A        0.16112
     68B -> 73B        0.10984
     69B -> 72B        0.13471
     70B -> 72B        0.59736
 
 Excited State   4:  2.321-A      3.0183 eV  410.77 nm  f=0.0206  <S**2>=1.097
     68A -> 73A       -0.17044
     69A -> 73A        0.10372
     72A -> 75A        0.43844
     67B -> 72B        0.10649
     68B -> 73B        0.14150
     69B -> 72B        0.74387
     70B -> 72B       -0.30836
 
 Excited State   5:  2.215-A      3.1190 eV  397.51 nm  f=0.2200  <S**2>=0.977
     69A -> 73A       -0.14944
     71A -> 73A        0.10639
     72A -> 74A       -0.60822
     72A -> 75A        0.52001
     68B -> 73B        0.13014
     69B -> 73B       -0.14466
     69B -> 75B       -0.11312
     70B -> 72B        0.47944
 SavETr:  write IOETrn=   770 NScale= 10 NData=  16 NLR=1 NState=    5 LETran=      96.
          IDoAtm=1111111111111111111111111
 NEqPCM:  Using equilibrium solvation (IEInf=0, Eps=  35.6880, EpsInf=   1.8069)
          Differentiating once with respect to electric field.
                with respect to dipole field.
          Differentiating once with respect to nuclear coordinates.
          There are     1 degrees of freedom in the 1st order CPHF.  IDoFFX=0 NUNeed=     1.
 LinEq1:  Iter=  0 NonCon=     1 RMS=2.62D-03 Max=1.92D-01 NDo=     1
 AX will form     1 AO Fock derivatives at one time.
 LinEq1:  Iter=  1 NonCon=     1 RMS=1.84D-03 Max=1.55D-01 NDo=     1
 LinEq1:  Iter=  2 NonCon=     1 RMS=1.01D-03 Max=6.60D-02 NDo=     1
 LinEq1:  Iter=  3 NonCon=     1 RMS=7.51D-04 Max=3.08D-02 NDo=     1
 LinEq1:  Iter=  4 NonCon=     1 RMS=5.57D-04 Max=2.43D-02 NDo=     1
 LinEq1:  Iter=  5 NonCon=     1 RMS=3.77D-04 Max=1.80D-02 NDo=     1
 LinEq1:  Iter=  6 NonCon=     1 RMS=3.03D-04 Max=1.68D-02 NDo=     1
 LinEq1:  Iter=  7 NonCon=     1 RMS=2.00D-04 Max=1.31D-02 NDo=     1
 LinEq1:  Iter=  8 NonCon=     1 RMS=1.61D-04 Max=1.21D-02 NDo=     1
 LinEq1:  Iter=  9 NonCon=     1 RMS=7.90D-05 Max=3.68D-03 NDo=     1
 LinEq1:  Iter= 10 NonCon=     1 RMS=4.92D-05 Max=2.66D-03 NDo=     1
 LinEq1:  Iter= 11 NonCon=     1 RMS=2.79D-05 Max=9.08D-04 NDo=     1
 LinEq1:  Iter= 12 NonCon=     1 RMS=1.43D-05 Max=5.05D-04 NDo=     1
 LinEq1:  Iter= 13 NonCon=     1 RMS=1.14D-05 Max=6.18D-04 NDo=     1
 LinEq1:  Iter= 14 NonCon=     1 RMS=7.32D-06 Max=3.45D-04 NDo=     1
 LinEq1:  Iter= 15 NonCon=     1 RMS=4.20D-06 Max=1.94D-04 NDo=     1
 LinEq1:  Iter= 16 NonCon=     1 RMS=2.76D-06 Max=1.46D-04 NDo=     1
 LinEq1:  Iter= 17 NonCon=     1 RMS=1.81D-06 Max=6.80D-05 NDo=     1
 LinEq1:  Iter= 18 NonCon=     1 RMS=9.45D-07 Max=4.17D-05 NDo=     1
 LinEq1:  Iter= 19 NonCon=     1 RMS=7.23D-07 Max=3.33D-05 NDo=     1
 LinEq1:  Iter= 20 NonCon=     1 RMS=4.50D-07 Max=2.53D-05 NDo=     1
 LinEq1:  Iter= 21 NonCon=     1 RMS=2.26D-07 Max=1.13D-05 NDo=     1
 LinEq1:  Iter= 22 NonCon=     1 RMS=1.48D-07 Max=5.96D-06 NDo=     1
 LinEq1:  Iter= 23 NonCon=     1 RMS=7.89D-08 Max=2.72D-06 NDo=     1
 LinEq1:  Iter= 24 NonCon=     1 RMS=4.87D-08 Max=1.46D-06 NDo=     1
 LinEq1:  Iter= 25 NonCon=     1 RMS=2.62D-08 Max=9.92D-07 NDo=     1
 LinEq1:  Iter= 26 NonCon=     1 RMS=1.76D-08 Max=5.79D-07 NDo=     1
 LinEq1:  Iter= 27 NonCon=     1 RMS=7.24D-09 Max=3.43D-07 NDo=     1
 LinEq1:  Iter= 28 NonCon=     1 RMS=3.30D-09 Max=1.02D-07 NDo=     1
 LinEq1:  Iter= 29 NonCon=     1 RMS=2.49D-09 Max=9.79D-08 NDo=     1
 LinEq1:  Iter= 30 NonCon=     1 RMS=8.76D-10 Max=2.95D-08 NDo=     1
 LinEq1:  Iter= 31 NonCon=     1 RMS=3.58D-10 Max=1.49D-08 NDo=     1
 LinEq1:  Iter= 32 NonCon=     1 RMS=2.35D-10 Max=9.90D-09 NDo=     1
 LinEq1:  Iter= 33 NonCon=     1 RMS=8.61D-11 Max=3.04D-09 NDo=     1
 LinEq1:  Iter= 34 NonCon=     1 RMS=3.03D-11 Max=1.06D-09 NDo=     1
 LinEq1:  Iter= 35 NonCon=     0 RMS=2.01D-11 Max=6.45D-10 NDo=     1
 Linear equations converged to 1.000D-10 1.000D-09 after    35 iterations.
 End of Minotr F.D. properties file   721 does not exist.
 End of Minotr F.D. properties file   722 does not exist.
 End of Minotr F.D. properties file   788 does not exist.
 D1PCM: PCM CHGder 1st derivatives, ID1Alg=3 FixD1E=F DoIter=F DoCFld=F I1PDM=6.
 Calling FoFJK, ICntrl=  10005127 FMM=F ISym2X=0 I1Cent= 0 IOpClX= 1 NMat=1 NMatS=1 NMatT=0.
 ***** Axes restored to original set *****
 -------------------------------------------------------------------
 Center     Atomic                   Forces (Hartrees/Bohr)
 Number     Number              X              Y              Z
 -------------------------------------------------------------------
      1        6           0.001473098    0.000499440    0.000001585
      2        6           0.000230304   -0.001595005   -0.000001246
      3        6          -0.002521390    0.001828088   -0.000010360
      4        6          -0.002086450   -0.003307700    0.000001604
      5        6           0.000644825    0.000652700    0.000002154
      6        6           0.000248278   -0.000503400   -0.000001208
      7        1           0.000030509    0.000303444    0.000000174
      8        1           0.000074741    0.000167121   -0.000001380
      9        1          -0.000385342   -0.000039384    0.000000991
     10        1           0.000191954   -0.000200864   -0.000000114
     11        6          -0.000410080    0.003603735   -0.000027054
     12        8           0.000464428   -0.001434921    0.000009865
     13        6           0.001530623   -0.005714617    0.000043795
     14        6           0.003772687   -0.004212983    0.000002248
     15        6           0.001017812    0.003220974   -0.000005546
     16        6          -0.001468260    0.000430026    0.000001615
     17        6           0.001367297   -0.001099900    0.000000418
     18        6          -0.000183760    0.000304947   -0.000001741
     19        1           0.000539683    0.000065195    0.000000831
     20        6          -0.000282717   -0.000659418    0.000002190
     21        1           0.000223520   -0.000472654   -0.000004063
     22        1          -0.000187420    0.000318659   -0.000000203
     23       35          -0.000111882   -0.000222329   -0.000000173
     24        8          -0.003382236    0.010228476   -0.000012062
     25        1          -0.000790223   -0.002159631   -0.000002320
 -------------------------------------------------------------------
 Cartesian Forces:  Max     0.010228476 RMS     0.001838568

 GradGradGradGradGradGradGradGradGradGradGradGradGradGradGradGradGradGrad
 Berny optimization.
 Using GEDIIS/GDIIS optimizer.
 FormGI is forming the generalized inverse of G from B-inverse, IUseBI=4.
 Internal  Forces:  Max     0.008872607 RMS     0.001077598
 Search for a local minimum.
 Step number   3 out of a maximum of  146
 All quantities printed in internal units (Hartrees-Bohrs-Radians)
 Mixed Optimization -- RFO/linear search
 Update second derivatives using D2CorX and points    1    2    3
 DE= -2.30D-03 DEPred=-2.12D-03 R= 1.09D+00
 TightC=F SS=  1.41D+00  RLast= 1.23D-01 DXNew= 8.4853D-01 3.6819D-01
 Trust test= 1.09D+00 RLast= 1.23D-01 DXMaxT set to 5.05D-01
 ITU=  1  1  0
 Use linear search instead of GDIIS.
     Eigenvalues ---    0.00885   0.00897   0.01249   0.01539   0.01565
     Eigenvalues ---    0.01672   0.01730   0.01796   0.01856   0.02148
     Eigenvalues ---    0.02148   0.02160   0.02164   0.02168   0.02170
     Eigenvalues ---    0.02177   0.02184   0.02190   0.02193   0.02199
     Eigenvalues ---    0.02216   0.04043   0.15208   0.16000   0.16000
     Eigenvalues ---    0.16000   0.16000   0.16000   0.16016   0.17414
     Eigenvalues ---    0.17624   0.21255   0.22035   0.22558   0.22643
     Eigenvalues ---    0.23547   0.24566   0.24857   0.25000   0.25000
     Eigenvalues ---    0.25000   0.25447   0.26878   0.31828   0.32995
     Eigenvalues ---    0.33158   0.35396   0.35479   0.35484   0.35611
     Eigenvalues ---    0.35660   0.35678   0.35744   0.35825   0.39291
     Eigenvalues ---    0.40853   0.42311   0.42839   0.43963   0.44944
     Eigenvalues ---    0.45895   0.46216   0.46712   0.46981   0.47312
     Eigenvalues ---    0.48449   0.56219   0.70244   0.94917
 RFO step:  Lambda=-3.74302022D-04 EMin= 8.84805248D-03
 Quartic linear search produced a step of  0.08546.
 Iteration  1 RMS(Cart)=  0.00688657 RMS(Int)=  0.00001574
 Iteration  2 RMS(Cart)=  0.00002827 RMS(Int)=  0.00000232
 Iteration  3 RMS(Cart)=  0.00000000 RMS(Int)=  0.00000232
 Variable       Old X    -DE/DX   Delta X   Delta X   Delta X     New X
                                 (Linear)    (Quad)   (Total)
    R1        2.65990  -0.00113   0.00084  -0.00217  -0.00133   2.65857
    R2        2.61567   0.00030  -0.00068   0.00023  -0.00045   2.61522
    R3        2.04671   0.00007  -0.00012   0.00019   0.00007   2.04677
    R4        2.64480  -0.00167  -0.00010  -0.00386  -0.00396   2.64083
    R5        2.04375   0.00015  -0.00034   0.00046   0.00012   2.04387
    R6        2.67763   0.00192   0.00140   0.00475   0.00615   2.68378
    R7        2.71960   0.00185  -0.00192   0.00449   0.00258   2.72218
    R8        2.63230  -0.00102  -0.00043  -0.00242  -0.00285   2.62945
    R9        2.78241   0.00034  -0.00114   0.00034  -0.00081   2.78160
   R10        2.66158  -0.00087   0.00060  -0.00138  -0.00079   2.66080
   R11        2.04490  -0.00005   0.00000  -0.00018  -0.00018   2.04471
   R12        2.04996  -0.00001   0.00005  -0.00003   0.00002   2.04998
   R13        2.36221   0.00150   0.00172   0.00255   0.00426   2.36647
   R14        2.76876  -0.00035  -0.00195  -0.00206  -0.00401   2.76475
   R15        2.71577   0.00421  -0.00481   0.01273   0.00793   2.72371
   R16        2.46310   0.00887   0.00438   0.01264   0.01703   2.48013
   R17        2.68222   0.00330   0.00138   0.00880   0.01018   2.69239
   R18        2.64683  -0.00130  -0.00015  -0.00280  -0.00295   2.64388
   R19        2.64250   0.00003  -0.00116   0.00049  -0.00067   2.64184
   R20        2.66186  -0.00065   0.00094  -0.00104  -0.00010   2.66175
   R21        2.04062   0.00005  -0.00012   0.00008  -0.00004   2.04058
   R22        2.67669  -0.00037   0.00138  -0.00009   0.00130   2.67799
   R23        2.05043  -0.00051  -0.00022  -0.00144  -0.00165   2.04878
   R24        2.60218  -0.00052  -0.00079  -0.00212  -0.00292   2.59926
   R25        3.61650  -0.00003   0.00046  -0.00030   0.00016   3.61665
   R26        2.04246   0.00007  -0.00018   0.00017  -0.00001   2.04245
   R27        1.83274  -0.00197  -0.00025  -0.00345  -0.00370   1.82905
    A1        2.08253   0.00059   0.00007   0.00216   0.00224   2.08476
    A2        2.09535  -0.00061  -0.00033  -0.00323  -0.00355   2.09180
    A3        2.10530   0.00002   0.00025   0.00106   0.00132   2.10662
    A4        2.09385   0.00015  -0.00024   0.00030   0.00006   2.09391
    A5        2.09892   0.00004  -0.00028   0.00037   0.00009   2.09901
    A6        2.09042  -0.00018   0.00052  -0.00067  -0.00015   2.09027
    A7        2.10756  -0.00065  -0.00001  -0.00239  -0.00240   2.10516
    A8        2.10990   0.00025   0.00189   0.00141   0.00329   2.11320
    A9        2.06572   0.00040  -0.00188   0.00098  -0.00089   2.06483
   A10        2.06840   0.00043  -0.00002   0.00208   0.00206   2.07046
   A11        2.11026  -0.00050  -0.00062  -0.00294  -0.00356   2.10669
   A12        2.10453   0.00006   0.00065   0.00086   0.00151   2.10603
   A13        2.10326  -0.00028  -0.00018  -0.00106  -0.00125   2.10202
   A14        2.06729   0.00054   0.00034   0.00312   0.00346   2.07075
   A15        2.11263  -0.00026  -0.00016  -0.00205  -0.00221   2.11041
   A16        2.11077  -0.00024   0.00038  -0.00108  -0.00071   2.11006
   A17        2.08996   0.00039   0.00024   0.00239   0.00263   2.09259
   A18        2.08245  -0.00016  -0.00062  -0.00130  -0.00192   2.08053
   A19        2.11077  -0.00074  -0.00074  -0.00311  -0.00385   2.10692
   A20        2.06035   0.00185   0.00082   0.00764   0.00845   2.06880
   A21        2.11207  -0.00110  -0.00008  -0.00453  -0.00461   2.10746
   A22        2.15222  -0.00075   0.00342  -0.00090   0.00253   2.15475
   A23        2.01116  -0.00092  -0.00150  -0.00637  -0.00787   2.00329
   A24        2.11980   0.00167  -0.00193   0.00727   0.00534   2.12514
   A25        2.12162  -0.00071  -0.00016  -0.00304  -0.00320   2.11842
   A26        2.08714   0.00001   0.00090  -0.00026   0.00065   2.08779
   A27        2.07443   0.00070  -0.00075   0.00330   0.00255   2.07698
   A28        2.05620  -0.00029  -0.00158  -0.00175  -0.00332   2.05287
   A29        2.12437   0.00219   0.00054   0.00929   0.00982   2.13420
   A30        2.10261  -0.00190   0.00104  -0.00754  -0.00650   2.09612
   A31        2.08100   0.00009  -0.00025   0.00021  -0.00004   2.08096
   A32        2.07558   0.00050   0.00027   0.00352   0.00379   2.07937
   A33        2.12661  -0.00059  -0.00002  -0.00373  -0.00375   2.12286
   A34        2.10660   0.00069  -0.00050   0.00372   0.00323   2.10983
   A35        2.13631  -0.00019   0.00079   0.00027   0.00106   2.13736
   A36        2.04028  -0.00049  -0.00029  -0.00399  -0.00428   2.03600
   A37        2.14495   0.00004   0.00072  -0.00036   0.00035   2.14530
   A38        2.06168  -0.00049  -0.00099  -0.00189  -0.00288   2.05880
   A39        2.07656   0.00044   0.00027   0.00226   0.00253   2.07909
   A40        2.05679   0.00038  -0.00027   0.00067   0.00041   2.05719
   A41        2.10502  -0.00055  -0.00054  -0.00281  -0.00335   2.10167
   A42        2.12138   0.00017   0.00080   0.00214   0.00294   2.12432
   A43        1.99360  -0.00216  -0.00283  -0.01252  -0.01535   1.97825
    D1       -0.00001   0.00000   0.00000  -0.00002  -0.00002  -0.00002
    D2        3.14158   0.00000   0.00000   0.00002   0.00002  -3.14158
    D3       -3.14159   0.00000   0.00000  -0.00003  -0.00003   3.14157
    D4        0.00000   0.00000   0.00000   0.00001   0.00001   0.00001
    D5        0.00002   0.00000   0.00000  -0.00002  -0.00002  -0.00001
    D6       -3.14158   0.00000   0.00000  -0.00001  -0.00001  -3.14159
    D7       -3.14159   0.00000   0.00000  -0.00001  -0.00001   3.14159
    D8        0.00001   0.00000   0.00000   0.00000   0.00000   0.00001
    D9       -0.00003   0.00000   0.00000   0.00009   0.00009   0.00007
   D10        3.14149   0.00000   0.00000   0.00015   0.00014  -3.14155
   D11        3.14157   0.00000   0.00000   0.00005   0.00005  -3.14156
   D12       -0.00009   0.00000   0.00000   0.00011   0.00010   0.00001
   D13        0.00005   0.00000   0.00000  -0.00013  -0.00013  -0.00008
   D14       -3.14152   0.00000   0.00000  -0.00014  -0.00014   3.14152
   D15       -3.14147   0.00000   0.00000  -0.00018  -0.00018   3.14153
   D16        0.00014   0.00000   0.00000  -0.00019  -0.00019  -0.00005
   D17        3.14145   0.00000  -0.00001   0.00014   0.00013   3.14158
   D18        0.00021  -0.00001   0.00005  -0.00062  -0.00057  -0.00036
   D19       -0.00022   0.00000  -0.00001   0.00019   0.00018  -0.00003
   D20       -3.14145  -0.00001   0.00004  -0.00057  -0.00052   3.14121
   D21       -0.00004   0.00000   0.00000   0.00009   0.00009   0.00005
   D22        3.14157   0.00000   0.00000   0.00005   0.00005  -3.14157
   D23        3.14153   0.00000   0.00000   0.00010   0.00010  -3.14155
   D24       -0.00005   0.00000   0.00000   0.00007   0.00006   0.00002
   D25       -3.14146   0.00000   0.00003  -0.00057  -0.00054   3.14118
   D26       -0.00009   0.00000   0.00000   0.00019   0.00019   0.00010
   D27        0.00015   0.00000   0.00003  -0.00058  -0.00055  -0.00040
   D28        3.14152   0.00000   0.00000   0.00017   0.00018  -3.14148
   D29        0.00001   0.00000   0.00000  -0.00002  -0.00002  -0.00001
   D30       -3.14159   0.00000   0.00000  -0.00003  -0.00003   3.14157
   D31        3.14159   0.00000   0.00000   0.00002   0.00002  -3.14158
   D32       -0.00001   0.00000   0.00000   0.00001   0.00001   0.00000
   D33        0.00011   0.00000   0.00000  -0.00018  -0.00018  -0.00007
   D34       -3.14155   0.00000   0.00000  -0.00012  -0.00013   3.14151
   D35        3.14148   0.00001  -0.00003   0.00058   0.00055  -3.14116
   D36       -0.00017   0.00001  -0.00003   0.00063   0.00060   0.00043
   D37        0.00023   0.00000   0.00001  -0.00018  -0.00017   0.00006
   D38       -3.14140   0.00000   0.00001  -0.00022  -0.00021   3.14158
   D39        3.14144   0.00001  -0.00005   0.00062   0.00058  -3.14116
   D40       -0.00018   0.00001  -0.00005   0.00059   0.00054   0.00036
   D41        3.14144   0.00001  -0.00003   0.00042   0.00038  -3.14136
   D42        0.00020   0.00000   0.00002  -0.00033  -0.00031  -0.00011
   D43       -0.00017   0.00000  -0.00001   0.00018   0.00017   0.00000
   D44        3.14145   0.00000   0.00000   0.00021   0.00021  -3.14152
   D45        3.14148   0.00000   0.00000   0.00012   0.00012  -3.14159
   D46       -0.00008   0.00000   0.00000   0.00015   0.00016   0.00008
   D47       -3.14148   0.00000   0.00000  -0.00015  -0.00015   3.14156
   D48        0.00008   0.00000   0.00000  -0.00010  -0.00009  -0.00001
   D49        0.00006   0.00000   0.00000  -0.00009  -0.00009  -0.00004
   D50       -3.14157   0.00000   0.00000  -0.00004  -0.00004   3.14157
   D51       -3.14150   0.00000   0.00000  -0.00009  -0.00009  -3.14159
   D52        0.00016   0.00000   0.00001  -0.00011  -0.00010   0.00005
   D53        0.00006   0.00000  -0.00001  -0.00012  -0.00013  -0.00007
   D54       -3.14147   0.00000   0.00000  -0.00015  -0.00015   3.14157
   D55       -0.00001   0.00000   0.00000   0.00001   0.00000  -0.00001
   D56        3.14157   0.00000   0.00000   0.00004   0.00004  -3.14157
   D57       -3.14157   0.00000   0.00000  -0.00005  -0.00005   3.14157
   D58        0.00002   0.00000   0.00000  -0.00001  -0.00001   0.00000
   D59       -0.00001   0.00000   0.00000   0.00003   0.00004   0.00003
   D60       -3.14159   0.00000   0.00000   0.00001   0.00001  -3.14157
   D61        3.14152   0.00000   0.00000   0.00006   0.00005   3.14157
   D62       -0.00005   0.00000   0.00000   0.00003   0.00003  -0.00002
   D63       -0.00001   0.00000   0.00000   0.00003   0.00003   0.00001
   D64        3.14156   0.00000   0.00000   0.00005   0.00005  -3.14157
   D65        3.14159   0.00000   0.00000  -0.00001  -0.00001   3.14158
   D66       -0.00002   0.00000   0.00000   0.00001   0.00001  -0.00001
         Item               Value     Threshold  Converged?
 Maximum Force            0.008873     0.000450     NO 
 RMS     Force            0.001078     0.000300     NO 
 Maximum Displacement     0.031346     0.001800     NO 
 RMS     Displacement     0.006885     0.001200     NO 
 Predicted change in Energy=-2.013135D-04
 GradGradGradGradGradGradGradGradGradGradGradGradGradGradGradGradGradGrad

                          Input orientation:                          
 ---------------------------------------------------------------------
 Center     Atomic      Atomic             Coordinates (Angstroms)
 Number     Number       Type             X           Y           Z
 ---------------------------------------------------------------------
      1          6           0       -5.094849    0.065564   -0.000012
      2          6           0       -4.039028    0.995341    0.000013
      3          6           0       -2.715020    0.548215    0.000006
      4          6           0       -2.420800   -0.841169   -0.000107
      5          6           0       -3.477521   -1.746412   -0.000114
      6          6           0       -4.809018   -1.288511   -0.000071
      7          1           0       -6.120286    0.414271    0.000019
      8          1           0       -4.247320    2.056664    0.000067
      9          1           0       -3.253670   -2.805020   -0.000173
     10          1           0       -5.617506   -2.011795   -0.000097
     11          6           0       -1.026942   -1.314266   -0.000201
     12          8           0       -0.767228   -2.539323    0.000140
     13          6           0       -1.615777    1.479210    0.000086
     14          6           0        0.047952   -0.321750   -0.000047
     15          6           0       -0.232240    1.075181    0.000099
     16          6           0        1.381097   -0.746197   -0.000035
     17          6           0        0.815764    2.000431    0.000160
     18          6           0        2.409401    0.216391    0.000074
     19          1           0        1.595982   -1.804431   -0.000126
     20          6           0        2.165992    1.570152    0.000165
     21          1           0        0.646568    3.071315    0.000250
     22          1           0        2.970360    2.292067    0.000231
     23         35           0        4.219741   -0.404489    0.000049
     24          8           0       -1.966122    2.744010   -0.000265
     25          1           0       -1.212103    3.350861   -0.000409
 ---------------------------------------------------------------------
                    Distance matrix (angstroms):
                    1          2          3          4          5
     1  C    0.000000
     2  C    1.406856   0.000000
     3  C    2.428279   1.397469   0.000000
     4  C    2.823598   2.447740   1.420195   0.000000
     5  C    2.428788   2.798661   2.418000   1.391447   0.000000
     6  C    1.383914   2.410159   2.785389   2.429753   1.408034
     7  H    1.083105   2.160851   3.407900   3.906703   3.413614
     8  H    2.163974   1.081569   2.150200   3.425435   3.880203
     9  H    3.410307   3.880662   3.396223   2.133163   1.082016
    10  H    2.142100   3.396242   3.870152   3.404305   2.156378
    11  C    4.295556   3.795649   2.513652   1.471958   2.488390
    12  O    5.051113   4.816485   3.650587   2.370238   2.823897
    13  C    3.755308   2.471088   1.440516   2.456058   3.724343
    14  C    5.157366   4.293965   2.896697   2.522803   3.802450
    15  C    4.966316   3.807625   2.538087   2.908984   4.300376
    16  C    6.526626   5.693041   4.295775   3.803083   4.960504
    17  C    6.219250   4.957743   3.817770   4.306976   5.698345
    18  C    7.505766   6.495306   5.135153   4.944620   6.205517
    19  H    6.947237   6.292222   4.911179   4.130667   5.073834
    20  C    7.415093   6.231588   4.986846   5.182000   6.545902
    21  H    6.480618   5.124888   4.203131   4.971547   6.341814
    22  H    8.366894   7.128325   5.946811   6.235525   7.608185
    23  Br   9.326443   8.376562   6.999896   6.654883   7.813360
    24  O    4.118618   2.711971   2.319993   3.613896   4.737956
    25  H    5.086147   3.679671   3.180186   4.362804   5.578021
                    6          7          8          9         10
     6  C    0.000000
     7  H    2.149160   0.000000
     8  H    3.392005   2.491076   0.000000
     9  H    2.172305   4.310606   4.962188   0.000000
    10  H    1.084801   2.477616   4.292990   2.493377   0.000000
    11  C    3.782164   5.378661   4.661974   2.679676   4.643256
    12  O    4.230910   6.113833   5.764905   2.500598   4.878882
    13  C    4.225762   4.628683   2.694155   4.586646   5.310457
    14  C    4.952251   6.211996   4.909808   4.131264   5.912163
    15  C    5.151110   5.925022   4.133301   4.917824   6.207295
    16  C    6.213826   7.590615   6.287695   5.071471   7.112115
    17  C    6.515774   7.115104   5.063397   6.297036   7.581882
    18  C    7.373622   8.531982   6.906413   6.418667   8.330429
    19  H    6.425745   8.028912   7.003729   4.951798   7.216468
    20  C    7.538084   8.366509   6.431739   6.965261   8.568150
    21  H    6.983660   7.269815   4.997965   7.052884   8.067009
    22  H    8.563835   9.282563   7.221518   8.044803   9.605971
    23  Br   9.071933  10.372392   8.817504   7.849485   9.967690
    24  O    4.933892   4.762853   2.382501   5.696448   5.995856
    25  H    5.870398   5.719600   3.299619   6.485589   6.940148
                   11         12         13         14         15
    11  C    0.000000
    12  O    1.252284   0.000000
    13  C    2.854862   4.107145   0.000000
    14  C    1.463040   2.362657   2.451826   0.000000
    15  C    2.518136   3.653881   1.441323   1.424754   0.000000
    16  C    2.474137   2.798321   3.732786   1.399082   2.433162
    17  C    3.792465   4.807830   2.486778   2.445825   1.398000
    18  C    3.761829   4.205345   4.218621   2.421989   2.777731
    19  H    2.668331   2.474839   4.593222   2.143534   3.410947
    20  C    4.302871   5.048917   3.782862   2.839962   2.448778
    21  H    4.694035   5.786024   2.766406   3.445465   2.181022
    22  H    5.383685   6.108346   4.657616   3.920779   3.425998
    23  Br   5.324976   5.424700   6.132013   4.172609   4.691434
    24  O    4.165534   5.417652   1.312426   3.668158   2.406520
    25  H    4.668801   5.906960   1.914688   3.882758   2.477671
                   16         17         18         19         20
    16  C    0.000000
    17  C    2.804206   0.000000
    18  C    1.408539   2.392170   0.000000
    19  H    1.079830   3.884033   2.178387   0.000000
    20  C    2.445717   1.417129   1.375470   3.422385   0.000000
    21  H    3.887536   1.084168   3.355320   4.967322   2.135917
    22  H    3.428820   2.174243   2.150142   4.320904   1.080819
    23  Br   2.859136   4.167817   1.913850   2.973877   2.849050
    24  O    4.835848   2.879549   5.053124   5.777275   4.295615
    25  H    4.848771   2.436372   4.789593   5.870467   3.818698
                   21         22         23         24         25
    21  H    0.000000
    22  H    2.450967   0.000000
    23  Br   4.984855   2.971930   0.000000
    24  O    2.633112   4.957127   6.941033   0.000000
    25  H    1.879576   4.314400   6.603604   0.967890   0.000000
 Stoichiometry    C14H8BrO2(2)
 Framework group  C1[X(C14H8BrO2)]
 Deg. of freedom    69
 Full point group                 C1      NOp   1
 Largest Abelian subgroup         C1      NOp   1
 Largest concise Abelian subgroup C1      NOp   1
                         Standard orientation:                         
 ---------------------------------------------------------------------
 Center     Atomic      Atomic             Coordinates (Angstroms)
 Number     Number       Type             X           Y           Z
 ---------------------------------------------------------------------
      1          6           0        5.087496    0.022487    0.000016
      2          6           0        4.036755    0.958001   -0.000008
      3          6           0        2.710331    0.518093   -0.000002
      4          6           0        2.408548   -0.869667    0.000111
      5          6           0        3.460322   -1.780653    0.000118
      6          6           0        4.794294   -1.330011    0.000075
      7          1           0        6.114818    0.365603   -0.000015
      8          1           0        4.250825    2.018173   -0.000063
      9          1           0        3.230708   -2.838026    0.000177
     10          1           0        5.598830   -2.057688    0.000101
     11          6           0        1.012133   -1.335166    0.000205
     12          8           0        0.745750   -2.558789   -0.000136
     13          6           0        1.616175    1.455062   -0.000082
     14          6           0       -0.057339   -0.336809    0.000051
     15          6           0        0.230459    1.058575   -0.000095
     16          6           0       -1.392776   -0.753989    0.000039
     17          6           0       -0.812491    1.989520   -0.000156
     18          6           0       -2.415821    0.214186   -0.000070
     19          1           0       -1.613421   -1.811036    0.000130
     20          6           0       -2.165042    1.566601   -0.000161
     21          1           0       -0.637464    3.059466   -0.000246
     22          1           0       -2.965466    2.292888   -0.000227
     23         35           0       -4.229516   -0.396823   -0.000045
     24          8           0        1.973405    2.717935    0.000269
     25          1           0        1.222703    3.328884    0.000413
 ---------------------------------------------------------------------
 Rotational constants (GHZ):      0.9925377      0.1760842      0.1495524
 Standard basis: 6-311G(d) (5D, 7F)
 There are   375 symmetry adapted cartesian basis functions of A   symmetry.
 There are   356 symmetry adapted basis functions of A   symmetry.
   356 basis functions,   642 primitive gaussians,   375 cartesian basis functions
    72 alpha electrons       71 beta electrons
       nuclear repulsion energy      1392.0373955785 Hartrees.
 NAtoms=   25 NActive=   25 NUniq=   25 SFac= 1.00D+00 NAtFMM=   60 NAOKFM=F Big=F
 Integral buffers will be    262144 words long.
 Raffenetti 2 integral format.
 Two-electron integral symmetry is turned on.
 Nuclear repulsion after empirical dispersion term =     1391.9740748052 Hartrees.
 ------------------------------------------------------------------------------
 Polarizable Continuum Model (PCM)
 =================================
 Model                : PCM (using non-symmetric T matrix).
 Atomic radii         : UFF (Universal Force Field).
 Polarization charges : Total charges.
 Charge compensation  : None.
 Solution method      : On-the-fly selection.
 Cavity type          : Scaled VdW (van der Waals Surface) (Alpha=1.100).
 Cavity algorithm     : GePol (No added spheres)
                        Default sphere list used, NSphG=   25.
                        Lebedev-Laikov grids with approx.  5.0 points / Ang**2.
                        Smoothing algorithm: Karplus/York (Gamma=1.0000).
                        Polarization charges: spherical gaussians, with
                                              point-specific exponents (IZeta= 3).
                        Self-potential: point-specific (ISelfS= 7).
                        Self-field    : sphere-specific E.n sum rule (ISelfD= 2).
 1st derivatives      : Analytical E(r).r(x)/FMM algorithm (CHGder, D1EAlg=3).
                        Cavity 1st derivative terms included.
 Solvent              : Acetonitrile, Eps=  35.688000 Eps(inf)=   1.806874
 ------------------------------------------------------------------------------
 One-electron integrals computed using PRISM.
 NBasis=   356 RedAO= T EigKep=  8.67D-05  NBF=   356
 NBsUse=   356 1.00D-06 EigRej= -1.00D+00 NBFU=   356
 Initial guess from the checkpoint file:  "C:\Users\Shengfu Liao\Desktop\suppliment.chk"
 B after Tr=     0.000000    0.000000    0.000000
         Rot=    1.000000   -0.000001   -0.000002    0.000551 Ang=  -0.06 deg.
 Initial guess <Sx>= 0.0000 <Sy>= 0.0000 <Sz>= 0.5000 <S**2>= 0.7720 S= 0.5109
 ExpMin= 1.03D-01 ExpMax= 4.40D+05 ExpMxC= 1.51D+04 IAcc=2 IRadAn=         4 AccDes= 0.00D+00
 Harris functional with IExCor=  402 and IRadAn=       4 diagonalized for initial guess.
 HarFok:  IExCor=  402 AccDes= 0.00D+00 IRadAn=         4 IDoV= 1 UseB2=F ITyADJ=14
 ICtDFT=  3500011 ScaDFX=  1.000000  1.000000  1.000000  1.000000
 FoFCou: FMM=F IPFlag=           0 FMFlag=      100000 FMFlg1=           0
         NFxFlg=           0 DoJE=T BraDBF=F KetDBF=T FulRan=T
         wScrn=  0.000000 ICntrl=     500 IOpCl=  0 I1Cent=   200000004 NGrid=           0
         NMat0=    1 NMatS0=      1 NMatT0=    0 NMatD0=    1 NMtDS0=    0 NMtDT0=    0
 Petite list used in FoFCou.
 Requested convergence on RMS density matrix=1.00D-08 within 128 cycles.
 Requested convergence on MAX density matrix=1.00D-06.
 Requested convergence on             energy=1.00D-06.
 No special actions if energy rises.
 Inv3:  Mode=1 IEnd=    14533203.
 Iteration    1 A*A^-1 deviation from unit magnitude is 2.66D-15 for   1476.
 Iteration    1 A*A^-1 deviation from orthogonality  is 2.78D-15 for   1088    828.
 Iteration    1 A^-1*A deviation from unit magnitude is 2.44D-15 for    217.
 Iteration    1 A^-1*A deviation from orthogonality  is 6.27D-12 for   1987   1481.
 Error on total polarization charges =  0.01436
 SCF Done:  E(UB3LYP) =  -3263.11788073     A.U. after   13 cycles
            NFock= 13  Conv=0.78D-08     -V/T= 2.0018
 <Sx>= 0.0000 <Sy>= 0.0000 <Sz>= 0.5000 <S**2>= 0.7725 S= 0.5112
 <L.S>= 0.000000000000E+00
 Annihilation of the first spin contaminant:
 S**2 before annihilation     0.7725,   after     0.7504
 DoSCS=F DFT=T ScalE2(SS,OS)=  1.000000  1.000000
 ExpMin= 1.03D-01 ExpMax= 4.40D+05 ExpMxC= 1.51D+04 IAcc=3 IRadAn=         5 AccDes= 0.00D+00
 HarFok:  IExCor=  205 AccDes= 0.00D+00 IRadAn=         5 IDoV=-2 UseB2=F ITyADJ=14
 ICtDFT= 12500011 ScaDFX=  1.000000  1.000000  1.000000  1.000000
 Range of M.O.s used for correlation:    31   356
 NBasis=   356 NAE=    72 NBE=    71 NFC=    30 NFV=     0
 NROrb=    326 NOA=    42 NOB=    41 NVA=   284 NVB=   285

 **** Warning!!: The largest alpha MO coefficient is  0.24970723D+02


 **** Warning!!: The smallest alpha delta epsilon is  0.97033322D-01


 **** Warning!!: The largest beta MO coefficient is  0.23670567D+02

 Ignoring spin specification with unrestricted ground state.
 NEqPCM:  Using equilibrium solvation (IEInf=0, Eps=  35.6880, EpsInf=   1.8069)
 Orbital symmetries:
 Alpha Orbitals:
       Occupied  (A) (A) (A) (A) (A) (A) (A) (A) (A) (A) (A) (A)
                 (A) (A) (A) (A) (A) (A) (A) (A) (A) (A) (A) (A)
                 (A) (A) (A) (A) (A) (A) (A) (A) (A) (A) (A) (A)
                 (A) (A) (A) (A) (A) (A) (A) (A) (A) (A) (A) (A)
                 (A) (A) (A) (A) (A) (A) (A) (A) (A) (A) (A) (A)
                 (A) (A) (A) (A) (A) (A) (A) (A) (A) (A) (A) (A)
       Virtual   (A) (A) (A) (A) (A) (A) (A) (A) (A) (A) (A) (A)
                 (A) (A) (A) (A) (A) (A) (A) (A) (A) (A) (A) (A)
                 (A) (A) (A) (A) (A) (A) (A) (A) (A) (A) (A) (A)
                 (A) (A) (A) (A) (A) (A) (A) (A) (A) (A) (A) (A)
                 (A) (A) (A) (A) (A) (A) (A) (A) (A) (A) (A) (A)
                 (A) (A) (A) (A) (A) (A) (A) (A) (A) (A) (A) (A)
                 (A) (A) (A) (A) (A) (A) (A) (A) (A) (A) (A) (A)
                 (A) (A) (A) (A) (A) (A) (A) (A) (A) (A) (A) (A)
                 (A) (A) (A) (A) (A) (A) (A) (A) (A) (A) (A) (A)
                 (A) (A) (A) (A) (A) (A) (A) (A) (A) (A) (A) (A)
                 (A) (A) (A) (A) (A) (A) (A) (A) (A) (A) (A) (A)
                 (A) (A) (A) (A) (A) (A) (A) (A) (A) (A) (A) (A)
                 (A) (A) (A) (A) (A) (A) (A) (A) (A) (A) (A) (A)
                 (A) (A) (A) (A) (A) (A) (A) (A) (A) (A) (A) (A)
                 (A) (A) (A) (A) (A) (A) (A) (A) (A) (A) (A) (A)
                 (A) (A) (A) (A) (A) (A) (A) (A) (A) (A) (A) (A)
                 (A) (A) (A) (A) (A) (A) (A) (A) (A) (A) (A) (A)
                 (A) (A) (A) (A) (A) (A) (A) (A) (A) (A) (A) (A)
                 (A) (A) (A) (A) (A) (A) (A) (A) (A) (A) (A) (A)
                 (A) (A) (A) (A) (A) (A) (A) (A) (A) (A) (A) (A)
                 (A) (A) (A) (A) (A) (A) (A) (A) (A) (A) (A) (A)
                 (A) (A) (A) (A) (A) (A) (A) (A) (A) (A) (A) (A)
                 (A) (A) (A) (A) (A) (A) (A) (A) (A) (A) (A) (A)
                 (A) (A) (A) (A) (A) (A) (A) (A)
 Beta  Orbitals:
       Occupied  (A) (A) (A) (A) (A) (A) (A) (A) (A) (A) (A) (A)
                 (A) (A) (A) (A) (A) (A) (A) (A) (A) (A) (A) (A)
                 (A) (A) (A) (A) (A) (A) (A) (A) (A) (A) (A) (A)
                 (A) (A) (A) (A) (A) (A) (A) (A) (A) (A) (A) (A)
                 (A) (A) (A) (A) (A) (A) (A) (A) (A) (A) (A) (A)
                 (A) (A) (A) (A) (A) (A) (A) (A) (A) (A) (A)
       Virtual   (A) (A) (A) (A) (A) (A) (A) (A) (A) (A) (A) (A)
                 (A) (A) (A) (A) (A) (A) (A) (A) (A) (A) (A) (A)
                 (A) (A) (A) (A) (A) (A) (A) (A) (A) (A) (A) (A)
                 (A) (A) (A) (A) (A) (A) (A) (A) (A) (A) (A) (A)
                 (A) (A) (A) (A) (A) (A) (A) (A) (A) (A) (A) (A)
                 (A) (A) (A) (A) (A) (A) (A) (A) (A) (A) (A) (A)
                 (A) (A) (A) (A) (A) (A) (A) (A) (A) (A) (A) (A)
                 (A) (A) (A) (A) (A) (A) (A) (A) (A) (A) (A) (A)
                 (A) (A) (A) (A) (A) (A) (A) (A) (A) (A) (A) (A)
                 (A) (A) (A) (A) (A) (A) (A) (A) (A) (A) (A) (A)
                 (A) (A) (A) (A) (A) (A) (A) (A) (A) (A) (A) (A)
                 (A) (A) (A) (A) (A) (A) (A) (A) (A) (A) (A) (A)
                 (A) (A) (A) (A) (A) (A) (A) (A) (A) (A) (A) (A)
                 (A) (A) (A) (A) (A) (A) (A) (A) (A) (A) (A) (A)
                 (A) (A) (A) (A) (A) (A) (A) (A) (A) (A) (A) (A)
                 (A) (A) (A) (A) (A) (A) (A) (A) (A) (A) (A) (A)
                 (A) (A) (A) (A) (A) (A) (A) (A) (A) (A) (A) (A)
                 (A) (A) (A) (A) (A) (A) (A) (A) (A) (A) (A) (A)
                 (A) (A) (A) (A) (A) (A) (A) (A) (A) (A) (A) (A)
                 (A) (A) (A) (A) (A) (A) (A) (A) (A) (A) (A) (A)
                 (A) (A) (A) (A) (A) (A) (A) (A) (A) (A) (A) (A)
                 (A) (A) (A) (A) (A) (A) (A) (A) (A) (A) (A) (A)
                 (A) (A) (A) (A) (A) (A) (A) (A) (A) (A) (A) (A)
                 (A) (A) (A) (A) (A) (A) (A) (A) (A)
 Generating guess from densities on rwf.
 Convergence on wavefunction:    0.000001000000000
 Iteration     1 Dimension    10 NMult     0 NNew     10
 CISAX will form    10 AO SS matrices at one time.
 Iteration     2 Dimension    20 NMult    10 NNew     10
 Iteration     3 Dimension    30 NMult    20 NNew     10
 Iteration     4 Dimension    40 NMult    30 NNew     10
 Iteration     5 Dimension    50 NMult    40 NNew     10
 Iteration     6 Dimension    60 NMult    50 NNew     10
 Iteration     7 Dimension    70 NMult    60 NNew     10
 Iteration     8 Dimension    80 NMult    70 NNew     10
 Iteration     9 Dimension    88 NMult    80 NNew      8
 Iteration    10 Dimension    94 NMult    88 NNew      6
 Iteration    11 Dimension   100 NMult    94 NNew      6
 Iteration    12 Dimension   104 NMult   100 NNew      4
 Iteration    13 Dimension   106 NMult   104 NNew      2
 ***********************************************************************
 Excited states from <AA,BB:AA,BB> singles matrix:
 ***********************************************************************
 
 ExtSpn:  IState=     1 X2= 1.009 Y2= 0.009 X2-Y2-1=-7.44D-15
          S2Grnd=  0.772 Ra=  0.005 Rb=  0.007 T=  0.000 S2Ext=  0.012 S2=  0.785
 ExtSpn:  IState=     2 X2= 1.002 Y2= 0.002 X2-Y2-1=-2.00D-15
          S2Grnd=  0.772 Ra=  0.017 Rb=  0.190 T=  0.114 S2Ext=  0.321 S2=  1.094
 ExtSpn:  IState=     3 X2= 1.012 Y2= 0.012 X2-Y2-1= 1.55D-14
          S2Grnd=  0.772 Ra=  0.046 Rb=  0.042 T=  0.083 S2Ext=  0.171 S2=  0.944
 ExtSpn:  IState=     4 X2= 1.011 Y2= 0.011 X2-Y2-1= 6.66D-16
          S2Grnd=  0.772 Ra=  0.091 Rb=  0.100 T=  0.179 S2Ext=  0.370 S2=  1.142
 ExtSpn:  IState=     5 X2= 1.006 Y2= 0.006 X2-Y2-1= 8.88D-15
          S2Grnd=  0.772 Ra=  0.036 Rb=  0.046 T=  0.029 S2Ext=  0.112 S2=  0.884
 Ground to excited state transition densities written to RWF  633
 Ground to excited state transition electric dipole moments (Au):
       state          X           Y           Z        Dip. S.      Osc.
         1         0.1424      0.8289     -0.0001      0.7074      0.0298
         2        -0.0002      0.0000      0.0005      0.0000      0.0000
         3         0.6804     -0.1287      0.0000      0.4795      0.0332
         4        -0.1305     -0.5713      0.0000      0.3434      0.0253
         5        -2.0172      0.3848      0.0000      4.2173      0.3231
 Ground to excited state transition velocity dipole moments (Au):
       state          X           Y           Z        Dip. S.      Osc.
         1        -0.0116     -0.0644      0.0000      0.0043      0.0452
         2         0.0000      0.0000     -0.0002      0.0000      0.0000
         3        -0.0730      0.0133      0.0000      0.0055      0.0353
         4         0.0150      0.0619      0.0000      0.0041      0.0244
         5         0.2310     -0.0446      0.0000      0.0554      0.3212
 Ground to excited state transition magnetic dipole moments (Au):
       state          X           Y           Z
         1         0.0000      0.0000     -0.0737
         2        -0.0811     -0.3750      0.0001
         3         0.0000     -0.0001     -0.2567
         4         0.0000      0.0001      0.2297
         5         0.0000     -0.0001     -1.3645
 Ground to excited state transition velocity quadrupole moments (Au):
       state          XX          YY          ZZ          XY          XZ          YZ
         1        -0.1639     -0.0127      0.0002     -0.1395      0.0000      0.0000
         2         0.0001      0.0000      0.0000      0.0000      0.0091     -0.0013
         3        -0.4394      0.0463      0.0006     -0.0844      0.0000      0.0000
         4         0.5694     -0.0955      0.0127      0.0593      0.0000      0.0000
         5         0.4974      0.1413     -0.0108     -0.3231      0.0000      0.0000
 <0|del|b> * <b|rxdel|0> + <0|del|b> * <b|delr+rdel|0>
 Rotatory Strengths (R) in cgs (10**-40 erg-esu-cm/Gauss)
       state          XX          YY          ZZ    R(velocity)    E-M Angle
         1        -0.0046      0.0035     -0.0039     -0.0017       90.00
         2         0.0040     -0.0068     -0.0026     -0.0018       90.00
         3        -0.0021      0.0096     -0.0002      0.0025       90.00
         4         0.0108      0.0009      0.0138      0.0085       90.00
         5        -0.0053     -0.0126      0.0250      0.0024       90.00
 1/2[<0|r|b>*<b|rxdel|0> + (<0|rxdel|b>*<b|r|0>)*]
 Rotatory Strengths (R) in cgs (10**-40 erg-esu-cm/Gauss)
       state          XX          YY          ZZ     R(length)
         1         0.0010     -0.0011     -0.0028     -0.0010
         2        -0.0132      0.0082      0.0000     -0.0017
         3         0.0119     -0.0093      0.0043      0.0023
         4         0.0014      0.0232     -0.0001      0.0082
         5         0.0128      0.0360     -0.0388      0.0033
  1/2[<0|del|b>*<b|r|0> + (<0|r|b>*<b|del|0>)*] (Au)
       state          X           Y           Z        Dip. S.   Osc.(frdel)
         1        -0.0017     -0.0534      0.0000      0.0550      0.0367
         2         0.0000      0.0000      0.0000      0.0000      0.0000
         3        -0.0496     -0.0017      0.0000      0.0514      0.0342
         4        -0.0020     -0.0354      0.0000      0.0373      0.0249
         5        -0.4661     -0.0172      0.0000      0.4833      0.3222

 Excitation energies and oscillator strengths:
 
 Excited State   1:  2.034-A      1.7187 eV  721.37 nm  f=0.0298  <S**2>=0.785
     72A -> 73A        0.98237
     69B -> 72B        0.11899
 This state for optimization and/or second-order correction.
 Total Energy, E(TD-HF/TD-KS) =  -3263.05471830    
 Copying the excited state density for this state as the 1-particle RhoCI density.
 
 Excited State   2:  2.318-A      2.4306 eV  510.10 nm  f=0.0000  <S**2>=1.094
     70A -> 73A       -0.12494
     71B -> 72B        0.93826
     71B -> 73B        0.28875
     71B -> 79B       -0.11853
 
 Excited State   3:  2.185-A      2.8274 eV  438.51 nm  f=0.0332  <S**2>=0.944
     72A -> 74A        0.68487
     72A -> 75A        0.14429
     68B -> 73B        0.11074
     69B -> 72B        0.14182
     70B -> 72B        0.62358
 
 Excited State   4:  2.360-A      3.0102 eV  411.88 nm  f=0.0253  <S**2>=1.142
     68A -> 73A       -0.18171
     69A -> 73A        0.12743
     72A -> 75A        0.35344
     67B -> 72B        0.10868
     68B -> 73B        0.13597
     69B -> 72B        0.76812
     69B -> 73B        0.11351
     70B -> 72B       -0.32631
     70B -> 73B       -0.10039
 
 Excited State   5:  2.130-A      3.1272 eV  396.47 nm  f=0.3231  <S**2>=0.884
     71A -> 73A        0.10743
     72A -> 74A       -0.68863
     72A -> 75A        0.37657
     68B -> 73B        0.14031
     70B -> 72B        0.54437
 SavETr:  write IOETrn=   770 NScale= 10 NData=  16 NLR=1 NState=    5 LETran=      96.
          IDoAtm=1111111111111111111111111
 NEqPCM:  Using equilibrium solvation (IEInf=0, Eps=  35.6880, EpsInf=   1.8069)
          Differentiating once with respect to electric field.
                with respect to dipole field.
          Differentiating once with respect to nuclear coordinates.
          There are     1 degrees of freedom in the 1st order CPHF.  IDoFFX=0 NUNeed=     1.
 LinEq1:  Iter=  0 NonCon=     1 RMS=2.63D-03 Max=1.97D-01 NDo=     1
 AX will form     1 AO Fock derivatives at one time.
 LinEq1:  Iter=  1 NonCon=     1 RMS=1.86D-03 Max=1.58D-01 NDo=     1
 LinEq1:  Iter=  2 NonCon=     1 RMS=1.01D-03 Max=6.66D-02 NDo=     1
 LinEq1:  Iter=  3 NonCon=     1 RMS=7.52D-04 Max=3.14D-02 NDo=     1
 LinEq1:  Iter=  4 NonCon=     1 RMS=5.58D-04 Max=2.44D-02 NDo=     1
 LinEq1:  Iter=  5 NonCon=     1 RMS=3.76D-04 Max=1.81D-02 NDo=     1
 LinEq1:  Iter=  6 NonCon=     1 RMS=3.05D-04 Max=1.71D-02 NDo=     1
 LinEq1:  Iter=  7 NonCon=     1 RMS=2.02D-04 Max=1.34D-02 NDo=     1
 LinEq1:  Iter=  8 NonCon=     1 RMS=1.63D-04 Max=1.25D-02 NDo=     1
 LinEq1:  Iter=  9 NonCon=     1 RMS=8.00D-05 Max=3.72D-03 NDo=     1
 LinEq1:  Iter= 10 NonCon=     1 RMS=4.91D-05 Max=2.65D-03 NDo=     1
 LinEq1:  Iter= 11 NonCon=     1 RMS=2.80D-05 Max=1.02D-03 NDo=     1
 LinEq1:  Iter= 12 NonCon=     1 RMS=1.37D-05 Max=5.11D-04 NDo=     1
 LinEq1:  Iter= 13 NonCon=     1 RMS=1.09D-05 Max=4.76D-04 NDo=     1
 LinEq1:  Iter= 14 NonCon=     1 RMS=7.17D-06 Max=3.21D-04 NDo=     1
 LinEq1:  Iter= 15 NonCon=     1 RMS=4.15D-06 Max=1.96D-04 NDo=     1
 LinEq1:  Iter= 16 NonCon=     1 RMS=2.78D-06 Max=1.47D-04 NDo=     1
 LinEq1:  Iter= 17 NonCon=     1 RMS=1.78D-06 Max=6.10D-05 NDo=     1
 LinEq1:  Iter= 18 NonCon=     1 RMS=8.99D-07 Max=3.90D-05 NDo=     1
 LinEq1:  Iter= 19 NonCon=     1 RMS=6.67D-07 Max=2.79D-05 NDo=     1
 LinEq1:  Iter= 20 NonCon=     1 RMS=4.02D-07 Max=2.38D-05 NDo=     1
 LinEq1:  Iter= 21 NonCon=     1 RMS=2.05D-07 Max=9.46D-06 NDo=     1
 LinEq1:  Iter= 22 NonCon=     1 RMS=1.41D-07 Max=5.07D-06 NDo=     1
 LinEq1:  Iter= 23 NonCon=     1 RMS=7.51D-08 Max=2.47D-06 NDo=     1
 LinEq1:  Iter= 24 NonCon=     1 RMS=4.71D-08 Max=1.40D-06 NDo=     1
 LinEq1:  Iter= 25 NonCon=     1 RMS=2.60D-08 Max=9.71D-07 NDo=     1
 LinEq1:  Iter= 26 NonCon=     1 RMS=1.78D-08 Max=5.69D-07 NDo=     1
 LinEq1:  Iter= 27 NonCon=     1 RMS=7.56D-09 Max=3.55D-07 NDo=     1
 LinEq1:  Iter= 28 NonCon=     1 RMS=3.44D-09 Max=1.13D-07 NDo=     1
 LinEq1:  Iter= 29 NonCon=     1 RMS=2.59D-09 Max=9.66D-08 NDo=     1
 LinEq1:  Iter= 30 NonCon=     1 RMS=9.11D-10 Max=3.11D-08 NDo=     1
 LinEq1:  Iter= 31 NonCon=     1 RMS=3.55D-10 Max=1.44D-08 NDo=     1
 LinEq1:  Iter= 32 NonCon=     1 RMS=2.32D-10 Max=1.04D-08 NDo=     1
 LinEq1:  Iter= 33 NonCon=     1 RMS=8.84D-11 Max=2.82D-09 NDo=     1
 LinEq1:  Iter= 34 NonCon=     0 RMS=2.99D-11 Max=9.70D-10 NDo=     1
 Linear equations converged to 1.000D-10 1.000D-09 after    34 iterations.
 End of Minotr F.D. properties file   721 does not exist.
 End of Minotr F.D. properties file   722 does not exist.
 End of Minotr F.D. properties file   788 does not exist.
 D1PCM: PCM CHGder 1st derivatives, ID1Alg=3 FixD1E=F DoIter=F DoCFld=F I1PDM=6.
 Calling FoFJK, ICntrl=  10005127 FMM=F ISym2X=0 I1Cent= 0 IOpClX= 1 NMat=1 NMatS=1 NMatT=0.
 ***** Axes restored to original set *****
 -------------------------------------------------------------------
 Center     Atomic                   Forces (Hartrees/Bohr)
 Number     Number              X              Y              Z
 -------------------------------------------------------------------
      1        6           0.000455058    0.000708042   -0.000002081
      2        6          -0.000352725   -0.000647882    0.000003575
      3        6           0.000464914   -0.000645642    0.000003963
      4        6          -0.000481638   -0.000277854   -0.000003768
      5        6           0.000029219    0.000295350   -0.000002523
      6        6           0.000147704   -0.000530941    0.000000959
      7        1          -0.000069839    0.000045886   -0.000000586
      8        1          -0.000056039    0.000095495    0.000001890
      9        1          -0.000036103    0.000011278   -0.000000840
     10        1           0.000012226    0.000044936    0.000000722
     11        6          -0.000243036    0.000099622    0.000052665
     12        8          -0.000022929   -0.000220615   -0.000022889
     13        6          -0.000152125   -0.000895329   -0.000044243
     14        6           0.001049683   -0.000498760   -0.000004836
     15        6          -0.000211390    0.000758472   -0.000002281
     16        6          -0.000574153    0.000682943   -0.000000249
     17        6           0.000758599   -0.000510173    0.000003708
     18        6           0.000214728   -0.000803874   -0.000000853
     19        1           0.000055862    0.000035494   -0.000000525
     20        6          -0.001000771    0.000430132   -0.000002019
     21        1          -0.000522632    0.000199927    0.000003861
     22        1          -0.000046450    0.000146038   -0.000000018
     23       35          -0.000069440    0.000033265    0.000000671
     24        8           0.000448180    0.001410754    0.000013619
     25        1           0.000203099    0.000033438    0.000002076
 -------------------------------------------------------------------
 Cartesian Forces:  Max     0.001410754 RMS     0.000393608

 GradGradGradGradGradGradGradGradGradGradGradGradGradGradGradGradGradGrad
 Berny optimization.
 Using GEDIIS/GDIIS optimizer.
 FormGI is forming the generalized inverse of G from B-inverse, IUseBI=4.
 Internal  Forces:  Max     0.001473900 RMS     0.000281518
 Search for a local minimum.
 Step number   4 out of a maximum of  146
 All quantities printed in internal units (Hartrees-Bohrs-Radians)
 Mixed Optimization -- En-DIIS/RFO-DIIS
 Update second derivatives using D2CorX and points    1    2    3    4
 DE= -1.97D-04 DEPred=-2.01D-04 R= 9.81D-01
 TightC=F SS=  1.41D+00  RLast= 3.72D-02 DXNew= 8.4853D-01 1.1174D-01
 Trust test= 9.81D-01 RLast= 3.72D-02 DXMaxT set to 5.05D-01
 ITU=  1  1  1  0
 Use linear search instead of GDIIS.
     Eigenvalues ---    0.00885   0.00897   0.01247   0.01538   0.01564
     Eigenvalues ---    0.01672   0.01730   0.01795   0.01855   0.02148
     Eigenvalues ---    0.02148   0.02160   0.02164   0.02168   0.02170
     Eigenvalues ---    0.02177   0.02183   0.02190   0.02193   0.02199
     Eigenvalues ---    0.02216   0.04043   0.15405   0.16000   0.16000
     Eigenvalues ---    0.16000   0.16000   0.16003   0.16135   0.17262
     Eigenvalues ---    0.17691   0.21316   0.22027   0.22624   0.22678
     Eigenvalues ---    0.23540   0.24574   0.24874   0.25000   0.25000
     Eigenvalues ---    0.25000   0.25104   0.27694   0.31885   0.32924
     Eigenvalues ---    0.33058   0.35474   0.35480   0.35545   0.35611
     Eigenvalues ---    0.35663   0.35735   0.35759   0.36164   0.39400
     Eigenvalues ---    0.41109   0.42280   0.43070   0.43652   0.45238
     Eigenvalues ---    0.45925   0.46383   0.46783   0.46940   0.47165
     Eigenvalues ---    0.48456   0.56006   0.65564   0.94884
 RFO step:  Lambda=-2.93864600D-05 EMin= 8.84918104D-03
 Quartic linear search produced a step of -0.02462.
 Iteration  1 RMS(Cart)=  0.00247953 RMS(Int)=  0.00000347
 Iteration  2 RMS(Cart)=  0.00000437 RMS(Int)=  0.00000025
 Iteration  3 RMS(Cart)=  0.00000000 RMS(Int)=  0.00000025
 Variable       Old X    -DE/DX   Delta X   Delta X   Delta X     New X
                                 (Linear)    (Quad)   (Total)
    R1        2.65857  -0.00061   0.00003  -0.00136  -0.00133   2.65725
    R2        2.61522   0.00031   0.00001   0.00057   0.00058   2.61580
    R3        2.04677   0.00008   0.00000   0.00025   0.00025   2.04702
    R4        2.64083  -0.00003   0.00010  -0.00043  -0.00033   2.64050
    R5        2.04387   0.00011   0.00000   0.00036   0.00036   2.04423
    R6        2.68378   0.00002  -0.00015   0.00049   0.00034   2.68412
    R7        2.72218   0.00030  -0.00006   0.00078   0.00071   2.72289
    R8        2.62945  -0.00019   0.00007  -0.00064  -0.00057   2.62888
    R9        2.78160   0.00014   0.00002   0.00038   0.00040   2.78199
   R10        2.66080  -0.00017   0.00002  -0.00028  -0.00027   2.66053
   R11        2.04471  -0.00002   0.00000  -0.00010  -0.00010   2.04462
   R12        2.04998  -0.00004   0.00000  -0.00012  -0.00012   2.04986
   R13        2.36647   0.00021  -0.00010   0.00068   0.00057   2.36705
   R14        2.76475   0.00045   0.00010   0.00095   0.00105   2.76579
   R15        2.72371  -0.00081  -0.00020  -0.00136  -0.00156   2.72215
   R16        2.48013   0.00122  -0.00042   0.00316   0.00274   2.48287
   R17        2.69239   0.00023  -0.00025   0.00139   0.00114   2.69353
   R18        2.64388  -0.00065   0.00007  -0.00158  -0.00151   2.64237
   R19        2.64184  -0.00068   0.00002  -0.00130  -0.00128   2.64055
   R20        2.66175  -0.00018   0.00000  -0.00023  -0.00023   2.66153
   R21        2.04058  -0.00002   0.00000  -0.00006  -0.00006   2.04052
   R22        2.67799  -0.00084  -0.00003  -0.00152  -0.00156   2.67643
   R23        2.04878   0.00027   0.00004   0.00067   0.00071   2.04949
   R24        2.59926   0.00057   0.00007   0.00084   0.00091   2.60017
   R25        3.61665  -0.00007   0.00000  -0.00052  -0.00052   3.61613
   R26        2.04245   0.00006   0.00000   0.00017   0.00018   2.04263
   R27        1.82905   0.00018   0.00009   0.00015   0.00024   1.82929
    A1        2.08476   0.00001  -0.00006   0.00011   0.00005   2.08482
    A2        2.09180  -0.00004   0.00009  -0.00046  -0.00037   2.09143
    A3        2.10662   0.00003  -0.00003   0.00035   0.00032   2.10694
    A4        2.09391   0.00015   0.00000   0.00059   0.00058   2.09449
    A5        2.09901  -0.00011   0.00000  -0.00052  -0.00052   2.09848
    A6        2.09027  -0.00004   0.00000  -0.00006  -0.00006   2.09021
    A7        2.10516  -0.00013   0.00006  -0.00060  -0.00054   2.10462
    A8        2.11320  -0.00014  -0.00008  -0.00031  -0.00039   2.11281
    A9        2.06483   0.00026   0.00002   0.00090   0.00093   2.06576
   A10        2.07046   0.00003  -0.00005   0.00016   0.00011   2.07057
   A11        2.10669  -0.00016   0.00009  -0.00087  -0.00078   2.10591
   A12        2.10603   0.00013  -0.00004   0.00071   0.00067   2.10671
   A13        2.10202   0.00004   0.00003   0.00020   0.00023   2.10225
   A14        2.07075   0.00002  -0.00009   0.00033   0.00025   2.07100
   A15        2.11041  -0.00006   0.00005  -0.00053  -0.00047   2.10994
   A16        2.11006  -0.00011   0.00002  -0.00045  -0.00043   2.10963
   A17        2.09259   0.00002  -0.00006   0.00015   0.00008   2.09268
   A18        2.08053   0.00009   0.00005   0.00030   0.00035   2.08088
   A19        2.10692  -0.00006   0.00009  -0.00060  -0.00051   2.10641
   A20        2.06880  -0.00006  -0.00021   0.00064   0.00043   2.06923
   A21        2.10746   0.00012   0.00011  -0.00004   0.00008   2.10754
   A22        2.15475  -0.00021  -0.00006  -0.00062  -0.00068   2.15407
   A23        2.00329   0.00147   0.00019   0.00447   0.00467   2.00796
   A24        2.12514  -0.00126  -0.00013  -0.00386  -0.00399   2.12115
   A25        2.11842  -0.00021   0.00008  -0.00102  -0.00094   2.11748
   A26        2.08779   0.00043  -0.00002   0.00170   0.00169   2.08947
   A27        2.07698  -0.00022  -0.00006  -0.00068  -0.00074   2.07624
   A28        2.05287   0.00037   0.00008   0.00097   0.00105   2.05392
   A29        2.13420  -0.00067  -0.00024  -0.00126  -0.00150   2.13269
   A30        2.09612   0.00029   0.00016   0.00030   0.00046   2.09657
   A31        2.08096   0.00010   0.00000   0.00059   0.00059   2.08154
   A32        2.07937   0.00001  -0.00009   0.00037   0.00028   2.07964
   A33        2.12286  -0.00011   0.00009  -0.00096  -0.00087   2.12200
   A34        2.10983  -0.00002  -0.00008   0.00019   0.00011   2.10994
   A35        2.13736  -0.00048  -0.00003  -0.00241  -0.00244   2.13493
   A36        2.03600   0.00050   0.00011   0.00222   0.00232   2.03832
   A37        2.14530  -0.00017  -0.00001  -0.00044  -0.00045   2.14485
   A38        2.05880   0.00008   0.00007   0.00000   0.00007   2.05887
   A39        2.07909   0.00009  -0.00006   0.00044   0.00037   2.07946
   A40        2.05719   0.00002  -0.00001   0.00004   0.00003   2.05723
   A41        2.10167  -0.00014   0.00008  -0.00105  -0.00097   2.10070
   A42        2.12432   0.00012  -0.00007   0.00101   0.00094   2.12526
   A43        1.97825  -0.00019   0.00038  -0.00128  -0.00090   1.97735
    D1       -0.00002   0.00000   0.00000   0.00004   0.00004   0.00001
    D2       -3.14158   0.00000   0.00000  -0.00003  -0.00003   3.14158
    D3        3.14157   0.00000   0.00000   0.00005   0.00005  -3.14157
    D4        0.00001   0.00000   0.00000  -0.00001  -0.00001  -0.00001
    D5       -0.00001   0.00000   0.00000   0.00003   0.00003   0.00002
    D6       -3.14159   0.00000   0.00000  -0.00001  -0.00001  -3.14159
    D7        3.14159   0.00000   0.00000   0.00001   0.00001  -3.14158
    D8        0.00001   0.00000   0.00000  -0.00002  -0.00002  -0.00001
    D9        0.00007   0.00000   0.00000  -0.00014  -0.00014  -0.00008
   D10       -3.14155   0.00000   0.00000  -0.00016  -0.00017   3.14147
   D11       -3.14156   0.00000   0.00000  -0.00008  -0.00008   3.14155
   D12        0.00001   0.00000   0.00000  -0.00010  -0.00010  -0.00009
   D13       -0.00008   0.00000   0.00000   0.00018   0.00018   0.00010
   D14        3.14152   0.00000   0.00000   0.00019   0.00019  -3.14147
   D15        3.14153   0.00000   0.00000   0.00020   0.00021  -3.14144
   D16       -0.00005   0.00000   0.00000   0.00021   0.00021   0.00016
   D17        3.14158   0.00000   0.00000  -0.00001  -0.00001   3.14157
   D18       -0.00036   0.00001   0.00001   0.00059   0.00061   0.00025
   D19       -0.00003   0.00000   0.00000  -0.00003  -0.00003  -0.00007
   D20        3.14121   0.00001   0.00001   0.00057   0.00058  -3.14139
   D21        0.00005   0.00000   0.00000  -0.00012  -0.00012  -0.00007
   D22       -3.14157   0.00000   0.00000  -0.00006  -0.00006   3.14156
   D23       -3.14155   0.00000   0.00000  -0.00012  -0.00012   3.14151
   D24        0.00002   0.00000   0.00000  -0.00006  -0.00006  -0.00005
   D25        3.14118   0.00001   0.00001   0.00123   0.00124  -3.14076
   D26        0.00010   0.00000   0.00000  -0.00037  -0.00037  -0.00027
   D27       -0.00040   0.00001   0.00001   0.00123   0.00125   0.00085
   D28       -3.14148   0.00000   0.00000  -0.00036  -0.00037   3.14134
   D29       -0.00001   0.00000   0.00000   0.00002   0.00002   0.00001
   D30        3.14157   0.00000   0.00000   0.00005   0.00005  -3.14157
   D31       -3.14158   0.00000   0.00000  -0.00004  -0.00004   3.14156
   D32        0.00000   0.00000   0.00000  -0.00001  -0.00001  -0.00001
   D33       -0.00007   0.00000   0.00000   0.00036   0.00036   0.00029
   D34        3.14151   0.00000   0.00000   0.00031   0.00031  -3.14136
   D35       -3.14116  -0.00001  -0.00001  -0.00124  -0.00125   3.14078
   D36        0.00043  -0.00001  -0.00001  -0.00129  -0.00130  -0.00087
   D37        0.00006   0.00000   0.00000   0.00002   0.00002   0.00008
   D38        3.14158   0.00000   0.00001   0.00009   0.00010  -3.14151
   D39       -3.14116  -0.00001  -0.00001  -0.00062  -0.00064   3.14139
   D40        0.00036  -0.00001  -0.00001  -0.00055  -0.00056  -0.00021
   D41       -3.14136  -0.00001  -0.00001  -0.00033  -0.00034   3.14148
   D42       -0.00011   0.00000   0.00001   0.00026   0.00026   0.00016
   D43        0.00000   0.00000   0.00000  -0.00019  -0.00019  -0.00019
   D44       -3.14152  -0.00001  -0.00001  -0.00026  -0.00026   3.14140
   D45       -3.14159   0.00000   0.00000  -0.00014  -0.00014   3.14146
   D46        0.00008   0.00000   0.00000  -0.00021  -0.00021  -0.00014
   D47        3.14156   0.00000   0.00000   0.00015   0.00015  -3.14147
   D48       -0.00001   0.00000   0.00000   0.00009   0.00009   0.00008
   D49       -0.00004   0.00000   0.00000   0.00010   0.00010   0.00007
   D50        3.14157   0.00000   0.00000   0.00004   0.00005  -3.14157
   D51       -3.14159   0.00000   0.00000   0.00011   0.00012  -3.14147
   D52        0.00005   0.00000   0.00000   0.00008   0.00008   0.00014
   D53       -0.00007   0.00000   0.00000   0.00019   0.00019   0.00012
   D54        3.14157   0.00000   0.00000   0.00016   0.00016  -3.14146
   D55       -0.00001   0.00000   0.00000   0.00003   0.00003   0.00003
   D56       -3.14157   0.00000   0.00000  -0.00005  -0.00005   3.14156
   D57        3.14157   0.00000   0.00000   0.00009   0.00009  -3.14153
   D58        0.00000   0.00000   0.00000   0.00001   0.00001   0.00001
   D59        0.00003   0.00000   0.00000  -0.00006  -0.00006  -0.00003
   D60       -3.14157   0.00000   0.00000  -0.00004  -0.00004   3.14157
   D61        3.14157   0.00000   0.00000  -0.00003  -0.00003   3.14155
   D62       -0.00002   0.00000   0.00000  -0.00001  -0.00001  -0.00004
   D63        0.00001   0.00000   0.00000  -0.00005  -0.00006  -0.00004
   D64       -3.14157   0.00000   0.00000  -0.00007  -0.00007   3.14154
   D65        3.14158   0.00000   0.00000   0.00003   0.00003  -3.14158
   D66       -0.00001   0.00000   0.00000   0.00002   0.00002   0.00001
         Item               Value     Threshold  Converged?
 Maximum Force            0.001474     0.000450     NO 
 RMS     Force            0.000282     0.000300     YES
 Maximum Displacement     0.017395     0.001800     NO 
 RMS     Displacement     0.002481     0.001200     NO 
 Predicted change in Energy=-1.481953D-05
 GradGradGradGradGradGradGradGradGradGradGradGradGradGradGradGradGradGrad

                          Input orientation:                          
 ---------------------------------------------------------------------
 Center     Atomic      Atomic             Coordinates (Angstroms)
 Number     Number       Type             X           Y           Z
 ---------------------------------------------------------------------
      1          6           0       -5.094393    0.066066   -0.000148
      2          6           0       -4.038356    0.994536   -0.000076
      3          6           0       -2.714611    0.547181    0.000003
      4          6           0       -2.421400   -0.842598    0.000106
      5          6           0       -3.478476   -1.746964   -0.000001
      6          6           0       -4.809649   -1.288552   -0.000123
      7          1           0       -6.119544    0.416011   -0.000232
      8          1           0       -4.246393    2.056103   -0.000110
      9          1           0       -3.255580   -2.805721    0.000047
     10          1           0       -5.618644   -2.011176   -0.000179
     11          6           0       -1.027330   -1.315723    0.000341
     12          8           0       -0.768137   -2.541199   -0.000465
     13          6           0       -1.615242    1.478610   -0.000073
     14          6           0        0.048368   -0.323260    0.000118
     15          6           0       -0.232700    1.074111    0.000032
     16          6           0        1.381297   -0.745750    0.000053
     17          6           0        0.813873    1.999958    0.000053
     18          6           0        2.408838    0.217475   -0.000014
     19          1           0        1.597831   -1.803615    0.000094
     20          6           0        2.163793    1.571430    0.000011
     21          1           0        0.640939    3.070623    0.000115
     22          1           0        2.966725    2.295082    0.000006
     23         35           0        4.219396   -0.401916   -0.000047
     24          8           0       -1.960279    2.746373    0.000075
     25          1           0       -1.202898    3.349226    0.000117
 ---------------------------------------------------------------------
                    Distance matrix (angstroms):
                    1          2          3          4          5
     1  C    0.000000
     2  C    1.406154   0.000000
     3  C    2.427927   1.397293   0.000000
     4  C    2.823218   2.447368   1.420373   0.000000
     5  C    2.428634   2.798086   2.417972   1.391146   0.000000
     6  C    1.384222   2.409851   2.785516   2.429528   1.407893
     7  H    1.083235   2.160101   3.407459   3.906452   3.413753
     8  H    2.163181   1.081760   2.150163   3.425356   3.879821
     9  H    3.410043   3.880038   3.396263   2.133004   1.081965
    10  H    2.142376   3.395823   3.870220   3.404107   2.156416
    11  C    4.295385   3.795204   2.513429   1.472168   2.488791
    12  O    5.051169   4.816196   3.650596   2.370342   2.824313
    13  C    3.754966   2.470994   1.440893   2.457214   3.725046
    14  C    5.157476   4.293938   2.896847   2.523780   3.803362
    15  C    4.965099   3.806488   2.537230   2.909327   4.300410
    16  C    6.526377   5.692208   4.295129   3.803930   4.961836
    17  C    6.216714   4.955300   3.815856   4.306636   5.697691
    18  C    7.504758   6.493854   5.134047   4.945195   6.206407
    19  H    6.948493   6.292555   4.911558   4.132526   5.076623
    20  C    7.412650   6.228922   4.984769   5.181846   6.545757
    21  H    6.474673   5.119174   4.198509   4.969027   6.338669
    22  H    8.363619   7.124786   5.944134   6.235136   7.607808
    23  Br   9.325538   8.374996   6.998660   6.655402   7.814498
    24  O    4.123920   2.717966   2.324965   3.618474   4.742890
    25  H    5.091450   3.685700   3.183823   4.365333   5.581165
                    6          7          8          9         10
     6  C    0.000000
     7  H    2.149736   0.000000
     8  H    3.391751   2.489698   0.000000
     9  H    2.171850   4.310667   4.961758   0.000000
    10  H    1.084739   2.478335   4.292532   2.493065   0.000000
    11  C    3.782416   5.378619   4.661713   2.680521   4.643686
    12  O    4.231186   6.114135   5.764845   2.501468   4.879379
    13  C    4.226278   4.627943   2.693781   4.587614   5.310917
    14  C    4.952991   6.212058   4.909820   4.132637   5.913044
    15  C    5.150790   5.923515   4.132074   4.918425   6.207044
    16  C    6.214696   7.590277   6.286594   5.073865   7.113401
    17  C    6.514468   7.112043   5.060577   6.297221   7.580664
    18  C    7.373919   8.530693   6.904539   6.420697   8.331108
    19  H    6.428148   8.030232   7.003740   4.955786   7.219460
    20  C    7.537135   8.363532   6.428483   6.966280   8.567462
    21  H    6.979350   7.262995   4.991520   7.050836   8.062696
    22  H    8.562384   9.278534   7.217075   8.045823   9.604812
    23  Br   9.072474  10.371244   8.815409   7.851977   9.968789
    24  O    4.939588   4.767606   2.388051   5.701189   6.001493
    25  H    5.875171   5.725134   3.306815   6.488210   6.944978
                   11         12         13         14         15
    11  C    0.000000
    12  O    1.252587   0.000000
    13  C    2.855509   4.108095   0.000000
    14  C    1.463595   2.363458   2.452413   0.000000
    15  C    2.518480   3.654744   1.440500   1.425357   0.000000
    16  C    2.475147   2.800661   3.731892   1.398284   2.432464
    17  C    3.792593   4.808831   2.484432   2.446086   1.397321
    18  C    3.762705   4.207547   4.217070   2.421614   2.776968
    19  H    2.670114   2.478273   4.593129   2.142962   3.410593
    20  C    4.303361   5.050736   3.780175   2.839872   2.447551
    21  H    4.692883   5.786021   2.761315   3.445226   2.179290
    22  H    5.384272   6.110548   4.654143   3.920780   3.424484
    23  Br   5.325710   5.426972   6.130202   4.171770   4.690396
    24  O    4.167855   5.420297   1.313878   3.668421   2.404370
    25  H    4.668251   5.906447   1.915524   3.879796   2.473344
                   16         17         18         19         20
    16  C    0.000000
    17  C    2.803727   0.000000
    18  C    1.408419   2.391895   0.000000
    19  H    1.079798   3.883523   2.177736   0.000000
    20  C    2.445736   1.416306   1.375951   3.422169   0.000000
    21  H    3.887523   1.084541   3.356474   4.967276   2.136975
    22  H    3.429321   2.172986   2.151206   4.321247   1.080912
    23  Br   2.858851   4.167324   1.913574   2.972770   2.849491
    24  O    4.833328   2.872813   5.048219   5.776032   4.288178
    25  H    4.842199   2.426497   4.780429   5.864797   3.807252
                   21         22         23         24         25
    21  H    0.000000
    22  H    2.451681   0.000000
    23  Br   4.986369   2.973715   0.000000
    24  O    2.621350   4.947629   6.935425   0.000000
    25  H    1.864767   4.300811   6.593356   0.968017   0.000000
 Stoichiometry    C14H8BrO2(2)
 Framework group  C1[X(C14H8BrO2)]
 Deg. of freedom    69
 Full point group                 C1      NOp   1
 Largest Abelian subgroup         C1      NOp   1
 Largest concise Abelian subgroup C1      NOp   1
                         Standard orientation:                         
 ---------------------------------------------------------------------
 Center     Atomic      Atomic             Coordinates (Angstroms)
 Number     Number       Type             X           Y           Z
 ---------------------------------------------------------------------
      1          6           0        5.087012    0.025255    0.000125
      2          6           0        4.035553    0.958905    0.000054
      3          6           0        2.709625    0.518063   -0.000025
      4          6           0        2.409585   -0.870258   -0.000128
      5          6           0        3.462202   -1.779809   -0.000021
      6          6           0        4.795613   -1.327947    0.000100
      7          1           0        6.113872    0.370157    0.000209
      8          1           0        4.248805    2.019437    0.000088
      9          1           0        3.234105   -2.837458   -0.000069
     10          1           0        5.601046   -2.054539    0.000156
     11          6           0        1.013206   -1.336523   -0.000364
     12          8           0        0.747993   -2.560711    0.000442
     13          6           0        1.614847    1.454885    0.000051
     14          6           0       -0.057600   -0.338785   -0.000140
     15          6           0        0.230334    1.057187   -0.000055
     16          6           0       -1.392590   -0.754718   -0.000076
     17          6           0       -0.811675    1.988168   -0.000075
     18          6           0       -2.415384    0.213547   -0.000009
     19          1           0       -1.614322   -1.811505   -0.000117
     20          6           0       -2.163686    1.566281   -0.000033
     21          1           0       -0.633481    3.057970   -0.000138
     22          1           0       -2.963051    2.293871   -0.000028
     23         35           0       -4.228965   -0.396936    0.000025
     24          8           0        1.966113    2.720937   -0.000097
     25          1           0        1.211704    3.327505   -0.000140
 ---------------------------------------------------------------------
 Rotational constants (GHZ):      0.9919743      0.1761329      0.1495747
 Standard basis: 6-311G(d) (5D, 7F)
 There are   375 symmetry adapted cartesian basis functions of A   symmetry.
 There are   356 symmetry adapted basis functions of A   symmetry.
   356 basis functions,   642 primitive gaussians,   375 cartesian basis functions
    72 alpha electrons       71 beta electrons
       nuclear repulsion energy      1392.0501736501 Hartrees.
 NAtoms=   25 NActive=   25 NUniq=   25 SFac= 1.00D+00 NAtFMM=   60 NAOKFM=F Big=F
 Integral buffers will be    262144 words long.
 Raffenetti 2 integral format.
 Two-electron integral symmetry is turned on.
 Nuclear repulsion after empirical dispersion term =     1391.9868490768 Hartrees.
 ------------------------------------------------------------------------------
 Polarizable Continuum Model (PCM)
 =================================
 Model                : PCM (using non-symmetric T matrix).
 Atomic radii         : UFF (Universal Force Field).
 Polarization charges : Total charges.
 Charge compensation  : None.
 Solution method      : On-the-fly selection.
 Cavity type          : Scaled VdW (van der Waals Surface) (Alpha=1.100).
 Cavity algorithm     : GePol (No added spheres)
                        Default sphere list used, NSphG=   25.
                        Lebedev-Laikov grids with approx.  5.0 points / Ang**2.
                        Smoothing algorithm: Karplus/York (Gamma=1.0000).
                        Polarization charges: spherical gaussians, with
                                              point-specific exponents (IZeta= 3).
                        Self-potential: point-specific (ISelfS= 7).
                        Self-field    : sphere-specific E.n sum rule (ISelfD= 2).
 1st derivatives      : Analytical E(r).r(x)/FMM algorithm (CHGder, D1EAlg=3).
                        Cavity 1st derivative terms included.
 Solvent              : Acetonitrile, Eps=  35.688000 Eps(inf)=   1.806874
 ------------------------------------------------------------------------------
 One-electron integrals computed using PRISM.
 NBasis=   356 RedAO= T EigKep=  8.66D-05  NBF=   356
 NBsUse=   356 1.00D-06 EigRej= -1.00D+00 NBFU=   356
 Initial guess from the checkpoint file:  "C:\Users\Shengfu Liao\Desktop\suppliment.chk"
 B after Tr=     0.000000    0.000000    0.000000
         Rot=    1.000000    0.000015   -0.000006   -0.000172 Ang=   0.02 deg.
 Initial guess <Sx>= 0.0000 <Sy>= 0.0000 <Sz>= 0.5000 <S**2>= 0.7725 S= 0.5112
 Requested convergence on RMS density matrix=1.00D-08 within 128 cycles.
 Requested convergence on MAX density matrix=1.00D-06.
 Requested convergence on             energy=1.00D-06.
 No special actions if energy rises.
 Inv3:  Mode=1 IEnd=    14454075.
 Iteration    1 A*A^-1 deviation from unit magnitude is 2.44D-15 for   1127.
 Iteration    1 A*A^-1 deviation from orthogonality  is 2.15D-15 for   1086    826.
 Iteration    1 A^-1*A deviation from unit magnitude is 2.66D-15 for     18.
 Iteration    1 A^-1*A deviation from orthogonality  is 4.58D-12 for   2141   1477.
 Error on total polarization charges =  0.01435
 SCF Done:  E(UB3LYP) =  -3263.11804754     A.U. after   10 cycles
            NFock= 10  Conv=0.72D-08     -V/T= 2.0018
 <Sx>= 0.0000 <Sy>= 0.0000 <Sz>= 0.5000 <S**2>= 0.7725 S= 0.5112
 <L.S>= 0.000000000000E+00
 Annihilation of the first spin contaminant:
 S**2 before annihilation     0.7725,   after     0.7504
 DoSCS=F DFT=T ScalE2(SS,OS)=  1.000000  1.000000
 ExpMin= 1.03D-01 ExpMax= 4.40D+05 ExpMxC= 1.51D+04 IAcc=3 IRadAn=         5 AccDes= 0.00D+00
 HarFok:  IExCor=  205 AccDes= 0.00D+00 IRadAn=         5 IDoV=-2 UseB2=F ITyADJ=14
 ICtDFT= 12500011 ScaDFX=  1.000000  1.000000  1.000000  1.000000
 Range of M.O.s used for correlation:    31   356
 NBasis=   356 NAE=    72 NBE=    71 NFC=    30 NFV=     0
 NROrb=    326 NOA=    42 NOB=    41 NVA=   284 NVB=   285

 **** Warning!!: The largest alpha MO coefficient is  0.25100654D+02


 **** Warning!!: The smallest alpha delta epsilon is  0.97193464D-01


 **** Warning!!: The largest beta MO coefficient is  0.23885319D+02

 Ignoring spin specification with unrestricted ground state.
 NEqPCM:  Using equilibrium solvation (IEInf=0, Eps=  35.6880, EpsInf=   1.8069)
 Orbital symmetries:
 Alpha Orbitals:
       Occupied  (A) (A) (A) (A) (A) (A) (A) (A) (A) (A) (A) (A)
                 (A) (A) (A) (A) (A) (A) (A) (A) (A) (A) (A) (A)
                 (A) (A) (A) (A) (A) (A) (A) (A) (A) (A) (A) (A)
                 (A) (A) (A) (A) (A) (A) (A) (A) (A) (A) (A) (A)
                 (A) (A) (A) (A) (A) (A) (A) (A) (A) (A) (A) (A)
                 (A) (A) (A) (A) (A) (A) (A) (A) (A) (A) (A) (A)
       Virtual   (A) (A) (A) (A) (A) (A) (A) (A) (A) (A) (A) (A)
                 (A) (A) (A) (A) (A) (A) (A) (A) (A) (A) (A) (A)
                 (A) (A) (A) (A) (A) (A) (A) (A) (A) (A) (A) (A)
                 (A) (A) (A) (A) (A) (A) (A) (A) (A) (A) (A) (A)
                 (A) (A) (A) (A) (A) (A) (A) (A) (A) (A) (A) (A)
                 (A) (A) (A) (A) (A) (A) (A) (A) (A) (A) (A) (A)
                 (A) (A) (A) (A) (A) (A) (A) (A) (A) (A) (A) (A)
                 (A) (A) (A) (A) (A) (A) (A) (A) (A) (A) (A) (A)
                 (A) (A) (A) (A) (A) (A) (A) (A) (A) (A) (A) (A)
                 (A) (A) (A) (A) (A) (A) (A) (A) (A) (A) (A) (A)
                 (A) (A) (A) (A) (A) (A) (A) (A) (A) (A) (A) (A)
                 (A) (A) (A) (A) (A) (A) (A) (A) (A) (A) (A) (A)
                 (A) (A) (A) (A) (A) (A) (A) (A) (A) (A) (A) (A)
                 (A) (A) (A) (A) (A) (A) (A) (A) (A) (A) (A) (A)
                 (A) (A) (A) (A) (A) (A) (A) (A) (A) (A) (A) (A)
                 (A) (A) (A) (A) (A) (A) (A) (A) (A) (A) (A) (A)
                 (A) (A) (A) (A) (A) (A) (A) (A) (A) (A) (A) (A)
                 (A) (A) (A) (A) (A) (A) (A) (A) (A) (A) (A) (A)
                 (A) (A) (A) (A) (A) (A) (A) (A) (A) (A) (A) (A)
                 (A) (A) (A) (A) (A) (A) (A) (A) (A) (A) (A) (A)
                 (A) (A) (A) (A) (A) (A) (A) (A) (A) (A) (A) (A)
                 (A) (A) (A) (A) (A) (A) (A) (A) (A) (A) (A) (A)
                 (A) (A) (A) (A) (A) (A) (A) (A) (A) (A) (A) (A)
                 (A) (A) (A) (A) (A) (A) (A) (A)
 Beta  Orbitals:
       Occupied  (A) (A) (A) (A) (A) (A) (A) (A) (A) (A) (A) (A)
                 (A) (A) (A) (A) (A) (A) (A) (A) (A) (A) (A) (A)
                 (A) (A) (A) (A) (A) (A) (A) (A) (A) (A) (A) (A)
                 (A) (A) (A) (A) (A) (A) (A) (A) (A) (A) (A) (A)
                 (A) (A) (A) (A) (A) (A) (A) (A) (A) (A) (A) (A)
                 (A) (A) (A) (A) (A) (A) (A) (A) (A) (A) (A)
       Virtual   (A) (A) (A) (A) (A) (A) (A) (A) (A) (A) (A) (A)
                 (A) (A) (A) (A) (A) (A) (A) (A) (A) (A) (A) (A)
                 (A) (A) (A) (A) (A) (A) (A) (A) (A) (A) (A) (A)
                 (A) (A) (A) (A) (A) (A) (A) (A) (A) (A) (A) (A)
                 (A) (A) (A) (A) (A) (A) (A) (A) (A) (A) (A) (A)
                 (A) (A) (A) (A) (A) (A) (A) (A) (A) (A) (A) (A)
                 (A) (A) (A) (A) (A) (A) (A) (A) (A) (A) (A) (A)
                 (A) (A) (A) (A) (A) (A) (A) (A) (A) (A) (A) (A)
                 (A) (A) (A) (A) (A) (A) (A) (A) (A) (A) (A) (A)
                 (A) (A) (A) (A) (A) (A) (A) (A) (A) (A) (A) (A)
                 (A) (A) (A) (A) (A) (A) (A) (A) (A) (A) (A) (A)
                 (A) (A) (A) (A) (A) (A) (A) (A) (A) (A) (A) (A)
                 (A) (A) (A) (A) (A) (A) (A) (A) (A) (A) (A) (A)
                 (A) (A) (A) (A) (A) (A) (A) (A) (A) (A) (A) (A)
                 (A) (A) (A) (A) (A) (A) (A) (A) (A) (A) (A) (A)
                 (A) (A) (A) (A) (A) (A) (A) (A) (A) (A) (A) (A)
                 (A) (A) (A) (A) (A) (A) (A) (A) (A) (A) (A) (A)
                 (A) (A) (A) (A) (A) (A) (A) (A) (A) (A) (A) (A)
                 (A) (A) (A) (A) (A) (A) (A) (A) (A) (A) (A) (A)
                 (A) (A) (A) (A) (A) (A) (A) (A) (A) (A) (A) (A)
                 (A) (A) (A) (A) (A) (A) (A) (A) (A) (A) (A) (A)
                 (A) (A) (A) (A) (A) (A) (A) (A) (A) (A) (A) (A)
                 (A) (A) (A) (A) (A) (A) (A) (A) (A) (A) (A) (A)
                 (A) (A) (A) (A) (A) (A) (A) (A) (A)
 Generating guess from densities on rwf.
 Convergence on wavefunction:    0.000001000000000
 Iteration     1 Dimension    10 NMult     0 NNew     10
 CISAX will form    10 AO SS matrices at one time.
 Iteration     2 Dimension    20 NMult    10 NNew     10
 Iteration     3 Dimension    30 NMult    20 NNew     10
 Iteration     4 Dimension    40 NMult    30 NNew     10
 Iteration     5 Dimension    50 NMult    40 NNew     10
 Iteration     6 Dimension    60 NMult    50 NNew     10
 Iteration     7 Dimension    70 NMult    60 NNew     10
 Iteration     8 Dimension    78 NMult    70 NNew      8
 Iteration     9 Dimension    84 NMult    78 NNew      6
 Iteration    10 Dimension    88 NMult    84 NNew      4
 Iteration    11 Dimension    90 NMult    88 NNew      2
 Iteration    12 Dimension    92 NMult    90 NNew      2
 Iteration    13 Dimension    94 NMult    92 NNew      2
 ***********************************************************************
 Excited states from <AA,BB:AA,BB> singles matrix:
 ***********************************************************************
 
 ExtSpn:  IState=     1 X2= 1.009 Y2= 0.009 X2-Y2-1= 7.77D-15
          S2Grnd=  0.772 Ra=  0.005 Rb=  0.007 T=  0.000 S2Ext=  0.012 S2=  0.785
 ExtSpn:  IState=     2 X2= 1.002 Y2= 0.002 X2-Y2-1= 6.66D-16
          S2Grnd=  0.772 Ra=  0.017 Rb=  0.190 T=  0.114 S2Ext=  0.320 S2=  1.093
 ExtSpn:  IState=     3 X2= 1.012 Y2= 0.012 X2-Y2-1= 1.02D-14
          S2Grnd=  0.772 Ra=  0.045 Rb=  0.042 T=  0.081 S2Ext=  0.168 S2=  0.941
 ExtSpn:  IState=     4 X2= 1.011 Y2= 0.011 X2-Y2-1= 4.00D-15
          S2Grnd=  0.772 Ra=  0.091 Rb=  0.099 T=  0.179 S2Ext=  0.368 S2=  1.141
 ExtSpn:  IState=     5 X2= 1.006 Y2= 0.006 X2-Y2-1= 4.88D-15
          S2Grnd=  0.772 Ra=  0.031 Rb=  0.042 T=  0.018 S2Ext=  0.091 S2=  0.864
 Ground to excited state transition densities written to RWF  633
 Ground to excited state transition electric dipole moments (Au):
       state          X           Y           Z        Dip. S.      Osc.
         1         0.1397      0.8286      0.0001      0.7060      0.0298
         2         0.0005      0.0000      0.0005      0.0000      0.0000
         3         0.6613     -0.1273      0.0000      0.4535      0.0314
         4        -0.1214     -0.5819      0.0000      0.3534      0.0261
         5        -2.1067      0.3452      0.0000      4.5575      0.3491
 Ground to excited state transition velocity dipole moments (Au):
       state          X           Y           Z        Dip. S.      Osc.
         1        -0.0115     -0.0645      0.0000      0.0043      0.0452
         2         0.0000      0.0000     -0.0002      0.0000      0.0000
         3        -0.0709      0.0131      0.0000      0.0052      0.0334
         4         0.0141      0.0631      0.0000      0.0042      0.0252
         5         0.2413     -0.0401      0.0000      0.0598      0.3472
 Ground to excited state transition magnetic dipole moments (Au):
       state          X           Y           Z
         1         0.0000      0.0000     -0.0750
         2        -0.0806     -0.3753     -0.0002
         3         0.0001      0.0002     -0.2641
         4         0.0000     -0.0001      0.2436
         5         0.0000      0.0001     -1.3656
 Ground to excited state transition velocity quadrupole moments (Au):
       state          XX          YY          ZZ          XY          XZ          YZ
         1        -0.1642     -0.0124      0.0002     -0.1396      0.0000      0.0000
         2        -0.0003      0.0000      0.0000      0.0000      0.0091     -0.0013
         3        -0.4361      0.0476      0.0005     -0.0852      0.0000      0.0000
         4         0.5703     -0.0976      0.0129      0.0639      0.0000      0.0000
         5         0.5519      0.1372     -0.0105     -0.3178      0.0000      0.0000
 <0|del|b> * <b|rxdel|0> + <0|del|b> * <b|delr+rdel|0>
 Rotatory Strengths (R) in cgs (10**-40 erg-esu-cm/Gauss)
       state          XX          YY          ZZ    R(velocity)    E-M Angle
         1        -0.0049     -0.0047      0.0005     -0.0030       90.00
         2        -0.0054      0.0134      0.0075      0.0052       90.00
         3         0.0126     -0.0121     -0.0043     -0.0013       90.00
         4        -0.0307     -0.0046     -0.0254     -0.0202       90.00
         5        -0.0162      0.0294      0.0232      0.0121       90.00
 1/2[<0|r|b>*<b|rxdel|0> + (<0|rxdel|b>*<b|r|0>)*]
 Rotatory Strengths (R) in cgs (10**-40 erg-esu-cm/Gauss)
       state          XX          YY          ZZ     R(length)
         1        -0.0012     -0.0131      0.0038     -0.0035
         2         0.0259     -0.0119      0.0001      0.0047
         3        -0.0258      0.0208      0.0020     -0.0010
         4        -0.0026     -0.0482     -0.0074     -0.0194
         5         0.0674     -0.0168     -0.0162      0.0115
  1/2[<0|del|b>*<b|r|0> + (<0|r|b>*<b|del|0>)*] (Au)
       state          X           Y           Z        Dip. S.   Osc.(frdel)
         1        -0.0016     -0.0534      0.0000      0.0550      0.0367
         2         0.0000      0.0000      0.0000      0.0000      0.0000
         3        -0.0469     -0.0017      0.0000      0.0486      0.0324
         4        -0.0017     -0.0367      0.0000      0.0384      0.0256
         5        -0.5084     -0.0138      0.0000      0.5223      0.3482

 Excitation energies and oscillator strengths:
 
 Excited State   1:  2.034-A      1.7229 eV  719.62 nm  f=0.0298  <S**2>=0.785
     72A -> 73A        0.98224
     69B -> 72B        0.12031
 This state for optimization and/or second-order correction.
 Total Energy, E(TD-HF/TD-KS) =  -3263.05473131    
 Copying the excited state density for this state as the 1-particle RhoCI density.
 
 Excited State   2:  2.318-A      2.4280 eV  510.64 nm  f=0.0000  <S**2>=1.093
     70A -> 73A       -0.12478
     71B -> 72B        0.93825
     71B -> 73B        0.28867
     71B -> 79B       -0.11848
 
 Excited State   3:  2.183-A      2.8253 eV  438.83 nm  f=0.0314  <S**2>=0.941
     72A -> 74A        0.68043
     72A -> 75A        0.13915
     68B -> 73B        0.10900
     69B -> 72B        0.13108
     70B -> 72B        0.63287
 
 Excited State   4:  2.359-A      3.0113 eV  411.73 nm  f=0.0261  <S**2>=1.141
     68A -> 73A       -0.18031
     69A -> 73A        0.12959
     72A -> 75A        0.34174
     67B -> 72B        0.10731
     68B -> 73B        0.13357
     69B -> 72B        0.77875
     69B -> 73B        0.11604
     70B -> 72B       -0.31274
 
 Excited State   5:  2.110-A      3.1270 eV  396.50 nm  f=0.3491  <S**2>=0.864
     71A -> 73A        0.10420
     72A -> 74A       -0.70340
     72A -> 75A        0.31765
     68B -> 73B        0.13756
     69B -> 72B        0.12730
     70B -> 72B        0.56478
 SavETr:  write IOETrn=   770 NScale= 10 NData=  16 NLR=1 NState=    5 LETran=      96.
          IDoAtm=1111111111111111111111111
 NEqPCM:  Using equilibrium solvation (IEInf=0, Eps=  35.6880, EpsInf=   1.8069)
          Differentiating once with respect to electric field.
                with respect to dipole field.
          Differentiating once with respect to nuclear coordinates.
          There are     1 degrees of freedom in the 1st order CPHF.  IDoFFX=0 NUNeed=     1.
 LinEq1:  Iter=  0 NonCon=     1 RMS=2.63D-03 Max=1.96D-01 NDo=     1
 AX will form     1 AO Fock derivatives at one time.
 LinEq1:  Iter=  1 NonCon=     1 RMS=1.86D-03 Max=1.58D-01 NDo=     1
 LinEq1:  Iter=  2 NonCon=     1 RMS=1.01D-03 Max=6.66D-02 NDo=     1
 LinEq1:  Iter=  3 NonCon=     1 RMS=7.51D-04 Max=3.14D-02 NDo=     1
 LinEq1:  Iter=  4 NonCon=     1 RMS=5.57D-04 Max=2.44D-02 NDo=     1
 LinEq1:  Iter=  5 NonCon=     1 RMS=3.74D-04 Max=1.81D-02 NDo=     1
 LinEq1:  Iter=  6 NonCon=     1 RMS=3.04D-04 Max=1.71D-02 NDo=     1
 LinEq1:  Iter=  7 NonCon=     1 RMS=2.02D-04 Max=1.34D-02 NDo=     1
 LinEq1:  Iter=  8 NonCon=     1 RMS=1.63D-04 Max=1.25D-02 NDo=     1
 LinEq1:  Iter=  9 NonCon=     1 RMS=7.99D-05 Max=3.78D-03 NDo=     1
 LinEq1:  Iter= 10 NonCon=     1 RMS=4.89D-05 Max=2.63D-03 NDo=     1
 LinEq1:  Iter= 11 NonCon=     1 RMS=2.79D-05 Max=1.03D-03 NDo=     1
 LinEq1:  Iter= 12 NonCon=     1 RMS=1.35D-05 Max=4.87D-04 NDo=     1
 LinEq1:  Iter= 13 NonCon=     1 RMS=1.06D-05 Max=4.62D-04 NDo=     1
 LinEq1:  Iter= 14 NonCon=     1 RMS=7.00D-06 Max=3.18D-04 NDo=     1
 LinEq1:  Iter= 15 NonCon=     1 RMS=4.08D-06 Max=1.97D-04 NDo=     1
 LinEq1:  Iter= 16 NonCon=     1 RMS=2.74D-06 Max=1.48D-04 NDo=     1
 LinEq1:  Iter= 17 NonCon=     1 RMS=1.76D-06 Max=6.24D-05 NDo=     1
 LinEq1:  Iter= 18 NonCon=     1 RMS=8.87D-07 Max=3.90D-05 NDo=     1
 LinEq1:  Iter= 19 NonCon=     1 RMS=6.56D-07 Max=2.69D-05 NDo=     1
 LinEq1:  Iter= 20 NonCon=     1 RMS=3.93D-07 Max=2.30D-05 NDo=     1
 LinEq1:  Iter= 21 NonCon=     1 RMS=2.00D-07 Max=9.08D-06 NDo=     1
 LinEq1:  Iter= 22 NonCon=     1 RMS=1.38D-07 Max=4.91D-06 NDo=     1
 LinEq1:  Iter= 23 NonCon=     1 RMS=7.37D-08 Max=2.43D-06 NDo=     1
 LinEq1:  Iter= 24 NonCon=     1 RMS=4.63D-08 Max=1.38D-06 NDo=     1
 LinEq1:  Iter= 25 NonCon=     1 RMS=2.57D-08 Max=9.54D-07 NDo=     1
 LinEq1:  Iter= 26 NonCon=     1 RMS=1.76D-08 Max=5.65D-07 NDo=     1
 LinEq1:  Iter= 27 NonCon=     1 RMS=7.56D-09 Max=3.54D-07 NDo=     1
 LinEq1:  Iter= 28 NonCon=     1 RMS=3.44D-09 Max=1.14D-07 NDo=     1
 LinEq1:  Iter= 29 NonCon=     1 RMS=2.59D-09 Max=9.64D-08 NDo=     1
 LinEq1:  Iter= 30 NonCon=     1 RMS=9.12D-10 Max=3.12D-08 NDo=     1
 LinEq1:  Iter= 31 NonCon=     1 RMS=3.56D-10 Max=1.44D-08 NDo=     1
 LinEq1:  Iter= 32 NonCon=     1 RMS=2.31D-10 Max=1.03D-08 NDo=     1
 LinEq1:  Iter= 33 NonCon=     1 RMS=8.82D-11 Max=2.83D-09 NDo=     1
 LinEq1:  Iter= 34 NonCon=     0 RMS=2.99D-11 Max=9.57D-10 NDo=     1
 Linear equations converged to 1.000D-10 1.000D-09 after    34 iterations.
 End of Minotr F.D. properties file   721 does not exist.
 End of Minotr F.D. properties file   722 does not exist.
 End of Minotr F.D. properties file   788 does not exist.
 D1PCM: PCM CHGder 1st derivatives, ID1Alg=3 FixD1E=F DoIter=F DoCFld=F I1PDM=6.
 Calling FoFJK, ICntrl=  10005127 FMM=F ISym2X=0 I1Cent= 0 IOpClX= 1 NMat=1 NMatS=1 NMatT=0.
 ***** Axes restored to original set *****
 -------------------------------------------------------------------
 Center     Atomic                   Forces (Hartrees/Bohr)
 Number     Number              X              Y              Z
 -------------------------------------------------------------------
      1        6           0.000015730    0.000202040    0.000002610
      2        6          -0.000177586   -0.000044991   -0.000004219
      3        6           0.000464925    0.000056285    0.000000562
      4        6           0.000104725    0.000164481    0.000020700
      5        6          -0.000043644    0.000086413    0.000002485
      6        6           0.000015979   -0.000152314   -0.000001213
      7        1          -0.000008488   -0.000041348    0.000000728
      8        1           0.000016988    0.000028511   -0.000003653
      9        1           0.000020950   -0.000018130   -0.000000047
     10        1          -0.000000238    0.000016633   -0.000000663
     11        6          -0.000046933   -0.000147792   -0.000114906
     12        8           0.000018831    0.000102231    0.000049039
     13        6          -0.000188427    0.000029859    0.000040387
     14        6           0.000155425    0.000012219    0.000022453
     15        6          -0.000157708   -0.000150892    0.000006321
     16        6          -0.000200406    0.000242956   -0.000000791
     17        6           0.000512106   -0.000134260   -0.000003484
     18        6           0.000195357   -0.000269832    0.000001526
     19        1           0.000035551   -0.000033892   -0.000000410
     20        6          -0.000393884    0.000262447    0.000002496
     21        1          -0.000045612   -0.000011524   -0.000006482
     22        1           0.000020279   -0.000012498    0.000000144
     23       35          -0.000054527    0.000058223   -0.000000809
     24        8          -0.000262780   -0.000122710   -0.000011322
     25        1           0.000003387   -0.000122115   -0.000001451
 -------------------------------------------------------------------
 Cartesian Forces:  Max     0.000512106 RMS     0.000134434

 GradGradGradGradGradGradGradGradGradGradGradGradGradGradGradGradGradGrad
 Berny optimization.
 Using GEDIIS/GDIIS optimizer.
 FormGI is forming the generalized inverse of G from B-inverse, IUseBI=4.
 Internal  Forces:  Max     0.000467777 RMS     0.000078072
 Search for a local minimum.
 Step number   5 out of a maximum of  146
 All quantities printed in internal units (Hartrees-Bohrs-Radians)
 Mixed Optimization -- En-DIIS/RFO-DIIS
 Swapping is turned off.
 Update second derivatives using D2CorX and points    1    2    3    4    5
 DE= -1.30D-05 DEPred=-1.48D-05 R= 8.78D-01
 TightC=F SS=  1.41D+00  RLast= 9.96D-03 DXNew= 8.4853D-01 2.9889D-02
 Trust test= 8.78D-01 RLast= 9.96D-03 DXMaxT set to 5.05D-01
 ITU=  1  1  1  1  0
     Eigenvalues ---    0.00890   0.00899   0.01247   0.01538   0.01565
     Eigenvalues ---    0.01672   0.01730   0.01795   0.01857   0.02148
     Eigenvalues ---    0.02148   0.02160   0.02164   0.02168   0.02170
     Eigenvalues ---    0.02177   0.02184   0.02190   0.02193   0.02199
     Eigenvalues ---    0.02216   0.04043   0.15195   0.15733   0.16000
     Eigenvalues ---    0.16000   0.16000   0.16012   0.16077   0.16712
     Eigenvalues ---    0.17684   0.21230   0.22001   0.22466   0.22619
     Eigenvalues ---    0.23233   0.24461   0.24786   0.24921   0.25000
     Eigenvalues ---    0.25020   0.25150   0.28885   0.31705   0.32370
     Eigenvalues ---    0.33066   0.35473   0.35478   0.35592   0.35615
     Eigenvalues ---    0.35663   0.35704   0.35765   0.38864   0.40450
     Eigenvalues ---    0.41464   0.42297   0.42915   0.44450   0.44741
     Eigenvalues ---    0.45731   0.45988   0.46472   0.46790   0.47336
     Eigenvalues ---    0.50450   0.56114   0.65933   0.94840
 En-DIIS/RFO-DIIS IScMMF=        0 using points:     5    4
 RFO step:  Lambda=-1.36839021D-06.
 DidBck=F Rises=F RFO-DIIS coefs:    0.91677    0.08323
 Iteration  1 RMS(Cart)=  0.00063395 RMS(Int)=  0.00000047
 Iteration  2 RMS(Cart)=  0.00000047 RMS(Int)=  0.00000026
 Variable       Old X    -DE/DX   Delta X   Delta X   Delta X     New X
                                 (Linear)    (Quad)   (Total)
    R1        2.65725  -0.00010   0.00011  -0.00040  -0.00029   2.65696
    R2        2.61580   0.00009  -0.00005   0.00029   0.00024   2.61604
    R3        2.04702   0.00000  -0.00002   0.00003   0.00001   2.04703
    R4        2.64050   0.00013   0.00003   0.00022   0.00025   2.64075
    R5        2.04423   0.00003  -0.00003   0.00013   0.00010   2.04433
    R6        2.68412  -0.00016  -0.00003  -0.00033  -0.00036   2.68376
    R7        2.72289  -0.00047  -0.00006  -0.00114  -0.00120   2.72170
    R8        2.62888   0.00002   0.00005  -0.00004   0.00001   2.62889
    R9        2.78199  -0.00003  -0.00003  -0.00001  -0.00004   2.78195
   R10        2.66053   0.00002   0.00002  -0.00002   0.00000   2.66053
   R11        2.04462   0.00002   0.00001   0.00003   0.00004   2.04466
   R12        2.04986  -0.00001   0.00001  -0.00005  -0.00004   2.04982
   R13        2.36705  -0.00010  -0.00005  -0.00004  -0.00009   2.36695
   R14        2.76579  -0.00001  -0.00009   0.00021   0.00012   2.76592
   R15        2.72215   0.00011   0.00013   0.00001   0.00014   2.72229
   R16        2.48287  -0.00017  -0.00023   0.00011  -0.00012   2.48275
   R17        2.69353  -0.00007  -0.00009   0.00001  -0.00009   2.69345
   R18        2.64237  -0.00013   0.00013  -0.00049  -0.00037   2.64201
   R19        2.64055   0.00013   0.00011   0.00003   0.00014   2.64069
   R20        2.66153  -0.00005   0.00002  -0.00014  -0.00013   2.66140
   R21        2.04052   0.00005   0.00001   0.00011   0.00011   2.04064
   R22        2.67643  -0.00031   0.00013  -0.00087  -0.00074   2.67569
   R23        2.04949  -0.00001  -0.00006   0.00009   0.00003   2.04952
   R24        2.60017   0.00012  -0.00008   0.00041   0.00033   2.60050
   R25        3.61613  -0.00007   0.00004  -0.00042  -0.00038   3.61575
   R26        2.04263   0.00000  -0.00001   0.00004   0.00002   2.04265
   R27        1.82929  -0.00007  -0.00002  -0.00008  -0.00010   1.82919
    A1        2.08482  -0.00005   0.00000  -0.00018  -0.00018   2.08463
    A2        2.09143   0.00006   0.00003   0.00023   0.00026   2.09169
    A3        2.10694  -0.00001  -0.00003  -0.00005  -0.00008   2.10686
    A4        2.09449   0.00002  -0.00005   0.00017   0.00012   2.09461
    A5        2.09848   0.00002   0.00004   0.00005   0.00009   2.09857
    A6        2.09021  -0.00004   0.00000  -0.00021  -0.00021   2.09001
    A7        2.10462   0.00005   0.00004   0.00009   0.00014   2.10476
    A8        2.11281  -0.00014   0.00003  -0.00052  -0.00049   2.11232
    A9        2.06576   0.00009  -0.00008   0.00043   0.00035   2.06611
   A10        2.07057  -0.00006  -0.00001  -0.00024  -0.00024   2.07032
   A11        2.10591   0.00004   0.00007   0.00001   0.00008   2.10599
   A12        2.10671   0.00003  -0.00006   0.00023   0.00017   2.10688
   A13        2.10225   0.00006  -0.00002   0.00026   0.00024   2.10248
   A14        2.07100  -0.00004  -0.00002  -0.00014  -0.00016   2.07084
   A15        2.10994  -0.00002   0.00004  -0.00011  -0.00007   2.10987
   A16        2.10963  -0.00001   0.00004  -0.00010  -0.00007   2.10956
   A17        2.09268  -0.00002  -0.00001  -0.00011  -0.00011   2.09256
   A18        2.08088   0.00003  -0.00003   0.00021   0.00018   2.08106
   A19        2.10641   0.00008   0.00004   0.00021   0.00025   2.10666
   A20        2.06923  -0.00007  -0.00004  -0.00022  -0.00026   2.06898
   A21        2.10754   0.00000  -0.00001   0.00002   0.00001   2.10755
   A22        2.15407  -0.00001   0.00006  -0.00024  -0.00018   2.15389
   A23        2.00796  -0.00028  -0.00039  -0.00012  -0.00051   2.00745
   A24        2.12115   0.00029   0.00033   0.00036   0.00069   2.12185
   A25        2.11748  -0.00004   0.00008  -0.00022  -0.00014   2.11734
   A26        2.08947   0.00001  -0.00014   0.00028   0.00014   2.08961
   A27        2.07624   0.00002   0.00006  -0.00006   0.00000   2.07624
   A28        2.05392   0.00000  -0.00009   0.00024   0.00016   2.05408
   A29        2.13269   0.00011   0.00013   0.00005   0.00017   2.13287
   A30        2.09657  -0.00011  -0.00004  -0.00029  -0.00033   2.09624
   A31        2.08154   0.00008  -0.00005   0.00042   0.00037   2.08191
   A32        2.07964  -0.00002  -0.00002   0.00000  -0.00002   2.07962
   A33        2.12200  -0.00006   0.00007  -0.00042  -0.00034   2.12165
   A34        2.10994   0.00009  -0.00001   0.00035   0.00034   2.11028
   A35        2.13493  -0.00009   0.00020  -0.00086  -0.00066   2.13427
   A36        2.03832   0.00000  -0.00019   0.00052   0.00032   2.03864
   A37        2.14485  -0.00010   0.00004  -0.00048  -0.00044   2.14441
   A38        2.05887   0.00010  -0.00001   0.00040   0.00039   2.05926
   A39        2.07946   0.00001  -0.00003   0.00008   0.00005   2.07951
   A40        2.05723   0.00002   0.00000   0.00007   0.00006   2.05729
   A41        2.10070   0.00002   0.00008   0.00001   0.00010   2.10079
   A42        2.12526  -0.00004  -0.00008  -0.00008  -0.00016   2.12510
   A43        1.97735  -0.00019   0.00007  -0.00128  -0.00120   1.97615
    D1        0.00001   0.00000   0.00000  -0.00004  -0.00004  -0.00003
    D2        3.14158   0.00000   0.00000   0.00003   0.00003  -3.14158
    D3       -3.14157   0.00000   0.00000  -0.00006  -0.00006   3.14155
    D4       -0.00001   0.00000   0.00000   0.00001   0.00001   0.00001
    D5        0.00002   0.00000   0.00000  -0.00004  -0.00005  -0.00003
    D6       -3.14159   0.00000   0.00000   0.00001   0.00001  -3.14158
    D7       -3.14158   0.00000   0.00000  -0.00003  -0.00003   3.14157
    D8       -0.00001   0.00000   0.00000   0.00003   0.00003   0.00002
    D9       -0.00008   0.00000   0.00001   0.00017   0.00018   0.00011
   D10        3.14147   0.00000   0.00001   0.00026   0.00028  -3.14144
   D11        3.14155   0.00000   0.00001   0.00010   0.00011  -3.14153
   D12       -0.00009   0.00000   0.00001   0.00019   0.00020   0.00011
   D13        0.00010  -0.00001  -0.00002  -0.00021  -0.00023  -0.00013
   D14       -3.14147  -0.00001  -0.00002  -0.00030  -0.00032   3.14140
   D15       -3.14144  -0.00001  -0.00002  -0.00030  -0.00032   3.14142
   D16        0.00016  -0.00001  -0.00002  -0.00039  -0.00041  -0.00024
   D17        3.14157   0.00000   0.00000  -0.00027  -0.00027   3.14129
   D18        0.00025  -0.00001  -0.00005  -0.00051  -0.00056  -0.00031
   D19       -0.00007   0.00000   0.00000  -0.00019  -0.00018  -0.00025
   D20       -3.14139  -0.00001  -0.00005  -0.00042  -0.00047   3.14133
   D21       -0.00007   0.00000   0.00001   0.00013   0.00014   0.00007
   D22        3.14156   0.00000   0.00000   0.00003   0.00003  -3.14159
   D23        3.14151   0.00000   0.00001   0.00022   0.00023  -3.14145
   D24       -0.00005   0.00000   0.00001   0.00012   0.00012   0.00007
   D25       -3.14076  -0.00002  -0.00010  -0.00230  -0.00240   3.14002
   D26       -0.00027   0.00001   0.00003   0.00092   0.00095   0.00068
   D27        0.00085  -0.00003  -0.00010  -0.00239  -0.00249  -0.00164
   D28        3.14134   0.00001   0.00003   0.00083   0.00086  -3.14098
   D29        0.00001   0.00000   0.00000   0.00000   0.00000   0.00001
   D30       -3.14157   0.00000   0.00000  -0.00005  -0.00006   3.14156
   D31        3.14156   0.00000   0.00000   0.00010   0.00011  -3.14152
   D32       -0.00001   0.00000   0.00000   0.00005   0.00005   0.00004
   D33        0.00029  -0.00001  -0.00003  -0.00091  -0.00094  -0.00066
   D34       -3.14136  -0.00001  -0.00003  -0.00077  -0.00080   3.14103
   D35        3.14078   0.00002   0.00010   0.00231   0.00241  -3.14000
   D36       -0.00087   0.00003   0.00011   0.00245   0.00256   0.00168
   D37        0.00008   0.00000   0.00000   0.00020   0.00020   0.00028
   D38       -3.14151   0.00000  -0.00001   0.00020   0.00019  -3.14132
   D39        3.14139   0.00001   0.00005   0.00045   0.00050  -3.14130
   D40       -0.00021   0.00001   0.00005   0.00044   0.00049   0.00028
   D41        3.14148   0.00000   0.00003   0.00013   0.00016  -3.14154
   D42        0.00016   0.00000  -0.00002  -0.00009  -0.00012   0.00004
   D43       -0.00019   0.00001   0.00002   0.00037   0.00038   0.00019
   D44        3.14140   0.00001   0.00002   0.00037   0.00039  -3.14140
   D45        3.14146   0.00000   0.00001   0.00023   0.00024  -3.14149
   D46       -0.00014   0.00001   0.00002   0.00023   0.00025   0.00011
   D47       -3.14147   0.00000  -0.00001  -0.00024  -0.00025   3.14146
   D48        0.00008   0.00000  -0.00001  -0.00015  -0.00015  -0.00007
   D49        0.00007   0.00000  -0.00001  -0.00010  -0.00011  -0.00004
   D50       -3.14157   0.00000   0.00000  -0.00001  -0.00001  -3.14158
   D51       -3.14147   0.00000  -0.00001  -0.00021  -0.00022   3.14149
   D52        0.00014   0.00000  -0.00001  -0.00018  -0.00019  -0.00005
   D53        0.00012  -0.00001  -0.00002  -0.00021  -0.00023  -0.00011
   D54       -3.14146  -0.00001  -0.00001  -0.00019  -0.00020   3.14153
   D55        0.00003   0.00000   0.00000  -0.00005  -0.00005  -0.00003
   D56        3.14156   0.00000   0.00000   0.00006   0.00006  -3.14156
   D57       -3.14153   0.00000  -0.00001  -0.00014  -0.00015   3.14151
   D58        0.00001   0.00000   0.00000  -0.00003  -0.00003  -0.00002
   D59       -0.00003   0.00000   0.00000   0.00006   0.00007   0.00004
   D60        3.14157   0.00000   0.00000   0.00005   0.00005  -3.14156
   D61        3.14155   0.00000   0.00000   0.00004   0.00004   3.14159
   D62       -0.00004   0.00000   0.00000   0.00002   0.00002  -0.00001
   D63       -0.00004   0.00000   0.00000   0.00007   0.00007   0.00003
   D64        3.14154   0.00000   0.00001   0.00009   0.00009  -3.14155
   D65       -3.14158   0.00000   0.00000  -0.00004  -0.00004   3.14156
   D66        0.00001   0.00000   0.00000  -0.00003  -0.00003  -0.00002
         Item               Value     Threshold  Converged?
 Maximum Force            0.000468     0.000450     NO 
 RMS     Force            0.000078     0.000300     YES
 Maximum Displacement     0.002394     0.001800     NO 
 RMS     Displacement     0.000634     0.001200     YES
 Predicted change in Energy=-1.276584D-06
 GradGradGradGradGradGradGradGradGradGradGradGradGradGradGradGradGradGrad

                          Input orientation:                          
 ---------------------------------------------------------------------
 Center     Atomic      Atomic             Coordinates (Angstroms)
 Number     Number       Type             X           Y           Z
 ---------------------------------------------------------------------
      1          6           0       -5.094146    0.066651    0.000213
      2          6           0       -4.037896    0.994647    0.000010
      3          6           0       -2.714131    0.546939   -0.000237
      4          6           0       -2.421093   -0.842685   -0.000416
      5          6           0       -3.478480   -1.746692   -0.000188
      6          6           0       -4.809605   -1.288142    0.000129
      7          1           0       -6.119272    0.416690    0.000440
      8          1           0       -4.245474    2.056358    0.000085
      9          1           0       -3.255770   -2.805509   -0.000322
     10          1           0       -5.618788   -2.010521    0.000274
     11          6           0       -1.027124   -1.316042   -0.000925
     12          8           0       -0.767848   -2.541450    0.000605
     13          6           0       -1.615482    1.478239   -0.000258
     14          6           0        0.048538   -0.323444   -0.000365
     15          6           0       -0.232839    1.073818   -0.000147
     16          6           0        1.381377   -0.745575   -0.000143
     17          6           0        0.813881    1.999606    0.000150
     18          6           0        2.409008    0.217458    0.000238
     19          1           0        1.598137   -1.803454   -0.000319
     20          6           0        2.163528    1.571514    0.000372
     21          1           0        0.640347    3.070190    0.000263
     22          1           0        2.966368    2.295286    0.000627
     23         35           0        4.219528   -0.401420    0.000478
     24          8           0       -1.961471    2.745679   -0.000402
     25          1           0       -1.203866    3.348168   -0.000460
 ---------------------------------------------------------------------
                    Distance matrix (angstroms):
                    1          2          3          4          5
     1  C    0.000000
     2  C    1.406002   0.000000
     3  C    2.427992   1.397426   0.000000
     4  C    2.823491   2.447416   1.420184   0.000000
     5  C    2.428701   2.797837   2.417638   1.391150   0.000000
     6  C    1.384351   2.409702   2.785415   2.429696   1.407892
     7  H    1.083241   2.160130   3.407632   3.906732   3.413796
     8  H    2.163141   1.081812   2.150200   3.425320   3.879623
     9  H    3.410122   3.879808   3.395921   2.132924   1.081986
    10  H    2.142404   3.395624   3.870095   3.404277   2.156507
    11  C    4.295638   3.795265   2.513302   1.472147   2.488897
    12  O    5.051637   4.816347   3.650501   2.370448   2.824742
    13  C    3.754156   2.470213   1.440261   2.456766   3.724372
    14  C    5.157457   4.293752   2.896533   2.523625   3.803353
    15  C    4.964543   3.805881   2.536614   2.908855   4.299938
    16  C    6.526263   5.691827   4.294622   3.803710   4.961900
    17  C    6.216196   4.954764   3.815378   4.306237   5.697291
    18  C    7.504669   6.493581   5.133722   4.945076   6.206481
    19  H    6.948665   6.292396   4.911212   4.132467   5.076935
    20  C    7.412047   6.228197   4.984106   5.181419   6.545438
    21  H    6.473458   5.117991   4.197537   4.968199   6.337752
    22  H    8.362936   7.124000   5.943466   6.234709   7.607474
    23  Br   9.325428   8.374608   6.998214   6.655265   7.814671
    24  O    4.121995   2.716184   2.323996   3.617680   4.741595
    25  H    5.089462   3.683854   3.182418   4.364044   5.579558
                    6          7          8          9         10
     6  C    0.000000
     7  H    2.149810   0.000000
     8  H    3.391744   2.489906   0.000000
     9  H    2.171821   4.310709   4.961579   0.000000
    10  H    1.084716   2.478273   4.292494   2.493163   0.000000
    11  C    3.782584   5.378878   4.661637   2.680554   4.643886
    12  O    4.231616   6.114600   5.764870   2.501895   4.879908
    13  C    4.225552   4.627204   2.692783   4.587052   5.310171
    14  C    4.952998   6.212059   4.909378   4.132686   5.913105
    15  C    5.150305   5.922999   4.131177   4.918057   6.206577
    16  C    6.214711   7.590165   6.285880   5.074097   7.113537
    17  C    6.514053   7.111557   5.059674   6.296919   7.580261
    18  C    7.373954   8.530606   6.903889   6.420906   8.331230
    19  H    6.428429   8.030407   7.003281   4.956261   7.219895
    20  C    7.536725   8.362918   6.427316   6.966141   8.567113
    21  H    6.978326   7.261784   4.989900   7.050076   8.061663
    22  H    8.561934   9.277822   7.215799   8.045689   9.604420
    23  Br   9.072569  10.371118   8.814586   7.852370   9.969036
    24  O    4.937974   4.765659   2.385756   5.700079   5.999784
    25  H    5.873391   5.723179   3.304565   6.486759   6.943132
                   11         12         13         14         15
    11  C    0.000000
    12  O    1.252538   0.000000
    13  C    2.855551   4.108088   0.000000
    14  C    1.463660   2.363480   2.452554   0.000000
    15  C    2.518396   3.654640   1.440575   1.425311   0.000000
    16  C    2.475139   2.800775   3.731824   1.398090   2.432259
    17  C    3.792470   4.808644   2.484679   2.445876   1.397393
    18  C    3.762795   4.207611   4.217355   2.421651   2.777176
    19  H    2.670125   2.478412   4.593131   2.142823   3.410449
    20  C    4.303284   5.050688   3.780161   2.839727   2.447505
    21  H    4.692494   5.785631   2.760991   3.444850   2.178981
    22  H    5.384206   6.110514   4.654128   3.920648   3.424458
    23  Br   5.325777   5.427122   6.130290   4.171719   4.690405
    24  O    4.167804   5.420191   1.313816   3.668740   2.404848
    25  H    4.667558   5.905735   1.914696   3.879336   2.472966
                   16         17         18         19         20
    16  C    0.000000
    17  C    2.803225   0.000000
    18  C    1.408352   2.391752   0.000000
    19  H    1.079858   3.883082   2.177521   0.000000
    20  C    2.445539   1.415913   1.376128   3.421999   0.000000
    21  H    3.887054   1.084557   3.356522   4.966868   2.136846
    22  H    3.429144   2.172700   2.151283   4.321079   1.080924
    23  Br   2.858941   4.166936   1.913372   2.972775   2.849492
    24  O    4.833579   2.873884   5.049058   5.776281   4.288856
    25  H    4.841716   2.426917   4.780607   5.864335   3.807341
                   21         22         23         24         25
    21  H    0.000000
    22  H    2.451704   0.000000
    23  Br   4.986243   2.973656   0.000000
    24  O    2.621977   4.948379   6.936064   0.000000
    25  H    1.865045   4.301095   6.593376   0.967966   0.000000
 Stoichiometry    C14H8BrO2(2)
 Framework group  C1[X(C14H8BrO2)]
 Deg. of freedom    69
 Full point group                 C1      NOp   1
 Largest Abelian subgroup         C1      NOp   1
 Largest concise Abelian subgroup C1      NOp   1
                         Standard orientation:                         
 ---------------------------------------------------------------------
 Center     Atomic      Atomic             Coordinates (Angstroms)
 Number     Number       Type             X           Y           Z
 ---------------------------------------------------------------------
      1          6           0        5.086808    0.025820   -0.000146
      2          6           0        4.035125    0.958989    0.000057
      3          6           0        2.709179    0.517782    0.000303
      4          6           0        2.409325   -0.870387    0.000482
      5          6           0        3.462263   -1.779573    0.000254
      6          6           0        4.795622   -1.327561   -0.000062
      7          1           0        6.113640    0.370824   -0.000373
      8          1           0        4.247911    2.019668   -0.000018
      9          1           0        3.234359   -2.837284    0.000389
     10          1           0        5.601251   -2.053902   -0.000207
     11          6           0        1.013050   -1.336898    0.000992
     12          8           0        0.747763   -2.561018   -0.000539
     13          6           0        1.615113    1.454463    0.000324
     14          6           0       -0.057728   -0.339032    0.000432
     15          6           0        0.230502    1.056831    0.000214
     16          6           0       -1.392623   -0.754617    0.000209
     17          6           0       -0.811662    1.987746   -0.000083
     18          6           0       -2.415515    0.213447   -0.000172
     19          1           0       -1.614572   -1.811420    0.000386
     20          6           0       -2.163394    1.566282   -0.000305
     21          1           0       -0.632876    3.057465   -0.000197
     22          1           0       -2.962672    2.293985   -0.000561
     23         35           0       -4.229050   -0.396539   -0.000411
     24          8           0        1.967318    2.720190    0.000469
     25          1           0        1.212679    3.326389    0.000527
 ---------------------------------------------------------------------
 Rotational constants (GHZ):      0.9922269      0.1761319      0.1495797
 Standard basis: 6-311G(d) (5D, 7F)
 There are   375 symmetry adapted cartesian basis functions of A   symmetry.
 There are   356 symmetry adapted basis functions of A   symmetry.
   356 basis functions,   642 primitive gaussians,   375 cartesian basis functions
    72 alpha electrons       71 beta electrons
       nuclear repulsion energy      1392.1036071179 Hartrees.
 NAtoms=   25 NActive=   25 NUniq=   25 SFac= 1.00D+00 NAtFMM=   60 NAOKFM=F Big=F
 Integral buffers will be    262144 words long.
 Raffenetti 2 integral format.
 Two-electron integral symmetry is turned on.
 Nuclear repulsion after empirical dispersion term =     1392.0402794765 Hartrees.
 ------------------------------------------------------------------------------
 Polarizable Continuum Model (PCM)
 =================================
 Model                : PCM (using non-symmetric T matrix).
 Atomic radii         : UFF (Universal Force Field).
 Polarization charges : Total charges.
 Charge compensation  : None.
 Solution method      : On-the-fly selection.
 Cavity type          : Scaled VdW (van der Waals Surface) (Alpha=1.100).
 Cavity algorithm     : GePol (No added spheres)
                        Default sphere list used, NSphG=   25.
                        Lebedev-Laikov grids with approx.  5.0 points / Ang**2.
                        Smoothing algorithm: Karplus/York (Gamma=1.0000).
                        Polarization charges: spherical gaussians, with
                                              point-specific exponents (IZeta= 3).
                        Self-potential: point-specific (ISelfS= 7).
                        Self-field    : sphere-specific E.n sum rule (ISelfD= 2).
 1st derivatives      : Analytical E(r).r(x)/FMM algorithm (CHGder, D1EAlg=3).
                        Cavity 1st derivative terms included.
 Solvent              : Acetonitrile, Eps=  35.688000 Eps(inf)=   1.806874
 ------------------------------------------------------------------------------
 One-electron integrals computed using PRISM.
 NBasis=   356 RedAO= T EigKep=  8.65D-05  NBF=   356
 NBsUse=   356 1.00D-06 EigRej= -1.00D+00 NBFU=   356
 Initial guess from the checkpoint file:  "C:\Users\Shengfu Liao\Desktop\suppliment.chk"
 B after Tr=     0.000000    0.000000    0.000000
         Rot=    1.000000   -0.000039    0.000030    0.000024 Ang=  -0.01 deg.
 Initial guess <Sx>= 0.0000 <Sy>= 0.0000 <Sz>= 0.5000 <S**2>= 0.7725 S= 0.5112
 Requested convergence on RMS density matrix=1.00D-08 within 128 cycles.
 Requested convergence on MAX density matrix=1.00D-06.
 Requested convergence on             energy=1.00D-06.
 No special actions if energy rises.
 Inv3:  Mode=1 IEnd=    14454075.
 Iteration    1 A*A^-1 deviation from unit magnitude is 3.22D-15 for   1096.
 Iteration    1 A*A^-1 deviation from orthogonality  is 2.97D-15 for   1473   1268.
 Iteration    1 A^-1*A deviation from unit magnitude is 2.44D-15 for   1386.
 Iteration    1 A^-1*A deviation from orthogonality  is 4.04D-12 for   2031   1477.
 Error on total polarization charges =  0.01435
 SCF Done:  E(UB3LYP) =  -3263.11810040     A.U. after   10 cycles
            NFock= 10  Conv=0.56D-08     -V/T= 2.0018
 <Sx>= 0.0000 <Sy>= 0.0000 <Sz>= 0.5000 <S**2>= 0.7725 S= 0.5112
 <L.S>= 0.000000000000E+00
 Annihilation of the first spin contaminant:
 S**2 before annihilation     0.7725,   after     0.7504
 DoSCS=F DFT=T ScalE2(SS,OS)=  1.000000  1.000000
 ExpMin= 1.03D-01 ExpMax= 4.40D+05 ExpMxC= 1.51D+04 IAcc=3 IRadAn=         5 AccDes= 0.00D+00
 HarFok:  IExCor=  205 AccDes= 0.00D+00 IRadAn=         5 IDoV=-2 UseB2=F ITyADJ=14
 ICtDFT= 12500011 ScaDFX=  1.000000  1.000000  1.000000  1.000000
 Range of M.O.s used for correlation:    31   356
 NBasis=   356 NAE=    72 NBE=    71 NFC=    30 NFV=     0
 NROrb=    326 NOA=    42 NOB=    41 NVA=   284 NVB=   285

 **** Warning!!: The largest alpha MO coefficient is  0.25023106D+02


 **** Warning!!: The smallest alpha delta epsilon is  0.97249110D-01


 **** Warning!!: The largest beta MO coefficient is  0.23820109D+02

 Ignoring spin specification with unrestricted ground state.
 NEqPCM:  Using equilibrium solvation (IEInf=0, Eps=  35.6880, EpsInf=   1.8069)
 Orbital symmetries:
 Alpha Orbitals:
       Occupied  (A) (A) (A) (A) (A) (A) (A) (A) (A) (A) (A) (A)
                 (A) (A) (A) (A) (A) (A) (A) (A) (A) (A) (A) (A)
                 (A) (A) (A) (A) (A) (A) (A) (A) (A) (A) (A) (A)
                 (A) (A) (A) (A) (A) (A) (A) (A) (A) (A) (A) (A)
                 (A) (A) (A) (A) (A) (A) (A) (A) (A) (A) (A) (A)
                 (A) (A) (A) (A) (A) (A) (A) (A) (A) (A) (A) (A)
       Virtual   (A) (A) (A) (A) (A) (A) (A) (A) (A) (A) (A) (A)
                 (A) (A) (A) (A) (A) (A) (A) (A) (A) (A) (A) (A)
                 (A) (A) (A) (A) (A) (A) (A) (A) (A) (A) (A) (A)
                 (A) (A) (A) (A) (A) (A) (A) (A) (A) (A) (A) (A)
                 (A) (A) (A) (A) (A) (A) (A) (A) (A) (A) (A) (A)
                 (A) (A) (A) (A) (A) (A) (A) (A) (A) (A) (A) (A)
                 (A) (A) (A) (A) (A) (A) (A) (A) (A) (A) (A) (A)
                 (A) (A) (A) (A) (A) (A) (A) (A) (A) (A) (A) (A)
                 (A) (A) (A) (A) (A) (A) (A) (A) (A) (A) (A) (A)
                 (A) (A) (A) (A) (A) (A) (A) (A) (A) (A) (A) (A)
                 (A) (A) (A) (A) (A) (A) (A) (A) (A) (A) (A) (A)
                 (A) (A) (A) (A) (A) (A) (A) (A) (A) (A) (A) (A)
                 (A) (A) (A) (A) (A) (A) (A) (A) (A) (A) (A) (A)
                 (A) (A) (A) (A) (A) (A) (A) (A) (A) (A) (A) (A)
                 (A) (A) (A) (A) (A) (A) (A) (A) (A) (A) (A) (A)
                 (A) (A) (A) (A) (A) (A) (A) (A) (A) (A) (A) (A)
                 (A) (A) (A) (A) (A) (A) (A) (A) (A) (A) (A) (A)
                 (A) (A) (A) (A) (A) (A) (A) (A) (A) (A) (A) (A)
                 (A) (A) (A) (A) (A) (A) (A) (A) (A) (A) (A) (A)
                 (A) (A) (A) (A) (A) (A) (A) (A) (A) (A) (A) (A)
                 (A) (A) (A) (A) (A) (A) (A) (A) (A) (A) (A) (A)
                 (A) (A) (A) (A) (A) (A) (A) (A) (A) (A) (A) (A)
                 (A) (A) (A) (A) (A) (A) (A) (A) (A) (A) (A) (A)
                 (A) (A) (A) (A) (A) (A) (A) (A)
 Beta  Orbitals:
       Occupied  (A) (A) (A) (A) (A) (A) (A) (A) (A) (A) (A) (A)
                 (A) (A) (A) (A) (A) (A) (A) (A) (A) (A) (A) (A)
                 (A) (A) (A) (A) (A) (A) (A) (A) (A) (A) (A) (A)
                 (A) (A) (A) (A) (A) (A) (A) (A) (A) (A) (A) (A)
                 (A) (A) (A) (A) (A) (A) (A) (A) (A) (A) (A) (A)
                 (A) (A) (A) (A) (A) (A) (A) (A) (A) (A) (A)
       Virtual   (A) (A) (A) (A) (A) (A) (A) (A) (A) (A) (A) (A)
                 (A) (A) (A) (A) (A) (A) (A) (A) (A) (A) (A) (A)
                 (A) (A) (A) (A) (A) (A) (A) (A) (A) (A) (A) (A)
                 (A) (A) (A) (A) (A) (A) (A) (A) (A) (A) (A) (A)
                 (A) (A) (A) (A) (A) (A) (A) (A) (A) (A) (A) (A)
                 (A) (A) (A) (A) (A) (A) (A) (A) (A) (A) (A) (A)
                 (A) (A) (A) (A) (A) (A) (A) (A) (A) (A) (A) (A)
                 (A) (A) (A) (A) (A) (A) (A) (A) (A) (A) (A) (A)
                 (A) (A) (A) (A) (A) (A) (A) (A) (A) (A) (A) (A)
                 (A) (A) (A) (A) (A) (A) (A) (A) (A) (A) (A) (A)
                 (A) (A) (A) (A) (A) (A) (A) (A) (A) (A) (A) (A)
                 (A) (A) (A) (A) (A) (A) (A) (A) (A) (A) (A) (A)
                 (A) (A) (A) (A) (A) (A) (A) (A) (A) (A) (A) (A)
                 (A) (A) (A) (A) (A) (A) (A) (A) (A) (A) (A) (A)
                 (A) (A) (A) (A) (A) (A) (A) (A) (A) (A) (A) (A)
                 (A) (A) (A) (A) (A) (A) (A) (A) (A) (A) (A) (A)
                 (A) (A) (A) (A) (A) (A) (A) (A) (A) (A) (A) (A)
                 (A) (A) (A) (A) (A) (A) (A) (A) (A) (A) (A) (A)
                 (A) (A) (A) (A) (A) (A) (A) (A) (A) (A) (A) (A)
                 (A) (A) (A) (A) (A) (A) (A) (A) (A) (A) (A) (A)
                 (A) (A) (A) (A) (A) (A) (A) (A) (A) (A) (A) (A)
                 (A) (A) (A) (A) (A) (A) (A) (A) (A) (A) (A) (A)
                 (A) (A) (A) (A) (A) (A) (A) (A) (A) (A) (A) (A)
                 (A) (A) (A) (A) (A) (A) (A) (A) (A)
 Generating guess from densities on rwf.
 Convergence on wavefunction:    0.000001000000000
 Iteration     1 Dimension    10 NMult     0 NNew     10
 CISAX will form    10 AO SS matrices at one time.
 Iteration     2 Dimension    20 NMult    10 NNew     10
 Iteration     3 Dimension    30 NMult    20 NNew     10
 Iteration     4 Dimension    40 NMult    30 NNew     10
 Iteration     5 Dimension    50 NMult    40 NNew     10
 Iteration     6 Dimension    60 NMult    50 NNew     10
 Iteration     7 Dimension    70 NMult    60 NNew     10
 Iteration     8 Dimension    78 NMult    70 NNew      8
 Iteration     9 Dimension    82 NMult    78 NNew      4
 Iteration    10 Dimension    84 NMult    82 NNew      2
 Iteration    11 Dimension    86 NMult    84 NNew      2
 ***********************************************************************
 Excited states from <AA,BB:AA,BB> singles matrix:
 ***********************************************************************
 
 ExtSpn:  IState=     1 X2= 1.009 Y2= 0.009 X2-Y2-1=-3.66D-15
          S2Grnd=  0.772 Ra=  0.005 Rb=  0.007 T=  0.000 S2Ext=  0.012 S2=  0.785
 ExtSpn:  IState=     2 X2= 1.002 Y2= 0.002 X2-Y2-1=-3.33D-16
          S2Grnd=  0.772 Ra=  0.017 Rb=  0.189 T=  0.114 S2Ext=  0.320 S2=  1.092
 ExtSpn:  IState=     3 X2= 1.012 Y2= 0.012 X2-Y2-1= 6.66D-16
          S2Grnd=  0.772 Ra=  0.045 Rb=  0.042 T=  0.081 S2Ext=  0.168 S2=  0.940
 ExtSpn:  IState=     4 X2= 1.011 Y2= 0.011 X2-Y2-1=-4.44D-16
          S2Grnd=  0.772 Ra=  0.090 Rb=  0.098 T=  0.177 S2Ext=  0.365 S2=  1.138
 ExtSpn:  IState=     5 X2= 1.006 Y2= 0.006 X2-Y2-1=-5.11D-15
          S2Grnd=  0.772 Ra=  0.030 Rb=  0.042 T=  0.015 S2Ext=  0.087 S2=  0.859
 Ground to excited state transition densities written to RWF  633
 Ground to excited state transition electric dipole moments (Au):
       state          X           Y           Z        Dip. S.      Osc.
         1         0.1402      0.8282     -0.0001      0.7056      0.0298
         2        -0.0009      0.0001      0.0005      0.0000      0.0000
         3         0.6574     -0.1271      0.0000      0.4483      0.0310
         4        -0.1208     -0.5820      0.0000      0.3534      0.0261
         5        -2.1280      0.3373     -0.0001      4.6423      0.3556
 Ground to excited state transition velocity dipole moments (Au):
       state          X           Y           Z        Dip. S.      Osc.
         1        -0.0115     -0.0645      0.0000      0.0043      0.0452
         2         0.0001      0.0000     -0.0002      0.0000      0.0000
         3        -0.0705      0.0131      0.0000      0.0051      0.0330
         4         0.0140      0.0632      0.0000      0.0042      0.0252
         5         0.2438     -0.0392      0.0000      0.0610      0.3537
 Ground to excited state transition magnetic dipole moments (Au):
       state          X           Y           Z
         1        -0.0001      0.0000     -0.0757
         2        -0.0806     -0.3753      0.0003
         3        -0.0001     -0.0005     -0.2657
         4         0.0001      0.0002      0.2469
         5         0.0000     -0.0001     -1.3638
 Ground to excited state transition velocity quadrupole moments (Au):
       state          XX          YY          ZZ          XY          XZ          YZ
         1        -0.1647     -0.0122      0.0002     -0.1397      0.0000      0.0000
         2         0.0005     -0.0001      0.0000      0.0001      0.0091     -0.0013
         3        -0.4343      0.0475      0.0005     -0.0856      0.0000      0.0000
         4         0.5722     -0.0982      0.0129      0.0645      0.0000      0.0000
         5         0.5656      0.1358     -0.0104     -0.3165      0.0000      0.0000
 <0|del|b> * <b|rxdel|0> + <0|del|b> * <b|delr+rdel|0>
 Rotatory Strengths (R) in cgs (10**-40 erg-esu-cm/Gauss)
       state          XX          YY          ZZ    R(velocity)    E-M Angle
         1        -0.0180      0.0166     -0.0092     -0.0035       90.00
         2         0.0141     -0.0275     -0.0128     -0.0087       90.00
         3        -0.0187      0.0280      0.0026      0.0040       90.00
         4         0.0483      0.0043      0.0523      0.0350       90.00
         5        -0.0493     -0.0321      0.0271     -0.0181       90.00
 1/2[<0|r|b>*<b|rxdel|0> + (<0|rxdel|b>*<b|r|0>)*]
 Rotatory Strengths (R) in cgs (10**-40 erg-esu-cm/Gauss)
       state          XX          YY          ZZ     R(length)
         1         0.0120     -0.0095     -0.0075     -0.0017
         2        -0.0538      0.0290     -0.0001     -0.0083
         3         0.0469     -0.0408      0.0043      0.0035
         4         0.0048      0.0951      0.0006      0.0335
         5         0.0195      0.0147     -0.0905     -0.0188
  1/2[<0|del|b>*<b|r|0> + (<0|r|b>*<b|del|0>)*] (Au)
       state          X           Y           Z        Dip. S.   Osc.(frdel)
         1        -0.0016     -0.0534      0.0000      0.0550      0.0367
         2         0.0000      0.0000      0.0000      0.0000      0.0000
         3        -0.0464     -0.0017      0.0000      0.0480      0.0320
         4        -0.0017     -0.0368      0.0000      0.0385      0.0256
         5        -0.5188     -0.0132      0.0000      0.5320      0.3547

 Excitation energies and oscillator strengths:
 
 Excited State   1:  2.034-A      1.7243 eV  719.02 nm  f=0.0298  <S**2>=0.785
     72A -> 73A        0.98221
     69B -> 72B        0.12051
 This state for optimization and/or second-order correction.
 Total Energy, E(TD-HF/TD-KS) =  -3263.05473214    
 Copying the excited state density for this state as the 1-particle RhoCI density.
 
 Excited State   2:  2.317-A      2.4277 eV  510.71 nm  f=0.0000  <S**2>=1.092
     70A -> 73A       -0.12457
     71B -> 72B        0.93818
     71B -> 73B        0.28845
     71B -> 79B       -0.11839
 
 Excited State   3:  2.182-A      2.8245 eV  438.96 nm  f=0.0310  <S**2>=0.940
     72A -> 74A        0.67986
     72A -> 75A        0.13823
     68B -> 73B        0.10863
     69B -> 72B        0.12884
     70B -> 72B        0.63432
 
 Excited State   4:  2.356-A      3.0116 eV  411.69 nm  f=0.0261  <S**2>=1.138
     68A -> 73A       -0.17908
     69A -> 73A        0.12932
     72A -> 75A        0.34019
     67B -> 72B        0.10690
     68B -> 73B        0.13254
     69B -> 72B        0.78138
     69B -> 73B        0.11593
     70B -> 72B       -0.30972
 
 Excited State   5:  2.106-A      3.1268 eV  396.52 nm  f=0.3556  <S**2>=0.859
     71A -> 73A        0.10334
     72A -> 74A       -0.70577
     72A -> 75A        0.30399
     68B -> 73B        0.13627
     69B -> 72B        0.13309
     70B -> 72B        0.56934
 SavETr:  write IOETrn=   770 NScale= 10 NData=  16 NLR=1 NState=    5 LETran=      96.
          IDoAtm=1111111111111111111111111
 NEqPCM:  Using equilibrium solvation (IEInf=0, Eps=  35.6880, EpsInf=   1.8069)
          Differentiating once with respect to electric field.
                with respect to dipole field.
          Differentiating once with respect to nuclear coordinates.
          There are     1 degrees of freedom in the 1st order CPHF.  IDoFFX=0 NUNeed=     1.
 LinEq1:  Iter=  0 NonCon=     1 RMS=2.63D-03 Max=1.96D-01 NDo=     1
 AX will form     1 AO Fock derivatives at one time.
 LinEq1:  Iter=  1 NonCon=     1 RMS=1.86D-03 Max=1.58D-01 NDo=     1
 LinEq1:  Iter=  2 NonCon=     1 RMS=1.01D-03 Max=6.66D-02 NDo=     1
 LinEq1:  Iter=  3 NonCon=     1 RMS=7.50D-04 Max=3.13D-02 NDo=     1
 LinEq1:  Iter=  4 NonCon=     1 RMS=5.56D-04 Max=2.44D-02 NDo=     1
 LinEq1:  Iter=  5 NonCon=     1 RMS=3.74D-04 Max=1.81D-02 NDo=     1
 LinEq1:  Iter=  6 NonCon=     1 RMS=3.04D-04 Max=1.71D-02 NDo=     1
 LinEq1:  Iter=  7 NonCon=     1 RMS=2.01D-04 Max=1.34D-02 NDo=     1
 LinEq1:  Iter=  8 NonCon=     1 RMS=1.63D-04 Max=1.25D-02 NDo=     1
 LinEq1:  Iter=  9 NonCon=     1 RMS=7.98D-05 Max=3.79D-03 NDo=     1
 LinEq1:  Iter= 10 NonCon=     1 RMS=4.89D-05 Max=2.62D-03 NDo=     1
 LinEq1:  Iter= 11 NonCon=     1 RMS=2.78D-05 Max=1.02D-03 NDo=     1
 LinEq1:  Iter= 12 NonCon=     1 RMS=1.34D-05 Max=4.78D-04 NDo=     1
 LinEq1:  Iter= 13 NonCon=     1 RMS=1.06D-05 Max=4.58D-04 NDo=     1
 LinEq1:  Iter= 14 NonCon=     1 RMS=6.97D-06 Max=3.15D-04 NDo=     1
 LinEq1:  Iter= 15 NonCon=     1 RMS=4.06D-06 Max=1.96D-04 NDo=     1
 LinEq1:  Iter= 16 NonCon=     1 RMS=2.72D-06 Max=1.48D-04 NDo=     1
 LinEq1:  Iter= 17 NonCon=     1 RMS=1.75D-06 Max=6.27D-05 NDo=     1
 LinEq1:  Iter= 18 NonCon=     1 RMS=8.84D-07 Max=3.87D-05 NDo=     1
 LinEq1:  Iter= 19 NonCon=     1 RMS=6.56D-07 Max=2.70D-05 NDo=     1
 LinEq1:  Iter= 20 NonCon=     1 RMS=3.94D-07 Max=2.30D-05 NDo=     1
 LinEq1:  Iter= 21 NonCon=     1 RMS=2.00D-07 Max=9.16D-06 NDo=     1
 LinEq1:  Iter= 22 NonCon=     1 RMS=1.38D-07 Max=4.94D-06 NDo=     1
 LinEq1:  Iter= 23 NonCon=     1 RMS=7.36D-08 Max=2.43D-06 NDo=     1
 LinEq1:  Iter= 24 NonCon=     1 RMS=4.61D-08 Max=1.38D-06 NDo=     1
 LinEq1:  Iter= 25 NonCon=     1 RMS=2.56D-08 Max=9.53D-07 NDo=     1
 LinEq1:  Iter= 26 NonCon=     1 RMS=1.75D-08 Max=5.64D-07 NDo=     1
 LinEq1:  Iter= 27 NonCon=     1 RMS=7.54D-09 Max=3.54D-07 NDo=     1
 LinEq1:  Iter= 28 NonCon=     1 RMS=3.42D-09 Max=1.13D-07 NDo=     1
 LinEq1:  Iter= 29 NonCon=     1 RMS=2.58D-09 Max=9.67D-08 NDo=     1
 LinEq1:  Iter= 30 NonCon=     1 RMS=9.09D-10 Max=3.11D-08 NDo=     1
 LinEq1:  Iter= 31 NonCon=     1 RMS=3.55D-10 Max=1.45D-08 NDo=     1
 LinEq1:  Iter= 32 NonCon=     1 RMS=2.31D-10 Max=1.03D-08 NDo=     1
 LinEq1:  Iter= 33 NonCon=     1 RMS=8.80D-11 Max=2.84D-09 NDo=     1
 LinEq1:  Iter= 34 NonCon=     0 RMS=2.98D-11 Max=9.51D-10 NDo=     1
 Linear equations converged to 1.000D-10 1.000D-09 after    34 iterations.
 End of Minotr F.D. properties file   721 does not exist.
 End of Minotr F.D. properties file   722 does not exist.
 End of Minotr F.D. properties file   788 does not exist.
 D1PCM: PCM CHGder 1st derivatives, ID1Alg=3 FixD1E=F DoIter=F DoCFld=F I1PDM=6.
 Calling FoFJK, ICntrl=  10005127 FMM=F ISym2X=0 I1Cent= 0 IOpClX= 1 NMat=1 NMatS=1 NMatT=0.
 ***** Axes restored to original set *****
 -------------------------------------------------------------------
 Center     Atomic                   Forces (Hartrees/Bohr)
 Number     Number              X              Y              Z
 -------------------------------------------------------------------
      1        6          -0.000017567    0.000018446   -0.000003461
      2        6          -0.000116999    0.000019393    0.000005572
      3        6           0.000120840   -0.000042290   -0.000012899
      4        6           0.000044021    0.000049233   -0.000050668
      5        6          -0.000021794   -0.000018026   -0.000001870
      6        6           0.000000091   -0.000023763    0.000001738
      7        1           0.000000782   -0.000032058   -0.000001164
      8        1           0.000011475   -0.000021718    0.000006305
      9        1           0.000009445   -0.000014757    0.000001695
     10        1           0.000003033   -0.000006707    0.000000657
     11        6          -0.000024185   -0.000069983    0.000224215
     12        8           0.000003795    0.000046098   -0.000096153
     13        6          -0.000025333   -0.000008750   -0.000019707
     14        6          -0.000012657    0.000054435   -0.000053841
     15        6          -0.000081734   -0.000059118   -0.000018700
     16        6          -0.000043060    0.000052463    0.000003136
     17        6           0.000174236   -0.000009864    0.000004824
     18        6           0.000111857   -0.000065688   -0.000001522
     19        1           0.000011565   -0.000009838    0.000002287
     20        6          -0.000129659    0.000097426   -0.000003723
     21        1          -0.000004396    0.000000374    0.000008969
     22        1           0.000014173   -0.000011439   -0.000000364
     23       35          -0.000030303    0.000034555    0.000000637
     24        8           0.000019147   -0.000004769    0.000004013
     25        1          -0.000016773    0.000026346    0.000000020
 -------------------------------------------------------------------
 Cartesian Forces:  Max     0.000224215 RMS     0.000052770

 GradGradGradGradGradGradGradGradGradGradGradGradGradGradGradGradGradGrad
 Berny optimization.
 Using GEDIIS/GDIIS optimizer.
 FormGI is forming the generalized inverse of G from B-inverse, IUseBI=4.
 Internal  Forces:  Max     0.000114679 RMS     0.000023442
 Search for a local minimum.
 Step number   6 out of a maximum of  146
 All quantities printed in internal units (Hartrees-Bohrs-Radians)
 Mixed Optimization -- En-DIIS/RFO-DIIS
 Swapping is turned off.
 Update second derivatives using D2CorX and points    1    2    3    4    5
                                                      6
 DE= -8.35D-07 DEPred=-1.28D-06 R= 6.54D-01
 TightC=F SS=  1.41D+00  RLast= 6.14D-03 DXNew= 8.4853D-01 1.8417D-02
 Trust test= 6.54D-01 RLast= 6.14D-03 DXMaxT set to 5.05D-01
 ITU=  1  1  1  1  1  0
     Eigenvalues ---    0.00895   0.01163   0.01371   0.01538   0.01609
     Eigenvalues ---    0.01672   0.01731   0.01795   0.01927   0.02148
     Eigenvalues ---    0.02149   0.02163   0.02167   0.02170   0.02170
     Eigenvalues ---    0.02179   0.02185   0.02191   0.02193   0.02199
     Eigenvalues ---    0.02216   0.04043   0.13884   0.15562   0.16000
     Eigenvalues ---    0.16000   0.16005   0.16024   0.16145   0.16543
     Eigenvalues ---    0.17991   0.20580   0.21916   0.22162   0.22625
     Eigenvalues ---    0.23007   0.24465   0.24793   0.24991   0.25021
     Eigenvalues ---    0.25146   0.25365   0.28889   0.31831   0.32542
     Eigenvalues ---    0.33451   0.35467   0.35480   0.35568   0.35606
     Eigenvalues ---    0.35657   0.35674   0.35838   0.38310   0.39487
     Eigenvalues ---    0.41250   0.42277   0.42486   0.43419   0.44633
     Eigenvalues ---    0.45601   0.46145   0.46721   0.46797   0.47313
     Eigenvalues ---    0.49359   0.56072   0.66443   0.94776
 En-DIIS/RFO-DIIS IScMMF=        0 using points:     6    5    4
 RFO step:  Lambda=-2.15297793D-07.
 DidBck=F Rises=F RFO-DIIS coefs:    0.83474    0.15542    0.00984
 Iteration  1 RMS(Cart)=  0.00064500 RMS(Int)=  0.00000095
 Iteration  2 RMS(Cart)=  0.00000087 RMS(Int)=  0.00000052
 Variable       Old X    -DE/DX   Delta X   Delta X   Delta X     New X
                                 (Linear)    (Quad)   (Total)
    R1        2.65696   0.00002   0.00006  -0.00019  -0.00013   2.65683
    R2        2.61604   0.00001  -0.00005   0.00018   0.00014   2.61618
    R3        2.04703  -0.00001   0.00000   0.00000  -0.00001   2.04702
    R4        2.64075   0.00011  -0.00004   0.00035   0.00031   2.64106
    R5        2.04433  -0.00002  -0.00002   0.00003   0.00001   2.04434
    R6        2.68376  -0.00002   0.00006  -0.00023  -0.00017   2.68359
    R7        2.72170   0.00003   0.00019  -0.00060  -0.00041   2.72128
    R8        2.62889   0.00004   0.00000   0.00005   0.00006   2.62895
    R9        2.78195  -0.00003   0.00000  -0.00009  -0.00009   2.78187
   R10        2.66053   0.00000   0.00000  -0.00002  -0.00002   2.66051
   R11        2.04466   0.00001  -0.00001   0.00005   0.00004   2.04470
   R12        2.04982   0.00000   0.00001  -0.00003  -0.00002   2.04979
   R13        2.36695  -0.00004   0.00001  -0.00008  -0.00007   2.36688
   R14        2.76592   0.00001  -0.00003   0.00013   0.00010   2.76602
   R15        2.72229   0.00002  -0.00001   0.00010   0.00009   2.72238
   R16        2.48275   0.00002  -0.00001   0.00001   0.00000   2.48275
   R17        2.69345  -0.00004   0.00000  -0.00008  -0.00008   2.69337
   R18        2.64201   0.00000   0.00008  -0.00026  -0.00019   2.64182
   R19        2.64069   0.00010  -0.00001   0.00021   0.00020   2.64089
   R20        2.66140   0.00001   0.00002  -0.00007  -0.00005   2.66135
   R21        2.04064   0.00002  -0.00002   0.00011   0.00009   2.04072
   R22        2.67569  -0.00008   0.00014  -0.00065  -0.00051   2.67518
   R23        2.04952   0.00000  -0.00001   0.00003   0.00002   2.04953
   R24        2.60050   0.00003  -0.00006   0.00029   0.00023   2.60073
   R25        3.61575  -0.00004   0.00007  -0.00042  -0.00035   3.61540
   R26        2.04265   0.00000  -0.00001   0.00002   0.00001   2.04266
   R27        1.82919   0.00001   0.00001  -0.00005  -0.00003   1.82915
    A1        2.08463   0.00000   0.00003  -0.00011  -0.00008   2.08455
    A2        2.09169   0.00002  -0.00004   0.00026   0.00022   2.09191
    A3        2.10686  -0.00002   0.00001  -0.00014  -0.00013   2.10673
    A4        2.09461   0.00001  -0.00003   0.00014   0.00011   2.09472
    A5        2.09857   0.00001  -0.00001   0.00008   0.00007   2.09864
    A6        2.09001  -0.00002   0.00003  -0.00022  -0.00018   2.08982
    A7        2.10476  -0.00003  -0.00002  -0.00004  -0.00006   2.10470
    A8        2.11232   0.00003   0.00008  -0.00023  -0.00014   2.11218
    A9        2.06611   0.00001  -0.00007   0.00027   0.00020   2.06631
   A10        2.07032   0.00001   0.00004  -0.00009  -0.00005   2.07027
   A11        2.10599   0.00001   0.00000   0.00004   0.00004   2.10602
   A12        2.10688  -0.00002  -0.00003   0.00005   0.00001   2.10689
   A13        2.10248   0.00001  -0.00004   0.00018   0.00013   2.10262
   A14        2.07084  -0.00001   0.00002  -0.00010  -0.00008   2.07076
   A15        2.10987  -0.00001   0.00002  -0.00007  -0.00006   2.10981
   A16        2.10956   0.00000   0.00002  -0.00006  -0.00005   2.10952
   A17        2.09256   0.00000   0.00002  -0.00007  -0.00006   2.09251
   A18        2.08106   0.00000  -0.00003   0.00014   0.00010   2.08116
   A19        2.10666   0.00001  -0.00004   0.00018   0.00014   2.10680
   A20        2.06898  -0.00001   0.00004  -0.00017  -0.00013   2.06884
   A21        2.10755   0.00000   0.00000   0.00000  -0.00001   2.10754
   A22        2.15389  -0.00002   0.00004  -0.00020  -0.00016   2.15372
   A23        2.00745   0.00001   0.00004  -0.00009  -0.00005   2.00740
   A24        2.12185   0.00001  -0.00008   0.00029   0.00022   2.12206
   A25        2.11734   0.00002   0.00003  -0.00006  -0.00002   2.11731
   A26        2.08961  -0.00003  -0.00004   0.00006   0.00002   2.08963
   A27        2.07624   0.00000   0.00001   0.00000   0.00000   2.07624
   A28        2.05408  -0.00001  -0.00004   0.00012   0.00008   2.05416
   A29        2.13287   0.00005  -0.00001   0.00020   0.00019   2.13305
   A30        2.09624  -0.00004   0.00005  -0.00032  -0.00027   2.09598
   A31        2.08191   0.00003  -0.00007   0.00035   0.00029   2.08220
   A32        2.07962  -0.00001   0.00000  -0.00004  -0.00004   2.07958
   A33        2.12165  -0.00002   0.00007  -0.00032  -0.00025   2.12140
   A34        2.11028   0.00003  -0.00006   0.00031   0.00025   2.11053
   A35        2.13427  -0.00001   0.00013  -0.00055  -0.00041   2.13385
   A36        2.03864  -0.00002  -0.00008   0.00024   0.00016   2.03880
   A37        2.14441  -0.00004   0.00008  -0.00042  -0.00034   2.14407
   A38        2.05926   0.00004  -0.00007   0.00037   0.00031   2.05957
   A39        2.07951   0.00000  -0.00001   0.00005   0.00004   2.07955
   A40        2.05729   0.00001  -0.00001   0.00008   0.00007   2.05736
   A41        2.10079   0.00002  -0.00001   0.00015   0.00014   2.10093
   A42        2.12510  -0.00003   0.00002  -0.00023  -0.00021   2.12490
   A43        1.97615   0.00005   0.00021  -0.00057  -0.00036   1.97579
    D1       -0.00003   0.00000   0.00001   0.00004   0.00005   0.00002
    D2       -3.14158   0.00000   0.00000  -0.00002  -0.00003   3.14158
    D3        3.14155   0.00000   0.00001   0.00006   0.00007  -3.14157
    D4        0.00001   0.00000   0.00000  -0.00001  -0.00001   0.00000
    D5       -0.00003   0.00000   0.00001   0.00004   0.00005   0.00003
    D6       -3.14158   0.00000   0.00000  -0.00002  -0.00002   3.14158
    D7        3.14157   0.00000   0.00000   0.00003   0.00003  -3.14158
    D8        0.00002   0.00000   0.00000  -0.00003  -0.00004  -0.00002
    D9        0.00011  -0.00001  -0.00003  -0.00015  -0.00018  -0.00008
   D10       -3.14144  -0.00001  -0.00004  -0.00028  -0.00033   3.14142
   D11       -3.14153   0.00000  -0.00002  -0.00009  -0.00011   3.14155
   D12        0.00011  -0.00001  -0.00003  -0.00022  -0.00025  -0.00014
   D13       -0.00013   0.00001   0.00004   0.00018   0.00022   0.00009
   D14        3.14140   0.00001   0.00005   0.00034   0.00039  -3.14140
   D15        3.14142   0.00001   0.00005   0.00030   0.00036  -3.14141
   D16       -0.00024   0.00001   0.00007   0.00046   0.00053   0.00028
   D17        3.14129   0.00001   0.00005   0.00064   0.00068  -3.14121
   D18       -0.00031   0.00000   0.00009   0.00016   0.00025  -0.00006
   D19       -0.00025   0.00000   0.00003   0.00051   0.00054   0.00029
   D20        3.14133   0.00000   0.00007   0.00004   0.00011   3.14144
   D21        0.00007   0.00000  -0.00002  -0.00009  -0.00012  -0.00005
   D22       -3.14159   0.00000   0.00000   0.00002   0.00002  -3.14157
   D23       -3.14145  -0.00001  -0.00004  -0.00025  -0.00029   3.14145
   D24        0.00007   0.00000  -0.00002  -0.00014  -0.00015  -0.00008
   D25        3.14002   0.00005   0.00038   0.00302   0.00340  -3.13976
   D26        0.00068  -0.00003  -0.00015  -0.00135  -0.00151  -0.00083
   D27       -0.00164   0.00005   0.00040   0.00318   0.00358   0.00193
   D28       -3.14098  -0.00002  -0.00014  -0.00119  -0.00133   3.14087
   D29        0.00001   0.00000   0.00000  -0.00002  -0.00002  -0.00001
   D30        3.14156   0.00000   0.00001   0.00004   0.00005  -3.14157
   D31       -3.14152   0.00000  -0.00002  -0.00014  -0.00015   3.14151
   D32        0.00004   0.00000  -0.00001  -0.00007  -0.00008  -0.00004
   D33       -0.00066   0.00003   0.00015   0.00134   0.00149   0.00083
   D34        3.14103   0.00002   0.00013   0.00114   0.00127  -3.14089
   D35       -3.14000  -0.00005  -0.00039  -0.00304  -0.00342   3.13977
   D36        0.00168  -0.00005  -0.00041  -0.00323  -0.00364  -0.00196
   D37        0.00028   0.00000  -0.00003  -0.00053  -0.00057  -0.00029
   D38       -3.14132   0.00000  -0.00003  -0.00060  -0.00063   3.14123
   D39       -3.14130   0.00000  -0.00008  -0.00003  -0.00011  -3.14141
   D40        0.00028   0.00000  -0.00008  -0.00010  -0.00017   0.00011
   D41       -3.14154   0.00000  -0.00002   0.00024   0.00022  -3.14132
   D42        0.00004   0.00000   0.00002  -0.00022  -0.00020  -0.00016
   D43        0.00019  -0.00001  -0.00006  -0.00042  -0.00048  -0.00029
   D44       -3.14140  -0.00001  -0.00006  -0.00035  -0.00042   3.14137
   D45       -3.14149  -0.00001  -0.00004  -0.00022  -0.00026   3.14143
   D46        0.00011  -0.00001  -0.00004  -0.00016  -0.00020  -0.00009
   D47        3.14146   0.00001   0.00004   0.00024   0.00028  -3.14144
   D48       -0.00007   0.00000   0.00002   0.00015   0.00017   0.00010
   D49       -0.00004   0.00000   0.00002   0.00005   0.00007   0.00003
   D50       -3.14158   0.00000   0.00000  -0.00005  -0.00004   3.14156
   D51        3.14149   0.00001   0.00004   0.00023   0.00027  -3.14142
   D52       -0.00005   0.00001   0.00003   0.00019   0.00022   0.00016
   D53       -0.00011   0.00001   0.00004   0.00017   0.00020   0.00009
   D54        3.14153   0.00001   0.00003   0.00012   0.00015  -3.14150
   D55       -0.00003   0.00000   0.00001   0.00005   0.00006   0.00003
   D56       -3.14156   0.00000  -0.00001  -0.00003  -0.00004   3.14158
   D57        3.14151   0.00001   0.00002   0.00015   0.00018  -3.14150
   D58       -0.00002   0.00000   0.00001   0.00007   0.00007   0.00005
   D59        0.00004   0.00000  -0.00001  -0.00006  -0.00007  -0.00003
   D60       -3.14156   0.00000  -0.00001  -0.00005  -0.00006   3.14156
   D61        3.14159   0.00000  -0.00001  -0.00002  -0.00003   3.14156
   D62       -0.00001   0.00000   0.00000  -0.00001  -0.00001  -0.00002
   D63        0.00003   0.00000  -0.00001  -0.00005  -0.00006  -0.00003
   D64       -3.14155   0.00000  -0.00001  -0.00006  -0.00008   3.14156
   D65        3.14156   0.00000   0.00001   0.00004   0.00004  -3.14158
   D66       -0.00002   0.00000   0.00000   0.00002   0.00003   0.00001
         Item               Value     Threshold  Converged?
 Maximum Force            0.000115     0.000450     YES
 RMS     Force            0.000023     0.000300     YES
 Maximum Displacement     0.003696     0.001800     NO 
 RMS     Displacement     0.000645     0.001200     YES
 Predicted change in Energy=-5.438943D-07
 GradGradGradGradGradGradGradGradGradGradGradGradGradGradGradGradGradGrad

                          Input orientation:                          
 ---------------------------------------------------------------------
 Center     Atomic      Atomic             Coordinates (Angstroms)
 Number     Number       Type             X           Y           Z
 ---------------------------------------------------------------------
      1          6           0       -5.094146    0.066788   -0.000389
      2          6           0       -4.037859    0.994637   -0.000040
      3          6           0       -2.713932    0.546896    0.000313
      4          6           0       -2.420976   -0.842651    0.000418
      5          6           0       -3.478476   -1.746575    0.000050
      6          6           0       -4.809607   -1.288078   -0.000358
      7          1           0       -6.119310    0.416704   -0.000688
      8          1           0       -4.245261    2.056387   -0.000073
      9          1           0       -3.255781   -2.805418    0.000147
     10          1           0       -5.618830   -2.010395   -0.000618
     11          6           0       -1.027090   -1.316110    0.001031
     12          8           0       -0.767752   -2.541465   -0.000850
     13          6           0       -1.615595    1.478225    0.000461
     14          6           0        0.048560   -0.323421    0.000467
     15          6           0       -0.232910    1.073779    0.000363
     16          6           0        1.381334   -0.745428    0.000180
     17          6           0        0.814067    1.999435    0.000086
     18          6           0        2.409155    0.217366   -0.000171
     19          1           0        1.598138   -1.803346    0.000288
     20          6           0        2.163482    1.571508   -0.000209
     21          1           0        0.640294    3.069990    0.000081
     22          1           0        2.966386    2.295220   -0.000448
     23         35           0        4.219558   -0.401287   -0.000540
     24          8           0       -1.961850    2.745593    0.000169
     25          1           0       -1.204168    3.347956    0.000034
 ---------------------------------------------------------------------
                    Distance matrix (angstroms):
                    1          2          3          4          5
     1  C    0.000000
     2  C    1.405932   0.000000
     3  C    2.428152   1.397590   0.000000
     4  C    2.823636   2.447435   1.420092   0.000000
     5  C    2.428720   2.797706   2.417548   1.391181   0.000000
     6  C    1.384423   2.409644   2.785495   2.429807   1.407882
     7  H    1.083237   2.160196   3.407866   3.906872   3.413764
     8  H    2.163125   1.081817   2.150240   3.425264   3.879495
     9  H    3.410155   3.879699   3.395822   2.132922   1.082008
    10  H    2.142425   3.395540   3.870164   3.404394   2.156553
    11  C    4.295737   3.795298   2.513210   1.472101   2.488893
    12  O    5.051799   4.816391   3.650423   2.370468   2.824866
    13  C    3.753994   2.470065   1.440041   2.456645   3.724200
    14  C    5.157489   4.293728   2.896345   2.523531   3.803334
    15  C    4.964438   3.805772   2.536351   2.908666   4.299779
    16  C    6.526219   5.691703   4.294333   3.803553   4.961859
    17  C    6.216278   4.954877   3.815317   4.306153   5.697238
    18  C    7.504812   6.493700   5.133674   4.945078   6.206550
    19  H    6.948674   6.292311   4.910965   4.132337   5.076931
    20  C    7.411973   6.228115   4.983874   5.181257   6.545331
    21  H    6.473255   5.117832   4.197241   4.967910   6.337473
    22  H    8.362899   7.123971   5.943286   6.234573   7.607388
    23  Br   9.325458   8.374577   6.998023   6.655185   7.814699
    24  O    4.121563   2.715817   2.323768   3.617498   4.741280
    25  H    5.089007   3.683465   3.182031   4.363692   5.579133
                    6          7          8          9         10
     6  C    0.000000
     7  H    2.149792   0.000000
     8  H    3.391745   2.490105   0.000000
     9  H    2.171795   4.310669   4.961473   0.000000
    10  H    1.084704   2.478163   4.292483   2.493204   0.000000
    11  C    3.782621   5.378973   4.661584   2.680503   4.643932
    12  O    4.231733   6.114731   5.764834   2.501991   4.880061
    13  C    4.225417   4.627125   2.692474   4.586917   5.310025
    14  C    4.953014   6.212118   4.909214   4.132672   5.913137
    15  C    5.150197   5.922960   4.130917   4.917918   6.206470
    16  C    6.214678   7.590139   6.285597   5.074090   7.113539
    17  C    6.514097   7.111734   5.059649   6.296847   7.580297
    18  C    7.374069   8.530794   6.903858   6.420959   8.331354
    19  H    6.428429   8.030419   7.003060   4.956276   7.219938
    20  C    7.536658   8.362907   6.427060   6.966053   8.567054
    21  H    6.978122   7.261692   4.989593   7.049810   8.061448
    22  H    8.561898   9.277860   7.215601   8.045612   9.604387
    23  Br   9.072608  10.371176   8.814381   7.852422   9.969107
    24  O    4.937634   4.765313   2.385157   5.699823   5.999411
    25  H    5.872989   5.722836   3.303997   6.486380   6.942706
                   11         12         13         14         15
    11  C    0.000000
    12  O    1.252499   0.000000
    13  C    2.855634   4.108131   0.000000
    14  C    1.463713   2.363490   2.452619   0.000000
    15  C    2.518391   3.654592   1.440622   1.425270   0.000000
    16  C    2.475113   2.800771   3.731784   1.397990   2.432138
    17  C    3.792454   4.808526   2.484938   2.445744   1.397498
    18  C    3.762889   4.207598   4.217627   2.421747   2.777400
    19  H    2.670060   2.478358   4.593124   2.142748   3.410364
    20  C    4.303266   5.050612   3.780228   2.839657   2.447535
    21  H    4.692339   5.785414   2.760933   3.444617   2.178840
    22  H    5.384195   6.110426   4.654248   3.920585   3.424531
    23  Br   5.325807   5.427119   6.130381   4.171725   4.690447
    24  O    4.167878   5.420226   1.313817   3.668868   2.405035
    25  H    4.667427   5.905568   1.914462   3.879218   2.472897
                   16         17         18         19         20
    16  C    0.000000
    17  C    2.802867   0.000000
    18  C    1.408328   2.391668   0.000000
    19  H    1.079905   3.882771   2.177389   0.000000
    20  C    2.445393   1.415642   1.376248   3.421879   0.000000
    21  H    3.886715   1.084566   3.356536   4.966575   2.136714
    22  H    3.428984   2.172548   2.151275   4.320919   1.080932
    23  Br   2.859012   4.166633   1.913188   2.972812   2.849450
    24  O    4.833643   2.874450   5.049516   5.776362   4.289153
    25  H    4.841550   2.427299   4.780868   5.864199   3.807471
                   21         22         23         24         25
    21  H    0.000000
    22  H    2.451728   0.000000
    23  Br   4.986069   2.973481   0.000000
    24  O    2.622286   4.948772   6.936328   0.000000
    25  H    1.865290   4.301369   6.593453   0.967947   0.000000
 Stoichiometry    C14H8BrO2(2)
 Framework group  C1[X(C14H8BrO2)]
 Deg. of freedom    69
 Full point group                 C1      NOp   1
 Largest Abelian subgroup         C1      NOp   1
 Largest concise Abelian subgroup C1      NOp   1
                         Standard orientation:                         
 ---------------------------------------------------------------------
 Center     Atomic      Atomic             Coordinates (Angstroms)
 Number     Number       Type             X           Y           Z
 ---------------------------------------------------------------------
      1          6           0        5.086819    0.025933    0.000302
      2          6           0        4.035097    0.958953   -0.000047
      3          6           0        2.708989    0.517713   -0.000400
      4          6           0        2.409219   -0.870379   -0.000504
      5          6           0        3.462270   -1.779482   -0.000137
      6          6           0        4.795635   -1.327521    0.000271
      7          1           0        6.113687    0.370814    0.000601
      8          1           0        4.247706    2.019672   -0.000014
      9          1           0        3.234383   -2.837219   -0.000234
     10          1           0        5.601305   -2.053800    0.000531
     11          6           0        1.013027   -1.336994   -0.001117
     12          8           0        0.747679   -2.561061    0.000763
     13          6           0        1.615234    1.454420   -0.000548
     14          6           0       -0.057740   -0.339039   -0.000554
     15          6           0        0.230582    1.056763   -0.000450
     16          6           0       -1.392568   -0.754502   -0.000267
     17          6           0       -0.811841    1.987545   -0.000173
     18          6           0       -2.415653    0.213323    0.000084
     19          1           0       -1.614561   -1.811343   -0.000374
     20          6           0       -2.163339    1.566244    0.000122
     21          1           0       -0.632817    3.057234   -0.000168
     22          1           0       -2.962683    2.293887    0.000361
     23         35           0       -4.229070   -0.396439    0.000453
     24          8           0        1.967703    2.720074   -0.000255
     25          1           0        1.212987    3.326147   -0.000120
 ---------------------------------------------------------------------
 Rotational constants (GHZ):      0.9923006      0.1761301      0.1495801
 Standard basis: 6-311G(d) (5D, 7F)
 There are   375 symmetry adapted cartesian basis functions of A   symmetry.
 There are   356 symmetry adapted basis functions of A   symmetry.
   356 basis functions,   642 primitive gaussians,   375 cartesian basis functions
    72 alpha electrons       71 beta electrons
       nuclear repulsion energy      1392.1191979363 Hartrees.
 NAtoms=   25 NActive=   25 NUniq=   25 SFac= 1.00D+00 NAtFMM=   60 NAOKFM=F Big=F
 Integral buffers will be    262144 words long.
 Raffenetti 2 integral format.
 Two-electron integral symmetry is turned on.
 Nuclear repulsion after empirical dispersion term =     1392.0558695454 Hartrees.
 ------------------------------------------------------------------------------
 Polarizable Continuum Model (PCM)
 =================================
 Model                : PCM (using non-symmetric T matrix).
 Atomic radii         : UFF (Universal Force Field).
 Polarization charges : Total charges.
 Charge compensation  : None.
 Solution method      : On-the-fly selection.
 Cavity type          : Scaled VdW (van der Waals Surface) (Alpha=1.100).
 Cavity algorithm     : GePol (No added spheres)
                        Default sphere list used, NSphG=   25.
                        Lebedev-Laikov grids with approx.  5.0 points / Ang**2.
                        Smoothing algorithm: Karplus/York (Gamma=1.0000).
                        Polarization charges: spherical gaussians, with
                                              point-specific exponents (IZeta= 3).
                        Self-potential: point-specific (ISelfS= 7).
                        Self-field    : sphere-specific E.n sum rule (ISelfD= 2).
 1st derivatives      : Analytical E(r).r(x)/FMM algorithm (CHGder, D1EAlg=3).
                        Cavity 1st derivative terms included.
 Solvent              : Acetonitrile, Eps=  35.688000 Eps(inf)=   1.806874
 ------------------------------------------------------------------------------
 One-electron integrals computed using PRISM.
 NBasis=   356 RedAO= T EigKep=  8.65D-05  NBF=   356
 NBsUse=   356 1.00D-06 EigRej= -1.00D+00 NBFU=   356
 Initial guess from the checkpoint file:  "C:\Users\Shengfu Liao\Desktop\suppliment.chk"
 B after Tr=     0.000000    0.000000    0.000000
         Rot=    1.000000    0.000065   -0.000059    0.000006 Ang=   0.01 deg.
 Initial guess <Sx>= 0.0000 <Sy>= 0.0000 <Sz>= 0.5000 <S**2>= 0.7725 S= 0.5112
 Requested convergence on RMS density matrix=1.00D-08 within 128 cycles.
 Requested convergence on MAX density matrix=1.00D-06.
 Requested convergence on             energy=1.00D-06.
 No special actions if energy rises.
 Inv3:  Mode=1 IEnd=    14467248.
 Iteration    1 A*A^-1 deviation from unit magnitude is 2.66D-15 for    479.
 Iteration    1 A*A^-1 deviation from orthogonality  is 3.24D-15 for   1087    827.
 Iteration    1 A^-1*A deviation from unit magnitude is 2.22D-15 for    748.
 Iteration    1 A^-1*A deviation from orthogonality  is 5.63D-12 for   2018   1478.
 Error on total polarization charges =  0.01435
 SCF Done:  E(UB3LYP) =  -3263.11813877     A.U. after    9 cycles
            NFock=  9  Conv=0.35D-08     -V/T= 2.0018
 <Sx>= 0.0000 <Sy>= 0.0000 <Sz>= 0.5000 <S**2>= 0.7725 S= 0.5112
 <L.S>= 0.000000000000E+00
 Annihilation of the first spin contaminant:
 S**2 before annihilation     0.7725,   after     0.7504
 DoSCS=F DFT=T ScalE2(SS,OS)=  1.000000  1.000000
 ExpMin= 1.03D-01 ExpMax= 4.40D+05 ExpMxC= 1.51D+04 IAcc=3 IRadAn=         5 AccDes= 0.00D+00
 HarFok:  IExCor=  205 AccDes= 0.00D+00 IRadAn=         5 IDoV=-2 UseB2=F ITyADJ=14
 ICtDFT= 12500011 ScaDFX=  1.000000  1.000000  1.000000  1.000000
 Range of M.O.s used for correlation:    31   356
 NBasis=   356 NAE=    72 NBE=    71 NFC=    30 NFV=     0
 NROrb=    326 NOA=    42 NOB=    41 NVA=   284 NVB=   285

 **** Warning!!: The largest alpha MO coefficient is  0.24994991D+02


 **** Warning!!: The smallest alpha delta epsilon is  0.97289715D-01


 **** Warning!!: The largest beta MO coefficient is  0.23781238D+02

 Ignoring spin specification with unrestricted ground state.
 NEqPCM:  Using equilibrium solvation (IEInf=0, Eps=  35.6880, EpsInf=   1.8069)
 Orbital symmetries:
 Alpha Orbitals:
       Occupied  (A) (A) (A) (A) (A) (A) (A) (A) (A) (A) (A) (A)
                 (A) (A) (A) (A) (A) (A) (A) (A) (A) (A) (A) (A)
                 (A) (A) (A) (A) (A) (A) (A) (A) (A) (A) (A) (A)
                 (A) (A) (A) (A) (A) (A) (A) (A) (A) (A) (A) (A)
                 (A) (A) (A) (A) (A) (A) (A) (A) (A) (A) (A) (A)
                 (A) (A) (A) (A) (A) (A) (A) (A) (A) (A) (A) (A)
       Virtual   (A) (A) (A) (A) (A) (A) (A) (A) (A) (A) (A) (A)
                 (A) (A) (A) (A) (A) (A) (A) (A) (A) (A) (A) (A)
                 (A) (A) (A) (A) (A) (A) (A) (A) (A) (A) (A) (A)
                 (A) (A) (A) (A) (A) (A) (A) (A) (A) (A) (A) (A)
                 (A) (A) (A) (A) (A) (A) (A) (A) (A) (A) (A) (A)
                 (A) (A) (A) (A) (A) (A) (A) (A) (A) (A) (A) (A)
                 (A) (A) (A) (A) (A) (A) (A) (A) (A) (A) (A) (A)
                 (A) (A) (A) (A) (A) (A) (A) (A) (A) (A) (A) (A)
                 (A) (A) (A) (A) (A) (A) (A) (A) (A) (A) (A) (A)
                 (A) (A) (A) (A) (A) (A) (A) (A) (A) (A) (A) (A)
                 (A) (A) (A) (A) (A) (A) (A) (A) (A) (A) (A) (A)
                 (A) (A) (A) (A) (A) (A) (A) (A) (A) (A) (A) (A)
                 (A) (A) (A) (A) (A) (A) (A) (A) (A) (A) (A) (A)
                 (A) (A) (A) (A) (A) (A) (A) (A) (A) (A) (A) (A)
                 (A) (A) (A) (A) (A) (A) (A) (A) (A) (A) (A) (A)
                 (A) (A) (A) (A) (A) (A) (A) (A) (A) (A) (A) (A)
                 (A) (A) (A) (A) (A) (A) (A) (A) (A) (A) (A) (A)
                 (A) (A) (A) (A) (A) (A) (A) (A) (A) (A) (A) (A)
                 (A) (A) (A) (A) (A) (A) (A) (A) (A) (A) (A) (A)
                 (A) (A) (A) (A) (A) (A) (A) (A) (A) (A) (A) (A)
                 (A) (A) (A) (A) (A) (A) (A) (A) (A) (A) (A) (A)
                 (A) (A) (A) (A) (A) (A) (A) (A) (A) (A) (A) (A)
                 (A) (A) (A) (A) (A) (A) (A) (A) (A) (A) (A) (A)
                 (A) (A) (A) (A) (A) (A) (A) (A)
 Beta  Orbitals:
       Occupied  (A) (A) (A) (A) (A) (A) (A) (A) (A) (A) (A) (A)
                 (A) (A) (A) (A) (A) (A) (A) (A) (A) (A) (A) (A)
                 (A) (A) (A) (A) (A) (A) (A) (A) (A) (A) (A) (A)
                 (A) (A) (A) (A) (A) (A) (A) (A) (A) (A) (A) (A)
                 (A) (A) (A) (A) (A) (A) (A) (A) (A) (A) (A) (A)
                 (A) (A) (A) (A) (A) (A) (A) (A) (A) (A) (A)
       Virtual   (A) (A) (A) (A) (A) (A) (A) (A) (A) (A) (A) (A)
                 (A) (A) (A) (A) (A) (A) (A) (A) (A) (A) (A) (A)
                 (A) (A) (A) (A) (A) (A) (A) (A) (A) (A) (A) (A)
                 (A) (A) (A) (A) (A) (A) (A) (A) (A) (A) (A) (A)
                 (A) (A) (A) (A) (A) (A) (A) (A) (A) (A) (A) (A)
                 (A) (A) (A) (A) (A) (A) (A) (A) (A) (A) (A) (A)
                 (A) (A) (A) (A) (A) (A) (A) (A) (A) (A) (A) (A)
                 (A) (A) (A) (A) (A) (A) (A) (A) (A) (A) (A) (A)
                 (A) (A) (A) (A) (A) (A) (A) (A) (A) (A) (A) (A)
                 (A) (A) (A) (A) (A) (A) (A) (A) (A) (A) (A) (A)
                 (A) (A) (A) (A) (A) (A) (A) (A) (A) (A) (A) (A)
                 (A) (A) (A) (A) (A) (A) (A) (A) (A) (A) (A) (A)
                 (A) (A) (A) (A) (A) (A) (A) (A) (A) (A) (A) (A)
                 (A) (A) (A) (A) (A) (A) (A) (A) (A) (A) (A) (A)
                 (A) (A) (A) (A) (A) (A) (A) (A) (A) (A) (A) (A)
                 (A) (A) (A) (A) (A) (A) (A) (A) (A) (A) (A) (A)
                 (A) (A) (A) (A) (A) (A) (A) (A) (A) (A) (A) (A)
                 (A) (A) (A) (A) (A) (A) (A) (A) (A) (A) (A) (A)
                 (A) (A) (A) (A) (A) (A) (A) (A) (A) (A) (A) (A)
                 (A) (A) (A) (A) (A) (A) (A) (A) (A) (A) (A) (A)
                 (A) (A) (A) (A) (A) (A) (A) (A) (A) (A) (A) (A)
                 (A) (A) (A) (A) (A) (A) (A) (A) (A) (A) (A) (A)
                 (A) (A) (A) (A) (A) (A) (A) (A) (A) (A) (A) (A)
                 (A) (A) (A) (A) (A) (A) (A) (A) (A)
 Generating guess from densities on rwf.
 Convergence on wavefunction:    0.000001000000000
 Iteration     1 Dimension    10 NMult     0 NNew     10
 CISAX will form    10 AO SS matrices at one time.
 Iteration     2 Dimension    20 NMult    10 NNew     10
 Iteration     3 Dimension    30 NMult    20 NNew     10
 Iteration     4 Dimension    40 NMult    30 NNew     10
 Iteration     5 Dimension    50 NMult    40 NNew     10
 Iteration     6 Dimension    60 NMult    50 NNew     10
 Iteration     7 Dimension    70 NMult    60 NNew     10
 Iteration     8 Dimension    78 NMult    70 NNew      8
 Iteration     9 Dimension    82 NMult    78 NNew      4
 Iteration    10 Dimension    86 NMult    82 NNew      4
 Iteration    11 Dimension    88 NMult    86 NNew      2
 ***********************************************************************
 Excited states from <AA,BB:AA,BB> singles matrix:
 ***********************************************************************
 
 ExtSpn:  IState=     1 X2= 1.009 Y2= 0.009 X2-Y2-1=-1.03D-14
          S2Grnd=  0.772 Ra=  0.005 Rb=  0.007 T=  0.000 S2Ext=  0.012 S2=  0.785
 ExtSpn:  IState=     2 X2= 1.002 Y2= 0.002 X2-Y2-1=-1.11D-15
          S2Grnd=  0.772 Ra=  0.017 Rb=  0.189 T=  0.113 S2Ext=  0.319 S2=  1.091
 ExtSpn:  IState=     3 X2= 1.012 Y2= 0.012 X2-Y2-1= 5.77D-15
          S2Grnd=  0.772 Ra=  0.045 Rb=  0.042 T=  0.081 S2Ext=  0.167 S2=  0.940
 ExtSpn:  IState=     4 X2= 1.011 Y2= 0.011 X2-Y2-1= 4.44D-16
          S2Grnd=  0.772 Ra=  0.090 Rb=  0.098 T=  0.176 S2Ext=  0.363 S2=  1.136
 ExtSpn:  IState=     5 X2= 1.006 Y2= 0.006 X2-Y2-1= 1.09D-14
          S2Grnd=  0.772 Ra=  0.029 Rb=  0.041 T=  0.014 S2Ext=  0.084 S2=  0.856
 Ground to excited state transition densities written to RWF  633
 Ground to excited state transition electric dipole moments (Au):
       state          X           Y           Z        Dip. S.      Osc.
         1         0.1400      0.8280      0.0001      0.7052      0.0298
         2         0.0011     -0.0001      0.0005      0.0000      0.0000
         3         0.6543     -0.1269      0.0000      0.4442      0.0307
         4        -0.1198     -0.5822      0.0000      0.3534      0.0261
         5        -2.1415      0.3321      0.0000      4.6963      0.3598
 Ground to excited state transition velocity dipole moments (Au):
       state          X           Y           Z        Dip. S.      Osc.
         1        -0.0115     -0.0645      0.0000      0.0043      0.0452
         2        -0.0001      0.0000     -0.0002      0.0000      0.0000
         3        -0.0702      0.0131      0.0000      0.0051      0.0327
         4         0.0139      0.0632      0.0000      0.0042      0.0252
         5         0.2453     -0.0386      0.0000      0.0617      0.3578
 Ground to excited state transition magnetic dipole moments (Au):
       state          X           Y           Z
         1         0.0001      0.0000     -0.0762
         2        -0.0806     -0.3753     -0.0003
         3         0.0001      0.0005     -0.2669
         4        -0.0001     -0.0003      0.2495
         5         0.0000     -0.0001     -1.3620
 Ground to excited state transition velocity quadrupole moments (Au):
       state          XX          YY          ZZ          XY          XZ          YZ
         1        -0.1650     -0.0122      0.0002     -0.1398      0.0000      0.0000
         2        -0.0006      0.0001      0.0000     -0.0001      0.0091     -0.0013
         3        -0.4332      0.0476      0.0005     -0.0858      0.0000      0.0000
         4         0.5734     -0.0987      0.0129      0.0651      0.0000      0.0000
         5         0.5744      0.1349     -0.0104     -0.3154      0.0001      0.0000
 <0|del|b> * <b|rxdel|0> + <0|del|b> * <b|delr+rdel|0>
 Rotatory Strengths (R) in cgs (10**-40 erg-esu-cm/Gauss)
       state          XX          YY          ZZ    R(velocity)    E-M Angle
         1         0.0155     -0.0180      0.0073      0.0016       90.00
         2        -0.0156      0.0328      0.0163      0.0112       90.00
         3         0.0271     -0.0276     -0.0066     -0.0024       90.00
         4        -0.0607     -0.0066     -0.0577     -0.0417       90.00
         5         0.0369      0.0313      0.0205      0.0295       90.00
 1/2[<0|r|b>*<b|rxdel|0> + (<0|rxdel|b>*<b|r|0>)*]
 Rotatory Strengths (R) in cgs (10**-40 erg-esu-cm/Gauss)
       state          XX          YY          ZZ     R(length)
         1        -0.0148      0.0084      0.0063      0.0000
         2         0.0642     -0.0322      0.0001      0.0107
         3        -0.0558      0.0478      0.0025     -0.0018
         4        -0.0056     -0.1085     -0.0058     -0.0400
         5         0.0352      0.0255      0.0346      0.0318
  1/2[<0|del|b>*<b|r|0> + (<0|r|b>*<b|del|0>)*] (Au)
       state          X           Y           Z        Dip. S.   Osc.(frdel)
         1        -0.0016     -0.0534      0.0000      0.0550      0.0367
         2         0.0000      0.0000      0.0000      0.0000      0.0000
         3        -0.0459     -0.0017      0.0000      0.0476      0.0317
         4        -0.0017     -0.0368      0.0000      0.0385      0.0256
         5        -0.5254     -0.0128      0.0000      0.5382      0.3588

 Excitation energies and oscillator strengths:
 
 Excited State   1:  2.034-A      1.7254 eV  718.59 nm  f=0.0298  <S**2>=0.785
     72A -> 73A        0.98218
     69B -> 72B        0.12064
 This state for optimization and/or second-order correction.
 Total Energy, E(TD-HF/TD-KS) =  -3263.05473204    
 Copying the excited state density for this state as the 1-particle RhoCI density.
 
 Excited State   2:  2.316-A      2.4275 eV  510.76 nm  f=0.0000  <S**2>=1.091
     70A -> 73A       -0.12445
     71B -> 72B        0.93815
     71B -> 73B        0.28832
     71B -> 79B       -0.11835
 
 Excited State   3:  2.182-A      2.8239 eV  439.05 nm  f=0.0307  <S**2>=0.940
     72A -> 74A        0.67937
     72A -> 75A        0.13771
     68B -> 73B        0.10842
     69B -> 72B        0.12760
     70B -> 72B        0.63527
 
 Excited State   4:  2.354-A      3.0117 eV  411.68 nm  f=0.0261  <S**2>=1.136
     68A -> 73A       -0.17828
     69A -> 73A        0.12930
     72A -> 75A        0.33881
     67B -> 72B        0.10668
     68B -> 73B        0.13177
     69B -> 72B        0.78296
     69B -> 73B        0.11593
     70B -> 72B       -0.30823
 
 Excited State   5:  2.104-A      3.1267 eV  396.53 nm  f=0.3598  <S**2>=0.856
     71A -> 73A        0.10287
     72A -> 74A       -0.70719
     72A -> 75A        0.29572
     68B -> 73B        0.13544
     69B -> 72B        0.13712
     70B -> 72B        0.57179
 SavETr:  write IOETrn=   770 NScale= 10 NData=  16 NLR=1 NState=    5 LETran=      96.
          IDoAtm=1111111111111111111111111
 NEqPCM:  Using equilibrium solvation (IEInf=0, Eps=  35.6880, EpsInf=   1.8069)
          Differentiating once with respect to electric field.
                with respect to dipole field.
          Differentiating once with respect to nuclear coordinates.
          There are     1 degrees of freedom in the 1st order CPHF.  IDoFFX=0 NUNeed=     1.
 LinEq1:  Iter=  0 NonCon=     1 RMS=2.63D-03 Max=1.96D-01 NDo=     1
 AX will form     1 AO Fock derivatives at one time.
 LinEq1:  Iter=  1 NonCon=     1 RMS=1.86D-03 Max=1.58D-01 NDo=     1
 LinEq1:  Iter=  2 NonCon=     1 RMS=1.01D-03 Max=6.66D-02 NDo=     1
 LinEq1:  Iter=  3 NonCon=     1 RMS=7.49D-04 Max=3.12D-02 NDo=     1
 LinEq1:  Iter=  4 NonCon=     1 RMS=5.56D-04 Max=2.44D-02 NDo=     1
 LinEq1:  Iter=  5 NonCon=     1 RMS=3.73D-04 Max=1.81D-02 NDo=     1
 LinEq1:  Iter=  6 NonCon=     1 RMS=3.03D-04 Max=1.71D-02 NDo=     1
 LinEq1:  Iter=  7 NonCon=     1 RMS=2.01D-04 Max=1.34D-02 NDo=     1
 LinEq1:  Iter=  8 NonCon=     1 RMS=1.63D-04 Max=1.25D-02 NDo=     1
 LinEq1:  Iter=  9 NonCon=     1 RMS=7.97D-05 Max=3.80D-03 NDo=     1
 LinEq1:  Iter= 10 NonCon=     1 RMS=4.88D-05 Max=2.62D-03 NDo=     1
 LinEq1:  Iter= 11 NonCon=     1 RMS=2.78D-05 Max=1.02D-03 NDo=     1
 LinEq1:  Iter= 12 NonCon=     1 RMS=1.34D-05 Max=4.71D-04 NDo=     1
 LinEq1:  Iter= 13 NonCon=     1 RMS=1.05D-05 Max=4.54D-04 NDo=     1
 LinEq1:  Iter= 14 NonCon=     1 RMS=6.93D-06 Max=3.12D-04 NDo=     1
 LinEq1:  Iter= 15 NonCon=     1 RMS=4.04D-06 Max=1.96D-04 NDo=     1
 LinEq1:  Iter= 16 NonCon=     1 RMS=2.71D-06 Max=1.48D-04 NDo=     1
 LinEq1:  Iter= 17 NonCon=     1 RMS=1.74D-06 Max=6.29D-05 NDo=     1
 LinEq1:  Iter= 18 NonCon=     1 RMS=8.81D-07 Max=3.85D-05 NDo=     1
 LinEq1:  Iter= 19 NonCon=     1 RMS=6.54D-07 Max=2.70D-05 NDo=     1
 LinEq1:  Iter= 20 NonCon=     1 RMS=3.94D-07 Max=2.30D-05 NDo=     1
 LinEq1:  Iter= 21 NonCon=     1 RMS=2.00D-07 Max=9.17D-06 NDo=     1
 LinEq1:  Iter= 22 NonCon=     1 RMS=1.38D-07 Max=4.94D-06 NDo=     1
 LinEq1:  Iter= 23 NonCon=     1 RMS=7.34D-08 Max=2.43D-06 NDo=     1
 LinEq1:  Iter= 24 NonCon=     1 RMS=4.60D-08 Max=1.37D-06 NDo=     1
 LinEq1:  Iter= 25 NonCon=     1 RMS=2.55D-08 Max=9.51D-07 NDo=     1
 LinEq1:  Iter= 26 NonCon=     1 RMS=1.75D-08 Max=5.62D-07 NDo=     1
 LinEq1:  Iter= 27 NonCon=     1 RMS=7.53D-09 Max=3.53D-07 NDo=     1
 LinEq1:  Iter= 28 NonCon=     1 RMS=3.41D-09 Max=1.13D-07 NDo=     1
 LinEq1:  Iter= 29 NonCon=     1 RMS=2.58D-09 Max=9.69D-08 NDo=     1
 LinEq1:  Iter= 30 NonCon=     1 RMS=9.08D-10 Max=3.11D-08 NDo=     1
 LinEq1:  Iter= 31 NonCon=     1 RMS=3.53D-10 Max=1.45D-08 NDo=     1
 LinEq1:  Iter= 32 NonCon=     1 RMS=2.30D-10 Max=1.03D-08 NDo=     1
 LinEq1:  Iter= 33 NonCon=     1 RMS=8.78D-11 Max=2.85D-09 NDo=     1
 LinEq1:  Iter= 34 NonCon=     0 RMS=2.97D-11 Max=9.45D-10 NDo=     1
 Linear equations converged to 1.000D-10 1.000D-09 after    34 iterations.
 End of Minotr F.D. properties file   721 does not exist.
 End of Minotr F.D. properties file   722 does not exist.
 End of Minotr F.D. properties file   788 does not exist.
 D1PCM: PCM CHGder 1st derivatives, ID1Alg=3 FixD1E=F DoIter=F DoCFld=F I1PDM=6.
 Calling FoFJK, ICntrl=  10005127 FMM=F ISym2X=0 I1Cent= 0 IOpClX= 1 NMat=1 NMatS=1 NMatT=0.
 ***** Axes restored to original set *****
 -------------------------------------------------------------------
 Center     Atomic                   Forces (Hartrees/Bohr)
 Number     Number              X              Y              Z
 -------------------------------------------------------------------
      1        6          -0.000023454   -0.000081986    0.000002606
      2        6          -0.000005452    0.000040311   -0.000004271
      3        6          -0.000106425   -0.000038384    0.000025693
      4        6           0.000013771   -0.000012207    0.000069137
      5        6          -0.000008213   -0.000065270   -0.000000331
      6        6           0.000000653    0.000047821   -0.000001579
      7        1           0.000004669   -0.000014298    0.000001141
      8        1           0.000002317   -0.000028444   -0.000006752
      9        1           0.000005965   -0.000003274   -0.000003477
     10        1           0.000004698   -0.000018363   -0.000000121
     11        6          -0.000002097   -0.000005345   -0.000263413
     12        8           0.000003121   -0.000005661    0.000112945
     13        6           0.000067498   -0.000017550   -0.000030734
     14        6          -0.000090616    0.000064648    0.000073050
     15        6          -0.000008629   -0.000007266    0.000026438
     16        6           0.000063545   -0.000067957   -0.000004888
     17        6          -0.000075645    0.000061201   -0.000002934
     18        6           0.000017992    0.000058053    0.000000312
     19        1          -0.000005968    0.000010781   -0.000003964
     20        6           0.000047921   -0.000017395    0.000003227
     21        1           0.000017081    0.000006982   -0.000008140
     22        1           0.000002977   -0.000001107    0.000000622
     23       35          -0.000003544    0.000011968    0.000000156
     24        8           0.000097355    0.000012270    0.000012376
     25        1          -0.000019521    0.000070470    0.000002899
 -------------------------------------------------------------------
 Cartesian Forces:  Max     0.000263413 RMS     0.000049338

 GradGradGradGradGradGradGradGradGradGradGradGradGradGradGradGradGradGrad
 Berny optimization.
 Using GEDIIS/GDIIS optimizer.
 FormGI is forming the generalized inverse of G from B-inverse, IUseBI=4.
 Internal  Forces:  Max     0.000175324 RMS     0.000029062
 Search for a local minimum.
 Step number   7 out of a maximum of  146
 All quantities printed in internal units (Hartrees-Bohrs-Radians)
 Mixed Optimization -- En-DIIS/RFO-DIIS
 Swapping is turned off.
 Update second derivatives using D2CorX and points    1    2    3    4    5
                                                      6    7
 DE=  1.04D-07 DEPred=-5.44D-07 R=-1.91D-01
 Trust test=-1.91D-01 RLast= 7.93D-03 DXMaxT set to 2.52D-01
 ITU= -1  1  1  1  1  1  0
     Eigenvalues ---    0.00895   0.01187   0.01538   0.01566   0.01672
     Eigenvalues ---    0.01729   0.01792   0.01814   0.02138   0.02148
     Eigenvalues ---    0.02154   0.02164   0.02168   0.02170   0.02177
     Eigenvalues ---    0.02183   0.02190   0.02193   0.02199   0.02216
     Eigenvalues ---    0.03092   0.04043   0.11840   0.15598   0.16000
     Eigenvalues ---    0.16000   0.16003   0.16030   0.16165   0.16574
     Eigenvalues ---    0.18228   0.20033   0.21856   0.22092   0.22625
     Eigenvalues ---    0.22952   0.24436   0.24756   0.24991   0.25017
     Eigenvalues ---    0.25112   0.25469   0.28884   0.31826   0.32550
     Eigenvalues ---    0.34120   0.35446   0.35481   0.35521   0.35606
     Eigenvalues ---    0.35650   0.35673   0.35918   0.38119   0.39150
     Eigenvalues ---    0.41091   0.42166   0.42743   0.43677   0.44710
     Eigenvalues ---    0.45708   0.46280   0.46778   0.47037   0.47843
     Eigenvalues ---    0.49464   0.56058   0.67411   0.94682
 En-DIIS/RFO-DIIS IScMMF=        0 using points:     7    6    5    4
 RFO step:  Lambda=-2.60217656D-07.
 DidBck=T Rises=F RFO-DIIS coefs:    0.44350    0.49315    0.05883    0.00452
 Iteration  1 RMS(Cart)=  0.00042866 RMS(Int)=  0.00000027
 Iteration  2 RMS(Cart)=  0.00000029 RMS(Int)=  0.00000011
 Variable       Old X    -DE/DX   Delta X   Delta X   Delta X     New X
                                 (Linear)    (Quad)   (Total)
    R1        2.65683   0.00006   0.00010   0.00002   0.00011   2.65694
    R2        2.61618  -0.00003  -0.00009   0.00002  -0.00007   2.61611
    R3        2.04702  -0.00001   0.00000  -0.00002  -0.00001   2.04701
    R4        2.64106   0.00002  -0.00019   0.00020   0.00001   2.64107
    R5        2.04434  -0.00002  -0.00001  -0.00004  -0.00005   2.04429
    R6        2.68359   0.00004   0.00012  -0.00003   0.00009   2.68367
    R7        2.72128   0.00018   0.00030   0.00010   0.00040   2.72168
    R8        2.62895   0.00003  -0.00003   0.00007   0.00004   2.62900
    R9        2.78187  -0.00001   0.00005  -0.00007  -0.00002   2.78184
   R10        2.66051  -0.00001   0.00001  -0.00002   0.00000   2.66051
   R11        2.04470   0.00000  -0.00002   0.00002   0.00000   2.04470
   R12        2.04979   0.00001   0.00002   0.00000   0.00002   2.04981
   R13        2.36688   0.00001   0.00004  -0.00005   0.00000   2.36688
   R14        2.76602   0.00001  -0.00007   0.00005  -0.00002   2.76600
   R15        2.72238  -0.00003  -0.00005   0.00002  -0.00003   2.72235
   R16        2.48275   0.00006  -0.00001  -0.00002  -0.00002   2.48273
   R17        2.69337  -0.00001   0.00004  -0.00008  -0.00004   2.69333
   R18        2.64182   0.00007   0.00014   0.00001   0.00014   2.64196
   R19        2.64089   0.00004  -0.00011   0.00016   0.00005   2.64094
   R20        2.66135   0.00003   0.00003   0.00001   0.00005   2.66140
   R21        2.04072  -0.00001  -0.00006   0.00004  -0.00002   2.04071
   R22        2.67518   0.00006   0.00034  -0.00017   0.00017   2.67534
   R23        2.04953   0.00000  -0.00001   0.00000  -0.00002   2.04952
   R24        2.60073  -0.00002  -0.00015   0.00008  -0.00007   2.60066
   R25        3.61540   0.00000   0.00022  -0.00018   0.00004   3.61544
   R26        2.04266   0.00000  -0.00001   0.00000  -0.00001   2.04266
   R27        1.82915   0.00003   0.00002   0.00001   0.00004   1.82919
    A1        2.08455   0.00002   0.00006   0.00000   0.00005   2.08460
    A2        2.09191  -0.00001  -0.00013   0.00011  -0.00003   2.09188
    A3        2.10673  -0.00001   0.00008  -0.00010  -0.00003   2.10670
    A4        2.09472  -0.00001  -0.00007   0.00004  -0.00003   2.09469
    A5        2.09864   0.00001  -0.00004   0.00005   0.00001   2.09865
    A6        2.08982   0.00000   0.00011  -0.00009   0.00002   2.08985
    A7        2.10470  -0.00003   0.00003  -0.00010  -0.00007   2.10463
    A8        2.11218   0.00007   0.00011   0.00007   0.00018   2.11235
    A9        2.06631  -0.00003  -0.00014   0.00003  -0.00011   2.06620
   A10        2.07027   0.00003   0.00004   0.00005   0.00009   2.07036
   A11        2.10602   0.00000  -0.00002   0.00002   0.00000   2.10603
   A12        2.10689  -0.00003  -0.00002  -0.00007  -0.00010   2.10680
   A13        2.10262  -0.00002  -0.00009   0.00002  -0.00007   2.10255
   A14        2.07076   0.00001   0.00005  -0.00002   0.00004   2.07079
   A15        2.10981   0.00001   0.00004   0.00000   0.00004   2.10984
   A16        2.10952   0.00001   0.00003  -0.00001   0.00003   2.10954
   A17        2.09251   0.00000   0.00004  -0.00001   0.00003   2.09253
   A18        2.08116  -0.00001  -0.00007   0.00002  -0.00005   2.08111
   A19        2.10680  -0.00001  -0.00009   0.00005  -0.00004   2.10677
   A20        2.06884   0.00001   0.00009  -0.00005   0.00004   2.06888
   A21        2.10754   0.00000   0.00000   0.00000   0.00000   2.10754
   A22        2.15372   0.00000   0.00011  -0.00007   0.00003   2.15376
   A23        2.00740   0.00008   0.00004   0.00011   0.00015   2.00754
   A24        2.12206  -0.00008  -0.00015  -0.00003  -0.00018   2.12188
   A25        2.11731   0.00003   0.00003   0.00006   0.00009   2.11740
   A26        2.08963  -0.00003  -0.00003  -0.00007  -0.00010   2.08953
   A27        2.07624   0.00000   0.00000   0.00001   0.00001   2.07625
   A28        2.05416  -0.00001  -0.00006   0.00000  -0.00006   2.05410
   A29        2.13305   0.00000  -0.00011   0.00010   0.00000   2.13305
   A30        2.09598   0.00001   0.00017  -0.00011   0.00006   2.09604
   A31        2.08220  -0.00001  -0.00019   0.00011  -0.00008   2.08212
   A32        2.07958   0.00000   0.00002  -0.00004  -0.00002   2.07956
   A33        2.12140   0.00002   0.00016  -0.00007   0.00010   2.12150
   A34        2.11053  -0.00002  -0.00016   0.00009  -0.00008   2.11045
   A35        2.13385   0.00003   0.00028  -0.00008   0.00020   2.13405
   A36        2.03880  -0.00002  -0.00012   0.00000  -0.00012   2.03868
   A37        2.14407   0.00001   0.00022  -0.00015   0.00007   2.14414
   A38        2.05957  -0.00001  -0.00020   0.00014  -0.00005   2.05952
   A39        2.07955   0.00000  -0.00002   0.00001  -0.00002   2.07953
   A40        2.05736   0.00001  -0.00004   0.00005   0.00001   2.05736
   A41        2.10093   0.00001  -0.00008   0.00012   0.00004   2.10098
   A42        2.12490  -0.00002   0.00012  -0.00017  -0.00005   2.12485
   A43        1.97579   0.00012   0.00028   0.00024   0.00052   1.97631
    D1        0.00002   0.00000  -0.00002   0.00000  -0.00002   0.00000
    D2        3.14158   0.00000   0.00001  -0.00001   0.00001   3.14159
    D3       -3.14157   0.00000  -0.00003   0.00001  -0.00003  -3.14159
    D4        0.00000   0.00000   0.00000   0.00000   0.00000   0.00000
    D5        0.00003   0.00000  -0.00003   0.00000  -0.00002   0.00000
    D6        3.14158   0.00000   0.00001   0.00000   0.00001  -3.14159
    D7       -3.14158   0.00000  -0.00002   0.00000  -0.00002  -3.14159
    D8       -0.00002   0.00000   0.00002   0.00000   0.00002   0.00000
    D9       -0.00008   0.00001   0.00009  -0.00003   0.00007  -0.00001
   D10        3.14142   0.00001   0.00016  -0.00001   0.00015   3.14157
   D11        3.14155   0.00000   0.00005  -0.00001   0.00004   3.14159
   D12       -0.00014   0.00001   0.00013   0.00000   0.00013  -0.00002
   D13        0.00009  -0.00001  -0.00011   0.00004  -0.00007   0.00002
   D14       -3.14140  -0.00001  -0.00020   0.00001  -0.00019  -3.14159
   D15       -3.14141  -0.00001  -0.00018   0.00002  -0.00016  -3.14156
   D16        0.00028  -0.00001  -0.00027   0.00000  -0.00027   0.00001
   D17       -3.14121  -0.00001  -0.00036  -0.00013  -0.00050   3.14148
   D18       -0.00006   0.00001  -0.00011   0.00023   0.00013   0.00007
   D19        0.00029  -0.00001  -0.00029  -0.00012  -0.00041  -0.00012
   D20        3.14144   0.00001  -0.00003   0.00025   0.00021  -3.14153
   D21       -0.00005   0.00000   0.00006  -0.00003   0.00003  -0.00002
   D22       -3.14157   0.00000  -0.00001  -0.00003  -0.00004   3.14157
   D23        3.14145   0.00001   0.00015   0.00000   0.00014   3.14159
   D24       -0.00008   0.00000   0.00008   0.00000   0.00008   0.00000
   D25       -3.13976  -0.00006  -0.00175  -0.00011  -0.00186   3.14157
   D26       -0.00083   0.00003   0.00078   0.00012   0.00090   0.00007
   D27        0.00193  -0.00006  -0.00184  -0.00014  -0.00197  -0.00004
   D28        3.14087   0.00003   0.00069   0.00009   0.00078  -3.14154
   D29       -0.00001   0.00000   0.00001   0.00001   0.00002   0.00001
   D30       -3.14157   0.00000  -0.00003   0.00001  -0.00002  -3.14159
   D31        3.14151   0.00000   0.00008   0.00001   0.00009  -3.14158
   D32       -0.00004   0.00000   0.00004   0.00001   0.00005   0.00001
   D33        0.00083  -0.00003  -0.00077  -0.00012  -0.00089  -0.00006
   D34       -3.14089  -0.00003  -0.00066  -0.00010  -0.00076   3.14153
   D35        3.13977   0.00006   0.00176   0.00011   0.00187  -3.14155
   D36       -0.00196   0.00006   0.00187   0.00013   0.00200   0.00004
   D37       -0.00029   0.00001   0.00030   0.00012   0.00042   0.00014
   D38        3.14123   0.00001   0.00034   0.00016   0.00050  -3.14145
   D39       -3.14141  -0.00001   0.00003  -0.00027  -0.00024   3.14154
   D40        0.00011  -0.00001   0.00007  -0.00023  -0.00016  -0.00005
   D41       -3.14132  -0.00001  -0.00013  -0.00020  -0.00033   3.14153
   D42       -0.00016   0.00001   0.00012   0.00016   0.00028   0.00012
   D43       -0.00029   0.00001   0.00024   0.00001   0.00025  -0.00004
   D44        3.14137   0.00001   0.00021  -0.00004   0.00017   3.14155
   D45        3.14143   0.00001   0.00013  -0.00001   0.00012   3.14155
   D46       -0.00009   0.00000   0.00010  -0.00005   0.00004  -0.00005
   D47       -3.14144  -0.00001  -0.00014   0.00001  -0.00013  -3.14157
   D48        0.00010   0.00000  -0.00009   0.00001  -0.00008   0.00002
   D49        0.00003   0.00000  -0.00003   0.00003   0.00000   0.00003
   D50        3.14156   0.00000   0.00003   0.00003   0.00005  -3.14157
   D51       -3.14142  -0.00001  -0.00013   0.00000  -0.00014  -3.14156
   D52        0.00016  -0.00001  -0.00011   0.00000  -0.00011   0.00005
   D53        0.00009  -0.00001  -0.00010   0.00004  -0.00006   0.00004
   D54       -3.14150  -0.00001  -0.00007   0.00004  -0.00003  -3.14154
   D55        0.00003   0.00000  -0.00003   0.00000  -0.00003   0.00000
   D56        3.14158   0.00000   0.00002  -0.00002   0.00000   3.14158
   D57       -3.14150  -0.00001  -0.00009   0.00001  -0.00008  -3.14158
   D58        0.00005   0.00000  -0.00004  -0.00001  -0.00005   0.00000
   D59       -0.00003   0.00000   0.00004  -0.00001   0.00003  -0.00001
   D60        3.14156   0.00000   0.00003  -0.00001   0.00002   3.14159
   D61        3.14156   0.00000   0.00001  -0.00001   0.00001   3.14157
   D62       -0.00002   0.00000   0.00000   0.00000   0.00000  -0.00002
   D63       -0.00003   0.00000   0.00003  -0.00001   0.00002  -0.00001
   D64        3.14156   0.00000   0.00004  -0.00002   0.00002   3.14158
   D65       -3.14158   0.00000  -0.00002   0.00001  -0.00001   3.14159
   D66        0.00001   0.00000  -0.00001   0.00000  -0.00001   0.00000
         Item               Value     Threshold  Converged?
 Maximum Force            0.000175     0.000450     YES
 RMS     Force            0.000029     0.000300     YES
 Maximum Displacement     0.002161     0.001800     NO 
 RMS     Displacement     0.000429     0.001200     YES
 Predicted change in Energy=-4.195544D-07
 GradGradGradGradGradGradGradGradGradGradGradGradGradGradGradGradGradGrad

                          Input orientation:                          
 ---------------------------------------------------------------------
 Center     Atomic      Atomic             Coordinates (Angstroms)
 Number     Number       Type             X           Y           Z
 ---------------------------------------------------------------------
      1          6           0       -5.094268    0.066562   -0.000023
      2          6           0       -4.038067    0.994600   -0.000050
      3          6           0       -2.714084    0.547003   -0.000085
      4          6           0       -2.421063   -0.842576   -0.000082
      5          6           0       -3.478460   -1.746657   -0.000068
      6          6           0       -4.809617   -1.288242   -0.000035
      7          1           0       -6.119464    0.416359    0.000003
      8          1           0       -4.245605    2.056296   -0.000047
      9          1           0       -3.255662   -2.805476   -0.000084
     10          1           0       -5.618765   -2.010656   -0.000018
     11          6           0       -1.027171   -1.315980   -0.000113
     12          8           0       -0.767834   -2.541334   -0.000084
     13          6           0       -1.615523    1.478396   -0.000137
     14          6           0        0.048473   -0.323298   -0.000054
     15          6           0       -0.232868    1.073909   -0.000039
     16          6           0        1.381276   -0.745465   -0.000010
     17          6           0        0.814156    1.999549    0.000075
     18          6           0        2.409143    0.217319    0.000078
     19          1           0        1.597948   -1.803399   -0.000040
     20          6           0        2.163611    1.571451    0.000131
     21          1           0        0.640633    3.070135    0.000141
     22          1           0        2.966619    2.295041    0.000213
     23         35           0        4.219514   -0.401487    0.000149
     24          8           0       -1.961503    2.745827   -0.000067
     25          1           0       -1.203989    3.348433   -0.000050
 ---------------------------------------------------------------------
                    Distance matrix (angstroms):
                    1          2          3          4          5
     1  C    0.000000
     2  C    1.405993   0.000000
     3  C    2.428189   1.397596   0.000000
     4  C    2.823571   2.447431   1.420138   0.000000
     5  C    2.428703   2.797794   2.417674   1.391204   0.000000
     6  C    1.384384   2.409701   2.785567   2.429775   1.407879
     7  H    1.083229   2.160226   3.407886   3.906800   3.413728
     8  H    2.163162   1.081790   2.150237   3.425261   3.879557
     9  H    3.410143   3.879786   3.395943   2.132963   1.082006
    10  H    2.142412   3.395610   3.870244   3.404365   2.156525
    11  C    4.295660   3.795296   2.513241   1.472089   2.488835
    12  O    5.051648   4.816353   3.650440   2.370431   2.824713
    13  C    3.754323   2.470380   1.440253   2.456788   3.724446
    14  C    5.157497   4.293794   2.896402   2.523542   3.803316
    15  C    4.964671   3.806025   2.536545   2.908799   4.299937
    16  C    6.526259   5.691846   4.294467   3.803579   4.961796
    17  C    6.216584   4.955199   3.815543   4.306312   5.697422
    18  C    7.504925   6.493896   5.133823   4.945126   6.206534
    19  H    6.948562   6.292335   4.911010   4.132268   5.076726
    20  C    7.412253   6.228449   4.984115   5.181386   6.545442
    21  H    6.473835   5.118406   4.197656   4.968229   6.337856
    22  H    8.363254   7.124379   5.943570   6.234723   7.607520
    23  Br   9.325535   8.374766   6.998172   6.655210   7.814620
    24  O    4.122217   2.716416   2.324049   3.617711   4.741684
    25  H    5.089690   3.684091   3.182514   4.364153   5.579709
                    6          7          8          9         10
     6  C    0.000000
     7  H    2.149736   0.000000
     8  H    3.391761   2.490129   0.000000
     9  H    2.171814   4.310636   4.961533   0.000000
    10  H    1.084712   2.478124   4.292512   2.493189   0.000000
    11  C    3.782548   5.378889   4.661604   2.680443   4.643846
    12  O    4.231578   6.114564   5.764815   2.501812   4.879872
    13  C    4.225698   4.627462   2.692823   4.587114   5.310313
    14  C    4.952995   6.212129   4.909335   4.132617   5.913101
    15  C    5.150377   5.923207   4.131240   4.918019   6.206643
    16  C    6.214641   7.590187   6.285829   5.073938   7.113457
    17  C    6.514323   7.112074   5.060080   6.296959   7.580516
    18  C    7.374090   8.530929   6.904166   6.420849   8.331336
    19  H    6.428241   8.030304   7.003168   4.955976   7.219689
    20  C    7.536827   8.363228   6.427529   6.966062   8.567197
    21  H    6.978587   7.262331   4.990310   7.050101   8.061916
    22  H    8.562113   9.278274   7.216175   8.045624   9.604574
    23  Br   9.072571  10.371275   8.814699   7.852224   9.969009
    24  O    4.938164   4.766032   2.385912   5.700159   5.999974
    25  H    5.873611   5.723544   3.304701   6.486907   6.943347
                   11         12         13         14         15
    11  C    0.000000
    12  O    1.252497   0.000000
    13  C    2.855642   4.108139   0.000000
    14  C    1.463704   2.363481   2.452547   0.000000
    15  C    2.518429   3.654609   1.440606   1.425250   0.000000
    16  C    2.475097   2.800682   3.731804   1.398066   2.432197
    17  C    3.792521   4.808566   2.484944   2.445790   1.397523
    18  C    3.762879   4.207534   4.217612   2.421781   2.777403
    19  H    2.669987   2.478199   4.593101   2.142796   3.410394
    20  C    4.303295   5.050581   3.780280   2.839697   2.447583
    21  H    4.692502   5.785530   2.761137   3.444712   2.178973
    22  H    5.384220   6.110373   4.654346   3.920621   3.424600
    23  Br   5.325786   5.427023   6.130384   4.171773   4.690469
    24  O    4.167883   5.420232   1.313805   3.668723   2.404889
    25  H    4.667763   5.905894   1.914784   3.879467   2.473163
                   16         17         18         19         20
    16  C    0.000000
    17  C    2.802985   0.000000
    18  C    1.408354   2.391720   0.000000
    19  H    1.079895   3.882878   2.177461   0.000000
    20  C    2.445433   1.415731   1.376212   3.421927   0.000000
    21  H    3.886818   1.084558   3.356515   4.966668   2.136707
    22  H    3.428992   2.172651   2.151211   4.320934   1.080928
    23  Br   2.859006   4.166705   1.913208   2.972871   2.849424
    24  O    4.833559   2.874233   5.049346   5.776258   4.289024
    25  H    4.841858   2.427426   4.781066   5.864488   3.807676
                   21         22         23         24         25
    21  H    0.000000
    22  H    2.451731   0.000000
    23  Br   4.986035   2.973382   0.000000
    24  O    2.622268   4.948697   6.936177   0.000000
    25  H    1.865497   4.301582   6.593654   0.967968   0.000000
 Stoichiometry    C14H8BrO2(2)
 Framework group  C1[X(C14H8BrO2)]
 Deg. of freedom    69
 Full point group                 C1      NOp   1
 Largest Abelian subgroup         C1      NOp   1
 Largest concise Abelian subgroup C1      NOp   1
                         Standard orientation:                         
 ---------------------------------------------------------------------
 Center     Atomic      Atomic             Coordinates (Angstroms)
 Number     Number       Type             X           Y           Z
 ---------------------------------------------------------------------
      1          6           0        5.086926    0.025686    0.000035
      2          6           0        4.035299    0.958905    0.000062
      3          6           0        2.709132    0.517820    0.000097
      4          6           0        2.409285   -0.870303    0.000094
      5          6           0        3.462226   -1.779569    0.000080
      6          6           0        4.795620   -1.327702    0.000046
      7          1           0        6.113829    0.370441    0.000009
      8          1           0        4.248052    2.019567    0.000058
      9          1           0        3.234227   -2.837281    0.000096
     10          1           0        5.601207   -2.054084    0.000029
     11          6           0        1.013083   -1.336849    0.000125
     12          8           0        0.747727   -2.560914    0.000096
     13          6           0        1.615162    1.454601    0.000148
     14          6           0       -0.057670   -0.338893    0.000065
     15          6           0        0.230536    1.056914    0.000050
     16          6           0       -1.392531   -0.754504    0.000022
     17          6           0       -0.811927    1.987689   -0.000063
     18          6           0       -2.415653    0.213319   -0.000067
     19          1           0       -1.614400   -1.811361    0.000052
     20          6           0       -2.163469    1.566228   -0.000119
     21          1           0       -0.633144    3.057409   -0.000129
     22          1           0       -2.962912    2.293756   -0.000202
     23         35           0       -4.229044   -0.396581   -0.000138
     24          8           0        1.967367    2.720316    0.000079
     25          1           0        1.212823    3.326638    0.000062
 ---------------------------------------------------------------------
 Rotational constants (GHZ):      0.9922212      0.1761294      0.1495778
 Standard basis: 6-311G(d) (5D, 7F)
 There are   375 symmetry adapted cartesian basis functions of A   symmetry.
 There are   356 symmetry adapted basis functions of A   symmetry.
   356 basis functions,   642 primitive gaussians,   375 cartesian basis functions
    72 alpha electrons       71 beta electrons
       nuclear repulsion energy      1392.1007324573 Hartrees.
 NAtoms=   25 NActive=   25 NUniq=   25 SFac= 1.00D+00 NAtFMM=   60 NAOKFM=F Big=F
 Integral buffers will be    262144 words long.
 Raffenetti 2 integral format.
 Two-electron integral symmetry is turned on.
 Nuclear repulsion after empirical dispersion term =     1392.0374052629 Hartrees.
 ------------------------------------------------------------------------------
 Polarizable Continuum Model (PCM)
 =================================
 Model                : PCM (using non-symmetric T matrix).
 Atomic radii         : UFF (Universal Force Field).
 Polarization charges : Total charges.
 Charge compensation  : None.
 Solution method      : On-the-fly selection.
 Cavity type          : Scaled VdW (van der Waals Surface) (Alpha=1.100).
 Cavity algorithm     : GePol (No added spheres)
                        Default sphere list used, NSphG=   25.
                        Lebedev-Laikov grids with approx.  5.0 points / Ang**2.
                        Smoothing algorithm: Karplus/York (Gamma=1.0000).
                        Polarization charges: spherical gaussians, with
                                              point-specific exponents (IZeta= 3).
                        Self-potential: point-specific (ISelfS= 7).
                        Self-field    : sphere-specific E.n sum rule (ISelfD= 2).
 1st derivatives      : Analytical E(r).r(x)/FMM algorithm (CHGder, D1EAlg=3).
                        Cavity 1st derivative terms included.
 Solvent              : Acetonitrile, Eps=  35.688000 Eps(inf)=   1.806874
 ------------------------------------------------------------------------------
 One-electron integrals computed using PRISM.
 NBasis=   356 RedAO= T EigKep=  8.65D-05  NBF=   356
 NBsUse=   356 1.00D-06 EigRej= -1.00D+00 NBFU=   356
 Initial guess from the checkpoint file:  "C:\Users\Shengfu Liao\Desktop\suppliment.chk"
 B after Tr=     0.000000    0.000000    0.000000
         Rot=    1.000000   -0.000040    0.000039   -0.000007 Ang=  -0.01 deg.
 Initial guess <Sx>= 0.0000 <Sy>= 0.0000 <Sz>= 0.5000 <S**2>= 0.7725 S= 0.5112
 Requested convergence on RMS density matrix=1.00D-08 within 128 cycles.
 Requested convergence on MAX density matrix=1.00D-06.
 Requested convergence on             energy=1.00D-06.
 No special actions if energy rises.
 Inv3:  Mode=1 IEnd=    14454075.
 Iteration    1 A*A^-1 deviation from unit magnitude is 2.44D-15 for    112.
 Iteration    1 A*A^-1 deviation from orthogonality  is 2.30D-15 for   1476   1285.
 Iteration    1 A^-1*A deviation from unit magnitude is 2.22D-15 for    112.
 Iteration    1 A^-1*A deviation from orthogonality  is 2.98D-12 for   2040   1477.
 Error on total polarization charges =  0.01435
 SCF Done:  E(UB3LYP) =  -3263.11812706     A.U. after    8 cycles
            NFock=  8  Conv=0.72D-08     -V/T= 2.0018
 <Sx>= 0.0000 <Sy>= 0.0000 <Sz>= 0.5000 <S**2>= 0.7725 S= 0.5112
 <L.S>= 0.000000000000E+00
 Annihilation of the first spin contaminant:
 S**2 before annihilation     0.7725,   after     0.7504
 DoSCS=F DFT=T ScalE2(SS,OS)=  1.000000  1.000000
 ExpMin= 1.03D-01 ExpMax= 4.40D+05 ExpMxC= 1.51D+04 IAcc=3 IRadAn=         5 AccDes= 0.00D+00
 HarFok:  IExCor=  205 AccDes= 0.00D+00 IRadAn=         5 IDoV=-2 UseB2=F ITyADJ=14
 ICtDFT= 12500011 ScaDFX=  1.000000  1.000000  1.000000  1.000000
 Range of M.O.s used for correlation:    31   356
 NBasis=   356 NAE=    72 NBE=    71 NFC=    30 NFV=     0
 NROrb=    326 NOA=    42 NOB=    41 NVA=   284 NVB=   285

 **** Warning!!: The largest alpha MO coefficient is  0.25020806D+02


 **** Warning!!: The smallest alpha delta epsilon is  0.97276607D-01


 **** Warning!!: The largest beta MO coefficient is  0.23796024D+02

 Ignoring spin specification with unrestricted ground state.
 NEqPCM:  Using equilibrium solvation (IEInf=0, Eps=  35.6880, EpsInf=   1.8069)
 Orbital symmetries:
 Alpha Orbitals:
       Occupied  (A) (A) (A) (A) (A) (A) (A) (A) (A) (A) (A) (A)
                 (A) (A) (A) (A) (A) (A) (A) (A) (A) (A) (A) (A)
                 (A) (A) (A) (A) (A) (A) (A) (A) (A) (A) (A) (A)
                 (A) (A) (A) (A) (A) (A) (A) (A) (A) (A) (A) (A)
                 (A) (A) (A) (A) (A) (A) (A) (A) (A) (A) (A) (A)
                 (A) (A) (A) (A) (A) (A) (A) (A) (A) (A) (A) (A)
       Virtual   (A) (A) (A) (A) (A) (A) (A) (A) (A) (A) (A) (A)
                 (A) (A) (A) (A) (A) (A) (A) (A) (A) (A) (A) (A)
                 (A) (A) (A) (A) (A) (A) (A) (A) (A) (A) (A) (A)
                 (A) (A) (A) (A) (A) (A) (A) (A) (A) (A) (A) (A)
                 (A) (A) (A) (A) (A) (A) (A) (A) (A) (A) (A) (A)
                 (A) (A) (A) (A) (A) (A) (A) (A) (A) (A) (A) (A)
                 (A) (A) (A) (A) (A) (A) (A) (A) (A) (A) (A) (A)
                 (A) (A) (A) (A) (A) (A) (A) (A) (A) (A) (A) (A)
                 (A) (A) (A) (A) (A) (A) (A) (A) (A) (A) (A) (A)
                 (A) (A) (A) (A) (A) (A) (A) (A) (A) (A) (A) (A)
                 (A) (A) (A) (A) (A) (A) (A) (A) (A) (A) (A) (A)
                 (A) (A) (A) (A) (A) (A) (A) (A) (A) (A) (A) (A)
                 (A) (A) (A) (A) (A) (A) (A) (A) (A) (A) (A) (A)
                 (A) (A) (A) (A) (A) (A) (A) (A) (A) (A) (A) (A)
                 (A) (A) (A) (A) (A) (A) (A) (A) (A) (A) (A) (A)
                 (A) (A) (A) (A) (A) (A) (A) (A) (A) (A) (A) (A)
                 (A) (A) (A) (A) (A) (A) (A) (A) (A) (A) (A) (A)
                 (A) (A) (A) (A) (A) (A) (A) (A) (A) (A) (A) (A)
                 (A) (A) (A) (A) (A) (A) (A) (A) (A) (A) (A) (A)
                 (A) (A) (A) (A) (A) (A) (A) (A) (A) (A) (A) (A)
                 (A) (A) (A) (A) (A) (A) (A) (A) (A) (A) (A) (A)
                 (A) (A) (A) (A) (A) (A) (A) (A) (A) (A) (A) (A)
                 (A) (A) (A) (A) (A) (A) (A) (A) (A) (A) (A) (A)
                 (A) (A) (A) (A) (A) (A) (A) (A)
 Beta  Orbitals:
       Occupied  (A) (A) (A) (A) (A) (A) (A) (A) (A) (A) (A) (A)
                 (A) (A) (A) (A) (A) (A) (A) (A) (A) (A) (A) (A)
                 (A) (A) (A) (A) (A) (A) (A) (A) (A) (A) (A) (A)
                 (A) (A) (A) (A) (A) (A) (A) (A) (A) (A) (A) (A)
                 (A) (A) (A) (A) (A) (A) (A) (A) (A) (A) (A) (A)
                 (A) (A) (A) (A) (A) (A) (A) (A) (A) (A) (A)
       Virtual   (A) (A) (A) (A) (A) (A) (A) (A) (A) (A) (A) (A)
                 (A) (A) (A) (A) (A) (A) (A) (A) (A) (A) (A) (A)
                 (A) (A) (A) (A) (A) (A) (A) (A) (A) (A) (A) (A)
                 (A) (A) (A) (A) (A) (A) (A) (A) (A) (A) (A) (A)
                 (A) (A) (A) (A) (A) (A) (A) (A) (A) (A) (A) (A)
                 (A) (A) (A) (A) (A) (A) (A) (A) (A) (A) (A) (A)
                 (A) (A) (A) (A) (A) (A) (A) (A) (A) (A) (A) (A)
                 (A) (A) (A) (A) (A) (A) (A) (A) (A) (A) (A) (A)
                 (A) (A) (A) (A) (A) (A) (A) (A) (A) (A) (A) (A)
                 (A) (A) (A) (A) (A) (A) (A) (A) (A) (A) (A) (A)
                 (A) (A) (A) (A) (A) (A) (A) (A) (A) (A) (A) (A)
                 (A) (A) (A) (A) (A) (A) (A) (A) (A) (A) (A) (A)
                 (A) (A) (A) (A) (A) (A) (A) (A) (A) (A) (A) (A)
                 (A) (A) (A) (A) (A) (A) (A) (A) (A) (A) (A) (A)
                 (A) (A) (A) (A) (A) (A) (A) (A) (A) (A) (A) (A)
                 (A) (A) (A) (A) (A) (A) (A) (A) (A) (A) (A) (A)
                 (A) (A) (A) (A) (A) (A) (A) (A) (A) (A) (A) (A)
                 (A) (A) (A) (A) (A) (A) (A) (A) (A) (A) (A) (A)
                 (A) (A) (A) (A) (A) (A) (A) (A) (A) (A) (A) (A)
                 (A) (A) (A) (A) (A) (A) (A) (A) (A) (A) (A) (A)
                 (A) (A) (A) (A) (A) (A) (A) (A) (A) (A) (A) (A)
                 (A) (A) (A) (A) (A) (A) (A) (A) (A) (A) (A) (A)
                 (A) (A) (A) (A) (A) (A) (A) (A) (A) (A) (A) (A)
                 (A) (A) (A) (A) (A) (A) (A) (A) (A)
 Generating guess from densities on rwf.
 Convergence on wavefunction:    0.000001000000000
 Iteration     1 Dimension    10 NMult     0 NNew     10
 CISAX will form    10 AO SS matrices at one time.
 Iteration     2 Dimension    20 NMult    10 NNew     10
 Iteration     3 Dimension    30 NMult    20 NNew     10
 Iteration     4 Dimension    40 NMult    30 NNew     10
 Iteration     5 Dimension    50 NMult    40 NNew     10
 Iteration     6 Dimension    60 NMult    50 NNew     10
 Iteration     7 Dimension    70 NMult    60 NNew     10
 Iteration     8 Dimension    78 NMult    70 NNew      8
 Iteration     9 Dimension    82 NMult    78 NNew      4
 Iteration    10 Dimension    84 NMult    82 NNew      2
 Iteration    11 Dimension    86 NMult    84 NNew      2
 ***********************************************************************
 Excited states from <AA,BB:AA,BB> singles matrix:
 ***********************************************************************
 
 ExtSpn:  IState=     1 X2= 1.009 Y2= 0.009 X2-Y2-1= 4.22D-15
          S2Grnd=  0.772 Ra=  0.005 Rb=  0.007 T=  0.000 S2Ext=  0.012 S2=  0.785
 ExtSpn:  IState=     2 X2= 1.002 Y2= 0.002 X2-Y2-1= 8.88D-16
          S2Grnd=  0.772 Ra=  0.017 Rb=  0.189 T=  0.114 S2Ext=  0.319 S2=  1.092
 ExtSpn:  IState=     3 X2= 1.012 Y2= 0.012 X2-Y2-1= 3.55D-15
          S2Grnd=  0.772 Ra=  0.045 Rb=  0.042 T=  0.081 S2Ext=  0.168 S2=  0.940
 ExtSpn:  IState=     4 X2= 1.011 Y2= 0.011 X2-Y2-1= 5.55D-15
          S2Grnd=  0.772 Ra=  0.090 Rb=  0.098 T=  0.176 S2Ext=  0.364 S2=  1.137
 ExtSpn:  IState=     5 X2= 1.006 Y2= 0.006 X2-Y2-1= 5.11D-15
          S2Grnd=  0.772 Ra=  0.029 Rb=  0.041 T=  0.015 S2Ext=  0.085 S2=  0.858
 Ground to excited state transition densities written to RWF  633
 Ground to excited state transition electric dipole moments (Au):
       state          X           Y           Z        Dip. S.      Osc.
         1         0.1396      0.8281      0.0000      0.7053      0.0298
         2         0.0000      0.0000      0.0005      0.0000      0.0000
         3         0.6554     -0.1269      0.0000      0.4456      0.0308
         4        -0.1197     -0.5820      0.0000      0.3531      0.0260
         5        -2.1357      0.3345      0.0000      4.6730      0.3580
 Ground to excited state transition velocity dipole moments (Au):
       state          X           Y           Z        Dip. S.      Osc.
         1        -0.0115     -0.0645      0.0000      0.0043      0.0452
         2         0.0000      0.0000     -0.0002      0.0000      0.0000
         3        -0.0703      0.0131      0.0000      0.0051      0.0328
         4         0.0139      0.0632      0.0000      0.0042      0.0252
         5         0.2447     -0.0388      0.0000      0.0614      0.3561
 Ground to excited state transition magnetic dipole moments (Au):
       state          X           Y           Z
         1         0.0000      0.0000     -0.0760
         2        -0.0806     -0.3752      0.0000
         3         0.0000      0.0000     -0.2665
         4         0.0000      0.0000      0.2487
         5         0.0000      0.0000     -1.3626
 Ground to excited state transition velocity quadrupole moments (Au):
       state          XX          YY          ZZ          XY          XZ          YZ
         1        -0.1648     -0.0122      0.0002     -0.1398      0.0000      0.0000
         2         0.0000      0.0000      0.0000      0.0000      0.0091     -0.0013
         3        -0.4337      0.0476      0.0005     -0.0857      0.0000      0.0000
         4         0.5729     -0.0985      0.0129      0.0649      0.0000      0.0000
         5         0.5705      0.1353     -0.0104     -0.3158      0.0000      0.0000
 <0|del|b> * <b|rxdel|0> + <0|del|b> * <b|delr+rdel|0>
 Rotatory Strengths (R) in cgs (10**-40 erg-esu-cm/Gauss)
       state          XX          YY          ZZ    R(velocity)    E-M Angle
         1        -0.0086      0.0029     -0.0023     -0.0027       90.00
         2         0.0012     -0.0012      0.0000      0.0000       90.00
         3         0.0011      0.0019     -0.0019      0.0004       90.00
         4        -0.0024     -0.0013      0.0026     -0.0004       90.00
         5        -0.0296      0.0063      0.0250      0.0006       90.00
 1/2[<0|r|b>*<b|rxdel|0> + (<0|rxdel|b>*<b|r|0>)*]
 Rotatory Strengths (R) in cgs (10**-40 erg-esu-cm/Gauss)
       state          XX          YY          ZZ     R(length)
         1         0.0033     -0.0102     -0.0003     -0.0024
         2        -0.0024      0.0019      0.0000     -0.0001
         3         0.0001     -0.0015      0.0026      0.0004
         4         0.0000      0.0032     -0.0044     -0.0004
         5         0.0508     -0.0066     -0.0444      0.0000
  1/2[<0|del|b>*<b|r|0> + (<0|r|b>*<b|del|0>)*] (Au)
       state          X           Y           Z        Dip. S.   Osc.(frdel)
         1        -0.0016     -0.0534      0.0000      0.0550      0.0367
         2         0.0000      0.0000      0.0000      0.0000      0.0000
         3        -0.0461     -0.0017      0.0000      0.0477      0.0318
         4        -0.0017     -0.0368      0.0000      0.0384      0.0256
         5        -0.5225     -0.0130      0.0000      0.5355      0.3570

 Excitation energies and oscillator strengths:
 
 Excited State   1:  2.034-A      1.7251 eV  718.73 nm  f=0.0298  <S**2>=0.785
     72A -> 73A        0.98219
     69B -> 72B        0.12057
 This state for optimization and/or second-order correction.
 Total Energy, E(TD-HF/TD-KS) =  -3263.05473252    
 Copying the excited state density for this state as the 1-particle RhoCI density.
 
 Excited State   2:  2.317-A      2.4276 eV  510.72 nm  f=0.0000  <S**2>=1.092
     70A -> 73A       -0.12452
     71B -> 72B        0.93846
     71B -> 73B        0.28846
     71B -> 79B       -0.11842
 
 Excited State   3:  2.182-A      2.8241 eV  439.02 nm  f=0.0308  <S**2>=0.940
     72A -> 74A        0.67954
     72A -> 75A        0.13804
     68B -> 73B        0.10855
     69B -> 72B        0.12836
     70B -> 72B        0.63497
 
 Excited State   4:  2.355-A      3.0116 eV  411.69 nm  f=0.0260  <S**2>=1.137
     68A -> 73A       -0.17856
     69A -> 73A        0.12934
     72A -> 75A        0.33933
     67B -> 72B        0.10682
     68B -> 73B        0.13200
     69B -> 72B        0.78212
     69B -> 73B        0.11592
     70B -> 72B       -0.30951
 
 Excited State   5:  2.105-A      3.1268 eV  396.52 nm  f=0.3580  <S**2>=0.858
     71A -> 73A        0.10321
     72A -> 74A       -0.70652
     72A -> 75A        0.30012
     68B -> 73B        0.13584
     69B -> 72B        0.13551
     70B -> 72B        0.57052
 SavETr:  write IOETrn=   770 NScale= 10 NData=  16 NLR=1 NState=    5 LETran=      96.
          IDoAtm=1111111111111111111111111
 NEqPCM:  Using equilibrium solvation (IEInf=0, Eps=  35.6880, EpsInf=   1.8069)
          Differentiating once with respect to electric field.
                with respect to dipole field.
          Differentiating once with respect to nuclear coordinates.
          There are     1 degrees of freedom in the 1st order CPHF.  IDoFFX=0 NUNeed=     1.
 LinEq1:  Iter=  0 NonCon=     1 RMS=2.63D-03 Max=1.96D-01 NDo=     1
 AX will form     1 AO Fock derivatives at one time.
 LinEq1:  Iter=  1 NonCon=     1 RMS=1.86D-03 Max=1.58D-01 NDo=     1
 LinEq1:  Iter=  2 NonCon=     1 RMS=1.01D-03 Max=6.66D-02 NDo=     1
 LinEq1:  Iter=  3 NonCon=     1 RMS=7.50D-04 Max=3.13D-02 NDo=     1
 LinEq1:  Iter=  4 NonCon=     1 RMS=5.56D-04 Max=2.44D-02 NDo=     1
 LinEq1:  Iter=  5 NonCon=     1 RMS=3.74D-04 Max=1.81D-02 NDo=     1
 LinEq1:  Iter=  6 NonCon=     1 RMS=3.04D-04 Max=1.71D-02 NDo=     1
 LinEq1:  Iter=  7 NonCon=     1 RMS=2.01D-04 Max=1.34D-02 NDo=     1
 LinEq1:  Iter=  8 NonCon=     1 RMS=1.63D-04 Max=1.25D-02 NDo=     1
 LinEq1:  Iter=  9 NonCon=     1 RMS=7.98D-05 Max=3.80D-03 NDo=     1
 LinEq1:  Iter= 10 NonCon=     1 RMS=4.88D-05 Max=2.62D-03 NDo=     1
 LinEq1:  Iter= 11 NonCon=     1 RMS=2.78D-05 Max=1.02D-03 NDo=     1
 LinEq1:  Iter= 12 NonCon=     1 RMS=1.34D-05 Max=4.73D-04 NDo=     1
 LinEq1:  Iter= 13 NonCon=     1 RMS=1.05D-05 Max=4.55D-04 NDo=     1
 LinEq1:  Iter= 14 NonCon=     1 RMS=6.94D-06 Max=3.13D-04 NDo=     1
 LinEq1:  Iter= 15 NonCon=     1 RMS=4.05D-06 Max=1.96D-04 NDo=     1
 LinEq1:  Iter= 16 NonCon=     1 RMS=2.72D-06 Max=1.48D-04 NDo=     1
 LinEq1:  Iter= 17 NonCon=     1 RMS=1.75D-06 Max=6.29D-05 NDo=     1
 LinEq1:  Iter= 18 NonCon=     1 RMS=8.82D-07 Max=3.86D-05 NDo=     1
 LinEq1:  Iter= 19 NonCon=     1 RMS=6.55D-07 Max=2.70D-05 NDo=     1
 LinEq1:  Iter= 20 NonCon=     1 RMS=3.93D-07 Max=2.30D-05 NDo=     1
 LinEq1:  Iter= 21 NonCon=     1 RMS=2.00D-07 Max=9.15D-06 NDo=     1
 LinEq1:  Iter= 22 NonCon=     1 RMS=1.38D-07 Max=4.94D-06 NDo=     1
 LinEq1:  Iter= 23 NonCon=     1 RMS=7.35D-08 Max=2.43D-06 NDo=     1
 LinEq1:  Iter= 24 NonCon=     1 RMS=4.61D-08 Max=1.37D-06 NDo=     1
 LinEq1:  Iter= 25 NonCon=     1 RMS=2.56D-08 Max=9.52D-07 NDo=     1
 LinEq1:  Iter= 26 NonCon=     1 RMS=1.75D-08 Max=5.62D-07 NDo=     1
 LinEq1:  Iter= 27 NonCon=     1 RMS=7.53D-09 Max=3.54D-07 NDo=     1
 LinEq1:  Iter= 28 NonCon=     1 RMS=3.42D-09 Max=1.13D-07 NDo=     1
 LinEq1:  Iter= 29 NonCon=     1 RMS=2.58D-09 Max=9.69D-08 NDo=     1
 LinEq1:  Iter= 30 NonCon=     1 RMS=9.08D-10 Max=3.11D-08 NDo=     1
 LinEq1:  Iter= 31 NonCon=     1 RMS=3.54D-10 Max=1.45D-08 NDo=     1
 LinEq1:  Iter= 32 NonCon=     1 RMS=2.30D-10 Max=1.03D-08 NDo=     1
 LinEq1:  Iter= 33 NonCon=     1 RMS=8.79D-11 Max=2.85D-09 NDo=     1
 LinEq1:  Iter= 34 NonCon=     0 RMS=2.97D-11 Max=9.47D-10 NDo=     1
 Linear equations converged to 1.000D-10 1.000D-09 after    34 iterations.
 End of Minotr F.D. properties file   721 does not exist.
 End of Minotr F.D. properties file   722 does not exist.
 End of Minotr F.D. properties file   788 does not exist.
 D1PCM: PCM CHGder 1st derivatives, ID1Alg=3 FixD1E=F DoIter=F DoCFld=F I1PDM=6.
 Calling FoFJK, ICntrl=  10005127 FMM=F ISym2X=0 I1Cent= 0 IOpClX= 1 NMat=1 NMatS=1 NMatT=0.
 ***** Axes restored to original set *****
 -------------------------------------------------------------------
 Center     Atomic                   Forces (Hartrees/Bohr)
 Number     Number              X              Y              Z
 -------------------------------------------------------------------
      1        6          -0.000000763   -0.000023942    0.000000440
      2        6           0.000008327    0.000003259   -0.000000658
      3        6          -0.000033550    0.000003076   -0.000004534
      4        6           0.000015497    0.000002406   -0.000005129
      5        6          -0.000007468   -0.000024255    0.000000880
      6        6           0.000009169    0.000006409   -0.000000143
      7        1           0.000000503   -0.000009574    0.000000052
      8        1          -0.000000845   -0.000006259   -0.000000077
      9        1           0.000008073   -0.000000724    0.000000643
     10        1           0.000004282   -0.000011242   -0.000000215
     11        6          -0.000005973   -0.000002713    0.000006761
     12        8           0.000009334   -0.000005728   -0.000002965
     13        6           0.000027206   -0.000024755    0.000020023
     14        6          -0.000015722    0.000026174   -0.000005193
     15        6          -0.000011734   -0.000006855   -0.000002585
     16        6           0.000018596   -0.000013783    0.000000618
     17        6          -0.000008942    0.000019853   -0.000000725
     18        6           0.000014349    0.000006588    0.000000366
     19        1           0.000000357    0.000008376    0.000000585
     20        6          -0.000012670    0.000012111    0.000000348
     21        1          -0.000002006    0.000005199   -0.000000892
     22        1          -0.000000949    0.000006421   -0.000000050
     23       35          -0.000003053    0.000012686   -0.000000285
     24        8          -0.000003405    0.000006619   -0.000006368
     25        1          -0.000008612    0.000010652   -0.000000898
 -------------------------------------------------------------------
 Cartesian Forces:  Max     0.000033550 RMS     0.000010636

 GradGradGradGradGradGradGradGradGradGradGradGradGradGradGradGradGradGrad
 Berny optimization.
 Using GEDIIS/GDIIS optimizer.
 FormGI is forming the generalized inverse of G from B-inverse, IUseBI=4.
 Internal  Forces:  Max     0.000017875 RMS     0.000004711
 Search for a local minimum.
 Step number   8 out of a maximum of  146
 All quantities printed in internal units (Hartrees-Bohrs-Radians)
 Mixed Optimization -- En-DIIS/RFO-DIIS
 Swapping is turned off.
 Update second derivatives using D2CorX and points    1    2    3    4    5
                                                      6    7    8
 DE= -4.79D-07 DEPred=-4.20D-07 R= 1.14D+00
 Trust test= 1.14D+00 RLast= 4.47D-03 DXMaxT set to 2.52D-01
 ITU=  0 -1  1  1  1  1  1  0
     Eigenvalues ---    0.00896   0.01189   0.01538   0.01598   0.01672
     Eigenvalues ---    0.01729   0.01794   0.01857   0.02140   0.02148
     Eigenvalues ---    0.02155   0.02163   0.02168   0.02170   0.02177
     Eigenvalues ---    0.02183   0.02190   0.02193   0.02199   0.02216
     Eigenvalues ---    0.03325   0.04048   0.13969   0.15556   0.15997
     Eigenvalues ---    0.16000   0.16009   0.16021   0.16114   0.16797
     Eigenvalues ---    0.17897   0.20815   0.21691   0.22018   0.22620
     Eigenvalues ---    0.22920   0.24464   0.24771   0.24889   0.25001
     Eigenvalues ---    0.25059   0.25227   0.28935   0.31788   0.32660
     Eigenvalues ---    0.34277   0.35473   0.35477   0.35574   0.35605
     Eigenvalues ---    0.35655   0.35681   0.35958   0.38557   0.39877
     Eigenvalues ---    0.40899   0.42183   0.42909   0.43587   0.44669
     Eigenvalues ---    0.45668   0.46099   0.46738   0.47023   0.47216
     Eigenvalues ---    0.49511   0.56135   0.65770   0.94731
 En-DIIS/RFO-DIIS IScMMF=        0 using points:     8    7    6    5    4
 RFO step:  Lambda= 0.00000000D+00.
 DidBck=F Rises=F RFO-DIIS coefs:    0.92120    0.02373    0.01817    0.03140    0.00550
 Iteration  1 RMS(Cart)=  0.00006515 RMS(Int)=  0.00000001
 Iteration  2 RMS(Cart)=  0.00000001 RMS(Int)=  0.00000001
 Variable       Old X    -DE/DX   Delta X   Delta X   Delta X     New X
                                 (Linear)    (Quad)   (Total)
    R1        2.65694   0.00001   0.00002   0.00000   0.00002   2.65696
    R2        2.61611   0.00000  -0.00001   0.00000  -0.00001   2.61609
    R3        2.04701   0.00000   0.00000   0.00000   0.00000   2.04700
    R4        2.64107  -0.00001  -0.00003   0.00000  -0.00002   2.64105
    R5        2.04429   0.00000   0.00000   0.00000   0.00000   2.04428
    R6        2.68367   0.00001   0.00001   0.00001   0.00002   2.68369
    R7        2.72168   0.00001   0.00003   0.00001   0.00004   2.72173
    R8        2.62900   0.00001   0.00000   0.00002   0.00002   2.62902
    R9        2.78184   0.00000   0.00001  -0.00002  -0.00001   2.78184
   R10        2.66051   0.00000   0.00000  -0.00001  -0.00001   2.66050
   R11        2.04470   0.00000   0.00000   0.00000  -0.00001   2.04469
   R12        2.04981   0.00000   0.00000   0.00000   0.00001   2.04981
   R13        2.36688   0.00001   0.00000   0.00000   0.00001   2.36688
   R14        2.76600   0.00001  -0.00001   0.00003   0.00001   2.76601
   R15        2.72235  -0.00002   0.00000  -0.00005  -0.00005   2.72230
   R16        2.48273   0.00002  -0.00001   0.00003   0.00002   2.48275
   R17        2.69333  -0.00001   0.00000  -0.00002  -0.00001   2.69332
   R18        2.64196   0.00002   0.00002   0.00002   0.00004   2.64200
   R19        2.64094   0.00001  -0.00001   0.00003   0.00002   2.64095
   R20        2.66140   0.00001   0.00000   0.00001   0.00001   2.66142
   R21        2.04071   0.00000  -0.00001   0.00000  -0.00001   2.04070
   R22        2.67534   0.00000   0.00005  -0.00004   0.00001   2.67536
   R23        2.04952   0.00000   0.00000   0.00000   0.00000   2.04952
   R24        2.60066   0.00001  -0.00002   0.00004   0.00001   2.60068
   R25        3.61544   0.00000   0.00003  -0.00005  -0.00002   3.61542
   R26        2.04266   0.00000   0.00000   0.00000   0.00000   2.04266
   R27        1.82919   0.00000   0.00000   0.00001   0.00001   1.82920
    A1        2.08460   0.00000   0.00001   0.00001   0.00002   2.08462
    A2        2.09188   0.00000  -0.00002   0.00000  -0.00001   2.09187
    A3        2.10670   0.00000   0.00001  -0.00001   0.00000   2.10670
    A4        2.09469  -0.00001  -0.00001  -0.00002  -0.00003   2.09466
    A5        2.09865   0.00001   0.00000   0.00004   0.00003   2.09868
    A6        2.08985   0.00000   0.00002  -0.00002   0.00000   2.08984
    A7        2.10463   0.00000   0.00001   0.00001   0.00002   2.10464
    A8        2.11235   0.00000   0.00001   0.00000   0.00002   2.11237
    A9        2.06620  -0.00001  -0.00002  -0.00001  -0.00003   2.06617
   A10        2.07036   0.00000   0.00000   0.00001   0.00001   2.07037
   A11        2.10603   0.00000   0.00000   0.00001   0.00000   2.10603
   A12        2.10680   0.00000   0.00000  -0.00001  -0.00001   2.10678
   A13        2.10255  -0.00001  -0.00001  -0.00002  -0.00003   2.10251
   A14        2.07079   0.00000   0.00001   0.00000   0.00000   2.07080
   A15        2.10984   0.00001   0.00001   0.00002   0.00003   2.10988
   A16        2.10954   0.00000   0.00001   0.00002   0.00002   2.10956
   A17        2.09253   0.00000   0.00000  -0.00001   0.00000   2.09253
   A18        2.08111   0.00000  -0.00001  -0.00001  -0.00002   2.08109
   A19        2.10677   0.00000  -0.00001   0.00002   0.00001   2.10678
   A20        2.06888   0.00000   0.00001  -0.00002  -0.00001   2.06887
   A21        2.10754   0.00000   0.00000   0.00000  -0.00001   2.10753
   A22        2.15376   0.00001   0.00002   0.00002   0.00003   2.15379
[truncated: 77,581 more chars]
