# Supplementary material for: 2-Bromoanthraquinone as a highly efficient photocatalyst for the oxidation of sec-aromatic alcohols: experimental and DFT study
Source: Royal Society of Chemistry journal article supplement (doi:10.1039/d0ra06414a), 2020-01-01
Supplement: d0ra06414a8.out [file d0ra06414a8.out]

 Entering Link 1 = E:\Gaussian\G09W\l1.exe PID=    153904.
  
 Copyright (c) 1988,1990,1992,1993,1995,1998,2003,2009,2013,
            Gaussian, Inc.  All Rights Reserved.
  
 This is part of the Gaussian(R) 09 program.  It is based on
 the Gaussian(R) 03 system (copyright 2003, Gaussian, Inc.),
 the Gaussian(R) 98 system (copyright 1998, Gaussian, Inc.),
 the Gaussian(R) 94 system (copyright 1995, Gaussian, Inc.),
 the Gaussian 92(TM) system (copyright 1992, Gaussian, Inc.),
 the Gaussian 90(TM) system (copyright 1990, Gaussian, Inc.),
 the Gaussian 88(TM) system (copyright 1988, Gaussian, Inc.),
 the Gaussian 86(TM) system (copyright 1986, Carnegie Mellon
 University), and the Gaussian 82(TM) system (copyright 1983,
 Carnegie Mellon University). Gaussian is a federally registered
 trademark of Gaussian, Inc.
  
 This software contains proprietary and confidential information,
 including trade secrets, belonging to Gaussian, Inc.
  
 This software is provided under written license and may be
 used, copied, transmitted, or stored only in accord with that
 written license.
  
 The following legend is applicable only to US Government
 contracts under FAR:
  
                    RESTRICTED RIGHTS LEGEND
  
 Use, reproduction and disclosure by the US Government is
 subject to restrictions as set forth in subparagraphs (a)
 and (c) of the Commercial Computer Software - Restricted
 Rights clause in FAR 52.227-19.
  
 Gaussian, Inc.
 340 Quinnipiac St., Bldg. 40, Wallingford CT 06492
  
  
 ---------------------------------------------------------------
 Warning -- This program may not be used in any manner that
 competes with the business of Gaussian, Inc. or will provide
 assistance to any competitor of Gaussian, Inc.  The licensee
 of this program is prohibited from giving any competitor of
 Gaussian, Inc. access to this program.  By using this program,
 the user acknowledges that Gaussian, Inc. is engaged in the
 business of creating and licensing software in the field of
 computational chemistry and represents and warrants to the
 licensee that it is not a competitor of Gaussian, Inc. and that
 it will not use this program in any manner prohibited above.
 ---------------------------------------------------------------
  

 Cite this work as:
 Gaussian 09, Revision D.01,
 M. J. Frisch, G. W. Trucks, H. B. Schlegel, G. E. Scuseria, 
 M. A. Robb, J. R. Cheeseman, G. Scalmani, V. Barone, B. Mennucci, 
 G. A. Petersson, H. Nakatsuji, M. Caricato, X. Li, H. P. Hratchian, 
 A. F. Izmaylov, J. Bloino, G. Zheng, J. L. Sonnenberg, M. Hada, 
 M. Ehara, K. Toyota, R. Fukuda, J. Hasegawa, M. Ishida, T. Nakajima, 
 Y. Honda, O. Kitao, H. Nakai, T. Vreven, J. A. Montgomery, Jr., 
 J. E. Peralta, F. Ogliaro, M. Bearpark, J. J. Heyd, E. Brothers, 
 K. N. Kudin, V. N. Staroverov, T. Keith, R. Kobayashi, J. Normand, 
 K. Raghavachari, A. Rendell, J. C. Burant, S. S. Iyengar, J. Tomasi, 
 M. Cossi, N. Rega, J. M. Millam, M. Klene, J. E. Knox, J. B. Cross, 
 V. Bakken, C. Adamo, J. Jaramillo, R. Gomperts, R. E. Stratmann, 
 O. Yazyev, A. J. Austin, R. Cammi, C. Pomelli, J. W. Ochterski, 
 R. L. Martin, K. Morokuma, V. G. Zakrzewski, G. A. Voth, 
 P. Salvador, J. J. Dannenberg, S. Dapprich, A. D. Daniels, 
 O. Farkas, J. B. Foresman, J. V. Ortiz, J. Cioslowski, 
 and D. J. Fox, Gaussian, Inc., Wallingford CT, 2013.
 
 ******************************************
 Gaussian 09:  IA32W-G09RevD.01 24-Apr-2013
                13-Jan-2020 
 ******************************************
 %nprocshared=2
 Will use up to    2 processors via shared memory.
 %mem=1GB
 %chk=E:\Gaussian file\2-BrHAQ excited energy.chk
 ----------------------------------------------------------------------
 #p td=(nstates=3,root=1) um062x/gen scrf=(solvent=acetonitrile) guess=
 save geom=connectivity empiricaldispersion=gd3
 ----------------------------------------------------------------------
 1/38=1,57=2/1;
 2/12=2,17=6,18=5,40=1/2;
 3/5=7,11=2,16=1,25=1,30=1,70=2201,72=2,74=-55,116=2,124=31/1,2,8,3;
 4//1;
 5/5=2,38=5,53=2/2;
 8/6=1,10=1,107=1,108=3/1;
 9/8=1,41=3,42=1,70=2/14;
 6/7=2,8=2,9=2,10=2/1;
 99/5=1,9=1/99;
 Leave Link    1 at Mon Jan 13 15:31:26 2020, MaxMem=   134217728 cpu:         0.0
 (Enter E:\Gaussian\G09W\l101.exe)
 ----------------------
 2-BrHAQ excited energy
 ----------------------
 Symbolic Z-matrix:
 Charge =  0 Multiplicity = 2
 C                    -5.08378   0.04951  -0.00001 
 C                    -4.04401   0.99854   0.00001 
 C                    -2.71152   0.59136   0.00002 
 C                    -2.42451  -0.80411   0.00002 
 C                    -3.4686   -1.73512  0. 
 C                    -4.80925  -1.30581  -0.00002 
 H                    -6.11325   0.39128  -0.00002 
 H                    -4.25915   2.05867   0.00001 
 H                    -3.28438  -2.80449  -0.00001 
 H                    -5.60807  -2.03668  -0.00003 
 C                    -1.04058  -1.20417   0.00003 
 C                    -1.63095   1.58858   0.00004 
 C                     0.055    -0.26576   0.00002 
 C                    -0.24538   1.12266   0.00002 
 C                     1.37483  -0.71951   0.00001 
 C                     0.8172    2.03129   0. 
 C                     2.41992   0.22843  -0.00001 
 H                     1.58985  -1.77804   0.00001 
 C                     2.15026   1.58126  -0.00001 
 H                     0.59906   3.09043   0.00001 
 H                     2.95994   2.30111  -0.00002 
 Br                    4.23041  -0.39617  -0.00003 
 O                    -1.89695   2.81478  -0.00002 
 O                    -0.68576  -2.46763   0.00005 
 H                    -1.43841  -3.0768    0.00005 
 
 NAtoms=     25 NQM=       25 NQMF=       0 NMMI=      0 NMMIF=      0
                NMic=       0 NMicF=      0.
                    Isotopes and Nuclear Properties:
 (Nuclear quadrupole moments (NQMom) in fm**2, nuclear magnetic moments (NMagM)
  in nuclear magnetons)

  Atom         1           2           3           4           5           6           7           8           9          10
 IAtWgt=          12          12          12          12          12          12           1           1           1           1
 AtmWgt=  12.0000000  12.0000000  12.0000000  12.0000000  12.0000000  12.0000000   1.0078250   1.0078250   1.0078250   1.0078250
 NucSpn=           0           0           0           0           0           0           1           1           1           1
 AtZEff=   0.0000000   0.0000000   0.0000000   0.0000000   0.0000000   0.0000000   0.0000000   0.0000000   0.0000000   0.0000000
 NQMom=    0.0000000   0.0000000   0.0000000   0.0000000   0.0000000   0.0000000   0.0000000   0.0000000   0.0000000   0.0000000
 NMagM=    0.0000000   0.0000000   0.0000000   0.0000000   0.0000000   0.0000000   2.7928460   2.7928460   2.7928460   2.7928460
 AtZNuc=   6.0000000   6.0000000   6.0000000   6.0000000   6.0000000   6.0000000   1.0000000   1.0000000   1.0000000   1.0000000

  Atom        11          12          13          14          15          16          17          18          19          20
 IAtWgt=          12          12          12          12          12          12          12           1          12           1
 AtmWgt=  12.0000000  12.0000000  12.0000000  12.0000000  12.0000000  12.0000000  12.0000000   1.0078250  12.0000000   1.0078250
 NucSpn=           0           0           0           0           0           0           0           1           0           1
 AtZEff=   0.0000000   0.0000000   0.0000000   0.0000000   0.0000000   0.0000000   0.0000000   0.0000000   0.0000000   0.0000000
 NQMom=    0.0000000   0.0000000   0.0000000   0.0000000   0.0000000   0.0000000   0.0000000   0.0000000   0.0000000   0.0000000
 NMagM=    0.0000000   0.0000000   0.0000000   0.0000000   0.0000000   0.0000000   0.0000000   2.7928460   0.0000000   2.7928460
 AtZNuc=   6.0000000   6.0000000   6.0000000   6.0000000   6.0000000   6.0000000   6.0000000   1.0000000   6.0000000   1.0000000

  Atom        21          22          23          24          25
 IAtWgt=           1          79          16          16           1
 AtmWgt=   1.0078250  78.9183361  15.9949146  15.9949146   1.0078250
 NucSpn=           1           3           0           0           1
 AtZEff=   0.0000000   0.0000000   0.0000000   0.0000000   0.0000000
 NQMom=    0.0000000  31.3000000   0.0000000   0.0000000   0.0000000
 NMagM=    2.7928460   2.1063990   0.0000000   0.0000000   2.7928460
 AtZNuc=   1.0000000  35.0000000   8.0000000   8.0000000   1.0000000
 Leave Link  101 at Mon Jan 13 15:31:27 2020, MaxMem=   134217728 cpu:         0.0
 (Enter E:\Gaussian\G09W\l202.exe)
                          Input orientation:                          
 ---------------------------------------------------------------------
 Center     Atomic      Atomic             Coordinates (Angstroms)
 Number     Number       Type             X           Y           Z
 ---------------------------------------------------------------------
      1          6           0       -5.083784    0.049514   -0.000013
      2          6           0       -4.044009    0.998542    0.000005
      3          6           0       -2.711517    0.591359    0.000020
      4          6           0       -2.424512   -0.804109    0.000016
      5          6           0       -3.468595   -1.735115   -0.000002
      6          6           0       -4.809248   -1.305805   -0.000018
      7          1           0       -6.113248    0.391279   -0.000024
      8          1           0       -4.259153    2.058665    0.000010
      9          1           0       -3.284381   -2.804494   -0.000010
     10          1           0       -5.608066   -2.036676   -0.000032
     11          6           0       -1.040580   -1.204166    0.000033
     12          6           0       -1.630945    1.588577    0.000041
     13          6           0        0.054999   -0.265755    0.000019
     14          6           0       -0.245379    1.122655    0.000019
     15          6           0        1.374829   -0.719508    0.000008
     16          6           0        0.817198    2.031294    0.000004
     17          6           0        2.419922    0.228430   -0.000009
     18          1           0        1.589853   -1.778041    0.000011
     19          6           0        2.150259    1.581263   -0.000011
     20          1           0        0.599063    3.090429    0.000007
     21          1           0        2.959944    2.301106   -0.000022
     22         35           0        4.230407   -0.396165   -0.000026
     23          8           0       -1.896947    2.814782   -0.000015
     24          8           0       -0.685760   -2.467628    0.000045
     25          1           0       -1.438414   -3.076797    0.000054
 ---------------------------------------------------------------------
                    Distance matrix (angstroms):
                    1          2          3          4          5
     1  C    0.000000
     2  C    1.407759   0.000000
     3  C    2.433361   1.393317   0.000000
     4  C    2.792920   2.423287   1.424676   0.000000
     5  C    2.407018   2.793561   2.446558   1.398886   0.000000
     6  C    1.382845   2.428087   2.828375   2.436938   1.407714
     7  H    1.084712   2.156506   3.407610   3.877593   3.393485
     8  H    2.171797   1.081734   2.132643   3.400203   3.875274
     9  H    3.373902   3.878159   3.443834   2.177364   1.085130
    10  H    2.151060   3.414502   3.911082   3.413830   2.160619
    11  C    4.233109   3.724582   2.452741   1.440595   2.485390
    12  C    3.780319   2.484154   1.470401   2.520852   3.797879
    13  C    5.148445   4.289559   2.896248   2.537282   3.817687
    14  C    4.955986   3.800657   2.522719   2.908787   4.307664
    15  C    6.504235   5.684672   4.291456   3.800283   4.948759
    16  C    6.224873   4.969699   3.811200   4.306761   5.705599
    17  C    7.505839   6.509645   5.144257   4.953249   6.207265
    18  H    6.919349   6.280909   4.910788   4.130820   5.058630
    19  C    7.394433   6.221617   4.961530   5.159315   6.524560
    20  H    6.445302   5.092554   4.147926   4.930460   6.311237
    21  H    8.352917   7.124046   5.923572   6.215684   7.590599
    22  Br   9.324848   8.391136   7.011812   6.667411   7.814565
    23  O    4.219317   2.812224   2.367939   3.657143   4.813693
    24  O    5.067408   4.826196   3.668936   2.406357   2.877629
    25  H    4.802348   4.837098   3.882803   2.477398   2.433464
                    6          7          8          9         10
     6  C    0.000000
     7  H    2.140213   0.000000
     8  H    3.409144   2.493561   0.000000
     9  H    2.138057   4.267957   4.959889   0.000000
    10  H    1.082720   2.479955   4.311773   2.447255   0.000000
    11  C    3.770038   5.317650   4.583152   2.756028   4.642736
    12  C    4.298727   4.639457   2.669918   4.693924   5.381445
    13  C    4.974194   6.203142   4.900493   4.194837   5.933504
    14  C    5.169750   5.913273   4.121468   4.965685   6.224129
    15  C    6.211808   7.570016   6.281719   5.104449   7.106036
    16  C    6.541645   7.121849   5.076425   6.340962   7.604761
    17  C    7.390181   8.534724   6.925302   6.460472   8.341421
    18  H    6.416502   8.002732   6.995083   4.981141   7.202564
    19  C    7.534580   8.348749   6.427167   6.983565   8.560437
    20  H    6.969699   7.234676   4.966568   7.059126   8.050817
    21  H    8.565638   9.272014   7.223167   8.065900   9.603497
    22  Br   9.085307  10.373585   8.837354   7.891267   9.974308
    23  O    5.045863   4.863184   2.480268   5.788025   6.108113
    24  O    4.284039   6.134409   5.766842   2.620364   4.941135
    25  H    3.807747   5.820792   5.859141   1.865943   4.297424
                   11         12         13         14         15
    11  C    0.000000
    12  C    2.854460   0.000000
    13  C    1.442535   2.506183   0.000000
    14  C    2.458951   1.461806   1.420531   0.000000
    15  C    2.463553   3.789714   1.395651   2.453291   0.000000
    16  C    3.730890   2.487851   2.420203   1.398104   2.806753
    17  C    3.745318   4.273116   2.416005   2.811311   1.410959
    18  H    2.692306   4.659148   2.154712   3.432508   1.080152
    19  C    4.235572   3.781211   2.793133   2.439140   2.427929
    20  H    4.596953   2.688586   3.399997   2.141312   3.888114
    21  H    5.318940   4.645854   3.876529   3.415090   3.411261
    22  Br   5.332558   6.188267   4.177444   4.726465   2.873826
    23  O    4.109174   1.254725   3.646889   2.364523   4.816194
    24  O    1.312339   4.164874   2.323138   3.617191   2.702212
    25  H    1.914424   4.669345   3.183118   4.365630   3.670306
                   16         17         18         19         20
    16  C    0.000000
    17  C    2.412269   0.000000
    18  H    3.886905   2.171391   0.000000
    19  C    1.406975   1.379447   3.405727   0.000000
    20  H    1.081365   3.392133   4.968266   2.164207   0.000000
    21  H    2.159666   2.141871   4.303091   1.083404   2.489335
    22  Br   4.188383   1.915196   2.980286   2.870059   5.034183
    23  O    2.824967   5.032353   5.766437   4.231010   2.511184
    24  O    4.743330   4.112662   2.377803   4.943331   5.704627
    25  H    5.583939   5.080481   3.295022   5.880144   6.495074
                   21         22         23         24         25
    21  H    0.000000
    22  Br   2.981501   0.000000
    23  O    4.883979   6.917705   0.000000
    24  O    6.002665   5.334759   5.419486   0.000000
    25  H    6.947474   6.270671   5.909396   0.968285   0.000000
 Stoichiometry    C14H8BrO2(2)
 Framework group  C1[X(C14H8BrO2)]
 Deg. of freedom    69
 Full point group                 C1      NOp   1
 Largest Abelian subgroup         C1      NOp   1
 Largest concise Abelian subgroup C1      NOp   1
                         Standard orientation:                         
 ---------------------------------------------------------------------
 Center     Atomic      Atomic             Coordinates (Angstroms)
 Number     Number       Type             X           Y           Z
 ---------------------------------------------------------------------
      1          6           0       -5.083784    0.049514   -0.000013
      2          6           0       -4.044009    0.998542    0.000005
      3          6           0       -2.711517    0.591359    0.000020
      4          6           0       -2.424512   -0.804109    0.000016
      5          6           0       -3.468595   -1.735115   -0.000002
      6          6           0       -4.809248   -1.305805   -0.000018
      7          1           0       -6.113248    0.391279   -0.000024
      8          1           0       -4.259153    2.058665    0.000010
      9          1           0       -3.284381   -2.804494   -0.000010
     10          1           0       -5.608066   -2.036676   -0.000032
     11          6           0       -1.040580   -1.204166    0.000033
     12          6           0       -1.630945    1.588577    0.000041
     13          6           0        0.054999   -0.265755    0.000019
     14          6           0       -0.245379    1.122655    0.000019
     15          6           0        1.374829   -0.719508    0.000008
     16          6           0        0.817198    2.031294    0.000004
     17          6           0        2.419922    0.228430   -0.000009
     18          1           0        1.589853   -1.778041    0.000011
     19          6           0        2.150259    1.581263   -0.000011
     20          1           0        0.599063    3.090429    0.000007
     21          1           0        2.959944    2.301106   -0.000022
     22         35           0        4.230407   -0.396165   -0.000026
     23          8           0       -1.896947    2.814782   -0.000015
     24          8           0       -0.685760   -2.467628    0.000045
     25          1           0       -1.438414   -3.076797    0.000054
 ---------------------------------------------------------------------
 Rotational constants (GHZ):      0.9894326      0.1761144      0.1495035
 Leave Link  202 at Mon Jan 13 15:31:28 2020, MaxMem=   134217728 cpu:         0.0
 (Enter E:\Gaussian\G09W\l301.exe)
 General basis read from cards:  (5D, 7F)
 Centers:       7      8      9     10     18     20     21     25
 S 3 1.00
     Exponent=  3.4061341000D+01 Coefficients=  6.0251978000D-03
     Exponent=  5.1235746000D+00 Coefficients=  4.5021094000D-02
     Exponent=  1.1646626000D+00 Coefficients=  2.0189726000D-01
 S 1 1.00
     Exponent=  3.2723041000D-01 Coefficients=  1.0000000000D+00
 S 1 1.00
     Exponent=  1.0307241000D-01 Coefficients=  1.0000000000D+00
 P 1 1.00
     Exponent=  8.0000000000D-01 Coefficients=  1.0000000000D+00
 ****
 Centers:       1      2      3      4      5      6     11     12     13     14
 Centers:      15     16     17     19
 S 6 1.00
     Exponent=  1.3575349682D+04 Coefficients=  2.2245814352D-04
     Exponent=  2.0352333680D+03 Coefficients=  1.7232738252D-03
     Exponent=  4.6322562359D+02 Coefficients=  8.9255715314D-03
     Exponent=  1.3120019598D+02 Coefficients=  3.5727984502D-02
     Exponent=  4.2853015891D+01 Coefficients=  1.1076259931D-01
     Exponent=  1.5584185766D+01 Coefficients=  2.4295627626D-01
 S 2 1.00
     Exponent=  6.2067138508D+00 Coefficients=  4.1440263448D-01
     Exponent=  2.5764896527D+00 Coefficients=  2.3744968655D-01
 S 1 1.00
     Exponent=  5.7696339419D-01 Coefficients=  1.0000000000D+00
 S 1 1.00
     Exponent=  2.2972831358D-01 Coefficients=  1.0000000000D+00
 S 1 1.00
     Exponent=  9.5164440028D-02 Coefficients=  1.0000000000D+00
 P 4 1.00
     Exponent=  3.4697232244D+01 Coefficients=  5.3333657805D-03
     Exponent=  7.9582622826D+00 Coefficients=  3.5864109092D-02
     Exponent=  2.3780826883D+00 Coefficients=  1.4215873329D-01
     Exponent=  8.1433208183D-01 Coefficients=  3.4270471845D-01
 P 1 1.00
     Exponent=  2.8887547253D-01 Coefficients=  4.6445822433D-01
 P 1 1.00
     Exponent=  1.0056823671D-01 Coefficients=  2.4955789874D-01
 D 1 1.00
     Exponent=  1.0970000000D+00 Coefficients=  1.0000000000D+00
 D 1 1.00
     Exponent=  3.1800000000D-01 Coefficients=  1.0000000000D+00
 F 1 1.00
     Exponent=  7.6100000000D-01 Coefficients=  1.0000000000D+00
 ****
 Centers:      23     24
 S 6 1.00
     Exponent=  2.7032382631D+04 Coefficients=  2.1726302465D-04
     Exponent=  4.0523871392D+03 Coefficients=  1.6838662199D-03
     Exponent=  9.2232722710D+02 Coefficients=  8.7395616265D-03
     Exponent=  2.6124070989D+02 Coefficients=  3.5239968808D-02
     Exponent=  8.5354641351D+01 Coefficients=  1.1153519115D-01
     Exponent=  3.1035035245D+01 Coefficients=  2.5588953961D-01
 S 2 1.00
     Exponent=  1.2260860728D+01 Coefficients=  3.9768730901D-01
     Exponent=  4.9987076005D+00 Coefficients=  2.4627849430D-01
 S 1 1.00
     Exponent=  1.1703108158D+00 Coefficients=  1.0000000000D+00
 S 1 1.00
     Exponent=  4.6474740994D-01 Coefficients=  1.0000000000D+00
 S 1 1.00
     Exponent=  1.8504536357D-01 Coefficients=  1.0000000000D+00
 P 4 1.00
     Exponent=  6.3274954801D+01 Coefficients=  6.0685103418D-03
     Exponent=  1.4627049379D+01 Coefficients=  4.1912575824D-02
     Exponent=  4.4501223456D+00 Coefficients=  1.6153841088D-01
     Exponent=  1.5275799647D+00 Coefficients=  3.5706951311D-01
 P 1 1.00
     Exponent=  5.2935117943D-01 Coefficients=  4.4794207502D-01
 P 1 1.00
     Exponent=  1.7478421270D-01 Coefficients=  2.4446069663D-01
 D 1 1.00
     Exponent=  2.3140000000D+00 Coefficients=  1.0000000000D+00
 D 1 1.00
     Exponent=  6.4500000000D-01 Coefficients=  1.0000000000D+00
 F 1 1.00
     Exponent=  1.4280000000D+00 Coefficients=  1.0000000000D+00
 ****
 Centers:      22
 S 8 1.00
     Exponent=  5.6507325256D+05 Coefficients=  2.3660314690D-04
     Exponent=  8.4701723179D+04 Coefficients=  1.8348332508D-03
     Exponent=  1.9276271900D+04 Coefficients=  9.5465849860D-03
     Exponent=  5.4564284576D+03 Coefficients=  3.8877142153D-02
     Exponent=  1.7769503500D+03 Coefficients=  1.2718314231D-01
     Exponent=  6.3919398276D+02 Coefficients=  3.0437662191D-01
     Exponent=  2.4878823961D+02 Coefficients=  4.4490940497D-01
     Exponent=  9.8678305494D+01 Coefficients=  2.4381643058D-01
 S 4 1.00
     Exponent=  6.0607824568D+02 Coefficients= -2.6527158709D-02
     Exponent=  1.8845598484D+02 Coefficients= -1.2484584809D-01
     Exponent=  3.1497144506D+01 Coefficients=  5.6468683559D-01
     Exponent=  1.3736008320D+01 Coefficients=  5.5555268564D-01
 S 2 1.00
     Exponent=  2.1203212766D+01 Coefficients= -2.4940920493D-01
     Exponent=  3.7616420178D+00 Coefficients=  7.1213119743D-01
 S 1 1.00
     Exponent=  1.7735933962D+00 Coefficients=  1.0000000000D+00
 S 1 1.00
     Exponent=  4.5197413664D-01 Coefficients=  1.0000000000D+00
 S 1 1.00
     Exponent=  1.6613377099D-01 Coefficients=  1.0000000000D+00
 P 6 1.00
     Exponent=  3.0196955723D+03 Coefficients=  2.4971049798D-03
     Exponent=  7.1535481126D+02 Coefficients=  2.0419267596D-02
     Exponent=  2.2998328751D+02 Coefficients=  9.6897148309D-02
     Exponent=  8.6167844615D+01 Coefficients=  2.8053901252D-01
     Exponent=  3.4667870802D+01 Coefficients=  4.4606390473D-01
     Exponent=  1.4113870307D+01 Coefficients=  2.4410073923D-01
 P 4 1.00
     Exponent=  5.7085653082D+01 Coefficients= -2.1855950710D-02
     Exponent=  8.8193845840D+00 Coefficients=  3.2707075320D-01
     Exponent=  3.9340302872D+00 Coefficients=  5.7855229520D-01
     Exponent=  1.7998830384D+00 Coefficients=  3.3570987698D-01
 P 1 1.00
     Exponent=  6.6899410512D-01 Coefficients=  1.0000000000D+00
 P 1 1.00
     Exponent=  2.7136238231D-01 Coefficients=  1.0000000000D+00
 P 1 1.00
     Exponent=  1.0083790243D-01 Coefficients=  1.0000000000D+00
 D 5 1.00
     Exponent=  1.6885370257D+02 Coefficients=  8.9663981988D-03
     Exponent=  4.9977949919D+01 Coefficients=  6.2062059316D-02
     Exponent=  1.8274913338D+01 Coefficients=  2.1474732384D-01
     Exponent=  7.2455694631D+00 Coefficients=  4.0335336746D-01
     Exponent=  2.8562315025D+00 Coefficients=  4.2208813080D-01
 D 1 1.00
     Exponent=  1.0459621144D+00 Coefficients=  1.7874813267D-01
 D 1 1.00
     Exponent=  5.6865655000D-01 Coefficients=  1.0000000000D+00
 D 1 1.00
     Exponent=  2.2031490000D-01 Coefficients=  1.0000000000D+00
 F 1 1.00
     Exponent=  5.7083312000D-01 Coefficients=  1.0000000000D+00
 ****
 Ernie: Thresh=  0.10000D-02 Tol=  0.10000D-05 Strict=F.
 There are   679 symmetry adapted cartesian basis functions of A   symmetry.
 There are   592 symmetry adapted basis functions of A   symmetry.
   592 basis functions,   994 primitive gaussians,   679 cartesian basis functions
    72 alpha electrons       71 beta electrons
       nuclear repulsion energy      1391.5400535437 Hartrees.
 IExCor= 4336 DFT=T Ex+Corr=M062X ExCW=0 ScaHFX=  0.540000
 ScaDFX=  1.000000  1.000000  1.000000  1.000000 ScalE2=  1.000000  1.000000
 IRadAn=      0 IRanWt=     -1 IRanGd=            0 ICorTp=0 IEmpDi=131
 NAtoms=   25 NActive=   25 NUniq=   25 SFac= 1.00D+00 NAtFMM=   60 NAOKFM=F Big=F
 Integral buffers will be    262144 words long.
 Raffenetti 2 integral format.
 Two-electron integral symmetry is turned on.
 R6Disp:  Grimme-D3 Dispersion energy=       -0.0011969446 Hartrees.
 Nuclear repulsion after empirical dispersion term =     1391.5388565991 Hartrees.
 ------------------------------------------------------------------------------
 Polarizable Continuum Model (PCM)
 =================================
 Model                : PCM (using non-symmetric T matrix).
 Atomic radii         : UFF (Universal Force Field).
 Polarization charges : Total charges.
 Charge compensation  : None.
 Solution method      : On-the-fly selection.
 Cavity type          : Scaled VdW (van der Waals Surface) (Alpha=1.100).
 Cavity algorithm     : GePol (No added spheres)
                        Default sphere list used, NSphG=   25.
                        Lebedev-Laikov grids with approx.  5.0 points / Ang**2.
                        Smoothing algorithm: Karplus/York (Gamma=1.0000).
                        Polarization charges: spherical gaussians, with
                                              point-specific exponents (IZeta= 3).
                        Self-potential: point-specific (ISelfS= 7).
                        Self-field    : sphere-specific E.n sum rule (ISelfD= 2).
 Solvent              : Acetonitrile, Eps=  35.688000 Eps(inf)=   1.806874
 ------------------------------------------------------------------------------
 GePol: Number of generator spheres                  =      25
 GePol: Total number of spheres                      =      25
 GePol: Number of exposed spheres                    =      25 (100.00%)
 GePol: Number of points                             =    2193
 GePol: Average weight of points                     =       0.13
 GePol: Minimum weight of points                     =   0.24D-10
 GePol: Maximum weight of points                     =    0.20577
 GePol: Number of points with low weight             =     137
 GePol: Fraction of low-weight points (<1% of avg)   =       6.25%
 GePol: Cavity surface area                          =    281.134 Ang**2
 GePol: Cavity volume                                =    307.968 Ang**3
 Leave Link  301 at Mon Jan 13 15:31:30 2020, MaxMem=   134217728 cpu:         2.0
 (Enter E:\Gaussian\G09W\l302.exe)
 NPDir=0 NMtPBC=     1 NCelOv=     1 NCel=       1 NClECP=     1 NCelD=      1
         NCelK=      1 NCelE2=     1 NClLst=     1 CellRange=     0.0.
 One-electron integrals computed using PRISM.
 NBasis=   592 RedAO= T EigKep=  5.87D-06  NBF=   592
 NBsUse=   592 1.00D-06 EigRej= -1.00D+00 NBFU=   592
 Precomputing XC quadrature grid using
 IXCGrd= 4 IRadAn=           0 IRanWt=          -1 IRanGd=           0 AccXCQ= 0.00D+00.
 Generated NRdTot=       0 NPtTot=           0 NUsed=           0 NTot=          16
 NSgBfM=   663   663   663   663   663 MxSgAt=    25 MxSgA2=    25.
 Leave Link  302 at Mon Jan 13 15:31:35 2020, MaxMem=   134217728 cpu:         5.0
 (Enter E:\Gaussian\G09W\l308.exe)
 Leave Link  308 at Mon Jan 13 15:31:37 2020, MaxMem=   134217728 cpu:         1.0
 (Enter E:\Gaussian\G09W\l303.exe)
 DipDrv:  MaxL=1.
 Leave Link  303 at Mon Jan 13 15:31:38 2020, MaxMem=   134217728 cpu:         1.0
 (Enter E:\Gaussian\G09W\l401.exe)
 ExpMin= 9.52D-02 ExpMax= 5.65D+05 ExpMxC= 5.46D+03 IAcc=2 IRadAn=         4 AccDes= 0.00D+00
 Harris functional with IExCor= 1009 and IRadAn=       4 diagonalized for initial guess.
 HarFok:  IExCor= 1009 AccDes= 0.00D+00 IRadAn=         4 IDoV= 1 UseB2=F ITyADJ=14
 ICtDFT=  3500011 ScaDFX=  1.000000  1.000000  1.000000  1.000000
 FoFCou: FMM=F IPFlag=           0 FMFlag=      100000 FMFlg1=           0
         NFxFlg=           0 DoJE=T BraDBF=F KetDBF=T FulRan=T
         wScrn=  0.000000 ICntrl=     500 IOpCl=  0 I1Cent=   200000004 NGrid=           0
         NMat0=    1 NMatS0=      1 NMatT0=    0 NMatD0=    1 NMtDS0=    0 NMtDT0=    0
 Petite list used in FoFCou.
 Harris En= -3262.14986688149    
 JPrj=0 DoOrth=F DoCkMO=F.
 Initial guess <Sx>= 0.0000 <Sy>= 0.0000 <Sz>= 0.5000 <S**2>= 0.7500 S= 0.5000
 Leave Link  401 at Mon Jan 13 15:32:22 2020, MaxMem=   134217728 cpu:        43.0
 (Enter E:\Gaussian\G09W\l502.exe)
 UHF open shell SCF:
 Using DIIS extrapolation, IDIIS=  1040.
 Integral symmetry usage will be decided dynamically.
 IVT=     1409803 IEndB=     1409803 NGot=   134217728 MDV=   133286286
 LenX=   133286286 LenY=   132824566
 Requested convergence on RMS density matrix=1.00D-08 within 128 cycles.
 Requested convergence on MAX density matrix=1.00D-06.
 Requested convergence on             energy=1.00D-06.
 No special actions if energy rises.
 Fock matrices will be formed incrementally for  20 cycles.

 Cycle   1  Pass 1  IDiag  1:
 FoFJK:  IHMeth= 1 ICntrl=       0 DoSepK=F KAlg= 0 I1Cent=   0 FoldK=F
 IRaf= 830000000 NMat=   1 IRICut=       1 DoRegI=T DoRafI=F ISym2E= 0.
 FoFCou: FMM=F IPFlag=           0 FMFlag=      100000 FMFlg1=           0
         NFxFlg=           0 DoJE=F BraDBF=F KetDBF=F FulRan=T
         wScrn=  0.000000 ICntrl=       0 IOpCl=  1 I1Cent=           0 NGrid=           0
         NMat0=    1 NMatS0=      1 NMatT0=    0 NMatD0=    1 NMtDS0=    0 NMtDT0=    0
 Symmetry not used in FoFCou.
 Inv3:  Mode=1 IEnd=    14427747.
 Iteration    1 A*A^-1 deviation from unit magnitude is 2.33D-15 for    534.
 Iteration    1 A*A^-1 deviation from orthogonality  is 1.77D-15 for    204     83.
 Iteration    1 A^-1*A deviation from unit magnitude is 2.11D-15 for   1711.
 Iteration    1 A^-1*A deviation from orthogonality  is 2.61D-12 for   1666   1552.
 E= -3262.56064944618    
 DIIS: error= 2.74D-02 at cycle   1 NSaved=   1.
 NSaved= 1 IEnMin= 1 EnMin= -3262.56064944618     IErMin= 1 ErrMin= 2.74D-02
 ErrMax= 2.74D-02  0.00D+00 EMaxC= 1.00D-01 BMatC= 2.68D+00 BMatP= 2.68D+00
 IDIUse=3 WtCom= 7.26D-01 WtEn= 2.74D-01
 Coeff-Com:  0.100D+01
 Coeff-En:   0.100D+01
 Coeff:      0.100D+01
 Gap=     0.178 Goal=   None    Shift=    0.000
 Gap=     0.246 Goal=   None    Shift=    0.000
 GapD=    0.178 DampG=1.000 DampE=0.500 DampFc=0.5000 IDamp=-1.
 Damping current iteration by 5.00D-01
 RMSDP=9.07D-03 MaxDP=7.28D-01              OVMax= 2.38D-01

 Cycle   2  Pass 1  IDiag  1:
 RMSU=  4.53D-03    CP:  1.02D+00
 E= -3262.74475876981     Delta-E=       -0.184109323632 Rises=F Damp=T
 DIIS: error= 7.27D-03 at cycle   2 NSaved=   2.
 NSaved= 2 IEnMin= 2 EnMin= -3262.74475876981     IErMin= 2 ErrMin= 7.27D-03
 ErrMax= 7.27D-03  0.00D+00 EMaxC= 1.00D-01 BMatC= 2.41D-01 BMatP= 2.68D+00
 IDIUse=3 WtCom= 9.27D-01 WtEn= 7.27D-02
 Coeff-Com: -0.137D+00 0.114D+01
 Coeff-En:   0.000D+00 0.100D+01
 Coeff:     -0.127D+00 0.113D+01
 Gap=     0.163 Goal=   None    Shift=    0.000
 Gap=     0.276 Goal=   None    Shift=    0.000
 RMSDP=3.20D-03 MaxDP=2.71D-01 DE=-1.84D-01 OVMax= 1.24D-01

 Cycle   3  Pass 1  IDiag  1:
 RMSU=  1.83D-03    CP:  9.77D-01  4.31D-01
 E= -3262.90723595738     Delta-E=       -0.162477187570 Rises=F Damp=F
 DIIS: error= 7.96D-03 at cycle   3 NSaved=   3.
 NSaved= 3 IEnMin= 3 EnMin= -3262.90723595738     IErMin= 2 ErrMin= 7.27D-03
 ErrMax= 7.96D-03  0.00D+00 EMaxC= 1.00D-01 BMatC= 1.44D-01 BMatP= 2.41D-01
 IDIUse=3 WtCom= 9.20D-01 WtEn= 7.96D-02
 Coeff-Com: -0.141D+00 0.544D+00 0.598D+00
 Coeff-En:   0.000D+00 0.000D+00 0.100D+01
 Coeff:     -0.130D+00 0.500D+00 0.630D+00
 Gap=     0.163 Goal=   None    Shift=    0.000
 Gap=     0.209 Goal=   None    Shift=    0.000
 RMSDP=9.36D-04 MaxDP=9.34D-02 DE=-1.62D-01 OVMax= 6.76D-02

 Cycle   4  Pass 1  IDiag  1:
 RMSU=  4.54D-04    CP:  9.86D-01  6.05D-01  8.88D-01
 E= -3262.93122705139     Delta-E=       -0.023991094016 Rises=F Damp=F
 DIIS: error= 4.10D-03 at cycle   4 NSaved=   4.
 NSaved= 4 IEnMin= 4 EnMin= -3262.93122705139     IErMin= 4 ErrMin= 4.10D-03
 ErrMax= 4.10D-03  0.00D+00 EMaxC= 1.00D-01 BMatC= 2.49D-02 BMatP= 1.44D-01
 IDIUse=3 WtCom= 9.59D-01 WtEn= 4.10D-02
 Coeff-Com: -0.440D-01 0.111D+00 0.337D+00 0.596D+00
 Coeff-En:   0.000D+00 0.000D+00 0.131D+00 0.869D+00
 Coeff:     -0.422D-01 0.106D+00 0.329D+00 0.607D+00
 Gap=     0.162 Goal=   None    Shift=    0.000
 Gap=     0.214 Goal=   None    Shift=    0.000
 RMSDP=4.34D-04 MaxDP=4.18D-02 DE=-2.40D-02 OVMax= 1.65D-02

 Cycle   5  Pass 1  IDiag  1:
 RMSU=  1.15D-04    CP:  9.82D-01  5.23D-01  9.44D-01  6.57D-01
 E= -3262.93630253635     Delta-E=       -0.005075484954 Rises=F Damp=F
 DIIS: error= 6.88D-04 at cycle   5 NSaved=   5.
 NSaved= 5 IEnMin= 5 EnMin= -3262.93630253635     IErMin= 5 ErrMin= 6.88D-04
 ErrMax= 6.88D-04  0.00D+00 EMaxC= 1.00D-01 BMatC= 9.14D-04 BMatP= 2.49D-02
 IDIUse=3 WtCom= 9.93D-01 WtEn= 6.88D-03
 Coeff-Com: -0.806D-02 0.128D-01 0.100D+00 0.259D+00 0.636D+00
 Coeff-En:   0.000D+00 0.000D+00 0.000D+00 0.000D+00 0.100D+01
 Coeff:     -0.801D-02 0.127D-01 0.995D-01 0.257D+00 0.638D+00
 Gap=     0.162 Goal=   None    Shift=    0.000
 Gap=     0.216 Goal=   None    Shift=    0.000
 RMSDP=4.29D-05 MaxDP=2.30D-03 DE=-5.08D-03 OVMax= 7.86D-03

 Cycle   6  Pass 1  IDiag  1:
 RMSU=  4.03D-05    CP:  9.82D-01  5.22D-01  9.44D-01  6.89D-01  1.00D+00
 E= -3262.93660758395     Delta-E=       -0.000305047606 Rises=F Damp=F
 DIIS: error= 3.27D-04 at cycle   6 NSaved=   6.
 NSaved= 6 IEnMin= 6 EnMin= -3262.93660758395     IErMin= 6 ErrMin= 3.27D-04
 ErrMax= 3.27D-04  0.00D+00 EMaxC= 1.00D-01 BMatC= 1.13D-04 BMatP= 9.14D-04
 IDIUse=3 WtCom= 9.97D-01 WtEn= 3.27D-03
 Coeff-Com:  0.468D-02-0.127D-01-0.182D-01-0.163D-01 0.162D+00 0.880D+00
 Coeff-En:   0.000D+00 0.000D+00 0.000D+00 0.000D+00 0.000D+00 0.100D+01
 Coeff:      0.466D-02-0.127D-01-0.181D-01-0.162D-01 0.161D+00 0.881D+00
 Gap=     0.163 Goal=   None    Shift=    0.000
 Gap=     0.216 Goal=   None    Shift=    0.000
 RMSDP=7.09D-05 MaxDP=5.16D-03 DE=-3.05D-04 OVMax= 1.14D-02

 Cycle   7  Pass 1  IDiag  1:
 RMSU=  2.21D-05    CP:  9.81D-01  5.09D-01  9.49D-01  6.87D-01  1.16D+00
                    CP:  1.35D+00
 E= -3262.93672066411     Delta-E=       -0.000113080158 Rises=F Damp=F
 DIIS: error= 2.34D-04 at cycle   7 NSaved=   7.
 NSaved= 7 IEnMin= 7 EnMin= -3262.93672066411     IErMin= 7 ErrMin= 2.34D-04
 ErrMax= 2.34D-04  0.00D+00 EMaxC= 1.00D-01 BMatC= 4.25D-05 BMatP= 1.13D-04
 IDIUse=3 WtCom= 9.98D-01 WtEn= 2.34D-03
 Coeff-Com:  0.318D-02-0.603D-02-0.338D-01-0.983D-01-0.201D+00 0.182D+00
 Coeff-Com:  0.115D+01
 Coeff-En:   0.000D+00 0.000D+00 0.000D+00 0.000D+00 0.000D+00 0.000D+00
 Coeff-En:   0.100D+01
 Coeff:      0.317D-02-0.601D-02-0.337D-01-0.981D-01-0.201D+00 0.182D+00
 Coeff:      0.115D+01
 Gap=     0.164 Goal=   None    Shift=    0.000
 Gap=     0.217 Goal=   None    Shift=    0.000
 RMSDP=5.57D-05 MaxDP=3.48D-03 DE=-1.13D-04 OVMax= 1.04D-02

 Cycle   8  Pass 1  IDiag  1:
 RMSU=  1.08D-05    CP:  9.81D-01  4.99D-01  9.53D-01  6.80D-01  1.32D+00
                    CP:  1.86D+00  1.53D+00
 E= -3262.93678574591     Delta-E=       -0.000065081793 Rises=F Damp=F
 DIIS: error= 1.44D-04 at cycle   8 NSaved=   8.
 NSaved= 8 IEnMin= 8 EnMin= -3262.93678574591     IErMin= 8 ErrMin= 1.44D-04
 ErrMax= 1.44D-04  0.00D+00 EMaxC= 1.00D-01 BMatC= 1.19D-05 BMatP= 4.25D-05
 IDIUse=3 WtCom= 9.99D-01 WtEn= 1.44D-03
 Coeff-Com:  0.268D-03 0.523D-03-0.987D-02-0.415D-01-0.127D+00-0.120D+00
 Coeff-Com:  0.491D+00 0.806D+00
 Coeff-En:   0.000D+00 0.000D+00 0.000D+00 0.000D+00 0.000D+00 0.000D+00
 Coeff-En:   0.000D+00 0.100D+01
 Coeff:      0.268D-03 0.522D-03-0.985D-02-0.415D-01-0.127D+00-0.120D+00
 Coeff:      0.491D+00 0.806D+00
 Gap=     0.165 Goal=   None    Shift=    0.000
 Gap=     0.217 Goal=   None    Shift=    0.000
 RMSDP=2.13D-05 MaxDP=1.51D-03 DE=-6.51D-05 OVMax= 5.39D-03

 Cycle   9  Pass 1  IDiag  1:
 RMSU=  4.78D-06    CP:  9.81D-01  4.95D-01  9.55D-01  6.74D-01  1.38D+00
                    CP:  2.01D+00  1.87D+00  1.38D+00
 E= -3262.93679963398     Delta-E=       -0.000013888073 Rises=F Damp=F
 DIIS: error= 7.66D-05 at cycle   9 NSaved=   9.
 NSaved= 9 IEnMin= 9 EnMin= -3262.93679963398     IErMin= 9 ErrMin= 7.66D-05
 ErrMax= 7.66D-05  0.00D+00 EMaxC= 1.00D-01 BMatC= 2.64D-06 BMatP= 1.19D-05
 IDIUse=1 WtCom= 1.00D+00 WtEn= 0.00D+00
 Coeff-Com: -0.676D-03 0.161D-02 0.652D-02 0.145D-01 0.182D-01-0.801D-01
 Coeff-Com: -0.186D+00 0.261D+00 0.965D+00
 Coeff:     -0.676D-03 0.161D-02 0.652D-02 0.145D-01 0.182D-01-0.801D-01
 Coeff:     -0.186D+00 0.261D+00 0.965D+00
 Gap=     0.165 Goal=   None    Shift=    0.000
 Gap=     0.217 Goal=   None    Shift=    0.000
 RMSDP=8.16D-06 MaxDP=4.54D-04 DE=-1.39D-05 OVMax= 2.78D-03

 Cycle  10  Pass 1  IDiag  1:
 RMSU=  2.53D-06    CP:  9.80D-01  4.94D-01  9.56D-01  6.71D-01  1.39D+00
                    CP:  2.09D+00  2.01D+00  1.70D+00  1.52D+00
 E= -3262.93680340627     Delta-E=       -0.000003772287 Rises=F Damp=F
 DIIS: error= 3.33D-05 at cycle  10 NSaved=  10.
 NSaved=10 IEnMin=10 EnMin= -3262.93680340627     IErMin=10 ErrMin= 3.33D-05
 ErrMax= 3.33D-05  0.00D+00 EMaxC= 1.00D-01 BMatC= 5.92D-07 BMatP= 2.64D-06
 IDIUse=1 WtCom= 1.00D+00 WtEn= 0.00D+00
 Coeff-Com: -0.350D-03 0.614D-03 0.449D-02 0.132D-01 0.269D-01-0.107D-01
 Coeff-Com: -0.156D+00-0.401D-01 0.290D+00 0.871D+00
 Coeff:     -0.350D-03 0.614D-03 0.449D-02 0.132D-01 0.269D-01-0.107D-01
 Coeff:     -0.156D+00-0.401D-01 0.290D+00 0.871D+00
 Gap=     0.165 Goal=   None    Shift=    0.000
 Gap=     0.217 Goal=   None    Shift=    0.000
 RMSDP=4.95D-06 MaxDP=3.55D-04 DE=-3.77D-06 OVMax= 1.13D-03

 Cycle  11  Pass 1  IDiag  1:
 RMSU=  1.26D-06    CP:  9.80D-01  4.94D-01  9.56D-01  6.70D-01  1.40D+00
                    CP:  2.12D+00  2.08D+00  1.84D+00  1.76D+00  1.34D+00
 E= -3262.93680422924     Delta-E=       -0.000000822976 Rises=F Damp=F
 DIIS: error= 2.24D-05 at cycle  11 NSaved=  11.
 NSaved=11 IEnMin=11 EnMin= -3262.93680422924     IErMin=11 ErrMin= 2.24D-05
 ErrMax= 2.24D-05  0.00D+00 EMaxC= 1.00D-01 BMatC= 1.83D-07 BMatP= 5.92D-07
 IDIUse=1 WtCom= 1.00D+00 WtEn= 0.00D+00
 Coeff-Com:  0.132D-03-0.379D-03-0.718D-03-0.534D-03 0.352D-02 0.258D-01
 Coeff-Com:  0.631D-02-0.838D-01-0.227D+00 0.283D+00 0.994D+00
 Coeff:      0.132D-03-0.379D-03-0.718D-03-0.534D-03 0.352D-02 0.258D-01
 Coeff:      0.631D-02-0.838D-01-0.227D+00 0.283D+00 0.994D+00
 Gap=     0.165 Goal=   None    Shift=    0.000
 Gap=     0.217 Goal=   None    Shift=    0.000
 RMSDP=1.77D-06 MaxDP=7.28D-05 DE=-8.23D-07 OVMax= 6.60D-04

 Cycle  12  Pass 1  IDiag  1:
 RMSU=  7.48D-07    CP:  9.80D-01  4.94D-01  9.56D-01  6.70D-01  1.40D+00
                    CP:  2.12D+00  2.10D+00  1.89D+00  1.92D+00  1.72D+00
                    CP:  1.46D+00
 E= -3262.93680449076     Delta-E=       -0.000000261522 Rises=F Damp=F
 DIIS: error= 8.63D-06 at cycle  12 NSaved=  12.
 NSaved=12 IEnMin=12 EnMin= -3262.93680449076     IErMin=12 ErrMin= 8.63D-06
 ErrMax= 8.63D-06  0.00D+00 EMaxC= 1.00D-01 BMatC= 5.46D-08 BMatP= 1.83D-07
 IDIUse=1 WtCom= 1.00D+00 WtEn= 0.00D+00
 Coeff-Com:  0.144D-03-0.309D-03-0.150D-02-0.378D-02-0.543D-02 0.132D-01
 Coeff-Com:  0.393D-01-0.189D-01-0.174D+00-0.129D+00 0.436D+00 0.845D+00
 Coeff:      0.144D-03-0.309D-03-0.150D-02-0.378D-02-0.543D-02 0.132D-01
 Coeff:      0.393D-01-0.189D-01-0.174D+00-0.129D+00 0.436D+00 0.845D+00
 Gap=     0.165 Goal=   None    Shift=    0.000
 Gap=     0.217 Goal=   None    Shift=    0.000
 RMSDP=1.30D-06 MaxDP=7.84D-05 DE=-2.62D-07 OVMax= 2.99D-04

 Cycle  13  Pass 1  IDiag  1:
 RMSU=  3.10D-07    CP:  9.80D-01  4.93D-01  9.56D-01  6.70D-01  1.41D+00
                    CP:  2.13D+00  2.10D+00  1.92D+00  1.97D+00  1.86D+00
                    CP:  1.83D+00  1.26D+00
 E= -3262.93680454934     Delta-E=       -0.000000058581 Rises=F Damp=F
 DIIS: error= 2.41D-06 at cycle  13 NSaved=  13.
 NSaved=13 IEnMin=13 EnMin= -3262.93680454934     IErMin=13 ErrMin= 2.41D-06
 ErrMax= 2.41D-06  0.00D+00 EMaxC= 1.00D-01 BMatC= 7.01D-09 BMatP= 5.46D-08
 IDIUse=1 WtCom= 1.00D+00 WtEn= 0.00D+00
 Coeff-Com:  0.432D-05 0.604D-05-0.214D-03-0.801D-03-0.219D-02-0.165D-02
 Coeff-Com:  0.913D-02 0.136D-01-0.652D-02-0.880D-01-0.641D-01 0.207D+00
 Coeff-Com:  0.934D+00
 Coeff:      0.432D-05 0.604D-05-0.214D-03-0.801D-03-0.219D-02-0.165D-02
 Coeff:      0.913D-02 0.136D-01-0.652D-02-0.880D-01-0.641D-01 0.207D+00
 Coeff:      0.934D+00
 Gap=     0.165 Goal=   None    Shift=    0.000
 Gap=     0.217 Goal=   None    Shift=    0.000
 RMSDP=3.53D-07 MaxDP=1.80D-05 DE=-5.86D-08 OVMax= 9.60D-05

 Cycle  14  Pass 1  IDiag  1:
 RMSU=  1.45D-07    CP:  9.80D-01  4.93D-01  9.56D-01  6.70D-01  1.41D+00
                    CP:  2.14D+00  2.11D+00  1.93D+00  1.98D+00  1.89D+00
                    CP:  1.94D+00  1.48D+00  1.32D+00
 E= -3262.93680455716     Delta-E=       -0.000000007812 Rises=F Damp=F
 DIIS: error= 1.38D-06 at cycle  14 NSaved=  14.
 NSaved=14 IEnMin=14 EnMin= -3262.93680455716     IErMin=14 ErrMin= 1.38D-06
 ErrMax= 1.38D-06  0.00D+00 EMaxC= 1.00D-01 BMatC= 2.38D-09 BMatP= 7.01D-09
 IDIUse=1 WtCom= 1.00D+00 WtEn= 0.00D+00
 Coeff-Com: -0.292D-04 0.683D-04 0.225D-03 0.475D-03 0.129D-03-0.341D-02
 Coeff-Com: -0.451D-02 0.106D-01 0.327D-01-0.125D-01-0.117D+00-0.814D-01
 Coeff-Com:  0.406D+00 0.769D+00
 Coeff:     -0.292D-04 0.683D-04 0.225D-03 0.475D-03 0.129D-03-0.341D-02
 Coeff:     -0.451D-02 0.106D-01 0.327D-01-0.125D-01-0.117D+00-0.814D-01
 Coeff:      0.406D+00 0.769D+00
 Gap=     0.165 Goal=   None    Shift=    0.000
 Gap=     0.217 Goal=   None    Shift=    0.000
 RMSDP=1.27D-07 MaxDP=6.79D-06 DE=-7.81D-09 OVMax= 2.49D-05

 Cycle  15  Pass 1  IDiag  1:
 RMSU=  6.07D-08    CP:  9.80D-01  4.93D-01  9.56D-01  6.70D-01  1.41D+00
                    CP:  2.14D+00  2.11D+00  1.93D+00  1.98D+00  1.89D+00
                    CP:  1.97D+00  1.55D+00  1.52D+00  1.25D+00
 E= -3262.93680455868     Delta-E=       -0.000000001525 Rises=F Damp=F
 DIIS: error= 6.56D-07 at cycle  15 NSaved=  15.
 NSaved=15 IEnMin=15 EnMin= -3262.93680455868     IErMin=15 ErrMin= 6.56D-07
 ErrMax= 6.56D-07  0.00D+00 EMaxC= 1.00D-01 BMatC= 4.53D-10 BMatP= 2.38D-09
 IDIUse=1 WtCom= 1.00D+00 WtEn= 0.00D+00
 Coeff-Com: -0.552D-05 0.985D-05 0.897D-04 0.309D-03 0.573D-03-0.789D-04
 Coeff-Com: -0.377D-02-0.135D-02 0.923D-02 0.229D-01-0.106D-01-0.800D-01
 Coeff-Com: -0.167D+00 0.207D+00 0.102D+01
 Coeff:     -0.552D-05 0.985D-05 0.897D-04 0.309D-03 0.573D-03-0.789D-04
 Coeff:     -0.377D-02-0.135D-02 0.923D-02 0.229D-01-0.106D-01-0.800D-01
 Coeff:     -0.167D+00 0.207D+00 0.102D+01
 Gap=     0.165 Goal=   None    Shift=    0.000
 Gap=     0.217 Goal=   None    Shift=    0.000
 RMSDP=8.35D-08 MaxDP=5.75D-06 DE=-1.53D-09 OVMax= 1.31D-05

 Cycle  16  Pass 1  IDiag  1:
 RMSU=  3.90D-08    CP:  9.80D-01  4.93D-01  9.56D-01  6.70D-01  1.41D+00
                    CP:  2.14D+00  2.11D+00  1.93D+00  1.98D+00  1.90D+00
                    CP:  1.98D+00  1.57D+00  1.62D+00  1.51D+00  1.42D+00
 E= -3262.93680455914     Delta-E=       -0.000000000462 Rises=F Damp=F
 DIIS: error= 2.12D-07 at cycle  16 NSaved=  16.
 NSaved=16 IEnMin=16 EnMin= -3262.93680455914     IErMin=16 ErrMin= 2.12D-07
 ErrMax= 2.12D-07  0.00D+00 EMaxC= 1.00D-01 BMatC= 6.66D-11 BMatP= 4.53D-10
 IDIUse=1 WtCom= 1.00D+00 WtEn= 0.00D+00
 Coeff-Com:  0.317D-05-0.822D-05-0.186D-04-0.186D-04 0.900D-04 0.579D-03
 Coeff-Com:  0.642D-04-0.184D-02-0.385D-02 0.492D-02 0.190D-01 0.407D-02
 Coeff-Com: -0.107D+00-0.930D-01 0.184D+00 0.992D+00
 Coeff:      0.317D-05-0.822D-05-0.186D-04-0.186D-04 0.900D-04 0.579D-03
 Coeff:      0.642D-04-0.184D-02-0.385D-02 0.492D-02 0.190D-01 0.407D-02
 Coeff:     -0.107D+00-0.930D-01 0.184D+00 0.992D+00
 Gap=     0.165 Goal=   None    Shift=    0.000
 Gap=     0.217 Goal=   None    Shift=    0.000
 RMSDP=4.31D-08 MaxDP=3.52D-06 DE=-4.62D-10 OVMax= 5.44D-06

 Cycle  17  Pass 1  IDiag  1:
 RMSU=  1.49D-08    CP:  9.80D-01  4.93D-01  9.56D-01  6.70D-01  1.41D+00
                    CP:  2.14D+00  2.11D+00  1.93D+00  1.98D+00  1.90D+00
                    CP:  1.97D+00  1.58D+00  1.63D+00  1.59D+00  1.67D+00
                    CP:  1.27D+00
 E= -3262.93680455930     Delta-E=       -0.000000000152 Rises=F Damp=F
 DIIS: error= 1.59D-07 at cycle  17 NSaved=  17.
 NSaved=17 IEnMin=17 EnMin= -3262.93680455930     IErMin=17 ErrMin= 1.59D-07
 ErrMax= 1.59D-07  0.00D+00 EMaxC= 1.00D-01 BMatC= 2.04D-11 BMatP= 6.66D-11
 IDIUse=1 WtCom= 1.00D+00 WtEn= 0.00D+00
 Coeff-Com:  0.191D-05-0.427D-05-0.214D-04-0.576D-04-0.625D-04 0.214D-03
 Coeff-Com:  0.649D-03-0.385D-03-0.310D-02-0.219D-02 0.884D-02 0.161D-01
 Coeff-Com: -0.940D-02-0.677D-01-0.130D+00 0.372D+00 0.815D+00
 Coeff:      0.191D-05-0.427D-05-0.214D-04-0.576D-04-0.625D-04 0.214D-03
 Coeff:      0.649D-03-0.385D-03-0.310D-02-0.219D-02 0.884D-02 0.161D-01
 Coeff:     -0.940D-02-0.677D-01-0.130D+00 0.372D+00 0.815D+00
 Gap=     0.165 Goal=   None    Shift=    0.000
 Gap=     0.217 Goal=   None    Shift=    0.000
 RMSDP=1.27D-08 MaxDP=1.14D-06 DE=-1.52D-10 OVMax= 3.00D-06

 Cycle  18  Pass 1  IDiag  1:
 RMSU=  6.33D-09    CP:  9.80D-01  4.93D-01  9.56D-01  6.70D-01  1.41D+00
                    CP:  2.14D+00  2.11D+00  1.93D+00  1.98D+00  1.90D+00
                    CP:  1.97D+00  1.58D+00  1.64D+00  1.61D+00  1.74D+00
                    CP:  1.43D+00  1.30D+00
 E= -3262.93680455928     Delta-E=        0.000000000013 Rises=F Damp=F
 DIIS: error= 7.12D-08 at cycle  18 NSaved=  18.
 NSaved=18 IEnMin=17 EnMin= -3262.93680455930     IErMin=18 ErrMin= 7.12D-08
 ErrMax= 7.12D-08  0.00D+00 EMaxC= 1.00D-01 BMatC= 5.25D-12 BMatP= 2.04D-11
 IDIUse=1 WtCom= 1.00D+00 WtEn= 0.00D+00
 Coeff-Com: -0.333D-06 0.992D-06 0.176D-06-0.540D-05-0.297D-04-0.960D-04
 Coeff-Com:  0.960D-04 0.494D-03 0.356D-03-0.173D-02-0.337D-02 0.244D-02
 Coeff-Com:  0.287D-01 0.127D-01-0.959D-01-0.204D+00 0.224D+00 0.104D+01
 Coeff:     -0.333D-06 0.992D-06 0.176D-06-0.540D-05-0.297D-04-0.960D-04
 Coeff:      0.960D-04 0.494D-03 0.356D-03-0.173D-02-0.337D-02 0.244D-02
 Coeff:      0.287D-01 0.127D-01-0.959D-01-0.204D+00 0.224D+00 0.104D+01
 Gap=     0.165 Goal=   None    Shift=    0.000
 Gap=     0.217 Goal=   None    Shift=    0.000
 RMSDP=1.19D-08 MaxDP=9.42D-07 DE= 1.27D-11 OVMax= 2.70D-06

 Cycle  19  Pass 1  IDiag  1:
 RMSU=  4.11D-09    CP:  9.80D-01  4.93D-01  9.56D-01  6.70D-01  1.41D+00
                    CP:  2.14D+00  2.11D+00  1.93D+00  1.98D+00  1.90D+00
                    CP:  1.97D+00  1.58D+00  1.64D+00  1.62D+00  1.77D+00
                    CP:  1.52D+00  1.60D+00  1.61D+00
 E= -3262.93680455930     Delta-E=       -0.000000000013 Rises=F Damp=F
 DIIS: error= 4.79D-08 at cycle  19 NSaved=  19.
 NSaved=19 IEnMin=17 EnMin= -3262.93680455930     IErMin=19 ErrMin= 4.79D-08
 ErrMax= 4.79D-08  0.00D+00 EMaxC= 1.00D-01 BMatC= 1.29D-12 BMatP= 5.25D-12
 IDIUse=1 WtCom= 1.00D+00 WtEn= 0.00D+00
 Coeff-Com: -0.621D-06 0.143D-05 0.487D-05 0.118D-04 0.447D-05-0.658D-04
 Coeff-Com: -0.149D-03 0.245D-03 0.727D-03 0.824D-04-0.248D-02-0.341D-02
 Coeff-Com:  0.741D-02 0.182D-01 0.106D-01-0.128D+00-0.161D+00 0.206D+00
 Coeff-Com:  0.105D+01
 Coeff:     -0.621D-06 0.143D-05 0.487D-05 0.118D-04 0.447D-05-0.658D-04
 Coeff:     -0.149D-03 0.245D-03 0.727D-03 0.824D-04-0.248D-02-0.341D-02
 Coeff:      0.741D-02 0.182D-01 0.106D-01-0.128D+00-0.161D+00 0.206D+00
 Coeff:      0.105D+01
 Gap=     0.165 Goal=   None    Shift=    0.000
 Gap=     0.217 Goal=   None    Shift=    0.000
 RMSDP=5.92D-09 MaxDP=4.52D-07 DE=-1.27D-11 OVMax= 2.44D-06

 Error on total polarization charges =  0.01744
 SCF Done:  E(UM062X) =  -3262.93680456     A.U. after   19 cycles
            NFock= 19  Conv=0.59D-08     -V/T= 2.0021
 <Sx>= 0.0000 <Sy>= 0.0000 <Sz>= 0.5000 <S**2>= 0.7798 S= 0.5148
 <L.S>= 0.000000000000E+00
 KE= 3.256027687496D+03 PE=-1.053922897523D+04 EE= 2.628725626580D+03
 Annihilation of the first spin contaminant:
 S**2 before annihilation     0.7798,   after     0.7506
 Leave Link  502 at Mon Jan 13 19:52:50 2020, MaxMem=   134217728 cpu:     15628.0
 (Enter E:\Gaussian\G09W\l801.exe)
 DoSCS=F DFT=T ScalE2(SS,OS)=  1.000000  1.000000
 ExpMin= 9.52D-02 ExpMax= 5.65D+05 ExpMxC= 5.46D+03 IAcc=3 IRadAn=         5 AccDes= 0.00D+00
 HarFok:  IExCor=  205 AccDes= 0.00D+00 IRadAn=         5 IDoV=-2 UseB2=F ITyADJ=14
 ICtDFT= 12500011 ScaDFX=  1.000000  1.000000  1.000000  1.000000
 Largest valence mixing into a core orbital is  1.00D-04
 Largest core mixing into a valence orbital is  3.45D-05
 Largest valence mixing into a core orbital is  9.95D-05
 Largest core mixing into a valence orbital is  3.43D-05
 Range of M.O.s used for correlation:    26   592
 NBasis=   592 NAE=    72 NBE=    71 NFC=    25 NFV=     0
 NROrb=    567 NOA=    47 NOB=    46 NVA=   520 NVB=   521

 **** Warning!!: The largest alpha MO coefficient is  0.70823799D+02


 **** Warning!!: The largest beta MO coefficient is  0.68045837D+02

 Leave Link  801 at Mon Jan 13 19:53:03 2020, MaxMem=   134217728 cpu:         3.0
 (Enter E:\Gaussian\G09W\l914.exe)
 UHF ground state
 MDV=   134217728 DFT=T DoStab=F Mixed=T DoRPA=T DoScal=F NonHer=T
 NEqPCM:  Using non-equilibrium solvation (IEInf=1, Eps=  35.6880, EpsInf=   1.8069)
 Inv3:  Mode=1 IEnd=    14427747.
 Iteration    1 A*A^-1 deviation from unit magnitude is 2.55D-15 for    579.
 Iteration    1 A*A^-1 deviation from orthogonality  is 1.37D-15 for    706    124.
 Iteration    1 A^-1*A deviation from unit magnitude is 2.66D-15 for   1097.
 Iteration    1 A^-1*A deviation from orthogonality  is 1.33D-15 for   1604    688.
 Making orbital integer symmetry assigments:
 Orbital symmetries:
 Alpha Orbitals:
       Occupied  (A) (A) (A) (A) (A) (A) (A) (A) (A) (A) (A) (A)
                 (A) (A) (A) (A) (A) (A) (A) (A) (A) (A) (A) (A)
                 (A) (A) (A) (A) (A) (A) (A) (A) (A) (A) (A) (A)
                 (A) (A) (A) (A) (A) (A) (A) (A) (A) (A) (A) (A)
                 (A) (A) (A) (A) (A) (A) (A) (A) (A) (A) (A) (A)
                 (A) (A) (A) (A) (A) (A) (A) (A) (A) (A) (A) (A)
       Virtual   (A) (A) (A) (A) (A) (A) (A) (A) (A) (A) (A) (A)
                 (A) (A) (A) (A) (A) (A) (A) (A) (A) (A) (A) (A)
                 (A) (A) (A) (A) (A) (A) (A) (A) (A) (A) (A) (A)
                 (A) (A) (A) (A) (A) (A) (A) (A) (A) (A) (A) (A)
                 (A) (A) (A) (A) (A) (A) (A) (A) (A) (A) (A) (A)
                 (A) (A) (A) (A) (A) (A) (A) (A) (A) (A) (A) (A)
                 (A) (A) (A) (A) (A) (A) (A) (A) (A) (A) (A) (A)
                 (A) (A) (A) (A) (A) (A) (A) (A) (A) (A) (A) (A)
                 (A) (A) (A) (A) (A) (A) (A) (A) (A) (A) (A) (A)
                 (A) (A) (A) (A) (A) (A) (A) (A) (A) (A) (A) (A)
                 (A) (A) (A) (A) (A) (A) (A) (A) (A) (A) (A) (A)
                 (A) (A) (A) (A) (A) (A) (A) (A) (A) (A) (A) (A)
                 (A) (A) (A) (A) (A) (A) (A) (A) (A) (A) (A) (A)
                 (A) (A) (A) (A) (A) (A) (A) (A) (A) (A) (A) (A)
                 (A) (A) (A) (A) (A) (A) (A) (A) (A) (A) (A) (A)
                 (A) (A) (A) (A) (A) (A) (A) (A) (A) (A) (A) (A)
                 (A) (A) (A) (A) (A) (A) (A) (A) (A) (A) (A) (A)
                 (A) (A) (A) (A) (A) (A) (A) (A) (A) (A) (A) (A)
                 (A) (A) (A) (A) (A) (A) (A) (A) (A) (A) (A) (A)
                 (A) (A) (A) (A) (A) (A) (A) (A) (A) (A) (A) (A)
                 (A) (A) (A) (A) (A) (A) (A) (A) (A) (A) (A) (A)
                 (A) (A) (A) (A) (A) (A) (A) (A) (A) (A) (A) (A)
                 (A) (A) (A) (A) (A) (A) (A) (A) (A) (A) (A) (A)
                 (A) (A) (A) (A) (A) (A) (A) (A) (A) (A) (A) (A)
                 (A) (A) (A) (A) (A) (A) (A) (A) (A) (A) (A) (A)
                 (A) (A) (A) (A) (A) (A) (A) (A) (A) (A) (A) (A)
                 (A) (A) (A) (A) (A) (A) (A) (A) (A) (A) (A) (A)
                 (A) (A) (A) (A) (A) (A) (A) (A) (A) (A) (A) (A)
                 (A) (A) (A) (A) (A) (A) (A) (A) (A) (A) (A) (A)
                 (A) (A) (A) (A) (A) (A) (A) (A) (A) (A) (A) (A)
                 (A) (A) (A) (A) (A) (A) (A) (A) (A) (A) (A) (A)
                 (A) (A) (A) (A) (A) (A) (A) (A) (A) (A) (A) (A)
                 (A) (A) (A) (A) (A) (A) (A) (A) (A) (A) (A) (A)
                 (A) (A) (A) (A) (A) (A) (A) (A) (A) (A) (A) (A)
                 (A) (A) (A) (A) (A) (A) (A) (A) (A) (A) (A) (A)
                 (A) (A) (A) (A) (A) (A) (A) (A) (A) (A) (A) (A)
                 (A) (A) (A) (A) (A) (A) (A) (A) (A) (A) (A) (A)
                 (A) (A) (A) (A) (A) (A) (A) (A) (A) (A) (A) (A)
                 (A) (A) (A) (A) (A) (A) (A) (A) (A) (A) (A) (A)
                 (A) (A) (A) (A) (A) (A) (A) (A) (A) (A) (A) (A)
                 (A) (A) (A) (A) (A) (A) (A) (A) (A) (A) (A) (A)
                 (A) (A) (A) (A) (A) (A) (A) (A) (A) (A) (A) (A)
                 (A) (A) (A) (A) (A) (A) (A) (A) (A) (A) (A) (A)
                 (A) (A) (A) (A)
 Beta  Orbitals:
       Occupied  (A) (A) (A) (A) (A) (A) (A) (A) (A) (A) (A) (A)
                 (A) (A) (A) (A) (A) (A) (A) (A) (A) (A) (A) (A)
                 (A) (A) (A) (A) (A) (A) (A) (A) (A) (A) (A) (A)
                 (A) (A) (A) (A) (A) (A) (A) (A) (A) (A) (A) (A)
                 (A) (A) (A) (A) (A) (A) (A) (A) (A) (A) (A) (A)
                 (A) (A) (A) (A) (A) (A) (A) (A) (A) (A) (A)
       Virtual   (A) (A) (A) (A) (A) (A) (A) (A) (A) (A) (A) (A)
                 (A) (A) (A) (A) (A) (A) (A) (A) (A) (A) (A) (A)
                 (A) (A) (A) (A) (A) (A) (A) (A) (A) (A) (A) (A)
                 (A) (A) (A) (A) (A) (A) (A) (A) (A) (A) (A) (A)
                 (A) (A) (A) (A) (A) (A) (A) (A) (A) (A) (A) (A)
                 (A) (A) (A) (A) (A) (A) (A) (A) (A) (A) (A) (A)
                 (A) (A) (A) (A) (A) (A) (A) (A) (A) (A) (A) (A)
                 (A) (A) (A) (A) (A) (A) (A) (A) (A) (A) (A) (A)
                 (A) (A) (A) (A) (A) (A) (A) (A) (A) (A) (A) (A)
                 (A) (A) (A) (A) (A) (A) (A) (A) (A) (A) (A) (A)
                 (A) (A) (A) (A) (A) (A) (A) (A) (A) (A) (A) (A)
                 (A) (A) (A) (A) (A) (A) (A) (A) (A) (A) (A) (A)
                 (A) (A) (A) (A) (A) (A) (A) (A) (A) (A) (A) (A)
                 (A) (A) (A) (A) (A) (A) (A) (A) (A) (A) (A) (A)
                 (A) (A) (A) (A) (A) (A) (A) (A) (A) (A) (A) (A)
                 (A) (A) (A) (A) (A) (A) (A) (A) (A) (A) (A) (A)
                 (A) (A) (A) (A) (A) (A) (A) (A) (A) (A) (A) (A)
                 (A) (A) (A) (A) (A) (A) (A) (A) (A) (A) (A) (A)
                 (A) (A) (A) (A) (A) (A) (A) (A) (A) (A) (A) (A)
                 (A) (A) (A) (A) (A) (A) (A) (A) (A) (A) (A) (A)
                 (A) (A) (A) (A) (A) (A) (A) (A) (A) (A) (A) (A)
                 (A) (A) (A) (A) (A) (A) (A) (A) (A) (A) (A) (A)
                 (A) (A) (A) (A) (A) (A) (A) (A) (A) (A) (A) (A)
                 (A) (A) (A) (A) (A) (A) (A) (A) (A) (A) (A) (A)
                 (A) (A) (A) (A) (A) (A) (A) (A) (A) (A) (A) (A)
                 (A) (A) (A) (A) (A) (A) (A) (A) (A) (A) (A) (A)
                 (A) (A) (A) (A) (A) (A) (A) (A) (A) (A) (A) (A)
                 (A) (A) (A) (A) (A) (A) (A) (A) (A) (A) (A) (A)
                 (A) (A) (A) (A) (A) (A) (A) (A) (A) (A) (A) (A)
                 (A) (A) (A) (A) (A) (A) (A) (A) (A) (A) (A) (A)
                 (A) (A) (A) (A) (A) (A) (A) (A) (A) (A) (A) (A)
                 (A) (A) (A) (A) (A) (A) (A) (A) (A) (A) (A) (A)
                 (A) (A) (A) (A) (A) (A) (A) (A) (A) (A) (A) (A)
                 (A) (A) (A) (A) (A) (A) (A) (A) (A) (A) (A) (A)
                 (A) (A) (A) (A) (A) (A) (A) (A) (A) (A) (A) (A)
                 (A) (A) (A) (A) (A) (A) (A) (A) (A) (A) (A) (A)
                 (A) (A) (A) (A) (A) (A) (A) (A) (A) (A) (A) (A)
                 (A) (A) (A) (A) (A) (A) (A) (A) (A) (A) (A) (A)
                 (A) (A) (A) (A) (A) (A) (A) (A) (A) (A) (A) (A)
                 (A) (A) (A) (A) (A) (A) (A) (A) (A) (A) (A) (A)
                 (A) (A) (A) (A) (A) (A) (A) (A) (A) (A) (A) (A)
                 (A) (A) (A) (A) (A) (A) (A) (A) (A) (A) (A) (A)
                 (A) (A) (A) (A) (A) (A) (A) (A) (A) (A) (A) (A)
                 (A) (A) (A) (A) (A)
    12 initial guesses have been made.
 Convergence on wavefunction:    0.001000000000000
 Davidson Disk Diagonalization:  ConvIn= 1.00D-03 SkipCon=T Conv= 1.00D-03.
 Max sub-space:   200 roots to seek:    12 dimension of matrix:        48406
 Iteration     1 Dimension    12 NMult     0 NNew     12
 CISAX will form    12 AO SS matrices at one time.
 NMat=    12 NSing=    12 JSym2X= 0.
 FoFJK:  IHMeth= 1 ICntrl=       0 DoSepK=F KAlg= 0 I1Cent=   0 FoldK=F
 IRaf=         0 NMat=  24 IRICut=       1 DoRegI=T DoRafI=F ISym2E= 0.
 New state      3 was old state      7
 Excitation Energies [eV] at current iteration:
 Root      1 :     2.328291955646598
 Root      2 :     3.469655957765456
 Root      3 :     3.616678995959149
 Root      4 :     3.764639237548443
 Root      5 :     4.069412235416473
 Root      6 :     4.152373697034804
 Root      7 :     4.313873402063442
 Root      8 :     4.618665439692612
 Root      9 :     4.963840201954445
 Root     10 :     5.064689948810455
 Root     11 :     5.502639979053659
 Root     12 :     5.830048837457770
 Iteration     2 Dimension    18 NMult    12 NNew      6
 CISAX will form     6 AO SS matrices at one time.
 NMat=     6 NSing=     6 JSym2X= 0.
 Root      1 not converged, maximum delta is    0.063736761221837
 New state      2 was old state      3
 Root      2 not converged, maximum delta is    0.377021698437021
 New state      3 was old state      2
 Root      3 not converged, maximum delta is    0.064320667785717
 Excitation Energies [eV] at current iteration:
 Root      1 :     2.018477284021517   Change is   -0.309814671625080
 Root      2 :     2.723321941978342   Change is   -0.893357053980807
 Root      3 :     3.206486294925905   Change is   -0.263169662839551
 Iteration     3 Dimension    24 NMult    18 NNew      6
 CISAX will form     6 AO SS matrices at one time.
 NMat=     6 NSing=     6 JSym2X= 0.
 Root      1 not converged, maximum delta is    0.035148783126757
 Root      2 not converged, maximum delta is    0.048025277155898
 Root      3 not converged, maximum delta is    0.037690768346508
 Excitation Energies [eV] at current iteration:
 Root      1 :     1.970835114435107   Change is   -0.047642169586411
 Root      2 :     2.649099992831581   Change is   -0.074221949146762
 Root      3 :     3.153848495145378   Change is   -0.052637799780526
 Iteration     4 Dimension    30 NMult    24 NNew      6
 CISAX will form     6 AO SS matrices at one time.
 NMat=     6 NSing=     6 JSym2X= 0.
 Root      1 not converged, maximum delta is    0.019929555436854
 Root      2 not converged, maximum delta is    0.014014736843049
 Root      3 not converged, maximum delta is    0.029511511411741
 Excitation Energies [eV] at current iteration:
 Root      1 :     1.959215310299098   Change is   -0.011619804136009
 Root      2 :     2.643182852555575   Change is   -0.005917140276005
 Root      3 :     3.137479341079072   Change is   -0.016369154066306
 Iteration     5 Dimension    36 NMult    30 NNew      6
 CISAX will form     6 AO SS matrices at one time.
 NMat=     6 NSing=     6 JSym2X= 0.
 Root      1 not converged, maximum delta is    0.006015589617449
 Root      2 not converged, maximum delta is    0.009884536582447
 Root      3 not converged, maximum delta is    0.030753702769983
 Excitation Energies [eV] at current iteration:
 Root      1 :     1.956946825241684   Change is   -0.002268485057414
 Root      2 :     2.642461072754574   Change is   -0.000721779801002
 Root      3 :     3.127083118204793   Change is   -0.010396222874279
 Iteration     6 Dimension    42 NMult    36 NNew      6
 CISAX will form     6 AO SS matrices at one time.
 NMat=     6 NSing=     6 JSym2X= 0.
 Root      1 not converged, maximum delta is    0.002995853935669
 Root      2 not converged, maximum delta is    0.004358731686995
 Root      3 not converged, maximum delta is    0.020025379065411
 Excitation Energies [eV] at current iteration:
 Root      1 :     1.956210836618811   Change is   -0.000735988622873
 Root      2 :     2.642339431912688   Change is   -0.000121640841886
 Root      3 :     3.123328468946569   Change is   -0.003754649258224
 Iteration     7 Dimension    48 NMult    42 NNew      6
 CISAX will form     6 AO SS matrices at one time.
 NMat=     6 NSing=     6 JSym2X= 0.
 Root      1 not converged, maximum delta is    0.001236954329095
 Root      2 has converged.
 Root      3 not converged, maximum delta is    0.008046009668770
 Excitation Energies [eV] at current iteration:
 Root      1 :     1.956093737365064   Change is   -0.000117099253747
 Root      2 :     2.642325399183231   Change is   -0.000014032729457
 Root      3 :     3.122470677123477   Change is   -0.000857791823092
 Iteration     8 Dimension    52 NMult    48 NNew      4
 CISAX will form     4 AO SS matrices at one time.
 NMat=     4 NSing=     4 JSym2X= 0.
 Root      1 has converged.
 Root      2 has converged.
 Root      3 not converged, maximum delta is    0.002918021519927
 Excitation Energies [eV] at current iteration:
 Root      1 :     1.956078154527024   Change is   -0.000015582838040
 Root      2 :     2.642325398490837   Change is   -0.000000000692393
 Root      3 :     3.122312141068918   Change is   -0.000158536054560
 Iteration     9 Dimension    54 NMult    52 NNew      2
 CISAX will form     2 AO SS matrices at one time.
 NMat=     2 NSing=     2 JSym2X= 0.
 Root      1 has converged.
 Root      2 has converged.
 Root      3 not converged, maximum delta is    0.001966763324899
 Excitation Energies [eV] at current iteration:
 Root      1 :     1.956078080239115   Change is   -0.000000074287908
 Root      2 :     2.642325396860236   Change is   -0.000000001630601
 Root      3 :     3.122275988713784   Change is   -0.000036152355133
 Iteration    10 Dimension    56 NMult    54 NNew      2
 CISAX will form     2 AO SS matrices at one time.
 NMat=     2 NSing=     2 JSym2X= 0.
 Root      1 has converged.
 Root      2 has converged.
 Root      3 not converged, maximum delta is    0.001446689414255
 Excitation Energies [eV] at current iteration:
 Root      1 :     1.956078020037546   Change is   -0.000000060201569
 Root      2 :     2.642325395740429   Change is   -0.000000001119807
 Root      3 :     3.122261121321930   Change is   -0.000014867391855
 Iteration    11 Dimension    58 NMult    56 NNew      2
 CISAX will form     2 AO SS matrices at one time.
 NMat=     2 NSing=     2 JSym2X= 0.
 Root      1 has converged.
 Root      2 has converged.
 Root      3 not converged, maximum delta is    0.001243582238674
 Excitation Energies [eV] at current iteration:
 Root      1 :     1.956077966669391   Change is   -0.000000053368155
 Root      2 :     2.642325395530176   Change is   -0.000000000210254
 Root      3 :     3.122252838541115   Change is   -0.000008282780815
 Convergence on energies, max DE= 8.28D-06.
 Convergence on expansion vectors.
 ***********************************************************************
 Excited states from <AA,BB:AA,BB> singles matrix:
 ***********************************************************************
 
 ExtSpn:  IState=     1 X2= 1.013 Y2= 0.013 X2-Y2-1= 2.22D-16
          S2Grnd=  0.780 Ra=  0.013 Rb=  0.009 T=  0.001 S2Ext=  0.022 S2=  0.802
 ExtSpn:  IState=     2 X2= 1.004 Y2= 0.004 X2-Y2-1=-4.44D-16
          S2Grnd=  0.780 Ra=  0.008 Rb=  0.384 T=  0.116 S2Ext=  0.509 S2=  1.289
 ExtSpn:  IState=     3 X2= 1.012 Y2= 0.012 X2-Y2-1= 8.88D-16
          S2Grnd=  0.780 Ra=  0.058 Rb=  0.035 T=  0.067 S2Ext=  0.160 S2=  0.940
 1PDM for each excited state written to RWF  633
 Ground to excited state transition densities written to RWF  633
 Ground to excited state transition electric dipole moments (Au):
       state          X           Y           Z        Dip. S.      Osc.
         1         0.0809     -0.7297      0.0000      0.5390      0.0258
         2         0.0000      0.0000     -0.0011      0.0000      0.0000
         3        -1.1196     -0.1498      0.0000      1.2759      0.0976
 Ground to excited state transition velocity dipole moments (Au):
       state          X           Y           Z        Dip. S.      Osc.
         1        -0.0074      0.0582      0.0000      0.0034      0.0320
         2         0.0000      0.0000      0.0001      0.0000      0.0000
         3         0.1353      0.0178      0.0000      0.0186      0.1082
 Ground to excited state transition magnetic dipole moments (Au):
       state          X           Y           Z
         1         0.0000      0.0000     -0.1485
         2         0.1057     -0.4824      0.0000
         3         0.0000      0.0000     -0.0459
 Ground to excited state transition velocity quadrupole moments (Au):
       state          XX          YY          ZZ          XY          XZ          YZ
         1        -0.0283      0.0663      0.0007     -0.1823      0.0000      0.0000
         2         0.0000      0.0000      0.0000      0.0000      0.0156      0.0031
         3        -0.4310     -0.0378      0.0026     -0.0589      0.0000      0.0000
 <0|del|b> * <b|rxdel|0> + <0|del|b> * <b|delr+rdel|0>
 Rotatory Strengths (R) in cgs (10**-40 erg-esu-cm/Gauss)
       state          XX          YY          ZZ    R(velocity)    E-M Angle
         1        -0.0059      0.0001      0.0007     -0.0017       90.00
         2         0.0001      0.0006      0.0006      0.0004       90.00
         3        -0.0001      0.0005     -0.0007     -0.0001       90.00
 1/2[<0|r|b>*<b|rxdel|0> + (<0|rxdel|b>*<b|r|0>)*]
 Rotatory Strengths (R) in cgs (10**-40 erg-esu-cm/Gauss)
       state          XX          YY          ZZ     R(length)
         1        -0.0006      0.0007     -0.0022     -0.0007
         2         0.0001     -0.0020      0.0000     -0.0006
         3        -0.0014      0.0039     -0.0008      0.0006
  1/2[<0|del|b>*<b|r|0> + (<0|r|b>*<b|del|0>)*] (Au)
       state          X           Y           Z        Dip. S.   Osc.(frdel)
         1        -0.0006     -0.0425      0.0000      0.0431      0.0287
         2         0.0000      0.0000      0.0000      0.0000      0.0000
         3        -0.1515     -0.0027      0.0000      0.1542      0.1028

 Excitation energies and oscillator strengths:
 
 Excited State   1:  2.051-A      1.9561 eV  633.84 nm  f=0.0258  <S**2>=0.802
     72A -> 73A        0.97279
     70B -> 72B        0.11098
     71B -> 72B        0.11786
 This state for optimization and/or second-order correction.
 Total Energy, E(TD-HF/TD-KS) =  -3262.86492001    
 Copying the excited state density for this state as the 1-particle RhoCI density.
 
 Excited State   2:  2.481-A      2.6423 eV  469.22 nm  f=0.0000  <S**2>=1.289
     68B -> 72B        0.83420
     68B -> 73B        0.44149
     68B -> 79B       -0.24190
 
 Excited State   3:  2.181-A      3.1223 eV  397.10 nm  f=0.0976  <S**2>=0.940
     71A -> 73A       -0.13624
     72A -> 74A        0.83750
     69B -> 72B        0.29017
     69B -> 73B       -0.12748
     70B -> 72B       -0.18674
     71B -> 72B        0.29326
 SavETr:  write IOETrn=   770 NScale= 10 NData=  16 NLR=1 NState=    3 LETran=      62.
 Leave Link  914 at Tue Jan 14 06:14:59 2020, MaxMem=   134217728 cpu:     37314.0
 (Enter E:\Gaussian\G09W\l601.exe)
 Copying SCF densities to generalized density rwf, IOpCl= 1 IROHF=0.

 **********************************************************************

            Population analysis using the SCF density.

 **********************************************************************

 Orbital symmetries:
 Alpha Orbitals:
       Occupied  (A) (A) (A) (A) (A) (A) (A) (A) (A) (A) (A) (A)
                 (A) (A) (A) (A) (A) (A) (A) (A) (A) (A) (A) (A)
                 (A) (A) (A) (A) (A) (A) (A) (A) (A) (A) (A) (A)
                 (A) (A) (A) (A) (A) (A) (A) (A) (A) (A) (A) (A)
                 (A) (A) (A) (A) (A) (A) (A) (A) (A) (A) (A) (A)
                 (A) (A) (A) (A) (A) (A) (A) (A) (A) (A) (A) (A)
       Virtual   (A) (A) (A) (A) (A) (A) (A) (A) (A) (A) (A) (A)
                 (A) (A) (A) (A) (A) (A) (A) (A) (A) (A) (A) (A)
                 (A) (A) (A) (A) (A) (A) (A) (A) (A) (A) (A) (A)
                 (A) (A) (A) (A) (A) (A) (A) (A) (A) (A) (A) (A)
                 (A) (A) (A) (A) (A) (A) (A) (A) (A) (A) (A) (A)
                 (A) (A) (A) (A) (A) (A) (A) (A) (A) (A) (A) (A)
                 (A) (A) (A) (A) (A) (A) (A) (A) (A) (A) (A) (A)
                 (A) (A) (A) (A) (A) (A) (A) (A) (A) (A) (A) (A)
                 (A) (A) (A) (A) (A) (A) (A) (A) (A) (A) (A) (A)
                 (A) (A) (A) (A) (A) (A) (A) (A) (A) (A) (A) (A)
                 (A) (A) (A) (A) (A) (A) (A) (A) (A) (A) (A) (A)
                 (A) (A) (A) (A) (A) (A) (A) (A) (A) (A) (A) (A)
                 (A) (A) (A) (A) (A) (A) (A) (A) (A) (A) (A) (A)
                 (A) (A) (A) (A) (A) (A) (A) (A) (A) (A) (A) (A)
                 (A) (A) (A) (A) (A) (A) (A) (A) (A) (A) (A) (A)
                 (A) (A) (A) (A) (A) (A) (A) (A) (A) (A) (A) (A)
                 (A) (A) (A) (A) (A) (A) (A) (A) (A) (A) (A) (A)
                 (A) (A) (A) (A) (A) (A) (A) (A) (A) (A) (A) (A)
                 (A) (A) (A) (A) (A) (A) (A) (A) (A) (A) (A) (A)
                 (A) (A) (A) (A) (A) (A) (A) (A) (A) (A) (A) (A)
                 (A) (A) (A) (A) (A) (A) (A) (A) (A) (A) (A) (A)
                 (A) (A) (A) (A) (A) (A) (A) (A) (A) (A) (A) (A)
                 (A) (A) (A) (A) (A) (A) (A) (A) (A) (A) (A) (A)
                 (A) (A) (A) (A) (A) (A) (A) (A) (A) (A) (A) (A)
                 (A) (A) (A) (A) (A) (A) (A) (A) (A) (A) (A) (A)
                 (A) (A) (A) (A) (A) (A) (A) (A) (A) (A) (A) (A)
                 (A) (A) (A) (A) (A) (A) (A) (A) (A) (A) (A) (A)
                 (A) (A) (A) (A) (A) (A) (A) (A) (A) (A) (A) (A)
                 (A) (A) (A) (A) (A) (A) (A) (A) (A) (A) (A) (A)
                 (A) (A) (A) (A) (A) (A) (A) (A) (A) (A) (A) (A)
                 (A) (A) (A) (A) (A) (A) (A) (A) (A) (A) (A) (A)
                 (A) (A) (A) (A) (A) (A) (A) (A) (A) (A) (A) (A)
                 (A) (A) (A) (A) (A) (A) (A) (A) (A) (A) (A) (A)
                 (A) (A) (A) (A) (A) (A) (A) (A) (A) (A) (A) (A)
                 (A) (A) (A) (A) (A) (A) (A) (A) (A) (A) (A) (A)
                 (A) (A) (A) (A) (A) (A) (A) (A) (A) (A) (A) (A)
                 (A) (A) (A) (A) (A) (A) (A) (A) (A) (A) (A) (A)
                 (A) (A) (A) (A) (A) (A) (A) (A) (A) (A) (A) (A)
                 (A) (A) (A) (A) (A) (A) (A) (A) (A) (A) (A) (A)
                 (A) (A) (A) (A) (A) (A) (A) (A) (A) (A) (A) (A)
                 (A) (A) (A) (A) (A) (A) (A) (A) (A) (A) (A) (A)
                 (A) (A) (A) (A) (A) (A) (A) (A) (A) (A) (A) (A)
                 (A) (A) (A) (A) (A) (A) (A) (A) (A) (A) (A) (A)
                 (A) (A) (A) (A)
 Beta  Orbitals:
       Occupied  (A) (A) (A) (A) (A) (A) (A) (A) (A) (A) (A) (A)
                 (A) (A) (A) (A) (A) (A) (A) (A) (A) (A) (A) (A)
                 (A) (A) (A) (A) (A) (A) (A) (A) (A) (A) (A) (A)
                 (A) (A) (A) (A) (A) (A) (A) (A) (A) (A) (A) (A)
                 (A) (A) (A) (A) (A) (A) (A) (A) (A) (A) (A) (A)
                 (A) (A) (A) (A) (A) (A) (A) (A) (A) (A) (A)
       Virtual   (A) (A) (A) (A) (A) (A) (A) (A) (A) (A) (A) (A)
                 (A) (A) (A) (A) (A) (A) (A) (A) (A) (A) (A) (A)
                 (A) (A) (A) (A) (A) (A) (A) (A) (A) (A) (A) (A)
                 (A) (A) (A) (A) (A) (A) (A) (A) (A) (A) (A) (A)
                 (A) (A) (A) (A) (A) (A) (A) (A) (A) (A) (A) (A)
                 (A) (A) (A) (A) (A) (A) (A) (A) (A) (A) (A) (A)
                 (A) (A) (A) (A) (A) (A) (A) (A) (A) (A) (A) (A)
                 (A) (A) (A) (A) (A) (A) (A) (A) (A) (A) (A) (A)
                 (A) (A) (A) (A) (A) (A) (A) (A) (A) (A) (A) (A)
                 (A) (A) (A) (A) (A) (A) (A) (A) (A) (A) (A) (A)
                 (A) (A) (A) (A) (A) (A) (A) (A) (A) (A) (A) (A)
                 (A) (A) (A) (A) (A) (A) (A) (A) (A) (A) (A) (A)
                 (A) (A) (A) (A) (A) (A) (A) (A) (A) (A) (A) (A)
                 (A) (A) (A) (A) (A) (A) (A) (A) (A) (A) (A) (A)
                 (A) (A) (A) (A) (A) (A) (A) (A) (A) (A) (A) (A)
                 (A) (A) (A) (A) (A) (A) (A) (A) (A) (A) (A) (A)
                 (A) (A) (A) (A) (A) (A) (A) (A) (A) (A) (A) (A)
                 (A) (A) (A) (A) (A) (A) (A) (A) (A) (A) (A) (A)
                 (A) (A) (A) (A) (A) (A) (A) (A) (A) (A) (A) (A)
                 (A) (A) (A) (A) (A) (A) (A) (A) (A) (A) (A) (A)
                 (A) (A) (A) (A) (A) (A) (A) (A) (A) (A) (A) (A)
                 (A) (A) (A) (A) (A) (A) (A) (A) (A) (A) (A) (A)
                 (A) (A) (A) (A) (A) (A) (A) (A) (A) (A) (A) (A)
                 (A) (A) (A) (A) (A) (A) (A) (A) (A) (A) (A) (A)
                 (A) (A) (A) (A) (A) (A) (A) (A) (A) (A) (A) (A)
                 (A) (A) (A) (A) (A) (A) (A) (A) (A) (A) (A) (A)
                 (A) (A) (A) (A) (A) (A) (A) (A) (A) (A) (A) (A)
                 (A) (A) (A) (A) (A) (A) (A) (A) (A) (A) (A) (A)
                 (A) (A) (A) (A) (A) (A) (A) (A) (A) (A) (A) (A)
                 (A) (A) (A) (A) (A) (A) (A) (A) (A) (A) (A) (A)
                 (A) (A) (A) (A) (A) (A) (A) (A) (A) (A) (A) (A)
                 (A) (A) (A) (A) (A) (A) (A) (A) (A) (A) (A) (A)
                 (A) (A) (A) (A) (A) (A) (A) (A) (A) (A) (A) (A)
                 (A) (A) (A) (A) (A) (A) (A) (A) (A) (A) (A) (A)
                 (A) (A) (A) (A) (A) (A) (A) (A) (A) (A) (A) (A)
                 (A) (A) (A) (A) (A) (A) (A) (A) (A) (A) (A) (A)
                 (A) (A) (A) (A) (A) (A) (A) (A) (A) (A) (A) (A)
                 (A) (A) (A) (A) (A) (A) (A) (A) (A) (A) (A) (A)
                 (A) (A) (A) (A) (A) (A) (A) (A) (A) (A) (A) (A)
                 (A) (A) (A) (A) (A) (A) (A) (A) (A) (A) (A) (A)
                 (A) (A) (A) (A) (A) (A) (A) (A) (A) (A) (A) (A)
                 (A) (A) (A) (A) (A) (A) (A) (A) (A) (A) (A) (A)
                 (A) (A) (A) (A) (A) (A) (A) (A) (A) (A) (A) (A)
                 (A) (A) (A) (A) (A)
 The electronic state is 2-A.
 Alpha  occ. eigenvalues -- -485.38671 -63.37135 -57.19075 -57.18835 -57.18827
 Alpha  occ. eigenvalues --  -19.69173 -19.61399 -10.64201 -10.63345 -10.62055
 Alpha  occ. eigenvalues --  -10.58027 -10.57980 -10.57213 -10.56995 -10.56975
 Alpha  occ. eigenvalues --  -10.56901 -10.56821 -10.56779 -10.56409 -10.56222
 Alpha  occ. eigenvalues --  -10.55868  -9.03774  -6.86185  -6.85301  -6.85271
 Alpha  occ. eigenvalues --   -2.89558  -2.89240  -2.89207  -2.88386  -2.88385
 Alpha  occ. eigenvalues --   -1.23970  -1.15306  -1.00400  -0.98512  -0.93249
 Alpha  occ. eigenvalues --   -0.89571  -0.87701  -0.87194  -0.83997  -0.80267
 Alpha  occ. eigenvalues --   -0.75269  -0.72841  -0.70556  -0.69183  -0.65284
 Alpha  occ. eigenvalues --   -0.64095  -0.60958  -0.56963  -0.55693  -0.55294
 Alpha  occ. eigenvalues --   -0.55178  -0.53857  -0.53256  -0.51841  -0.50874
 Alpha  occ. eigenvalues --   -0.50347  -0.49751  -0.47200  -0.46969  -0.45023
 Alpha  occ. eigenvalues --   -0.44655  -0.43467  -0.42351  -0.41645  -0.39476
 Alpha  occ. eigenvalues --   -0.36269  -0.36232  -0.34303  -0.33445  -0.33291
 Alpha  occ. eigenvalues --   -0.31363  -0.22447
 Alpha virt. eigenvalues --   -0.05969  -0.01301   0.00453   0.02701   0.06215
 Alpha virt. eigenvalues --    0.06255   0.07775   0.09578   0.10349   0.11389
 Alpha virt. eigenvalues --    0.11532   0.12442   0.13645   0.14531   0.14746
 Alpha virt. eigenvalues --    0.16404   0.16604   0.17942   0.18717   0.20253
 Alpha virt. eigenvalues --    0.20657   0.21232   0.21887   0.22317   0.23150
 Alpha virt. eigenvalues --    0.23307   0.24084   0.24275   0.25181   0.25804
 Alpha virt. eigenvalues --    0.25937   0.26304   0.26986   0.27151   0.27335
 Alpha virt. eigenvalues --    0.27349   0.28484   0.28935   0.29613   0.30143
 Alpha virt. eigenvalues --    0.30750   0.31867   0.31945   0.32455   0.33246
 Alpha virt. eigenvalues --    0.33455   0.33906   0.34949   0.35684   0.36172
 Alpha virt. eigenvalues --    0.36544   0.37259   0.38023   0.38653   0.39015
 Alpha virt. eigenvalues --    0.39631   0.39837   0.40375   0.41124   0.41762
 Alpha virt. eigenvalues --    0.43068   0.43368   0.43838   0.43991   0.45841
 Alpha virt. eigenvalues --    0.46511   0.46558   0.47451   0.48168   0.48946
 Alpha virt. eigenvalues --    0.50617   0.50980   0.51125   0.51827   0.52574
 Alpha virt. eigenvalues --    0.52754   0.53448   0.54310   0.54536   0.55811
 Alpha virt. eigenvalues --    0.56510   0.56963   0.58237   0.59035   0.59675
 Alpha virt. eigenvalues --    0.61078   0.61416   0.62946   0.64456   0.64884
 Alpha virt. eigenvalues --    0.65832   0.66152   0.67312   0.67405   0.68338
 Alpha virt. eigenvalues --    0.68384   0.68925   0.69702   0.71428   0.72027
 Alpha virt. eigenvalues --    0.72882   0.73859   0.74085   0.75288   0.75861
 Alpha virt. eigenvalues --    0.76417   0.77068   0.77513   0.77835   0.78084
 Alpha virt. eigenvalues --    0.78315   0.79933   0.80360   0.80649   0.82754
 Alpha virt. eigenvalues --    0.82760   0.84874   0.85850   0.86876   0.87699
 Alpha virt. eigenvalues --    0.87872   0.90138   0.90355   0.90710   0.90771
 Alpha virt. eigenvalues --    0.91781   0.92442   0.93160   0.93772   0.95638
 Alpha virt. eigenvalues --    0.98290   0.98422   0.99069   0.99884   1.00210
 Alpha virt. eigenvalues --    1.01389   1.03353   1.04390   1.05566   1.06836
 Alpha virt. eigenvalues --    1.08142   1.10283   1.10877   1.10947   1.12607
 Alpha virt. eigenvalues --    1.13505   1.14702   1.15173   1.15948   1.19742
 Alpha virt. eigenvalues --    1.20678   1.21516   1.22713   1.22855   1.24154
 Alpha virt. eigenvalues --    1.24250   1.25562   1.26134   1.27399   1.28100
 Alpha virt. eigenvalues --    1.28810   1.28951   1.30121   1.31713   1.33728
 Alpha virt. eigenvalues --    1.34191   1.34864   1.37568   1.38031   1.39656
 Alpha virt. eigenvalues --    1.40256   1.40464   1.41345   1.41856   1.42914
 Alpha virt. eigenvalues --    1.45347   1.46126   1.46497   1.47028   1.47768
 Alpha virt. eigenvalues --    1.49038   1.49526   1.49950   1.51746   1.52777
 Alpha virt. eigenvalues --    1.53492   1.53893   1.55049   1.55538   1.56920
 Alpha virt. eigenvalues --    1.57323   1.58669   1.59148   1.59399   1.60750
 Alpha virt. eigenvalues --    1.62085   1.62991   1.64210   1.64440   1.64926
 Alpha virt. eigenvalues --    1.65311   1.66013   1.67015   1.68697   1.69044
 Alpha virt. eigenvalues --    1.69890   1.71262   1.71818   1.72557   1.73160
 Alpha virt. eigenvalues --    1.74576   1.76065   1.76337   1.76916   1.79069
 Alpha virt. eigenvalues --    1.79888   1.81906   1.82234   1.83334   1.83855
 Alpha virt. eigenvalues --    1.85878   1.87033   1.87208   1.88883   1.89062
 Alpha virt. eigenvalues --    1.90950   1.91892   1.91956   1.94374   1.94850
 Alpha virt. eigenvalues --    1.96106   1.97341   2.00769   2.02433   2.02657
 Alpha virt. eigenvalues --    2.03616   2.04017   2.07860   2.08077   2.12109
 Alpha virt. eigenvalues --    2.12793   2.13588   2.14704   2.16572   2.17508
 Alpha virt. eigenvalues --    2.18088   2.18836   2.19154   2.20696   2.21018
 Alpha virt. eigenvalues --    2.22498   2.23100   2.24986   2.25976   2.28840
 Alpha virt. eigenvalues --    2.30181   2.32345   2.34044   2.35414   2.35471
 Alpha virt. eigenvalues --    2.36339   2.36826   2.37399   2.40872   2.42577
 Alpha virt. eigenvalues --    2.44851   2.46098   2.48671   2.50755   2.51034
 Alpha virt. eigenvalues --    2.51428   2.53517   2.54626   2.58551   2.59023
 Alpha virt. eigenvalues --    2.59323   2.60684   2.61464   2.62531   2.63390
 Alpha virt. eigenvalues --    2.64153   2.64578   2.65670   2.66843   2.67110
 Alpha virt. eigenvalues --    2.68677   2.68717   2.70673   2.71718   2.72513
 Alpha virt. eigenvalues --    2.74868   2.75274   2.76420   2.76791   2.77046
 Alpha virt. eigenvalues --    2.77540   2.78636   2.79784   2.80863   2.81872
 Alpha virt. eigenvalues --    2.82049   2.82939   2.84476   2.85446   2.86735
 Alpha virt. eigenvalues --    2.87440   2.88374   2.88624   2.89154   2.89268
 Alpha virt. eigenvalues --    2.89743   2.90449   2.91457   2.92678   2.94392
 Alpha virt. eigenvalues --    2.94606   2.95670   2.96206   2.96398   2.98113
 Alpha virt. eigenvalues --    2.99176   3.00126   3.01133   3.02693   3.02828
 Alpha virt. eigenvalues --    3.03459   3.05041   3.05186   3.05564   3.07542
 Alpha virt. eigenvalues --    3.09250   3.10307   3.11518   3.12389   3.12437
 Alpha virt. eigenvalues --    3.13215   3.14668   3.15664   3.15985   3.17142
 Alpha virt. eigenvalues --    3.17720   3.18674   3.20229   3.20445   3.20722
 Alpha virt. eigenvalues --    3.21769   3.23676   3.24294   3.25896   3.28267
 Alpha virt. eigenvalues --    3.28667   3.29291   3.30337   3.30456   3.31104
 Alpha virt. eigenvalues --    3.31836   3.32041   3.33348   3.34241   3.34818
 Alpha virt. eigenvalues --    3.37060   3.39630   3.39871   3.40537   3.40826
 Alpha virt. eigenvalues --    3.41768   3.42676   3.43256   3.43935   3.45624
 Alpha virt. eigenvalues --    3.46347   3.46923   3.46959   3.48046   3.48867
 Alpha virt. eigenvalues --    3.49590   3.49969   3.51178   3.51849   3.53259
 Alpha virt. eigenvalues --    3.54866   3.55792   3.56959   3.58018   3.58701
 Alpha virt. eigenvalues --    3.60196   3.61446   3.62866   3.64860   3.66061
 Alpha virt. eigenvalues --    3.66418   3.70421   3.74019   3.75503   3.77303
 Alpha virt. eigenvalues --    3.77989   3.78507   3.80932   3.82130   3.82725
 Alpha virt. eigenvalues --    3.84989   3.85950   3.87243   3.89339   3.92519
 Alpha virt. eigenvalues --    3.95901   3.97162   3.98519   3.99017   3.99155
 Alpha virt. eigenvalues --    4.01724   4.03778   4.04588   4.05383   4.07225
 Alpha virt. eigenvalues --    4.09793   4.09917   4.10398   4.10910   4.11670
 Alpha virt. eigenvalues --    4.14555   4.14719   4.17076   4.17366   4.18360
 Alpha virt. eigenvalues --    4.19621   4.20481   4.21329   4.23296   4.23644
 Alpha virt. eigenvalues --    4.23725   4.26803   4.27643   4.29691   4.29978
 Alpha virt. eigenvalues --    4.33646   4.35909   4.37007   4.37380   4.38802
 Alpha virt. eigenvalues --    4.42598   4.47289   4.49588   4.52773   4.53584
 Alpha virt. eigenvalues --    4.54301   4.56227   4.58343   4.62434   4.63229
 Alpha virt. eigenvalues --    4.66593   4.67967   4.69318   4.72941   4.73502
 Alpha virt. eigenvalues --    4.75044   4.76350   4.77415   4.84493   4.90576
 Alpha virt. eigenvalues --    4.92408   4.94779   4.97143   5.01582   5.03308
 Alpha virt. eigenvalues --    5.05168   5.08461   5.16893   5.17739   5.21620
 Alpha virt. eigenvalues --    5.22506   5.24557   5.26439   5.27504   5.28813
 Alpha virt. eigenvalues --    5.37037   5.40775   5.42440   5.47238   5.50191
 Alpha virt. eigenvalues --    5.55449   5.57012   5.58920   5.67614   5.75415
 Alpha virt. eigenvalues --    5.82798   5.84295   6.02456   6.05105   6.34338
 Alpha virt. eigenvalues --    6.37624   6.38001   6.39876   6.41607   6.65482
 Alpha virt. eigenvalues --    6.71335   6.72236   6.80487   6.83162   7.01149
 Alpha virt. eigenvalues --    7.07593   7.16508   7.35305   7.85350  22.12611
 Alpha virt. eigenvalues --   22.55088  22.66857  22.75010  22.80169  22.87833
 Alpha virt. eigenvalues --   22.91177  22.92940  22.98509  23.07969  23.23800
 Alpha virt. eigenvalues --   23.41067  23.43316  23.98485  44.09615  44.22386
  Beta  occ. eigenvalues -- -485.38672 -63.37136 -57.19074 -57.18838 -57.18827
  Beta  occ. eigenvalues --  -19.68888 -19.61063 -10.63892 -10.63362 -10.62094
  Beta  occ. eigenvalues --  -10.58088 -10.58048 -10.57146 -10.56981 -10.56921
  Beta  occ. eigenvalues --  -10.56862 -10.56753 -10.56719 -10.56446 -10.56257
  Beta  occ. eigenvalues --  -10.55801  -9.03775  -6.86183  -6.85307  -6.85271
  Beta  occ. eigenvalues --   -2.89558  -2.89242  -2.89206  -2.88388  -2.88387
  Beta  occ. eigenvalues --   -1.23031  -1.14448  -1.00146  -0.98386  -0.92978
  Beta  occ. eigenvalues --   -0.89314  -0.87463  -0.87003  -0.83870  -0.79415
  Beta  occ. eigenvalues --   -0.75152  -0.72494  -0.70367  -0.68913  -0.65049
  Beta  occ. eigenvalues --   -0.63848  -0.60633  -0.56597  -0.55571  -0.54828
  Beta  occ. eigenvalues --   -0.53739  -0.53006  -0.52846  -0.51742  -0.50660
  Beta  occ. eigenvalues --   -0.49500  -0.48372  -0.46918  -0.46602  -0.44889
  Beta  occ. eigenvalues --   -0.43484  -0.43399  -0.42197  -0.41437  -0.38599
  Beta  occ. eigenvalues --   -0.36218  -0.34606  -0.33735  -0.32705  -0.32106
  Beta  occ. eigenvalues --   -0.30824
  Beta virt. eigenvalues --   -0.09088  -0.04499  -0.00106   0.00819   0.02678
  Beta virt. eigenvalues --    0.06326   0.08141   0.09074   0.09576   0.10316
  Beta virt. eigenvalues --    0.11286   0.11494   0.12366   0.13560   0.14519
  Beta virt. eigenvalues --    0.14667   0.16251   0.17099   0.17831   0.18674
  Beta virt. eigenvalues --    0.20093   0.20273   0.21506   0.22092   0.22248
  Beta virt. eigenvalues --    0.23029   0.23236   0.24248   0.24332   0.25304
  Beta virt. eigenvalues --    0.25762   0.25943   0.26535   0.26823   0.27196
  Beta virt. eigenvalues --    0.27328   0.27731   0.28531   0.28992   0.29601
  Beta virt. eigenvalues --    0.30073   0.30845   0.31819   0.31966   0.32497
  Beta virt. eigenvalues --    0.33268   0.33415   0.33737   0.34790   0.35614
  Beta virt. eigenvalues --    0.36027   0.36653   0.37233   0.37935   0.38448
  Beta virt. eigenvalues --    0.39421   0.39668   0.40045   0.40217   0.41101
  Beta virt. eigenvalues --    0.41936   0.43145   0.43443   0.43503   0.43924
  Beta virt. eigenvalues --    0.46088   0.46421   0.46546   0.47389   0.48260
  Beta virt. eigenvalues --    0.49063   0.50455   0.50858   0.51088   0.51870
  Beta virt. eigenvalues --    0.52648   0.53060   0.53476   0.54313   0.54470
  Beta virt. eigenvalues --    0.55872   0.56437   0.57267   0.58237   0.59214
  Beta virt. eigenvalues --    0.59788   0.61230   0.61247   0.62811   0.64424
  Beta virt. eigenvalues --    0.64601   0.65879   0.66017   0.67223   0.67523
  Beta virt. eigenvalues --    0.68401   0.68438   0.68930   0.69699   0.71266
  Beta virt. eigenvalues --    0.71974   0.72549   0.73780   0.74325   0.75105
  Beta virt. eigenvalues --    0.75840   0.76724   0.77001   0.77488   0.77806
  Beta virt. eigenvalues --    0.78306   0.78412   0.79783   0.80311   0.81025
  Beta virt. eigenvalues --    0.82672   0.83405   0.84812   0.85896   0.87129
  Beta virt. eigenvalues --    0.87823   0.88081   0.89972   0.90171   0.90607
  Beta virt. eigenvalues --    0.90977   0.91857   0.92638   0.93057   0.93637
  Beta virt. eigenvalues --    0.95634   0.98407   0.98424   0.98927   1.00131
  Beta virt. eigenvalues --    1.00380   1.01432   1.03236   1.04843   1.05551
  Beta virt. eigenvalues --    1.06813   1.08231   1.10405   1.10973   1.11059
  Beta virt. eigenvalues --    1.12677   1.13579   1.14830   1.15261   1.16036
  Beta virt. eigenvalues --    1.19728   1.20748   1.21702   1.22809   1.23047
  Beta virt. eigenvalues --    1.24417   1.24715   1.25557   1.26408   1.27630
  Beta virt. eigenvalues --    1.28190   1.28884   1.29268   1.30210   1.31722
  Beta virt. eigenvalues --    1.33783   1.34411   1.34975   1.37769   1.38314
  Beta virt. eigenvalues --    1.40131   1.40355   1.40638   1.41719   1.41826
  Beta virt. eigenvalues --    1.43793   1.45653   1.46523   1.46564   1.47185
  Beta virt. eigenvalues --    1.47755   1.49453   1.49661   1.50271   1.52543
  Beta virt. eigenvalues --    1.53016   1.54020   1.54104   1.55267   1.56051
  Beta virt. eigenvalues --    1.56937   1.57835   1.58818   1.59431   1.59554
  Beta virt. eigenvalues --    1.60856   1.62693   1.63250   1.64535   1.64609
  Beta virt. eigenvalues --    1.65183   1.65424   1.66484   1.67299   1.68804
  Beta virt. eigenvalues --    1.69874   1.70051   1.71682   1.72222   1.72857
  Beta virt. eigenvalues --    1.73352   1.75052   1.76203   1.76439   1.77109
  Beta virt. eigenvalues --    1.79149   1.80029   1.82036   1.82332   1.83459
  Beta virt. eigenvalues --    1.84234   1.86015   1.87216   1.87389   1.89138
  Beta virt. eigenvalues --    1.89227   1.91344   1.92133   1.92705   1.94627
  Beta virt. eigenvalues --    1.95176   1.96557   1.97573   2.00955   2.02707
  Beta virt. eigenvalues --    2.03025   2.03849   2.04433   2.08122   2.08267
  Beta virt. eigenvalues --    2.12297   2.13267   2.13862   2.14984   2.17009
  Beta virt. eigenvalues --    2.17817   2.18333   2.19077   2.19534   2.21038
  Beta virt. eigenvalues --    2.21492   2.22946   2.23624   2.25176   2.26247
  Beta virt. eigenvalues --    2.29405   2.30487   2.32710   2.34274   2.35731
  Beta virt. eigenvalues --    2.36407   2.36723   2.37087   2.38207   2.41108
  Beta virt. eigenvalues --    2.42806   2.45133   2.46326   2.48871   2.50882
  Beta virt. eigenvalues --    2.51250   2.51623   2.54969   2.55571   2.58938
  Beta virt. eigenvalues --    2.59112   2.59478   2.60869   2.61716   2.63714
  Beta virt. eigenvalues --    2.63716   2.64770   2.65101   2.66582   2.67082
  Beta virt. eigenvalues --    2.67880   2.68957   2.69807   2.71709   2.71901
  Beta virt. eigenvalues --    2.72729   2.75063   2.75924   2.76626   2.77041
  Beta virt. eigenvalues --    2.78090   2.78529   2.78906   2.80145   2.81187
  Beta virt. eigenvalues --    2.82345   2.82410   2.83262   2.84708   2.85838
  Beta virt. eigenvalues --    2.87263   2.88731   2.88843   2.89201   2.89654
  Beta virt. eigenvalues --    2.90031   2.90801   2.90909   2.91766   2.93522
  Beta virt. eigenvalues --    2.95166   2.95326   2.96282   2.96434   2.97082
  Beta virt. eigenvalues --    2.98621   2.99872   3.00293   3.01564   3.03344
  Beta virt. eigenvalues --    3.03435   3.03999   3.05245   3.05907   3.05953
  Beta virt. eigenvalues --    3.07919   3.09813   3.10954   3.11866   3.13042
  Beta virt. eigenvalues --    3.13166   3.14004   3.15047   3.16175   3.16540
  Beta virt. eigenvalues --    3.17965   3.18203   3.19156   3.20685   3.21049
  Beta virt. eigenvalues --    3.21118   3.22422   3.24422   3.25582   3.27029
  Beta virt. eigenvalues --    3.29038   3.29141   3.29624   3.30868   3.31171
  Beta virt. eigenvalues --    3.31585   3.31996   3.32701   3.34110   3.34717
  Beta virt. eigenvalues --    3.35098   3.37766   3.40063   3.40204   3.41037
  Beta virt. eigenvalues --    3.41865   3.42308   3.43209   3.43871   3.44306
  Beta virt. eigenvalues --    3.45945   3.46954   3.47487   3.47921   3.48888
  Beta virt. eigenvalues --    3.49279   3.50441   3.50445   3.51455   3.52445
  Beta virt. eigenvalues --    3.53948   3.55435   3.56160   3.57688   3.58808
  Beta virt. eigenvalues --    3.59248   3.60442   3.62112   3.63044   3.65824
  Beta virt. eigenvalues --    3.66377   3.67390   3.70600   3.75171   3.76119
  Beta virt. eigenvalues --    3.78004   3.78627   3.78832   3.81269   3.82896
  Beta virt. eigenvalues --    3.83424   3.85622   3.86476   3.87552   3.90316
  Beta virt. eigenvalues --    3.92915   3.96502   3.98026   3.99355   4.00336
  Beta virt. eigenvalues --    4.00957   4.02293   4.04270   4.04951   4.05400
  Beta virt. eigenvalues --    4.07811   4.10040   4.10545   4.11046   4.11582
  Beta virt. eigenvalues --    4.11968   4.14835   4.15130   4.17521   4.17977
  Beta virt. eigenvalues --    4.18650   4.19935   4.20941   4.22103   4.23829
  Beta virt. eigenvalues --    4.24118   4.24580   4.27214   4.27992   4.30496
  Beta virt. eigenvalues --    4.31645   4.34139   4.36384   4.37478   4.38764
  Beta virt. eigenvalues --    4.39393   4.43266   4.47480   4.50176   4.53241
  Beta virt. eigenvalues --    4.54013   4.55020   4.57081   4.58956   4.63190
  Beta virt. eigenvalues --    4.64031   4.68033   4.68722   4.70023   4.73525
  Beta virt. eigenvalues --    4.74346   4.75644   4.76680   4.78096   4.85105
  Beta virt. eigenvalues --    4.91095   4.93111   4.95449   4.98789   5.02723
  Beta virt. eigenvalues --    5.04127   5.06461   5.09556   5.17422   5.18566
  Beta virt. eigenvalues --    5.22461   5.23257   5.25100   5.27501   5.28791
  Beta virt. eigenvalues --    5.29665   5.37679   5.42160   5.43252   5.47671
  Beta virt. eigenvalues --    5.50780   5.56265   5.57792   5.60600   5.69536
  Beta virt. eigenvalues --    5.76185   5.83429   5.85374   6.03403   6.05835
  Beta virt. eigenvalues --    6.35108   6.38906   6.39352   6.41555   6.42287
  Beta virt. eigenvalues --    6.67464   6.72227   6.73044   6.82407   6.83859
  Beta virt. eigenvalues --    7.01396   7.08551   7.16830   7.35549   7.85351
  Beta virt. eigenvalues --   22.12672  22.55158  22.66953  22.75116  22.80231
  Beta virt. eigenvalues --   22.87862  22.91341  22.93058  22.98597  23.08030
  Beta virt. eigenvalues --   23.24437  23.41409  23.43473  23.98824  44.09585
  Beta virt. eigenvalues --   44.22354
          Condensed to atoms (all electrons):
               1          2          3          4          5          6
     1  C    4.989277   0.400656  -0.017861  -0.037711   0.011802   0.447365
     2  C    0.400656   5.416109   0.218069  -0.152038  -0.168504   0.036450
     3  C   -0.017861   0.218069   5.749431   0.436473  -0.050509  -0.055781
     4  C   -0.037711  -0.152038   0.436473   5.288181   0.358014  -0.068953
     5  C    0.011802  -0.168504  -0.050509   0.358014   5.272813   0.450290
     6  C    0.447365   0.036450  -0.055781  -0.068953   0.450290   4.969900
     7  H    0.422068  -0.039346   0.006643   0.001346   0.007406  -0.039673
     8  H   -0.032128   0.432254  -0.058410   0.006880  -0.003455   0.007245
     9  H    0.001032   0.000495   0.010255  -0.060407   0.411004  -0.007504
    10  H   -0.035803   0.005696   0.000256   0.005484  -0.034132   0.419877
    11  C   -0.005804   0.026038   0.066045   0.319212  -0.114200   0.004662
    12  C    0.017299  -0.132977   0.035919   0.079539   0.023390  -0.004186
    13  C    0.003017  -0.012292  -0.176451  -0.011772   0.055911  -0.001810
    14  C   -0.007153   0.101027  -0.006452  -0.157751  -0.012701   0.003440
    15  C   -0.000039   0.001408  -0.003916   0.030972  -0.007154   0.000007
    16  C    0.000194  -0.012513   0.101762  -0.007224   0.001441  -0.000171
    17  C   -0.000002  -0.000111   0.002655  -0.001311   0.000152  -0.000003
    18  H    0.000004  -0.000023  -0.000215   0.000381  -0.000075  -0.000007
    19  C    0.000001   0.000175  -0.006814   0.001731  -0.000091   0.000001
    20  H    0.000000  -0.000574   0.006102  -0.000148   0.000014  -0.000002
    21  H    0.000000   0.000003  -0.000030  -0.000007   0.000000   0.000000
    22  Br   0.000000   0.000000  -0.000026   0.000087   0.000000   0.000000
    23  O    0.000251   0.062438  -0.260787   0.002300  -0.000280   0.000921
    24  O   -0.000227   0.000132   0.000298  -0.108632   0.009657   0.002591
    25  H   -0.000135   0.000216   0.000534  -0.035097   0.019673   0.001738
               7          8          9         10         11         12
     1  C    0.422068  -0.032128   0.001032  -0.035803  -0.005804   0.017299
     2  C   -0.039346   0.432254   0.000495   0.005696   0.026038  -0.132977
     3  C    0.006643  -0.058410   0.010255   0.000256   0.066045   0.035919
     4  C    0.001346   0.006880  -0.060407   0.005484   0.319212   0.079539
     5  C    0.007406  -0.003455   0.411004  -0.034132  -0.114200   0.023390
     6  C   -0.039673   0.007245  -0.007504   0.419877   0.004662  -0.004186
     7  H    0.477042  -0.003282  -0.000275  -0.004019   0.000133  -0.000639
     8  H   -0.003282   0.465977   0.000038  -0.000119   0.001064  -0.017382
     9  H   -0.000275   0.000038   0.502417  -0.002538  -0.006169   0.001095
    10  H   -0.004019  -0.000119  -0.002538   0.469329  -0.000258   0.000091
    11  C    0.000133   0.001064  -0.006169  -0.000258   5.159837  -0.180534
    12  C   -0.000639  -0.017382   0.001095   0.000091  -0.180534   5.191220
    13  C   -0.000007  -0.000293   0.003319  -0.000024   0.161321   0.102148
    14  C   -0.000044   0.006459  -0.000712   0.000014   0.039517   0.023175
    15  C    0.000000  -0.000001  -0.000050   0.000001  -0.056267   0.012163
    16  C    0.000004  -0.000600  -0.000033   0.000000   0.009061  -0.130346
    17  C    0.000000   0.000000  -0.000003   0.000000  -0.008381  -0.002473
    18  H    0.000000   0.000000  -0.000019   0.000000  -0.015619   0.000587
    19  C    0.000000  -0.000004   0.000003   0.000000   0.007316   0.014545
    20  H    0.000000  -0.000053   0.000000   0.000000   0.000129  -0.014080
    21  H    0.000000   0.000000   0.000000   0.000000   0.000423  -0.000506
    22  Br   0.000000   0.000000   0.000000   0.000000  -0.002613   0.000094
    23  O   -0.000151   0.022023   0.000010   0.000002  -0.010618   0.797037
    24  O   -0.000001   0.000008  -0.002974  -0.000005   0.411229  -0.000913
    25  H   -0.000002   0.000002   0.006557   0.000033  -0.021662  -0.000072
              13         14         15         16         17         18
     1  C    0.003017  -0.007153  -0.000039   0.000194  -0.000002   0.000004
     2  C   -0.012292   0.101027   0.001408  -0.012513  -0.000111  -0.000023
     3  C   -0.176451  -0.006452  -0.003916   0.101762   0.002655  -0.000215
     4  C   -0.011772  -0.157751   0.030972  -0.007224  -0.001311   0.000381
     5  C    0.055911  -0.012701  -0.007154   0.001441   0.000152  -0.000075
     6  C   -0.001810   0.003440   0.000007  -0.000171  -0.000003  -0.000007
     7  H   -0.000007  -0.000044   0.000000   0.000004   0.000000   0.000000
     8  H   -0.000293   0.006459  -0.000001  -0.000600   0.000000   0.000000
     9  H    0.003319  -0.000712  -0.000050  -0.000033  -0.000003  -0.000019
    10  H   -0.000024   0.000014   0.000001   0.000000   0.000000   0.000000
    11  C    0.161321   0.039517  -0.056267   0.009061  -0.008381  -0.015619
    12  C    0.102148   0.023175   0.012163  -0.130346  -0.002473   0.000587
    13  C    5.373897   0.469647   0.253880  -0.125508   0.016765  -0.017427
    14  C    0.469647   5.782704  -0.049634   0.177773  -0.066860   0.010515
    15  C    0.253880  -0.049634   5.521585  -0.179800   0.331242   0.404938
    16  C   -0.125508   0.177773  -0.179800   5.474747   0.085984  -0.002854
    17  C    0.016765  -0.066860   0.331242   0.085984   4.932064  -0.039757
    18  H   -0.017427   0.010515   0.404938  -0.002854  -0.039757   0.448561
    19  C   -0.065600   0.005833   0.045440   0.316323   0.345128   0.009421
    20  H    0.004866  -0.053674  -0.001466   0.424836   0.005033   0.000044
    21  H   -0.000620   0.005890   0.014053  -0.034528  -0.052815   0.000015
    22  Br   0.017908  -0.001391  -0.102571   0.020208   0.380071  -0.004697
    23  O    0.000987  -0.264468   0.000012   0.062553   0.000685   0.000010
    24  O   -0.168278  -0.002856   0.038432  -0.000369  -0.001293   0.010522
    25  H    0.019075   0.000052  -0.002400   0.000010  -0.000043  -0.000285
              19         20         21         22         23         24
     1  C    0.000001   0.000000   0.000000   0.000000   0.000251  -0.000227
     2  C    0.000175  -0.000574   0.000003   0.000000   0.062438   0.000132
     3  C   -0.006814   0.006102  -0.000030  -0.000026  -0.260787   0.000298
     4  C    0.001731  -0.000148  -0.000007   0.000087   0.002300  -0.108632
     5  C   -0.000091   0.000014   0.000000   0.000000  -0.000280   0.009657
     6  C    0.000001  -0.000002   0.000000   0.000000   0.000921   0.002591
     7  H    0.000000   0.000000   0.000000   0.000000  -0.000151  -0.000001
     8  H   -0.000004  -0.000053   0.000000   0.000000   0.022023   0.000008
     9  H    0.000003   0.000000   0.000000   0.000000   0.000010  -0.002974
    10  H    0.000000   0.000000   0.000000   0.000000   0.000002  -0.000005
    11  C    0.007316   0.000129   0.000423  -0.002613  -0.010618   0.411229
    12  C    0.014545  -0.014080  -0.000506   0.000094   0.797037  -0.000913
    13  C   -0.065600   0.004866  -0.000620   0.017908   0.000987  -0.168278
    14  C    0.005833  -0.053674   0.005890  -0.001391  -0.264468  -0.002856
    15  C    0.045440  -0.001466   0.014053  -0.102571   0.000012   0.038432
    16  C    0.316323   0.424836  -0.034528   0.020208   0.062553  -0.000369
    17  C    0.345128   0.005033  -0.052815   0.380071   0.000685  -0.001293
    18  H    0.009421   0.000044   0.000015  -0.004697   0.000010   0.010522
    19  C    5.189904  -0.027742   0.424171  -0.100976   0.001408   0.000428
    20  H   -0.027742   0.460814  -0.002590  -0.000187   0.021301   0.000005
    21  H    0.424171  -0.002590   0.468114  -0.007316  -0.000125   0.000000
    22  Br  -0.100976  -0.000187  -0.007316  34.898363   0.000000  -0.000004
    23  O    0.001408   0.021301  -0.000125   0.000000   8.011952   0.000001
    24  O    0.000428   0.000005   0.000000  -0.000004   0.000001   7.898705
    25  H    0.000011  -0.000001   0.000000  -0.000006  -0.000001   0.312946
              25
     1  C   -0.000135
     2  C    0.000216
     3  C    0.000534
     4  C   -0.035097
     5  C    0.019673
     6  C    0.001738
     7  H   -0.000002
     8  H    0.000002
     9  H    0.006557
    10  H    0.000033
    11  C   -0.021662
    12  C   -0.000072
    13  C    0.019075
    14  C    0.000052
    15  C   -0.002400
    16  C    0.000010
    17  C   -0.000043
    18  H   -0.000285
    19  C    0.000011
    20  H   -0.000001
    21  H    0.000000
    22  Br  -0.000006
    23  O   -0.000001
    24  O    0.312946
    25  H    0.336744
          Atomic-Atomic Spin Densities.
               1          2          3          4          5          6
     1  C    0.140380   0.018784  -0.012193   0.003701  -0.009027  -0.014567
     2  C    0.018784  -0.065372  -0.012504   0.005800  -0.000029  -0.001100
     3  C   -0.012193  -0.012504   0.159255  -0.025926   0.014531   0.005412
     4  C    0.003701   0.005800  -0.025926  -0.101808  -0.033750  -0.000760
     5  C   -0.009027  -0.000029   0.014531  -0.033750   0.155651   0.016482
     6  C   -0.014567  -0.001100   0.005412  -0.000760   0.016482  -0.077000
     7  H   -0.000084   0.000704  -0.000113   0.000006   0.000106  -0.000555
     8  H   -0.000237   0.000782  -0.000132   0.000017   0.000087  -0.000128
     9  H    0.000202  -0.000018   0.000274  -0.001611   0.001073   0.000208
    10  H   -0.000864  -0.000068  -0.000084  -0.000152   0.000373  -0.000137
    11  C    0.001002  -0.001711  -0.019458   0.059998  -0.012080  -0.001461
    12  C    0.000110   0.006372   0.028432  -0.005938  -0.002181   0.000018
    13  C    0.000311  -0.000727  -0.006514  -0.001335  -0.001766  -0.000247
    14  C   -0.000556  -0.001328   0.016135  -0.007096   0.000905   0.000211
    15  C   -0.000010  -0.000020  -0.000326   0.000960   0.000118   0.000021
    16  C    0.000004   0.000444  -0.000452  -0.001529  -0.000044  -0.000003
    17  C    0.000000  -0.000004   0.000337  -0.000531   0.000023   0.000000
    18  H    0.000000   0.000002  -0.000016   0.000108   0.000000   0.000001
    19  C    0.000001   0.000004  -0.000716   0.000468  -0.000002   0.000000
    20  H    0.000000   0.000038  -0.000182  -0.000025  -0.000001   0.000000
    21  H    0.000000   0.000000  -0.000002   0.000002   0.000000   0.000000
    22  Br   0.000000   0.000000   0.000000  -0.000001   0.000000   0.000000
    23  O    0.000047   0.001798  -0.008544  -0.000238  -0.000074  -0.000013
    24  O   -0.000049  -0.000016   0.000668   0.000501   0.005059   0.000075
    25  H    0.000013  -0.000019  -0.000111   0.000356   0.000567  -0.000019
               7          8          9         10         11         12
     1  C   -0.000084  -0.000237   0.000202  -0.000864   0.001002   0.000110
     2  C    0.000704   0.000782  -0.000018  -0.000068  -0.001711   0.006372
     3  C   -0.000113  -0.000132   0.000274  -0.000084  -0.019458   0.028432
     4  C    0.000006   0.000017  -0.001611  -0.000152   0.059998  -0.005938
     5  C    0.000106   0.000087   0.001073   0.000373  -0.012080  -0.002181
     6  C   -0.000555  -0.000128   0.000208  -0.000137  -0.001461   0.000018
     7  H   -0.003396  -0.000008   0.000001  -0.000006   0.000001  -0.000004
     8  H   -0.000008   0.001095   0.000000  -0.000001  -0.000069   0.000786
     9  H    0.000001   0.000000  -0.003737  -0.000067   0.000336  -0.000062
    10  H   -0.000006  -0.000001  -0.000067   0.001541   0.000029  -0.000004
    11  C    0.000001  -0.000069   0.000336   0.000029   0.460759   0.019645
    12  C   -0.000004   0.000786  -0.000062  -0.000004   0.019645  -0.075778
    13  C    0.000001  -0.000022  -0.000008   0.000000   0.063325  -0.004798
    14  C   -0.000001  -0.000234   0.000025   0.000001  -0.021556   0.030643
    15  C    0.000000   0.000000  -0.000013   0.000000  -0.013004  -0.001130
    16  C    0.000000   0.000042   0.000001   0.000000  -0.000300   0.004487
    17  C    0.000000   0.000000   0.000001   0.000000  -0.001470   0.000012
    18  H    0.000000   0.000000   0.000000   0.000000   0.000244  -0.000039
    19  C    0.000000   0.000000   0.000000   0.000000   0.000662   0.000171
    20  H    0.000000   0.000004   0.000000   0.000000  -0.000042   0.000768
    21  H    0.000000   0.000000   0.000000   0.000000  -0.000001  -0.000004
    22  Br   0.000000   0.000000   0.000000   0.000000   0.000055  -0.000003
    23  O    0.000003  -0.001098   0.000000   0.000000   0.000639  -0.033187
    24  O    0.000000   0.000000  -0.000151   0.000000  -0.097629   0.000030
    25  H    0.000000   0.000000  -0.000044  -0.000003  -0.000420   0.000023
              13         14         15         16         17         18
     1  C    0.000311  -0.000556  -0.000010   0.000004   0.000000   0.000000
     2  C   -0.000727  -0.001328  -0.000020   0.000444  -0.000004   0.000002
     3  C   -0.006514   0.016135  -0.000326  -0.000452   0.000337  -0.000016
     4  C   -0.001335  -0.007096   0.000960  -0.001529  -0.000531   0.000108
     5  C   -0.001766   0.000905   0.000118  -0.000044   0.000023   0.000000
     6  C   -0.000247   0.000211   0.000021  -0.000003   0.000000   0.000001
     7  H    0.000001  -0.000001   0.000000   0.000000   0.000000   0.000000
     8  H   -0.000022  -0.000234   0.000000   0.000042   0.000000   0.000000
     9  H   -0.000008   0.000025  -0.000013   0.000001   0.000001   0.000000
    10  H    0.000000   0.000001   0.000000   0.000000   0.000000   0.000000
    11  C    0.063325  -0.021556  -0.013004  -0.000300  -0.001470   0.000244
    12  C   -0.004798   0.030643  -0.001130   0.004487   0.000012  -0.000039
    13  C   -0.094212  -0.027206  -0.030321   0.005371  -0.000017  -0.000050
    14  C   -0.027206   0.154944   0.009434  -0.010209   0.005299   0.000132
    15  C   -0.030321   0.009434   0.150873  -0.002314   0.013868  -0.000259
    16  C    0.005371  -0.010209  -0.002314  -0.063838  -0.000690  -0.000061
    17  C   -0.000017   0.005299   0.013868  -0.000690  -0.065005   0.000691
    18  H   -0.000050   0.000132  -0.000259  -0.000061   0.000691  -0.003153
    19  C    0.003468  -0.009717  -0.006591   0.016171  -0.016320   0.000324
    20  H   -0.000009  -0.000123  -0.000010   0.000811  -0.000027  -0.000002
    21  H   -0.000083  -0.000035   0.000384   0.000267  -0.000490   0.000003
    22  Br   0.000201  -0.000214  -0.003276  -0.000063   0.006181  -0.000031
    23  O   -0.000171  -0.008731  -0.000082   0.001862  -0.000008   0.000000
    24  O   -0.003437   0.000587   0.007445   0.000017   0.000220  -0.000716
    25  H   -0.000306  -0.000056   0.000040   0.000000   0.000003   0.000013
              19         20         21         22         23         24
     1  C    0.000001   0.000000   0.000000   0.000000   0.000047  -0.000049
     2  C    0.000004   0.000038   0.000000   0.000000   0.001798  -0.000016
     3  C   -0.000716  -0.000182  -0.000002   0.000000  -0.008544   0.000668
     4  C    0.000468  -0.000025   0.000002  -0.000001  -0.000238   0.000501
     5  C   -0.000002  -0.000001   0.000000   0.000000  -0.000074   0.005059
     6  C    0.000000   0.000000   0.000000   0.000000  -0.000013   0.000075
     7  H    0.000000   0.000000   0.000000   0.000000   0.000003   0.000000
     8  H    0.000000   0.000004   0.000000   0.000000  -0.001098   0.000000
     9  H    0.000000   0.000000   0.000000   0.000000   0.000000  -0.000151
    10  H    0.000000   0.000000   0.000000   0.000000   0.000000   0.000000
    11  C    0.000662  -0.000042  -0.000001   0.000055   0.000639  -0.097629
    12  C    0.000171   0.000768  -0.000004  -0.000003  -0.033187   0.000030
    13  C    0.003468  -0.000009  -0.000083   0.000201  -0.000171  -0.003437
    14  C   -0.009717  -0.000123  -0.000035  -0.000214  -0.008731   0.000587
    15  C   -0.006591  -0.000010   0.000384  -0.003276  -0.000082   0.007445
    16  C    0.016171   0.000811   0.000267  -0.000063   0.001862   0.000017
    17  C   -0.016320  -0.000027  -0.000490   0.006181  -0.000008   0.000220
    18  H    0.000324  -0.000002   0.000003  -0.000031   0.000000  -0.000716
    19  C    0.129220  -0.000426  -0.000100  -0.000107  -0.000014  -0.000096
    20  H   -0.000426   0.001010  -0.000016   0.000001  -0.001020   0.000000
    21  H   -0.000100  -0.000016  -0.002473   0.000083   0.000002   0.000000
    22  Br  -0.000107   0.000001   0.000083  -0.004561   0.000000  -0.000005
    23  O   -0.000014  -0.001020   0.000002   0.000000   0.223013  -0.000002
    24  O   -0.000096   0.000000   0.000000  -0.000005  -0.000002   0.184987
    25  H    0.000000   0.000000   0.000000   0.000000   0.000000   0.000261
              25
     1  C    0.000013
     2  C   -0.000019
     3  C   -0.000111
     4  C    0.000356
     5  C    0.000567
     6  C   -0.000019
     7  H    0.000000
     8  H    0.000000
     9  H   -0.000044
    10  H   -0.000003
    11  C   -0.000420
    12  C    0.000023
    13  C   -0.000306
    14  C   -0.000056
    15  C    0.000040
    16  C    0.000000
    17  C    0.000003
    18  H    0.000013
    19  C    0.000000
    20  H    0.000000
    21  H    0.000000
    22  Br   0.000000
    23  O    0.000000
    24  O    0.000261
    25  H   -0.003502
 Mulliken charges and spin densities:
               1          2
     1  C   -0.156103   0.126969
     2  C   -0.182787  -0.048186
     3  C    0.002810   0.137770
     4  C    0.110450  -0.108783
     5  C   -0.230467   0.136021
     6  C   -0.166396  -0.073561
     7  H    0.172798  -0.003346
     8  H    0.173777   0.000883
     9  H    0.144459  -0.003591
    10  H    0.176116   0.000558
    11  C    0.216140   0.437495
    12  C    0.185808  -0.031631
    13  C    0.097339  -0.098552
    14  C   -0.002352   0.131257
    15  C   -0.250834   0.125788
    16  C   -0.180949  -0.050025
    17  C    0.073274  -0.057929
    18  H    0.195982  -0.002809
    19  C   -0.160610   0.116399
    20  H    0.177372   0.000749
    21  H    0.185866  -0.002465
    22  Br  -0.096944  -0.001740
    23  O   -0.447460   0.174184
    24  O   -0.399402   0.097746
    25  H    0.362113  -0.003203
 Sum of Mulliken charges =   0.00000   1.00000
 Mulliken charges and spin densities with hydrogens summed into heavy atoms:
               1          2
     1  C    0.016695   0.123623
     2  C   -0.009010  -0.047303
     3  C    0.002810   0.137770
     4  C    0.110450  -0.108783
     5  C   -0.086008   0.132430
     6  C    0.009720  -0.073003
    11  C    0.216140   0.437495
    12  C    0.185808  -0.031631
    13  C    0.097339  -0.098552
    14  C   -0.002352   0.131257
    15  C   -0.054852   0.122979
    16  C   -0.003577  -0.049276
    17  C    0.073274  -0.057929
    19  C    0.025256   0.113934
    22  Br  -0.096944  -0.001740
    23  O   -0.447460   0.174184
    24  O   -0.037289   0.094543
 Electronic spatial extent (au):  <R**2>=           6274.4221
 Charge=              0.0000 electrons
 Dipole moment (field-independent basis, Debye):
    X=             -2.9649    Y=             -6.1272    Z=              0.0001  Tot=              6.8068
 Quadrupole moment (field-independent basis, Debye-Ang):
   XX=            -93.5169   YY=           -105.6195   ZZ=           -114.4461
   XY=             20.2825   XZ=             -0.0001   YZ=              0.0001
 Traceless Quadrupole moment (field-independent basis, Debye-Ang):
   XX=             11.0106   YY=             -1.0920   ZZ=             -9.9186
   XY=             20.2825   XZ=             -0.0001   YZ=              0.0001
 Octapole moment (field-independent basis, Debye-Ang**2):
  XXX=              0.7901  YYY=            -92.8057  ZZZ=             -0.0007  XYY=             42.6479
  XXY=            -43.0970  XXZ=             -0.0010  XZZ=             51.6849  YZZ=             -5.7874
  YYZ=              0.0005  XYZ=             -0.0004
 Hexadecapole moment (field-independent basis, Debye-Ang**3):
 XXXX=          -5260.7989 YYYY=          -1326.2650 ZZZZ=           -129.0020 XXXY=             63.8241
 XXXZ=              0.0121 YYYX=            167.2263 YYYZ=              0.0007 ZZZX=              0.0071
 ZZZY=              0.0012 XXYY=          -1131.8446 XXZZ=          -1105.5550 YYZZ=           -262.9875
 XXYZ=              0.0018 YYXZ=              0.0008 ZZXY=            -27.8778
 N-N= 1.391538856599D+03 E-N=-1.053922897705D+04  KE= 3.256027687496D+03
 Leave Link  601 at Tue Jan 14 06:15:19 2020, MaxMem=   134217728 cpu:         2.0
 (Enter E:\Gaussian\G09W\l9999.exe)
 1|1|UNPC-DESKTOP-K4OTQA5|SP|UM062X TD-FC|Gen|C14H8Br1O2(2)|������|14-J
 an-2020|0||#p td=(nstates=3,root=1) um062x/gen scrf=(solvent=acetonitr
 ile) guess=save geom=connectivity empiricaldispersion=gd3||2-BrHAQ exc
 ited energy||0,2|C,0,-5.083784,0.049514,-0.000013|C,0,-4.044009,0.9985
 42,0.000005|C,0,-2.711517,0.591359,0.00002|C,0,-2.424512,-0.804109,0.0
 00016|C,0,-3.468595,-1.735115,-0.000002|C,0,-4.809248,-1.305805,-0.000
 018|H,0,-6.113248,0.391279,-0.000024|H,0,-4.259153,2.058665,0.00001|H,
 0,-3.284381,-2.804494,-0.00001|H,0,-5.608066,-2.036676,-0.000032|C,0,-
 1.04058,-1.204166,0.000033|C,0,-1.630945,1.588577,0.000041|C,0,0.05499
 9,-0.265755,0.000019|C,0,-0.245379,1.122655,0.000019|C,0,1.374829,-0.7
 19508,0.000008|C,0,0.817198,2.031294,0.000004|C,0,2.419922,0.22843,-0.
 000009|H,0,1.589853,-1.778041,0.000011|C,0,2.150259,1.581263,-0.000011
 |H,0,0.599063,3.090429,0.000007|H,0,2.959944,2.301106,-0.000022|Br,0,4
 .230407,-0.396165,-0.000026|O,0,-1.896947,2.814782,-0.000015|O,0,-0.68
 576,-2.467628,0.000045|H,0,-1.438414,-3.076797,0.000054||Version=IA32W
 -G09RevD.01|State=2-A|HF=-3262.9368046|S2=0.779811|S2-1=0.|S2A=0.75063
 8|RMSD=5.924e-009|PG=C01 [X(C14H8Br1O2)]||@


 ... FOR AFTERWARDS A MAN FINDS PLEASURE IN HIS PAINS,
 WHEN HE HAS SUFFERED LONG AND WANDERED FAR.

                                    -- HOMER
 Job cpu time:       0 days 14 hours 43 minutes 57.0 seconds.
 File lengths (MBytes):  RWF=    608 Int=      0 D2E=      0 Chk=     58 Scr=      1
 Normal termination of Gaussian 09 at Tue Jan 14 06:15:24 2020.
