# Supplementary material for: 2-Bromoanthraquinone as a highly efficient photocatalyst for the oxidation of sec-aromatic alcohols: experimental and DFT study
Source: Royal Society of Chemistry journal article supplement (doi:10.1039/d0ra06414a), 2020-01-01
Supplement: d0ra06414a9.out [file d0ra06414a9.out]

 Entering Link 1 = E:\Gaussian\G09W\l1.exe PID=     94652.
  
 Copyright (c) 1988,1990,1992,1993,1995,1998,2003,2009,2013,
            Gaussian, Inc.  All Rights Reserved.
  
 This is part of the Gaussian(R) 09 program.  It is based on
 the Gaussian(R) 03 system (copyright 2003, Gaussian, Inc.),
 the Gaussian(R) 98 system (copyright 1998, Gaussian, Inc.),
 the Gaussian(R) 94 system (copyright 1995, Gaussian, Inc.),
 the Gaussian 92(TM) system (copyright 1992, Gaussian, Inc.),
 the Gaussian 90(TM) system (copyright 1990, Gaussian, Inc.),
 the Gaussian 88(TM) system (copyright 1988, Gaussian, Inc.),
 the Gaussian 86(TM) system (copyright 1986, Carnegie Mellon
 University), and the Gaussian 82(TM) system (copyright 1983,
 Carnegie Mellon University). Gaussian is a federally registered
 trademark of Gaussian, Inc.
  
 This software contains proprietary and confidential information,
 including trade secrets, belonging to Gaussian, Inc.
  
 This software is provided under written license and may be
 used, copied, transmitted, or stored only in accord with that
 written license.
  
 The following legend is applicable only to US Government
 contracts under FAR:
  
                    RESTRICTED RIGHTS LEGEND
  
 Use, reproduction and disclosure by the US Government is
 subject to restrictions as set forth in subparagraphs (a)
 and (c) of the Commercial Computer Software - Restricted
 Rights clause in FAR 52.227-19.
  
 Gaussian, Inc.
 340 Quinnipiac St., Bldg. 40, Wallingford CT 06492
  
  
 ---------------------------------------------------------------
 Warning -- This program may not be used in any manner that
 competes with the business of Gaussian, Inc. or will provide
 assistance to any competitor of Gaussian, Inc.  The licensee
 of this program is prohibited from giving any competitor of
 Gaussian, Inc. access to this program.  By using this program,
 the user acknowledges that Gaussian, Inc. is engaged in the
 business of creating and licensing software in the field of
 computational chemistry and represents and warrants to the
 licensee that it is not a competitor of Gaussian, Inc. and that
 it will not use this program in any manner prohibited above.
 ---------------------------------------------------------------
  

 Cite this work as:
 Gaussian 09, Revision D.01,
 M. J. Frisch, G. W. Trucks, H. B. Schlegel, G. E. Scuseria, 
 M. A. Robb, J. R. Cheeseman, G. Scalmani, V. Barone, B. Mennucci, 
 G. A. Petersson, H. Nakatsuji, M. Caricato, X. Li, H. P. Hratchian, 
 A. F. Izmaylov, J. Bloino, G. Zheng, J. L. Sonnenberg, M. Hada, 
 M. Ehara, K. Toyota, R. Fukuda, J. Hasegawa, M. Ishida, T. Nakajima, 
 Y. Honda, O. Kitao, H. Nakai, T. Vreven, J. A. Montgomery, Jr., 
 J. E. Peralta, F. Ogliaro, M. Bearpark, J. J. Heyd, E. Brothers, 
 K. N. Kudin, V. N. Staroverov, T. Keith, R. Kobayashi, J. Normand, 
 K. Raghavachari, A. Rendell, J. C. Burant, S. S. Iyengar, J. Tomasi, 
 M. Cossi, N. Rega, J. M. Millam, M. Klene, J. E. Knox, J. B. Cross, 
 V. Bakken, C. Adamo, J. Jaramillo, R. Gomperts, R. E. Stratmann, 
 O. Yazyev, A. J. Austin, R. Cammi, C. Pomelli, J. W. Ochterski, 
 R. L. Martin, K. Morokuma, V. G. Zakrzewski, G. A. Voth, 
 P. Salvador, J. J. Dannenberg, S. Dapprich, A. D. Daniels, 
 O. Farkas, J. B. Foresman, J. V. Ortiz, J. Cioslowski, 
 and D. J. Fox, Gaussian, Inc., Wallingford CT, 2013.
 
 ******************************************
 Gaussian 09:  IA32W-G09RevD.01 24-Apr-2013
                10-Jan-2020 
 ******************************************
 %nprocshared=2
 Will use up to    2 processors via shared memory.
 %mem=1GB
 %chk=E:\Gaussian file\2-BrHAQ excited opt.chk
 ----------------------------------------------------------------------
 #p opt td ub3lyp/6-311g(d) scrf=(solvent=acetonitrile) guess=save geom
 =connectivity empiricaldispersion=gd3bj
 ----------------------------------------------------------------------
 1/14=-1,18=20,19=15,26=3,38=1,57=2/1,3;
 2/9=110,12=2,17=6,18=5,40=1/2;
 3/5=4,6=6,7=1,11=2,16=1,25=1,30=1,70=2201,71=1,72=2,74=-5,116=2,124=41/1,2,8,3;
 4//1;
 5/5=2,38=5,53=2/2;
 8/6=1,10=2/1;
 9/15=2,42=1,70=2/14;
 10/5=4/2;
 6/7=2,8=2,9=2,10=2/1;
 7/12=6,13=5/1,2,3,16;
 1/14=-1,18=20,19=15,26=3/3(2);
 2/9=110/2;
 99//99;
 2/9=110/2;
 3/5=4,6=6,7=1,11=2,16=1,25=1,30=1,70=2205,71=1,72=2,74=-5,116=2,124=41/1,2,8,3;
 4/5=5,16=3,69=1/1;
 5/5=2,38=5,53=2/2;
 8/6=1,10=2/1;
 9/15=2,42=1,49=4,70=2/14;
 10/5=4/2;
 7/12=6,13=5/1,2,3,16;
 1/14=-1,18=20,19=15,26=3/3(-8);
 2/9=110/2;
 6/7=2,8=2,9=2,10=2/1;
 99//99;
 Leave Link    1 at Fri Jan 10 09:55:17 2020, MaxMem=   134217728 cpu:         0.0
 (Enter E:\Gaussian\G09W\l101.exe)
 -------------------
 2-BrHAQ excited opt
 -------------------
 Symbolic Z-matrix:
 Charge =  0 Multiplicity = 2
 C                    -5.06866   0.09018   0. 
 C                    -4.03102   1.00562   0.00001 
 C                    -2.69535   0.58469   0.00001 
 C                    -2.39667  -0.80954  -0.00001 
 C                    -3.47597  -1.72737  -0.00003 
 C                    -4.78289  -1.28505  -0.00003 
 H                    -6.09763   0.43056   0.00001 
 H                    -4.22541   2.07102   0.00002 
 H                    -3.30337  -2.7985   -0.00008 
 H                    -5.59165  -2.00678  -0.00005 
 C                    -1.03435  -1.2299    0.00001 
 C                    -1.6288    1.59945   0.00001 
 C                     0.03513  -0.28867   0. 
 C                    -0.24554   1.10327  -0.00001 
 C                     1.38196  -0.72363   0.00001 
 C                     0.81601   2.01736  -0.00002 
 C                     2.39188   0.21211  -0.00001 
 H                     1.60214  -1.78149   0.00002 
 C                     2.13157   1.59193  -0.00002 
 H                     0.58143   3.07452  -0.00002 
 H                     2.9456    2.30502  -0.00003 
 Br                    4.21583  -0.37985  0. 
 O                    -1.88364   2.81113   0.00003 
 O                    -0.66867  -2.52663   0.00003 
 H                    -1.43056  -3.11821   0.00015 
 
 NAtoms=     25 NQM=       25 NQMF=       0 NMMI=      0 NMMIF=      0
                NMic=       0 NMicF=      0.
                    Isotopes and Nuclear Properties:
 (Nuclear quadrupole moments (NQMom) in fm**2, nuclear magnetic moments (NMagM)
  in nuclear magnetons)

  Atom         1           2           3           4           5           6           7           8           9          10
 IAtWgt=          12          12          12          12          12          12           1           1           1           1
 AtmWgt=  12.0000000  12.0000000  12.0000000  12.0000000  12.0000000  12.0000000   1.0078250   1.0078250   1.0078250   1.0078250
 NucSpn=           0           0           0           0           0           0           1           1           1           1
 AtZEff=   0.0000000   0.0000000   0.0000000   0.0000000   0.0000000   0.0000000   0.0000000   0.0000000   0.0000000   0.0000000
 NQMom=    0.0000000   0.0000000   0.0000000   0.0000000   0.0000000   0.0000000   0.0000000   0.0000000   0.0000000   0.0000000
 NMagM=    0.0000000   0.0000000   0.0000000   0.0000000   0.0000000   0.0000000   2.7928460   2.7928460   2.7928460   2.7928460
 AtZNuc=   6.0000000   6.0000000   6.0000000   6.0000000   6.0000000   6.0000000   1.0000000   1.0000000   1.0000000   1.0000000

  Atom        11          12          13          14          15          16          17          18          19          20
 IAtWgt=          12          12          12          12          12          12          12           1          12           1
 AtmWgt=  12.0000000  12.0000000  12.0000000  12.0000000  12.0000000  12.0000000  12.0000000   1.0078250  12.0000000   1.0078250
 NucSpn=           0           0           0           0           0           0           0           1           0           1
 AtZEff=   0.0000000   0.0000000   0.0000000   0.0000000   0.0000000   0.0000000   0.0000000   0.0000000   0.0000000   0.0000000
 NQMom=    0.0000000   0.0000000   0.0000000   0.0000000   0.0000000   0.0000000   0.0000000   0.0000000   0.0000000   0.0000000
 NMagM=    0.0000000   0.0000000   0.0000000   0.0000000   0.0000000   0.0000000   0.0000000   2.7928460   0.0000000   2.7928460
 AtZNuc=   6.0000000   6.0000000   6.0000000   6.0000000   6.0000000   6.0000000   6.0000000   1.0000000   6.0000000   1.0000000

  Atom        21          22          23          24          25
 IAtWgt=           1          79          16          16           1
 AtmWgt=   1.0078250  78.9183361  15.9949146  15.9949146   1.0078250
 NucSpn=           1           3           0           0           1
 AtZEff=   0.0000000   0.0000000   0.0000000   0.0000000   0.0000000
 NQMom=    0.0000000  31.3000000   0.0000000   0.0000000   0.0000000
 NMagM=    2.7928460   2.1063990   0.0000000   0.0000000   2.7928460
 AtZNuc=   1.0000000  35.0000000   8.0000000   8.0000000   1.0000000
 Leave Link  101 at Fri Jan 10 09:55:18 2020, MaxMem=   134217728 cpu:         0.0
 (Enter E:\Gaussian\G09W\l103.exe)

 GradGradGradGradGradGradGradGradGradGradGradGradGradGradGradGradGradGrad
 Berny optimization.
 Initialization pass.
                           ----------------------------
                           !    Initial Parameters    !
                           ! (Angstroms and Degrees)  !
 --------------------------                            --------------------------
 ! Name  Definition              Value          Derivative Info.                !
 --------------------------------------------------------------------------------
 ! R1    R(1,2)                  1.3837         estimate D2E/DX2                !
 ! R2    R(1,6)                  1.4046         estimate D2E/DX2                !
 ! R3    R(1,7)                  1.0838         estimate D2E/DX2                !
 ! R4    R(2,3)                  1.4004         estimate D2E/DX2                !
 ! R5    R(2,8)                  1.083          estimate D2E/DX2                !
 ! R6    R(3,4)                  1.4259         estimate D2E/DX2                !
 ! R7    R(3,12)                 1.4722         estimate D2E/DX2                !
 ! R8    R(4,5)                  1.4168         estimate D2E/DX2                !
 ! R9    R(4,11)                 1.4257         estimate D2E/DX2                !
 ! R10   R(5,6)                  1.3797         estimate D2E/DX2                !
 ! R11   R(5,9)                  1.0849         estimate D2E/DX2                !
 ! R12   R(6,10)                 1.084          estimate D2E/DX2                !
 ! R13   R(11,13)                1.4247         estimate D2E/DX2                !
 ! R14   R(11,24)                1.3473         estimate D2E/DX2                !
 ! R15   R(12,14)                1.4696         estimate D2E/DX2                !
 ! R16   R(12,23)                1.2382         estimate D2E/DX2                !
 ! R17   R(13,14)                1.42           estimate D2E/DX2                !
 ! R18   R(13,15)                1.4153         estimate D2E/DX2                !
 ! R19   R(14,16)                1.4009         estimate D2E/DX2                !
 ! R20   R(15,17)                1.3768         estimate D2E/DX2                !
 ! R21   R(15,18)                1.0805         estimate D2E/DX2                !
 ! R22   R(16,19)                1.3826         estimate D2E/DX2                !
 ! R23   R(16,20)                1.0829         estimate D2E/DX2                !
 ! R24   R(17,19)                1.4042         estimate D2E/DX2                !
 ! R25   R(17,22)                1.9176         estimate D2E/DX2                !
 ! R26   R(19,21)                1.0822         estimate D2E/DX2                !
 ! R27   R(24,25)                0.9646         estimate D2E/DX2                !
 ! A1    A(2,1,6)              119.6813         estimate D2E/DX2                !
 ! A2    A(2,1,7)              120.2762         estimate D2E/DX2                !
 ! A3    A(6,1,7)              120.0426         estimate D2E/DX2                !
 ! A4    A(1,2,3)              121.0881         estimate D2E/DX2                !
 ! A5    A(1,2,8)              121.08           estimate D2E/DX2                !
 ! A6    A(3,2,8)              117.8319         estimate D2E/DX2                !
 ! A7    A(2,3,4)              119.5834         estimate D2E/DX2                !
 ! A8    A(2,3,12)             118.9337         estimate D2E/DX2                !
 ! A9    A(4,3,12)             121.4829         estimate D2E/DX2                !
 ! A10   A(3,4,5)              118.2861         estimate D2E/DX2                !
 ! A11   A(3,4,11)             119.2398         estimate D2E/DX2                !
 ! A12   A(5,4,11)             122.4741         estimate D2E/DX2                !
 ! A13   A(4,5,6)              120.9244         estimate D2E/DX2                !
 ! A14   A(4,5,9)              121.2236         estimate D2E/DX2                !
 ! A15   A(6,5,9)              117.852          estimate D2E/DX2                !
 ! A16   A(1,6,5)              120.4367         estimate D2E/DX2                !
 ! A17   A(1,6,10)             120.0072         estimate D2E/DX2                !
 ! A18   A(5,6,10)             119.5561         estimate D2E/DX2                !
 ! A19   A(4,11,13)            121.5012         estimate D2E/DX2                !
 ! A20   A(4,11,24)            122.897          estimate D2E/DX2                !
 ! A21   A(13,11,24)           115.6018         estimate D2E/DX2                !
 ! A22   A(3,12,14)            116.6928         estimate D2E/DX2                !
 ! A23   A(3,12,23)            121.6972         estimate D2E/DX2                !
 ! A24   A(14,12,23)           121.61           estimate D2E/DX2                !
 ! A25   A(11,13,14)           119.95           estimate D2E/DX2                !
 ! A26   A(11,13,15)           120.7516         estimate D2E/DX2                !
 ! A27   A(14,13,15)           119.2984         estimate D2E/DX2                !
 ! A28   A(12,14,13)           121.1332         estimate D2E/DX2                !
 ! A29   A(12,14,16)           119.5361         estimate D2E/DX2                !
 ! A30   A(13,14,16)           119.3307         estimate D2E/DX2                !
 ! A31   A(13,15,17)           119.2855         estimate D2E/DX2                !
 ! A32   A(13,15,18)           119.6557         estimate D2E/DX2                !
 ! A33   A(17,15,18)           121.0588         estimate D2E/DX2                !
 ! A34   A(14,16,19)           121.3489         estimate D2E/DX2                !
 ! A35   A(14,16,20)           118.2198         estimate D2E/DX2                !
 ! A36   A(19,16,20)           120.4313         estimate D2E/DX2                !
 ! A37   A(15,17,19)           122.1329         estimate D2E/DX2                !
 ! A38   A(15,17,22)           119.2028         estimate D2E/DX2                !
 ! A39   A(19,17,22)           118.6643         estimate D2E/DX2                !
 ! A40   A(16,19,17)           118.6036         estimate D2E/DX2                !
 ! A41   A(16,19,21)           120.8618         estimate D2E/DX2                !
 ! A42   A(17,19,21)           120.5345         estimate D2E/DX2                !
 ! A43   A(11,24,25)           112.0795         estimate D2E/DX2                !
 ! D1    D(6,1,2,3)             -0.0005         estimate D2E/DX2                !
 ! D2    D(6,1,2,8)            179.9992         estimate D2E/DX2                !
 ! D3    D(7,1,2,3)            179.9996         estimate D2E/DX2                !
 ! D4    D(7,1,2,8)             -0.0006         estimate D2E/DX2                !
 ! D5    D(2,1,6,5)              0.0005         estimate D2E/DX2                !
 ! D6    D(2,1,6,10)          -179.9992         estimate D2E/DX2                !
 ! D7    D(7,1,6,5)           -179.9997         estimate D2E/DX2                !
 ! D8    D(7,1,6,10)             0.0007         estimate D2E/DX2                !
 ! D9    D(1,2,3,4)             -0.0001         estimate D2E/DX2                !
 ! D10   D(1,2,3,12)           179.9995         estimate D2E/DX2                !
 ! D11   D(8,2,3,4)           -179.9999         estimate D2E/DX2                !
 ! D12   D(8,2,3,12)            -0.0003         estimate D2E/DX2                !
 ! D13   D(2,3,4,5)              0.0008         estimate D2E/DX2                !
 ! D14   D(2,3,4,11)          -179.999          estimate D2E/DX2                !
 ! D15   D(12,3,4,5)          -179.9988         estimate D2E/DX2                !
 ! D16   D(12,3,4,11)            0.0014         estimate D2E/DX2                !
 ! D17   D(2,3,12,14)         -179.9996         estimate D2E/DX2                !
 ! D18   D(2,3,12,23)            0.0006         estimate D2E/DX2                !
 ! D19   D(4,3,12,14)            0.0            estimate D2E/DX2                !
 ! D20   D(4,3,12,23)         -179.9998         estimate D2E/DX2                !
 ! D21   D(3,4,5,6)             -0.0008         estimate D2E/DX2                !
 ! D22   D(3,4,5,9)            179.9978         estimate D2E/DX2                !
 ! D23   D(11,4,5,6)           179.9989         estimate D2E/DX2                !
 ! D24   D(11,4,5,9)            -0.0025         estimate D2E/DX2                !
 ! D25   D(3,4,11,13)           -0.0019         estimate D2E/DX2                !
 ! D26   D(3,4,11,24)          179.9985         estimate D2E/DX2                !
 ! D27   D(5,4,11,13)          179.9984         estimate D2E/DX2                !
 ! D28   D(5,4,11,24)           -0.0012         estimate D2E/DX2                !
 ! D29   D(4,5,6,1)              0.0002         estimate D2E/DX2                !
 ! D30   D(4,5,6,10)           179.9998         estimate D2E/DX2                !
 ! D31   D(9,5,6,1)           -179.9984         estimate D2E/DX2                !
 ! D32   D(9,5,6,10)             0.0012         estimate D2E/DX2                !
 ! D33   D(4,11,13,14)           0.0008         estimate D2E/DX2                !
 ! D34   D(4,11,13,15)        -179.9994         estimate D2E/DX2                !
 ! D35   D(24,11,13,14)       -179.9995         estimate D2E/DX2                !
 ! D36   D(24,11,13,15)          0.0002         estimate D2E/DX2                !
 ! D37   D(4,11,24,25)          -0.0079         estimate D2E/DX2                !
 ! D38   D(13,11,24,25)        179.9924         estimate D2E/DX2                !
 ! D39   D(3,12,14,13)          -0.0011         estimate D2E/DX2                !
 ! D40   D(3,12,14,16)         179.9995         estimate D2E/DX2                !
 ! D41   D(23,12,14,13)        179.9988         estimate D2E/DX2                !
 ! D42   D(23,12,14,16)         -0.0007         estimate D2E/DX2                !
 ! D43   D(11,13,14,12)          0.0007         estimate D2E/DX2                !
 ! D44   D(11,13,14,16)       -179.9999         estimate D2E/DX2                !
 ! D45   D(15,13,14,12)       -179.9991         estimate D2E/DX2                !
 ! D46   D(15,13,14,16)          0.0004         estimate D2E/DX2                !
 ! D47   D(11,13,15,17)        179.9998         estimate D2E/DX2                !
 ! D48   D(11,13,15,18)         -0.0002         estimate D2E/DX2                !
 ! D49   D(14,13,15,17)         -0.0004         estimate D2E/DX2                !
 ! D50   D(14,13,15,18)        179.9996         estimate D2E/DX2                !
 ! D51   D(12,14,16,19)        179.9994         estimate D2E/DX2                !
 ! D52   D(12,14,16,20)         -0.0005         estimate D2E/DX2                !
 ! D53   D(13,14,16,19)         -0.0001         estimate D2E/DX2                !
 ! D54   D(13,14,16,20)        180.0            estimate D2E/DX2                !
 ! D55   D(13,15,17,19)          0.0002         estimate D2E/DX2                !
 ! D56   D(13,15,17,22)       -179.9999         estimate D2E/DX2                !
 ! D57   D(18,15,17,19)       -179.9999         estimate D2E/DX2                !
 ! D58   D(18,15,17,22)          0.0001         estimate D2E/DX2                !
 ! D59   D(14,16,19,17)         -0.0002         estimate D2E/DX2                !
 ! D60   D(14,16,19,21)       -179.9999         estimate D2E/DX2                !
 ! D61   D(20,16,19,17)        179.9997         estimate D2E/DX2                !
 ! D62   D(20,16,19,21)          0.0            estimate D2E/DX2                !
 ! D63   D(15,17,19,16)          0.0002         estimate D2E/DX2                !
 ! D64   D(15,17,19,21)        179.9999         estimate D2E/DX2                !
 ! D65   D(22,17,19,16)       -179.9998         estimate D2E/DX2                !
 ! D66   D(22,17,19,21)         -0.0001         estimate D2E/DX2                !
 --------------------------------------------------------------------------------
 Trust Radius=3.00D-01 FncErr=1.00D-07 GrdErr=1.00D-06
 Number of steps in this run=    146 maximum allowed number of steps=    150.
 GradGradGradGradGradGradGradGradGradGradGradGradGradGradGradGradGradGrad

 Leave Link  103 at Fri Jan 10 09:55:18 2020, MaxMem=   134217728 cpu:         0.0
 (Enter E:\Gaussian\G09W\l202.exe)
                          Input orientation:                          
 ---------------------------------------------------------------------
 Center     Atomic      Atomic             Coordinates (Angstroms)
 Number     Number       Type             X           Y           Z
 ---------------------------------------------------------------------
      1          6           0       -5.068660    0.090181    0.000001
      2          6           0       -4.031023    1.005624    0.000013
      3          6           0       -2.695349    0.584694    0.000008
      4          6           0       -2.396670   -0.809539   -0.000007
      5          6           0       -3.475974   -1.727369   -0.000033
      6          6           0       -4.782894   -1.285051   -0.000027
      7          1           0       -6.097632    0.430558    0.000011
      8          1           0       -4.225405    2.071015    0.000022
      9          1           0       -3.303373   -2.798496   -0.000081
     10          1           0       -5.591646   -2.006785   -0.000050
     11          6           0       -1.034349   -1.229904    0.000010
     12          6           0       -1.628799    1.599446    0.000009
     13          6           0        0.035134   -0.288673    0.000002
     14          6           0       -0.245541    1.103273   -0.000006
     15          6           0        1.381959   -0.723634    0.000007
     16          6           0        0.816012    2.017355   -0.000017
     17          6           0        2.391883    0.212107   -0.000005
     18          1           0        1.602141   -1.781485    0.000020
     19          6           0        2.131571    1.591933   -0.000019
     20          1           0        0.581427    3.074516   -0.000023
     21          1           0        2.945604    2.305020   -0.000026
     22         35           0        4.215831   -0.379851   -0.000002
     23          8           0       -1.883636    2.811130    0.000025
     24          8           0       -0.668669   -2.526633    0.000027
     25          1           0       -1.430559   -3.118213    0.000150
 ---------------------------------------------------------------------
                    Distance matrix (angstroms):
                    1          2          3          4          5
     1  C    0.000000
     2  C    1.383736   0.000000
     3  C    2.424283   1.400431   0.000000
     4  C    2.819402   2.442525   1.425866   0.000000
     5  C    2.416637   2.788786   2.440289   1.416795   0.000000
     6  C    1.404609   2.410913   2.802462   2.433141   1.379741
     7  H    1.083808   2.145128   3.405773   3.903199   3.395547
     8  H    2.152854   1.082978   2.133125   3.412017   3.871610
     9  H    3.385365   3.873087   3.437393   2.185877   1.084944
    10  H    2.161199   3.392662   3.886425   3.411930   2.134043
    11  C    4.244796   3.738668   2.460018   1.425702   2.491787
    12  C    3.756398   2.474531   1.472158   2.528406   3.805227
    13  C    5.117836   4.267181   2.866759   2.486960   3.794433
    14  C    4.928370   3.786741   2.504093   2.878577   4.295140
    15  C    6.501752   5.682491   4.282075   3.779605   4.960544
    16  C    6.192202   4.951500   3.792384   4.279329   5.695972
    17  C    7.461539   6.471738   5.100858   4.896325   6.180074
    18  H    6.928399   6.284943   4.905836   4.115236   5.078403
    19  C    7.355174   6.190422   4.930891   5.125625   6.516312
    20  H    6.389815   5.055196   4.115395   4.894379   6.286541
    21  H    8.314682   7.096602   5.897446   6.183880   7.582666
    22  Br   9.296381   8.362424   6.978163   6.626447   7.808948
    23  O    4.189026   2.805552   2.369788   3.656836   4.809731
    24  O    5.119339   4.876706   3.713191   2.436062   2.918867
    25  H    4.850729   4.875289   3.912955   2.502668   2.473493
                    6          7          8          9         10
     6  C    0.000000
     7  H    2.161446   0.000000
     8  H    3.402054   2.489243   0.000000
     9  H    2.116482   4.270208   4.956035   0.000000
    10  H    1.083965   2.489310   4.300589   2.421363   0.000000
    11  C    3.748951   5.328599   4.591177   2.758433   4.623040
    12  C    4.274183   4.619174   2.639079   4.705963   5.358083
    13  C    4.919976   6.174797   4.870351   4.176702   5.883244
    14  C    5.127540   5.890629   4.095832   4.957231   6.184925
    15  C    6.190364   7.568120   6.265189   5.124196   7.090673
    16  C    6.500280   7.093405   5.041703   6.337330   7.566491
    17  C    7.329318   8.492325   6.873430   6.442024   8.286146
    18  H    6.404305   8.011220   6.985846   5.009828   7.197314
    19  C    7.489116   8.310751   6.375003   6.986736   8.520496
    20  H    6.912435   7.183338   4.910463   7.041587   7.995402
    21  H    8.521637   9.235460   7.174826   8.068184   9.564324
    22  Br   9.044138  10.345254   8.789836   7.898625   9.941505
    23  O    5.018406   4.839926   2.455942   5.786498   6.079609
    24  O    4.297485   6.182121   5.812808   2.648693   4.950348
    25  H    3.820816   5.863049   5.894001   1.899908   4.306961
                   11         12         13         14         15
    11  C    0.000000
    12  C    2.891123   0.000000
    13  C    1.424679   2.516678   0.000000
    14  C    2.462911   1.469554   1.419962   0.000000
    15  C    2.468776   3.802810   1.415319   2.446701   0.000000
    16  C    3.737449   2.480272   2.434653   1.400871   2.798806
    17  C    3.717319   4.253304   2.409366   2.783915   1.376793
    18  H    2.693570   4.676502   2.164255   3.425749   1.080522
    19  C    4.240968   3.760378   2.816332   2.426819   2.433879
    20  H    4.597691   2.657241   3.407268   2.137680   3.881597
    21  H    5.323130   4.628498   3.898471   3.409927   3.408479
    22  Br   5.318551   6.170682   4.181691   4.701436   2.854648
    23  O    4.129315   1.238192   3.645608   2.366460   4.812345
    24  O    1.347304   4.236317   2.346019   3.654484   2.730546
    25  H    1.929428   4.721822   3.186621   4.384656   3.693815
                   16         17         18         19         20
    16  C    0.000000
    17  C    2.396308   0.000000
    18  H    3.879328   2.144318   0.000000
    19  C    1.382635   1.404166   3.414710   0.000000
    20  H    1.082876   3.386907   4.962117   2.144994   0.000000
    21  H    2.148933   2.164923   4.301676   1.082194   2.486254
    22  Br   4.159972   1.917603   2.965797   2.869159   5.014134
    23  O    2.813926   5.003497   5.765653   4.196228   2.479094
    24  O    4.780387   4.107028   2.389942   4.980354   5.738955
    25  H    5.605456   5.069723   3.314229   5.905442   6.511373
                   21         22         23         24         25
    21  H    0.000000
    22  Br   2.970187   0.000000
    23  O    4.855688   6.883739   0.000000
    24  O    6.033891   5.335449   5.474291   0.000000
    25  H    6.968663   6.275376   5.946628   0.964595   0.000000
 Stoichiometry    C14H8BrO2(2)
 Framework group  C1[X(C14H8BrO2)]
 Deg. of freedom    69
 Full point group                 C1      NOp   1
 Largest Abelian subgroup         C1      NOp   1
 Largest concise Abelian subgroup C1      NOp   1
                         Standard orientation:                         
 ---------------------------------------------------------------------
 Center     Atomic      Atomic             Coordinates (Angstroms)
 Number     Number       Type             X           Y           Z
 ---------------------------------------------------------------------
      1          6           0       -5.068660    0.090181    0.000001
      2          6           0       -4.031023    1.005624    0.000013
      3          6           0       -2.695349    0.584694    0.000008
      4          6           0       -2.396670   -0.809539   -0.000007
      5          6           0       -3.475974   -1.727369   -0.000033
      6          6           0       -4.782894   -1.285051   -0.000027
      7          1           0       -6.097632    0.430558    0.000011
      8          1           0       -4.225405    2.071015    0.000022
      9          1           0       -3.303373   -2.798496   -0.000081
     10          1           0       -5.591646   -2.006785   -0.000050
     11          6           0       -1.034349   -1.229904    0.000010
     12          6           0       -1.628799    1.599446    0.000009
     13          6           0        0.035134   -0.288673    0.000002
     14          6           0       -0.245541    1.103273   -0.000006
     15          6           0        1.381959   -0.723634    0.000007
     16          6           0        0.816012    2.017355   -0.000017
     17          6           0        2.391883    0.212107   -0.000005
     18          1           0        1.602141   -1.781485    0.000020
     19          6           0        2.131571    1.591933   -0.000019
     20          1           0        0.581427    3.074516   -0.000023
     21          1           0        2.945604    2.305020   -0.000026
     22         35           0        4.215831   -0.379851   -0.000002
     23          8           0       -1.883636    2.811130    0.000025
     24          8           0       -0.668669   -2.526633    0.000027
     25          1           0       -1.430559   -3.118213    0.000150
 ---------------------------------------------------------------------
 Rotational constants (GHZ):      0.9830221      0.1774932      0.1503468
 Leave Link  202 at Fri Jan 10 09:55:18 2020, MaxMem=   134217728 cpu:         0.0
 (Enter E:\Gaussian\G09W\l301.exe)
 Standard basis: 6-311G(d) (5D, 7F)
 Ernie: Thresh=  0.10000D-02 Tol=  0.10000D-05 Strict=F.
 There are   375 symmetry adapted cartesian basis functions of A   symmetry.
 There are   356 symmetry adapted basis functions of A   symmetry.
   356 basis functions,   642 primitive gaussians,   375 cartesian basis functions
    72 alpha electrons       71 beta electrons
       nuclear repulsion energy      1393.0868326739 Hartrees.
 IExCor=  402 DFT=T Ex+Corr=B3LYP ExCW=0 ScaHFX=  0.200000
 ScaDFX=  0.800000  0.720000  1.000000  0.810000 ScalE2=  1.000000  1.000000
 IRadAn=      0 IRanWt=     -1 IRanGd=            0 ICorTp=0 IEmpDi=141
 NAtoms=   25 NActive=   25 NUniq=   25 SFac= 1.00D+00 NAtFMM=   60 NAOKFM=F Big=F
 Integral buffers will be    262144 words long.
 Raffenetti 2 integral format.
 Two-electron integral symmetry is turned on.
 R6Disp:  Grimme-D3(BJ) Dispersion energy=       -0.0633815805 Hartrees.
 Nuclear repulsion after empirical dispersion term =     1393.0234510934 Hartrees.
 ------------------------------------------------------------------------------
 Polarizable Continuum Model (PCM)
 =================================
 Model                : PCM (using non-symmetric T matrix).
 Atomic radii         : UFF (Universal Force Field).
 Polarization charges : Total charges.
 Charge compensation  : None.
 Solution method      : On-the-fly selection.
 Cavity type          : Scaled VdW (van der Waals Surface) (Alpha=1.100).
 Cavity algorithm     : GePol (No added spheres)
                        Default sphere list used, NSphG=   25.
                        Lebedev-Laikov grids with approx.  5.0 points / Ang**2.
                        Smoothing algorithm: Karplus/York (Gamma=1.0000).
                        Polarization charges: spherical gaussians, with
                                              point-specific exponents (IZeta= 3).
                        Self-potential: point-specific (ISelfS= 7).
                        Self-field    : sphere-specific E.n sum rule (ISelfD= 2).
 1st derivatives      : Analytical E(r).r(x)/FMM algorithm (CHGder, D1EAlg=3).
                        Cavity 1st derivative terms included.
 Solvent              : Acetonitrile, Eps=  35.688000 Eps(inf)=   1.806874
 ------------------------------------------------------------------------------
 GePol: Number of generator spheres                  =      25
 GePol: Total number of spheres                      =      25
 GePol: Number of exposed spheres                    =      25 (100.00%)
 GePol: Number of points                             =    2193
 GePol: Average weight of points                     =       0.13
 GePol: Minimum weight of points                     =   0.43D-10
 GePol: Maximum weight of points                     =    0.20577
 GePol: Number of points with low weight             =     139
 GePol: Fraction of low-weight points (<1% of avg)   =       6.34%
 GePol: Cavity surface area                          =    281.127 Ang**2
 GePol: Cavity volume                                =    308.172 Ang**3
 Leave Link  301 at Fri Jan 10 09:55:20 2020, MaxMem=   134217728 cpu:         1.0
 (Enter E:\Gaussian\G09W\l302.exe)
 NPDir=0 NMtPBC=     1 NCelOv=     1 NCel=       1 NClECP=     1 NCelD=      1
         NCelK=      1 NCelE2=     1 NClLst=     1 CellRange=     0.0.
 One-electron integrals computed using PRISM.
 NBasis=   356 RedAO= T EigKep=  8.58D-05  NBF=   356
 NBsUse=   356 1.00D-06 EigRej= -1.00D+00 NBFU=   356
 Precomputing XC quadrature grid using
 IXCGrd= 4 IRadAn=           0 IRanWt=          -1 IRanGd=           0 AccXCQ= 0.00D+00.
 Generated NRdTot=       0 NPtTot=           0 NUsed=           0 NTot=          16
 NSgBfM=   363   363   364   364   364 MxSgAt=    25 MxSgA2=    25.
 Leave Link  302 at Fri Jan 10 09:55:23 2020, MaxMem=   134217728 cpu:         3.0
 (Enter E:\Gaussian\G09W\l308.exe)
 Leave Link  308 at Fri Jan 10 09:55:24 2020, MaxMem=   134217728 cpu:         1.0
 (Enter E:\Gaussian\G09W\l303.exe)
 DipDrv:  MaxL=1.
 Leave Link  303 at Fri Jan 10 09:55:24 2020, MaxMem=   134217728 cpu:         0.0
 (Enter E:\Gaussian\G09W\l401.exe)
 ExpMin= 1.03D-01 ExpMax= 4.40D+05 ExpMxC= 1.51D+04 IAcc=2 IRadAn=         4 AccDes= 0.00D+00
 Harris functional with IExCor=  402 and IRadAn=       4 diagonalized for initial guess.
 HarFok:  IExCor=  402 AccDes= 0.00D+00 IRadAn=         4 IDoV= 1 UseB2=F ITyADJ=14
 ICtDFT=  3500011 ScaDFX=  1.000000  1.000000  1.000000  1.000000
 FoFCou: FMM=F IPFlag=           0 FMFlag=      100000 FMFlg1=           0
         NFxFlg=           0 DoJE=T BraDBF=F KetDBF=T FulRan=T
         wScrn=  0.000000 ICntrl=     500 IOpCl=  0 I1Cent=   200000004 NGrid=           0
         NMat0=    1 NMatS0=      1 NMatT0=    0 NMatD0=    1 NMtDS0=    0 NMtDT0=    0
 Petite list used in FoFCou.
 Harris En= -3263.19694437689    
 JPrj=0 DoOrth=F DoCkMO=F.
 Initial guess <Sx>= 0.0000 <Sy>= 0.0000 <Sz>= 0.5000 <S**2>= 0.7500 S= 0.5000
 Leave Link  401 at Fri Jan 10 09:55:41 2020, MaxMem=   134217728 cpu:        17.0
 (Enter E:\Gaussian\G09W\l502.exe)
 UHF open shell SCF:
 Using DIIS extrapolation, IDIIS=  1040.
 Integral symmetry usage will be decided dynamically.
 IVT=      444890 IEndB=      444890 NGot=   134217728 MDV=   133930479
 LenX=   133930479 LenY=   133789413
 Requested convergence on RMS density matrix=1.00D-08 within 128 cycles.
 Requested convergence on MAX density matrix=1.00D-06.
 Requested convergence on             energy=1.00D-06.
 No special actions if energy rises.
 Fock matrices will be formed incrementally for  20 cycles.

 Cycle   1  Pass 1  IDiag  1:
 FoFJK:  IHMeth= 1 ICntrl=       0 DoSepK=F KAlg= 0 I1Cent=   0 FoldK=F
 IRaf= 780000000 NMat=   1 IRICut=       1 DoRegI=T DoRafI=F ISym2E= 0.
 FoFCou: FMM=F IPFlag=           0 FMFlag=      100000 FMFlg1=           0
         NFxFlg=           0 DoJE=F BraDBF=F KetDBF=F FulRan=T
         wScrn=  0.000000 ICntrl=       0 IOpCl=  1 I1Cent=           0 NGrid=           0
         NMat0=    1 NMatS0=      1 NMatT0=    0 NMatD0=    1 NMtDS0=    0 NMtDT0=    0
 Symmetry not used in FoFCou.
 Inv3:  Mode=1 IEnd=    14427747.
 Iteration    1 A*A^-1 deviation from unit magnitude is 2.44D-15 for   1121.
 Iteration    1 A*A^-1 deviation from orthogonality  is 2.08D-15 for   1687    862.
 Iteration    1 A^-1*A deviation from unit magnitude is 2.66D-15 for    341.
 Iteration    1 A^-1*A deviation from orthogonality  is 1.14D-13 for   1607   1573.
 E= -3262.75734179029    
 DIIS: error= 8.88D-02 at cycle   1 NSaved=   1.
 NSaved= 1 IEnMin= 1 EnMin= -3262.75734179029     IErMin= 1 ErrMin= 8.88D-02
 ErrMax= 8.88D-02  0.00D+00 EMaxC= 1.00D-01 BMatC= 6.33D+00 BMatP= 6.33D+00
 IDIUse=3 WtCom= 1.12D-01 WtEn= 8.88D-01
 Coeff-Com:  0.100D+01
 Coeff-En:   0.100D+01
 Coeff:      0.100D+01
 Gap=     0.130 Goal=   None    Shift=    0.000
 Gap=     0.154 Goal=   None    Shift=    0.000
 GapD=    0.130 DampG=1.000 DampE=0.500 DampFc=0.5000 IDamp=-1.
 Damping current iteration by 5.00D-01
 RMSDP=8.16D-03 MaxDP=3.36D-01              OVMax= 3.30D-01

 Cycle   2  Pass 1  IDiag  1:
 RMSU=  4.07D-03    CP:  1.02D+00
 E= -3262.89309843415     Delta-E=       -0.135756643854 Rises=F Damp=T
 DIIS: error= 3.38D-02 at cycle   2 NSaved=   2.
 NSaved= 2 IEnMin= 2 EnMin= -3262.89309843415     IErMin= 2 ErrMin= 3.38D-02
 ErrMax= 3.38D-02  0.00D+00 EMaxC= 1.00D-01 BMatC= 9.45D-01 BMatP= 6.33D+00
 IDIUse=3 WtCom= 6.62D-01 WtEn= 3.38D-01
 Coeff-Com: -0.187D+00 0.119D+01
 Coeff-En:   0.217D+00 0.783D+00
 Coeff:     -0.506D-01 0.105D+01
 Gap=     0.235 Goal=   None    Shift=    0.000
 Gap=     0.204 Goal=   None    Shift=    0.000
 RMSDP=3.23D-03 MaxDP=1.38D-01 DE=-1.36D-01 OVMax= 2.68D-01

 Cycle   3  Pass 1  IDiag  1:
 RMSU=  1.50D-03    CP:  1.00D+00  3.01D-01
 E= -3262.97860906835     Delta-E=       -0.085510634203 Rises=F Damp=F
 DIIS: error= 3.53D-02 at cycle   3 NSaved=   3.
 NSaved= 3 IEnMin= 3 EnMin= -3262.97860906835     IErMin= 2 ErrMin= 3.38D-02
 ErrMax= 3.53D-02  0.00D+00 EMaxC= 1.00D-01 BMatC= 7.36D-01 BMatP= 9.45D-01
 IDIUse=3 WtCom= 6.47D-01 WtEn= 3.53D-01
 Coeff-Com: -0.214D+00 0.652D+00 0.562D+00
 Coeff-En:   0.000D+00 0.289D+00 0.711D+00
 Coeff:     -0.138D+00 0.524D+00 0.615D+00
 Gap=     0.119 Goal=   None    Shift=    0.000
 Gap=     0.126 Goal=   None    Shift=    0.000
 RMSDP=3.03D-03 MaxDP=1.32D-01 DE=-8.55D-02 OVMax= 2.23D-01

 Cycle   4  Pass 1  IDiag  1:
 RMSU=  9.30D-04    CP:  1.02D+00  9.53D-01  2.63D-01
 E= -3263.05342621178     Delta-E=       -0.074817143427 Rises=F Damp=F
 DIIS: error= 2.53D-02 at cycle   4 NSaved=   4.
 NSaved= 4 IEnMin= 4 EnMin= -3263.05342621178     IErMin= 4 ErrMin= 2.53D-02
 ErrMax= 2.53D-02  0.00D+00 EMaxC= 1.00D-01 BMatC= 3.42D-01 BMatP= 7.36D-01
 IDIUse=3 WtCom= 7.47D-01 WtEn= 2.53D-01
 Coeff-Com: -0.794D-01 0.203D+00 0.437D+00 0.439D+00
 Coeff-En:   0.000D+00 0.000D+00 0.365D+00 0.635D+00
 Coeff:     -0.593D-01 0.152D+00 0.419D+00 0.489D+00
 Gap=     0.111 Goal=   None    Shift=    0.000
 Gap=     0.145 Goal=   None    Shift=    0.000
 RMSDP=1.66D-03 MaxDP=7.91D-02 DE=-7.48D-02 OVMax= 8.42D-02

 Cycle   5  Pass 1  IDiag  1:
 RMSU=  3.11D-04    CP:  1.01D+00  6.08D-01  6.91D-01  4.58D-01
 E= -3263.12169076215     Delta-E=       -0.068264550375 Rises=F Damp=F
 DIIS: error= 3.54D-03 at cycle   5 NSaved=   5.
 NSaved= 5 IEnMin= 5 EnMin= -3263.12169076215     IErMin= 5 ErrMin= 3.54D-03
 ErrMax= 3.54D-03  0.00D+00 EMaxC= 1.00D-01 BMatC= 1.03D-02 BMatP= 3.42D-01
 IDIUse=3 WtCom= 9.65D-01 WtEn= 3.54D-02
 Coeff-Com: -0.112D-01 0.298D-01 0.150D+00 0.253D+00 0.579D+00
 Coeff-En:   0.000D+00 0.000D+00 0.000D+00 0.000D+00 0.100D+01
 Coeff:     -0.108D-01 0.288D-01 0.145D+00 0.244D+00 0.593D+00
 Gap=     0.109 Goal=   None    Shift=    0.000
 Gap=     0.134 Goal=   None    Shift=    0.000
 RMSDP=2.93D-04 MaxDP=1.36D-02 DE=-6.83D-02 OVMax= 1.63D-02

 Cycle   6  Pass 1  IDiag  1:
 RMSU=  9.49D-05    CP:  1.01D+00  6.63D-01  6.37D-01  5.47D-01  6.22D-01
 E= -3263.12367617985     Delta-E=       -0.001985417698 Rises=F Damp=F
 DIIS: error= 1.42D-03 at cycle   6 NSaved=   6.
 NSaved= 6 IEnMin= 6 EnMin= -3263.12367617985     IErMin= 6 ErrMin= 1.42D-03
 ErrMax= 1.42D-03  0.00D+00 EMaxC= 1.00D-01 BMatC= 1.18D-03 BMatP= 1.03D-02
 IDIUse=3 WtCom= 9.86D-01 WtEn= 1.42D-02
 Coeff-Com:  0.471D-02-0.103D-01 0.135D-01 0.643D-01 0.340D+00 0.588D+00
 Coeff-En:   0.000D+00 0.000D+00 0.000D+00 0.000D+00 0.221D-01 0.978D+00
 Coeff:      0.464D-02-0.102D-01 0.133D-01 0.634D-01 0.336D+00 0.593D+00
 Gap=     0.111 Goal=   None    Shift=    0.000
 Gap=     0.132 Goal=   None    Shift=    0.000
 RMSDP=7.49D-05 MaxDP=3.33D-03 DE=-1.99D-03 OVMax= 9.07D-03

 Cycle   7  Pass 1  IDiag  1:
 RMSU=  3.77D-05    CP:  1.01D+00  6.53D-01  6.47D-01  5.58D-01  7.15D-01
                    CP:  5.93D-01
 E= -3263.12395521711     Delta-E=       -0.000279037264 Rises=F Damp=F
 DIIS: error= 5.52D-04 at cycle   7 NSaved=   7.
 NSaved= 7 IEnMin= 7 EnMin= -3263.12395521711     IErMin= 7 ErrMin= 5.52D-04
 ErrMax= 5.52D-04  0.00D+00 EMaxC= 1.00D-01 BMatC= 1.44D-04 BMatP= 1.18D-03
 IDIUse=3 WtCom= 9.94D-01 WtEn= 5.52D-03
 Coeff-Com:  0.273D-02-0.640D-02-0.668D-02 0.467D-02 0.117D+00 0.308D+00
 Coeff-Com:  0.581D+00
 Coeff-En:   0.000D+00 0.000D+00 0.000D+00 0.000D+00 0.000D+00 0.000D+00
 Coeff-En:   0.100D+01
 Coeff:      0.272D-02-0.636D-02-0.665D-02 0.464D-02 0.116D+00 0.307D+00
 Coeff:      0.583D+00
 Gap=     0.111 Goal=   None    Shift=    0.000
 Gap=     0.133 Goal=   None    Shift=    0.000
 RMSDP=2.21D-05 MaxDP=9.90D-04 DE=-2.79D-04 OVMax= 3.48D-03

 Cycle   8  Pass 1  IDiag  1:
 RMSU=  1.77D-05    CP:  1.01D+00  6.54D-01  6.46D-01  5.57D-01  7.18D-01
                    CP:  7.15D-01  8.76D-01
 E= -3263.12400790368     Delta-E=       -0.000052686562 Rises=F Damp=F
 DIIS: error= 3.22D-04 at cycle   8 NSaved=   8.
 NSaved= 8 IEnMin= 8 EnMin= -3263.12400790368     IErMin= 8 ErrMin= 3.22D-04
 ErrMax= 3.22D-04  0.00D+00 EMaxC= 1.00D-01 BMatC= 3.41D-05 BMatP= 1.44D-04
 IDIUse=3 WtCom= 9.97D-01 WtEn= 3.22D-03
 Coeff-Com:  0.166D-03-0.554D-03-0.570D-02-0.149D-01-0.250D-01-0.813D-02
 Coeff-Com:  0.282D+00 0.772D+00
 Coeff-En:   0.000D+00 0.000D+00 0.000D+00 0.000D+00 0.000D+00 0.000D+00
 Coeff-En:   0.000D+00 0.100D+01
 Coeff:      0.165D-03-0.552D-03-0.569D-02-0.148D-01-0.250D-01-0.810D-02
 Coeff:      0.281D+00 0.773D+00
 Gap=     0.112 Goal=   None    Shift=    0.000
 Gap=     0.133 Goal=   None    Shift=    0.000
 RMSDP=1.84D-05 MaxDP=6.18D-04 DE=-5.27D-05 OVMax= 2.57D-03

 Cycle   9  Pass 1  IDiag  1:
 RMSU=  9.10D-06    CP:  1.01D+00  6.51D-01  6.49D-01  5.55D-01  7.37D-01
                    CP:  7.24D-01  1.12D+00  1.19D+00
 E= -3263.12403042356     Delta-E=       -0.000022519888 Rises=F Damp=F
 DIIS: error= 1.56D-04 at cycle   9 NSaved=   9.
 NSaved= 9 IEnMin= 9 EnMin= -3263.12403042356     IErMin= 9 ErrMin= 1.56D-04
 ErrMax= 1.56D-04  0.00D+00 EMaxC= 1.00D-01 BMatC= 8.70D-06 BMatP= 3.41D-05
 IDIUse=3 WtCom= 9.98D-01 WtEn= 1.56D-03
 Coeff-Com: -0.443D-03 0.101D-02-0.730D-03-0.910D-02-0.551D-01-0.123D+00
 Coeff-Com: -0.972D-01 0.313D+00 0.972D+00
 Coeff-En:   0.000D+00 0.000D+00 0.000D+00 0.000D+00 0.000D+00 0.000D+00
 Coeff-En:   0.000D+00 0.000D+00 0.100D+01
 Coeff:     -0.443D-03 0.101D-02-0.729D-03-0.908D-02-0.550D-01-0.123D+00
 Coeff:     -0.970D-01 0.312D+00 0.972D+00
 Gap=     0.112 Goal=   None    Shift=    0.000
 Gap=     0.133 Goal=   None    Shift=    0.000
 RMSDP=1.35D-05 MaxDP=4.99D-04 DE=-2.25D-05 OVMax= 2.40D-03

 Cycle  10  Pass 1  IDiag  1:
 RMSU=  5.45D-06    CP:  1.01D+00  6.50D-01  6.51D-01  5.54D-01  7.43D-01
                    CP:  7.51D-01  1.34D+00  1.58D+00  1.21D+00
 E= -3263.12404109559     Delta-E=       -0.000010672031 Rises=F Damp=F
 DIIS: error= 7.58D-05 at cycle  10 NSaved=  10.
 NSaved=10 IEnMin=10 EnMin= -3263.12404109559     IErMin=10 ErrMin= 7.58D-05
 ErrMax= 7.58D-05  0.00D+00 EMaxC= 1.00D-01 BMatC= 3.96D-06 BMatP= 8.70D-06
 IDIUse=1 WtCom= 1.00D+00 WtEn= 0.00D+00
 Coeff-Com: -0.566D-03 0.126D-02 0.158D-02-0.177D-02-0.334D-01-0.831D-01
 Coeff-Com: -0.147D+00-0.170D-01 0.606D+00 0.675D+00
 Coeff:     -0.566D-03 0.126D-02 0.158D-02-0.177D-02-0.334D-01-0.831D-01
 Coeff:     -0.147D+00-0.170D-01 0.606D+00 0.675D+00
 Gap=     0.112 Goal=   None    Shift=    0.000
 Gap=     0.133 Goal=   None    Shift=    0.000
 RMSDP=8.01D-06 MaxDP=2.89D-04 DE=-1.07D-05 OVMax= 1.27D-03

 Cycle  11  Pass 1  IDiag  1:
 RMSU=  2.55D-06    CP:  1.01D+00  6.49D-01  6.52D-01  5.55D-01  7.47D-01
                    CP:  7.56D-01  1.44D+00  1.76D+00  1.60D+00  9.78D-01
 E= -3263.12404377727     Delta-E=       -0.000002681676 Rises=F Damp=F
 DIIS: error= 3.18D-05 at cycle  11 NSaved=  11.
 NSaved=11 IEnMin=11 EnMin= -3263.12404377727     IErMin=11 ErrMin= 3.18D-05
 ErrMax= 3.18D-05  0.00D+00 EMaxC= 1.00D-01 BMatC= 5.82D-07 BMatP= 3.96D-06
 IDIUse=1 WtCom= 1.00D+00 WtEn= 0.00D+00
 Coeff-Com: -0.191D-03 0.413D-03 0.604D-03 0.681D-03-0.453D-02-0.105D-01
 Coeff-Com: -0.445D-01-0.544D-01 0.820D-01 0.297D+00 0.734D+00
 Coeff:     -0.191D-03 0.413D-03 0.604D-03 0.681D-03-0.453D-02-0.105D-01
 Coeff:     -0.445D-01-0.544D-01 0.820D-01 0.297D+00 0.734D+00
 Gap=     0.112 Goal=   None    Shift=    0.000
 Gap=     0.133 Goal=   None    Shift=    0.000
 RMSDP=2.51D-06 MaxDP=1.07D-04 DE=-2.68D-06 OVMax= 4.69D-04

 Cycle  12  Pass 1  IDiag  1:
 RMSU=  1.45D-06    CP:  1.01D+00  6.50D-01  6.52D-01  5.55D-01  7.47D-01
                    CP:  7.62D-01  1.45D+00  1.81D+00  1.65D+00  1.17D+00
                    CP:  8.50D-01
 E= -3263.12404415854     Delta-E=       -0.000000381274 Rises=F Damp=F
 DIIS: error= 2.54D-05 at cycle  12 NSaved=  12.
 NSaved=12 IEnMin=12 EnMin= -3263.12404415854     IErMin=12 ErrMin= 2.54D-05
 ErrMax= 2.54D-05  0.00D+00 EMaxC= 1.00D-01 BMatC= 2.11D-07 BMatP= 5.82D-07
 IDIUse=1 WtCom= 1.00D+00 WtEn= 0.00D+00
 Coeff-Com:  0.779D-04-0.160D-03-0.123D-03 0.103D-02 0.790D-02 0.191D-01
 Coeff-Com:  0.151D-01-0.310D-01-0.132D+00-0.305D-01 0.440D+00 0.710D+00
 Coeff:      0.779D-04-0.160D-03-0.123D-03 0.103D-02 0.790D-02 0.191D-01
 Coeff:      0.151D-01-0.310D-01-0.132D+00-0.305D-01 0.440D+00 0.710D+00
 Gap=     0.112 Goal=   None    Shift=    0.000
 Gap=     0.133 Goal=   None    Shift=    0.000
 RMSDP=1.28D-06 MaxDP=5.52D-05 DE=-3.81D-07 OVMax= 2.49D-04

 Cycle  13  Pass 1  IDiag  1:
 RMSU=  6.05D-07    CP:  1.01D+00  6.50D-01  6.52D-01  5.55D-01  7.47D-01
                    CP:  7.65D-01  1.46D+00  1.84D+00  1.70D+00  1.23D+00
                    CP:  1.15D+00  1.11D+00
 E= -3263.12404429759     Delta-E=       -0.000000139041 Rises=F Damp=F
 DIIS: error= 1.13D-05 at cycle  13 NSaved=  13.
 NSaved=13 IEnMin=13 EnMin= -3263.12404429759     IErMin=13 ErrMin= 1.13D-05
 ErrMax= 1.13D-05  0.00D+00 EMaxC= 1.00D-01 BMatC= 3.28D-08 BMatP= 2.11D-07
 IDIUse=1 WtCom= 1.00D+00 WtEn= 0.00D+00
 Coeff-Com:  0.882D-04-0.189D-03-0.155D-03 0.229D-03 0.427D-02 0.937D-02
 Coeff-Com:  0.191D-01 0.358D-02-0.766D-01-0.931D-01-0.441D-02 0.230D+00
 Coeff-Com:  0.908D+00
 Coeff:      0.882D-04-0.189D-03-0.155D-03 0.229D-03 0.427D-02 0.937D-02
 Coeff:      0.191D-01 0.358D-02-0.766D-01-0.931D-01-0.441D-02 0.230D+00
 Coeff:      0.908D+00
 Gap=     0.112 Goal=   None    Shift=    0.000
 Gap=     0.133 Goal=   None    Shift=    0.000
 RMSDP=7.36D-07 MaxDP=3.23D-05 DE=-1.39D-07 OVMax= 1.24D-04

 Cycle  14  Pass 1  IDiag  1:
 RMSU=  2.99D-07    CP:  1.01D+00  6.50D-01  6.52D-01  5.55D-01  7.47D-01
                    CP:  7.65D-01  1.46D+00  1.84D+00  1.73D+00  1.28D+00
                    CP:  1.26D+00  1.36D+00  1.04D+00
 E= -3263.12404432541     Delta-E=       -0.000000027820 Rises=F Damp=F
 DIIS: error= 6.57D-06 at cycle  14 NSaved=  14.
 NSaved=14 IEnMin=14 EnMin= -3263.12404432541     IErMin=14 ErrMin= 6.57D-06
 ErrMax= 6.57D-06  0.00D+00 EMaxC= 1.00D-01 BMatC= 1.47D-08 BMatP= 3.28D-08
 IDIUse=1 WtCom= 1.00D+00 WtEn= 0.00D+00
 Coeff-Com:  0.320D-04-0.725D-04-0.562D-04-0.661D-04 0.109D-02 0.204D-02
 Coeff-Com:  0.978D-02 0.104D-01-0.248D-01-0.587D-01-0.909D-01 0.222D-02
 Coeff-Com:  0.562D+00 0.588D+00
 Coeff:      0.320D-04-0.725D-04-0.562D-04-0.661D-04 0.109D-02 0.204D-02
 Coeff:      0.978D-02 0.104D-01-0.248D-01-0.587D-01-0.909D-01 0.222D-02
 Coeff:      0.562D+00 0.588D+00
 Gap=     0.112 Goal=   None    Shift=    0.000
 Gap=     0.133 Goal=   None    Shift=    0.000
 RMSDP=2.68D-07 MaxDP=1.18D-05 DE=-2.78D-08 OVMax= 4.92D-05

 Cycle  15  Pass 1  IDiag  1:
 RMSU=  9.89D-08    CP:  1.01D+00  6.50D-01  6.52D-01  5.55D-01  7.47D-01
                    CP:  7.65D-01  1.47D+00  1.85D+00  1.73D+00  1.29D+00
                    CP:  1.30D+00  1.41D+00  1.28D+00  8.86D-01
 E= -3263.12404433097     Delta-E=       -0.000000005563 Rises=F Damp=F
 DIIS: error= 1.17D-06 at cycle  15 NSaved=  15.
 NSaved=15 IEnMin=15 EnMin= -3263.12404433097     IErMin=15 ErrMin= 1.17D-06
 ErrMax= 1.17D-06  0.00D+00 EMaxC= 1.00D-01 BMatC= 8.40D-10 BMatP= 1.47D-08
 IDIUse=1 WtCom= 1.00D+00 WtEn= 0.00D+00
 Coeff-Com: -0.616D-05 0.131D-04 0.696D-07-0.418D-04-0.332D-03-0.770D-03
 Coeff-Com: -0.840D-03 0.248D-02 0.528D-02-0.263D-02-0.235D-01-0.252D-01
 Coeff-Com:  0.127D-01 0.123D+00 0.910D+00
 Coeff:     -0.616D-05 0.131D-04 0.696D-07-0.418D-04-0.332D-03-0.770D-03
 Coeff:     -0.840D-03 0.248D-02 0.528D-02-0.263D-02-0.235D-01-0.252D-01
 Coeff:      0.127D-01 0.123D+00 0.910D+00
 Gap=     0.112 Goal=   None    Shift=    0.000
 Gap=     0.133 Goal=   None    Shift=    0.000
 RMSDP=8.90D-08 MaxDP=3.53D-06 DE=-5.56D-09 OVMax= 1.62D-05

 Cycle  16  Pass 1  IDiag  1:
 RMSU=  4.78D-08    CP:  1.01D+00  6.50D-01  6.52D-01  5.55D-01  7.47D-01
                    CP:  7.65D-01  1.47D+00  1.85D+00  1.73D+00  1.29D+00
                    CP:  1.30D+00  1.44D+00  1.30D+00  9.77D-01  1.25D+00
 E= -3263.12404433137     Delta-E=       -0.000000000406 Rises=F Damp=F
 DIIS: error= 5.04D-07 at cycle  16 NSaved=  16.
 NSaved=16 IEnMin=16 EnMin= -3263.12404433137     IErMin=16 ErrMin= 5.04D-07
 ErrMax= 5.04D-07  0.00D+00 EMaxC= 1.00D-01 BMatC= 2.41D-10 BMatP= 8.40D-10
 IDIUse=1 WtCom= 1.00D+00 WtEn= 0.00D+00
 Coeff-Com: -0.664D-05 0.146D-04 0.555D-05-0.889D-05-0.317D-03-0.618D-03
 Coeff-Com: -0.173D-02-0.314D-04 0.569D-02 0.657D-02-0.490D-03-0.137D-01
 Coeff-Com: -0.624D-01-0.113D-01 0.397D+00 0.681D+00
 Coeff:     -0.664D-05 0.146D-04 0.555D-05-0.889D-05-0.317D-03-0.618D-03
 Coeff:     -0.173D-02-0.314D-04 0.569D-02 0.657D-02-0.490D-03-0.137D-01
 Coeff:     -0.624D-01-0.113D-01 0.397D+00 0.681D+00
 Gap=     0.112 Goal=   None    Shift=    0.000
 Gap=     0.133 Goal=   None    Shift=    0.000
 RMSDP=4.23D-08 MaxDP=1.63D-06 DE=-4.06D-10 OVMax= 7.05D-06

 Cycle  17  Pass 1  IDiag  1:
 RMSU=  2.22D-08    CP:  1.01D+00  6.50D-01  6.52D-01  5.55D-01  7.47D-01
                    CP:  7.65D-01  1.47D+00  1.85D+00  1.73D+00  1.29D+00
                    CP:  1.30D+00  1.44D+00  1.31D+00  1.01D+00  1.44D+00
                    CP:  1.03D+00
 E= -3263.12404433148     Delta-E=       -0.000000000110 Rises=F Damp=F
 DIIS: error= 2.37D-07 at cycle  17 NSaved=  17.
 NSaved=17 IEnMin=17 EnMin= -3263.12404433148     IErMin=17 ErrMin= 2.37D-07
 ErrMax= 2.37D-07  0.00D+00 EMaxC= 1.00D-01 BMatC= 6.70D-11 BMatP= 2.41D-10
 IDIUse=1 WtCom= 1.00D+00 WtEn= 0.00D+00
 Coeff-Com: -0.214D-05 0.476D-05 0.437D-05 0.103D-04-0.886D-04-0.110D-03
 Coeff-Com: -0.775D-03-0.806D-03 0.163D-02 0.489D-02 0.738D-02-0.344D-03
 Coeff-Com: -0.402D-01-0.437D-01-0.703D-01 0.384D+00 0.759D+00
 Coeff:     -0.214D-05 0.476D-05 0.437D-05 0.103D-04-0.886D-04-0.110D-03
 Coeff:     -0.775D-03-0.806D-03 0.163D-02 0.489D-02 0.738D-02-0.344D-03
 Coeff:     -0.402D-01-0.437D-01-0.703D-01 0.384D+00 0.759D+00
 Gap=     0.112 Goal=   None    Shift=    0.000
 Gap=     0.133 Goal=   None    Shift=    0.000
 RMSDP=2.69D-08 MaxDP=1.28D-06 DE=-1.10D-10 OVMax= 7.20D-06

 Cycle  18  Pass 1  IDiag  1:
 RMSU=  1.09D-08    CP:  1.01D+00  6.50D-01  6.52D-01  5.55D-01  7.47D-01
                    CP:  7.66D-01  1.47D+00  1.85D+00  1.73D+00  1.29D+00
                    CP:  1.30D+00  1.44D+00  1.32D+00  1.04D+00  1.52D+00
                    CP:  1.34D+00  1.14D+00
 E= -3263.12404433152     Delta-E=       -0.000000000034 Rises=F Damp=F
 DIIS: error= 1.42D-07 at cycle  18 NSaved=  18.
 NSaved=18 IEnMin=18 EnMin= -3263.12404433152     IErMin=18 ErrMin= 1.42D-07
 ErrMax= 1.42D-07  0.00D+00 EMaxC= 1.00D-01 BMatC= 8.68D-12 BMatP= 6.70D-11
 IDIUse=1 WtCom= 1.00D+00 WtEn= 0.00D+00
 Coeff-Com:  0.686D-06-0.145D-05 0.104D-05 0.333D-05 0.441D-04 0.911D-04
 Coeff-Com:  0.159D-03-0.167D-03-0.625D-03-0.503D-03 0.136D-02 0.260D-02
 Coeff-Com:  0.464D-02-0.716D-02-0.944D-01-0.526D-01 0.173D+00 0.974D+00
 Coeff:      0.686D-06-0.145D-05 0.104D-05 0.333D-05 0.441D-04 0.911D-04
 Coeff:      0.159D-03-0.167D-03-0.625D-03-0.503D-03 0.136D-02 0.260D-02
 Coeff:      0.464D-02-0.716D-02-0.944D-01-0.526D-01 0.173D+00 0.974D+00
 Gap=     0.112 Goal=   None    Shift=    0.000
 Gap=     0.133 Goal=   None    Shift=    0.000
 RMSDP=1.28D-08 MaxDP=6.93D-07 DE=-3.37D-11 OVMax= 3.14D-06

 Cycle  19  Pass 1  IDiag  1:
 RMSU=  5.64D-09    CP:  1.01D+00  6.50D-01  6.52D-01  5.55D-01  7.47D-01
                    CP:  7.66D-01  1.47D+00  1.85D+00  1.73D+00  1.29D+00
                    CP:  1.30D+00  1.44D+00  1.32D+00  1.04D+00  1.57D+00
                    CP:  1.47D+00  1.44D+00  1.16D+00
 E= -3263.12404433159     Delta-E=       -0.000000000069 Rises=F Damp=F
 DIIS: error= 6.94D-08 at cycle  19 NSaved=  19.
 NSaved=19 IEnMin=19 EnMin= -3263.12404433159     IErMin=19 ErrMin= 6.94D-08
 ErrMax= 6.94D-08  0.00D+00 EMaxC= 1.00D-01 BMatC= 4.79D-12 BMatP= 8.68D-12
 IDIUse=1 WtCom= 1.00D+00 WtEn= 0.00D+00
 Coeff-Com:  0.104D-05-0.224D-05-0.355D-06 0.259D-06 0.514D-04 0.913D-04
 Coeff-Com:  0.272D-03 0.572D-04-0.756D-03-0.139D-02-0.600D-03 0.181D-02
 Coeff-Com:  0.115D-01 0.436D-02-0.494D-01-0.112D+00-0.411D-01 0.617D+00
 Coeff-Com:  0.570D+00
 Coeff:      0.104D-05-0.224D-05-0.355D-06 0.259D-06 0.514D-04 0.913D-04
 Coeff:      0.272D-03 0.572D-04-0.756D-03-0.139D-02-0.600D-03 0.181D-02
 Coeff:      0.115D-01 0.436D-02-0.494D-01-0.112D+00-0.411D-01 0.617D+00
 Coeff:      0.570D+00
 Gap=     0.112 Goal=   None    Shift=    0.000
 Gap=     0.133 Goal=   None    Shift=    0.000
 RMSDP=5.06D-09 MaxDP=2.56D-07 DE=-6.91D-11 OVMax= 1.55D-06

 Error on total polarization charges =  0.01434
 SCF Done:  E(UB3LYP) =  -3263.12404433     A.U. after   19 cycles
            NFock= 19  Conv=0.51D-08     -V/T= 2.0017
 <Sx>= 0.0000 <Sy>= 0.0000 <Sz>= 0.5000 <S**2>= 0.7729 S= 0.5114
 <L.S>= 0.000000000000E+00
 KE= 3.257438342078D+03 PE=-1.054437451555D+04 EE= 2.630788678045D+03
 Annihilation of the first spin contaminant:
 S**2 before annihilation     0.7729,   after     0.7504
 Leave Link  502 at Fri Jan 10 10:21:11 2020, MaxMem=   134217728 cpu:      1529.0
 (Enter E:\Gaussian\G09W\l801.exe)
 DoSCS=F DFT=T ScalE2(SS,OS)=  1.000000  1.000000
 ExpMin= 1.03D-01 ExpMax= 4.40D+05 ExpMxC= 1.51D+04 IAcc=3 IRadAn=         5 AccDes= 0.00D+00
 HarFok:  IExCor=  205 AccDes= 0.00D+00 IRadAn=         5 IDoV=-2 UseB2=F ITyADJ=14
 ICtDFT= 12500011 ScaDFX=  1.000000  1.000000  1.000000  1.000000
 Largest valence mixing into a core orbital is  2.26D-04
 Largest core mixing into a valence orbital is  1.86D-05
 Largest valence mixing into a core orbital is  2.26D-04
 Largest core mixing into a valence orbital is  1.99D-05
 Range of M.O.s used for correlation:    31   356
 NBasis=   356 NAE=    72 NBE=    71 NFC=    30 NFV=     0
 NROrb=    326 NOA=    42 NOB=    41 NVA=   284 NVB=   285

 **** Warning!!: The largest alpha MO coefficient is  0.23307463D+02


 **** Warning!!: The largest beta MO coefficient is  0.23509253D+02

 Leave Link  801 at Fri Jan 10 10:21:13 2020, MaxMem=   134217728 cpu:         2.0
 (Enter E:\Gaussian\G09W\l914.exe)
 UHF ground state
 MDV=   134217728 DFT=T DoStab=F Mixed=T DoRPA=T DoScal=F NonHer=T
 NEqPCM:  Using equilibrium solvation (IEInf=0, Eps=  35.6880, EpsInf=   1.8069)
 Making orbital integer symmetry assigments:
 Orbital symmetries:
 Alpha Orbitals:
       Occupied  (A) (A) (A) (A) (A) (A) (A) (A) (A) (A) (A) (A)
                 (A) (A) (A) (A) (A) (A) (A) (A) (A) (A) (A) (A)
                 (A) (A) (A) (A) (A) (A) (A) (A) (A) (A) (A) (A)
                 (A) (A) (A) (A) (A) (A) (A) (A) (A) (A) (A) (A)
                 (A) (A) (A) (A) (A) (A) (A) (A) (A) (A) (A) (A)
                 (A) (A) (A) (A) (A) (A) (A) (A) (A) (A) (A) (A)
       Virtual   (A) (A) (A) (A) (A) (A) (A) (A) (A) (A) (A) (A)
                 (A) (A) (A) (A) (A) (A) (A) (A) (A) (A) (A) (A)
                 (A) (A) (A) (A) (A) (A) (A) (A) (A) (A) (A) (A)
                 (A) (A) (A) (A) (A) (A) (A) (A) (A) (A) (A) (A)
                 (A) (A) (A) (A) (A) (A) (A) (A) (A) (A) (A) (A)
                 (A) (A) (A) (A) (A) (A) (A) (A) (A) (A) (A) (A)
                 (A) (A) (A) (A) (A) (A) (A) (A) (A) (A) (A) (A)
                 (A) (A) (A) (A) (A) (A) (A) (A) (A) (A) (A) (A)
                 (A) (A) (A) (A) (A) (A) (A) (A) (A) (A) (A) (A)
                 (A) (A) (A) (A) (A) (A) (A) (A) (A) (A) (A) (A)
                 (A) (A) (A) (A) (A) (A) (A) (A) (A) (A) (A) (A)
                 (A) (A) (A) (A) (A) (A) (A) (A) (A) (A) (A) (A)
                 (A) (A) (A) (A) (A) (A) (A) (A) (A) (A) (A) (A)
                 (A) (A) (A) (A) (A) (A) (A) (A) (A) (A) (A) (A)
                 (A) (A) (A) (A) (A) (A) (A) (A) (A) (A) (A) (A)
                 (A) (A) (A) (A) (A) (A) (A) (A) (A) (A) (A) (A)
                 (A) (A) (A) (A) (A) (A) (A) (A) (A) (A) (A) (A)
                 (A) (A) (A) (A) (A) (A) (A) (A) (A) (A) (A) (A)
                 (A) (A) (A) (A) (A) (A) (A) (A) (A) (A) (A) (A)
                 (A) (A) (A) (A) (A) (A) (A) (A) (A) (A) (A) (A)
                 (A) (A) (A) (A) (A) (A) (A) (A) (A) (A) (A) (A)
                 (A) (A) (A) (A) (A) (A) (A) (A) (A) (A) (A) (A)
                 (A) (A) (A) (A) (A) (A) (A) (A) (A) (A) (A) (A)
                 (A) (A) (A) (A) (A) (A) (A) (A)
 Beta  Orbitals:
       Occupied  (A) (A) (A) (A) (A) (A) (A) (A) (A) (A) (A) (A)
                 (A) (A) (A) (A) (A) (A) (A) (A) (A) (A) (A) (A)
                 (A) (A) (A) (A) (A) (A) (A) (A) (A) (A) (A) (A)
                 (A) (A) (A) (A) (A) (A) (A) (A) (A) (A) (A) (A)
                 (A) (A) (A) (A) (A) (A) (A) (A) (A) (A) (A) (A)
                 (A) (A) (A) (A) (A) (A) (A) (A) (A) (A) (A)
       Virtual   (A) (A) (A) (A) (A) (A) (A) (A) (A) (A) (A) (A)
                 (A) (A) (A) (A) (A) (A) (A) (A) (A) (A) (A) (A)
                 (A) (A) (A) (A) (A) (A) (A) (A) (A) (A) (A) (A)
                 (A) (A) (A) (A) (A) (A) (A) (A) (A) (A) (A) (A)
                 (A) (A) (A) (A) (A) (A) (A) (A) (A) (A) (A) (A)
                 (A) (A) (A) (A) (A) (A) (A) (A) (A) (A) (A) (A)
                 (A) (A) (A) (A) (A) (A) (A) (A) (A) (A) (A) (A)
                 (A) (A) (A) (A) (A) (A) (A) (A) (A) (A) (A) (A)
                 (A) (A) (A) (A) (A) (A) (A) (A) (A) (A) (A) (A)
                 (A) (A) (A) (A) (A) (A) (A) (A) (A) (A) (A) (A)
                 (A) (A) (A) (A) (A) (A) (A) (A) (A) (A) (A) (A)
                 (A) (A) (A) (A) (A) (A) (A) (A) (A) (A) (A) (A)
                 (A) (A) (A) (A) (A) (A) (A) (A) (A) (A) (A) (A)
                 (A) (A) (A) (A) (A) (A) (A) (A) (A) (A) (A) (A)
                 (A) (A) (A) (A) (A) (A) (A) (A) (A) (A) (A) (A)
                 (A) (A) (A) (A) (A) (A) (A) (A) (A) (A) (A) (A)
                 (A) (A) (A) (A) (A) (A) (A) (A) (A) (A) (A) (A)
                 (A) (A) (A) (A) (A) (A) (A) (A) (A) (A) (A) (A)
                 (A) (A) (A) (A) (A) (A) (A) (A) (A) (A) (A) (A)
                 (A) (A) (A) (A) (A) (A) (A) (A) (A) (A) (A) (A)
                 (A) (A) (A) (A) (A) (A) (A) (A) (A) (A) (A) (A)
                 (A) (A) (A) (A) (A) (A) (A) (A) (A) (A) (A) (A)
                 (A) (A) (A) (A) (A) (A) (A) (A) (A) (A) (A) (A)
                 (A) (A) (A) (A) (A) (A) (A) (A) (A)
    12 initial guesses have been made.
 Convergence on wavefunction:    0.000001000000000
 Davidson Disk Diagonalization:  ConvIn= 1.00D-06 SkipCon=T Conv= 1.00D-06.
 Max sub-space:   200 roots to seek:    12 dimension of matrix:        23613
 Iteration     1 Dimension    12 NMult     0 NNew     12
 CISAX will form    12 AO SS matrices at one time.
 NMat=    12 NSing=    12 JSym2X= 0.
 FoFJK:  IHMeth= 1 ICntrl=       0 DoSepK=F KAlg= 0 I1Cent=   0 FoldK=F
 IRaf=         0 NMat=  24 IRICut=       1 DoRegI=T DoRafI=F ISym2E= 0.
 FoFCou: FMM=F IPFlag=           0 FMFlag=      100000 FMFlg1=           0
         NFxFlg=           0 DoJE=F BraDBF=F KetDBF=F FulRan=T
         wScrn=  0.000000 ICntrl=       0 IOpCl=  1 I1Cent=           0 NGrid=           0
         NMat0=   24 NMatS0=     12 NMatT0=    0 NMatD0=   24 NMtDS0=    0 NMtDT0=    0
 Symmetry not used in FoFCou.
 New state      2 was old state      3
 New state      3 was old state      2
 Excitation Energies [eV] at current iteration:
 Root      1 :     2.303850532576860
 Root      2 :     2.520727373230340
 Root      3 :     2.891884784106084
 Root      4 :     3.204321983372897
 Root      5 :     3.452459216706424
 Root      6 :     3.537208698456296
 Root      7 :     3.818735278592401
 Root      8 :     4.018222084600975
 Root      9 :     4.054695893401874
 Root     10 :     4.166181787501563
 Root     11 :     4.310344435996812
 Root     12 :     4.463346493375037
 Iteration     2 Dimension    18 NMult    12 NNew      6
 CISAX will form     6 AO SS matrices at one time.
 NMat=     6 NSing=     6 JSym2X= 0.
 Root      1 not converged, maximum delta is    0.077620398851182
 Root      2 not converged, maximum delta is    0.231975669135178
 Root      3 not converged, maximum delta is    0.084591847021997
 Excitation Energies [eV] at current iteration:
 Root      1 :     2.123401481750895   Change is   -0.180449050825965
 Root      2 :     2.325213116160847   Change is   -0.195514257069494
 Root      3 :     2.745100269659313   Change is   -0.146784514446771
 Iteration     3 Dimension    24 NMult    18 NNew      6
 CISAX will form     6 AO SS matrices at one time.
 NMat=     6 NSing=     6 JSym2X= 0.
 Root      1 not converged, maximum delta is    0.033342388249708
 Root      2 not converged, maximum delta is    0.014568790464652
 Root      3 not converged, maximum delta is    0.041581090359399
 Excitation Energies [eV] at current iteration:
 Root      1 :     2.097347609334531   Change is   -0.026053872416364
 Root      2 :     2.318537373264067   Change is   -0.006675742896780
 Root      3 :     2.702167092794783   Change is   -0.042933176864530
 Iteration     4 Dimension    30 NMult    24 NNew      6
 CISAX will form     6 AO SS matrices at one time.
 NMat=     6 NSing=     6 JSym2X= 0.
 Root      1 not converged, maximum delta is    0.019059857806782
 Root      2 not converged, maximum delta is    0.002364789810329
 Root      3 not converged, maximum delta is    0.037855975008390
 Excitation Energies [eV] at current iteration:
 Root      1 :     2.087235836582088   Change is   -0.010111772752443
 Root      2 :     2.318235006289971   Change is   -0.000302366974096
 Root      3 :     2.682216066201678   Change is   -0.019951026593105
 Iteration     5 Dimension    36 NMult    30 NNew      6
 CISAX will form     6 AO SS matrices at one time.
 NMat=     6 NSing=     6 JSym2X= 0.
 Root      1 not converged, maximum delta is    0.009652717018036
 Root      2 not converged, maximum delta is    0.000358183301197
 Root      3 not converged, maximum delta is    0.020190358849612
 Excitation Energies [eV] at current iteration:
 Root      1 :     2.084972261837799   Change is   -0.002263574744289
 Root      2 :     2.318220363464299   Change is   -0.000014642825672
 Root      3 :     2.675833914780492   Change is   -0.006382151421186
 Iteration     6 Dimension    42 NMult    36 NNew      6
 CISAX will form     6 AO SS matrices at one time.
 NMat=     6 NSing=     6 JSym2X= 0.
 Root      1 not converged, maximum delta is    0.005807411819379
 Root      2 not converged, maximum delta is    0.000080935155401
 Root      3 not converged, maximum delta is    0.012907395947090
 Excitation Energies [eV] at current iteration:
 Root      1 :     2.084070563983145   Change is   -0.000901697854654
 Root      2 :     2.318219591509784   Change is   -0.000000771954515
 Root      3 :     2.672936837880177   Change is   -0.002897076900315
 Iteration     7 Dimension    48 NMult    42 NNew      6
 CISAX will form     6 AO SS matrices at one time.
 NMat=     6 NSing=     6 JSym2X= 0.
 Root      1 not converged, maximum delta is    0.002602694242077
 Root      2 not converged, maximum delta is    0.000011344796679
 Root      3 not converged, maximum delta is    0.004517810326081
 Excitation Energies [eV] at current iteration:
 Root      1 :     2.083883655468159   Change is   -0.000186908514986
 Root      2 :     2.318219558688052   Change is   -0.000000032821732
 Root      3 :     2.672218948018669   Change is   -0.000717889861508
 Iteration     8 Dimension    54 NMult    48 NNew      6
 CISAX will form     6 AO SS matrices at one time.
 NMat=     6 NSing=     6 JSym2X= 0.
 Root      1 not converged, maximum delta is    0.001338584962738
 Root      2 not converged, maximum delta is    0.000006449774207
 Root      3 not converged, maximum delta is    0.002390446484552
 Excitation Energies [eV] at current iteration:
 Root      1 :     2.083839999628072   Change is   -0.000043655840087
 Root      2 :     2.318219555107506   Change is   -0.000000003580546
 Root      3 :     2.672112710612750   Change is   -0.000106237405919
 Iteration     9 Dimension    60 NMult    54 NNew      6
 CISAX will form     6 AO SS matrices at one time.
 NMat=     6 NSing=     6 JSym2X= 0.
 Root      1 not converged, maximum delta is    0.000416723833990
 Root      2 not converged, maximum delta is    0.000001359724762
 Root      3 not converged, maximum delta is    0.000667223584555
 Excitation Energies [eV] at current iteration:
 Root      1 :     2.083831786835594   Change is   -0.000008212792478
 Root      2 :     2.318219554694167   Change is   -0.000000000413339
 Root      3 :     2.672096963144516   Change is   -0.000015747468234
 Iteration    10 Dimension    66 NMult    60 NNew      6
 CISAX will form     6 AO SS matrices at one time.
 NMat=     6 NSing=     6 JSym2X= 0.
 Root      1 not converged, maximum delta is    0.000151851427939
 Root      2 has converged.
 Root      3 not converged, maximum delta is    0.000203641176216
 Excitation Energies [eV] at current iteration:
 Root      1 :     2.083830621933386   Change is   -0.000001164902208
 Root      2 :     2.318219554651826   Change is   -0.000000000042341
 Root      3 :     2.672094668855707   Change is   -0.000002294288809
 Iteration    11 Dimension    70 NMult    66 NNew      4
 CISAX will form     4 AO SS matrices at one time.
 NMat=     4 NSing=     4 JSym2X= 0.
 Root      1 not converged, maximum delta is    0.000040316407079
 Root      2 has converged.
 Root      3 not converged, maximum delta is    0.000079798750477
 Excitation Energies [eV] at current iteration:
 Root      1 :     2.083830464028126   Change is   -0.000000157905259
 Root      2 :     2.318219554651790   Change is   -0.000000000000035
 Root      3 :     2.672094383454101   Change is   -0.000000285401606
 Iteration    12 Dimension    74 NMult    70 NNew      4
 CISAX will form     4 AO SS matrices at one time.
 NMat=     4 NSing=     4 JSym2X= 0.
 Root      1 not converged, maximum delta is    0.000018339137818
 Root      2 has converged.
 Root      3 not converged, maximum delta is    0.000022528791121
 Excitation Energies [eV] at current iteration:
 Root      1 :     2.083830443974923   Change is   -0.000000020053203
 Root      2 :     2.318219554651720   Change is   -0.000000000000071
 Root      3 :     2.672094348404051   Change is   -0.000000035050050
 Iteration    13 Dimension    78 NMult    74 NNew      4
 CISAX will form     4 AO SS matrices at one time.
 NMat=     4 NSing=     4 JSym2X= 0.
 Root      1 not converged, maximum delta is    0.000006741572565
 Root      2 has converged.
 Root      3 not converged, maximum delta is    0.000007228154518
 Excitation Energies [eV] at current iteration:
 Root      1 :     2.083830441673794   Change is   -0.000000002301129
 Root      2 :     2.318219554651578   Change is   -0.000000000000142
 Root      3 :     2.672094343606619   Change is   -0.000000004797432
 Iteration    14 Dimension    82 NMult    78 NNew      4
 CISAX will form     4 AO SS matrices at one time.
 NMat=     4 NSing=     4 JSym2X= 0.
 Root      1 not converged, maximum delta is    0.000001728149088
 Root      2 has converged.
 Root      3 not converged, maximum delta is    0.000003262978266
 Excitation Energies [eV] at current iteration:
 Root      1 :     2.083830441480251   Change is   -0.000000000193543
 Root      2 :     2.318219554651436   Change is   -0.000000000000142
 Root      3 :     2.672094342974794   Change is   -0.000000000631825
 Iteration    15 Dimension    86 NMult    82 NNew      4
 CISAX will form     4 AO SS matrices at one time.
 NMat=     4 NSing=     4 JSym2X= 0.
 Root      1 has converged.
 Root      2 has converged.
 Root      3 has converged.
 Excitation Energies [eV] at current iteration:
 Root      1 :     2.083830441462104   Change is   -0.000000000018147
 Root      2 :     2.318219554651330   Change is   -0.000000000000106
 Root      3 :     2.672094342905326   Change is   -0.000000000069468
 Convergence achieved on expansion vectors.
 ***********************************************************************
 Excited states from <AA,BB:AA,BB> singles matrix:
 ***********************************************************************
 
 ExtSpn:  IState=     1 X2= 1.008 Y2= 0.008 X2-Y2-1=-1.11D-15
          S2Grnd=  0.773 Ra=  0.006 Rb=  0.008 T=  0.000 S2Ext=  0.014 S2=  0.787
 ExtSpn:  IState=     2 X2= 1.002 Y2= 0.002 X2-Y2-1=-5.55D-16
          S2Grnd=  0.773 Ra=  0.010 Rb=  0.128 T=  0.071 S2Ext=  0.208 S2=  0.981
 ExtSpn:  IState=     3 X2= 1.009 Y2= 0.009 X2-Y2-1=-1.22D-15
          S2Grnd=  0.773 Ra=  0.025 Rb=  0.037 T=  0.054 S2Ext=  0.115 S2=  0.888
 1PDM for each excited state written to RWF  633
 Ground to excited state transition densities written to RWF  633
 Ground to excited state transition electric dipole moments (Au):
       state          X           Y           Z        Dip. S.      Osc.
         1         0.0596     -0.6784      0.0000      0.4638      0.0237
         2         0.0000      0.0000     -0.0009      0.0000      0.0000
         3        -0.3575      0.2879      0.0000      0.2107      0.0138
 Ground to excited state transition velocity dipole moments (Au):
       state          X           Y           Z        Dip. S.      Osc.
         1        -0.0074      0.0627      0.0000      0.0040      0.0347
         2         0.0000      0.0000      0.0001      0.0000      0.0000
         3         0.0367     -0.0288      0.0000      0.0022      0.0148
 Ground to excited state transition magnetic dipole moments (Au):
       state          X           Y           Z
         1         0.0000      0.0000     -0.1771
         2         0.0751     -0.3511      0.0000
         3         0.0000      0.0000     -0.6076
 Ground to excited state transition velocity quadrupole moments (Au):
       state          XX          YY          ZZ          XY          XZ          YZ
         1         0.0051      0.0441      0.0015     -0.1911      0.0000      0.0000
         2         0.0000      0.0000      0.0000      0.0000      0.0079      0.0015
         3         0.1608     -0.1237      0.0052     -0.0636      0.0000      0.0000
 <0|del|b> * <b|rxdel|0> + <0|del|b> * <b|delr+rdel|0>
 Rotatory Strengths (R) in cgs (10**-40 erg-esu-cm/Gauss)
       state          XX          YY          ZZ    R(velocity)    E-M Angle
         1         0.0036     -0.0003      0.0026      0.0020       90.00
         2        -0.0008     -0.0003     -0.0011     -0.0007       90.00
         3        -0.0004     -0.0011      0.0006     -0.0003       90.00
 1/2[<0|r|b>*<b|rxdel|0> + (<0|rxdel|b>*<b|r|0>)*]
 Rotatory Strengths (R) in cgs (10**-40 erg-esu-cm/Gauss)
       state          XX          YY          ZZ     R(length)
         1        -0.0002      0.0049     -0.0001      0.0015
         2        -0.0006     -0.0011      0.0000     -0.0006
         3        -0.0004      0.0009     -0.0010     -0.0001
  1/2[<0|del|b>*<b|r|0> + (<0|r|b>*<b|del|0>)*] (Au)
       state          X           Y           Z        Dip. S.   Osc.(frdel)
         1        -0.0004     -0.0425      0.0000      0.0430      0.0286
         2         0.0000      0.0000      0.0000      0.0000      0.0000
         3        -0.0131     -0.0083      0.0000      0.0214      0.0143

 Excitation energies and oscillator strengths:
 
 Excited State   1:  2.037-A      2.0838 eV  594.98 nm  f=0.0237  <S**2>=0.787
     72A -> 73A        0.95681
     69B -> 72B       -0.18303
     71B -> 72B        0.17967
 This state for optimization and/or second-order correction.
 Total Energy, E(TD-HF/TD-KS) =  -3263.04746497    
 Copying the excited state density for this state as the 1-particle RhoCI density.
 
 Excited State   2:  2.219-A      2.3182 eV  534.83 nm  f=0.0000  <S**2>=0.981
     70B -> 72B        0.95791
     70B -> 73B        0.23957
     70B -> 79B       -0.11122
 
 Excited State   3:  2.134-A      2.6721 eV  464.00 nm  f=0.0138  <S**2>=0.888
     72A -> 74A        0.32586
     68B -> 72B        0.17787
     69B -> 72B        0.32319
     71B -> 72B        0.83224
 SavETr:  write IOETrn=   770 NScale= 10 NData=  16 NLR=1 NState=    3 LETran=      62.
 The state does not have a specific multiplicity.
 CISAX will form     1 AO SS matrices at one time.
 NMat=     1 NSing=     1 JSym2X= 0.
 GePol: Maximum number of non-zero 1st derivatives   =     349
 CISAX will form     1 AO SS matrices at one time.
 NMat=     1 NSing=     1 JSym2X= 0.
 Leave Link  914 at Fri Jan 10 11:44:13 2020, MaxMem=   134217728 cpu:      4979.0
 (Enter E:\Gaussian\G09W\l1002.exe)
 Minotr:  UHF open shell wavefunction.
          Computing CIS/TD-HF/TD-KS derivatives.
          Using Z-Vector for PSCF gradient.
          Skipping F1 and S1 gradient terms here.
          IDoAtm=1111111111111111111111111
 NEqPCM:  Using equilibrium solvation (IEInf=0, Eps=  35.6880, EpsInf=   1.8069)
          Frozen-core window.
          Direct CPHF calculation.
          Differentiating once with respect to electric field.
                with respect to dipole field.
          Differentiating once with respect to nuclear coordinates.
          Requested convergence is 1.0D-10 RMS, and 1.0D-09 maximum.
          NewPWx=F KeepS1=T KeepF1=T KeepIn=T MapXYZ=F SortEE=F KeepMc=T.
          MDV=     134217222 using IRadAn=       0.
 Using stored XC quadrature information.
          Solving linear equations separately, MaxMat=       0.
          There are     1 degrees of freedom in the 1st order CPHF.  IDoFFX=0 NUNeed=     1.
 FoFJK:  IHMeth= 1 ICntrl=       0 DoSepK=F KAlg= 0 I1Cent=   0 FoldK=F
 IRaf= 800000000 NMat=   1 IRICut=       1 DoRegI=T DoRafI=F ISym2E=-1.
 FoFCou: FMM=F IPFlag=           0 FMFlag=      100000 FMFlg1=           0
         NFxFlg=           0 DoJE=F BraDBF=F KetDBF=F FulRan=T
         wScrn=  0.000000 ICntrl=       0 IOpCl=  1 I1Cent=           0 NGrid=           0
         NMat0=    1 NMatS0=      1 NMatT0=    0 NMatD0=    1 NMtDS0=    0 NMtDT0=    0
 Petite list used in FoFCou.
 LinEq1:  Iter=  0 NonCon=     1 RMS=2.29D-03 Max=2.07D-01 NDo=     1
 AX will form     1 AO Fock derivatives at one time.
 LinEq1:  Iter=  1 NonCon=     1 RMS=1.86D-03 Max=1.49D-01 NDo=     1
 LinEq1:  Iter=  2 NonCon=     1 RMS=9.16D-04 Max=4.86D-02 NDo=     1
 LinEq1:  Iter=  3 NonCon=     1 RMS=6.88D-04 Max=3.45D-02 NDo=     1
 LinEq1:  Iter=  4 NonCon=     1 RMS=4.87D-04 Max=2.52D-02 NDo=     1
 LinEq1:  Iter=  5 NonCon=     1 RMS=3.09D-04 Max=1.50D-02 NDo=     1
 LinEq1:  Iter=  6 NonCon=     1 RMS=2.40D-04 Max=1.47D-02 NDo=     1
 LinEq1:  Iter=  7 NonCon=     1 RMS=1.66D-04 Max=1.07D-02 NDo=     1
 LinEq1:  Iter=  8 NonCon=     1 RMS=1.25D-04 Max=9.87D-03 NDo=     1
 LinEq1:  Iter=  9 NonCon=     1 RMS=6.89D-05 Max=2.81D-03 NDo=     1
 LinEq1:  Iter= 10 NonCon=     1 RMS=4.27D-05 Max=1.89D-03 NDo=     1
 LinEq1:  Iter= 11 NonCon=     1 RMS=2.55D-05 Max=1.02D-03 NDo=     1
 LinEq1:  Iter= 12 NonCon=     1 RMS=1.38D-05 Max=5.22D-04 NDo=     1
 LinEq1:  Iter= 13 NonCon=     1 RMS=9.04D-06 Max=3.84D-04 NDo=     1
 LinEq1:  Iter= 14 NonCon=     1 RMS=6.27D-06 Max=2.49D-04 NDo=     1
 LinEq1:  Iter= 15 NonCon=     1 RMS=3.68D-06 Max=1.48D-04 NDo=     1
 LinEq1:  Iter= 16 NonCon=     1 RMS=2.10D-06 Max=1.11D-04 NDo=     1
 LinEq1:  Iter= 17 NonCon=     1 RMS=1.68D-06 Max=7.80D-05 NDo=     1
 LinEq1:  Iter= 18 NonCon=     1 RMS=7.89D-07 Max=3.25D-05 NDo=     1
 LinEq1:  Iter= 19 NonCon=     1 RMS=5.02D-07 Max=2.27D-05 NDo=     1
 LinEq1:  Iter= 20 NonCon=     1 RMS=2.67D-07 Max=1.15D-05 NDo=     1
 LinEq1:  Iter= 21 NonCon=     1 RMS=1.68D-07 Max=6.33D-06 NDo=     1
 LinEq1:  Iter= 22 NonCon=     1 RMS=9.81D-08 Max=4.70D-06 NDo=     1
 LinEq1:  Iter= 23 NonCon=     1 RMS=4.77D-08 Max=2.16D-06 NDo=     1
 LinEq1:  Iter= 24 NonCon=     1 RMS=3.54D-08 Max=1.30D-06 NDo=     1
 LinEq1:  Iter= 25 NonCon=     1 RMS=1.53D-08 Max=5.85D-07 NDo=     1
 LinEq1:  Iter= 26 NonCon=     1 RMS=1.18D-08 Max=4.78D-07 NDo=     1
 LinEq1:  Iter= 27 NonCon=     1 RMS=5.00D-09 Max=1.84D-07 NDo=     1
 LinEq1:  Iter= 28 NonCon=     1 RMS=2.20D-09 Max=7.62D-08 NDo=     1
 LinEq1:  Iter= 29 NonCon=     1 RMS=1.41D-09 Max=4.03D-08 NDo=     1
 LinEq1:  Iter= 30 NonCon=     1 RMS=5.29D-10 Max=1.61D-08 NDo=     1
 LinEq1:  Iter= 31 NonCon=     1 RMS=1.86D-10 Max=7.18D-09 NDo=     1
 LinEq1:  Iter= 32 NonCon=     1 RMS=1.33D-10 Max=6.79D-09 NDo=     1
 LinEq1:  Iter= 33 NonCon=     1 RMS=4.84D-11 Max=1.52D-09 NDo=     1
 LinEq1:  Iter= 34 NonCon=     0 RMS=1.64D-11 Max=4.31D-10 NDo=     1
 Linear equations converged to 1.000D-10 1.000D-09 after    34 iterations.
 End of Minotr F.D. properties file   721 does not exist.
 End of Minotr F.D. properties file   722 does not exist.
 End of Minotr F.D. properties file   788 does not exist.
 Leave Link 1002 at Fri Jan 10 12:39:23 2020, MaxMem=   134217728 cpu:      3309.0
 (Enter E:\Gaussian\G09W\l601.exe)
 Copying SCF densities to generalized density rwf, IOpCl= 1 IROHF=0.

 **********************************************************************

            Population analysis using the SCF density.

 **********************************************************************

 Orbital symmetries:
 Alpha Orbitals:
       Occupied  (A) (A) (A) (A) (A) (A) (A) (A) (A) (A) (A) (A)
                 (A) (A) (A) (A) (A) (A) (A) (A) (A) (A) (A) (A)
                 (A) (A) (A) (A) (A) (A) (A) (A) (A) (A) (A) (A)
                 (A) (A) (A) (A) (A) (A) (A) (A) (A) (A) (A) (A)
                 (A) (A) (A) (A) (A) (A) (A) (A) (A) (A) (A) (A)
                 (A) (A) (A) (A) (A) (A) (A) (A) (A) (A) (A) (A)
       Virtual   (A) (A) (A) (A) (A) (A) (A) (A) (A) (A) (A) (A)
                 (A) (A) (A) (A) (A) (A) (A) (A) (A) (A) (A) (A)
                 (A) (A) (A) (A) (A) (A) (A) (A) (A) (A) (A) (A)
                 (A) (A) (A) (A) (A) (A) (A) (A) (A) (A) (A) (A)
                 (A) (A) (A) (A) (A) (A) (A) (A) (A) (A) (A) (A)
                 (A) (A) (A) (A) (A) (A) (A) (A) (A) (A) (A) (A)
                 (A) (A) (A) (A) (A) (A) (A) (A) (A) (A) (A) (A)
                 (A) (A) (A) (A) (A) (A) (A) (A) (A) (A) (A) (A)
                 (A) (A) (A) (A) (A) (A) (A) (A) (A) (A) (A) (A)
                 (A) (A) (A) (A) (A) (A) (A) (A) (A) (A) (A) (A)
                 (A) (A) (A) (A) (A) (A) (A) (A) (A) (A) (A) (A)
                 (A) (A) (A) (A) (A) (A) (A) (A) (A) (A) (A) (A)
                 (A) (A) (A) (A) (A) (A) (A) (A) (A) (A) (A) (A)
                 (A) (A) (A) (A) (A) (A) (A) (A) (A) (A) (A) (A)
                 (A) (A) (A) (A) (A) (A) (A) (A) (A) (A) (A) (A)
                 (A) (A) (A) (A) (A) (A) (A) (A) (A) (A) (A) (A)
                 (A) (A) (A) (A) (A) (A) (A) (A) (A) (A) (A) (A)
                 (A) (A) (A) (A) (A) (A) (A) (A) (A) (A) (A) (A)
                 (A) (A) (A) (A) (A) (A) (A) (A) (A) (A) (A) (A)
                 (A) (A) (A) (A) (A) (A) (A) (A) (A) (A) (A) (A)
                 (A) (A) (A) (A) (A) (A) (A) (A) (A) (A) (A) (A)
                 (A) (A) (A) (A) (A) (A) (A) (A) (A) (A) (A) (A)
                 (A) (A) (A) (A) (A) (A) (A) (A) (A) (A) (A) (A)
                 (A) (A) (A) (A) (A) (A) (A) (A)
 Beta  Orbitals:
       Occupied  (A) (A) (A) (A) (A) (A) (A) (A) (A) (A) (A) (A)
                 (A) (A) (A) (A) (A) (A) (A) (A) (A) (A) (A) (A)
                 (A) (A) (A) (A) (A) (A) (A) (A) (A) (A) (A) (A)
                 (A) (A) (A) (A) (A) (A) (A) (A) (A) (A) (A) (A)
                 (A) (A) (A) (A) (A) (A) (A) (A) (A) (A) (A) (A)
                 (A) (A) (A) (A) (A) (A) (A) (A) (A) (A) (A)
       Virtual   (A) (A) (A) (A) (A) (A) (A) (A) (A) (A) (A) (A)
                 (A) (A) (A) (A) (A) (A) (A) (A) (A) (A) (A) (A)
                 (A) (A) (A) (A) (A) (A) (A) (A) (A) (A) (A) (A)
                 (A) (A) (A) (A) (A) (A) (A) (A) (A) (A) (A) (A)
                 (A) (A) (A) (A) (A) (A) (A) (A) (A) (A) (A) (A)
                 (A) (A) (A) (A) (A) (A) (A) (A) (A) (A) (A) (A)
                 (A) (A) (A) (A) (A) (A) (A) (A) (A) (A) (A) (A)
                 (A) (A) (A) (A) (A) (A) (A) (A) (A) (A) (A) (A)
                 (A) (A) (A) (A) (A) (A) (A) (A) (A) (A) (A) (A)
                 (A) (A) (A) (A) (A) (A) (A) (A) (A) (A) (A) (A)
                 (A) (A) (A) (A) (A) (A) (A) (A) (A) (A) (A) (A)
                 (A) (A) (A) (A) (A) (A) (A) (A) (A) (A) (A) (A)
                 (A) (A) (A) (A) (A) (A) (A) (A) (A) (A) (A) (A)
                 (A) (A) (A) (A) (A) (A) (A) (A) (A) (A) (A) (A)
                 (A) (A) (A) (A) (A) (A) (A) (A) (A) (A) (A) (A)
                 (A) (A) (A) (A) (A) (A) (A) (A) (A) (A) (A) (A)
                 (A) (A) (A) (A) (A) (A) (A) (A) (A) (A) (A) (A)
                 (A) (A) (A) (A) (A) (A) (A) (A) (A) (A) (A) (A)
                 (A) (A) (A) (A) (A) (A) (A) (A) (A) (A) (A) (A)
                 (A) (A) (A) (A) (A) (A) (A) (A) (A) (A) (A) (A)
                 (A) (A) (A) (A) (A) (A) (A) (A) (A) (A) (A) (A)
                 (A) (A) (A) (A) (A) (A) (A) (A) (A) (A) (A) (A)
                 (A) (A) (A) (A) (A) (A) (A) (A) (A) (A) (A) (A)
                 (A) (A) (A) (A) (A) (A) (A) (A) (A)
 The electronic state is 2-A.
 Alpha  occ. eigenvalues -- -482.83984 -62.49283 -56.31314 -56.30934 -56.30916
 Alpha  occ. eigenvalues --  -19.18530 -19.10454 -10.27271 -10.25839 -10.24720
 Alpha  occ. eigenvalues --  -10.21129 -10.21115 -10.20143 -10.20021 -10.19996
 Alpha  occ. eigenvalues --  -10.19981 -10.19960 -10.19568 -10.19344 -10.19108
 Alpha  occ. eigenvalues --  -10.18986  -8.70252  -6.53385  -6.52117  -6.52073
 Alpha  occ. eigenvalues --   -2.64482  -2.64122  -2.64091  -2.63083  -2.63083
 Alpha  occ. eigenvalues --   -1.10562  -1.03944  -0.90275  -0.88426  -0.83841
 Alpha  occ. eigenvalues --   -0.80554  -0.78257  -0.77920  -0.75060  -0.71855
 Alpha  occ. eigenvalues --   -0.66410  -0.64858  -0.62467  -0.60977  -0.57582
 Alpha  occ. eigenvalues --   -0.56318  -0.53768  -0.49613  -0.48974  -0.48188
 Alpha  occ. eigenvalues --   -0.47351  -0.46506  -0.45978  -0.45328  -0.44211
 Alpha  occ. eigenvalues --   -0.43077  -0.42384  -0.40755  -0.40072  -0.39799
 Alpha  occ. eigenvalues --   -0.37689  -0.37597  -0.36698  -0.36224  -0.33137
 Alpha  occ. eigenvalues --   -0.30505  -0.30380  -0.28265  -0.27928  -0.26774
 Alpha  occ. eigenvalues --   -0.26338  -0.18969
 Alpha virt. eigenvalues --   -0.07760  -0.04258  -0.02389  -0.01615   0.02656
 Alpha virt. eigenvalues --    0.02658   0.04119   0.06119   0.07370   0.08768
 Alpha virt. eigenvalues --    0.10073   0.11525   0.12512   0.12591   0.15845
 Alpha virt. eigenvalues --    0.18290   0.19271   0.20734   0.21129   0.22556
 Alpha virt. eigenvalues --    0.24097   0.24601   0.25421   0.26771   0.27004
 Alpha virt. eigenvalues --    0.28219   0.28294   0.28686   0.29705   0.30560
 Alpha virt. eigenvalues --    0.31810   0.34725   0.34895   0.35422   0.36473
 Alpha virt. eigenvalues --    0.37129   0.37611   0.37787   0.38293   0.39380
 Alpha virt. eigenvalues --    0.40303   0.40710   0.40753   0.41310   0.41999
 Alpha virt. eigenvalues --    0.42984   0.43488   0.44432   0.44789   0.45050
 Alpha virt. eigenvalues --    0.45609   0.46014   0.46637   0.47795   0.48364
 Alpha virt. eigenvalues --    0.51557   0.52347   0.53691   0.53925   0.55449
 Alpha virt. eigenvalues --    0.56464   0.56542   0.58690   0.58942   0.59320
 Alpha virt. eigenvalues --    0.60173   0.60426   0.61253   0.61841   0.62784
 Alpha virt. eigenvalues --    0.63062   0.65108   0.65392   0.65922   0.67309
 Alpha virt. eigenvalues --    0.70947   0.71048   0.71756   0.72099   0.72215
 Alpha virt. eigenvalues --    0.74501   0.75518   0.76485   0.78532   0.79343
 Alpha virt. eigenvalues --    0.80498   0.81060   0.81659   0.83164   0.83568
 Alpha virt. eigenvalues --    0.84424   0.86829   0.87595   0.90282   0.91622
 Alpha virt. eigenvalues --    0.91861   0.93014   0.95700   0.97016   0.97644
 Alpha virt. eigenvalues --    0.98372   0.99123   0.99851   1.00761   1.03685
 Alpha virt. eigenvalues --    1.04439   1.09308   1.09469   1.09869   1.10384
 Alpha virt. eigenvalues --    1.11357   1.12511   1.14452   1.14873   1.15846
 Alpha virt. eigenvalues --    1.16269   1.19290   1.20061   1.22993   1.23429
 Alpha virt. eigenvalues --    1.25457   1.26793   1.27466   1.29230   1.30591
 Alpha virt. eigenvalues --    1.32879   1.39210   1.42234   1.44122   1.45169
 Alpha virt. eigenvalues --    1.46494   1.47484   1.47885   1.49334   1.52542
 Alpha virt. eigenvalues --    1.53672   1.56159   1.57313   1.57579   1.61064
 Alpha virt. eigenvalues --    1.65031   1.66761   1.67910   1.70195   1.72360
 Alpha virt. eigenvalues --    1.74863   1.77670   1.77883   1.78885   1.80925
 Alpha virt. eigenvalues --    1.82407   1.83833   1.84485   1.84487   1.85239
 Alpha virt. eigenvalues --    1.86711   1.87805   1.88762   1.88787   1.91057
 Alpha virt. eigenvalues --    1.91233   1.91781   1.92801   1.94752   1.95868
 Alpha virt. eigenvalues --    1.98052   2.01439   2.05897   2.08549   2.10575
 Alpha virt. eigenvalues --    2.15282   2.18589   2.18978   2.20354   2.24901
 Alpha virt. eigenvalues --    2.26454   2.27453   2.30662   2.32379   2.32925
 Alpha virt. eigenvalues --    2.34150   2.35521   2.35669   2.36910   2.40857
 Alpha virt. eigenvalues --    2.46969   2.47151   2.50371   2.51748   2.55443
 Alpha virt. eigenvalues --    2.57295   2.57351   2.58234   2.65069   2.66505
 Alpha virt. eigenvalues --    2.68804   2.72003   2.73623   2.75953   2.77037
 Alpha virt. eigenvalues --    2.79954   2.81405   2.81857   2.82233   2.87960
 Alpha virt. eigenvalues --    2.88346   2.93030   2.97759   2.98234   3.02348
 Alpha virt. eigenvalues --    3.03389   3.05015   3.07602   3.08577   3.13196
 Alpha virt. eigenvalues --    3.14131   3.17669   3.19302   3.21325   3.23725
 Alpha virt. eigenvalues --    3.26113   3.27216   3.27818   3.29414   3.30731
 Alpha virt. eigenvalues --    3.30869   3.32888   3.36968   3.37200   3.39206
 Alpha virt. eigenvalues --    3.44554   3.45212   3.49419   3.53250   3.53960
 Alpha virt. eigenvalues --    3.56111   3.67316   3.68495   3.74721   3.81799
 Alpha virt. eigenvalues --    3.92077   3.94690   4.11174   4.12468   4.12940
 Alpha virt. eigenvalues --    4.16211   4.20342   4.36306   4.38184   4.53876
 Alpha virt. eigenvalues --    4.75166   4.77562   4.78360   4.80080   4.88946
 Alpha virt. eigenvalues --    5.08702   5.13354   5.53785   5.68839   6.47382
 Alpha virt. eigenvalues --    7.45440   7.52838   7.62337  23.17065  23.36386
 Alpha virt. eigenvalues --   23.73078  23.75880  23.77051  23.86493  23.87906
 Alpha virt. eigenvalues --   23.90546  23.97761  24.00415  24.03495  24.04014
 Alpha virt. eigenvalues --   24.11250  24.12517  47.76523  49.87105  49.98282
 Alpha virt. eigenvalues --  289.65356 289.72663 289.844101020.51395
  Beta  occ. eigenvalues -- -482.83985 -62.49283 -56.31313 -56.30936 -56.30917
  Beta  occ. eigenvalues --  -19.18204 -19.09969 -10.26640 -10.25848 -10.24795
  Beta  occ. eigenvalues --  -10.21246 -10.21216 -10.19988 -10.19850 -10.19828
  Beta  occ. eigenvalues --  -10.19812 -10.19781 -10.19641 -10.19423 -10.19075
  Beta  occ. eigenvalues --  -10.18914  -8.70253  -6.53384  -6.52121  -6.52074
  Beta  occ. eigenvalues --   -2.64482  -2.64124  -2.64091  -2.63086  -2.63085
  Beta  occ. eigenvalues --   -1.09847  -1.03134  -0.90008  -0.88253  -0.83584
  Beta  occ. eigenvalues --   -0.80271  -0.77965  -0.77701  -0.74859  -0.71021
  Beta  occ. eigenvalues --   -0.66307  -0.64571  -0.62334  -0.60787  -0.57397
  Beta  occ. eigenvalues --   -0.56095  -0.53546  -0.49399  -0.48882  -0.47933
  Beta  occ. eigenvalues --   -0.47272  -0.45840  -0.45273  -0.44770  -0.44061
  Beta  occ. eigenvalues --   -0.42799  -0.40574  -0.40505  -0.39694  -0.39656
  Beta  occ. eigenvalues --   -0.37551  -0.36761  -0.36577  -0.36084  -0.32486
  Beta  occ. eigenvalues --   -0.30372  -0.29376  -0.27630  -0.26934  -0.26303
  Beta  occ. eigenvalues --   -0.25786
  Beta virt. eigenvalues --   -0.12450  -0.06728  -0.03370  -0.01970  -0.01668
  Beta virt. eigenvalues --    0.02801   0.04383   0.05192   0.06155   0.07407
  Beta virt. eigenvalues --    0.08807   0.10113   0.11598   0.12627   0.13126
  Beta virt. eigenvalues --    0.15962   0.18726   0.20243   0.20888   0.21541
  Beta virt. eigenvalues --    0.22720   0.24207   0.24729   0.25544   0.26807
  Beta virt. eigenvalues --    0.27102   0.28307   0.28405   0.28755   0.29954
  Beta virt. eigenvalues --    0.30737   0.31951   0.34948   0.35401   0.35625
  Beta virt. eigenvalues --    0.36768   0.37330   0.37761   0.37956   0.38495
  Beta virt. eigenvalues --    0.40014   0.40525   0.40834   0.41050   0.41459
  Beta virt. eigenvalues --    0.42160   0.43253   0.43651   0.44492   0.44985
  Beta virt. eigenvalues --    0.45222   0.45771   0.46109   0.46814   0.48258
  Beta virt. eigenvalues --    0.48600   0.51645   0.52660   0.53941   0.54407
  Beta virt. eigenvalues --    0.55487   0.56562   0.56739   0.58753   0.59273
  Beta virt. eigenvalues --    0.59345   0.60281   0.60593   0.61417   0.62009
  Beta virt. eigenvalues --    0.62846   0.63122   0.65179   0.65630   0.66157
  Beta virt. eigenvalues --    0.67406   0.71189   0.71192   0.71934   0.72276
  Beta virt. eigenvalues --    0.72480   0.74659   0.75593   0.76670   0.78629
  Beta virt. eigenvalues --    0.79443   0.80614   0.81141   0.81837   0.83630
  Beta virt. eigenvalues --    0.84145   0.84540   0.86984   0.87731   0.90351
  Beta virt. eigenvalues --    0.91738   0.92936   0.93652   0.95896   0.97337
  Beta virt. eigenvalues --    0.97790   0.98500   0.99203   1.00141   1.01008
  Beta virt. eigenvalues --    1.03778   1.04505   1.09718   1.09758   1.10409
  Beta virt. eigenvalues --    1.10514   1.11760   1.12653   1.14644   1.15637
  Beta virt. eigenvalues --    1.16310   1.16581   1.19580   1.20372   1.23103
  Beta virt. eigenvalues --    1.23795   1.25529   1.26988   1.27608   1.29357
  Beta virt. eigenvalues --    1.30742   1.33307   1.39284   1.42309   1.44284
  Beta virt. eigenvalues --    1.45314   1.46598   1.47608   1.48441   1.50203
  Beta virt. eigenvalues --    1.52675   1.54106   1.56443   1.57514   1.57978
  Beta virt. eigenvalues --    1.61511   1.65318   1.67214   1.68110   1.70373
  Beta virt. eigenvalues --    1.72612   1.75065   1.77979   1.78166   1.79012
  Beta virt. eigenvalues --    1.81291   1.82688   1.84264   1.84735   1.84949
  Beta virt. eigenvalues --    1.85607   1.86836   1.88034   1.89087   1.89125
  Beta virt. eigenvalues --    1.91361   1.91414   1.91951   1.93101   1.94837
  Beta virt. eigenvalues --    1.95973   1.98042   2.01958   2.06015   2.08664
  Beta virt. eigenvalues --    2.10697   2.15340   2.18813   2.19480   2.20606
  Beta virt. eigenvalues --    2.24963   2.26527   2.27545   2.30833   2.32736
  Beta virt. eigenvalues --    2.33278   2.34270   2.35685   2.36053   2.37071
  Beta virt. eigenvalues --    2.40943   2.47211   2.47730   2.50468   2.52036
  Beta virt. eigenvalues --    2.55529   2.57516   2.58066   2.58955   2.65419
  Beta virt. eigenvalues --    2.66616   2.69170   2.72115   2.74074   2.76861
  Beta virt. eigenvalues --    2.77102   2.80293   2.82192   2.82342   2.82395
  Beta virt. eigenvalues --    2.88256   2.89387   2.94175   2.98242   2.98310
  Beta virt. eigenvalues --    3.02913   3.03707   3.05601   3.07828   3.08999
  Beta virt. eigenvalues --    3.14292   3.14514   3.17867   3.19344   3.21562
  Beta virt. eigenvalues --    3.23863   3.26176   3.27314   3.27978   3.29505
  Beta virt. eigenvalues --    3.30794   3.32090   3.32952   3.37066   3.37366
  Beta virt. eigenvalues --    3.39402   3.44674   3.45397   3.49601   3.53480
  Beta virt. eigenvalues --    3.54112   3.56348   3.67476   3.68735   3.74905
  Beta virt. eigenvalues --    3.82047   3.92210   3.94868   4.11437   4.12683
  Beta virt. eigenvalues --    4.12935   4.16216   4.20336   4.36321   4.38530
  Beta virt. eigenvalues --    4.53876   4.75360   4.77697   4.79759   4.80532
  Beta virt. eigenvalues --    4.91003   5.09100   5.13626   5.54225   5.69226
  Beta virt. eigenvalues --    6.47379   7.45431   7.52836   7.62338  23.17155
  Beta virt. eigenvalues --   23.36447  23.73360  23.75935  23.77115  23.86540
  Beta virt. eigenvalues --   23.87964  23.90898  23.97803  24.00519  24.03548
  Beta virt. eigenvalues --   24.04060  24.11300  24.12569  47.76522  49.87426
  Beta virt. eigenvalues --   49.98769 289.65353 289.72663 289.844111020.51394
          Condensed to atoms (all electrons):
               1          2          3          4          5          6
     1  C    5.004472   0.491683  -0.038759  -0.040268  -0.048613   0.488002
     2  C    0.491683   5.138340   0.374522  -0.092577  -0.060503  -0.029862
     3  C   -0.038759   0.374522   5.541221   0.460142  -0.047648  -0.048175
     4  C   -0.040268  -0.092577   0.460142   5.437038   0.365932  -0.034520
     5  C   -0.048613  -0.060503  -0.047648   0.365932   5.119728   0.539044
     6  C    0.488002  -0.029862  -0.048175  -0.034520   0.539044   4.926968
     7  H    0.400474  -0.043989   0.007781  -0.000061   0.007291  -0.043508
     8  H   -0.040235   0.403133  -0.070666   0.005583  -0.001320   0.007165
     9  H    0.006130  -0.000194   0.001853  -0.079893   0.392800  -0.017507
    10  H   -0.042571   0.005873   0.000376   0.006281  -0.039088   0.398219
    11  C   -0.001473   0.014638   0.027047   0.190347  -0.040346   0.013393
    12  C    0.012912  -0.071248   0.170626   0.021666   0.008316  -0.001988
    13  C    0.000348  -0.003983  -0.111182  -0.094079   0.018954  -0.000217
    14  C   -0.000733   0.036356  -0.051286  -0.124737  -0.001696   0.000409
    15  C    0.000004   0.000074  -0.002741   0.026344  -0.001334  -0.000012
    16  C   -0.000014  -0.001318   0.037946  -0.004995   0.000032   0.000006
    17  C    0.000000   0.000006   0.000438  -0.000588  -0.000002   0.000000
    18  H    0.000001  -0.000003  -0.000100   0.002168  -0.000079  -0.000003
    19  C    0.000000  -0.000013  -0.000695   0.000354   0.000002   0.000000
    20  H   -0.000005  -0.000225   0.004809  -0.000191   0.000003   0.000001
    21  H    0.000000   0.000000  -0.000022   0.000010   0.000000   0.000000
    22  Br   0.000000   0.000000   0.000001  -0.000006   0.000000   0.000000
    23  O    0.001424   0.022152  -0.169048   0.006576   0.000004  -0.000009
    24  O   -0.000025  -0.000062   0.001046  -0.114457   0.003870   0.001241
    25  H   -0.000014   0.000056   0.000718  -0.013646   0.011311   0.000526
               7          8          9         10         11         12
     1  C    0.400474  -0.040235   0.006130  -0.042571  -0.001473   0.012912
     2  C   -0.043989   0.403133  -0.000194   0.005873   0.014638  -0.071248
     3  C    0.007781  -0.070666   0.001853   0.000376   0.027047   0.170626
     4  C   -0.000061   0.005583  -0.079893   0.006281   0.190347   0.021666
     5  C    0.007291  -0.001320   0.392800  -0.039088  -0.040346   0.008316
     6  C   -0.043508   0.007165  -0.017507   0.398219   0.013393  -0.001988
     7  H    0.461896  -0.006541  -0.000338  -0.005530  -0.000008  -0.000332
     8  H   -0.006541   0.468885   0.000091  -0.000260   0.000168  -0.011503
     9  H   -0.000338   0.000091   0.472556  -0.006613   0.006068  -0.000043
    10  H   -0.005530  -0.000260  -0.006613   0.460071  -0.000525   0.000039
    11  C   -0.000008   0.000168   0.006068  -0.000525   5.055108  -0.071513
    12  C   -0.000332  -0.011503  -0.000043   0.000039  -0.071513   4.815266
    13  C    0.000006  -0.000292   0.002002  -0.000010   0.322172   0.023295
    14  C   -0.000020   0.005019  -0.000064   0.000007  -0.018178   0.174433
    15  C    0.000000   0.000000  -0.000083   0.000000  -0.052725   0.006952
    16  C    0.000000  -0.000228  -0.000007   0.000000   0.019117  -0.076332
    17  C    0.000000   0.000001  -0.000001   0.000000   0.010028  -0.001300
    18  H    0.000000  -0.000001  -0.000025   0.000000  -0.012600  -0.000081
    19  C    0.000000  -0.000006   0.000000   0.000000  -0.000561   0.012296
    20  H    0.000000  -0.000104   0.000000   0.000000  -0.000128  -0.008827
    21  H    0.000000   0.000000   0.000000   0.000000   0.000036  -0.000316
    22  Br   0.000000   0.000000   0.000000   0.000000  -0.000472   0.000023
    23  O   -0.000052   0.026724   0.000005   0.000000  -0.001918   0.761758
    24  O    0.000000   0.000003  -0.000865  -0.000004   0.397506   0.000083
    25  H   -0.000001   0.000000   0.007333   0.000028  -0.046255  -0.000133
              13         14         15         16         17         18
     1  C    0.000348  -0.000733   0.000004  -0.000014   0.000000   0.000001
     2  C   -0.003983   0.036356   0.000074  -0.001318   0.000006  -0.000003
     3  C   -0.111182  -0.051286  -0.002741   0.037946   0.000438  -0.000100
     4  C   -0.094079  -0.124737   0.026344  -0.004995  -0.000588   0.002168
     5  C    0.018954  -0.001696  -0.001334   0.000032  -0.000002  -0.000079
     6  C   -0.000217   0.000409  -0.000012   0.000006   0.000000  -0.000003
     7  H    0.000006  -0.000020   0.000000   0.000000   0.000000   0.000000
     8  H   -0.000292   0.005019   0.000000  -0.000228   0.000001  -0.000001
     9  H    0.002002  -0.000064  -0.000083  -0.000007  -0.000001  -0.000025
    10  H   -0.000010   0.000007   0.000000   0.000000   0.000000   0.000000
    11  C    0.322172  -0.018178  -0.052725   0.019117   0.010028  -0.012600
    12  C    0.023295   0.174433   0.006952  -0.076332  -0.001300  -0.000081
    13  C    5.277556   0.471963   0.382251  -0.095141  -0.016448  -0.039388
    14  C    0.471963   5.623145  -0.093101   0.359074  -0.047944   0.005315
    15  C    0.382251  -0.093101   5.156257  -0.055852   0.470731   0.399665
    16  C   -0.095141   0.359074  -0.055852   5.145354  -0.018410  -0.000793
    17  C   -0.016448  -0.047944   0.470731  -0.018410   5.103244  -0.051212
    18  H   -0.039388   0.005315   0.399665  -0.000793  -0.051212   0.440907
    19  C   -0.037422  -0.039905  -0.043318   0.483919   0.440122   0.006121
    20  H    0.004253  -0.068815  -0.000561   0.401142   0.006820   0.000074
    21  H   -0.000194   0.007293   0.006455  -0.037720  -0.050862  -0.000160
    22  Br   0.009467  -0.000104  -0.087635   0.008003   0.283499  -0.005161
    23  O    0.006345  -0.171203  -0.000002   0.023588  -0.000017   0.000004
    24  O   -0.105447   0.004405   0.015917  -0.000130   0.000441   0.015114
    25  H    0.006387  -0.000183  -0.000429   0.000040   0.000065  -0.000682
              19         20         21         22         23         24
     1  C    0.000000  -0.000005   0.000000   0.000000   0.001424  -0.000025
     2  C   -0.000013  -0.000225   0.000000   0.000000   0.022152  -0.000062
     3  C   -0.000695   0.004809  -0.000022   0.000001  -0.169048   0.001046
     4  C    0.000354  -0.000191   0.000010  -0.000006   0.006576  -0.114457
     5  C    0.000002   0.000003   0.000000   0.000000   0.000004   0.003870
     6  C    0.000000   0.000001   0.000000   0.000000  -0.000009   0.001241
     7  H    0.000000   0.000000   0.000000   0.000000  -0.000052   0.000000
     8  H   -0.000006  -0.000104   0.000000   0.000000   0.026724   0.000003
     9  H    0.000000   0.000000   0.000000   0.000000   0.000005  -0.000865
    10  H    0.000000   0.000000   0.000000   0.000000   0.000000  -0.000004
    11  C   -0.000561  -0.000128   0.000036  -0.000472  -0.001918   0.397506
    12  C    0.012296  -0.008827  -0.000316   0.000023   0.761758   0.000083
    13  C   -0.037422   0.004253  -0.000194   0.009467   0.006345  -0.105447
    14  C   -0.039905  -0.068815   0.007293  -0.000104  -0.171203   0.004405
    15  C   -0.043318  -0.000561   0.006455  -0.087635  -0.000002   0.015917
    16  C    0.483919   0.401142  -0.037720   0.008003   0.023588  -0.000130
    17  C    0.440122   0.006820  -0.050862   0.283499  -0.000017   0.000441
    18  H    0.006121   0.000074  -0.000160  -0.005161   0.000004   0.015114
    19  C    5.046736  -0.038441   0.401765  -0.079262   0.001521   0.000047
    20  H   -0.038441   0.461001  -0.006305  -0.000253   0.025576   0.000001
    21  H    0.401765  -0.006305   0.446098  -0.004744  -0.000046   0.000000
    22  Br  -0.079262  -0.000253  -0.004744  34.907917   0.000000  -0.000023
    23  O    0.001521   0.025576  -0.000046   0.000000   7.837470   0.000000
    24  O    0.000047   0.000001   0.000000  -0.000023   0.000000   8.046320
    25  H   -0.000001  -0.000001   0.000000   0.000001  -0.000001   0.277479
              25
     1  C   -0.000014
     2  C    0.000056
     3  C    0.000718
     4  C   -0.013646
     5  C    0.011311
     6  C    0.000526
     7  H   -0.000001
     8  H    0.000000
     9  H    0.007333
    10  H    0.000028
    11  C   -0.046255
    12  C   -0.000133
    13  C    0.006387
    14  C   -0.000183
    15  C   -0.000429
    16  C    0.000040
    17  C    0.000065
    18  H   -0.000682
    19  C   -0.000001
    20  H   -0.000001
    21  H    0.000000
    22  Br   0.000001
    23  O   -0.000001
    24  O    0.277479
    25  H    0.318789
          Atomic-Atomic Spin Densities.
               1          2          3          4          5          6
     1  C    0.147086   0.014321  -0.009240   0.002299  -0.008260  -0.010831
     2  C    0.014321  -0.062084  -0.012997   0.003923  -0.000703  -0.000728
     3  C   -0.009240  -0.012997   0.159922  -0.020415   0.007355   0.002291
     4  C    0.002299   0.003923  -0.020415  -0.095153  -0.013525  -0.000398
     5  C   -0.008260  -0.000703   0.007355  -0.013525   0.146807   0.011479
     6  C   -0.010831  -0.000728   0.002291  -0.000398   0.011479  -0.066990
     7  H   -0.000571  -0.000186   0.000018  -0.000056  -0.000017   0.000211
     8  H   -0.000475   0.000763   0.001329  -0.000035   0.000041  -0.000044
     9  H   -0.000032   0.000001  -0.000027   0.000889  -0.000727   0.000174
    10  H   -0.000170   0.000026  -0.000030   0.000085  -0.000334   0.000752
    11  C    0.000397   0.000320  -0.012908   0.032715  -0.012550  -0.000691
    12  C   -0.000455   0.000514   0.024790  -0.000607   0.000034   0.000037
    13  C    0.000018  -0.000162  -0.001868  -0.001801  -0.000471   0.000002
    14  C   -0.000041  -0.000396   0.003282  -0.001143   0.000114   0.000010
    15  C    0.000000  -0.000011   0.000078  -0.000470   0.000085   0.000000
    16  C    0.000000   0.000061  -0.000426  -0.000123  -0.000009   0.000000
    17  C    0.000000   0.000000   0.000007   0.000022   0.000000   0.000000
    18  H    0.000000   0.000000  -0.000007  -0.000044   0.000005   0.000000
    19  C    0.000000   0.000000  -0.000039   0.000013   0.000000   0.000000
    20  H    0.000000   0.000011  -0.000063  -0.000006   0.000000   0.000000
    21  H    0.000000   0.000000   0.000000   0.000000   0.000000   0.000000
    22  Br   0.000000   0.000000   0.000000   0.000000   0.000000   0.000000
    23  O    0.000048   0.000777  -0.006035   0.000178  -0.000007  -0.000003
    24  O   -0.000005  -0.000002   0.000424   0.000612   0.001885   0.000006
    25  H   -0.000001   0.000000   0.000011   0.000254  -0.000099   0.000014
               7          8          9         10         11         12
     1  C   -0.000571  -0.000475  -0.000032  -0.000170   0.000397  -0.000455
     2  C   -0.000186   0.000763   0.000001   0.000026   0.000320   0.000514
     3  C    0.000018   0.001329  -0.000027  -0.000030  -0.012908   0.024790
     4  C   -0.000056  -0.000035   0.000889   0.000085   0.032715  -0.000607
     5  C   -0.000017   0.000041  -0.000727  -0.000334  -0.012550   0.000034
     6  C    0.000211  -0.000044   0.000174   0.000752  -0.000691   0.000037
     7  H   -0.006837   0.000074   0.000006   0.000052   0.000000   0.000009
     8  H    0.000074   0.001048  -0.000001  -0.000002  -0.000020   0.000124
     9  H    0.000006  -0.000001  -0.006525   0.000017  -0.000059  -0.000005
    10  H    0.000052  -0.000002   0.000017   0.002274  -0.000001  -0.000001
    11  C    0.000000  -0.000020  -0.000059  -0.000001   0.446918  -0.000626
    12  C    0.000009   0.000124  -0.000005  -0.000001  -0.000626  -0.025064
    13  C    0.000000  -0.000005  -0.000043   0.000000   0.037448  -0.000761
    14  C    0.000000  -0.000067  -0.000001   0.000000  -0.013936   0.024980
    15  C    0.000000   0.000000   0.000004   0.000000  -0.012057  -0.000026
    16  C    0.000000   0.000012   0.000000   0.000000  -0.000020   0.001050
    17  C    0.000000   0.000000   0.000000   0.000000  -0.000734   0.000062
    18  H    0.000000   0.000000   0.000001   0.000000   0.000124  -0.000002
    19  C    0.000000   0.000000   0.000000   0.000000   0.000408  -0.000459
    20  H    0.000000   0.000006   0.000000   0.000000  -0.000017   0.000099
    21  H    0.000000   0.000000   0.000000   0.000000   0.000000   0.000007
    22  Br   0.000000   0.000000   0.000000   0.000000   0.000013  -0.000001
    23  O    0.000001  -0.000637   0.000000   0.000000   0.000129  -0.029772
    24  O    0.000000   0.000000   0.000118   0.000000  -0.074510   0.000015
    25  H    0.000000   0.000000  -0.000116   0.000001   0.000001   0.000008
              13         14         15         16         17         18
     1  C    0.000018  -0.000041   0.000000   0.000000   0.000000   0.000000
     2  C   -0.000162  -0.000396  -0.000011   0.000061   0.000000   0.000000
     3  C   -0.001868   0.003282   0.000078  -0.000426   0.000007  -0.000007
     4  C   -0.001801  -0.001143  -0.000470  -0.000123   0.000022  -0.000044
     5  C   -0.000471   0.000114   0.000085  -0.000009   0.000000   0.000005
     6  C    0.000002   0.000010   0.000000   0.000000   0.000000   0.000000
     7  H    0.000000   0.000000   0.000000   0.000000   0.000000   0.000000
     8  H   -0.000005  -0.000067   0.000000   0.000012   0.000000   0.000000
     9  H   -0.000043  -0.000001   0.000004   0.000000   0.000000   0.000001
    10  H    0.000000   0.000000   0.000000   0.000000   0.000000   0.000000
    11  C    0.037448  -0.013936  -0.012057  -0.000020  -0.000734   0.000124
    12  C   -0.000761   0.024980  -0.000026   0.001050   0.000062  -0.000002
    13  C   -0.080807  -0.020825  -0.013815   0.003470  -0.001258   0.000578
    14  C   -0.020825   0.151734   0.007015  -0.009339   0.002700  -0.000078
    15  C   -0.013815   0.007015   0.133140   0.000225   0.013394  -0.000796
    16  C    0.003470  -0.009339   0.000225  -0.065431  -0.001046   0.000019
    17  C   -0.001258   0.002700   0.013394  -0.001046  -0.059848   0.000432
    18  H    0.000578  -0.000078  -0.000796   0.000019   0.000432  -0.006029
    19  C    0.002684  -0.008832  -0.007975   0.012628  -0.012540  -0.000050
    20  H   -0.000026   0.001335   0.000034   0.000715  -0.000026  -0.000001
    21  H   -0.000040   0.000005  -0.000040  -0.000125   0.000055   0.000004
    22  Br   0.000100  -0.000063  -0.001640   0.000019   0.004984   0.000003
    23  O    0.000208  -0.006007  -0.000006   0.000609  -0.000003   0.000000
    24  O   -0.002360   0.000355   0.002921  -0.000001   0.000014  -0.000149
    25  H   -0.000084  -0.000015   0.000017  -0.000001  -0.000002   0.000012
              19         20         21         22         23         24
     1  C    0.000000   0.000000   0.000000   0.000000   0.000048  -0.000005
     2  C    0.000000   0.000011   0.000000   0.000000   0.000777  -0.000002
     3  C   -0.000039  -0.000063   0.000000   0.000000  -0.006035   0.000424
     4  C    0.000013  -0.000006   0.000000   0.000000   0.000178   0.000612
     5  C    0.000000   0.000000   0.000000   0.000000  -0.000007   0.001885
     6  C    0.000000   0.000000   0.000000   0.000000  -0.000003   0.000006
     7  H    0.000000   0.000000   0.000000   0.000000   0.000001   0.000000
     8  H    0.000000   0.000006   0.000000   0.000000  -0.000637   0.000000
     9  H    0.000000   0.000000   0.000000   0.000000   0.000000   0.000118
    10  H    0.000000   0.000000   0.000000   0.000000   0.000000   0.000000
    11  C    0.000408  -0.000017   0.000000   0.000013   0.000129  -0.074510
    12  C   -0.000459   0.000099   0.000007  -0.000001  -0.029772   0.000015
    13  C    0.002684  -0.000026  -0.000040   0.000100   0.000208  -0.002360
    14  C   -0.008832   0.001335   0.000005  -0.000063  -0.006007   0.000355
    15  C   -0.007975   0.000034  -0.000040  -0.001640  -0.000006   0.002921
    16  C    0.012628   0.000715  -0.000125   0.000019   0.000609  -0.000001
    17  C   -0.012540  -0.000026   0.000055   0.004984  -0.000003   0.000014
    18  H   -0.000050  -0.000001   0.000004   0.000003   0.000000  -0.000149
    19  C    0.140965  -0.000523  -0.000530   0.000548   0.000045  -0.000008
    20  H   -0.000523   0.001128   0.000066  -0.000001  -0.000611   0.000000
    21  H   -0.000530   0.000066  -0.006293   0.000081   0.000001   0.000000
    22  Br   0.000548  -0.000001   0.000081  -0.005460   0.000000  -0.000002
    23  O    0.000045  -0.000611   0.000001   0.000000   0.217099   0.000000
    24  O   -0.000008   0.000000   0.000000  -0.000002   0.000000   0.163814
    25  H    0.000000   0.000000   0.000000   0.000000   0.000000  -0.001157
              25
     1  C   -0.000001
     2  C    0.000000
     3  C    0.000011
     4  C    0.000254
     5  C   -0.000099
     6  C    0.000014
     7  H    0.000000
     8  H    0.000000
     9  H   -0.000116
    10  H    0.000001
    11  C    0.000001
    12  C    0.000008
    13  C   -0.000084
    14  C   -0.000015
    15  C    0.000017
    16  C   -0.000001
    17  C   -0.000002
    18  H    0.000012
    19  C    0.000000
    20  H    0.000000
    21  H    0.000000
    22  Br   0.000000
    23  O    0.000000
    24  O   -0.001157
    25  H   -0.002658
 Mulliken charges and spin densities:
               1          2
     1  C   -0.192741   0.134088
     2  C   -0.182855  -0.056554
     3  C   -0.088204   0.135451
     4  C    0.077579  -0.092787
     5  C   -0.226658   0.131103
     6  C   -0.199171  -0.064710
     7  H    0.222930  -0.007296
     8  H    0.214384   0.002110
     9  H    0.216796  -0.006326
    10  H    0.223705   0.002669
    11  C    0.191073   0.390345
    12  C    0.235950  -0.006050
    13  C   -0.021198  -0.079818
    14  C   -0.069448   0.130784
    15  C   -0.126859   0.120076
    16  C   -0.187277  -0.057715
    17  C   -0.128611  -0.053788
    18  H    0.240919  -0.005977
    19  C   -0.153257   0.126336
    20  H    0.220175   0.002119
    21  H    0.238714  -0.006809
    22  Br  -0.031251  -0.001418
    23  O   -0.370849   0.176012
    24  O   -0.542459   0.091970
    25  H    0.438611  -0.003817
 Sum of Mulliken charges =   0.00000   1.00000
 Mulliken charges and spin densities with hydrogens summed into heavy atoms:
               1          2
     1  C    0.030189   0.126793
     2  C    0.031529  -0.054444
     3  C   -0.088204   0.135451
     4  C    0.077579  -0.092787
     5  C   -0.009863   0.124777
     6  C    0.024535  -0.062041
    11  C    0.191073   0.390345
    12  C    0.235950  -0.006050
    13  C   -0.021198  -0.079818
    14  C   -0.069448   0.130784
    15  C    0.114060   0.114100
    16  C    0.032898  -0.055596
    17  C   -0.128611  -0.053788
    19  C    0.085457   0.119527
    22  Br  -0.031251  -0.001418
    23  O   -0.370849   0.176012
    24  O   -0.103848   0.088154
 Electronic spatial extent (au):  <R**2>=           6240.4869
 Charge=              0.0000 electrons
 Dipole moment (field-independent basis, Debye):
    X=             -3.2926    Y=             -5.6064    Z=              0.0002  Tot=              6.5018
 Quadrupole moment (field-independent basis, Debye-Ang):
   XX=            -93.5263   YY=           -104.4529   ZZ=           -113.9419
   XY=             19.2903   XZ=             -0.0002   YZ=             -0.0009
 Traceless Quadrupole moment (field-independent basis, Debye-Ang):
   XX=             10.4474   YY=             -0.4792   ZZ=             -9.9682
   XY=             19.2903   XZ=             -0.0002   YZ=             -0.0009
 Octapole moment (field-independent basis, Debye-Ang**2):
  XXX=              3.2207  YYY=            -86.3553  ZZZ=              0.0005  XYY=             39.0938
  XXY=            -39.0008  XXZ=             -0.0002  XZZ=             50.3649  YZZ=             -4.9171
  YYZ=              0.0019  XYZ=              0.0007
 Hexadecapole moment (field-independent basis, Debye-Ang**3):
 XXXX=          -5214.0303 YYYY=          -1312.0307 ZZZZ=           -125.4216 XXXY=             47.9769
 XXXZ=              0.0023 YYYX=            156.9890 YYYZ=             -0.0104 ZZZX=             -0.0007
 ZZZY=             -0.0007 XXYY=          -1120.9835 XXZZ=          -1091.7806 YYZZ=           -259.6348
 XXYZ=              0.0008 YYXZ=             -0.0021 ZZXY=            -27.9399
 N-N= 1.393023451093D+03 E-N=-1.054437451062D+04  KE= 3.257438342078D+03
                          Isotropic Fermi Contact Couplings
        Atom                 a.u.       MegaHertz       Gauss      10(-4) cm-1
     1  C(13)             -0.00995     -11.18926      -3.99261      -3.73234
     2  C(13)              0.01109      12.46923       4.44933       4.15929
     3  C(13)             -0.01250     -14.04764      -5.01255      -4.68579
     4  C(13)             -0.00331      -3.72129      -1.32785      -1.24129
     5  C(13)             -0.00194      -2.17807      -0.77719      -0.72653
     6  C(13)              0.00744       8.36474       2.98475       2.79018
     7  H(1)               0.00027       1.22619       0.43753       0.40901
     8  H(1)              -0.00299     -13.36458      -4.76882      -4.45795
     9  H(1)              -0.00059      -2.63763      -0.94117      -0.87982
    10  H(1)              -0.00230     -10.26583      -3.66310      -3.42431
    11  C(13)              0.00589       6.62488       2.36392       2.20982
    12  C(13)              0.00910      10.23392       3.65172       3.41367
    13  C(13)             -0.00382      -4.29773      -1.53354      -1.43357
    14  C(13)             -0.01303     -14.64588      -5.22602      -4.88534
    15  C(13)             -0.00153      -1.72530      -0.61563      -0.57550
    16  C(13)              0.01277      14.35229       5.12125       4.78741
    17  C(13)              0.01187      13.34830       4.76301       4.45251
    18  H(1)              -0.00086      -3.85807      -1.37665      -1.28691
    19  C(13)             -0.01162     -13.06864      -4.66322      -4.35923
    20  H(1)              -0.00345     -15.40151      -5.49564      -5.13739
    21  H(1)               0.00041       1.82541       0.65135       0.60889
    22  Br(79)             0.00260       2.92581       1.04400       0.97594
    23  O(17)              0.01052      -6.37535      -2.27488      -2.12659
    24  O(17)             -0.00008       0.04590       0.01638       0.01531
    25  H(1)              -0.00003      -0.12358      -0.04410      -0.04122
 --------------------------------------------------------
       Center         ----  Spin Dipole Couplings  ----
                      3XX-RR        3YY-RR        3ZZ-RR
 --------------------------------------------------------
     1   Atom        0.010713      0.016164     -0.026877
     2   Atom       -0.109637     -0.108992      0.218629
     3   Atom        0.012916      0.003517     -0.016433
     4   Atom       -0.000656     -0.002405      0.003060
     5   Atom       -0.019569     -0.023172      0.042740
     6   Atom       -0.083903     -0.084065      0.167968
     7   Atom        0.001197      0.001588     -0.002785
     8   Atom       -0.008892      0.011753     -0.002860
     9   Atom       -0.002591      0.004649     -0.002058
    10   Atom        0.000359      0.001188     -0.001547
    11   Atom       -0.050972     -0.051741      0.102714
    12   Atom       -0.121185     -0.117355      0.238540
    13   Atom        0.001709     -0.002554      0.000846
    14   Atom        0.011573      0.001050     -0.012623
    15   Atom       -0.029514     -0.030022      0.059535
    16   Atom       -0.125451     -0.125163      0.250614
    17   Atom       -0.099524     -0.105425      0.204948
    18   Atom       -0.003055      0.005052     -0.001997
    19   Atom        0.018205      0.016062     -0.034267
    20   Atom       -0.011632      0.014554     -0.002922
    21   Atom        0.000873      0.002374     -0.003247
    22   Atom       -0.176686     -0.086953      0.263639
    23   Atom       -0.235917     -0.248068      0.483985
    24   Atom       -0.006250     -0.006617      0.012867
    25   Atom       -0.000429      0.002572     -0.002143
 --------------------------------------------------------
                        XY            XZ            YZ
 --------------------------------------------------------
     1   Atom        0.004272      0.000000      0.000001
     2   Atom        0.000781     -0.000001     -0.000003
     3   Atom        0.002364     -0.000001      0.000000
     4   Atom        0.002033      0.000001      0.000000
     5   Atom       -0.000896     -0.000001     -0.000002
     6   Atom        0.001942     -0.000002     -0.000007
     7   Atom       -0.000644      0.000000      0.000000
     8   Atom       -0.005392      0.000000      0.000000
     9   Atom       -0.000390      0.000000      0.000000
    10   Atom        0.012064      0.000000      0.000000
    11   Atom        0.000402     -0.000002      0.000003
    12   Atom       -0.001127      0.000003     -0.000004
    13   Atom       -0.001080      0.000000      0.000000
    14   Atom        0.002116     -0.000001      0.000001
    15   Atom        0.002260      0.000001      0.000001
    16   Atom       -0.000938      0.000003      0.000004
    17   Atom       -0.001669      0.000001      0.000004
    18   Atom       -0.002567      0.000000      0.000000
    19   Atom       -0.005354      0.000000     -0.000001
    20   Atom       -0.004543      0.000000      0.000000
    21   Atom        0.000153      0.000000      0.000000
    22   Atom        0.036996      0.000000      0.000004
    23   Atom        0.002479      0.000012     -0.000009
    24   Atom        0.001956      0.000003      0.000003
    25   Atom        0.000100      0.000000      0.000000
 --------------------------------------------------------


 ---------------------------------------------------------------------------------
              Anisotropic Spin Dipole Couplings in Principal Axis System
 ---------------------------------------------------------------------------------

       Atom             a.u.   MegaHertz   Gauss  10(-4) cm-1        Axes

              Baa    -0.0269    -3.607    -1.287    -1.203  0.0000  0.0000  1.0000
     1 C(13)  Bbb     0.0084     1.123     0.401     0.375  0.8769 -0.4807  0.0000
              Bcc     0.0185     2.483     0.886     0.828  0.4807  0.8769  0.0000
 
              Baa    -0.1102   -14.782    -5.275    -4.931  0.8311 -0.5562  0.0000
     2 C(13)  Bbb    -0.1085   -14.556    -5.194    -4.855  0.5562  0.8311  0.0000
              Bcc     0.2186    29.338    10.468     9.786  0.0000  0.0000  1.0000
 
              Baa    -0.0164    -2.205    -0.787    -0.736  0.0000  0.0000  1.0000
     3 C(13)  Bbb     0.0030     0.397     0.142     0.132 -0.2309  0.9730  0.0000
              Bcc     0.0135     1.809     0.645     0.603  0.9730  0.2309  0.0000
 
              Baa    -0.0037    -0.502    -0.179    -0.168 -0.5499  0.8352  0.0000
     4 C(13)  Bbb     0.0007     0.092     0.033     0.031  0.8352  0.5499 -0.0002
              Bcc     0.0031     0.411     0.147     0.137  0.0002  0.0001  1.0000
 
              Baa    -0.0234    -3.138    -1.120    -1.047  0.2287  0.9735  0.0000
     5 C(13)  Bbb    -0.0194    -2.598    -0.927    -0.866  0.9735 -0.2287  0.0000
              Bcc     0.0427     5.735     2.047     1.913  0.0000  0.0000  1.0000
 
              Baa    -0.0859   -11.531    -4.114    -3.846 -0.6922  0.7217  0.0000
     6 C(13)  Bbb    -0.0820   -11.009    -3.928    -3.672  0.7217  0.6922  0.0000
              Bcc     0.1680    22.540     8.043     7.518  0.0000  0.0000  1.0000
 
              Baa    -0.0028    -1.486    -0.530    -0.496  0.0000  0.0000  1.0000
     7 H(1)   Bbb     0.0007     0.384     0.137     0.128  0.8034  0.5954  0.0000
              Bcc     0.0021     1.102     0.393     0.368 -0.5954  0.8034  0.0000
 
              Baa    -0.0102    -5.451    -1.945    -1.818  0.9712  0.2384  0.0000
     8 H(1)   Bbb    -0.0029    -1.526    -0.545    -0.509  0.0000  0.0000  1.0000
              Bcc     0.0131     6.977     2.489     2.327 -0.2384  0.9712  0.0000
 
              Baa    -0.0026    -1.394    -0.497    -0.465  0.9986  0.0536  0.0000
     9 H(1)   Bbb    -0.0021    -1.098    -0.392    -0.366  0.0000  0.0000  1.0000
              Bcc     0.0047     2.492     0.889     0.831 -0.0536  0.9986  0.0000
 
              Baa    -0.0113    -6.028    -2.151    -2.011  0.7192 -0.6949  0.0000
    10 H(1)   Bbb    -0.0015    -0.826    -0.295    -0.275  0.0000  0.0000  1.0000
              Bcc     0.0128     6.853     2.445     2.286  0.6949  0.7192  0.0000
 
              Baa    -0.0519    -6.966    -2.486    -2.324 -0.3932  0.9194  0.0000
    11 C(13)  Bbb    -0.0508    -6.817    -2.432    -2.274  0.9194  0.3932  0.0000
              Bcc     0.1027    13.783     4.918     4.598  0.0000  0.0000  1.0000
 
              Baa    -0.1215   -16.303    -5.817    -5.438  0.9649  0.2628  0.0000
    12 C(13)  Bbb    -0.1170   -15.707    -5.605    -5.239 -0.2628  0.9649  0.0000
              Bcc     0.2385    32.010    11.422    10.677  0.0000  0.0000  1.0000
 
              Baa    -0.0028    -0.377    -0.135    -0.126  0.2324  0.9726 -0.0001
    13 C(13)  Bbb     0.0008     0.113     0.040     0.038  0.0001  0.0001  1.0000
              Bcc     0.0020     0.264     0.094     0.088  0.9726 -0.2324 -0.0001
 
              Baa    -0.0126    -1.694    -0.604    -0.565  0.0000  0.0000  1.0000
    14 C(13)  Bbb     0.0006     0.086     0.031     0.029 -0.1900  0.9818  0.0001
              Bcc     0.0120     1.608     0.574     0.536  0.9818  0.1900  0.0000
 
              Baa    -0.0320    -4.300    -1.534    -1.434 -0.6664  0.7456  0.0000
    15 C(13)  Bbb    -0.0275    -3.689    -1.316    -1.231  0.7456  0.6664  0.0000
              Bcc     0.0595     7.989     2.851     2.665  0.0000  0.0000  1.0000
 
              Baa    -0.1263   -16.942    -6.045    -5.651  0.7589  0.6512  0.0000
    16 C(13)  Bbb    -0.1244   -16.688    -5.955    -5.566 -0.6512  0.7589  0.0000
              Bcc     0.2506    33.630    12.000    11.218  0.0000  0.0000  1.0000
 
              Baa    -0.1059   -14.206    -5.069    -4.739  0.2546  0.9671  0.0000
    17 C(13)  Bbb    -0.0991   -13.296    -4.744    -4.435  0.9671 -0.2546  0.0000
              Bcc     0.2049    27.502     9.813     9.174  0.0000  0.0000  1.0000
 
              Baa    -0.0038    -2.027    -0.723    -0.676  0.9604  0.2786  0.0000
    18 H(1)   Bbb    -0.0020    -1.066    -0.380    -0.355  0.0000  0.0000  1.0000
              Bcc     0.0058     3.093     1.104     1.032 -0.2786  0.9604  0.0000
 
              Baa    -0.0343    -4.598    -1.641    -1.534  0.0000  0.0000  1.0000
    19 C(13)  Bbb     0.0117     1.566     0.559     0.523  0.6339  0.7734  0.0000
              Bcc     0.0226     3.032     1.082     1.011  0.7734 -0.6339  0.0000
 
              Baa    -0.0124    -6.615    -2.360    -2.206  0.9861  0.1662  0.0000
    20 H(1)   Bbb    -0.0029    -1.559    -0.556    -0.520  0.0000  0.0000  1.0000
              Bcc     0.0153     8.174     2.917     2.727 -0.1662  0.9861  0.0000
 
              Baa    -0.0032    -1.732    -0.618    -0.578  0.0000  0.0000  1.0000
    21 H(1)   Bbb     0.0009     0.457     0.163     0.153  0.9949 -0.1005  0.0000
              Bcc     0.0024     1.275     0.455     0.425  0.1005  0.9949  0.0000
 
              Baa    -0.1900   -25.482    -9.093    -8.500  0.9412 -0.3380  0.0000
    22 Br(79) Bbb    -0.0737    -9.881    -3.526    -3.296  0.3380  0.9412  0.0000
              Bcc     0.2636    35.364    12.619    11.796  0.0000  0.0000  1.0000
 
              Baa    -0.2486    17.985     6.418     5.999 -0.1925  0.9813  0.0000
    23 O(17)  Bbb    -0.2354    17.036     6.079     5.682  0.9813  0.1925  0.0000
              Bcc     0.4840   -35.021   -12.496   -11.682  0.0000  0.0000  1.0000
 
              Baa    -0.0084     0.608     0.217     0.203 -0.6733  0.7393  0.0000
    24 O(17)  Bbb    -0.0045     0.323     0.115     0.108  0.7393  0.6733 -0.0003
              Bcc     0.0129    -0.931    -0.332    -0.311  0.0002  0.0002  1.0000
 
              Baa    -0.0021    -1.143    -0.408    -0.381  0.0001  0.0001  1.0000
    25 H(1)   Bbb    -0.0004    -0.231    -0.082    -0.077  0.9994 -0.0334 -0.0001
              Bcc     0.0026     1.374     0.490     0.458  0.0334  0.9994 -0.0001
 

 ---------------------------------------------------------------------------------

 No NMR shielding tensors so no spin-rotation constants.
 Leave Link  601 at Fri Jan 10 12:39:25 2020, MaxMem=   134217728 cpu:         1.0
 (Enter E:\Gaussian\G09W\l701.exe)
 Compute integral first derivatives.
 ... and contract with generalized density number  6.
 R6Disp: Adding Grimme-D3(BJ) dispersion energy 1st derivatives to the gradient.
 D1PCM: PCM CHGder 1st derivatives, ID1Alg=3 FixD1E=F DoIter=F DoCFld=F I1PDM=6.
 Leave Link  701 at Fri Jan 10 12:40:13 2020, MaxMem=   134217728 cpu:        48.0
 (Enter E:\Gaussian\G09W\l702.exe)
 L702 exits ... SP integral derivatives will be done elsewhere.
 Leave Link  702 at Fri Jan 10 12:40:13 2020, MaxMem=   134217728 cpu:         0.0
 (Enter E:\Gaussian\G09W\l703.exe)
 Compute integral first derivatives, UseDBF=F ICtDFT=           0.
 Integral derivatives from FoFJK, PRISM(SPDF).
 Calling FoFJK, ICntrl=  10005127 FMM=F ISym2X=0 I1Cent= 0 IOpClX= 1 NMat=1 NMatS=1 NMatT=0.
 FoFJK:  IHMeth= 1 ICntrl=10005127 DoSepK=F KAlg= 0 I1Cent=   0 FoldK=F
 IRaf=         0 NMat=   1 IRICut=       1 DoRegI=T DoRafI=F ISym2E= 0.
 FoFCou: FMM=F IPFlag=           0 FMFlag=      100000 FMFlg1=         800
         NFxFlg=           0 DoJE=F BraDBF=F KetDBF=F FulRan=T
         wScrn=  0.000000 ICntrl=10005127 IOpCl=  1 I1Cent=           0 NGrid=           0
         NMat0=    1 NMatS0=      1 NMatT0=    0 NMatD0=    1 NMtDS0=    0 NMtDT0=    0
 Symmetry not used in FoFCou.
 Leave Link  703 at Fri Jan 10 12:44:30 2020, MaxMem=   134217728 cpu:       256.0
 (Enter E:\Gaussian\G09W\l716.exe)
 Dipole        =-1.38599736D+00-2.85427048D+00 7.08507893D-05
 ***** Axes restored to original set *****
 -------------------------------------------------------------------
 Center     Atomic                   Forces (Hartrees/Bohr)
 Number     Number              X              Y              Z
 -------------------------------------------------------------------
      1        6          -0.004185423   -0.024135296   -0.000000251
      2        6           0.011687101    0.009988072    0.000000041
      3        6          -0.000343399    0.004006098   -0.000000124
      4        6          -0.019652862   -0.005182897    0.000000557
      5        6           0.024305260   -0.000761494   -0.000000368
      6        6          -0.024867275    0.014474919    0.000000204
      7        1          -0.000316021   -0.000363893   -0.000000231
      8        1           0.000507902   -0.000448814    0.000000215
      9        1           0.000161630   -0.000176329    0.000000343
     10        1           0.000112720    0.000428029    0.000000183
     11        6           0.004955481   -0.018102669    0.000000299
     12        6           0.008346142   -0.028045826    0.000000534
     13        6           0.021670095    0.003036410   -0.000000880
     14        6          -0.005713796    0.003018982   -0.000000251
     15        6          -0.024426327   -0.013397073   -0.000000065
     16        6          -0.012074264    0.006824980    0.000000029
     17        6           0.018721543    0.028732390   -0.000000345
     18        1          -0.000002514    0.000054235   -0.000000040
     19        6           0.012392079   -0.021462783    0.000000410
     20        1          -0.000236971   -0.000652681    0.000000169
     21        1           0.000465565   -0.000088073   -0.000000131
     22       35           0.000305911   -0.000894425    0.000000017
     23        8          -0.004348065    0.019184107   -0.000000240
     24        8          -0.005130273    0.025738131    0.000001417
     25        1          -0.002334240   -0.001774100   -0.000001491
 -------------------------------------------------------------------
 Cartesian Forces:  Max     0.028732390 RMS     0.010494155
 Leave Link  716 at Fri Jan 10 12:44:31 2020, MaxMem=   134217728 cpu:         1.0
 (Enter E:\Gaussian\G09W\l103.exe)

 GradGradGradGradGradGradGradGradGradGradGradGradGradGradGradGradGradGrad
 Berny optimization.
 FormGI is forming the generalized inverse of G from B-inverse, IUseBI=4.
 Internal  Forces:  Max     0.025093658 RMS     0.005011644
 Search for a local minimum.
 Step number   1 out of a maximum of  146
 All quantities printed in internal units (Hartrees-Bohrs-Radians)
 RMS Force = .50116D-02 SwitMx=.10000D-02 MixMth= 1
 Mixed Optimization -- RFO/linear search
 Second derivative matrix not updated -- first step.
 ITU=  0
     Eigenvalues ---    0.01151   0.01351   0.01643   0.01709   0.01734
     Eigenvalues ---    0.01778   0.01840   0.01861   0.01884   0.02059
     Eigenvalues ---    0.02086   0.02105   0.02118   0.02148   0.02170
     Eigenvalues ---    0.02184   0.02198   0.02206   0.02217   0.02248
     Eigenvalues ---    0.02272   0.02389   0.16000   0.16000   0.16000
     Eigenvalues ---    0.16000   0.16000   0.16000   0.16000   0.16000
     Eigenvalues ---    0.17417   0.22000   0.22432   0.22575   0.23525
     Eigenvalues ---    0.24486   0.24617   0.25000   0.25000   0.25000
     Eigenvalues ---    0.25000   0.25000   0.25000   0.34451   0.34742
     Eigenvalues ---    0.35403   0.35520   0.35538   0.35637   0.35649
     Eigenvalues ---    0.35731   0.35931   0.37381   0.39752   0.40418
     Eigenvalues ---    0.41009   0.41269   0.41552   0.43460   0.43695
     Eigenvalues ---    0.44649   0.44713   0.47313   0.47517   0.48462
     Eigenvalues ---    0.48917   0.54497   0.55599   0.87757
 RFO step:  Lambda=-7.44337915D-03 EMin= 1.15137908D-02
 Linear search not attempted -- first point.
 Iteration  1 RMS(Cart)=  0.02238307 RMS(Int)=  0.00011080
 Iteration  2 RMS(Cart)=  0.00017844 RMS(Int)=  0.00001074
 Iteration  3 RMS(Cart)=  0.00000003 RMS(Int)=  0.00001074
 ITry= 1 IFail=0 DXMaxC= 9.77D-02 DCOld= 1.00D+10 DXMaxT= 3.00D-01 DXLimC= 3.00D+00 Rises=F
 Variable       Old X    -DE/DX   Delta X   Delta X   Delta X     New X
                                 (Linear)    (Quad)   (Total)
    R1        2.61488   0.01701   0.00000   0.03498   0.03500   2.64988
    R2        2.65433  -0.01292   0.00000  -0.02740  -0.02740   2.62693
    R3        2.04810   0.00019   0.00000   0.00052   0.00052   2.04862
    R4        2.64643  -0.00167   0.00000  -0.00408  -0.00406   2.64237
    R5        2.04653  -0.00053   0.00000  -0.00144  -0.00144   2.04509
    R6        2.69450  -0.00356   0.00000  -0.00947  -0.00947   2.68502
    R7        2.78198   0.00173   0.00000   0.00419   0.00419   2.78617
    R8        2.67736  -0.00652   0.00000  -0.01535  -0.01536   2.66199
    R9        2.69419   0.00527   0.00000   0.01287   0.01287   2.70705
   R10        2.60733   0.01789   0.00000   0.03632   0.03630   2.64363
   R11        2.05025   0.00019   0.00000   0.00053   0.00053   2.05078
   R12        2.04840  -0.00037   0.00000  -0.00103  -0.00103   2.04737
   R13        2.69225   0.00690   0.00000   0.01675   0.01674   2.70900
   R14        2.54604  -0.02509   0.00000  -0.04454  -0.04454   2.50150
   R15        2.77706  -0.00055   0.00000  -0.00198  -0.00197   2.77508
   R16        2.33984   0.01967   0.00000   0.02222   0.02222   2.36207
   R17        2.68334  -0.00256   0.00000  -0.00656  -0.00655   2.67679
   R18        2.67457  -0.00712   0.00000  -0.01660  -0.01662   2.65795
   R19        2.64726   0.00144   0.00000   0.00283   0.00285   2.65012
   R20        2.60176   0.02145   0.00000   0.04281   0.04279   2.64455
   R21        2.04189  -0.00005   0.00000  -0.00013  -0.00013   2.04177
   R22        2.61280   0.01641   0.00000   0.03359   0.03360   2.64640
   R23        2.04634  -0.00059   0.00000  -0.00163  -0.00163   2.04471
   R24        2.65349  -0.01388   0.00000  -0.02971  -0.02971   2.62377
   R25        3.62374   0.00057   0.00000   0.00314   0.00314   3.62689
   R26        2.04505   0.00029   0.00000   0.00079   0.00079   2.04584
   R27        1.82282   0.00294   0.00000   0.00532   0.00532   1.82814
    A1        2.08883   0.00278   0.00000   0.01499   0.01500   2.10383
    A2        2.09922  -0.00095   0.00000  -0.00486  -0.00487   2.09435
    A3        2.09514  -0.00183   0.00000  -0.01013  -0.01013   2.08501
    A4        2.11339  -0.00065   0.00000  -0.00296  -0.00293   2.11046
    A5        2.11324   0.00076   0.00000   0.00409   0.00407   2.11732
    A6        2.05655  -0.00011   0.00000  -0.00113  -0.00114   2.05541
    A7        2.08712  -0.00323   0.00000  -0.01422  -0.01420   2.07292
    A8        2.07578   0.00471   0.00000   0.02045   0.02043   2.09622
    A9        2.12028  -0.00148   0.00000  -0.00622  -0.00623   2.11404
   A10        2.06448   0.00631   0.00000   0.02213   0.02212   2.08660
   A11        2.08113  -0.00605   0.00000  -0.02241  -0.02241   2.05872
   A12        2.13758  -0.00027   0.00000   0.00028   0.00029   2.13786
   A13        2.11053  -0.00031   0.00000  -0.00121  -0.00124   2.10929
   A14        2.11575   0.00003   0.00000  -0.00016  -0.00014   2.11561
   A15        2.05690   0.00028   0.00000   0.00136   0.00138   2.05829
   A16        2.10202  -0.00491   0.00000  -0.01873  -0.01875   2.08327
   A17        2.09452   0.00219   0.00000   0.00778   0.00780   2.10232
   A18        2.08665   0.00272   0.00000   0.01094   0.01095   2.09760
   A19        2.12060   0.00843   0.00000   0.03356   0.03356   2.15415
   A20        2.14496  -0.00513   0.00000  -0.02035  -0.02035   2.12460
   A21        2.01763  -0.00329   0.00000  -0.01320  -0.01320   2.00443
   A22        2.03667   0.00694   0.00000   0.02455   0.02456   2.06124
   A23        2.12402  -0.00382   0.00000  -0.01363  -0.01364   2.11038
   A24        2.12249  -0.00312   0.00000  -0.01092  -0.01093   2.11157
   A25        2.09352  -0.00629   0.00000  -0.02313  -0.02312   2.07040
   A26        2.10751   0.00032   0.00000   0.00219   0.00220   2.10971
   A27        2.08215   0.00597   0.00000   0.02094   0.02093   2.10308
   A28        2.11417  -0.00154   0.00000  -0.00635  -0.00635   2.10782
   A29        2.08630   0.00448   0.00000   0.01906   0.01904   2.10533
   A30        2.08271  -0.00293   0.00000  -0.01271  -0.01268   2.07003
   A31        2.08192  -0.00046   0.00000  -0.00243  -0.00246   2.07946
   A32        2.08839   0.00023   0.00000   0.00122   0.00124   2.08963
   A33        2.11287   0.00023   0.00000   0.00120   0.00122   2.11410
   A34        2.11794  -0.00092   0.00000  -0.00412  -0.00408   2.11386
   A35        2.06333   0.00008   0.00000  -0.00017  -0.00019   2.06313
   A36        2.10192   0.00083   0.00000   0.00429   0.00427   2.10619
   A37        2.13162  -0.00444   0.00000  -0.01575  -0.01578   2.11584
   A38        2.08048   0.00082   0.00000   0.00244   0.00245   2.08293
   A39        2.07108   0.00362   0.00000   0.01331   0.01333   2.08441
   A40        2.07002   0.00277   0.00000   0.01407   0.01408   2.08410
   A41        2.10944  -0.00099   0.00000  -0.00467  -0.00467   2.10476
   A42        2.10372  -0.00178   0.00000  -0.00940  -0.00940   2.09432
   A43        1.95616  -0.00007   0.00000  -0.00040  -0.00040   1.95576
    D1       -0.00001   0.00000   0.00000   0.00000   0.00000  -0.00001
    D2        3.14158   0.00000   0.00000   0.00000   0.00000   3.14158
    D3        3.14159   0.00000   0.00000   0.00000   0.00000   3.14159
    D4       -0.00001   0.00000   0.00000   0.00000   0.00000  -0.00001
    D5        0.00001   0.00000   0.00000   0.00000   0.00000   0.00000
    D6       -3.14158   0.00000   0.00000  -0.00001  -0.00001  -3.14158
    D7       -3.14159   0.00000   0.00000   0.00000   0.00000  -3.14159
    D8        0.00001   0.00000   0.00000   0.00000   0.00000   0.00001
    D9        0.00000   0.00000   0.00000   0.00000   0.00000   0.00000
   D10        3.14158   0.00000   0.00000   0.00000   0.00000   3.14158
   D11       -3.14159   0.00000   0.00000   0.00000   0.00000  -3.14159
   D12        0.00000   0.00000   0.00000   0.00000   0.00000  -0.00001
   D13        0.00001   0.00000   0.00000   0.00000   0.00000   0.00001
   D14       -3.14157   0.00000   0.00000  -0.00001  -0.00001  -3.14158
   D15       -3.14157   0.00000   0.00000   0.00000   0.00000  -3.14158
   D16        0.00003   0.00000   0.00000  -0.00001  -0.00001   0.00002
   D17       -3.14159   0.00000   0.00000   0.00000   0.00000  -3.14158
   D18        0.00001   0.00000   0.00000  -0.00001  -0.00001   0.00000
   D19        0.00000   0.00000   0.00000   0.00001   0.00001   0.00001
   D20       -3.14159   0.00000   0.00000  -0.00001  -0.00001   3.14158
   D21       -0.00001   0.00000   0.00000   0.00000   0.00000  -0.00001
   D22        3.14155   0.00000   0.00000   0.00001   0.00001   3.14156
   D23        3.14157   0.00000   0.00000   0.00000   0.00000   3.14158
   D24       -0.00004   0.00000   0.00000   0.00001   0.00001  -0.00003
   D25       -0.00003   0.00000   0.00000   0.00000   0.00000  -0.00003
   D26        3.14157   0.00000   0.00000   0.00001   0.00001   3.14158
   D27        3.14156   0.00000   0.00000   0.00000   0.00000   3.14156
   D28       -0.00002   0.00000   0.00000   0.00001   0.00001  -0.00001
   D29        0.00000   0.00000   0.00000   0.00000   0.00000   0.00000
   D30        3.14159   0.00000   0.00000   0.00000   0.00000   3.14159
   D31       -3.14157   0.00000   0.00000   0.00000   0.00000  -3.14157
   D32        0.00002   0.00000   0.00000   0.00000   0.00000   0.00002
   D33        0.00001   0.00000   0.00000   0.00000   0.00000   0.00002
   D34       -3.14158   0.00000   0.00000   0.00000   0.00000  -3.14158
   D35       -3.14158   0.00000   0.00000   0.00000   0.00000  -3.14159
   D36        0.00000   0.00000   0.00000   0.00000   0.00000   0.00000
   D37       -0.00014   0.00000   0.00000   0.00005   0.00005  -0.00009
   D38        3.14146   0.00000   0.00000   0.00005   0.00005   3.14151
   D39       -0.00002   0.00000   0.00000   0.00000   0.00000  -0.00002
   D40        3.14158   0.00000   0.00000   0.00000   0.00000   3.14158
   D41        3.14157   0.00000   0.00000   0.00002   0.00002   3.14159
   D42       -0.00001   0.00000   0.00000   0.00002   0.00002   0.00000
   D43        0.00001   0.00000   0.00000   0.00000   0.00000   0.00001
   D44       -3.14159   0.00000   0.00000  -0.00001  -0.00001   3.14159
   D45       -3.14158   0.00000   0.00000   0.00000   0.00000  -3.14158
   D46        0.00001   0.00000   0.00000   0.00000   0.00000   0.00000
   D47        3.14159   0.00000   0.00000   0.00001   0.00001  -3.14159
   D48        0.00000   0.00000   0.00000   0.00000   0.00000   0.00000
   D49       -0.00001   0.00000   0.00000   0.00000   0.00000   0.00000
   D50        3.14159   0.00000   0.00000   0.00000   0.00000   3.14159
   D51        3.14158   0.00000   0.00000   0.00000   0.00000   3.14158
   D52       -0.00001   0.00000   0.00000   0.00000   0.00000  -0.00001
   D53        0.00000   0.00000   0.00000   0.00000   0.00000   0.00000
   D54        3.14159   0.00000   0.00000   0.00000   0.00000  -3.14159
   D55        0.00000   0.00000   0.00000   0.00000   0.00000   0.00000
   D56       -3.14159   0.00000   0.00000   0.00000   0.00000  -3.14159
   D57       -3.14159   0.00000   0.00000   0.00000   0.00000  -3.14159
   D58        0.00000   0.00000   0.00000   0.00000   0.00000   0.00000
   D59        0.00000   0.00000   0.00000   0.00000   0.00000   0.00000
   D60       -3.14159   0.00000   0.00000   0.00000   0.00000  -3.14159
   D61        3.14159   0.00000   0.00000   0.00000   0.00000   3.14159
   D62        0.00000   0.00000   0.00000   0.00000   0.00000   0.00000
   D63        0.00000   0.00000   0.00000   0.00000   0.00000   0.00000
   D64        3.14159   0.00000   0.00000   0.00000   0.00000   3.14159
   D65       -3.14159   0.00000   0.00000   0.00000   0.00000  -3.14159
   D66        0.00000   0.00000   0.00000   0.00000   0.00000   0.00000
         Item               Value     Threshold  Converged?
 Maximum Force            0.025094     0.000450     NO 
 RMS     Force            0.005012     0.000300     NO 
 Maximum Displacement     0.097664     0.001800     NO 
 RMS     Displacement     0.022359     0.001200     NO 
 Predicted change in Energy=-3.789892D-03
 Lowest energy point so far.  Saving SCF results.
 GradGradGradGradGradGradGradGradGradGradGradGradGradGradGradGradGradGrad

 Leave Link  103 at Fri Jan 10 12:44:32 2020, MaxMem=   134217728 cpu:         1.0
 (Enter E:\Gaussian\G09W\l202.exe)
                          Input orientation:                          
 ---------------------------------------------------------------------
 Center     Atomic      Atomic             Coordinates (Angstroms)
 Number     Number       Type             X           Y           Z
 ---------------------------------------------------------------------
      1          6           0       -5.084112    0.059520   -0.000003
      2          6           0       -4.043061    0.998954    0.000009
      3          6           0       -2.706000    0.589741    0.000009
      4          6           0       -2.416588   -0.801325    0.000000
      5          6           0       -3.474764   -1.731165   -0.000023
      6          6           0       -4.806443   -1.302575   -0.000021
      7          1           0       -6.115487    0.393439    0.000001
      8          1           0       -4.244910    2.062178    0.000015
      9          1           0       -3.284625   -2.799604   -0.000059
     10          1           0       -5.611885   -2.027187   -0.000039
     11          6           0       -1.040979   -1.201057    0.000016
     12          6           0       -1.625581    1.592976    0.000011
     13          6           0        0.051152   -0.272465    0.000004
     14          6           0       -0.237255    1.114361   -0.000003
     15          6           0        1.383037   -0.724566    0.000005
     16          6           0        0.831473    2.022377   -0.000012
     17          6           0        2.421282    0.213767   -0.000006
     18          1           0        1.588778   -1.785252    0.000016
     19          6           0        2.159267    1.577262   -0.000015
     20          1           0        0.603866    3.080180   -0.000015
     21          1           0        2.977894    2.285711   -0.000022
     22         35           0        4.240832   -0.396826   -0.000005
     23          8           0       -1.884663    2.815783    0.000012
     24          8           0       -0.686609   -2.476478    0.000029
     25          1           0       -1.453237   -3.066532    0.000108
 ---------------------------------------------------------------------
                    Distance matrix (angstroms):
                    1          2          3          4          5
     1  C    0.000000
     2  C    1.402256   0.000000
     3  C    2.436503   1.398280   0.000000
     4  C    2.802987   2.426195   1.420854   0.000000
     5  C    2.407603   2.788639   2.444914   1.408665   0.000000
     6  C    1.390109   2.424827   2.827140   2.441855   1.398948
     7  H    1.084084   2.159074   3.415134   3.887071   3.389301
     8  H    2.171381   1.082215   2.129862   3.397413   3.870733
     9  H    3.378276   3.873535   3.438382   2.178671   1.085226
    10  H    2.152415   3.408626   3.910560   3.422376   2.157524
    11  C    4.235089   3.721901   2.445251   1.432510   2.490848
    12  C    3.783242   2.489392   1.474376   2.521581   3.803865
    13  C    5.145984   4.287084   2.888821   2.523774   3.815743
    14  C    4.960313   3.807555   2.523871   2.901611   4.310277
    15  C    6.514507   5.693247   4.295070   3.800400   4.960995
    16  C    6.232732   4.980811   3.816564   4.303858   5.712509
    17  C    7.506978   6.511855   5.141048   4.943218   6.208552
    18  H    6.923196   6.282469   4.907720   4.124448   5.063831
    19  C    7.400681   6.229231   4.964476   5.157144   6.533606
    20  H    6.440300   5.091702   4.142161   4.918254   6.307477
    21  H    8.363723   7.137896   5.931523   6.215322   7.600796
    22  Br   9.336103   8.400660   7.016537   6.669697   7.830127
    23  O    4.222967   2.821267   2.372732   3.656011   4.816966
    24  O    5.076349   4.831604   3.671463   2.408104   2.886053
    25  H    4.791185   4.820307   3.864938   2.461545   2.422762
                    6          7          8          9         10
     6  C    0.000000
     7  H    2.142443   0.000000
     8  H    3.411287   2.506741   0.000000
     9  H    2.134719   4.267237   4.955711   0.000000
    10  H    1.083420   2.472457   4.311789   2.452095   0.000000
    11  C    3.766832   5.319122   4.573169   2.754868   4.644962
    12  C    4.301406   4.647381   2.661021   4.695443   5.384811
    13  C    4.965617   6.202489   4.889448   4.184954   5.928662
    14  C    5.169047   5.922275   4.118210   4.960402   6.225429
    15  C    6.216409   7.581411   6.280105   5.108116   7.115177
    16  C    6.545334   7.135383   5.076538   6.339855   7.610244
    17  C    7.385072   8.538660   6.917712   6.452734   8.339882
    18  H    6.413410   8.006398   6.988178   4.977848   7.204726
    19  C    7.537544   8.359007   6.422510   6.985193   8.566379
    20  H    6.962756   7.236593   4.954488   7.049271   8.044920
    21  H    8.571563   9.288180   7.226262   8.067191   9.611732
    22  Br   9.092500  10.386427   8.834846   7.899737   9.986696
    23  O    5.049521   4.875205   2.477637   5.787268   6.111181
    24  O    4.283816   6.140778   5.767227   2.618033   4.945726
    25  H    3.788869   5.805857   5.839272   1.850738   4.286559
                   11         12         13         14         15
    11  C    0.000000
    12  C    2.854537   0.000000
    13  C    1.433539   2.508247   0.000000
    14  C    2.450945   1.468509   1.416497   0.000000
    15  C    2.470404   3.797733   1.406524   2.450918   0.000000
    16  C    3.727815   2.494293   2.423881   1.402381   2.801770
    17  C    3.740184   4.275432   2.419491   2.806936   1.399436
    18  H    2.693865   4.663103   2.157039   3.426683   1.080456
    19  C    4.237999   3.784881   2.804574   2.440819   2.429186
    20  H    4.586339   2.679964   3.397899   2.138207   3.883709
    21  H    5.320610   4.655305   3.887169   3.421878   3.406661
    22  Br   5.342688   6.194684   4.191525   4.726198   2.876527
    23  O    4.104486   1.249953   3.644812   2.368288   4.817876
    24  O    1.323736   4.176377   2.324213   3.618846   2.711573
    25  H    1.910485   4.662694   3.173326   4.354133   3.678213
                   16         17         18         19         20
    16  C    0.000000
    17  C    2.408021   0.000000
    18  H    3.882209   2.165442   0.000000
    19  C    1.400416   1.388441   3.410565   0.000000
    20  H    1.082013   3.394013   4.964119   2.162877   0.000000
    21  H    2.162515   2.145407   4.301440   1.082613   2.503436
    22  Br   4.180463   1.919267   2.993512   2.868786   5.031609
    23  O    2.829645   5.031069   5.764922   4.229339   2.502535
    24  O    4.748080   4.110523   2.378062   4.952960   5.704539
    25  H    5.578252   5.076638   3.300839   5.883452   6.481800
                   21         22         23         24         25
    21  H    0.000000
    22  Br   2.964965   0.000000
    23  O    4.891364   6.916831   0.000000
    24  O    6.008912   5.348329   5.426174   0.000000
    25  H    6.948484   6.288860   5.898115   0.967410   0.000000
 Stoichiometry    C14H8BrO2(2)
 Framework group  C1[X(C14H8BrO2)]
 Deg. of freedom    69
 Full point group                 C1      NOp   1
 RotChk:  IX=0 Diff= 6.05D-04
 Largest Abelian subgroup         C1      NOp   1
 Largest concise Abelian subgroup C1      NOp   1
                         Standard orientation:                         
 ---------------------------------------------------------------------
 Center     Atomic      Atomic             Coordinates (Angstroms)
 Number     Number       Type             X           Y           Z
 ---------------------------------------------------------------------
      1          6           0       -5.089647    0.058857   -0.000003
      2          6           0       -4.048999    0.998736    0.000009
      3          6           0       -2.711763    0.590096    0.000009
      4          6           0       -2.421755   -0.800847    0.000000
      5          6           0       -3.479533   -1.731139   -0.000023
      6          6           0       -4.811395   -1.303119   -0.000021
      7          1           0       -6.121166    0.392334    0.000001
      8          1           0       -4.251303    2.061874    0.000015
      9          1           0       -3.288936   -2.799497   -0.000059
     10          1           0       -5.616527   -2.028076   -0.000038
     11          6           0       -1.045975   -1.199990    0.000017
     12          6           0       -1.631773    1.593793    0.000012
     13          6           0        0.045758   -0.270930    0.000004
     14          6           0       -0.243243    1.115772   -0.000003
     15          6           0        1.377836   -0.722461    0.000005
     16          6           0        0.825096    2.024246   -0.000012
     17          6           0        2.415680    0.216316   -0.000006
     18          1           0        1.584032   -1.783059    0.000016
     19          6           0        2.153082    1.579699   -0.000015
     20          1           0        0.597037    3.081951   -0.000014
     21          1           0        2.971405    2.288499   -0.000022
     22         35           0        4.235491   -0.393497   -0.000005
     23          8           0       -1.891379    2.816489    0.000012
     24          8           0       -0.691059   -2.475259    0.000029
     25          1           0       -1.457435   -3.065641    0.000108
 ---------------------------------------------------------------------
 Rotational constants (GHZ):      0.9902436      0.1757519      0.1492606
 Leave Link  202 at Fri Jan 10 12:44:32 2020, MaxMem=   134217728 cpu:         0.0
 (Enter E:\Gaussian\G09W\l301.exe)
 Standard basis: 6-311G(d) (5D, 7F)
 Ernie: Thresh=  0.10000D-02 Tol=  0.10000D-05 Strict=F.
 There are   375 symmetry adapted cartesian basis functions of A   symmetry.
 There are   356 symmetry adapted basis functions of A   symmetry.
   356 basis functions,   642 primitive gaussians,   375 cartesian basis functions
    72 alpha electrons       71 beta electrons
       nuclear repulsion energy      1390.8167113492 Hartrees.
 IExCor=  402 DFT=T Ex+Corr=B3LYP ExCW=0 ScaHFX=  0.200000
 ScaDFX=  0.800000  0.720000  1.000000  0.810000 ScalE2=  1.000000  1.000000
 IRadAn=      0 IRanWt=     -1 IRanGd=            0 ICorTp=0 IEmpDi=141
 NAtoms=   25 NActive=   25 NUniq=   25 SFac= 1.00D+00 NAtFMM=   60 NAOKFM=F Big=F
 Integral buffers will be    262144 words long.
 Raffenetti 2 integral format.
 Two-electron integral symmetry is turned on.
 R6Disp:  Grimme-D3(BJ) Dispersion energy=       -0.0632981398 Hartrees.
 Nuclear repulsion after empirical dispersion term =     1390.7534132095 Hartrees.
 ------------------------------------------------------------------------------
 Polarizable Continuum Model (PCM)
 =================================
 Model                : PCM (using non-symmetric T matrix).
 Atomic radii         : UFF (Universal Force Field).
 Polarization charges : Total charges.
 Charge compensation  : None.
 Solution method      : On-the-fly selection.
 Cavity type          : Scaled VdW (van der Waals Surface) (Alpha=1.100).
 Cavity algorithm     : GePol (No added spheres)
                        Default sphere list used, NSphG=   25.
                        Lebedev-Laikov grids with approx.  5.0 points / Ang**2.
                        Smoothing algorithm: Karplus/York (Gamma=1.0000).
                        Polarization charges: spherical gaussians, with
                                              point-specific exponents (IZeta= 3).
                        Self-potential: point-specific (ISelfS= 7).
                        Self-field    : sphere-specific E.n sum rule (ISelfD= 2).
 1st derivatives      : Analytical E(r).r(x)/FMM algorithm (CHGder, D1EAlg=3).
                        Cavity 1st derivative terms included.
 Solvent              : Acetonitrile, Eps=  35.688000 Eps(inf)=   1.806874
 ------------------------------------------------------------------------------
 GePol: Number of generator spheres                  =      25
 GePol: Total number of spheres                      =      25
 GePol: Number of exposed spheres                    =      25 (100.00%)
 GePol: Number of points                             =    2193
 GePol: Average weight of points                     =       0.13
 GePol: Minimum weight of points                     =   0.30D-07
 GePol: Maximum weight of points                     =    0.20577
 GePol: Number of points with low weight             =     135
 GePol: Fraction of low-weight points (<1% of avg)   =       6.16%
 GePol: Cavity surface area                          =    281.264 Ang**2
 GePol: Cavity volume                                =    308.131 Ang**3
 Leave Link  301 at Fri Jan 10 12:44:32 2020, MaxMem=   134217728 cpu:         0.0
 (Enter E:\Gaussian\G09W\l302.exe)
 NPDir=0 NMtPBC=     1 NCelOv=     1 NCel=       1 NClECP=     1 NCelD=      1
         NCelK=      1 NCelE2=     1 NClLst=     1 CellRange=     0.0.
 One-electron integrals computed using PRISM.
 NBasis=   356 RedAO= T EigKep=  8.61D-05  NBF=   356
 NBsUse=   356 1.00D-06 EigRej= -1.00D+00 NBFU=   356
 Precomputing XC quadrature grid using
 IXCGrd= 4 IRadAn=           0 IRanWt=          -1 IRanGd=           0 AccXCQ= 0.00D+00.
 Generated NRdTot=       0 NPtTot=           0 NUsed=           0 NTot=          16
 NSgBfM=   363   363   364   364   364 MxSgAt=    25 MxSgA2=    25.
 Leave Link  302 at Fri Jan 10 12:44:34 2020, MaxMem=   134217728 cpu:         1.0
 (Enter E:\Gaussian\G09W\l308.exe)
 Leave Link  308 at Fri Jan 10 12:44:35 2020, MaxMem=   134217728 cpu:         0.0
 (Enter E:\Gaussian\G09W\l303.exe)
 DipDrv:  MaxL=1.
 Leave Link  303 at Fri Jan 10 12:44:35 2020, MaxMem=   134217728 cpu:         0.0
 (Enter E:\Gaussian\G09W\l401.exe)
 Initial guess from the checkpoint file:  "E:\Gaussian file\2-BrHAQ excited opt.chk"
 B after Tr=     0.000000    0.000000    0.000000
         Rot=    1.000000    0.000001    0.000000    0.000473 Ang=   0.05 deg.
 Guess basis will be translated and rotated to current coordinates.
 JPrj=2 DoOrth=T DoCkMO=T.
 Initial guess <Sx>= 0.0000 <Sy>= 0.0000 <Sz>= 0.5000 <S**2>= 0.7731 S= 0.5115
 Generating alternative initial guess.
 ExpMin= 1.03D-01 ExpMax= 4.40D+05 ExpMxC= 1.51D+04 IAcc=2 IRadAn=         4 AccDes= 0.00D+00
 Harris functional with IExCor=  402 and IRadAn=       4 diagonalized for initial guess.
 HarFok:  IExCor=  402 AccDes= 0.00D+00 IRadAn=         4 IDoV= 1 UseB2=F ITyADJ=14
 ICtDFT=  3500011 ScaDFX=  1.000000  1.000000  1.000000  1.000000
 FoFCou: FMM=F IPFlag=           0 FMFlag=      100000 FMFlg1=           0
         NFxFlg=           0 DoJE=T BraDBF=F KetDBF=T FulRan=T
         wScrn=  0.000000 ICntrl=     500 IOpCl=  0 I1Cent=   200000004 NGrid=           0
         NMat0=    1 NMatS0=      1 NMatT0=    0 NMatD0=    1 NMtDS0=    0 NMtDT0=    0
 Petite list used in FoFCou.
 Harris En= -3263.19092133705    
 Leave Link  401 at Fri Jan 10 12:44:53 2020, MaxMem=   134217728 cpu:        17.0
 (Enter E:\Gaussian\G09W\l502.exe)
 UHF open shell SCF:
 Using DIIS extrapolation, IDIIS=  1040.
 Integral symmetry usage will be decided dynamically.
 IVT=      444890 IEndB=      444890 NGot=   134217728 MDV=   133930479
 LenX=   133930479 LenY=   133789413
 Requested convergence on RMS density matrix=1.00D-08 within 128 cycles.
 Requested convergence on MAX density matrix=1.00D-06.
 Requested convergence on             energy=1.00D-06.
 No special actions if energy rises.
 Fock matrices will be formed incrementally for  20 cycles.

 Cycle   1  Pass 1  IDiag  1:
 FoFJK:  IHMeth= 1 ICntrl=       0 DoSepK=F KAlg= 0 I1Cent=   0 FoldK=F
 IRaf= 780000000 NMat=   1 IRICut=       1 DoRegI=T DoRafI=F ISym2E= 0.
 FoFCou: FMM=F IPFlag=           0 FMFlag=      100000 FMFlg1=           0
         NFxFlg=           0 DoJE=F BraDBF=F KetDBF=F FulRan=T
         wScrn=  0.000000 ICntrl=       0 IOpCl=  1 I1Cent=           0 NGrid=           0
         NMat0=    1 NMatS0=      1 NMatT0=    0 NMatD0=    1 NMtDS0=    0 NMtDT0=    0
 Symmetry not used in FoFCou.
 Inv3:  Mode=1 IEnd=    14427747.
 Iteration    1 A*A^-1 deviation from unit magnitude is 2.66D-15 for   1174.
 Iteration    1 A*A^-1 deviation from orthogonality  is 1.88D-15 for   1386   1174.
 Iteration    1 A^-1*A deviation from unit magnitude is 2.66D-15 for    273.
 Iteration    1 A^-1*A deviation from orthogonality  is 3.54D-13 for   2011   1555.
 E= -3263.11909003799    
 DIIS: error= 1.57D-03 at cycle   1 NSaved=   1.
 NSaved= 1 IEnMin= 1 EnMin= -3263.11909003799     IErMin= 1 ErrMin= 1.57D-03
 ErrMax= 1.57D-03  0.00D+00 EMaxC= 1.00D-01 BMatC= 6.15D-03 BMatP= 6.15D-03
 IDIUse=3 WtCom= 9.84D-01 WtEn= 1.57D-02
 Coeff-Com:  0.100D+01
 Coeff-En:   0.100D+01
 Coeff:      0.100D+01
 Gap=     0.723 Goal=   None    Shift=    0.000
 Gap=     0.796 Goal=   None    Shift=    0.000
 GapD=    0.723 DampG=2.000 DampE=1.000 DampFc=2.0000 IDamp=-1.
 RMSDP=3.35D-04 MaxDP=1.13D-02              OVMax= 1.50D-02

 Cycle   2  Pass 1  IDiag  1:
 RMSU=  3.34D-04    CP:  1.00D+00
 E= -3263.12085446758     Delta-E=       -0.001764429589 Rises=F Damp=F
 DIIS: error= 9.84D-04 at cycle   2 NSaved=   2.
 NSaved= 2 IEnMin= 2 EnMin= -3263.12085446758     IErMin= 2 ErrMin= 9.84D-04
 ErrMax= 9.84D-04  0.00D+00 EMaxC= 1.00D-01 BMatC= 9.83D-04 BMatP= 6.15D-03
 IDIUse=3 WtCom= 9.90D-01 WtEn= 9.84D-03
 Coeff-Com:  0.173D+00 0.827D+00
 Coeff-En:   0.000D+00 0.100D+01
 Coeff:      0.171D+00 0.829D+00
 Gap=     0.103 Goal=   None    Shift=    0.000
 Gap=     0.138 Goal=   None    Shift=    0.000
 RMSDP=1.79D-04 MaxDP=8.25D-03 DE=-1.76D-03 OVMax= 8.33D-03

 Cycle   3  Pass 1  IDiag  1:
 RMSU=  1.64D-04    CP:  9.98D-01  8.18D-01
 E= -3263.12066836289     Delta-E=        0.000186104693 Rises=F Damp=F
 DIIS: error= 1.71D-03 at cycle   3 NSaved=   3.
 NSaved= 3 IEnMin= 2 EnMin= -3263.12085446758     IErMin= 2 ErrMin= 9.84D-04
 ErrMax= 1.71D-03  0.00D+00 EMaxC= 1.00D-01 BMatC= 2.03D-03 BMatP= 9.83D-04
 IDIUse=3 WtCom= 1.95D-01 WtEn= 8.05D-01
 Coeff-Com: -0.151D-02 0.595D+00 0.407D+00
 Coeff-En:   0.000D+00 0.636D+00 0.364D+00
 Coeff:     -0.295D-03 0.628D+00 0.372D+00
 Gap=     0.104 Goal=   None    Shift=    0.000
 Gap=     0.138 Goal=   None    Shift=    0.000
 RMSDP=1.17D-04 MaxDP=5.38D-03 DE= 1.86D-04 OVMax= 6.28D-03

 Cycle   4  Pass 1  IDiag  1:
 RMSU=  2.48D-05    CP:  1.00D+00  9.72D-01  3.93D-01
 E= -3263.12104677057     Delta-E=       -0.000378407681 Rises=F Damp=F
 DIIS: error= 1.51D-04 at cycle   4 NSaved=   4.
 NSaved= 4 IEnMin= 4 EnMin= -3263.12104677057     IErMin= 4 ErrMin= 1.51D-04
 ErrMax= 1.51D-04  0.00D+00 EMaxC= 1.00D-01 BMatC= 2.12D-05 BMatP= 9.83D-04
 IDIUse=3 WtCom= 9.98D-01 WtEn= 1.51D-03
 Coeff-Com: -0.105D-01 0.202D+00 0.123D+00 0.686D+00
 Coeff-En:   0.000D+00 0.000D+00 0.000D+00 0.100D+01
 Coeff:     -0.105D-01 0.201D+00 0.123D+00 0.686D+00
 Gap=     0.104 Goal=   None    Shift=    0.000
 Gap=     0.138 Goal=   None    Shift=    0.000
 RMSDP=8.99D-06 MaxDP=3.75D-04 DE=-3.78D-04 OVMax= 1.54D-03

 Cycle   5  Pass 1  IDiag  1:
 RMSU=  8.11D-06    CP:  1.00D+00  9.72D-01  3.84D-01  8.56D-01
 E= -3263.12105159932     Delta-E=       -0.000004828747 Rises=F Damp=F
 DIIS: error= 7.87D-05 at cycle   5 NSaved=   5.
 NSaved= 5 IEnMin= 5 EnMin= -3263.12105159932     IErMin= 5 ErrMin= 7.87D-05
 ErrMax= 7.87D-05  0.00D+00 EMaxC= 1.00D-01 BMatC= 5.58D-06 BMatP= 2.12D-05
 IDIUse=1 WtCom= 1.00D+00 WtEn= 0.00D+00
 Coeff-Com: -0.470D-02 0.605D-01 0.337D-01 0.376D+00 0.535D+00
 Coeff:     -0.470D-02 0.605D-01 0.337D-01 0.376D+00 0.535D+00
 Gap=     0.103 Goal=   None    Shift=    0.000
 Gap=     0.138 Goal=   None    Shift=    0.000
 RMSDP=3.30D-06 MaxDP=1.47D-04 DE=-4.83D-06 OVMax= 4.72D-04

 Cycle   6  Pass 1  IDiag  1:
 RMSU=  3.07D-06    CP:  1.00D+00  9.73D-01  3.83D-01  8.94D-01  9.05D-01
 E= -3263.12105312467     Delta-E=       -0.000001525354 Rises=F Damp=F
 DIIS: error= 2.35D-05 at cycle   6 NSaved=   6.
 NSaved= 6 IEnMin= 6 EnMin= -3263.12105312467     IErMin= 6 ErrMin= 2.35D-05
 ErrMax= 2.35D-05  0.00D+00 EMaxC= 1.00D-01 BMatC= 3.55D-07 BMatP= 5.58D-06
 IDIUse=1 WtCom= 1.00D+00 WtEn= 0.00D+00
 Coeff-Com: -0.182D-03-0.942D-02-0.795D-02 0.546D-01 0.184D+00 0.779D+00
 Coeff:     -0.182D-03-0.942D-02-0.795D-02 0.546D-01 0.184D+00 0.779D+00
 Gap=     0.104 Goal=   None    Shift=    0.000
 Gap=     0.138 Goal=   None    Shift=    0.000
 RMSDP=1.93D-06 MaxDP=6.90D-05 DE=-1.53D-06 OVMax= 6.52D-04

 Cycle   7  Pass 1  IDiag  1:
 RMSU=  1.31D-06    CP:  1.00D+00  9.73D-01  3.84D-01  9.27D-01  1.03D+00
                    CP:  1.12D+00
 E= -3263.12105336627     Delta-E=       -0.000000241598 Rises=F Damp=F
 DIIS: error= 1.64D-05 at cycle   7 NSaved=   7.
 NSaved= 7 IEnMin= 7 EnMin= -3263.12105336627     IErMin= 7 ErrMin= 1.64D-05
 ErrMax= 1.64D-05  0.00D+00 EMaxC= 1.00D-01 BMatC= 1.31D-07 BMatP= 3.55D-07
 IDIUse=1 WtCom= 1.00D+00 WtEn= 0.00D+00
 Coeff-Com:  0.914D-03-0.183D-01-0.121D-01-0.457D-01-0.208D-01 0.396D+00
 Coeff-Com:  0.700D+00
 Coeff:      0.914D-03-0.183D-01-0.121D-01-0.457D-01-0.208D-01 0.396D+00
 Coeff:      0.700D+00
 Gap=     0.104 Goal=   None    Shift=    0.000
 Gap=     0.138 Goal=   None    Shift=    0.000
 RMSDP=1.12D-06 MaxDP=3.73D-05 DE=-2.42D-07 OVMax= 2.92D-04

 Cycle   8  Pass 1  IDiag  1:
 RMSU=  7.00D-07    CP:  1.00D+00  9.74D-01  3.84D-01  9.46D-01  1.09D+00
                    CP:  1.29D+00  1.12D+00
 E= -3263.12105345088     Delta-E=       -0.000000084609 Rises=F Damp=F
 DIIS: error= 7.75D-06 at cycle   8 NSaved=   8.
 NSaved= 8 IEnMin= 8 EnMin= -3263.12105345088     IErMin= 8 ErrMin= 7.75D-06
 ErrMax= 7.75D-06  0.00D+00 EMaxC= 1.00D-01 BMatC= 3.87D-08 BMatP= 1.31D-07
 IDIUse=1 WtCom= 1.00D+00 WtEn= 0.00D+00
 Coeff-Com:  0.509D-03-0.639D-02-0.410D-02-0.364D-01-0.660D-01-0.177D-02
 Coeff-Com:  0.387D+00 0.727D+00
 Coeff:      0.509D-03-0.639D-02-0.410D-02-0.364D-01-0.660D-01-0.177D-02
 Coeff:      0.387D+00 0.727D+00
 Gap=     0.103 Goal=   None    Shift=    0.000
 Gap=     0.138 Goal=   None    Shift=    0.000
 RMSDP=7.45D-07 MaxDP=2.87D-05 DE=-8.46D-08 OVMax= 2.49D-04

 Cycle   9  Pass 1  IDiag  1:
 RMSU=  3.36D-07    CP:  1.00D+00  9.74D-01  3.83D-01  9.53D-01  1.13D+00
                    CP:  1.38D+00  1.40D+00  1.05D+00
 E= -3263.12105347611     Delta-E=       -0.000000025235 Rises=F Damp=F
 DIIS: error= 4.91D-06 at cycle   9 NSaved=   9.
 NSaved= 9 IEnMin= 9 EnMin= -3263.12105347611     IErMin= 9 ErrMin= 4.91D-06
 ErrMax= 4.91D-06  0.00D+00 EMaxC= 1.00D-01 BMatC= 8.88D-09 BMatP= 3.87D-08
 IDIUse=1 WtCom= 1.00D+00 WtEn= 0.00D+00
 Coeff-Com: -0.106D-04 0.253D-02 0.144D-02-0.270D-02-0.277D-01-0.107D+00
 Coeff-Com: -0.273D-02 0.360D+00 0.776D+00
 Coeff:     -0.106D-04 0.253D-02 0.144D-02-0.270D-02-0.277D-01-0.107D+00
 Coeff:     -0.273D-02 0.360D+00 0.776D+00
 Gap=     0.104 Goal=   None    Shift=    0.000
 Gap=     0.138 Goal=   None    Shift=    0.000
 RMSDP=3.50D-07 MaxDP=1.74D-05 DE=-2.52D-08 OVMax= 9.06D-05

 Cycle  10  Pass 1  IDiag  1:
 RMSU=  1.81D-07    CP:  1.00D+00  9.74D-01  3.83D-01  9.55D-01  1.14D+00
                    CP:  1.43D+00  1.52D+00  1.26D+00  8.53D-01
 E= -3263.12105348215     Delta-E=       -0.000000006038 Rises=F Damp=F
 DIIS: error= 1.57D-06 at cycle  10 NSaved=  10.
 NSaved=10 IEnMin=10 EnMin= -3263.12105348215     IErMin=10 ErrMin= 1.57D-06
 ErrMax= 1.57D-06  0.00D+00 EMaxC= 1.00D-01 BMatC= 2.05D-09 BMatP= 8.88D-09
 IDIUse=1 WtCom= 1.00D+00 WtEn= 0.00D+00
 Coeff-Com: -0.104D-03 0.250D-02 0.148D-02 0.559D-02-0.242D-02-0.517D-01
 Coeff-Com: -0.730D-01 0.349D-01 0.377D+00 0.706D+00
 Coeff:     -0.104D-03 0.250D-02 0.148D-02 0.559D-02-0.242D-02-0.517D-01
 Coeff:     -0.730D-01 0.349D-01 0.377D+00 0.706D+00
 Gap=     0.103 Goal=   None    Shift=    0.000
 Gap=     0.138 Goal=   None    Shift=    0.000
 RMSDP=1.46D-07 MaxDP=8.49D-06 DE=-6.04D-09 OVMax= 3.51D-05

 Cycle  11  Pass 1  IDiag  1:
 RMSU=  7.90D-08    CP:  1.00D+00  9.74D-01  3.83D-01  9.56D-01  1.15D+00
                    CP:  1.44D+00  1.56D+00  1.32D+00  1.06D+00  1.01D+00
 E= -3263.12105348323     Delta-E=       -0.000000001080 Rises=F Damp=F
 DIIS: error= 1.22D-06 at cycle  11 NSaved=  11.
 NSaved=11 IEnMin=11 EnMin= -3263.12105348323     IErMin=11 ErrMin= 1.22D-06
 ErrMax= 1.22D-06  0.00D+00 EMaxC= 1.00D-01 BMatC= 6.54D-10 BMatP= 2.05D-09
 IDIUse=1 WtCom= 1.00D+00 WtEn= 0.00D+00
 Coeff-Com: -0.519D-04 0.617D-03 0.353D-03 0.383D-02 0.612D-02 0.244D-02
 Coeff-Com: -0.361D-01-0.770D-01-0.794D-02 0.396D+00 0.712D+00
 Coeff:     -0.519D-04 0.617D-03 0.353D-03 0.383D-02 0.612D-02 0.244D-02
 Coeff:     -0.361D-01-0.770D-01-0.794D-02 0.396D+00 0.712D+00
 Gap=     0.103 Goal=   None    Shift=    0.000
 Gap=     0.138 Goal=   None    Shift=    0.000
 RMSDP=6.76D-08 MaxDP=4.42D-06 DE=-1.08D-09 OVMax= 1.18D-05

 Cycle  12  Pass 1  IDiag  1:
 RMSU=  4.35D-08    CP:  1.00D+00  9.74D-01  3.83D-01  9.55D-01  1.15D+00
                    CP:  1.45D+00  1.58D+00  1.34D+00  1.10D+00  1.21D+00
                    CP:  9.55D-01
 E= -3263.12105348354     Delta-E=       -0.000000000312 Rises=F Damp=F
 DIIS: error= 4.48D-07 at cycle  12 NSaved=  12.
 NSaved=12 IEnMin=12 EnMin= -3263.12105348354     IErMin=12 ErrMin= 4.48D-07
 ErrMax= 4.48D-07  0.00D+00 EMaxC= 1.00D-01 BMatC= 1.52D-10 BMatP= 6.54D-10
 IDIUse=1 WtCom= 1.00D+00 WtEn= 0.00D+00
 Coeff-Com: -0.181D-05-0.272D-03-0.205D-03 0.924D-03 0.407D-02 0.143D-01
 Coeff-Com: -0.107D-02-0.524D-01-0.101D+00 0.235D-01 0.365D+00 0.747D+00
 Coeff:     -0.181D-05-0.272D-03-0.205D-03 0.924D-03 0.407D-02 0.143D-01
 Coeff:     -0.107D-02-0.524D-01-0.101D+00 0.235D-01 0.365D+00 0.747D+00
 Gap=     0.103 Goal=   None    Shift=    0.000
 Gap=     0.138 Goal=   None    Shift=    0.000
 RMSDP=3.55D-08 MaxDP=2.17D-06 DE=-3.12D-10 OVMax= 5.02D-06

 Cycle  13  Pass 1  IDiag  1:
 RMSU=  1.71D-08    CP:  1.00D+00  9.74D-01  3.83D-01  9.56D-01  1.15D+00
                    CP:  1.45D+00  1.58D+00  1.36D+00  1.13D+00  1.30D+00
                    CP:  1.19D+00  9.94D-01
 E= -3263.12105348367     Delta-E=       -0.000000000122 Rises=F Damp=F
 DIIS: error= 1.90D-07 at cycle  13 NSaved=  13.
 NSaved=13 IEnMin=13 EnMin= -3263.12105348367     IErMin=13 ErrMin= 1.90D-07
 ErrMax= 1.90D-07  0.00D+00 EMaxC= 1.00D-01 BMatC= 3.66D-11 BMatP= 1.52D-10
 IDIUse=1 WtCom= 1.00D+00 WtEn= 0.00D+00
 Coeff-Com:  0.118D-04-0.310D-03-0.234D-03-0.418D-03 0.545D-03 0.722D-02
 Coeff-Com:  0.971D-02-0.896D-02-0.516D-01-0.882D-01 0.247D-01 0.393D+00
 Coeff-Com:  0.714D+00
 Coeff:      0.118D-04-0.310D-03-0.234D-03-0.418D-03 0.545D-03 0.722D-02
 Coeff:      0.971D-02-0.896D-02-0.516D-01-0.882D-01 0.247D-01 0.393D+00
 Coeff:      0.714D+00
 Gap=     0.103 Goal=   None    Shift=    0.000
 Gap=     0.138 Goal=   None    Shift=    0.000
 RMSDP=1.65D-08 MaxDP=8.72D-07 DE=-1.22D-10 OVMax= 1.96D-06

 Cycle  14  Pass 1  IDiag  1:
 RMSU=  7.00D-09    CP:  1.00D+00  9.74D-01  3.83D-01  9.56D-01  1.15D+00
                    CP:  1.45D+00  1.58D+00  1.36D+00  1.14D+00  1.33D+00
                    CP:  1.25D+00  1.16D+00  1.01D+00
 E= -3263.12105348359     Delta-E=        0.000000000074 Rises=F Damp=F
 DIIS: error= 5.65D-08 at cycle  14 NSaved=  14.
 NSaved=14 IEnMin=13 EnMin= -3263.12105348367     IErMin=14 ErrMin= 5.65D-08
 ErrMax= 5.65D-08  0.00D+00 EMaxC= 1.00D-01 BMatC= 2.94D-12 BMatP= 3.66D-11
 IDIUse=1 WtCom= 1.00D+00 WtEn= 0.00D+00
 Coeff-Com:  0.411D-05-0.617D-04-0.546D-04-0.253D-03-0.442D-03 0.587D-04
 Coeff-Com:  0.308D-02 0.464D-02-0.219D-02-0.344D-01-0.400D-01 0.243D-01
 Coeff-Com:  0.217D+00 0.829D+00
 Coeff:      0.411D-05-0.617D-04-0.546D-04-0.253D-03-0.442D-03 0.587D-04
 Coeff:      0.308D-02 0.464D-02-0.219D-02-0.344D-01-0.400D-01 0.243D-01
 Coeff:      0.217D+00 0.829D+00
 Gap=     0.103 Goal=   None    Shift=    0.000
 Gap=     0.138 Goal=   None    Shift=    0.000
 RMSDP=5.67D-09 MaxDP=2.87D-07 DE= 7.37D-11 OVMax= 7.50D-07

 Error on total polarization charges =  0.01434
 SCF Done:  E(UB3LYP) =  -3263.12105348     A.U. after   14 cycles
            NFock= 14  Conv=0.57D-08     -V/T= 2.0018
 <Sx>= 0.0000 <Sy>= 0.0000 <Sz>= 0.5000 <S**2>= 0.7733 S= 0.5116
 <L.S>= 0.000000000000E+00
 KE= 3.257356455815D+03 PE=-1.053970795977D+04 EE= 2.628477037265D+03
 Annihilation of the first spin contaminant:
 S**2 before annihilation     0.7733,   after     0.7504
 Leave Link  502 at Fri Jan 10 13:03:28 2020, MaxMem=   134217728 cpu:      1115.0
 (Enter E:\Gaussian\G09W\l801.exe)
 DoSCS=F DFT=T ScalE2(SS,OS)=  1.000000  1.000000
 ExpMin= 1.03D-01 ExpMax= 4.40D+05 ExpMxC= 1.51D+04 IAcc=3 IRadAn=         5 AccDes= 0.00D+00
 HarFok:  IExCor=  205 AccDes= 0.00D+00 IRadAn=         5 IDoV=-2 UseB2=F ITyADJ=14
 ICtDFT= 12500011 ScaDFX=  1.000000  1.000000  1.000000  1.000000
 Largest valence mixing into a core orbital is  2.25D-04
 Largest core mixing into a valence orbital is  1.83D-05
 Largest valence mixing into a core orbital is  2.25D-04
 Largest core mixing into a valence orbital is  1.95D-05
 Range of M.O.s used for correlation:    31   356
 NBasis=   356 NAE=    72 NBE=    71 NFC=    30 NFV=     0
 NROrb=    326 NOA=    42 NOB=    41 NVA=   284 NVB=   285

 **** Warning!!: The largest alpha MO coefficient is  0.21431544D+02


 **** Warning!!: The largest beta MO coefficient is  0.21439925D+02

 Leave Link  801 at Fri Jan 10 13:03:30 2020, MaxMem=   134217728 cpu:         2.0
 (Enter E:\Gaussian\G09W\l914.exe)
 UHF ground state
 MDV=   134217728 DFT=T DoStab=F Mixed=T DoRPA=T DoScal=F NonHer=T
 NEqPCM:  Using equilibrium solvation (IEInf=0, Eps=  35.6880, EpsInf=   1.8069)
 Making orbital integer symmetry assigments:
 Orbital symmetries:
 Alpha Orbitals:
       Occupied  (A) (A) (A) (A) (A) (A) (A) (A) (A) (A) (A) (A)
                 (A) (A) (A) (A) (A) (A) (A) (A) (A) (A) (A) (A)
                 (A) (A) (A) (A) (A) (A) (A) (A) (A) (A) (A) (A)
                 (A) (A) (A) (A) (A) (A) (A) (A) (A) (A) (A) (A)
                 (A) (A) (A) (A) (A) (A) (A) (A) (A) (A) (A) (A)
                 (A) (A) (A) (A) (A) (A) (A) (A) (A) (A) (A) (A)
       Virtual   (A) (A) (A) (A) (A) (A) (A) (A) (A) (A) (A) (A)
                 (A) (A) (A) (A) (A) (A) (A) (A) (A) (A) (A) (A)
                 (A) (A) (A) (A) (A) (A) (A) (A) (A) (A) (A) (A)
                 (A) (A) (A) (A) (A) (A) (A) (A) (A) (A) (A) (A)
                 (A) (A) (A) (A) (A) (A) (A) (A) (A) (A) (A) (A)
                 (A) (A) (A) (A) (A) (A) (A) (A) (A) (A) (A) (A)
                 (A) (A) (A) (A) (A) (A) (A) (A) (A) (A) (A) (A)
                 (A) (A) (A) (A) (A) (A) (A) (A) (A) (A) (A) (A)
                 (A) (A) (A) (A) (A) (A) (A) (A) (A) (A) (A) (A)
                 (A) (A) (A) (A) (A) (A) (A) (A) (A) (A) (A) (A)
                 (A) (A) (A) (A) (A) (A) (A) (A) (A) (A) (A) (A)
                 (A) (A) (A) (A) (A) (A) (A) (A) (A) (A) (A) (A)
                 (A) (A) (A) (A) (A) (A) (A) (A) (A) (A) (A) (A)
                 (A) (A) (A) (A) (A) (A) (A) (A) (A) (A) (A) (A)
                 (A) (A) (A) (A) (A) (A) (A) (A) (A) (A) (A) (A)
                 (A) (A) (A) (A) (A) (A) (A) (A) (A) (A) (A) (A)
                 (A) (A) (A) (A) (A) (A) (A) (A) (A) (A) (A) (A)
                 (A) (A) (A) (A) (A) (A) (A) (A) (A) (A) (A) (A)
                 (A) (A) (A) (A) (A) (A) (A) (A) (A) (A) (A) (A)
                 (A) (A) (A) (A) (A) (A) (A) (A) (A) (A) (A) (A)
                 (A) (A) (A) (A) (A) (A) (A) (A) (A) (A) (A) (A)
                 (A) (A) (A) (A) (A) (A) (A) (A) (A) (A) (A) (A)
                 (A) (A) (A) (A) (A) (A) (A) (A) (A) (A) (A) (A)
                 (A) (A) (A) (A) (A) (A) (A) (A)
 Beta  Orbitals:
       Occupied  (A) (A) (A) (A) (A) (A) (A) (A) (A) (A) (A) (A)
                 (A) (A) (A) (A) (A) (A) (A) (A) (A) (A) (A) (A)
                 (A) (A) (A) (A) (A) (A) (A) (A) (A) (A) (A) (A)
                 (A) (A) (A) (A) (A) (A) (A) (A) (A) (A) (A) (A)
                 (A) (A) (A) (A) (A) (A) (A) (A) (A) (A) (A) (A)
                 (A) (A) (A) (A) (A) (A) (A) (A) (A) (A) (A)
       Virtual   (A) (A) (A) (A) (A) (A) (A) (A) (A) (A) (A) (A)
                 (A) (A) (A) (A) (A) (A) (A) (A) (A) (A) (A) (A)
                 (A) (A) (A) (A) (A) (A) (A) (A) (A) (A) (A) (A)
                 (A) (A) (A) (A) (A) (A) (A) (A) (A) (A) (A) (A)
                 (A) (A) (A) (A) (A) (A) (A) (A) (A) (A) (A) (A)
                 (A) (A) (A) (A) (A) (A) (A) (A) (A) (A) (A) (A)
                 (A) (A) (A) (A) (A) (A) (A) (A) (A) (A) (A) (A)
                 (A) (A) (A) (A) (A) (A) (A) (A) (A) (A) (A) (A)
                 (A) (A) (A) (A) (A) (A) (A) (A) (A) (A) (A) (A)
                 (A) (A) (A) (A) (A) (A) (A) (A) (A) (A) (A) (A)
                 (A) (A) (A) (A) (A) (A) (A) (A) (A) (A) (A) (A)
                 (A) (A) (A) (A) (A) (A) (A) (A) (A) (A) (A) (A)
                 (A) (A) (A) (A) (A) (A) (A) (A) (A) (A) (A) (A)
                 (A) (A) (A) (A) (A) (A) (A) (A) (A) (A) (A) (A)
                 (A) (A) (A) (A) (A) (A) (A) (A) (A) (A) (A) (A)
                 (A) (A) (A) (A) (A) (A) (A) (A) (A) (A) (A) (A)
                 (A) (A) (A) (A) (A) (A) (A) (A) (A) (A) (A) (A)
                 (A) (A) (A) (A) (A) (A) (A) (A) (A) (A) (A) (A)
                 (A) (A) (A) (A) (A) (A) (A) (A) (A) (A) (A) (A)
                 (A) (A) (A) (A) (A) (A) (A) (A) (A) (A) (A) (A)
                 (A) (A) (A) (A) (A) (A) (A) (A) (A) (A) (A) (A)
                 (A) (A) (A) (A) (A) (A) (A) (A) (A) (A) (A) (A)
                 (A) (A) (A) (A) (A) (A) (A) (A) (A) (A) (A) (A)
                 (A) (A) (A) (A) (A) (A) (A) (A) (A)
 Generating guess from densities on rwf.
 Convergence on wavefunction:    0.000001000000000
 Davidson Disk Diagonalization:  ConvIn= 1.00D-06 SkipCon=T Conv= 1.00D-06.
 Max sub-space:   200 roots to seek:     3 dimension of matrix:        23613
 Iteration     1 Dimension     6 NMult     0 NNew      6
 CISAX will form     6 AO SS matrices at one time.
 NMat=     6 NSing=     6 JSym2X= 0.
 FoFJK:  IHMeth= 1 ICntrl=       0 DoSepK=F KAlg= 0 I1Cent=   0 FoldK=F
 IRaf=         0 NMat=  12 IRICut=       1 DoRegI=T DoRafI=F ISym2E= 0.
 FoFCou: FMM=F IPFlag=           0 FMFlag=      100000 FMFlg1=           0
         NFxFlg=           0 DoJE=F BraDBF=F KetDBF=F FulRan=T
         wScrn=  0.000000 ICntrl=       0 IOpCl=  1 I1Cent=           0 NGrid=           0
         NMat0=   12 NMatS0=      6 NMatT0=    0 NMatD0=   12 NMtDS0=    0 NMtDT0=    0
 Symmetry not used in FoFCou.
 Excitation Energies [eV] at current iteration:
 Root      1 :     1.884500638644621
 Root      2 :     2.397842386625340
 Root      3 :     2.819061548272825
 Iteration     2 Dimension    12 NMult     6 NNew      6
 CISAX will form     6 AO SS matrices at one time.
 NMat=     6 NSing=     6 JSym2X= 0.
 Root      1 not converged, maximum delta is    0.032497892415973
 Root      2 not converged, maximum delta is    0.036107629591064
 Root      3 not converged, maximum delta is    0.009761703952558
 Excitation Energies [eV] at current iteration:
 Root      1 :     1.877874461281711   Change is   -0.006626177362910
 Root      2 :     2.388881814511866   Change is   -0.008960572113474
 Root      3 :     2.817928892409277   Change is   -0.001132655863548
 Iteration     3 Dimension    18 NMult    12 NNew      6
 CISAX will form     6 AO SS matrices at one time.
 NMat=     6 NSing=     6 JSym2X= 0.
 Root      1 not converged, maximum delta is    0.005884421429482
 Root      2 not converged, maximum delta is    0.006183070921722
 Root      3 not converged, maximum delta is    0.046266510226639
 Excitation Energies [eV] at current iteration:
 Root      1 :     1.877483744446652   Change is   -0.000390716835059
 Root      2 :     2.388568067833855   Change is   -0.000313746678012
 Root      3 :     2.814122353341664   Change is   -0.003806539067613
 Iteration     4 Dimension    24 NMult    18 NNew      6
 CISAX will form     6 AO SS matrices at one time.
 NMat=     6 NSing=     6 JSym2X= 0.
 Root      1 not converged, maximum delta is    0.002350014690650
 Root      2 not converged, maximum delta is    0.001018936629947
 Root      3 not converged, maximum delta is    0.083834674008106
 Excitation Energies [eV] at current iteration:
 Root      1 :     1.877390599091079   Change is   -0.000093145355573
 Root      2 :     2.388560257478177   Change is   -0.000007810355678
 Root      3 :     2.802774815317657   Change is   -0.011347538024007
 Iteration     5 Dimension    30 NMult    24 NNew      6
 CISAX will form     6 AO SS matrices at one time.
 NMat=     6 NSing=     6 JSym2X= 0.
 Root      1 not converged, maximum delta is    0.001390344390947
 Root      2 not converged, maximum delta is    0.000273466396183
 Root      3 not converged, maximum delta is    0.028430220472294
 Excitation Energies [eV] at current iteration:
 Root      1 :     1.877358293365173   Change is   -0.000032305725906
 Root      2 :     2.388559681525011   Change is   -0.000000575953167
 Root      3 :     2.799759696136854   Change is   -0.003015119180803
 Iteration     6 Dimension    36 NMult    30 NNew      6
 CISAX will form     6 AO SS matrices at one time.
 NMat=     6 NSing=     6 JSym2X= 0.
 Root      1 not converged, maximum delta is    0.000472366684437
 Root      2 not converged, maximum delta is    0.000024990850848
 Root      3 not converged, maximum delta is    0.012283466020866
 Excitation Energies [eV] at current iteration:
 Root      1 :     1.877346919431529   Change is   -0.000011373933644
 Root      2 :     2.388559643091404   Change is   -0.000000038433606
 Root      3 :     2.798711152069179   Change is   -0.001048544067675
 Iteration     7 Dimension    42 NMult    36 NNew      6
 CISAX will form     6 AO SS matrices at one time.
 NMat=     6 NSing=     6 JSym2X= 0.
 Root      1 not converged, maximum delta is    0.000233883615597
 Root      2 not converged, maximum delta is    0.000006973582901
 Root      3 not converged, maximum delta is    0.013464846970781
 Excitation Energies [eV] at current iteration:
 Root      1 :     1.877344830975471   Change is   -0.000002088456058
 Root      2 :     2.388559639451615   Change is   -0.000000003639790
 Root      3 :     2.798382995000149   Change is   -0.000328157069030
 Iteration     8 Dimension    48 NMult    42 NNew      6
 CISAX will form     6 AO SS matrices at one time.
 NMat=     6 NSing=     6 JSym2X= 0.
 Root      1 not converged, maximum delta is    0.000097070790907
 Root      2 not converged, maximum delta is    0.000001713028070
 Root      3 not converged, maximum delta is    0.009399152486320
 Excitation Energies [eV] at current iteration:
 Root      1 :     1.877344415518459   Change is   -0.000000415457013
 Root      2 :     2.388559639112089   Change is   -0.000000000339526
 Root      3 :     2.798221145383116   Change is   -0.000161849617033
 Iteration     9 Dimension    54 NMult    48 NNew      6
 CISAX will form     6 AO SS matrices at one time.
 NMat=     6 NSing=     6 JSym2X= 0.
 Root      1 not converged, maximum delta is    0.000030910188977
 Root      2 has converged.
 Root      3 not converged, maximum delta is    0.002307385024489
 Excitation Energies [eV] at current iteration:
 Root      1 :     1.877344376655322   Change is   -0.000000038863137
 Root      2 :     2.388559639073474   Change is   -0.000000000038616
 Root      3 :     2.798185093562511   Change is   -0.000036051820605
 Iteration    10 Dimension    58 NMult    54 NNew      4
 CISAX will form     4 AO SS matrices at one time.
 NMat=     4 NSing=     4 JSym2X= 0.
 Root      1 not converged, maximum delta is    0.000005497988266
 Root      2 has converged.
 Root      3 not converged, maximum delta is    0.000273179700774
 Excitation Energies [eV] at current iteration:
 Root      1 :     1.877344371853830   Change is   -0.000000004801492
 Root      2 :     2.388559639073267   Change is   -0.000000000000207
 Root      3 :     2.798180519709276   Change is   -0.000004573853235
 Iteration    11 Dimension    62 NMult    58 NNew      4
 CISAX will form     4 AO SS matrices at one time.
 NMat=     4 NSing=     4 JSym2X= 0.
 Root      1 not converged, maximum delta is    0.000001814104260
 Root      2 has converged.
 Root      3 not converged, maximum delta is    0.000099286923896
 Excitation Energies [eV] at current iteration:
 Root      1 :     1.877344371339744   Change is   -0.000000000514086
 Root      2 :     2.388559639074334   Change is    0.000000000001067
 Root      3 :     2.798179828806618   Change is   -0.000000690902658
 Iteration    12 Dimension    66 NMult    62 NNew      4
 CISAX will form     4 AO SS matrices at one time.
 NMat=     4 NSing=     4 JSym2X= 0.
 Root      1 has converged.
 Root      2 has converged.
 Root      3 not converged, maximum delta is    0.000035582793041
 Excitation Energies [eV] at current iteration:
 Root      1 :     1.877344371289343   Change is   -0.000000000050402
 Root      2 :     2.388559639073680   Change is   -0.000000000000654
 Root      3 :     2.798179718731931   Change is   -0.000000110074687
 Iteration    13 Dimension    68 NMult    66 NNew      2
 CISAX will form     2 AO SS matrices at one time.
 NMat=     2 NSing=     2 JSym2X= 0.
 Root      1 has converged.
 Root      2 has converged.
 Root      3 not converged, maximum delta is    0.000015597408730
 Excitation Energies [eV] at current iteration:
 Root      1 :     1.877344371285971   Change is   -0.000000000003372
 Root      2 :     2.388559639073714   Change is    0.000000000000034
 Root      3 :     2.798179703506656   Change is   -0.000000015225275
 Iteration    14 Dimension    70 NMult    68 NNew      2
 CISAX will form     2 AO SS matrices at one time.
 NMat=     2 NSing=     2 JSym2X= 0.
 Root      1 has converged.
 Root      2 has converged.
 Root      3 not converged, maximum delta is    0.000009892240957
 Excitation Energies [eV] at current iteration:
 Root      1 :     1.877344371285796   Change is   -0.000000000000175
 Root      2 :     2.388559639073336   Change is   -0.000000000000379
 Root      3 :     2.798179700370280   Change is   -0.000000003136376
 Iteration    15 Dimension    72 NMult    70 NNew      2
 CISAX will form     2 AO SS matrices at one time.
 NMat=     2 NSing=     2 JSym2X= 0.
 Root      1 has converged.
 Root      2 has converged.
 Root      3 not converged, maximum delta is    0.000004079197314
 Excitation Energies [eV] at current iteration:
 Root      1 :     1.877344371283869   Change is   -0.000000000001927
 Root      2 :     2.388559639073026   Change is   -0.000000000000310
 Root      3 :     2.798179699923279   Change is   -0.000000000447001
 Iteration    16 Dimension    74 NMult    72 NNew      2
 CISAX will form     2 AO SS matrices at one time.
 NMat=     2 NSing=     2 JSym2X= 0.
 Root      1 has converged.
 Root      2 has converged.
 Root      3 has converged.
 Excitation Energies [eV] at current iteration:
 Root      1 :     1.877344371282643   Change is   -0.000000000001226
 Root      2 :     2.388559639072682   Change is   -0.000000000000344
 Root      3 :     2.798179699881620   Change is   -0.000000000041659
 Convergence achieved on expansion vectors.
 ***********************************************************************
 Excited states from <AA,BB:AA,BB> singles matrix:
 ***********************************************************************
 
 ExtSpn:  IState=     1 X2= 1.009 Y2= 0.009 X2-Y2-1= 2.00D-15
          S2Grnd=  0.773 Ra=  0.005 Rb=  0.007 T=  0.000 S2Ext=  0.011 S2=  0.785
 ExtSpn:  IState=     2 X2= 1.002 Y2= 0.002 X2-Y2-1= 6.66D-16
          S2Grnd=  0.773 Ra=  0.014 Rb=  0.170 T=  0.099 S2Ext=  0.282 S2=  1.056
 ExtSpn:  IState=     3 X2= 1.012 Y2= 0.012 X2-Y2-1=-1.11D-16
          S2Grnd=  0.773 Ra=  0.044 Rb=  0.057 T=  0.094 S2Ext=  0.195 S2=  0.968
 1PDM for each excited state written to RWF  633
 Ground to excited state transition densities written to RWF  633
 Ground to excited state transition electric dipole moments (Au):
       state          X           Y           Z        Dip. S.      Osc.
         1         0.0688     -0.7792      0.0000      0.6119      0.0281
         2         0.0000      0.0000     -0.0007      0.0000      0.0000
         3        -0.7454      0.2715      0.0000      0.6294      0.0431
 Ground to excited state transition velocity dipole moments (Au):
       state          X           Y           Z        Dip. S.      Osc.
         1        -0.0078      0.0652      0.0000      0.0043      0.0417
         2         0.0000      0.0000      0.0001      0.0000      0.0000
         3         0.0782     -0.0281      0.0000      0.0069      0.0448
 Ground to excited state transition magnetic dipole moments (Au):
       state          X           Y           Z
         1         0.0000      0.0000     -0.1716
         2         0.0788     -0.3660      0.0000
         3         0.0000      0.0000     -0.4290
 Ground to excited state transition velocity quadrupole moments (Au):
       state          XX          YY          ZZ          XY          XZ          YZ
         1        -0.0059      0.0513      0.0006     -0.1943      0.0000      0.0000
         2         0.0000      0.0000      0.0000      0.0000      0.0082      0.0015
         3         0.0214     -0.1281      0.0074     -0.0187      0.0000      0.0000
 <0|del|b> * <b|rxdel|0> + <0|del|b> * <b|delr+rdel|0>
 Rotatory Strengths (R) in cgs (10**-40 erg-esu-cm/Gauss)
       state          XX          YY          ZZ    R(velocity)    E-M Angle
         1         0.0029     -0.0004      0.0019      0.0015       90.00
         2        -0.0004      0.0000     -0.0004     -0.0003       90.00
         3        -0.0001     -0.0010     -0.0001     -0.0004       90.00
 1/2[<0|r|b>*<b|rxdel|0> + (<0|rxdel|b>*<b|r|0>)*]
 Rotatory Strengths (R) in cgs (10**-40 erg-esu-cm/Gauss)
       state          XX          YY          ZZ     R(length)
         1        -0.0003      0.0039      0.0000      0.0012
         2         0.0000     -0.0005      0.0000     -0.0002
         3        -0.0011      0.0001     -0.0002     -0.0004
  1/2[<0|del|b>*<b|r|0> + (<0|r|b>*<b|del|0>)*] (Au)
       state          X           Y           Z        Dip. S.   Osc.(frdel)
         1        -0.0005     -0.0508      0.0000      0.0514      0.0343
         2         0.0000      0.0000      0.0000      0.0000      0.0000
         3        -0.0583     -0.0076      0.0000      0.0659      0.0440

 Excitation energies and oscillator strengths:
 
 Excited State   1:  2.034-A      1.8773 eV  660.42 nm  f=0.0281  <S**2>=0.785
     72A -> 73A        0.97350
     69B -> 72B       -0.12204
     71B -> 72B        0.14809
 This state for optimization and/or second-order correction.
 Total Energy, E(TD-HF/TD-KS) =  -3263.05206234    
 Copying the excited state density for this state as the 1-particle RhoCI density.
 
 Excited State   2:  2.285-A      2.3886 eV  519.08 nm  f=0.0000  <S**2>=1.056
     70A -> 73A       -0.11393
     70B -> 72B        0.94532
     70B -> 73B        0.27385
     70B -> 79B       -0.11505
 
 Excited State   3:  2.208-A      2.7982 eV  443.09 nm  f=0.0431  <S**2>=0.968
     71A -> 73A       -0.12271
     72A -> 74A        0.47078
     68B -> 72B       -0.25385
     68B -> 73B        0.11800
     69B -> 72B        0.24900
     71B -> 72B        0.74547
 SavETr:  write IOETrn=   770 NScale= 10 NData=  16 NLR=1 NState=    3 LETran=      62.
 The state does not have a specific multiplicity.
 CISAX will form     1 AO SS matrices at one time.
 NMat=     1 NSing=     1 JSym2X= 0.
 GePol: Maximum number of non-zero 1st derivatives   =     349
 CISAX will form     1 AO SS matrices at one time.
 NMat=     1 NSing=     1 JSym2X= 0.
 Leave Link  914 at Fri Jan 10 14:22:21 2020, MaxMem=   134217728 cpu:      4730.0
 (Enter E:\Gaussian\G09W\l1002.exe)
 Minotr:  UHF open shell wavefunction.
          Computing CIS/TD-HF/TD-KS derivatives.
          Using Z-Vector for PSCF gradient.
          Skipping F1 and S1 gradient terms here.
          IDoAtm=1111111111111111111111111
 NEqPCM:  Using equilibrium solvation (IEInf=0, Eps=  35.6880, EpsInf=   1.8069)
          Frozen-core window.
          Direct CPHF calculation.
          Differentiating once with respect to electric field.
                with respect to dipole field.
          Differentiating once with respect to nuclear coordinates.
          Requested convergence is 1.0D-10 RMS, and 1.0D-09 maximum.
          NewPWx=F KeepS1=T KeepF1=T KeepIn=T MapXYZ=F SortEE=F KeepMc=T.
          MDV=     134217222 using IRadAn=       0.
 Using stored XC quadrature information.
          Solving linear equations separately, MaxMat=       0.
          There are     1 degrees of freedom in the 1st order CPHF.  IDoFFX=0 NUNeed=     1.
 FoFJK:  IHMeth= 1 ICntrl=       0 DoSepK=F KAlg= 0 I1Cent=   0 FoldK=F
 IRaf= 800000000 NMat=   1 IRICut=       1 DoRegI=T DoRafI=F ISym2E=-1.
 FoFCou: FMM=F IPFlag=           0 FMFlag=      100000 FMFlg1=           0
         NFxFlg=           0 DoJE=F BraDBF=F KetDBF=F FulRan=T
         wScrn=  0.000000 ICntrl=       0 IOpCl=  1 I1Cent=           0 NGrid=           0
         NMat0=    1 NMatS0=      1 NMatT0=    0 NMatD0=    1 NMtDS0=    0 NMtDT0=    0
 Petite list used in FoFCou.
 LinEq1:  Iter=  0 NonCon=     1 RMS=2.57D-03 Max=2.28D-01 NDo=     1
 AX will form     1 AO Fock derivatives at one time.
 LinEq1:  Iter=  1 NonCon=     1 RMS=1.90D-03 Max=1.57D-01 NDo=     1
 LinEq1:  Iter=  2 NonCon=     1 RMS=9.69D-04 Max=5.06D-02 NDo=     1
 LinEq1:  Iter=  3 NonCon=     1 RMS=7.35D-04 Max=3.80D-02 NDo=     1
 LinEq1:  Iter=  4 NonCon=     1 RMS=5.78D-04 Max=2.91D-02 NDo=     1
 LinEq1:  Iter=  5 NonCon=     1 RMS=3.69D-04 Max=1.97D-02 NDo=     1
 LinEq1:  Iter=  6 NonCon=     1 RMS=3.08D-04 Max=1.59D-02 NDo=     1
 LinEq1:  Iter=  7 NonCon=     1 RMS=1.93D-04 Max=1.19D-02 NDo=     1
 LinEq1:  Iter=  8 NonCon=     1 RMS=1.52D-04 Max=1.22D-02 NDo=     1
 LinEq1:  Iter=  9 NonCon=     1 RMS=7.74D-05 Max=3.63D-03 NDo=     1
 LinEq1:  Iter= 10 NonCon=     1 RMS=4.98D-05 Max=2.41D-03 NDo=     1
 LinEq1:  Iter= 11 NonCon=     1 RMS=2.93D-05 Max=1.11D-03 NDo=     1
 LinEq1:  Iter= 12 NonCon=     1 RMS=1.63D-05 Max=7.53D-04 NDo=     1
 LinEq1:  Iter= 13 NonCon=     1 RMS=1.08D-05 Max=4.93D-04 NDo=     1
 LinEq1:  Iter= 14 NonCon=     1 RMS=7.25D-06 Max=3.54D-04 NDo=     1
 LinEq1:  Iter= 15 NonCon=     1 RMS=4.31D-06 Max=2.18D-04 NDo=     1
 LinEq1:  Iter= 16 NonCon=     1 RMS=2.45D-06 Max=1.15D-04 NDo=     1
 LinEq1:  Iter= 17 NonCon=     1 RMS=1.89D-06 Max=6.95D-05 NDo=     1
 LinEq1:  Iter= 18 NonCon=     1 RMS=8.09D-07 Max=3.25D-05 NDo=     1
 LinEq1:  Iter= 19 NonCon=     1 RMS=5.09D-07 Max=1.86D-05 NDo=     1
 LinEq1:  Iter= 20 NonCon=     1 RMS=2.52D-07 Max=1.01D-05 NDo=     1
 LinEq1:  Iter= 21 NonCon=     1 RMS=1.51D-07 Max=5.84D-06 NDo=     1
 LinEq1:  Iter= 22 NonCon=     1 RMS=7.38D-08 Max=3.84D-06 NDo=     1
 LinEq1:  Iter= 23 NonCon=     1 RMS=4.26D-08 Max=1.86D-06 NDo=     1
 LinEq1:  Iter= 24 NonCon=     1 RMS=2.81D-08 Max=1.19D-06 NDo=     1
 LinEq1:  Iter= 25 NonCon=     1 RMS=1.28D-08 Max=6.50D-07 NDo=     1
 LinEq1:  Iter= 26 NonCon=     1 RMS=1.04D-08 Max=3.10D-07 NDo=     1
 LinEq1:  Iter= 27 NonCon=     1 RMS=4.64D-09 Max=1.84D-07 NDo=     1
 LinEq1:  Iter= 28 NonCon=     1 RMS=2.61D-09 Max=9.21D-08 NDo=     1
 LinEq1:  Iter= 29 NonCon=     1 RMS=1.68D-09 Max=5.53D-08 NDo=     1
 LinEq1:  Iter= 30 NonCon=     1 RMS=6.48D-10 Max=2.88D-08 NDo=     1
 LinEq1:  Iter= 31 NonCon=     1 RMS=2.59D-10 Max=1.32D-08 NDo=     1
 LinEq1:  Iter= 32 NonCon=     1 RMS=1.81D-10 Max=1.01D-08 NDo=     1
 LinEq1:  Iter= 33 NonCon=     1 RMS=5.94D-11 Max=1.75D-09 NDo=     1
 LinEq1:  Iter= 34 NonCon=     0 RMS=2.14D-11 Max=5.09D-10 NDo=     1
 Linear equations converged to 1.000D-10 1.000D-09 after    34 iterations.
 End of Minotr F.D. properties file   721 does not exist.
 End of Minotr F.D. properties file   722 does not exist.
 End of Minotr F.D. properties file   788 does not exist.
 Leave Link 1002 at Fri Jan 10 15:17:27 2020, MaxMem=   134217728 cpu:      3305.0
 (Enter E:\Gaussian\G09W\l701.exe)
 Compute integral first derivatives.
 ... and contract with generalized density number  6.
 R6Disp: Adding Grimme-D3(BJ) dispersion energy 1st derivatives to the gradient.
 D1PCM: PCM CHGder 1st derivatives, ID1Alg=3 FixD1E=F DoIter=F DoCFld=F I1PDM=6.
 Leave Link  701 at Fri Jan 10 15:18:15 2020, MaxMem=   134217728 cpu:        48.0
 (Enter E:\Gaussian\G09W\l702.exe)
 L702 exits ... SP integral derivatives will be done elsewhere.
 Leave Link  702 at Fri Jan 10 15:18:15 2020, MaxMem=   134217728 cpu:         0.0
 (Enter E:\Gaussian\G09W\l703.exe)
 Compute integral first derivatives, UseDBF=F ICtDFT=           0.
 Integral derivatives from FoFJK, PRISM(SPDF).
 Calling FoFJK, ICntrl=  10005127 FMM=F ISym2X=0 I1Cent= 0 IOpClX= 1 NMat=1 NMatS=1 NMatT=0.
 FoFJK:  IHMeth= 1 ICntrl=10005127 DoSepK=F KAlg= 0 I1Cent=   0 FoldK=F
 IRaf=         0 NMat=   1 IRICut=       1 DoRegI=T DoRafI=F ISym2E= 0.
 FoFCou: FMM=F IPFlag=           0 FMFlag=      100000 FMFlg1=         800
         NFxFlg=           0 DoJE=F BraDBF=F KetDBF=F FulRan=T
         wScrn=  0.000000 ICntrl=10005127 IOpCl=  1 I1Cent=           0 NGrid=           0
         NMat0=    1 NMatS0=      1 NMatT0=    0 NMatD0=    1 NMtDS0=    0 NMtDT0=    0
 Symmetry not used in FoFCou.
 Leave Link  703 at Fri Jan 10 15:22:39 2020, MaxMem=   134217728 cpu:       263.0
 (Enter E:\Gaussian\G09W\l716.exe)
 Dipole        =-1.38995844D+00-3.08444728D+00 5.39848751D-05
 ***** Axes restored to original set *****
 -------------------------------------------------------------------
 Center     Atomic                   Forces (Hartrees/Bohr)
 Number     Number              X              Y              Z
 -------------------------------------------------------------------
      1        6           0.000590038   -0.007068573    0.000000075
      2        6           0.004589108    0.003020616    0.000000002
      3        6          -0.001709229    0.004079308    0.000000261
      4        6          -0.009335635   -0.002768775    0.000000524
      5        6           0.010053757    0.000561412   -0.000000420
      6        6          -0.006396689    0.005434932   -0.000000063
      7        1           0.000022059    0.000889120   -0.000000101
      8        1          -0.000746184   -0.000257882    0.000000068
      9        1          -0.000890309   -0.000189481    0.000000346
     10        1           0.000793455   -0.000210213    0.000000071
     11        6           0.003742753   -0.010786649   -0.000001114
     12        6           0.003003596   -0.008170159   -0.000000781
     13        6           0.010641456    0.001789159   -0.000000321
     14        6          -0.001648233    0.004107629    0.000000515
     15        6          -0.010319588   -0.004600457    0.000000025
     16        6          -0.005420201    0.001466981   -0.000000013
     17        6           0.005357135    0.009486674   -0.000000098
     18        1           0.000654332    0.000223845   -0.000000109
     19        6           0.002213592   -0.008116818    0.000000094
     20        1           0.000697214   -0.000058618    0.000000012
     21        1          -0.000387704    0.000909994   -0.000000025
     22       35          -0.001377063   -0.000520840   -0.000000005
     23        8          -0.001329509    0.004386917    0.000000239
     24        8          -0.003249580    0.008099970    0.000001887
     25        1           0.000451430   -0.001708092   -0.000001071
 -------------------------------------------------------------------
 Cartesian Forces:  Max     0.010786649 RMS     0.003941055
 Leave Link  716 at Fri Jan 10 15:22:40 2020, MaxMem=   134217728 cpu:         0.0
 (Enter E:\Gaussian\G09W\l103.exe)

 GradGradGradGradGradGradGradGradGradGradGradGradGradGradGradGradGradGrad
 Berny optimization.
 Using GEDIIS/GDIIS optimizer.
 FormGI is forming the generalized inverse of G from B-inverse, IUseBI=4.
 Internal  Forces:  Max     0.006909660 RMS     0.001601433
 Search for a local minimum.
 Step number   2 out of a maximum of  146
 All quantities printed in internal units (Hartrees-Bohrs-Radians)
 RMS Force = .16014D-02 SwitMx=.10000D-02 MixMth= 1
 Mixed Optimization -- RFO/linear search
 Update second derivatives using D2CorX and points    1    2
 DE= -4.60D-03 DEPred=-3.79D-03 R= 1.21D+00
 TightC=F SS=  1.41D+00  RLast= 1.35D-01 DXNew= 5.0454D-01 4.0593D-01
 Trust test= 1.21D+00 RLast= 1.35D-01 DXMaxT set to 4.06D-01
 ITU=  1  0
 Use linear search instead of GDIIS.
     Eigenvalues ---    0.01151   0.01348   0.01639   0.01707   0.01732
     Eigenvalues ---    0.01777   0.01839   0.01859   0.01881   0.02059
     Eigenvalues ---    0.02086   0.02104   0.02117   0.02148   0.02170
     Eigenvalues ---    0.02185   0.02198   0.02207   0.02218   0.02248
     Eigenvalues ---    0.02272   0.02389   0.15665   0.16000   0.16000
     Eigenvalues ---    0.16000   0.16000   0.16000   0.16000   0.16017
     Eigenvalues ---    0.17402   0.20934   0.22157   0.22572   0.23513
     Eigenvalues ---    0.24152   0.24523   0.24813   0.25000   0.25000
     Eigenvalues ---    0.25000   0.25000   0.26175   0.33009   0.34686
     Eigenvalues ---    0.35404   0.35507   0.35536   0.35637   0.35647
     Eigenvalues ---    0.35725   0.35931   0.36790   0.37444   0.39925
     Eigenvalues ---    0.40659   0.41064   0.41570   0.42618   0.43529
     Eigenvalues ---    0.44190   0.44671   0.47369   0.47577   0.48680
     Eigenvalues ---    0.49895   0.54425   0.54619   0.86942
 RFO step:  Lambda=-8.03310504D-04 EMin= 1.15140507D-02
 Quartic linear search produced a step of  0.30192.
 Iteration  1 RMS(Cart)=  0.00549636 RMS(Int)=  0.00005593
 Iteration  2 RMS(Cart)=  0.00006305 RMS(Int)=  0.00001026
 Iteration  3 RMS(Cart)=  0.00000000 RMS(Int)=  0.00001026
 ITry= 1 IFail=0 DXMaxC= 2.77D-02 DCOld= 1.00D+10 DXMaxT= 4.06D-01 DXLimC= 3.00D+00 Rises=F
 Variable       Old X    -DE/DX   Delta X   Delta X   Delta X     New X
                                 (Linear)    (Quad)   (Total)
    R1        2.64988   0.00242   0.01057  -0.00052   0.01005   2.65993
    R2        2.62693  -0.00377  -0.00827  -0.00535  -0.01363   2.61329
    R3        2.04862   0.00026   0.00016   0.00083   0.00098   2.04961
    R4        2.64237  -0.00278  -0.00123  -0.00725  -0.00846   2.63390
    R5        2.04509  -0.00011  -0.00044  -0.00011  -0.00054   2.04455
    R6        2.68502   0.00196  -0.00286   0.00796   0.00511   2.69014
    R7        2.78617  -0.00189   0.00127  -0.00849  -0.00722   2.77895
    R8        2.66199  -0.00517  -0.00464  -0.01251  -0.01716   2.64484
    R9        2.70705   0.00392   0.00388   0.01035   0.01423   2.72128
   R10        2.64363   0.00442   0.01096   0.00459   0.01553   2.65916
   R11        2.05078   0.00003   0.00016  -0.00001   0.00015   2.05093
   R12        2.04737  -0.00045  -0.00031  -0.00144  -0.00176   2.04561
   R13        2.70900   0.00399   0.00506   0.00971   0.01476   2.72375
   R14        2.50150  -0.00691  -0.01345  -0.00731  -0.02075   2.48074
   R15        2.77508  -0.00273  -0.00060  -0.01028  -0.01087   2.76421
   R16        2.36207   0.00457   0.00671   0.00240   0.00911   2.37117
   R17        2.67679   0.00172  -0.00198   0.00639   0.00443   2.68122
   R18        2.65795  -0.00578  -0.00502  -0.01408  -0.01910   2.63884
   R19        2.65012  -0.00248   0.00086  -0.00779  -0.00691   2.64321
   R20        2.64455   0.00537   0.01292   0.00564   0.01854   2.66309
   R21        2.04177  -0.00009  -0.00004  -0.00030  -0.00034   2.04143
   R22        2.64640   0.00298   0.01015   0.00127   0.01142   2.65782
   R23        2.04471  -0.00021  -0.00049  -0.00043  -0.00092   2.04378
   R24        2.62377  -0.00461  -0.00897  -0.00726  -0.01625   2.60752
   R25        3.62689  -0.00114   0.00095  -0.00912  -0.00817   3.61872
   R26        2.04584   0.00030   0.00024   0.00093   0.00117   2.04701
   R27        1.82814   0.00069   0.00161   0.00058   0.00219   1.83033
    A1        2.10383   0.00115   0.00453   0.00395   0.00847   2.11230
    A2        2.09435  -0.00146  -0.00147  -0.00968  -0.01114   2.08321
    A3        2.08501   0.00031  -0.00306   0.00573   0.00267   2.08768
    A4        2.11046  -0.00117  -0.00088  -0.00650  -0.00736   2.10309
    A5        2.11732  -0.00021   0.00123  -0.00373  -0.00251   2.11481
    A6        2.05541   0.00138  -0.00035   0.01023   0.00987   2.06528
    A7        2.07292  -0.00006  -0.00429   0.00287  -0.00139   2.07153
    A8        2.09622  -0.00017   0.00617  -0.00441   0.00174   2.09796
    A9        2.11404   0.00023  -0.00188   0.00154  -0.00035   2.11370
   A10        2.08660   0.00154   0.00668   0.00290   0.00958   2.09619
   A11        2.05872  -0.00098  -0.00677   0.00070  -0.00607   2.05265
   A12        2.13786  -0.00056   0.00009  -0.00360  -0.00351   2.13435
   A13        2.10929  -0.00113  -0.00038  -0.00581  -0.00621   2.10308
   A14        2.11561   0.00150  -0.00004   0.01066   0.01063   2.12624
   A15        2.05829  -0.00037   0.00042  -0.00484  -0.00442   2.05387
   A16        2.08327  -0.00033  -0.00566   0.00260  -0.00309   2.08018
   A17        2.10232   0.00086   0.00235   0.00465   0.00702   2.10934
   A18        2.09760  -0.00053   0.00331  -0.00725  -0.00393   2.09367
   A19        2.15415  -0.00078   0.01013  -0.00874   0.00139   2.15554
   A20        2.12460   0.00063  -0.00614   0.00635   0.00021   2.12481
   A21        2.00443   0.00015  -0.00399   0.00239  -0.00160   2.00283
   A22        2.06124   0.00203   0.00742   0.00314   0.01057   2.07181
   A23        2.11038  -0.00147  -0.00412  -0.00366  -0.00778   2.10260
   A24        2.11157  -0.00056  -0.00330   0.00052  -0.00279   2.10878
   A25        2.07040  -0.00086  -0.00698   0.00131  -0.00568   2.06472
   A26        2.10971  -0.00124   0.00066  -0.00729  -0.00664   2.10307
   A27        2.10308   0.00210   0.00632   0.00598   0.01231   2.11539
   A28        2.10782   0.00036  -0.00192   0.00206   0.00013   2.10795
   A29        2.10533   0.00008   0.00575  -0.00264   0.00308   2.10842
   A30        2.07003  -0.00044  -0.00383   0.00058  -0.00322   2.06682
   A31        2.07946  -0.00122  -0.00074  -0.00628  -0.00705   2.07241
   A32        2.08963   0.00130   0.00037   0.00876   0.00915   2.09878
   A33        2.11410  -0.00009   0.00037  -0.00248  -0.00210   2.11200
   A34        2.11386  -0.00123  -0.00123  -0.00656  -0.00776   2.10610
   A35        2.06313   0.00130  -0.00006   0.00933   0.00926   2.07239
   A36        2.10619  -0.00008   0.00129  -0.00277  -0.00150   2.10469
   A37        2.11584  -0.00057  -0.00476   0.00082  -0.00398   2.11186
   A38        2.08293  -0.00142   0.00074  -0.00816  -0.00740   2.07553
   A39        2.08441   0.00200   0.00402   0.00734   0.01138   2.09580
   A40        2.08410   0.00136   0.00425   0.00546   0.00970   2.09380
   A41        2.10476  -0.00163  -0.00141  -0.01096  -0.01236   2.09240
   A42        2.09432   0.00028  -0.00284   0.00549   0.00266   2.09698
   A43        1.95576   0.00297  -0.00012   0.02413   0.02401   1.97977
    D1       -0.00001   0.00000   0.00000   0.00000   0.00000   0.00000
    D2        3.14158   0.00000   0.00000   0.00000   0.00000   3.14159
    D3        3.14159   0.00000   0.00000   0.00000   0.00000   3.14159
    D4       -0.00001   0.00000   0.00000   0.00000   0.00000   0.00000
    D5        0.00000   0.00000   0.00000   0.00000   0.00000   0.00000
    D6       -3.14158   0.00000   0.00000   0.00000  -0.00001  -3.14159
    D7       -3.14159   0.00000   0.00000   0.00000   0.00000  -3.14159
    D8        0.00001   0.00000   0.00000   0.00000  -0.00001   0.00000
    D9        0.00000   0.00000   0.00000   0.00000   0.00000   0.00000
   D10        3.14158   0.00000   0.00000   0.00000   0.00000   3.14159
   D11       -3.14159   0.00000   0.00000   0.00000   0.00000   3.14159
   D12       -0.00001   0.00000   0.00000   0.00000   0.00000  -0.00001
   D13        0.00001   0.00000   0.00000   0.00000   0.00000   0.00001
   D14       -3.14158   0.00000   0.00000   0.00000   0.00000  -3.14158
   D15       -3.14158   0.00000   0.00000   0.00000   0.00000  -3.14158
   D16        0.00002   0.00000   0.00000   0.00000   0.00000   0.00002
   D17       -3.14158   0.00000   0.00000  -0.00001  -0.00001  -3.14159
   D18        0.00000   0.00000   0.00000   0.00002   0.00002   0.00001
   D19        0.00001   0.00000   0.00000  -0.00001  -0.00001   0.00000
   D20        3.14158   0.00000   0.00000   0.00002   0.00002  -3.14158
   D21       -0.00001   0.00000   0.00000   0.00000   0.00000  -0.00001
   D22        3.14156   0.00000   0.00000   0.00001   0.00001   3.14157
   D23        3.14158   0.00000   0.00000   0.00000   0.00000   3.14158
   D24       -0.00003   0.00000   0.00000   0.00001   0.00001  -0.00002
   D25       -0.00003   0.00000   0.00000   0.00001   0.00001  -0.00003
   D26        3.14158   0.00000   0.00000  -0.00002  -0.00001   3.14156
   D27        3.14156   0.00000   0.00000   0.00001   0.00001   3.14157
   D28       -0.00001   0.00000   0.00000  -0.00001  -0.00001  -0.00003
   D29        0.00000   0.00000   0.00000   0.00000   0.00000   0.00000
   D30        3.14159   0.00000   0.00000   0.00000   0.00000  -3.14159
   D31       -3.14157   0.00000   0.00000  -0.00001  -0.00001  -3.14158
   D32        0.00002   0.00000   0.00000  -0.00001  -0.00001   0.00001
   D33        0.00002   0.00000   0.00000   0.00000   0.00000   0.00002
   D34       -3.14158   0.00000   0.00000   0.00000   0.00000  -3.14158
   D35       -3.14159   0.00000   0.00000   0.00002   0.00002  -3.14157
   D36        0.00000   0.00000   0.00000   0.00002   0.00002   0.00002
   D37       -0.00009   0.00000   0.00001   0.00004   0.00006  -0.00004
   D38        3.14151   0.00000   0.00002   0.00002   0.00004   3.14155
   D39       -0.00002   0.00000   0.00000   0.00001   0.00001  -0.00001
   D40        3.14158   0.00000   0.00000   0.00001   0.00001   3.14159
   D41        3.14159   0.00000   0.00000  -0.00002  -0.00001   3.14158
   D42        0.00000   0.00000   0.00001  -0.00002  -0.00002  -0.00001
   D43        0.00001   0.00000   0.00000  -0.00001  -0.00001   0.00000
   D44        3.14159   0.00000   0.00000   0.00000   0.00000   3.14159
   D45       -3.14158   0.00000   0.00000  -0.00001  -0.00001  -3.14159
   D46        0.00000   0.00000   0.00000   0.00000   0.00000   0.00000
   D47       -3.14159   0.00000   0.00000   0.00000   0.00000  -3.14159
   D48        0.00000   0.00000   0.00000   0.00000   0.00000   0.00000
   D49        0.00000   0.00000   0.00000   0.00000   0.00000   0.00000
   D50        3.14159   0.00000   0.00000   0.00000   0.00000   3.14159
   D51        3.14158   0.00000   0.00000   0.00001   0.00001   3.14159
   D52       -0.00001   0.00000   0.00000   0.00000   0.00001   0.00000
   D53        0.00000   0.00000   0.00000   0.00000   0.00000   0.00000
   D54       -3.14159   0.00000   0.00000   0.00000   0.00000  -3.14159
   D55        0.00000   0.00000   0.00000   0.00000   0.00000   0.00000
   D56       -3.14159   0.00000   0.00000   0.00000   0.00000  -3.14159
   D57       -3.14159   0.00000   0.00000   0.00000   0.00000  -3.14159
   D58        0.00000   0.00000   0.00000   0.00000   0.00000   0.00000
   D59        0.00000   0.00000   0.00000   0.00000   0.00000   0.00000
   D60       -3.14159   0.00000   0.00000   0.00000   0.00000   3.14159
   D61        3.14159   0.00000   0.00000   0.00000   0.00000   3.14159
   D62        0.00000   0.00000   0.00000   0.00000   0.00000   0.00000
   D63        0.00000   0.00000   0.00000   0.00000   0.00000   0.00000
   D64        3.14159   0.00000   0.00000   0.00000   0.00000   3.14159
   D65       -3.14159   0.00000   0.00000   0.00000   0.00000  -3.14159
   D66        0.00000   0.00000   0.00000   0.00000   0.00000   0.00000
         Item               Value     Threshold  Converged?
 Maximum Force            0.006910     0.000450     NO 
 RMS     Force            0.001601     0.000300     NO 
 Maximum Displacement     0.027700     0.001800     NO 
 RMS     Displacement     0.005509     0.001200     NO 
 Predicted change in Energy=-6.689579D-04
 Lowest energy point so far.  Saving SCF results.
 GradGradGradGradGradGradGradGradGradGradGradGradGradGradGradGradGradGrad

 Leave Link  103 at Fri Jan 10 15:22:40 2020, MaxMem=   134217728 cpu:         0.0
 (Enter E:\Gaussian\G09W\l202.exe)
                          Input orientation:                          
 ---------------------------------------------------------------------
 Center     Atomic      Atomic             Coordinates (Angstroms)
 Number     Number       Type             X           Y           Z
 ---------------------------------------------------------------------
      1          6           0       -5.079209    0.056737   -0.000004
      2          6           0       -4.038039    1.003960    0.000003
      3          6           0       -2.706618    0.591648    0.000002
      4          6           0       -2.423210   -0.803416   -0.000004
      5          6           0       -3.470044   -1.732385   -0.000019
      6          6           0       -4.808972   -1.299497   -0.000017
      7          1           0       -6.108685    0.398124   -0.000001
      8          1           0       -4.246804    2.065555    0.000008
      9          1           0       -3.286032   -2.801976   -0.000042
     10          1           0       -5.611836   -2.025580   -0.000025
     11          6           0       -1.039824   -1.203356    0.000012
     12          6           0       -1.623961    1.586831    0.000000
     13          6           0        0.058276   -0.269726    0.000000
     14          6           0       -0.238462    1.117738   -0.000005
     15          6           0        1.377570   -0.727367    0.000002
     16          6           0        0.825266    2.025984   -0.000008
     17          6           0        2.422717    0.217960   -0.000004
     18          1           0        1.585925   -1.787360    0.000007
     19          6           0        2.156392    1.571857   -0.000009
     20          1           0        0.604978    3.084836   -0.000009
     21          1           0        2.970477    2.286460   -0.000013
     22         35           0        4.233856   -0.403958   -0.000005
     23          8           0       -1.887399    2.813637    0.000014
     24          8           0       -0.686399   -2.467639    0.000042
     25          1           0       -1.438579   -3.077847    0.000084
 ---------------------------------------------------------------------
                    Distance matrix (angstroms):
                    1          2          3          4          5
     1  C    0.000000
     2  C    1.407575   0.000000
     3  C    2.432142   1.393802   0.000000
     4  C    2.791808   2.423692   1.423560   0.000000
     5  C    2.406318   2.794674   2.446211   1.399587   0.000000
     6  C    1.382894   2.429043   2.827776   2.436792   1.407167
     7  H    1.084605   2.157455   3.407567   3.876393   3.391385
     8  H    2.174454   1.081927   2.131801   3.399484   3.876558
     9  H    3.374570   3.879519   3.442732   2.176856   1.085305
    10  H    2.149357   3.413935   3.910265   3.414823   2.161767
    11  C    4.231367   3.723109   2.449539   1.440038   2.487136
    12  C    3.778879   2.483447   1.470556   2.520334   3.798055
    13  C    5.147846   4.289764   2.895963   2.538228   3.819478
    14  C    4.955659   3.801281   2.523602   2.909289   4.308866
    15  C    6.504215   5.685624   4.291899   3.801541   4.950700
    16  C    6.224208   4.969535   3.812024   4.307913   5.707454
    17  C    7.503658   6.508392   5.142929   4.952396   6.207131
    18  H    6.915540   6.278570   4.907709   4.128112   5.056268
    19  C    7.392530   6.220409   4.960814   5.158942   6.524937
    20  H    6.440448   5.087992   4.145197   4.928330   6.309630
    21  H    8.352790   7.124893   5.924677   6.216044   7.591537
    22  Br   9.324452   8.390857   7.011520   6.669040   7.817595
    23  O    4.217600   2.810727   2.368197   3.656524   4.813635
    24  O    5.066483   4.825504   3.666131   2.405442   2.879111
    25  H    4.804144   4.839250   3.882411   2.478413   2.436620
                    6          7          8          9         10
     6  C    0.000000
     7  H    2.138029   0.000000
     8  H    3.411687   2.499386   0.000000
     9  H    2.139344   4.267085   4.961446   0.000000
    10  H    1.082491   2.474106   4.312853   2.451969   0.000000
    11  C    3.770374   5.315834   4.579356   2.756999   4.645358
    12  C    4.298277   4.639588   2.666173   4.692985   5.380768
    13  C    4.974990   6.203018   4.897677   4.194841   5.935755
    14  C    5.170357   5.914167   4.118879   4.965063   6.225239
    15  C    6.212941   7.570386   6.279649   5.104233   7.108949
    16  C    6.542436   7.122473   5.072224   6.341292   7.606015
    17  C    7.389181   8.533304   6.920702   6.458315   8.341913
    18  H    6.413479   7.998960   6.990399   4.976486   7.201702
    19  C    7.533988   8.348003   6.422200   6.982148   8.560778
    20  H    6.966580   7.231300   4.957693   7.056524   8.047679
    21  H    8.566149   9.273457   7.220661   8.064496   9.604675
    22  Br   9.087064  10.373596   8.832898   7.892985   9.978342
    23  O    5.045142   4.863534   2.475160   5.787166   6.106509
    24  O    4.284876   6.133008   5.764228   2.621044   4.945234
    25  H    3.810785   5.821706   5.860095   1.867937   4.303875
                   11         12         13         14         15
    11  C    0.000000
    12  C    2.850677   0.000000
    13  C    1.441349   2.505339   0.000000
    14  C    2.455536   1.462757   1.418841   0.000000
    15  C    2.463810   3.790080   1.396415   2.452748   0.000000
    16  C    3.729236   2.488287   2.420446   1.398724   2.808200
    17  C    3.742903   4.271933   2.414212   2.809177   1.409246
    18  H    2.689910   4.657095   2.153353   3.430449   1.080276
    19  C    4.232918   3.780383   2.791687   2.437529   2.427549
    20  H    4.592816   2.685552   3.398819   2.140296   3.889703
    21  H    5.316138   4.647402   3.874920   3.415143   3.408886
    22  Br   5.333923   6.186862   4.177737   4.724107   2.874537
    23  O    4.105437   1.254772   3.645926   2.365389   4.816506
    24  O    1.312753   4.161460   2.320639   3.613250   2.699725
    25  H    1.916435   4.668360   3.182156   4.363853   3.668167
                   16         17         18         19         20
    16  C    0.000000
    17  C    2.412634   0.000000
    18  H    3.888470   2.172908   0.000000
    19  C    1.406459   1.379843   3.407311   0.000000
    20  H    1.081524   3.394577   4.969965   2.167024   0.000000
    21  H    2.160967   2.139798   4.302673   1.083232   2.496595
    22  Br   4.186061   1.914943   2.987531   2.867002   5.033928
    23  O    2.824703   5.031365   5.764820   4.230161   2.507089
    24  O    4.741074   4.108412   2.371969   4.939533   5.700670
    25  H    5.583376   5.076608   3.288309   5.877377   6.492672
                   21         22         23         24         25
    21  H    0.000000
    22  Br   2.972285   0.000000
    23  O    4.886397   6.915394   0.000000
    24  O    5.997850   5.335512   5.416113   0.000000
    25  H    6.943743   6.271060   5.908555   0.968570   0.000000
 Stoichiometry    C14H8BrO2(2)
 Framework group  C1[X(C14H8BrO2)]
 Deg. of freedom    69
 Full point group                 C1      NOp   1
 RotChk:  IX=0 Diff= 1.52D-03
 Largest Abelian subgroup         C1      NOp   1
 Largest concise Abelian subgroup C1      NOp   1
                         Standard orientation:                         
 ---------------------------------------------------------------------
 Center     Atomic      Atomic             Coordinates (Angstroms)
 Number     Number       Type             X           Y           Z
 ---------------------------------------------------------------------
      1          6           0       -5.083036    0.051952   -0.000003
      2          6           0       -4.043289    1.000737    0.000003
      3          6           0       -2.711250    0.590423    0.000002
      4          6           0       -2.425750   -0.804214   -0.000003
      5          6           0       -3.471188   -1.734753   -0.000019
      6          6           0       -4.810764   -1.303874   -0.000016
      7          1           0       -6.113024    0.391794    0.000000
      8          1           0       -4.253646    2.062017    0.000008
      9          1           0       -3.285571   -2.804067   -0.000042
     10          1           0       -5.612538   -2.031162   -0.000025
     11          6           0       -1.041764   -1.202077    0.000012
     12          6           0       -1.630088    1.587230    0.000000
     13          6           0        0.054933   -0.266801    0.000000
     14          6           0       -0.243886    1.120216   -0.000004
     15          6           0        1.374912   -0.722462    0.000002
     16          6           0        0.818478    2.030058   -0.000008
     17          6           0        2.418640    0.224432   -0.000004
     18          1           0        1.584858   -1.782141    0.000007
     19          6           0        2.150283    1.577928   -0.000009
     20          1           0        0.596601    3.088578   -0.000009
     21          1           0        2.963295    2.293752   -0.000013
     22         35           0        4.230710   -0.394767   -0.000005
     23          8           0       -1.895366    2.813639    0.000014
     24          8           0       -0.686443   -2.465829    0.000042
     25          1           0       -1.437706   -3.077165    0.000084
 ---------------------------------------------------------------------
 Rotational constants (GHZ):      0.9908433      0.1760929      0.1495202
 Leave Link  202 at Fri Jan 10 15:22:40 2020, MaxMem=   134217728 cpu:         0.0
 (Enter E:\Gaussian\G09W\l301.exe)
 Standard basis: 6-311G(d) (5D, 7F)
 Ernie: Thresh=  0.10000D-02 Tol=  0.10000D-05 Strict=F.
 There are   375 symmetry adapted cartesian basis functions of A   symmetry.
 There are   356 symmetry adapted basis functions of A   symmetry.
   356 basis functions,   642 primitive gaussians,   375 cartesian basis functions
    72 alpha electrons       71 beta electrons
       nuclear repulsion energy      1391.7620583369 Hartrees.
 IExCor=  402 DFT=T Ex+Corr=B3LYP ExCW=0 ScaHFX=  0.200000
 ScaDFX=  0.800000  0.720000  1.000000  0.810000 ScalE2=  1.000000  1.000000
 IRadAn=      0 IRanWt=     -1 IRanGd=            0 ICorTp=0 IEmpDi=141
 NAtoms=   25 NActive=   25 NUniq=   25 SFac= 1.00D+00 NAtFMM=   60 NAOKFM=F Big=F
 Integral buffers will be    262144 words long.
 Raffenetti 2 integral format.
 Two-electron integral symmetry is turned on.
 R6Disp:  Grimme-D3(BJ) Dispersion energy=       -0.0633125924 Hartrees.
 Nuclear repulsion after empirical dispersion term =     1391.6987457444 Hartrees.
 ------------------------------------------------------------------------------
 Polarizable Continuum Model (PCM)
 =================================
 Model                : PCM (using non-symmetric T matrix).
 Atomic radii         : UFF (Universal Force Field).
 Polarization charges : Total charges.
 Charge compensation  : None.
 Solution method      : On-the-fly selection.
 Cavity type          : Scaled VdW (van der Waals Surface) (Alpha=1.100).
 Cavity algorithm     : GePol (No added spheres)
                        Default sphere list used, NSphG=   25.
                        Lebedev-Laikov grids with approx.  5.0 points / Ang**2.
                        Smoothing algorithm: Karplus/York (Gamma=1.0000).
                        Polarization charges: spherical gaussians, with
                                              point-specific exponents (IZeta= 3).
                        Self-potential: point-specific (ISelfS= 7).
                        Self-field    : sphere-specific E.n sum rule (ISelfD= 2).
 1st derivatives      : Analytical E(r).r(x)/FMM algorithm (CHGder, D1EAlg=3).
                        Cavity 1st derivative terms included.
 Solvent              : Acetonitrile, Eps=  35.688000 Eps(inf)=   1.806874
 ------------------------------------------------------------------------------
 GePol: Number of generator spheres                  =      25
 GePol: Total number of spheres                      =      25
 GePol: Number of exposed spheres                    =      25 (100.00%)
 GePol: Number of points                             =    2201
 GePol: Average weight of points                     =       0.13
 GePol: Minimum weight of points                     =   0.86D-11
 GePol: Maximum weight of points                     =    0.20577
 GePol: Number of points with low weight             =     149
 GePol: Fraction of low-weight points (<1% of avg)   =       6.77%
 GePol: Cavity surface area                          =    281.055 Ang**2
 GePol: Cavity volume                                =    307.905 Ang**3
 Leave Link  301 at Fri Jan 10 15:22:40 2020, MaxMem=   134217728 cpu:         0.0
 (Enter E:\Gaussian\G09W\l302.exe)
 NPDir=0 NMtPBC=     1 NCelOv=     1 NCel=       1 NClECP=     1 NCelD=      1
         NCelK=      1 NCelE2=     1 NClLst=     1 CellRange=     0.0.
 One-electron integrals computed using PRISM.
 NBasis=   356 RedAO= T EigKep=  8.63D-05  NBF=   356
 NBsUse=   356 1.00D-06 EigRej= -1.00D+00 NBFU=   356
 Precomputing XC quadrature grid using
 IXCGrd= 4 IRadAn=           0 IRanWt=          -1 IRanGd=           0 AccXCQ= 0.00D+00.
 Generated NRdTot=       0 NPtTot=           0 NUsed=           0 NTot=          16
 NSgBfM=   366   366   366   366   366 MxSgAt=    25 MxSgA2=    25.
 Leave Link  302 at Fri Jan 10 15:22:42 2020, MaxMem=   134217728 cpu:         1.0
 (Enter E:\Gaussian\G09W\l308.exe)
 Leave Link  308 at Fri Jan 10 15:22:43 2020, MaxMem=   134217728 cpu:         0.0
 (Enter E:\Gaussian\G09W\l303.exe)
 DipDrv:  MaxL=1.
 Leave Link  303 at Fri Jan 10 15:22:43 2020, MaxMem=   134217728 cpu:         0.0
 (Enter E:\Gaussian\G09W\l401.exe)
 Initial guess from the checkpoint file:  "E:\Gaussian file\2-BrHAQ excited opt.chk"
 B after Tr=     0.000000    0.000000    0.000000
         Rot=    1.000000    0.000000    0.000000   -0.000221 Ang=   0.03 deg.
 Guess basis will be translated and rotated to current coordinates.
 JPrj=2 DoOrth=T DoCkMO=T.
 Initial guess <Sx>= 0.0000 <Sy>= 0.0000 <Sz>= 0.5000 <S**2>= 0.7734 S= 0.5116
 Generating alternative initial guess.
 ExpMin= 1.03D-01 ExpMax= 4.40D+05 ExpMxC= 1.51D+04 IAcc=2 IRadAn=         4 AccDes= 0.00D+00
 Harris functional with IExCor=  402 and IRadAn=       4 diagonalized for initial guess.
 HarFok:  IExCor=  402 AccDes= 0.00D+00 IRadAn=         4 IDoV= 1 UseB2=F ITyADJ=14
 ICtDFT=  3500011 ScaDFX=  1.000000  1.000000  1.000000  1.000000
 FoFCou: FMM=F IPFlag=           0 FMFlag=      100000 FMFlg1=           0
         NFxFlg=           0 DoJE=T BraDBF=F KetDBF=T FulRan=T
         wScrn=  0.000000 ICntrl=     500 IOpCl=  0 I1Cent=   200000004 NGrid=           0
         NMat0=    1 NMatS0=      1 NMatT0=    0 NMatD0=    1 NMtDS0=    0 NMtDT0=    0
 Petite list used in FoFCou.
 Harris En= -3263.18998837326    
 Leave Link  401 at Fri Jan 10 15:23:01 2020, MaxMem=   134217728 cpu:        18.0
 (Enter E:\Gaussian\G09W\l502.exe)
 UHF open shell SCF:
 Using DIIS extrapolation, IDIIS=  1040.
 Integral symmetry usage will be decided dynamically.
 IVT=      444890 IEndB=      444890 NGot=   134217728 MDV=   133930479
 LenX=   133930479 LenY=   133789413
 Requested convergence on RMS density matrix=1.00D-08 within 128 cycles.
 Requested convergence on MAX density matrix=1.00D-06.
 Requested convergence on             energy=1.00D-06.
 No special actions if energy rises.
 Fock matrices will be formed incrementally for  20 cycles.

 Cycle   1  Pass 1  IDiag  1:
 FoFJK:  IHMeth= 1 ICntrl=       0 DoSepK=F KAlg= 0 I1Cent=   0 FoldK=F
 IRaf= 780000000 NMat=   1 IRICut=       1 DoRegI=T DoRafI=F ISym2E= 0.
 FoFCou: FMM=F IPFlag=           0 FMFlag=      100000 FMFlg1=           0
         NFxFlg=           0 DoJE=F BraDBF=F KetDBF=F FulRan=T
         wScrn=  0.000000 ICntrl=       0 IOpCl=  1 I1Cent=           0 NGrid=           0
         NMat0=    1 NMatS0=      1 NMatT0=    0 NMatD0=    1 NMtDS0=    0 NMtDT0=    0
 Symmetry not used in FoFCou.
 Inv3:  Mode=1 IEnd=    14533203.
 Iteration    1 A*A^-1 deviation from unit magnitude is 2.22D-15 for   1828.
 Iteration    1 A*A^-1 deviation from orthogonality  is 2.48D-15 for   1052    758.
 Iteration    1 A^-1*A deviation from unit magnitude is 2.44D-15 for   1270.
 Iteration    1 A^-1*A deviation from orthogonality  is 1.40D-12 for   2023   1561.
 E= -3263.11799583741    
 DIIS: error= 9.69D-04 at cycle   1 NSaved=   1.
 NSaved= 1 IEnMin= 1 EnMin= -3263.11799583741     IErMin= 1 ErrMin= 9.69D-04
 ErrMax= 9.69D-04  0.00D+00 EMaxC= 1.00D-01 BMatC= 1.70D-03 BMatP= 1.70D-03
 IDIUse=3 WtCom= 9.90D-01 WtEn= 9.69D-03
 Coeff-Com:  0.100D+01
 Coeff-En:   0.100D+01
 Coeff:      0.100D+01
 Gap=     0.721 Goal=   None    Shift=    0.000
 Gap=     0.796 Goal=   None    Shift=    0.000
 RMSDP=1.71D-04 MaxDP=7.74D-03              OVMax= 8.97D-03

 Cycle   2  Pass 1  IDiag  1:
 RMSU=  1.70D-04    CP:  1.00D+00
 E= -3263.11853320719     Delta-E=       -0.000537369773 Rises=F Damp=F
 DIIS: error= 4.60D-04 at cycle   2 NSaved=   2.
 NSaved= 2 IEnMin= 2 EnMin= -3263.11853320719     IErMin= 2 ErrMin= 4.60D-04
 ErrMax= 4.60D-04  0.00D+00 EMaxC= 1.00D-01 BMatC= 2.43D-04 BMatP= 1.70D-03
 IDIUse=3 WtCom= 9.95D-01 WtEn= 4.60D-03
 Coeff-Com:  0.147D+00 0.853D+00
 Coeff-En:   0.000D+00 0.100D+01
 Coeff:      0.146D+00 0.854D+00
 Gap=     0.100 Goal=   None    Shift=    0.000
 Gap=     0.139 Goal=   None    Shift=    0.000
 RMSDP=7.59D-05 MaxDP=3.35D-03 DE=-5.37D-04 OVMax= 3.96D-03

 Cycle   3  Pass 1  IDiag  1:
 RMSU=  6.41D-05    CP:  1.00D+00  7.74D-01
 E= -3263.11848870955     Delta-E=        0.000044497636 Rises=F Damp=F
 DIIS: error= 7.61D-04 at cycle   3 NSaved=   3.
 NSaved= 3 IEnMin= 2 EnMin= -3263.11853320719     IErMin= 2 ErrMin= 4.60D-04
 ErrMax= 7.61D-04  0.00D+00 EMaxC= 1.00D-01 BMatC= 5.09D-04 BMatP= 2.43D-04
 IDIUse=3 WtCom= 2.66D-01 WtEn= 7.34D-01
 Coeff-Com: -0.155D-01 0.602D+00 0.413D+00
 Coeff-En:   0.000D+00 0.632D+00 0.368D+00
 Coeff:     -0.414D-02 0.624D+00 0.380D+00
 Gap=     0.100 Goal=   None    Shift=    0.000
 Gap=     0.140 Goal=   None    Shift=    0.000
 RMSDP=5.91D-05 MaxDP=2.67D-03 DE= 4.45D-05 OVMax= 2.31D-03

 Cycle   4  Pass 1  IDiag  1:
 RMSU=  1.41D-05    CP:  1.00D+00  9.69D-01  2.91D-01
 E= -3263.11858289043     Delta-E=       -0.000094180875 Rises=F Damp=F
 DIIS: error= 1.01D-04 at cycle   4 NSaved=   4.
 NSaved= 4 IEnMin= 4 EnMin= -3263.11858289043     IErMin= 4 ErrMin= 1.01D-04
 ErrMax= 1.01D-04  0.00D+00 EMaxC= 1.00D-01 BMatC= 6.99D-06 BMatP= 2.43D-04
 IDIUse=3 WtCom= 9.99D-01 WtEn= 1.01D-03
 Coeff-Com: -0.117D-01 0.228D+00 0.151D+00 0.632D+00
 Coeff-En:   0.000D+00 0.000D+00 0.000D+00 0.100D+01
 Coeff:     -0.117D-01 0.228D+00 0.151D+00 0.632D+00
 Gap=     0.100 Goal=   None    Shift=    0.000
 Gap=     0.140 Goal=   None    Shift=    0.000
 RMSDP=8.29D-06 MaxDP=2.95D-04 DE=-9.42D-05 OVMax= 7.02D-04

 Cycle   5  Pass 1  IDiag  1:
 RMSU=  5.34D-06    CP:  1.00D+00  9.62D-01  3.57D-01  7.00D-01
 E= -3263.11858403407     Delta-E=       -0.000001143643 Rises=F Damp=F
 DIIS: error= 7.00D-05 at cycle   5 NSaved=   5.
 NSaved= 5 IEnMin= 5 EnMin= -3263.11858403407     IErMin= 5 ErrMin= 7.00D-05
 ErrMax= 7.00D-05  0.00D+00 EMaxC= 1.00D-01 BMatC= 3.38D-06 BMatP= 6.99D-06
 IDIUse=1 WtCom= 1.00D+00 WtEn= 0.00D+00
 Coeff-Com: -0.496D-02 0.604D-01 0.381D-01 0.410D+00 0.496D+00
 Coeff:     -0.496D-02 0.604D-01 0.381D-01 0.410D+00 0.496D+00
 Gap=     0.100 Goal=   None    Shift=    0.000
 Gap=     0.140 Goal=   None    Shift=    0.000
 RMSDP=3.51D-06 MaxDP=1.51D-04 DE=-1.14D-06 OVMax= 6.33D-04

 Cycle   6  Pass 1  IDiag  1:
 RMSU=  1.85D-06    CP:  1.00D+00  9.65D-01  3.36D-01  8.45D-01  7.28D-01
 E= -3263.11858483297     Delta-E=       -0.000000798904 Rises=F Damp=F
 DIIS: error= 1.58D-05 at cycle   6 NSaved=   6.
 NSaved= 6 IEnMin= 6 EnMin= -3263.11858483297     IErMin= 6 ErrMin= 1.58D-05
 ErrMax= 1.58D-05  0.00D+00 EMaxC= 1.00D-01 BMatC= 1.25D-07 BMatP= 3.38D-06
 IDIUse=1 WtCom= 1.00D+00 WtEn= 0.00D+00
 Coeff-Com: -0.106D-03-0.123D-01-0.981D-02 0.709D-01 0.164D+00 0.788D+00
 Coeff:     -0.106D-03-0.123D-01-0.981D-02 0.709D-01 0.164D+00 0.788D+00
 Gap=     0.100 Goal=   None    Shift=    0.000
 Gap=     0.140 Goal=   None    Shift=    0.000
 RMSDP=1.05D-06 MaxDP=3.39D-05 DE=-7.99D-07 OVMax= 2.32D-04

 Cycle   7  Pass 1  IDiag  1:
 RMSU=  8.09D-07    CP:  1.00D+00  9.66D-01  3.38D-01  8.68D-01  8.25D-01
                    CP:  1.11D+00
 E= -3263.11858490775     Delta-E=       -0.000000074780 Rises=F Damp=F
 DIIS: error= 1.32D-05 at cycle   7 NSaved=   7.
 NSaved= 7 IEnMin= 7 EnMin= -3263.11858490775     IErMin= 7 ErrMin= 1.32D-05
 ErrMax= 1.32D-05  0.00D+00 EMaxC= 1.00D-01 BMatC= 6.44D-08 BMatP= 1.25D-07
 IDIUse=1 WtCom= 1.00D+00 WtEn= 0.00D+00
 Coeff-Com:  0.107D-02-0.218D-01-0.162D-01-0.434D-01-0.672D-02 0.485D+00
 Coeff-Com:  0.602D+00
 Coeff:      0.107D-02-0.218D-01-0.162D-01-0.434D-01-0.672D-02 0.485D+00
 Coeff:      0.602D+00
 Gap=     0.100 Goal=   None    Shift=    0.000
 Gap=     0.140 Goal=   None    Shift=    0.000
 RMSDP=6.32D-07 MaxDP=2.42D-05 DE=-7.48D-08 OVMax= 1.65D-04

 Cycle   8  Pass 1  IDiag  1:
 RMSU=  4.26D-07    CP:  1.00D+00  9.67D-01  3.38D-01  8.90D-01  8.55D-01
                    CP:  1.28D+00  1.06D+00
 E= -3263.11858494260     Delta-E=       -0.000000034845 Rises=F Damp=F
 DIIS: error= 4.48D-06 at cycle   8 NSaved=   8.
 NSaved= 8 IEnMin= 8 EnMin= -3263.11858494260     IErMin= 8 ErrMin= 4.48D-06
 ErrMax= 4.48D-06  0.00D+00 EMaxC= 1.00D-01 BMatC= 1.11D-08 BMatP= 6.44D-08
 IDIUse=1 WtCom= 1.00D+00 WtEn= 0.00D+00
 Coeff-Com:  0.319D-03-0.154D-02-0.230D-02-0.333D-01-0.519D-01-0.113D+00
 Coeff-Com:  0.227D+00 0.975D+00
 Coeff:      0.319D-03-0.154D-02-0.230D-02-0.333D-01-0.519D-01-0.113D+00
 Coeff:      0.227D+00 0.975D+00
 Gap=     0.100 Goal=   None    Shift=    0.000
 Gap=     0.140 Goal=   None    Shift=    0.000
 RMSDP=5.26D-07 MaxDP=2.15D-05 DE=-3.48D-08 OVMax= 1.42D-04

 Cycle   9  Pass 1  IDiag  1:
 RMSU=  2.15D-07    CP:  1.00D+00  9.67D-01  3.36D-01  9.05D-01  8.74D-01
                    CP:  1.41D+00  1.40D+00  1.15D+00
 E= -3263.11858495392     Delta-E=       -0.000000011318 Rises=F Damp=F
 DIIS: error= 2.95D-06 at cycle   9 NSaved=   9.
 NSaved= 9 IEnMin= 9 EnMin= -3263.11858495392     IErMin= 9 ErrMin= 2.95D-06
 ErrMax= 2.95D-06  0.00D+00 EMaxC= 1.00D-01 BMatC= 4.08D-09 BMatP= 1.11D-08
 IDIUse=1 WtCom= 1.00D+00 WtEn= 0.00D+00
 Coeff-Com: -0.249D-04 0.393D-02 0.201D-02-0.942D-02-0.277D-01-0.166D+00
 Coeff-Com:  0.558D-02 0.558D+00 0.634D+00
 Coeff:     -0.249D-04 0.393D-02 0.201D-02-0.942D-02-0.277D-01-0.166D+00
 Coeff:      0.558D-02 0.558D+00 0.634D+00
 Gap=     0.100 Goal=   None    Shift=    0.000
 Gap=     0.140 Goal=   None    Shift=    0.000
 RMSDP=1.83D-07 MaxDP=9.03D-06 DE=-1.13D-08 OVMax= 4.56D-05

 Cycle  10  Pass 1  IDiag  1:
 RMSU=  1.14D-07    CP:  1.00D+00  9.67D-01  3.37D-01  9.06D-01  8.84D-01
                    CP:  1.44D+00  1.47D+00  1.37D+00  1.01D+00
 E= -3263.11858495634     Delta-E=       -0.000000002429 Rises=F Damp=F
 DIIS: error= 1.47D-06 at cycle  10 NSaved=  10.
 NSaved=10 IEnMin=10 EnMin= -3263.11858495634     IErMin=10 ErrMin= 1.47D-06
 ErrMax= 1.47D-06  0.00D+00 EMaxC= 1.00D-01 BMatC= 8.44D-10 BMatP= 4.08D-09
 IDIUse=1 WtCom= 1.00D+00 WtEn= 0.00D+00
 Coeff-Com: -0.121D-03 0.256D-02 0.173D-02 0.590D-02 0.189D-02-0.450D-01
 Coeff-Com: -0.691D-01-0.420D-01 0.313D+00 0.831D+00
 Coeff:     -0.121D-03 0.256D-02 0.173D-02 0.590D-02 0.189D-02-0.450D-01
 Coeff:     -0.691D-01-0.420D-01 0.313D+00 0.831D+00
 Gap=     0.100 Goal=   None    Shift=    0.000
 Gap=     0.140 Goal=   None    Shift=    0.000
 RMSDP=1.04D-07 MaxDP=5.98D-06 DE=-2.43D-09 OVMax= 1.89D-05

 Cycle  11  Pass 1  IDiag  1:
 RMSU=  5.10D-08    CP:  1.00D+00  9.67D-01  3.36D-01  9.07D-01  8.84D-01
                    CP:  1.46D+00  1.52D+00  1.44D+00  1.29D+00  1.09D+00
 E= -3263.11858495703     Delta-E=       -0.000000000684 Rises=F Damp=F
 DIIS: error= 1.04D-06 at cycle  11 NSaved=  11.
 NSaved=11 IEnMin=11 EnMin= -3263.11858495703     IErMin=11 ErrMin= 1.04D-06
 ErrMax= 1.04D-06  0.00D+00 EMaxC= 1.00D-01 BMatC= 2.08D-10 BMatP= 8.44D-10
 IDIUse=1 WtCom= 1.00D+00 WtEn= 0.00D+00
 Coeff-Com: -0.515D-04 0.401D-03 0.357D-03 0.469D-02 0.570D-02 0.116D-01
 Coeff-Com: -0.329D-01-0.126D+00 0.371D-01 0.381D+00 0.718D+00
 Coeff:     -0.515D-04 0.401D-03 0.357D-03 0.469D-02 0.570D-02 0.116D-01
 Coeff:     -0.329D-01-0.126D+00 0.371D-01 0.381D+00 0.718D+00
 Gap=     0.100 Goal=   None    Shift=    0.000
 Gap=     0.140 Goal=   None    Shift=    0.000
 RMSDP=4.59D-08 MaxDP=2.16D-06 DE=-6.84D-10 OVMax= 9.38D-06

 Cycle  12  Pass 1  IDiag  1:
 RMSU=  2.88D-08    CP:  1.00D+00  9.67D-01  3.36D-01  9.07D-01  8.84D-01
                    CP:  1.46D+00  1.53D+00  1.46D+00  1.36D+00  1.30D+00
                    CP:  1.19D+00
 E= -3263.11858495721     Delta-E=       -0.000000000179 Rises=F Damp=F
 DIIS: error= 6.55D-07 at cycle  12 NSaved=  12.
 NSaved=12 IEnMin=12 EnMin= -3263.11858495721     IErMin=12 ErrMin= 6.55D-07
 ErrMax= 6.55D-07  0.00D+00 EMaxC= 1.00D-01 BMatC= 8.67D-11 BMatP= 2.08D-10
 IDIUse=1 WtCom= 1.00D+00 WtEn= 0.00D+00
 Coeff-Com:  0.173D-04-0.750D-03-0.501D-03 0.689D-03 0.224D-02 0.248D-01
 Coeff-Com:  0.734D-02-0.576D-01-0.930D-01-0.117D+00 0.437D+00 0.796D+00
 Coeff:      0.173D-04-0.750D-03-0.501D-03 0.689D-03 0.224D-02 0.248D-01
 Coeff:      0.734D-02-0.576D-01-0.930D-01-0.117D+00 0.437D+00 0.796D+00
 Gap=     0.100 Goal=   None    Shift=    0.000
 Gap=     0.140 Goal=   None    Shift=    0.000
 RMSDP=3.42D-08 MaxDP=1.37D-06 DE=-1.79D-10 OVMax= 5.38D-06

 Cycle  13  Pass 1  IDiag  1:
 RMSU=  1.38D-08    CP:  1.00D+00  9.67D-01  3.36D-01  9.07D-01  8.83D-01
                    CP:  1.46D+00  1.52D+00  1.47D+00  1.42D+00  1.40D+00
                    CP:  1.55D+00  1.09D+00
 E= -3263.11858495723     Delta-E=       -0.000000000020 Rises=F Damp=F
 DIIS: error= 1.79D-07 at cycle  13 NSaved=  13.
 NSaved=13 IEnMin=13 EnMin= -3263.11858495723     IErMin=13 ErrMin= 1.79D-07
 ErrMax= 1.79D-07  0.00D+00 EMaxC= 1.00D-01 BMatC= 9.04D-12 BMatP= 8.67D-11
 IDIUse=1 WtCom= 1.00D+00 WtEn= 0.00D+00
 Coeff-Com:  0.142D-04-0.243D-03-0.216D-03-0.623D-03-0.910D-03 0.320D-02
 Coeff-Com:  0.694D-02 0.967D-02-0.213D-01-0.999D-01-0.394D-01 0.164D+00
 Coeff-Com:  0.978D+00
 Coeff:      0.142D-04-0.243D-03-0.216D-03-0.623D-03-0.910D-03 0.320D-02
 Coeff:      0.694D-02 0.967D-02-0.213D-01-0.999D-01-0.394D-01 0.164D+00
 Coeff:      0.978D+00
 Gap=     0.100 Goal=   None    Shift=    0.000
 Gap=     0.140 Goal=   None    Shift=    0.000
 RMSDP=1.56D-08 MaxDP=7.92D-07 DE=-2.00D-11 OVMax= 3.38D-06

 Cycle  14  Pass 1  IDiag  1:
 RMSU=  5.49D-09    CP:  1.00D+00  9.67D-01  3.36D-01  9.07D-01  8.83D-01
                    CP:  1.46D+00  1.52D+00  1.47D+00  1.44D+00  1.45D+00
                    CP:  1.70D+00  1.32D+00  1.24D+00
 E= -3263.11858495725     Delta-E=       -0.000000000017 Rises=F Damp=F
 DIIS: error= 8.76D-08 at cycle  14 NSaved=  14.
 NSaved=14 IEnMin=14 EnMin= -3263.11858495725     IErMin=14 ErrMin= 8.76D-08
 ErrMax= 8.76D-08  0.00D+00 EMaxC= 1.00D-01 BMatC= 2.75D-12 BMatP= 9.04D-12
 IDIUse=1 WtCom= 1.00D+00 WtEn= 0.00D+00
 Coeff-Com:  0.309D-05 0.297D-04-0.427D-05-0.470D-03-0.984D-03-0.347D-02
 Coeff-Com:  0.175D-02 0.157D-01 0.947D-02-0.259D-01-0.984D-01-0.728D-01
 Coeff-Com:  0.456D+00 0.719D+00
 Coeff:      0.309D-05 0.297D-04-0.427D-05-0.470D-03-0.984D-03-0.347D-02
 Coeff:      0.175D-02 0.157D-01 0.947D-02-0.259D-01-0.984D-01-0.728D-01
 Coeff:      0.456D+00 0.719D+00
 Gap=     0.100 Goal=   None    Shift=    0.000
 Gap=     0.140 Goal=   None    Shift=    0.000
 RMSDP=5.95D-09 MaxDP=2.45D-07 DE=-1.73D-11 OVMax= 1.17D-06

 Error on total polarization charges =  0.01435
 SCF Done:  E(UB3LYP) =  -3263.11858496     A.U. after   14 cycles
            NFock= 14  Conv=0.59D-08     -V/T= 2.0018
 <Sx>= 0.0000 <Sy>= 0.0000 <Sz>= 0.5000 <S**2>= 0.7731 S= 0.5115
 <L.S>= 0.000000000000E+00
 KE= 3.257382829845D+03 PE=-1.054164617295D+04 EE= 2.629446012406D+03
 Annihilation of the first spin contaminant:
 S**2 before annihilation     0.7731,   after     0.7504
 Leave Link  502 at Fri Jan 10 15:41:47 2020, MaxMem=   134217728 cpu:      1126.0
 (Enter E:\Gaussian\G09W\l801.exe)
 DoSCS=F DFT=T ScalE2(SS,OS)=  1.000000  1.000000
 ExpMin= 1.03D-01 ExpMax= 4.40D+05 ExpMxC= 1.51D+04 IAcc=3 IRadAn=         5 AccDes= 0.00D+00
 HarFok:  IExCor=  205 AccDes= 0.00D+00 IRadAn=         5 IDoV=-2 UseB2=F ITyADJ=14
 ICtDFT= 12500011 ScaDFX=  1.000000  1.000000  1.000000  1.000000
 Largest valence mixing into a core orbital is  2.26D-04
 Largest core mixing into a valence orbital is  1.80D-05
 Largest valence mixing into a core orbital is  2.26D-04
 Largest core mixing into a valence orbital is  1.91D-05
 Range of M.O.s used for correlation:    31   356
 NBasis=   356 NAE=    72 NBE=    71 NFC=    30 NFV=     0
 NROrb=    326 NOA=    42 NOB=    41 NVA=   284 NVB=   285

 **** Warning!!: The largest alpha MO coefficient is  0.21022467D+02


 **** Warning!!: The smallest alpha delta epsilon is  0.99976069D-01


 **** Warning!!: The largest beta MO coefficient is  0.21043801D+02

 Leave Link  801 at Fri Jan 10 15:41:49 2020, MaxMem=   134217728 cpu:         2.0
 (Enter E:\Gaussian\G09W\l914.exe)
 UHF ground state
 MDV=   134217728 DFT=T DoStab=F Mixed=T DoRPA=T DoScal=F NonHer=T
 NEqPCM:  Using equilibrium solvation (IEInf=0, Eps=  35.6880, EpsInf=   1.8069)
 Making orbital integer symmetry assigments:
 Orbital symmetries:
 Alpha Orbitals:
       Occupied  (A) (A) (A) (A) (A) (A) (A) (A) (A) (A) (A) (A)
                 (A) (A) (A) (A) (A) (A) (A) (A) (A) (A) (A) (A)
                 (A) (A) (A) (A) (A) (A) (A) (A) (A) (A) (A) (A)
                 (A) (A) (A) (A) (A) (A) (A) (A) (A) (A) (A) (A)
                 (A) (A) (A) (A) (A) (A) (A) (A) (A) (A) (A) (A)
                 (A) (A) (A) (A) (A) (A) (A) (A) (A) (A) (A) (A)
       Virtual   (A) (A) (A) (A) (A) (A) (A) (A) (A) (A) (A) (A)
                 (A) (A) (A) (A) (A) (A) (A) (A) (A) (A) (A) (A)
                 (A) (A) (A) (A) (A) (A) (A) (A) (A) (A) (A) (A)
                 (A) (A) (A) (A) (A) (A) (A) (A) (A) (A) (A) (A)
                 (A) (A) (A) (A) (A) (A) (A) (A) (A) (A) (A) (A)
                 (A) (A) (A) (A) (A) (A) (A) (A) (A) (A) (A) (A)
                 (A) (A) (A) (A) (A) (A) (A) (A) (A) (A) (A) (A)
                 (A) (A) (A) (A) (A) (A) (A) (A) (A) (A) (A) (A)
                 (A) (A) (A) (A) (A) (A) (A) (A) (A) (A) (A) (A)
                 (A) (A) (A) (A) (A) (A) (A) (A) (A) (A) (A) (A)
                 (A) (A) (A) (A) (A) (A) (A) (A) (A) (A) (A) (A)
                 (A) (A) (A) (A) (A) (A) (A) (A) (A) (A) (A) (A)
                 (A) (A) (A) (A) (A) (A) (A) (A) (A) (A) (A) (A)
                 (A) (A) (A) (A) (A) (A) (A) (A) (A) (A) (A) (A)
                 (A) (A) (A) (A) (A) (A) (A) (A) (A) (A) (A) (A)
                 (A) (A) (A) (A) (A) (A) (A) (A) (A) (A) (A) (A)
                 (A) (A) (A) (A) (A) (A) (A) (A) (A) (A) (A) (A)
                 (A) (A) (A) (A) (A) (A) (A) (A) (A) (A) (A) (A)
                 (A) (A) (A) (A) (A) (A) (A) (A) (A) (A) (A) (A)
                 (A) (A) (A) (A) (A) (A) (A) (A) (A) (A) (A) (A)
                 (A) (A) (A) (A) (A) (A) (A) (A) (A) (A) (A) (A)
                 (A) (A) (A) (A) (A) (A) (A) (A) (A) (A) (A) (A)
                 (A) (A) (A) (A) (A) (A) (A) (A) (A) (A) (A) (A)
                 (A) (A) (A) (A) (A) (A) (A) (A)
 Beta  Orbitals:
       Occupied  (A) (A) (A) (A) (A) (A) (A) (A) (A) (A) (A) (A)
                 (A) (A) (A) (A) (A) (A) (A) (A) (A) (A) (A) (A)
                 (A) (A) (A) (A) (A) (A) (A) (A) (A) (A) (A) (A)
                 (A) (A) (A) (A) (A) (A) (A) (A) (A) (A) (A) (A)
                 (A) (A) (A) (A) (A) (A) (A) (A) (A) (A) (A) (A)
                 (A) (A) (A) (A) (A) (A) (A) (A) (A) (A) (A)
       Virtual   (A) (A) (A) (A) (A) (A) (A) (A) (A) (A) (A) (A)
                 (A) (A) (A) (A) (A) (A) (A) (A) (A) (A) (A) (A)
                 (A) (A) (A) (A) (A) (A) (A) (A) (A) (A) (A) (A)
                 (A) (A) (A) (A) (A) (A) (A) (A) (A) (A) (A) (A)
                 (A) (A) (A) (A) (A) (A) (A) (A) (A) (A) (A) (A)
                 (A) (A) (A) (A) (A) (A) (A) (A) (A) (A) (A) (A)
                 (A) (A) (A) (A) (A) (A) (A) (A) (A) (A) (A) (A)
                 (A) (A) (A) (A) (A) (A) (A) (A) (A) (A) (A) (A)
                 (A) (A) (A) (A) (A) (A) (A) (A) (A) (A) (A) (A)
                 (A) (A) (A) (A) (A) (A) (A) (A) (A) (A) (A) (A)
                 (A) (A) (A) (A) (A) (A) (A) (A) (A) (A) (A) (A)
                 (A) (A) (A) (A) (A) (A) (A) (A) (A) (A) (A) (A)
                 (A) (A) (A) (A) (A) (A) (A) (A) (A) (A) (A) (A)
                 (A) (A) (A) (A) (A) (A) (A) (A) (A) (A) (A) (A)
                 (A) (A) (A) (A) (A) (A) (A) (A) (A) (A) (A) (A)
                 (A) (A) (A) (A) (A) (A) (A) (A) (A) (A) (A) (A)
                 (A) (A) (A) (A) (A) (A) (A) (A) (A) (A) (A) (A)
                 (A) (A) (A) (A) (A) (A) (A) (A) (A) (A) (A) (A)
                 (A) (A) (A) (A) (A) (A) (A) (A) (A) (A) (A) (A)
                 (A) (A) (A) (A) (A) (A) (A) (A) (A) (A) (A) (A)
                 (A) (A) (A) (A) (A) (A) (A) (A) (A) (A) (A) (A)
                 (A) (A) (A) (A) (A) (A) (A) (A) (A) (A) (A) (A)
                 (A) (A) (A) (A) (A) (A) (A) (A) (A) (A) (A) (A)
                 (A) (A) (A) (A) (A) (A) (A) (A) (A)
 Generating guess from densities on rwf.
 Convergence on wavefunction:    0.000001000000000
 Davidson Disk Diagonalization:  ConvIn= 1.00D-06 SkipCon=T Conv= 1.00D-06.
 Max sub-space:   200 roots to seek:     3 dimension of matrix:        23613
 Iteration     1 Dimension     6 NMult     0 NNew      6
 CISAX will form     6 AO SS matrices at one time.
 NMat=     6 NSing=     6 JSym2X= 0.
 FoFJK:  IHMeth= 1 ICntrl=       0 DoSepK=F KAlg= 0 I1Cent=   0 FoldK=F
 IRaf=         0 NMat=  12 IRICut=       1 DoRegI=T DoRafI=F ISym2E= 0.
 FoFCou: FMM=F IPFlag=           0 FMFlag=      100000 FMFlg1=           0
         NFxFlg=           0 DoJE=F BraDBF=F KetDBF=F FulRan=T
         wScrn=  0.000000 ICntrl=       0 IOpCl=  1 I1Cent=           0 NGrid=           0
         NMat0=   12 NMatS0=      6 NMatT0=    0 NMatD0=   12 NMtDS0=    0 NMtDT0=    0
 Symmetry not used in FoFCou.
 Excitation Energies [eV] at current iteration:
 Root      1 :     1.792534174885695
 Root      2 :     2.410529583183240
 Root      3 :     2.838478556868653
 Iteration     2 Dimension    12 NMult     6 NNew      6
 CISAX will form     6 AO SS matrices at one time.
 NMat=     6 NSing=     6 JSym2X= 0.
 Root      1 not converged, maximum delta is    0.008219493797341
 Root      2 not converged, maximum delta is    0.021320357594768
 Root      3 not converged, maximum delta is    0.030970930496148
 Excitation Energies [eV] at current iteration:
 Root      1 :     1.791240888165151   Change is   -0.001293286720543
 Root      2 :     2.408392209519788   Change is   -0.002137373663452
 Root      3 :     2.835528077980010   Change is   -0.002950478888644
 Iteration     3 Dimension    18 NMult    12 NNew      6
 CISAX will form     6 AO SS matrices at one time.
 NMat=     6 NSing=     6 JSym2X= 0.
 Root      1 not converged, maximum delta is    0.003089433621015
 Root      2 not converged, maximum delta is    0.002711832558494
 Root      3 not converged, maximum delta is    0.016930145477155
 Excitation Energies [eV] at current iteration:
 Root      1 :     1.791156449652681   Change is   -0.000084438512470
 Root      2 :     2.408324855398709   Change is   -0.000067354121079
 Root      3 :     2.834525287343511   Change is   -0.001002790636498
 Iteration     4 Dimension    24 NMult    18 NNew      6
 CISAX will form     6 AO SS matrices at one time.
 NMat=     6 NSing=     6 JSym2X= 0.
 Root      1 not converged, maximum delta is    0.000612102777443
 Root      2 not converged, maximum delta is    0.000516410368248
 Root      3 not converged, maximum delta is    0.012208158525421
 Excitation Energies [eV] at current iteration:
 Root      1 :     1.791144622646555   Change is   -0.000011827006126
 Root      2 :     2.408322963323013   Change is   -0.000001892075696
 Root      3 :     2.834144512559772   Change is   -0.000380774783739
 Iteration     5 Dimension    30 NMult    24 NNew      6
 CISAX will form     6 AO SS matrices at one time.
 NMat=     6 NSing=     6 JSym2X= 0.
 Root      1 not converged, maximum delta is    0.000258112910538
 Root      2 not converged, maximum delta is    0.000193324549730
 Root      3 not converged, maximum delta is    0.006612888159045
 Excitation Energies [eV] at current iteration:
 Root      1 :     1.791141727322358   Change is   -0.000002895324196
 Root      2 :     2.408322787665535   Change is   -0.000000175657478
 Root      3 :     2.833980525608582   Change is   -0.000163986951190
 Iteration     6 Dimension    36 NMult    30 NNew      6
 CISAX will form     6 AO SS matrices at one time.
 NMat=     6 NSing=     6 JSym2X= 0.
 Root      1 not converged, maximum delta is    0.000137272757603
 Root      2 not converged, maximum delta is    0.000008640387933
 Root      3 not converged, maximum delta is    0.003307906299522
 Excitation Energies [eV] at current iteration:
 Root      1 :     1.791140826963659   Change is   -0.000000900358700
 Root      2 :     2.408322778104493   Change is   -0.000000009561042
 Root      3 :     2.833916155735930   Change is   -0.000064369872652
 Iteration     7 Dimension    42 NMult    36 NNew      6
 CISAX will form     6 AO SS matrices at one time.
 NMat=     6 NSing=     6 JSym2X= 0.
 Root      1 not converged, maximum delta is    0.000043866427344
 Root      2 not converged, maximum delta is    0.000006841206645
 Root      3 not converged, maximum delta is    0.002658722881912
 Excitation Energies [eV] at current iteration:
 Root      1 :     1.791140704467896   Change is   -0.000000122495763
 Root      2 :     2.408322776203801   Change is   -0.000000001900691
 Root      3 :     2.833891745288335   Change is   -0.000024410447594
 Iteration     8 Dimension    48 NMult    42 NNew      6
 CISAX will form     6 AO SS matrices at one time.
 NMat=     6 NSing=     6 JSym2X= 0.
 Root      1 not converged, maximum delta is    0.000020931583145
 Root      2 has converged.
 Root      3 not converged, maximum delta is    0.002154778464030
 Excitation Energies [eV] at current iteration:
 Root      1 :     1.791140677867984   Change is   -0.000000026599912
 Root      2 :     2.408322776084739   Change is   -0.000000000119062
 Root      3 :     2.833880631465794   Change is   -0.000011113822542
 Iteration     9 Dimension    52 NMult    48 NNew      4
 CISAX will form     4 AO SS matrices at one time.
 NMat=     4 NSing=     4 JSym2X= 0.
 Root      1 not converged, maximum delta is    0.000011568587822
 Root      2 has converged.
 Root      3 not converged, maximum delta is    0.001341459560114
 Excitation Energies [eV] at current iteration:
 Root      1 :     1.791140672441889   Change is   -0.000000005426095
 Root      2 :     2.408322776083613   Change is   -0.000000000001126
 Root      3 :     2.833875720656834   Change is   -0.000004910808960
 Iteration    10 Dimension    56 NMult    52 NNew      4
 CISAX will form     4 AO SS matrices at one time.
 NMat=     4 NSing=     4 JSym2X= 0.
 Root      1 not converged, maximum delta is    0.000004540280747
 Root      2 has converged.
 Root      3 not converged, maximum delta is    0.000840150062110
 Excitation Energies [eV] at current iteration:
 Root      1 :     1.791140671542588   Change is   -0.000000000899301
 Root      2 :     2.408322776083374   Change is   -0.000000000000239
 Root      3 :     2.833873736268522   Change is   -0.000001984388312
 Iteration    11 Dimension    60 NMult    56 NNew      4
 CISAX will form     4 AO SS matrices at one time.
 NMat=     4 NSing=     4 JSym2X= 0.
 Root      1 not converged, maximum delta is    0.000001288595938
 Root      2 has converged.
 Root      3 not converged, maximum delta is    0.000252947669041
 Excitation Energies [eV] at current iteration:
 Root      1 :     1.791140671387824   Change is   -0.000000000154764
 Root      2 :     2.408322776082794   Change is   -0.000000000000580
 Root      3 :     2.833873236948920   Change is   -0.000000499319602
 Iteration    12 Dimension    64 NMult    60 NNew      4
 CISAX will form     4 AO SS matrices at one time.
 NMat=     4 NSing=     4 JSym2X= 0.
 Root      1 has converged.
 Root      2 has converged.
 Root      3 not converged, maximum delta is    0.000141163962127
 Excitation Energies [eV] at current iteration:
 Root      1 :     1.791140671363545   Change is   -0.000000000024279
 Root      2 :     2.408322776081872   Change is   -0.000000000000922
 Root      3 :     2.833873096150860   Change is   -0.000000140798060
 Iteration    13 Dimension    66 NMult    64 NNew      2
 CISAX will form     2 AO SS matrices at one time.
 NMat=     2 NSing=     2 JSym2X= 0.
 Root      1 has converged.
 Root      2 has converged.
 Root      3 not converged, maximum delta is    0.000045818473638
 Excitation Energies [eV] at current iteration:
 Root      1 :     1.791140671361204   Change is   -0.000000000002341
 Root      2 :     2.408322776081872   Change is    0.000000000000000
 Root      3 :     2.833873069634154   Change is   -0.000000026516706
 Iteration    14 Dimension    68 NMult    66 NNew      2
 CISAX will form     2 AO SS matrices at one time.
 NMat=     2 NSing=     2 JSym2X= 0.
 Root      1 has converged.
 Root      2 has converged.
 Root      3 not converged, maximum delta is    0.000010549662135
 Excitation Energies [eV] at current iteration:
 Root      1 :     1.791140671358542   Change is   -0.000000000002662
 Root      2 :     2.408322776080745   Change is   -0.000000000001126
 Root      3 :     2.833873066318554   Change is   -0.000000003315600
 Iteration    15 Dimension    70 NMult    68 NNew      2
 CISAX will form     2 AO SS matrices at one time.
 NMat=     2 NSing=     2 JSym2X= 0.
 Root      1 has converged.
 Root      2 has converged.
 Root      3 not converged, maximum delta is    0.000003250763741
 Excitation Energies [eV] at current iteration:
 Root      1 :     1.791140671358634   Change is    0.000000000000092
 Root      2 :     2.408322776080507   Change is   -0.000000000000239
 Root      3 :     2.833873065866450   Change is   -0.000000000452104
 Iteration    16 Dimension    72 NMult    70 NNew      2
 CISAX will form     2 AO SS matrices at one time.
 NMat=     2 NSing=     2 JSym2X= 0.
 Root      1 has converged.
 Root      2 has converged.
 Root      3 has converged.
 Excitation Energies [eV] at current iteration:
 Root      1 :     1.791140671358404   Change is   -0.000000000000229
 Root      2 :     2.408322776080507   Change is    0.000000000000000
 Root      3 :     2.833873065814321   Change is   -0.000000000052129
 Convergence achieved on expansion vectors.
 ***********************************************************************
 Excited states from <AA,BB:AA,BB> singles matrix:
 ***********************************************************************
 
 ExtSpn:  IState=     1 X2= 1.009 Y2= 0.009 X2-Y2-1= 2.22D-15
          S2Grnd=  0.773 Ra=  0.004 Rb=  0.007 T= -0.001 S2Ext=  0.009 S2=  0.782
 ExtSpn:  IState=     2 X2= 1.002 Y2= 0.002 X2-Y2-1=-2.89D-15
          S2Grnd=  0.773 Ra=  0.016 Rb=  0.192 T=  0.113 S2Ext=  0.321 S2=  1.095
 ExtSpn:  IState=     3 X2= 1.012 Y2= 0.012 X2-Y2-1=-3.89D-15
          S2Grnd=  0.773 Ra=  0.057 Rb=  0.070 T=  0.119 S2Ext=  0.246 S2=  1.019
 1PDM for each excited state written to RWF  633
 Ground to excited state transition densities written to RWF  633
 Ground to excited state transition electric dipole moments (Au):
       state          X           Y           Z        Dip. S.      Osc.
         1         0.0670     -0.8147      0.0000      0.6683      0.0293
         2         0.0000      0.0000     -0.0007      0.0000      0.0000
         3        -0.9186      0.2580      0.0000      0.9103      0.0632
 Ground to excited state transition velocity dipole moments (Au):
       state          X           Y           Z        Dip. S.      Osc.
         1        -0.0075      0.0653      0.0000      0.0043      0.0438
         2         0.0000      0.0000      0.0001      0.0000      0.0000
         3         0.0971     -0.0269      0.0000      0.0102      0.0650
 Ground to excited state transition magnetic dipole moments (Au):
       state          X           Y           Z
         1         0.0000      0.0000     -0.1682
         2         0.0816     -0.3722      0.0000
         3         0.0000      0.0000     -0.3500
 Ground to excited state transition velocity quadrupole moments (Au):
       state          XX          YY          ZZ          XY          XZ          YZ
         1        -0.0008      0.0500      0.0005     -0.1906      0.0000      0.0000
         2         0.0000      0.0000      0.0000      0.0000      0.0081      0.0015
         3        -0.0538     -0.1275      0.0082     -0.0013      0.0000      0.0000
 <0|del|b> * <b|rxdel|0> + <0|del|b> * <b|delr+rdel|0>
 Rotatory Strengths (R) in cgs (10**-40 erg-esu-cm/Gauss)
       state          XX          YY          ZZ    R(velocity)    E-M Angle
         1         0.0021     -0.0003      0.0012      0.0010       90.00
         2        -0.0003     -0.0003     -0.0006     -0.0004       90.00
         3         0.0007     -0.0002      0.0010      0.0005       90.00
 1/2[<0|r|b>*<b|rxdel|0> + (<0|rxdel|b>*<b|r|0>)*]
 Rotatory Strengths (R) in cgs (10**-40 erg-esu-cm/Gauss)
       state          XX          YY          ZZ     R(length)
         1        -0.0002      0.0021      0.0003      0.0007
         2        -0.0006     -0.0006      0.0000     -0.0004
         3         0.0000      0.0013      0.0001      0.0005
  1/2[<0|del|b>*<b|r|0> + (<0|r|b>*<b|del|0>)*] (Au)
       state          X           Y           Z        Dip. S.   Osc.(frdel)
         1        -0.0005     -0.0532      0.0000      0.0537      0.0358
         2         0.0000      0.0000      0.0000      0.0000      0.0000
         3        -0.0892     -0.0069      0.0000      0.0962      0.0641

 Excitation energies and oscillator strengths:
 
 Excited State   1:  2.032-A      1.7911 eV  692.21 nm  f=0.0293  <S**2>=0.782
     72A -> 73A        0.97762
     69B -> 72B        0.10752
     71B -> 72B        0.13784
 This state for optimization and/or second-order correction.
 Total Energy, E(TD-HF/TD-KS) =  -3263.05276175    
 Copying the excited state density for this state as the 1-particle RhoCI density.
 
 Excited State   2:  2.319-A      2.4083 eV  514.82 nm  f=0.0000  <S**2>=1.095
     70A -> 73A       -0.12349
     70B -> 72B        0.94022
     70B -> 73B        0.28558
     70B -> 79B       -0.11677
 
 Excited State   3:  2.253-A      2.8339 eV  437.51 nm  f=0.0632  <S**2>=1.019
     71A -> 73A       -0.15361
     72A -> 74A        0.52324
     68B -> 72B       -0.24686
     68B -> 73B        0.12928
     69B -> 72B       -0.20602
     71B -> 72B        0.70997
 SavETr:  write IOETrn=   770 NScale= 10 NData=  16 NLR=1 NState=    3 LETran=      62.
 The state does not have a specific multiplicity.
 CISAX will form     1 AO SS matrices at one time.
 NMat=     1 NSing=     1 JSym2X= 0.
 GePol: Maximum number of non-zero 1st derivatives   =     349
 CISAX will form     1 AO SS matrices at one time.
 NMat=     1 NSing=     1 JSym2X= 0.
 Leave Link  914 at Fri Jan 10 17:01:30 2020, MaxMem=   134217728 cpu:      4781.0
 (Enter E:\Gaussian\G09W\l1002.exe)
 Minotr:  UHF open shell wavefunction.
          Computing CIS/TD-HF/TD-KS derivatives.
          Using Z-Vector for PSCF gradient.
          Skipping F1 and S1 gradient terms here.
          IDoAtm=1111111111111111111111111
 NEqPCM:  Using equilibrium solvation (IEInf=0, Eps=  35.6880, EpsInf=   1.8069)
          Frozen-core window.
          Direct CPHF calculation.
          Differentiating once with respect to electric field.
                with respect to dipole field.
          Differentiating once with respect to nuclear coordinates.
          Requested convergence is 1.0D-10 RMS, and 1.0D-09 maximum.
          NewPWx=F KeepS1=T KeepF1=T KeepIn=T MapXYZ=F SortEE=F KeepMc=T.
          MDV=     134217222 using IRadAn=       0.
 Using stored XC quadrature information.
          Solving linear equations separately, MaxMat=       0.
          There are     1 degrees of freedom in the 1st order CPHF.  IDoFFX=0 NUNeed=     1.
 FoFJK:  IHMeth= 1 ICntrl=       0 DoSepK=F KAlg= 0 I1Cent=   0 FoldK=F
 IRaf= 800000000 NMat=   1 IRICut=       1 DoRegI=T DoRafI=F ISym2E=-1.
 FoFCou: FMM=F IPFlag=           0 FMFlag=      100000 FMFlg1=           0
         NFxFlg=           0 DoJE=F BraDBF=F KetDBF=F FulRan=T
         wScrn=  0.000000 ICntrl=       0 IOpCl=  1 I1Cent=           0 NGrid=           0
         NMat0=    1 NMatS0=      1 NMatT0=    0 NMatD0=    1 NMtDS0=    0 NMtDT0=    0
 Petite list used in FoFCou.
 LinEq1:  Iter=  0 NonCon=     1 RMS=2.67D-03 Max=2.34D-01 NDo=     1
 AX will form     1 AO Fock derivatives at one time.
 LinEq1:  Iter=  1 NonCon=     1 RMS=1.91D-03 Max=1.60D-01 NDo=     1
 LinEq1:  Iter=  2 NonCon=     1 RMS=9.71D-04 Max=4.99D-02 NDo=     1
 LinEq1:  Iter=  3 NonCon=     1 RMS=7.47D-04 Max=3.93D-02 NDo=     1
 LinEq1:  Iter=  4 NonCon=     1 RMS=5.91D-04 Max=2.98D-02 NDo=     1
 LinEq1:  Iter=  5 NonCon=     1 RMS=3.86D-04 Max=2.15D-02 NDo=     1
 LinEq1:  Iter=  6 NonCon=     1 RMS=3.23D-04 Max=1.51D-02 NDo=     1
 LinEq1:  Iter=  7 NonCon=     1 RMS=1.99D-04 Max=1.20D-02 NDo=     1
 LinEq1:  Iter=  8 NonCon=     1 RMS=1.58D-04 Max=1.27D-02 NDo=     1
 LinEq1:  Iter=  9 NonCon=     1 RMS=8.02D-05 Max=3.77D-03 NDo=     1
 LinEq1:  Iter= 10 NonCon=     1 RMS=5.23D-05 Max=2.74D-03 NDo=     1
 LinEq1:  Iter= 11 NonCon=     1 RMS=3.08D-05 Max=1.07D-03 NDo=     1
 LinEq1:  Iter= 12 NonCon=     1 RMS=1.69D-05 Max=8.23D-04 NDo=     1
 LinEq1:  Iter= 13 NonCon=     1 RMS=1.13D-05 Max=5.15D-04 NDo=     1
 LinEq1:  Iter= 14 NonCon=     1 RMS=7.53D-06 Max=3.93D-04 NDo=     1
 LinEq1:  Iter= 15 NonCon=     1 RMS=4.54D-06 Max=2.46D-04 NDo=     1
 LinEq1:  Iter= 16 NonCon=     1 RMS=2.64D-06 Max=1.24D-04 NDo=     1
 LinEq1:  Iter= 17 NonCon=     1 RMS=1.99D-06 Max=8.30D-05 NDo=     1
 LinEq1:  Iter= 18 NonCon=     1 RMS=8.31D-07 Max=3.40D-05 NDo=     1
 LinEq1:  Iter= 19 NonCon=     1 RMS=5.15D-07 Max=1.91D-05 NDo=     1
 LinEq1:  Iter= 20 NonCon=     1 RMS=2.73D-07 Max=1.00D-05 NDo=     1
 LinEq1:  Iter= 21 NonCon=     1 RMS=1.70D-07 Max=6.50D-06 NDo=     1
 LinEq1:  Iter= 22 NonCon=     1 RMS=1.01D-07 Max=4.57D-06 NDo=     1
 LinEq1:  Iter= 23 NonCon=     1 RMS=4.56D-08 Max=2.07D-06 NDo=     1
 LinEq1:  Iter= 24 NonCon=     1 RMS=3.39D-08 Max=1.13D-06 NDo=     1
 LinEq1:  Iter= 25 NonCon=     1 RMS=1.44D-08 Max=8.15D-07 NDo=     1
 LinEq1:  Iter= 26 NonCon=     1 RMS=9.31D-09 Max=3.26D-07 NDo=     1
 LinEq1:  Iter= 27 NonCon=     1 RMS=5.56D-09 Max=1.84D-07 NDo=     1
 LinEq1:  Iter= 28 NonCon=     1 RMS=2.88D-09 Max=9.99D-08 NDo=     1
 LinEq1:  Iter= 29 NonCon=     1 RMS=1.87D-09 Max=5.02D-08 NDo=     1
 LinEq1:  Iter= 30 NonCon=     1 RMS=6.85D-10 Max=1.83D-08 NDo=     1
 LinEq1:  Iter= 31 NonCon=     1 RMS=2.66D-10 Max=1.15D-08 NDo=     1
 LinEq1:  Iter= 32 NonCon=     1 RMS=1.84D-10 Max=8.82D-09 NDo=     1
 LinEq1:  Iter= 33 NonCon=     1 RMS=6.14D-11 Max=1.47D-09 NDo=     1
 LinEq1:  Iter= 34 NonCon=     0 RMS=2.13D-11 Max=4.87D-10 NDo=     1
 Linear equations converged to 1.000D-10 1.000D-09 after    34 iterations.
 End of Minotr F.D. properties file   721 does not exist.
 End of Minotr F.D. properties file   722 does not exist.
 End of Minotr F.D. properties file   788 does not exist.
 Leave Link 1002 at Fri Jan 10 17:59:23 2020, MaxMem=   134217728 cpu:      3473.0
 (Enter E:\Gaussian\G09W\l701.exe)
 Compute integral first derivatives.
 ... and contract with generalized density number  6.
 R6Disp: Adding Grimme-D3(BJ) dispersion energy 1st derivatives to the gradient.
 D1PCM: PCM CHGder 1st derivatives, ID1Alg=3 FixD1E=F DoIter=F DoCFld=F I1PDM=6.
 Leave Link  701 at Fri Jan 10 18:00:12 2020, MaxMem=   134217728 cpu:        49.0
 (Enter E:\Gaussian\G09W\l702.exe)
 L702 exits ... SP integral derivatives will be done elsewhere.
 Leave Link  702 at Fri Jan 10 18:00:12 2020, MaxMem=   134217728 cpu:         0.0
 (Enter E:\Gaussian\G09W\l703.exe)
 Compute integral first derivatives, UseDBF=F ICtDFT=           0.
 Integral derivatives from FoFJK, PRISM(SPDF).
 Calling FoFJK, ICntrl=  10005127 FMM=F ISym2X=0 I1Cent= 0 IOpClX= 1 NMat=1 NMatS=1 NMatT=0.
 FoFJK:  IHMeth= 1 ICntrl=10005127 DoSepK=F KAlg= 0 I1Cent=   0 FoldK=F
 IRaf=         0 NMat=   1 IRICut=       1 DoRegI=T DoRafI=F ISym2E= 0.
 FoFCou: FMM=F IPFlag=           0 FMFlag=      100000 FMFlg1=         800
         NFxFlg=           0 DoJE=F BraDBF=F KetDBF=F FulRan=T
         wScrn=  0.000000 ICntrl=10005127 IOpCl=  1 I1Cent=           0 NGrid=           0
         NMat0=    1 NMatS0=      1 NMatT0=    0 NMatD0=    1 NMtDS0=    0 NMtDT0=    0
 Symmetry not used in FoFCou.
 Leave Link  703 at Fri Jan 10 18:04:50 2020, MaxMem=   134217728 cpu:       277.0
 (Enter E:\Gaussian\G09W\l716.exe)
 Dipole        =-1.36362971D+00-3.21877292D+00 2.58826051D-05
 ***** Axes restored to original set *****
 -------------------------------------------------------------------
 Center     Atomic                   Forces (Hartrees/Bohr)
 Number     Number              X              Y              Z
 -------------------------------------------------------------------
      1        6          -0.000427846    0.000205790    0.000000034
      2        6           0.000470303   -0.000317905    0.000000023
      3        6          -0.000364506    0.001038116   -0.000000540
      4        6          -0.000304819   -0.000068486   -0.000000139
      5        6           0.000940647   -0.000195163    0.000000019
      6        6           0.000029371    0.000315976   -0.000000031
      7        1          -0.000020390    0.000299000   -0.000000028
      8        1          -0.000331454   -0.000246303    0.000000075
      9        1          -0.000226809    0.000087209    0.000000205
     10        1           0.000095058   -0.000308747   -0.000000056
     11        6          -0.000141037   -0.001842715    0.000000462
     12        6           0.000322217   -0.000129583    0.000001560
     13        6           0.000572071   -0.000003334   -0.000000407
     14        6          -0.000440967    0.001489215   -0.000000364
     15        6          -0.001292010   -0.000623435   -0.000000019
     16        6          -0.000652539   -0.000459514    0.000000053
     17        6           0.000730588    0.000668240   -0.000000016
     18        1           0.000416115    0.000201306    0.000000008
     19        6           0.000191312    0.000029350   -0.000000060
     20        1           0.000419109   -0.000038456    0.000000042
     21        1          -0.000142556    0.000353319    0.000000019
     22       35           0.000092293   -0.000328038    0.000000008
     23        8           0.000086526   -0.000185614   -0.000000693
     24        8          -0.000149749   -0.000343997    0.000000381
     25        1           0.000129073    0.000403769   -0.000000538
 -------------------------------------------------------------------
 Cartesian Forces:  Max     0.001842715 RMS     0.000436744
 Leave Link  716 at Fri Jan 10 18:04:51 2020, MaxMem=   134217728 cpu:         0.0
 (Enter E:\Gaussian\G09W\l103.exe)

 GradGradGradGradGradGradGradGradGradGradGradGradGradGradGradGradGradGrad
 Berny optimization.
 Using GEDIIS/GDIIS optimizer.
 FormGI is forming the generalized inverse of G from B-inverse, IUseBI=4.
 Internal  Forces:  Max     0.001030519 RMS     0.000255275
 Search for a local minimum.
 Step number   3 out of a maximum of  146
 All quantities printed in internal units (Hartrees-Bohrs-Radians)
 RMS Force = .25527D-03 SwitMx=.10000D-02 MixMth= 2
 Mixed Optimization -- En-DIIS/RFO-DIIS
 Update second derivatives using D2CorX and points    1    2    3
 DE= -6.99D-04 DEPred=-6.69D-04 R= 1.05D+00
 TightC=F SS=  1.41D+00  RLast= 7.60D-02 DXNew= 6.8268D-01 2.2798D-01
 Trust test= 1.05D+00 RLast= 7.60D-02 DXMaxT set to 4.06D-01
 ITU=  1  1  0
 Use linear search instead of GDIIS.
     Eigenvalues ---    0.01151   0.01345   0.01638   0.01707   0.01732
     Eigenvalues ---    0.01777   0.01839   0.01859   0.01881   0.02058
     Eigenvalues ---    0.02085   0.02104   0.02116   0.02147   0.02169
     Eigenvalues ---    0.02184   0.02197   0.02206   0.02218   0.02247
     Eigenvalues ---    0.02270   0.02389   0.14806   0.16000   0.16000
     Eigenvalues ---    0.16000   0.16000   0.16000   0.16003   0.16266
     Eigenvalues ---    0.17477   0.21631   0.22121   0.22567   0.23496
     Eigenvalues ---    0.23733   0.24528   0.24787   0.25000   0.25000
     Eigenvalues ---    0.25000   0.25110   0.26454   0.32004   0.34697
     Eigenvalues ---    0.35405   0.35517   0.35536   0.35638   0.35645
     Eigenvalues ---    0.35720   0.35927   0.36594   0.37491   0.39948
     Eigenvalues ---    0.40673   0.41094   0.41623   0.42719   0.43530
     Eigenvalues ---    0.44396   0.44668   0.47362   0.47576   0.48679
     Eigenvalues ---    0.50084   0.54530   0.54838   0.87232
 RFO step:  Lambda=-3.22848246D-05 EMin= 1.15145495D-02
 Quartic linear search produced a step of  0.05050.
 Iteration  1 RMS(Cart)=  0.00169590 RMS(Int)=  0.00000226
 Iteration  2 RMS(Cart)=  0.00000274 RMS(Int)=  0.00000038
 Iteration  3 RMS(Cart)=  0.00000000 RMS(Int)=  0.00000038
 ITry= 1 IFail=0 DXMaxC= 7.47D-03 DCOld= 1.00D+10 DXMaxT= 4.06D-01 DXLimC= 3.00D+00 Rises=F
 Variable       Old X    -DE/DX   Delta X   Delta X   Delta X     New X
                                 (Linear)    (Quad)   (Total)
    R1        2.65993  -0.00012   0.00051  -0.00014   0.00037   2.66030
    R2        2.61329   0.00023  -0.00069   0.00062  -0.00007   2.61322
    R3        2.04961   0.00012   0.00005   0.00031   0.00036   2.04997
    R4        2.63390  -0.00006  -0.00043   0.00008  -0.00035   2.63356
    R5        2.04455  -0.00017  -0.00003  -0.00051  -0.00053   2.04401
    R6        2.69014   0.00077   0.00026   0.00160   0.00186   2.69200
    R7        2.77895  -0.00001  -0.00036   0.00016  -0.00020   2.77874
    R8        2.64484  -0.00046  -0.00087  -0.00074  -0.00161   2.64323
    R9        2.72128   0.00027   0.00072   0.00045   0.00116   2.72244
   R10        2.65916   0.00023   0.00078   0.00047   0.00126   2.66042
   R11        2.05093  -0.00013   0.00001  -0.00038  -0.00037   2.05056
   R12        2.04561   0.00013  -0.00009   0.00044   0.00035   2.04596
   R13        2.72375   0.00085   0.00075   0.00194   0.00268   2.72644
   R14        2.48074  -0.00007  -0.00105  -0.00003  -0.00108   2.47966
   R15        2.76421  -0.00038  -0.00055  -0.00084  -0.00139   2.76282
   R16        2.37117  -0.00020   0.00046  -0.00024   0.00022   2.37140
   R17        2.68122   0.00103   0.00022   0.00233   0.00255   2.68377
   R18        2.63884  -0.00017  -0.00096   0.00004  -0.00093   2.63791
   R19        2.64321  -0.00020  -0.00035  -0.00026  -0.00060   2.64260
   R20        2.66309   0.00082   0.00094   0.00172   0.00265   2.66574
   R21        2.04143  -0.00011  -0.00002  -0.00032  -0.00033   2.04109
   R22        2.65782   0.00009   0.00058   0.00021   0.00079   2.65861
   R23        2.04378  -0.00013  -0.00005  -0.00036  -0.00041   2.04337
   R24        2.60752   0.00014  -0.00082   0.00047  -0.00035   2.60717
   R25        3.61872   0.00020  -0.00041   0.00148   0.00107   3.61979
   R26        2.04701   0.00012   0.00006   0.00033   0.00039   2.04740
   R27        1.83033  -0.00035   0.00011  -0.00067  -0.00056   1.82977
    A1        2.11230  -0.00027   0.00043  -0.00143  -0.00100   2.11130
    A2        2.08321  -0.00016  -0.00056  -0.00093  -0.00149   2.08171
    A3        2.08768   0.00043   0.00013   0.00236   0.00249   2.09017
    A4        2.10309   0.00030  -0.00037   0.00155   0.00118   2.10428
    A5        2.11481  -0.00053  -0.00013  -0.00298  -0.00311   2.11170
    A6        2.06528   0.00023   0.00050   0.00143   0.00193   2.06721
    A7        2.07153  -0.00019  -0.00007  -0.00090  -0.00097   2.07057
    A8        2.09796   0.00026   0.00009   0.00140   0.00149   2.09944
    A9        2.11370  -0.00006  -0.00002  -0.00050  -0.00052   2.11318
   A10        2.09619   0.00000   0.00048  -0.00005   0.00043   2.09662
   A11        2.05265   0.00049  -0.00031   0.00199   0.00168   2.05433
   A12        2.13435  -0.00049  -0.00018  -0.00194  -0.00212   2.13223
   A13        2.10308  -0.00001  -0.00031   0.00014  -0.00017   2.10291
   A14        2.12624   0.00022   0.00054   0.00109   0.00163   2.12787
   A15        2.05387  -0.00021  -0.00022  -0.00124  -0.00146   2.05241
   A16        2.08018   0.00018  -0.00016   0.00068   0.00052   2.08070
   A17        2.10934   0.00020   0.00035   0.00135   0.00170   2.11104
   A18        2.09367  -0.00038  -0.00020  -0.00203  -0.00223   2.09144
   A19        2.15554  -0.00079   0.00007  -0.00266  -0.00259   2.15295
   A20        2.12481   0.00016   0.00001   0.00028   0.00029   2.12510
   A21        2.00283   0.00063  -0.00008   0.00238   0.00230   2.00513
   A22        2.07181   0.00008   0.00053   0.00006   0.00060   2.07240
   A23        2.10260   0.00002  -0.00039   0.00029  -0.00011   2.10249
   A24        2.10878  -0.00010  -0.00014  -0.00035  -0.00049   2.10829
   A25        2.06472   0.00023  -0.00029   0.00098   0.00069   2.06542
   A26        2.10307  -0.00007  -0.00034  -0.00017  -0.00051   2.10257
   A27        2.11539  -0.00016   0.00062  -0.00081  -0.00019   2.11520
   A28        2.10795   0.00005   0.00001   0.00013   0.00014   2.10809
   A29        2.10842   0.00011   0.00016   0.00070   0.00085   2.10927
   A30        2.06682  -0.00016  -0.00016  -0.00083  -0.00099   2.06583
   A31        2.07241   0.00016  -0.00036   0.00113   0.00077   2.07318
   A32        2.09878   0.00037   0.00046   0.00219   0.00265   2.10143
   A33        2.11200  -0.00053  -0.00011  -0.00332  -0.00342   2.10858
   A34        2.10610   0.00039  -0.00039   0.00180   0.00141   2.10751
   A35        2.07239   0.00022   0.00047   0.00160   0.00207   2.07446
   A36        2.10469  -0.00061  -0.00008  -0.00340  -0.00348   2.10122
   A37        2.11186  -0.00014  -0.00020  -0.00061  -0.00081   2.11105
   A38        2.07553  -0.00046  -0.00037  -0.00165  -0.00202   2.07351
   A39        2.09580   0.00059   0.00057   0.00225   0.00283   2.09863
   A40        2.09380  -0.00008   0.00049  -0.00069  -0.00020   2.09361
   A41        2.09240  -0.00032  -0.00062  -0.00171  -0.00233   2.09007
   A42        2.09698   0.00040   0.00013   0.00240   0.00253   2.09951
   A43        1.97977  -0.00043   0.00121  -0.00361  -0.00240   1.97738
    D1        0.00000   0.00000   0.00000   0.00000   0.00000   0.00000
    D2        3.14159   0.00000   0.00000   0.00000   0.00000   3.14159
    D3        3.14159   0.00000   0.00000   0.00000   0.00000   3.14159
    D4        0.00000   0.00000   0.00000   0.00000   0.00000   0.00000
    D5        0.00000   0.00000   0.00000   0.00000   0.00000   0.00000
    D6       -3.14159   0.00000   0.00000   0.00000   0.00000  -3.14159
    D7       -3.14159   0.00000   0.00000   0.00000   0.00000  -3.14159
    D8        0.00000   0.00000   0.00000   0.00000   0.00000   0.00000
    D9        0.00000   0.00000   0.00000   0.00000   0.00000   0.00000
   D10        3.14159   0.00000   0.00000   0.00000   0.00000   3.14159
   D11        3.14159   0.00000   0.00000   0.00000   0.00000   3.14159
   D12       -0.00001   0.00000   0.00000   0.00000   0.00000   0.00000
   D13        0.00001   0.00000   0.00000   0.00000   0.00000   0.00001
   D14       -3.14158   0.00000   0.00000   0.00000   0.00000  -3.14158
   D15       -3.14158   0.00000   0.00000  -0.00001  -0.00001  -3.14158
   D16        0.00002   0.00000   0.00000  -0.00001  -0.00001   0.00001
   D17       -3.14159   0.00000   0.00000   0.00001   0.00001  -3.14158
   D18        0.00001   0.00000   0.00000  -0.00003  -0.00003  -0.00002
   D19        0.00000   0.00000   0.00000   0.00002   0.00002   0.00001
   D20       -3.14158   0.00000   0.00000  -0.00003  -0.00003   3.14157
   D21       -0.00001   0.00000   0.00000   0.00000   0.00000  -0.00001
   D22        3.14157   0.00000   0.00000   0.00001   0.00001   3.14158
   D23        3.14158   0.00000   0.00000   0.00001   0.00001   3.14158
   D24       -0.00002   0.00000   0.00000   0.00001   0.00001  -0.00002
   D25       -0.00003   0.00000   0.00000   0.00000   0.00000  -0.00003
   D26        3.14156   0.00000   0.00000   0.00001   0.00001   3.14157
   D27        3.14157   0.00000   0.00000  -0.00001  -0.00001   3.14156
   D28       -0.00003   0.00000   0.00000   0.00001   0.00001  -0.00002
   D29        0.00000   0.00000   0.00000   0.00000   0.00000   0.00000
   D30       -3.14159   0.00000   0.00000   0.00000   0.00000  -3.14159
   D31       -3.14158   0.00000   0.00000   0.00000   0.00000  -3.14158
   D32        0.00001   0.00000   0.00000   0.00000   0.00000   0.00001
   D33        0.00002   0.00000   0.00000   0.00001   0.00001   0.00003
   D34       -3.14158   0.00000   0.00000   0.00001   0.00001  -3.14157
   D35       -3.14157   0.00000   0.00000  -0.00001  -0.00001  -3.14158
   D36        0.00002   0.00000   0.00000  -0.00001  -0.00001   0.00001
   D37       -0.00004   0.00000   0.00000   0.00001   0.00001  -0.00002
   D38        3.14155   0.00000   0.00000   0.00003   0.00003   3.14158
   D39       -0.00001   0.00000   0.00000  -0.00001  -0.00001  -0.00002
   D40        3.14159   0.00000   0.00000  -0.00001  -0.00001   3.14158
   D41        3.14158   0.00000   0.00000   0.00003   0.00003  -3.14158
   D42       -0.00001   0.00000   0.00000   0.00003   0.00003   0.00002
   D43        0.00000   0.00000   0.00000   0.00000   0.00000   0.00000
   D44        3.14159   0.00000   0.00000   0.00000   0.00000   3.14159
   D45       -3.14159   0.00000   0.00000   0.00000   0.00000  -3.14159
   D46        0.00000   0.00000   0.00000   0.00000   0.00000   0.00000
   D47       -3.14159   0.00000   0.00000   0.00000   0.00000  -3.14159
   D48        0.00000   0.00000   0.00000   0.00000   0.00000   0.00000
   D49        0.00000   0.00000   0.00000   0.00000   0.00000   0.00000
   D50        3.14159   0.00000   0.00000   0.00000   0.00000   3.14159
   D51        3.14159   0.00000   0.00000   0.00000   0.00000   3.14159
   D52        0.00000   0.00000   0.00000   0.00000   0.00000   0.00000
   D53        0.00000   0.00000   0.00000   0.00000   0.00000   0.00000
   D54       -3.14159   0.00000   0.00000   0.00000   0.00000  -3.14159
   D55        0.00000   0.00000   0.00000   0.00000   0.00000   0.00000
   D56       -3.14159   0.00000   0.00000   0.00000   0.00000  -3.14159
   D57       -3.14159   0.00000   0.00000   0.00000   0.00000  -3.14159
   D58        0.00000   0.00000   0.00000   0.00000   0.00000   0.00000
   D59        0.00000   0.00000   0.00000   0.00000   0.00000   0.00000
   D60        3.14159   0.00000   0.00000   0.00000   0.00000   3.14159
   D61        3.14159   0.00000   0.00000   0.00000   0.00000   3.14159
   D62        0.00000   0.00000   0.00000   0.00000   0.00000   0.00000
   D63        0.00000   0.00000   0.00000   0.00000   0.00000   0.00000
   D64        3.14159   0.00000   0.00000   0.00000   0.00000   3.14159
   D65       -3.14159   0.00000   0.00000   0.00000   0.00000  -3.14159
   D66        0.00000   0.00000   0.00000   0.00000   0.00000   0.00000
         Item               Value     Threshold  Converged?
 Maximum Force            0.001031     0.000450     NO 
 RMS     Force            0.000255     0.000300     YES
 Maximum Displacement     0.007473     0.001800     NO 
 RMS     Displacement     0.001695     0.001200     NO 
 Predicted change in Energy=-1.781200D-05
 Lowest energy point so far.  Saving SCF results.
 GradGradGradGradGradGradGradGradGradGradGradGradGradGradGradGradGradGrad

 Leave Link  103 at Fri Jan 10 18:04:52 2020, MaxMem=   134217728 cpu:         1.0
 (Enter E:\Gaussian\G09W\l202.exe)
                          Input orientation:                          
 ---------------------------------------------------------------------
 Center     Atomic      Atomic             Coordinates (Angstroms)
 Number     Number       Type             X           Y           Z
 ---------------------------------------------------------------------
      1          6           0       -5.079956    0.056495   -0.000011
      2          6           0       -4.038469    1.003658    0.000002
      3          6           0       -2.706813    0.592730    0.000010
      4          6           0       -2.423164   -0.803289    0.000006
      5          6           0       -3.468929   -1.732179   -0.000012
      6          6           0       -4.808618   -1.299481   -0.000020
      7          1           0       -6.109041    0.399668   -0.000016
      8          1           0       -4.250284    2.064360    0.000007
      9          1           0       -3.286195   -2.801791   -0.000029
     10          1           0       -5.609785   -2.027709   -0.000033
     11          6           0       -1.039847   -1.205683    0.000024
     12          6           0       -1.623752    1.587313    0.000019
     13          6           0        0.058458   -0.270106    0.000009
     14          6           0       -0.238900    1.118607    0.000006
     15          6           0        1.377486   -0.727021    0.000003
     16          6           0        0.825260    2.025856   -0.000004
     17          6           0        2.423998    0.218888   -0.000010
     18          1           0        1.589069   -1.786194    0.000007
     19          6           0        2.157080    1.572477   -0.000013
     20          1           0        0.607993    3.085109   -0.000003
     21          1           0        2.969175    2.289655   -0.000021
     22         35           0        4.234197   -0.407496   -0.000020
     23          8           0       -1.886749    2.814333   -0.000001
     24          8           0       -0.688297   -2.469896    0.000044
     25          1           0       -1.442533   -3.077087    0.000065
 ---------------------------------------------------------------------
                    Distance matrix (angstroms):
                    1          2          3          4          5
     1  C    0.000000
     2  C    1.407768   0.000000
     3  C    2.432972   1.393618   0.000000
     4  C    2.792449   2.423689   1.424544   0.000000
     5  C    2.407230   2.794491   2.446635   1.398736   0.000000
     6  C    1.382857   2.428493   2.828082   2.436514   1.407833
     7  H    1.084797   2.156866   3.407701   3.877215   3.393370
     8  H    2.172528   1.081645   2.132604   3.400262   3.876110
     9  H    3.374518   3.879092   3.443611   2.176886   1.085109
    10  H    2.150494   3.414414   3.910748   3.413761   2.161158
    11  C    4.232678   3.724637   2.452155   1.440654   2.485485
    12  C    3.780046   2.484253   1.470448   2.520722   3.797856
    13  C    5.148783   4.290372   2.896759   2.538253   3.818392
    14  C    4.956198   3.801308   2.523320   2.909414   4.308140
    15  C    6.504801   5.685756   4.292230   3.801414   4.949553
    16  C    6.224946   4.969985   3.811743   4.307704   5.706389
    17  C    7.505710   6.509942   5.144412   4.953768   6.207516
    18  H    6.918915   6.281119   4.910589   4.130873   5.058286
    19  C    7.394112   6.221607   4.961589   5.159738   6.524779
    20  H    6.444010   5.091371   4.147276   4.930269   6.310908
    21  H    8.353174   7.124666   5.924221   6.216399   7.591069
    22  Br   9.325702   8.392161   7.012708   6.669115   7.816197
    23  O    4.219270   2.812196   2.368127   3.657175   4.813945
    24  O    5.066489   4.825892   3.667981   2.405689   2.876828
    25  H    4.801060   4.836462   3.881490   2.476246   2.432089
                    6          7          8          9         10
     6  C    0.000000
     7  H    2.139674   0.000000
     8  H    3.409863   2.495231   0.000000
     9  H    2.138856   4.268231   4.960736   0.000000
    10  H    1.082675   2.478188   4.311992   2.449138   0.000000
    11  C    3.769938   5.317318   4.582586   2.755655   4.643281
    12  C    4.298483   4.639862   2.669503   4.693395   5.381157
    13  C    4.974741   6.203760   4.900510   4.194775   5.934489
    14  C    5.170055   5.914002   4.121366   4.965433   6.224606
    15  C    6.212535   7.570832   6.282007   5.104369   7.107302
    16  C    6.542052   7.122430   5.075690   6.341154   7.605340
    17  C    7.390276   8.534953   6.924725   6.459938   8.341995
    18  H    6.416174   8.002430   6.994628   4.979923   7.202904
    19  C    7.534527   8.348906   6.426218   6.983084   8.560698
    20  H    6.968810   7.233958   4.964352   7.058349   8.049950
    21  H    8.565977   9.272866   7.222974   8.065511   9.604072
    22  Br   9.086701  10.374684   8.837222   7.892334   9.976426
    23  O    5.045868   4.863986   2.479669   5.787858   6.107894
    24  O    4.283330   6.133421   5.766041   2.619013   4.941313
    25  H    3.806627   5.819288   5.858153   1.864102   4.297346
                   11         12         13         14         15
    11  C    0.000000
    12  C    2.853380   0.000000
    13  C    1.442768   2.505960   0.000000
    14  C    2.458423   1.462019   1.420192   0.000000
    15  C    2.464268   3.789930   1.395924   2.453374   0.000000
    16  C    3.731148   2.487966   2.420624   1.398405   2.807718
    17  C    3.745348   4.272805   2.415552   2.810786   1.410650
    18  H    2.692247   4.658623   2.154366   3.432104   1.080100
    19  C    4.235389   3.780861   2.792727   2.438590   2.428057
    20  H    4.596333   2.687765   3.399920   2.141112   3.889017
    21  H    5.318802   4.646317   3.876164   3.415128   3.410837
    22  Br   5.334102   6.188281   4.177998   4.726265   2.874525
    23  O    4.108257   1.254888   3.646587   2.364507   4.816266
    24  O    1.312182   4.163655   2.323084   3.616532   2.702789
    25  H    1.914238   4.667920   3.183099   4.364926   3.670874
                   16         17         18         19         20
    16  C    0.000000
    17  C    2.412694   0.000000
    18  H    3.887818   2.171972   0.000000
    19  C    1.406875   1.379655   3.406363   0.000000
    20  H    1.081306   3.393095   4.969115   2.165116   0.000000
    21  H    2.160084   2.141330   4.303166   1.083440   2.491571
    22  Br   4.188323   1.915510   2.982870   2.869618   5.034644
    23  O    2.824303   5.031786   5.765948   4.230220   2.509394
    24  O    4.743694   4.112899   2.377781   4.943374   5.704248
    25  H    5.584166   5.080701   3.294998   5.880108   6.494407
                   21         22         23         24         25
    21  H    0.000000
    22  Br   2.979077   0.000000
    23  O    4.884187   6.917092   0.000000
    24  O    6.002535   5.337081   5.418428   0.000000
    25  H    6.947308   6.273116   5.908144   0.968274   0.000000
 Stoichiometry    C14H8BrO2(2)
 Framework group  C1[X(C14H8BrO2)]
 Deg. of freedom    69
 Full point group                 C1      NOp   1
 RotChk:  IX=0 Diff= 5.51D-04
 Largest Abelian subgroup         C1      NOp   1
 Largest concise Abelian subgroup C1      NOp   1
                         Standard orientation:                         
 ---------------------------------------------------------------------
 Center     Atomic      Atomic             Coordinates (Angstroms)
 Number     Number       Type             X           Y           Z
 ---------------------------------------------------------------------
      1          6           0       -5.083892    0.050601   -0.000009
      2          6           0       -4.044198    0.999731    0.000004
      3          6           0       -2.711767    0.591321    0.000012
      4          6           0       -2.425480   -0.804159    0.000008
      5          6           0       -3.469488   -1.735024   -0.000010
      6          6           0       -4.809992   -1.304860   -0.000018
      7          1           0       -6.113624    0.391829   -0.000014
      8          1           0       -4.258017    2.060031    0.000009
      9          1           0       -3.284732   -2.804289   -0.000026
     10          1           0       -5.609781   -2.034601   -0.000031
     11          6           0       -1.041405   -1.203939    0.000027
     12          6           0       -1.630588    1.587949    0.000021
     13          6           0        0.055130   -0.266287    0.000011
     14          6           0       -0.244852    1.121861    0.000008
     15          6           0        1.375019   -0.720708    0.000005
     16          6           0        0.817591    2.031119   -0.000002
     17          6           0        2.419741    0.227177   -0.000007
     18          1           0        1.588603   -1.779480    0.000009
     19          6           0        2.150266    1.580259   -0.000011
     20          1           0        0.598323    3.089961   -0.000001
     21          1           0        2.961004    2.298970   -0.000019
     22         35           0        4.231121   -0.395784   -0.000017
     23          8           0       -1.895903    2.814470    0.000001
     24          8           0       -0.687466   -2.467484    0.000046
     25          1           0       -1.440553   -3.076100    0.000067
 ---------------------------------------------------------------------
 Rotational constants (GHZ):      0.9897467      0.1760689      0.1494778
 Leave Link  202 at Fri Jan 10 18:04:52 2020, MaxMem=   134217728 cpu:         0.0
 (Enter E:\Gaussian\G09W\l301.exe)
 Standard basis: 6-311G(d) (5D, 7F)
 Ernie: Thresh=  0.10000D-02 Tol=  0.10000D-05 Strict=F.
 There are   375 symmetry adapted cartesian basis functions of A   symmetry.
 There are   356 symmetry adapted basis functions of A   symmetry.
   356 basis functions,   642 primitive gaussians,   375 cartesian basis functions
    72 alpha electrons       71 beta electrons
       nuclear repulsion energy      1391.4897785789 Hartrees.
 IExCor=  402 DFT=T Ex+Corr=B3LYP ExCW=0 ScaHFX=  0.200000
 ScaDFX=  0.800000  0.720000  1.000000  0.810000 ScalE2=  1.000000  1.000000
 IRadAn=      0 IRanWt=     -1 IRanGd=            0 ICorTp=0 IEmpDi=141
 NAtoms=   25 NActive=   25 NUniq=   25 SFac= 1.00D+00 NAtFMM=   60 NAOKFM=F Big=F
 Integral buffers will be    262144 words long.
 Raffenetti 2 integral format.
 Two-electron integral symmetry is turned on.
 R6Disp:  Grimme-D3(BJ) Dispersion energy=       -0.0633034034 Hartrees.
 Nuclear repulsion after empirical dispersion term =     1391.4264751755 Hartrees.
 ------------------------------------------------------------------------------
 Polarizable Continuum Model (PCM)
 =================================
 Model                : PCM (using non-symmetric T matrix).
 Atomic radii         : UFF (Universal Force Field).
 Polarization charges : Total charges.
 Charge compensation  : None.
 Solution method      : On-the-fly selection.
 Cavity type          : Scaled VdW (van der Waals Surface) (Alpha=1.100).
 Cavity algorithm     : GePol (No added spheres)
                        Default sphere list used, NSphG=   25.
                        Lebedev-Laikov grids with approx.  5.0 points / Ang**2.
                        Smoothing algorithm: Karplus/York (Gamma=1.0000).
                        Polarization charges: spherical gaussians, with
                                              point-specific exponents (IZeta= 3).
                        Self-potential: point-specific (ISelfS= 7).
                        Self-field    : sphere-specific E.n sum rule (ISelfD= 2).
 1st derivatives      : Analytical E(r).r(x)/FMM algorithm (CHGder, D1EAlg=3).
                        Cavity 1st derivative terms included.
 Solvent              : Acetonitrile, Eps=  35.688000 Eps(inf)=   1.806874
 ------------------------------------------------------------------------------
 GePol: Number of generator spheres                  =      25
 GePol: Total number of spheres                      =      25
 GePol: Number of exposed spheres                    =      25 (100.00%)
 GePol: Number of points                             =    2193
 GePol: Average weight of points                     =       0.13
 GePol: Minimum weight of points                     =   0.38D-10
 GePol: Maximum weight of points                     =    0.20577
 GePol: Number of points with low weight             =     137
 GePol: Fraction of low-weight points (<1% of avg)   =       6.25%
 GePol: Cavity surface area                          =    281.118 Ang**2
 GePol: Cavity volume                                =    307.957 Ang**3
 Leave Link  301 at Fri Jan 10 18:04:52 2020, MaxMem=   134217728 cpu:         0.0
 (Enter E:\Gaussian\G09W\l302.exe)
 NPDir=0 NMtPBC=     1 NCelOv=     1 NCel=       1 NClECP=     1 NCelD=      1
         NCelK=      1 NCelE2=     1 NClLst=     1 CellRange=     0.0.
 One-electron integrals computed using PRISM.
 NBasis=   356 RedAO= T EigKep=  8.65D-05  NBF=   356
 NBsUse=   356 1.00D-06 EigRej= -1.00D+00 NBFU=   356
 Precomputing XC quadrature grid using
 IXCGrd= 4 IRadAn=           0 IRanWt=          -1 IRanGd=           0 AccXCQ= 0.00D+00.
 Generated NRdTot=       0 NPtTot=           0 NUsed=           0 NTot=          16
 NSgBfM=   366   366   366   366   366 MxSgAt=    25 MxSgA2=    25.
 Leave Link  302 at Fri Jan 10 18:04:54 2020, MaxMem=   134217728 cpu:         2.0
 (Enter E:\Gaussian\G09W\l308.exe)
 Leave Link  308 at Fri Jan 10 18:04:54 2020, MaxMem=   134217728 cpu:         0.0
 (Enter E:\Gaussian\G09W\l303.exe)
 DipDrv:  MaxL=1.
 Leave Link  303 at Fri Jan 10 18:04:55 2020, MaxMem=   134217728 cpu:         0.0
 (Enter E:\Gaussian\G09W\l401.exe)
 Initial guess from the checkpoint file:  "E:\Gaussian file\2-BrHAQ excited opt.chk"
 B after Tr=     0.000000    0.000000    0.000000
         Rot=    1.000000    0.000000   -0.000001   -0.000041 Ang=   0.00 deg.
 Guess basis will be translated and rotated to current coordinates.
 JPrj=2 DoOrth=T DoCkMO=T.
 Initial guess <Sx>= 0.0000 <Sy>= 0.0000 <Sz>= 0.5000 <S**2>= 0.7731 S= 0.5115
 Leave Link  401 at Fri Jan 10 18:04:57 2020, MaxMem=   134217728 cpu:         2.0
 (Enter E:\Gaussian\G09W\l502.exe)
 UHF open shell SCF:
 Using DIIS extrapolation, IDIIS=  1040.
 Integral symmetry usage will be decided dynamically.
 IVT=      444890 IEndB=      444890 NGot=   134217728 MDV=   133930479
 LenX=   133930479 LenY=   133789413
 Requested convergence on RMS density matrix=1.00D-08 within 128 cycles.
 Requested convergence on MAX density matrix=1.00D-06.
 Requested convergence on             energy=1.00D-06.
 No special actions if energy rises.
 Fock matrices will be formed incrementally for  20 cycles.

 Cycle   1  Pass 1  IDiag  1:
 FoFJK:  IHMeth= 1 ICntrl=       0 DoSepK=F KAlg= 0 I1Cent=   0 FoldK=F
 IRaf= 780000000 NMat=   1 IRICut=       1 DoRegI=T DoRafI=F ISym2E= 0.
 FoFCou: FMM=F IPFlag=           0 FMFlag=      100000 FMFlg1=           0
         NFxFlg=           0 DoJE=F BraDBF=F KetDBF=F FulRan=T
         wScrn=  0.000000 ICntrl=       0 IOpCl=  1 I1Cent=           0 NGrid=           0
         NMat0=    1 NMatS0=      1 NMatT0=    0 NMatD0=    1 NMtDS0=    0 NMtDT0=    0
 Symmetry not used in FoFCou.
 Inv3:  Mode=1 IEnd=    14427747.
 Iteration    1 A*A^-1 deviation from unit magnitude is 2.44D-15 for     86.
 Iteration    1 A*A^-1 deviation from orthogonality  is 2.33D-15 for    753    499.
 Iteration    1 A^-1*A deviation from unit magnitude is 2.22D-15 for    211.
 Iteration    1 A^-1*A deviation from orthogonality  is 2.08D-12 for   2010   1552.
 E= -3263.11845834768    
 DIIS: error= 1.04D-04 at cycle   1 NSaved=   1.
 NSaved= 1 IEnMin= 1 EnMin= -3263.11845834768     IErMin= 1 ErrMin= 1.04D-04
 ErrMax= 1.04D-04  0.00D+00 EMaxC= 1.00D-01 BMatC= 3.88D-05 BMatP= 3.88D-05
 IDIUse=3 WtCom= 9.99D-01 WtEn= 1.04D-03
 Coeff-Com:  0.100D+01
 Coeff-En:   0.100D+01
 Coeff:      0.100D+01
 Gap=     0.721 Goal=   None    Shift=    0.000
 Gap=     0.796 Goal=   None    Shift=    0.000
 RMSDP=2.67D-05 MaxDP=1.12D-03              OVMax= 1.03D-03

 Cycle   2  Pass 1  IDiag  1:
 RMSU=  2.67D-05    CP:  1.00D+00
 E= -3263.11847022124     Delta-E=       -0.000011873552 Rises=F Damp=F
 DIIS: error= 7.46D-05 at cycle   2 NSaved=   2.
 NSaved= 2 IEnMin= 2 EnMin= -3263.11847022124     IErMin= 2 ErrMin= 7.46D-05
 ErrMax= 7.46D-05  0.00D+00 EMaxC= 1.00D-01 BMatC= 6.52D-06 BMatP= 3.88D-05
 IDIUse=1 WtCom= 1.00D+00 WtEn= 0.00D+00
 Coeff-Com:  0.176D+00 0.824D+00
 Coeff:      0.176D+00 0.824D+00
 Gap=     0.100 Goal=   None    Shift=    0.000
 Gap=     0.140 Goal=   None    Shift=    0.000
 RMSDP=1.14D-05 MaxDP=4.44D-04 DE=-1.19D-05 OVMax= 6.43D-04

 Cycle   3  Pass 1  IDiag  1:
 RMSU=  1.10D-05    CP:  1.00D+00  9.13D-01
 E= -3263.11846948238     Delta-E=        0.000000738857 Rises=F Damp=F
 DIIS: error= 1.02D-04 at cycle   3 NSaved=   3.
 NSaved= 3 IEnMin= 2 EnMin= -3263.11847022124     IErMin= 2 ErrMin= 7.46D-05
 ErrMax= 1.02D-04  0.00D+00 EMaxC= 1.00D-01 BMatC= 1.11D-05 BMatP= 6.52D-06
 IDIUse=3 WtCom= 4.97D-01 WtEn= 5.03D-01
 Coeff-Com: -0.184D-01 0.574D+00 0.444D+00
 Coeff-En:   0.000D+00 0.591D+00 0.409D+00
 Coeff:     -0.917D-02 0.583D+00 0.427D+00
 Gap=     0.100 Goal=   None    Shift=    0.000
 Gap=     0.140 Goal=   None    Shift=    0.000
 RMSDP=8.41D-06 MaxDP=3.54D-04 DE= 7.39D-07 OVMax= 3.57D-04

 Cycle   4  Pass 1  IDiag  1:
 RMSU=  2.24D-06    CP:  1.00D+00  1.01D+00  3.10D-01
 E= -3263.11847151935     Delta-E=       -0.000002036975 Rises=F Damp=F
 DIIS: error= 1.61D-05 at cycle   4 NSaved=   4.
 NSaved= 4 IEnMin= 4 EnMin= -3263.11847151935     IErMin= 4 ErrMin= 1.61D-05
 ErrMax= 1.61D-05  0.00D+00 EMaxC= 1.00D-01 BMatC= 2.17D-07 BMatP= 6.52D-06
 IDIUse=1 WtCom= 1.00D+00 WtEn= 0.00D+00
 Coeff-Com: -0.158D-01 0.289D+00 0.230D+00 0.496D+00
 Coeff:     -0.158D-01 0.289D+00 0.230D+00 0.496D+00
 Gap=     0.100 Goal=   None    Shift=    0.000
 Gap=     0.140 Goal=   None    Shift=    0.000
 RMSDP=1.36D-06 MaxDP=6.20D-05 DE=-2.04D-06 OVMax= 7.88D-05

 Cycle   5  Pass 1  IDiag  1:
 RMSU=  8.93D-07    CP:  1.00D+00  1.00D+00  3.92D-01  8.23D-01
 E= -3263.11847155827     Delta-E=       -0.000000038913 Rises=F Damp=F
 DIIS: error= 7.41D-06 at cycle   5 NSaved=   5.
 NSaved= 5 IEnMin= 5 EnMin= -3263.11847155827     IErMin= 5 ErrMin= 7.41D-06
 ErrMax= 7.41D-06  0.00D+00 EMaxC= 1.00D-01 BMatC= 4.79D-08 BMatP= 2.17D-07
 IDIUse=1 WtCom= 1.00D+00 WtEn= 0.00D+00
 Coeff-Com: -0.569D-02 0.622D-01 0.515D-01 0.322D+00 0.570D+00
 Coeff:     -0.569D-02 0.622D-01 0.515D-01 0.322D+00 0.570D+00
 Gap=     0.100 Goal=   None    Shift=    0.000
 Gap=     0.140 Goal=   None    Shift=    0.000
 RMSDP=5.91D-07 MaxDP=2.66D-05 DE=-3.89D-08 OVMax= 4.12D-05

 Cycle   6  Pass 1  IDiag  1:
 RMSU=  2.95D-07    CP:  1.00D+00  1.00D+00  3.65D-01  8.25D-01  5.66D-01
 E= -3263.11847156814     Delta-E=       -0.000000009872 Rises=F Damp=F
 DIIS: error= 1.53D-06 at cycle   6 NSaved=   6.
 NSaved= 6 IEnMin= 6 EnMin= -3263.11847156814     IErMin= 6 ErrMin= 1.53D-06
 ErrMax= 1.53D-06  0.00D+00 EMaxC= 1.00D-01 BMatC= 2.17D-09 BMatP= 4.79D-08
 IDIUse=1 WtCom= 1.00D+00 WtEn= 0.00D+00
 Coeff-Com: -0.130D-02 0.382D-02 0.366D-02 0.106D+00 0.244D+00 0.644D+00
 Coeff:     -0.130D-02 0.382D-02 0.366D-02 0.106D+00 0.244D+00 0.644D+00
 Gap=     0.100 Goal=   None    Shift=    0.000
 Gap=     0.140 Goal=   None    Shift=    0.000
 RMSDP=1.11D-07 MaxDP=4.08D-06 DE=-9.87D-09 OVMax= 2.15D-05

 Cycle   7  Pass 1  IDiag  1:
 RMSU=  8.43D-08    CP:  1.00D+00  1.01D+00  3.65D-01  8.50D-01  6.16D-01
                    CP:  9.63D-01
 E= -3263.11847156890     Delta-E=       -0.000000000759 Rises=F Damp=F
 DIIS: error= 1.09D-06 at cycle   7 NSaved=   7.
 NSaved= 7 IEnMin= 7 EnMin= -3263.11847156890     IErMin= 7 ErrMin= 1.09D-06
 ErrMax= 1.09D-06  0.00D+00 EMaxC= 1.00D-01 BMatC= 6.56D-10 BMatP= 2.17D-09
 IDIUse=1 WtCom= 1.00D+00 WtEn= 0.00D+00
 Coeff-Com:  0.418D-03-0.102D-01-0.855D-02-0.348D-02 0.232D-01 0.356D+00
 Coeff-Com:  0.642D+00
 Coeff:      0.418D-03-0.102D-01-0.855D-02-0.348D-02 0.232D-01 0.356D+00
 Coeff:      0.642D+00
 Gap=     0.100 Goal=   None    Shift=    0.000
 Gap=     0.140 Goal=   None    Shift=    0.000
 RMSDP=5.60D-08 MaxDP=1.96D-06 DE=-7.59D-10 OVMax= 1.37D-05

 Cycle   8  Pass 1  IDiag  1:
 RMSU=  4.31D-08    CP:  1.00D+00  1.01D+00  3.65D-01  8.56D-01  6.12D-01
                    CP:  1.07D+00  1.08D+00
 E= -3263.11847156912     Delta-E=       -0.000000000228 Rises=F Damp=F
 DIIS: error= 3.73D-07 at cycle   8 NSaved=   8.
 NSaved= 8 IEnMin= 8 EnMin= -3263.11847156912     IErMin= 8 ErrMin= 3.73D-07
 ErrMax= 3.73D-07  0.00D+00 EMaxC= 1.00D-01 BMatC= 1.01D-10 BMatP= 6.56D-10
 IDIUse=1 WtCom= 1.00D+00 WtEn= 0.00D+00
 Coeff-Com:  0.399D-03-0.404D-02-0.392D-02-0.225D-01-0.407D-01-0.420D-02
 Coeff-Com:  0.229D+00 0.846D+00
 Coeff:      0.399D-03-0.404D-02-0.392D-02-0.225D-01-0.407D-01-0.420D-02
 Coeff:      0.229D+00 0.846D+00
 Gap=     0.100 Goal=   None    Shift=    0.000
 Gap=     0.140 Goal=   None    Shift=    0.000
 RMSDP=3.90D-08 MaxDP=1.57D-06 DE=-2.28D-10 OVMax= 8.85D-06

 Cycle   9  Pass 1  IDiag  1:
 RMSU=  2.05D-08    CP:  1.00D+00  1.01D+00  3.64D-01  8.58D-01  6.14D-01
                    CP:  1.14D+00  1.34D+00  1.23D+00
 E= -3263.11847156931     Delta-E=       -0.000000000184 Rises=F Damp=F
 DIIS: error= 3.41D-07 at cycle   9 NSaved=   9.
 NSaved= 9 IEnMin= 9 EnMin= -3263.11847156931     IErMin= 9 ErrMin= 3.41D-07
 ErrMax= 3.41D-07  0.00D+00 EMaxC= 1.00D-01 BMatC= 3.80D-11 BMatP= 1.01D-10
 IDIUse=1 WtCom= 1.00D+00 WtEn= 0.00D+00
 Coeff-Com:  0.389D-04 0.168D-02 0.889D-03-0.916D-02-0.303D-01-0.115D+00
 Coeff-Com: -0.102D+00 0.428D+00 0.827D+00
 Coeff:      0.389D-04 0.168D-02 0.889D-03-0.916D-02-0.303D-01-0.115D+00
 Coeff:     -0.102D+00 0.428D+00 0.827D+00
 Gap=     0.100 Goal=   None    Shift=    0.000
 Gap=     0.140 Goal=   None    Shift=    0.000
 RMSDP=2.56D-08 MaxDP=1.29D-06 DE=-1.84D-10 OVMax= 6.94D-06

 Cycle  10  Pass 1  IDiag  1:
 RMSU=  1.23D-08    CP:  1.00D+00  1.01D+00  3.64D-01  8.60D-01  6.16D-01
                    CP:  1.17D+00  1.49D+00  1.58D+00  1.07D+00
 E= -3263.11847156936     Delta-E=       -0.000000000050 Rises=F Damp=F
 DIIS: error= 1.43D-07 at cycle  10 NSaved=  10.
 NSaved=10 IEnMin=10 EnMin= -3263.11847156936     IErMin=10 ErrMin= 1.43D-07
 ErrMax= 1.43D-07  0.00D+00 EMaxC= 1.00D-01 BMatC= 1.23D-11 BMatP= 3.80D-11
 IDIUse=1 WtCom= 1.00D+00 WtEn= 0.00D+00
 Coeff-Com: -0.687D-04 0.181D-02 0.133D-02 0.832D-03-0.737D-02-0.579D-01
 Coeff-Com: -0.115D+00 0.761D-02 0.459D+00 0.710D+00
 Coeff:     -0.687D-04 0.181D-02 0.133D-02 0.832D-03-0.737D-02-0.579D-01
 Coeff:     -0.115D+00 0.761D-02 0.459D+00 0.710D+00
 Gap=     0.100 Goal=   None    Shift=    0.000
 Gap=     0.140 Goal=   None    Shift=    0.000
 RMSDP=1.23D-08 MaxDP=6.24D-07 DE=-5.00D-11 OVMax= 2.07D-06

 Cycle  11  Pass 1  IDiag  1:
 RMSU=  5.61D-09    CP:  1.00D+00  1.01D+00  3.64D-01  8.60D-01  6.12D-01
                    CP:  1.18D+00  1.54D+00  1.69D+00  1.35D+00  1.03D+00
 E= -3263.11847156935     Delta-E=        0.000000000013 Rises=F Damp=F
 DIIS: error= 7.04D-08 at cycle  11 NSaved=  11.
 NSaved=11 IEnMin=10 EnMin= -3263.11847156936     IErMin=11 ErrMin= 7.04D-08
 ErrMax= 7.04D-08  0.00D+00 EMaxC= 1.00D-01 BMatC= 2.34D-12 BMatP= 1.23D-11
 IDIUse=1 WtCom= 1.00D+00 WtEn= 0.00D+00
 Coeff-Com: -0.458D-04 0.510D-03 0.443D-03 0.293D-02 0.375D-02 0.156D-02
 Coeff-Com: -0.289D-01-0.951D-01 0.138D-01 0.331D+00 0.770D+00
 Coeff:     -0.458D-04 0.510D-03 0.443D-03 0.293D-02 0.375D-02 0.156D-02
 Coeff:     -0.289D-01-0.951D-01 0.138D-01 0.331D+00 0.770D+00
 Gap=     0.100 Goal=   None    Shift=    0.000
 Gap=     0.140 Goal=   None    Shift=    0.000
 RMSDP=4.79D-09 MaxDP=2.77D-07 DE= 1.27D-11 OVMax= 1.07D-06

 Error on total polarization charges =  0.01435
 SCF Done:  E(UB3LYP) =  -3263.11847157     A.U. after   11 cycles
            NFock= 11  Conv=0.48D-08     -V/T= 2.0018
 <Sx>= 0.0000 <Sy>= 0.0000 <Sz>= 0.5000 <S**2>= 0.7731 S= 0.5115
 <L.S>= 0.000000000000E+00
 KE= 3.257374196083D+03 PE=-1.054109075471D+04 EE= 2.629171611886D+03
 Annihilation of the first spin contaminant:
 S**2 before annihilation     0.7731,   after     0.7504
 Leave Link  502 at Fri Jan 10 18:19:48 2020, MaxMem=   134217728 cpu:       891.0
 (Enter E:\Gaussian\G09W\l801.exe)
 DoSCS=F DFT=T ScalE2(SS,OS)=  1.000000  1.000000
 ExpMin= 1.03D-01 ExpMax= 4.40D+05 ExpMxC= 1.51D+04 IAcc=3 IRadAn=         5 AccDes= 0.00D+00
 HarFok:  IExCor=  205 AccDes= 0.00D+00 IRadAn=         5 IDoV=-2 UseB2=F ITyADJ=14
 ICtDFT= 12500011 ScaDFX=  1.000000  1.000000  1.000000  1.000000
 Largest valence mixing into a core orbital is  2.26D-04
 Largest core mixing into a valence orbital is  1.80D-05
 Largest valence mixing into a core orbital is  2.26D-04
 Largest core mixing into a valence orbital is  1.91D-05
 Range of M.O.s used for correlation:    31   356
 NBasis=   356 NAE=    72 NBE=    71 NFC=    30 NFV=     0
 NROrb=    326 NOA=    42 NOB=    41 NVA=   284 NVB=   285

 **** Warning!!: The largest alpha MO coefficient is  0.21214086D+02


 **** Warning!!: The smallest alpha delta epsilon is  0.99818308D-01


 **** Warning!!: The largest beta MO coefficient is  0.21207926D+02

 Leave Link  801 at Fri Jan 10 18:19:50 2020, MaxMem=   134217728 cpu:         2.0
 (Enter E:\Gaussian\G09W\l914.exe)
 UHF ground state
 MDV=   134217728 DFT=T DoStab=F Mixed=T DoRPA=T DoScal=F NonHer=T
 NEqPCM:  Using equilibrium solvation (IEInf=0, Eps=  35.6880, EpsInf=   1.8069)
 Making orbital integer symmetry assigments:
 Orbital symmetries:
 Alpha Orbitals:
       Occupied  (A) (A) (A) (A) (A) (A) (A) (A) (A) (A) (A) (A)
                 (A) (A) (A) (A) (A) (A) (A) (A) (A) (A) (A) (A)
                 (A) (A) (A) (A) (A) (A) (A) (A) (A) (A) (A) (A)
                 (A) (A) (A) (A) (A) (A) (A) (A) (A) (A) (A) (A)
                 (A) (A) (A) (A) (A) (A) (A) (A) (A) (A) (A) (A)
                 (A) (A) (A) (A) (A) (A) (A) (A) (A) (A) (A) (A)
       Virtual   (A) (A) (A) (A) (A) (A) (A) (A) (A) (A) (A) (A)
                 (A) (A) (A) (A) (A) (A) (A) (A) (A) (A) (A) (A)
                 (A) (A) (A) (A) (A) (A) (A) (A) (A) (A) (A) (A)
                 (A) (A) (A) (A) (A) (A) (A) (A) (A) (A) (A) (A)
                 (A) (A) (A) (A) (A) (A) (A) (A) (A) (A) (A) (A)
                 (A) (A) (A) (A) (A) (A) (A) (A) (A) (A) (A) (A)
                 (A) (A) (A) (A) (A) (A) (A) (A) (A) (A) (A) (A)
                 (A) (A) (A) (A) (A) (A) (A) (A) (A) (A) (A) (A)
                 (A) (A) (A) (A) (A) (A) (A) (A) (A) (A) (A) (A)
                 (A) (A) (A) (A) (A) (A) (A) (A) (A) (A) (A) (A)
                 (A) (A) (A) (A) (A) (A) (A) (A) (A) (A) (A) (A)
                 (A) (A) (A) (A) (A) (A) (A) (A) (A) (A) (A) (A)
                 (A) (A) (A) (A) (A) (A) (A) (A) (A) (A) (A) (A)
                 (A) (A) (A) (A) (A) (A) (A) (A) (A) (A) (A) (A)
                 (A) (A) (A) (A) (A) (A) (A) (A) (A) (A) (A) (A)
                 (A) (A) (A) (A) (A) (A) (A) (A) (A) (A) (A) (A)
                 (A) (A) (A) (A) (A) (A) (A) (A) (A) (A) (A) (A)
                 (A) (A) (A) (A) (A) (A) (A) (A) (A) (A) (A) (A)
                 (A) (A) (A) (A) (A) (A) (A) (A) (A) (A) (A) (A)
                 (A) (A) (A) (A) (A) (A) (A) (A) (A) (A) (A) (A)
                 (A) (A) (A) (A) (A) (A) (A) (A) (A) (A) (A) (A)
                 (A) (A) (A) (A) (A) (A) (A) (A) (A) (A) (A) (A)
                 (A) (A) (A) (A) (A) (A) (A) (A) (A) (A) (A) (A)
                 (A) (A) (A) (A) (A) (A) (A) (A)
 Beta  Orbitals:
       Occupied  (A) (A) (A) (A) (A) (A) (A) (A) (A) (A) (A) (A)
                 (A) (A) (A) (A) (A) (A) (A) (A) (A) (A) (A) (A)
                 (A) (A) (A) (A) (A) (A) (A) (A) (A) (A) (A) (A)
                 (A) (A) (A) (A) (A) (A) (A) (A) (A) (A) (A) (A)
                 (A) (A) (A) (A) (A) (A) (A) (A) (A) (A) (A) (A)
                 (A) (A) (A) (A) (A) (A) (A) (A) (A) (A) (A)
       Virtual   (A) (A) (A) (A) (A) (A) (A) (A) (A) (A) (A) (A)
                 (A) (A) (A) (A) (A) (A) (A) (A) (A) (A) (A) (A)
                 (A) (A) (A) (A) (A) (A) (A) (A) (A) (A) (A) (A)
                 (A) (A) (A) (A) (A) (A) (A) (A) (A) (A) (A) (A)
                 (A) (A) (A) (A) (A) (A) (A) (A) (A) (A) (A) (A)
                 (A) (A) (A) (A) (A) (A) (A) (A) (A) (A) (A) (A)
                 (A) (A) (A) (A) (A) (A) (A) (A) (A) (A) (A) (A)
                 (A) (A) (A) (A) (A) (A) (A) (A) (A) (A) (A) (A)
                 (A) (A) (A) (A) (A) (A) (A) (A) (A) (A) (A) (A)
                 (A) (A) (A) (A) (A) (A) (A) (A) (A) (A) (A) (A)
                 (A) (A) (A) (A) (A) (A) (A) (A) (A) (A) (A) (A)
                 (A) (A) (A) (A) (A) (A) (A) (A) (A) (A) (A) (A)
                 (A) (A) (A) (A) (A) (A) (A) (A) (A) (A) (A) (A)
                 (A) (A) (A) (A) (A) (A) (A) (A) (A) (A) (A) (A)
                 (A) (A) (A) (A) (A) (A) (A) (A) (A) (A) (A) (A)
                 (A) (A) (A) (A) (A) (A) (A) (A) (A) (A) (A) (A)
                 (A) (A) (A) (A) (A) (A) (A) (A) (A) (A) (A) (A)
                 (A) (A) (A) (A) (A) (A) (A) (A) (A) (A) (A) (A)
                 (A) (A) (A) (A) (A) (A) (A) (A) (A) (A) (A) (A)
                 (A) (A) (A) (A) (A) (A) (A) (A) (A) (A) (A) (A)
                 (A) (A) (A) (A) (A) (A) (A) (A) (A) (A) (A) (A)
                 (A) (A) (A) (A) (A) (A) (A) (A) (A) (A) (A) (A)
                 (A) (A) (A) (A) (A) (A) (A) (A) (A) (A) (A) (A)
                 (A) (A) (A) (A) (A) (A) (A) (A) (A)
 Generating guess from densities on rwf.
 Convergence on wavefunction:    0.000001000000000
 Davidson Disk Diagonalization:  ConvIn= 1.00D-06 SkipCon=T Conv= 1.00D-06.
 Max sub-space:   200 roots to seek:     3 dimension of matrix:        23613
 Iteration     1 Dimension     6 NMult     0 NNew      6
 CISAX will form     6 AO SS matrices at one time.
 NMat=     6 NSing=     6 JSym2X= 0.
 FoFJK:  IHMeth= 1 ICntrl=       0 DoSepK=F KAlg= 0 I1Cent=   0 FoldK=F
 IRaf=         0 NMat=  12 IRICut=       1 DoRegI=T DoRafI=F ISym2E= 0.
 FoFCou: FMM=F IPFlag=           0 FMFlag=      100000 FMFlg1=           0
         NFxFlg=           0 DoJE=F BraDBF=F KetDBF=F FulRan=T
         wScrn=  0.000000 ICntrl=       0 IOpCl=  1 I1Cent=           0 NGrid=           0
         NMat0=   12 NMatS0=      6 NMatT0=    0 NMatD0=   12 NMtDS0=    0 NMtDT0=    0
 Symmetry not used in FoFCou.
 Excitation Energies [eV] at current iteration:
 Root      1 :     1.787500691547566
 Root      2 :     2.407376524616730
 Root      3 :     2.833033490973222
 Iteration     2 Dimension    12 NMult     6 NNew      6
 CISAX will form     6 AO SS matrices at one time.
 NMat=     6 NSing=     6 JSym2X= 0.
 Root      1 not converged, maximum delta is    0.000688143587083
 Root      2 not converged, maximum delta is    0.001320466414798
 Root      3 not converged, maximum delta is    0.001563523573047
 Excitation Energies [eV] at current iteration:
 Root      1 :     1.787489022556169   Change is   -0.000011668991397
 Root      2 :     2.407356905547960   Change is   -0.000019619068770
 Root      3 :     2.833016102241502   Change is   -0.000017388731720
 Iteration     3 Dimension    18 NMult    12 NNew      6
 CISAX will form     6 AO SS matrices at one time.
 NMat=     6 NSing=     6 JSym2X= 0.
 Root      1 not converged, maximum delta is    0.000217271254145
 Root      2 not converged, maximum delta is    0.000279252572148
 Root      3 not converged, maximum delta is    0.001345996254442
 Excitation Energies [eV] at current iteration:
 Root      1 :     1.787487898828102   Change is   -0.000001123728067
 Root      2 :     2.407356442828383   Change is   -0.000000462719577
 Root      3 :     2.833010677708510   Change is   -0.000005424532992
 Iteration     4 Dimension    24 NMult    18 NNew      6
 CISAX will form     6 AO SS matrices at one time.
 NMat=     6 NSing=     6 JSym2X= 0.
 Root      1 not converged, maximum delta is    0.000072640486848
 Root      2 not converged, maximum delta is    0.000021640951934
 Root      3 not converged, maximum delta is    0.000547416322211
 Excitation Energies [eV] at current iteration:
 Root      1 :     1.787487752250771   Change is   -0.000000146577332
 Root      2 :     2.407356429860335   Change is   -0.000000012968047
 Root      3 :     2.833008657724918   Change is   -0.000002019983592
 Iteration     5 Dimension    30 NMult    24 NNew      6
 CISAX will form     6 AO SS matrices at one time.
 NMat=     6 NSing=     6 JSym2X= 0.
 Root      1 not converged, maximum delta is    0.000022740882638
 Root      2 not converged, maximum delta is    0.000012651346661
 Root      3 not converged, maximum delta is    0.000472387399218
 Excitation Energies [eV] at current iteration:
 Root      1 :     1.787487726918727   Change is   -0.000000025332044
 Root      2 :     2.407356428853127   Change is   -0.000000001007209
 Root      3 :     2.833007345593481   Change is   -0.000001312131437
 Iteration     6 Dimension    36 NMult    30 NNew      6
 CISAX will form     6 AO SS matrices at one time.
 NMat=     6 NSing=     6 JSym2X= 0.
 Root      1 not converged, maximum delta is    0.000012470699882
 Root      2 not converged, maximum delta is    0.000001910669110
 Root      3 not converged, maximum delta is    0.000875541907301
 Excitation Energies [eV] at current iteration:
 Root      1 :     1.787487719596804   Change is   -0.000000007321922
 Root      2 :     2.407356428684843   Change is   -0.000000000168284
 Root      3 :     2.833005911374838   Change is   -0.000001434218643
 Iteration     7 Dimension    42 NMult    36 NNew      6
 CISAX will form     6 AO SS matrices at one time.
 NMat=     6 NSing=     6 JSym2X= 0.
 Root      1 not converged, maximum delta is    0.000001837685959
 Root      2 has converged.
 Root      3 not converged, maximum delta is    0.000405436145895
 Excitation Energies [eV] at current iteration:
 Root      1 :     1.787487718575815   Change is   -0.000000001020990
 Root      2 :     2.407356428665857   Change is   -0.000000000018986
 Root      3 :     2.833005438729270   Change is   -0.000000472645568
 Iteration     8 Dimension    46 NMult    42 NNew      4
 CISAX will form     4 AO SS matrices at one time.
 NMat=     4 NSing=     4 JSym2X= 0.
 Root      1 has converged.
 Root      2 has converged.
 Root      3 not converged, maximum delta is    0.000250882182949
 Excitation Energies [eV] at current iteration:
 Root      1 :     1.787487718426346   Change is   -0.000000000149469
 Root      2 :     2.407356428665925   Change is    0.000000000000068
 Root      3 :     2.833005262222044   Change is   -0.000000176507226
 Iteration     9 Dimension    48 NMult    46 NNew      2
 CISAX will form     2 AO SS matrices at one time.
 NMat=     2 NSing=     2 JSym2X= 0.
 Root      1 has converged.
 Root      2 has converged.
 Root      3 not converged, maximum delta is    0.000082370696123
 Excitation Energies [eV] at current iteration:
 Root      1 :     1.787487718424414   Change is   -0.000000000001932
 Root      2 :     2.407356428665822   Change is   -0.000000000000102
 Root      3 :     2.833005227724291   Change is   -0.000000034497753
 Iteration    10 Dimension    50 NMult    48 NNew      2
 CISAX will form     2 AO SS matrices at one time.
 NMat=     2 NSing=     2 JSym2X= 0.
 Root      1 has converged.
 Root      2 has converged.
 Root      3 not converged, maximum delta is    0.000043867060313
 Excitation Energies [eV] at current iteration:
 Root      1 :     1.787487718423862   Change is   -0.000000000000552
 Root      2 :     2.407356428665446   Change is   -0.000000000000376
 Root      3 :     2.833005219499435   Change is   -0.000000008224856
 Iteration    11 Dimension    52 NMult    50 NNew      2
 CISAX will form     2 AO SS matrices at one time.
 NMat=     2 NSing=     2 JSym2X= 0.
 Root      1 has converged.
 Root      2 has converged.
 Root      3 not converged, maximum delta is    0.000016040766984
 Excitation Energies [eV] at current iteration:
 Root      1 :     1.787487718424644   Change is    0.000000000000782
 Root      2 :     2.407356428665857   Change is    0.000000000000410
 Root      3 :     2.833005218000290   Change is   -0.000000001499145
 Iteration    12 Dimension    54 NMult    52 NNew      2
 CISAX will form     2 AO SS matrices at one time.
 NMat=     2 NSing=     2 JSym2X= 0.
 Root      1 has converged.
 Root      2 has converged.
 Root      3 not converged, maximum delta is    0.000004244091699
 Excitation Energies [eV] at current iteration:
 Root      1 :     1.787487718423770   Change is   -0.000000000000874
 Root      2 :     2.407356428665413   Change is   -0.000000000000444
 Root      3 :     2.833005217764346   Change is   -0.000000000235943
 Iteration    13 Dimension    56 NMult    54 NNew      2
 CISAX will form     2 AO SS matrices at one time.
 NMat=     2 NSing=     2 JSym2X= 0.
 Root      1 has converged.
 Root      2 has converged.
 Root      3 not converged, maximum delta is    0.000001204053139
 Excitation Energies [eV] at current iteration:
 Root      1 :     1.787487718426023   Change is    0.000000000002253
 Root      2 :     2.407356428664730   Change is   -0.000000000000683
 Root      3 :     2.833005217732717   Change is   -0.000000000031629
 Iteration    14 Dimension    58 NMult    56 NNew      2
 CISAX will form     2 AO SS matrices at one time.
 NMat=     2 NSing=     2 JSym2X= 0.
 Root      1 has converged.
 Root      2 has converged.
 Root      3 has converged.
 Excitation Energies [eV] at current iteration:
 Root      1 :     1.787487718423356   Change is   -0.000000000002667
 Root      2 :     2.407356428665993   Change is    0.000000000001264
 Root      3 :     2.833005217729670   Change is   -0.000000000003047
 Convergence achieved on expansion vectors.
 ***********************************************************************
 Excited states from <AA,BB:AA,BB> singles matrix:
 ***********************************************************************
 
 ExtSpn:  IState=     1 X2= 1.009 Y2= 0.009 X2-Y2-1=-2.89D-15
          S2Grnd=  0.773 Ra=  0.004 Rb=  0.007 T= -0.001 S2Ext=  0.009 S2=  0.782
 ExtSpn:  IState=     2 X2= 1.002 Y2= 0.002 X2-Y2-1= 0.00D+00
          S2Grnd=  0.773 Ra=  0.016 Rb=  0.193 T=  0.114 S2Ext=  0.324 S2=  1.097
 ExtSpn:  IState=     3 X2= 1.013 Y2= 0.013 X2-Y2-1= 1.33D-15
          S2Grnd=  0.773 Ra=  0.058 Rb=  0.071 T=  0.121 S2Ext=  0.251 S2=  1.024
 1PDM for each excited state written to RWF  633
 Ground to excited state transition densities written to RWF  633
 Ground to excited state transition electric dipole moments (Au):
       state          X           Y           Z        Dip. S.      Osc.
         1         0.0643     -0.8170      0.0000      0.6716      0.0294
         2         0.0000      0.0000     -0.0007      0.0000      0.0000
         3        -0.9250      0.2606      0.0000      0.9236      0.0641
 Ground to excited state transition velocity dipole moments (Au):
       state          X           Y           Z        Dip. S.      Osc.
         1        -0.0073      0.0653      0.0000      0.0043      0.0439
         2         0.0000      0.0000      0.0001      0.0000      0.0000
         3         0.0978     -0.0272      0.0000      0.0103      0.0659
 Ground to excited state transition magnetic dipole moments (Au):
       state          X           Y           Z
         1         0.0000      0.0000     -0.1681
         2         0.0816     -0.3726      0.0000
         3         0.0000      0.0000     -0.3474
 Ground to excited state transition velocity quadrupole moments (Au):
       state          XX          YY          ZZ          XY          XZ          YZ
         1        -0.0003      0.0498      0.0005     -0.1902      0.0000      0.0000
         2         0.0000      0.0000      0.0000      0.0000      0.0082      0.0015
         3        -0.0543     -0.1282      0.0083      0.0003      0.0000      0.0000
 <0|del|b> * <b|rxdel|0> + <0|del|b> * <b|delr+rdel|0>
 Rotatory Strengths (R) in cgs (10**-40 erg-esu-cm/Gauss)
       state          XX          YY          ZZ    R(velocity)    E-M Angle
         1         0.0019     -0.0004      0.0008      0.0007       90.00
         2        -0.0002      0.0004      0.0003      0.0002       90.00
         3        -0.0008     -0.0010     -0.0010     -0.0009       90.00
 1/2[<0|r|b>*<b|rxdel|0> + (<0|rxdel|b>*<b|r|0>)*]
 Rotatory Strengths (R) in cgs (10**-40 erg-esu-cm/Gauss)
       state          XX          YY          ZZ     R(length)
         1        -0.0003      0.0020      0.0002      0.0006
         2         0.0009     -0.0002      0.0000      0.0002
         3        -0.0015     -0.0014      0.0001     -0.0009
  1/2[<0|del|b>*<b|r|0> + (<0|r|b>*<b|del|0>)*] (Au)
       state          X           Y           Z        Dip. S.   Osc.(frdel)
         1        -0.0005     -0.0534      0.0000      0.0539      0.0359
         2         0.0000      0.0000      0.0000      0.0000      0.0000
         3        -0.0904     -0.0071      0.0000      0.0975      0.0650

 Excitation energies and oscillator strengths:
 
 Excited State   1:  2.032-A      1.7875 eV  693.62 nm  f=0.0294  <S**2>=0.782
     72A -> 73A        0.97773
     69B -> 72B        0.10733
     71B -> 72B        0.13756
 This state for optimization and/or second-order correction.
 Total Energy, E(TD-HF/TD-KS) =  -3263.05278260    
 Copying the excited state density for this state as the 1-particle RhoCI density.
 
 Excited State   2:  2.321-A      2.4074 eV  515.02 nm  f=0.0000  <S**2>=1.097
     70A -> 73A       -0.12393
     70B -> 72B        0.94006
     70B -> 73B        0.28585
     70B -> 79B       -0.11680
 
 Excited State   3:  2.257-A      2.8330 eV  437.64 nm  f=0.0641  <S**2>=1.024
     71A -> 73A       -0.15620
     72A -> 74A        0.52151
     68B -> 72B       -0.24291
     68B -> 73B        0.12865
     69B -> 72B       -0.20609
     71B -> 72B        0.71145
 SavETr:  write IOETrn=   770 NScale= 10 NData=  16 NLR=1 NState=    3 LETran=      62.
 The state does not have a specific multiplicity.
 CISAX will form     1 AO SS matrices at one time.
 NMat=     1 NSing=     1 JSym2X= 0.
 GePol: Maximum number of non-zero 1st derivatives   =     349
 CISAX will form     1 AO SS matrices at one time.
 NMat=     1 NSing=     1 JSym2X= 0.
 Leave Link  914 at Fri Jan 10 19:28:57 2020, MaxMem=   134217728 cpu:      4147.0
 (Enter E:\Gaussian\G09W\l1002.exe)
 Minotr:  UHF open shell wavefunction.
          Computing CIS/TD-HF/TD-KS derivatives.
          Using Z-Vector for PSCF gradient.
          Skipping F1 and S1 gradient terms here.
          IDoAtm=1111111111111111111111111
 NEqPCM:  Using equilibrium solvation (IEInf=0, Eps=  35.6880, EpsInf=   1.8069)
          Frozen-core window.
          Direct CPHF calculation.
          Differentiating once with respect to electric field.
                with respect to dipole field.
          Differentiating once with respect to nuclear coordinates.
          Requested convergence is 1.0D-10 RMS, and 1.0D-09 maximum.
          NewPWx=F KeepS1=T KeepF1=T KeepIn=T MapXYZ=F SortEE=F KeepMc=T.
          MDV=     134217222 using IRadAn=       0.
 Using stored XC quadrature information.
          Solving linear equations separately, MaxMat=       0.
          There are     1 degrees of freedom in the 1st order CPHF.  IDoFFX=0 NUNeed=     1.
 FoFJK:  IHMeth= 1 ICntrl=       0 DoSepK=F KAlg= 0 I1Cent=   0 FoldK=F
 IRaf= 800000000 NMat=   1 IRICut=       1 DoRegI=T DoRafI=F ISym2E=-1.
 FoFCou: FMM=F IPFlag=           0 FMFlag=      100000 FMFlg1=           0
         NFxFlg=           0 DoJE=F BraDBF=F KetDBF=F FulRan=T
         wScrn=  0.000000 ICntrl=       0 IOpCl=  1 I1Cent=           0 NGrid=           0
         NMat0=    1 NMatS0=      1 NMatT0=    0 NMatD0=    1 NMtDS0=    0 NMtDT0=    0
 Petite list used in FoFCou.
 LinEq1:  Iter=  0 NonCon=     1 RMS=2.67D-03 Max=2.34D-01 NDo=     1
 AX will form     1 AO Fock derivatives at one time.
 LinEq1:  Iter=  1 NonCon=     1 RMS=1.91D-03 Max=1.60D-01 NDo=     1
 LinEq1:  Iter=  2 NonCon=     1 RMS=9.71D-04 Max=5.00D-02 NDo=     1
 LinEq1:  Iter=  3 NonCon=     1 RMS=7.48D-04 Max=3.96D-02 NDo=     1
 LinEq1:  Iter=  4 NonCon=     1 RMS=5.93D-04 Max=3.00D-02 NDo=     1
 LinEq1:  Iter=  5 NonCon=     1 RMS=3.87D-04 Max=2.15D-02 NDo=     1
 LinEq1:  Iter=  6 NonCon=     1 RMS=3.24D-04 Max=1.51D-02 NDo=     1
 LinEq1:  Iter=  7 NonCon=     1 RMS=2.00D-04 Max=1.20D-02 NDo=     1
 LinEq1:  Iter=  8 NonCon=     1 RMS=1.59D-04 Max=1.28D-02 NDo=     1
 LinEq1:  Iter=  9 NonCon=     1 RMS=8.07D-05 Max=3.78D-03 NDo=     1
 LinEq1:  Iter= 10 NonCon=     1 RMS=5.25D-05 Max=2.76D-03 NDo=     1
 LinEq1:  Iter= 11 NonCon=     1 RMS=3.11D-05 Max=1.10D-03 NDo=     1
 LinEq1:  Iter= 12 NonCon=     1 RMS=1.72D-05 Max=8.45D-04 NDo=     1
 LinEq1:  Iter= 13 NonCon=     1 RMS=1.15D-05 Max=5.21D-04 NDo=     1
 LinEq1:  Iter= 14 NonCon=     1 RMS=7.60D-06 Max=3.94D-04 NDo=     1
 LinEq1:  Iter= 15 NonCon=     1 RMS=4.59D-06 Max=2.50D-04 NDo=     1
 LinEq1:  Iter= 16 NonCon=     1 RMS=2.67D-06 Max=1.25D-04 NDo=     1
 LinEq1:  Iter= 17 NonCon=     1 RMS=2.01D-06 Max=8.46D-05 NDo=     1
 LinEq1:  Iter= 18 NonCon=     1 RMS=8.38D-07 Max=3.43D-05 NDo=     1
 LinEq1:  Iter= 19 NonCon=     1 RMS=5.20D-07 Max=1.92D-05 NDo=     1
 LinEq1:  Iter= 20 NonCon=     1 RMS=2.80D-07 Max=1.05D-05 NDo=     1
 LinEq1:  Iter= 21 NonCon=     1 RMS=1.76D-07 Max=6.78D-06 NDo=     1
 LinEq1:  Iter= 22 NonCon=     1 RMS=1.06D-07 Max=4.61D-06 NDo=     1
 LinEq1:  Iter= 23 NonCon=     1 RMS=4.66D-08 Max=2.15D-06 NDo=     1
 LinEq1:  Iter= 24 NonCon=     1 RMS=3.44D-08 Max=1.18D-06 NDo=     1
 LinEq1:  Iter= 25 NonCon=     1 RMS=1.45D-08 Max=8.25D-07 NDo=     1
 LinEq1:  Iter= 26 NonCon=     1 RMS=9.34D-09 Max=3.19D-07 NDo=     1
 LinEq1:  Iter= 27 NonCon=     1 RMS=5.60D-09 Max=1.84D-07 NDo=     1
 LinEq1:  Iter= 28 NonCon=     1 RMS=2.88D-09 Max=9.99D-08 NDo=     1
 LinEq1:  Iter= 29 NonCon=     1 RMS=1.88D-09 Max=5.05D-08 NDo=     1
 LinEq1:  Iter= 30 NonCon=     1 RMS=6.87D-10 Max=1.84D-08 NDo=     1
 LinEq1:  Iter= 31 NonCon=     1 RMS=2.65D-10 Max=1.14D-08 NDo=     1
 LinEq1:  Iter= 32 NonCon=     1 RMS=1.83D-10 Max=8.78D-09 NDo=     1
 LinEq1:  Iter= 33 NonCon=     1 RMS=6.12D-11 Max=1.46D-09 NDo=     1
 LinEq1:  Iter= 34 NonCon=     0 RMS=2.11D-11 Max=4.93D-10 NDo=     1
 Linear equations converged to 1.000D-10 1.000D-09 after    34 iterations.
 End of Minotr F.D. properties file   721 does not exist.
 End of Minotr F.D. properties file   722 does not exist.
 End of Minotr F.D. properties file   788 does not exist.
 Leave Link 1002 at Fri Jan 10 20:24:54 2020, MaxMem=   134217728 cpu:      3357.0
 (Enter E:\Gaussian\G09W\l701.exe)
 Compute integral first derivatives.
 ... and contract with generalized density number  6.
 R6Disp: Adding Grimme-D3(BJ) dispersion energy 1st derivatives to the gradient.
 D1PCM: PCM CHGder 1st derivatives, ID1Alg=3 FixD1E=F DoIter=F DoCFld=F I1PDM=6.
 Leave Link  701 at Fri Jan 10 20:25:52 2020, MaxMem=   134217728 cpu:        58.0
 (Enter E:\Gaussian\G09W\l702.exe)
 L702 exits ... SP integral derivatives will be done elsewhere.
 Leave Link  702 at Fri Jan 10 20:25:52 2020, MaxMem=   134217728 cpu:         0.0
 (Enter E:\Gaussian\G09W\l703.exe)
 Compute integral first derivatives, UseDBF=F ICtDFT=           0.
 Integral derivatives from FoFJK, PRISM(SPDF).
 Calling FoFJK, ICntrl=  10005127 FMM=F ISym2X=0 I1Cent= 0 IOpClX= 1 NMat=1 NMatS=1 NMatT=0.
 FoFJK:  IHMeth= 1 ICntrl=10005127 DoSepK=F KAlg= 0 I1Cent=   0 FoldK=F
 IRaf=         0 NMat=   1 IRICut=       1 DoRegI=T DoRafI=F ISym2E= 0.
 FoFCou: FMM=F IPFlag=           0 FMFlag=      100000 FMFlg1=         800
         NFxFlg=           0 DoJE=F BraDBF=F KetDBF=F FulRan=T
         wScrn=  0.000000 ICntrl=10005127 IOpCl=  1 I1Cent=           0 NGrid=           0
         NMat0=    1 NMatS0=      1 NMatT0=    0 NMatD0=    1 NMtDS0=    0 NMtDT0=    0
 Symmetry not used in FoFCou.
 Leave Link  703 at Fri Jan 10 20:30:31 2020, MaxMem=   134217728 cpu:       278.0
 (Enter E:\Gaussian\G09W\l716.exe)
 Dipole        =-1.36639603D+00-3.22231297D+00 3.12137125D-05
 ***** Axes restored to original set *****
 -------------------------------------------------------------------
 Center     Atomic                   Forces (Hartrees/Bohr)
 Number     Number              X              Y              Z
 -------------------------------------------------------------------
      1        6          -0.000144384    0.000073309    0.000000047
      2        6           0.000280038   -0.000289434   -0.000000030
      3        6          -0.000155590    0.000195266    0.000000799
      4        6           0.000242335    0.000214922    0.000000427
      5        6          -0.000123637    0.000072325   -0.000000151
      6        6           0.000091796   -0.000030250    0.000000038
      7        1           0.000064215    0.000041735   -0.000000024
      8        1          -0.000098633    0.000020391   -0.000000034
      9        1          -0.000112849   -0.000025738    0.000000095
     10        1           0.000040284   -0.000084289   -0.000000021
     11        6           0.000060405   -0.000038041   -0.000000904
     12        6           0.000024082    0.000234781   -0.000002954
     13        6          -0.000047491   -0.000184897    0.000000441
     14        6          -0.000066994    0.000304312    0.000000922
     15        6          -0.000384934    0.000006845   -0.000000038
     16        6          -0.000210809   -0.000373132   -0.000000036
     17        6           0.000180648    0.000164674    0.000000003
     18        1           0.000127232   -0.000010286   -0.000000112
     19        6           0.000141291   -0.000001159    0.000000020
     20        1           0.000106866    0.000050061   -0.000000086
     21        1          -0.000083745    0.000069759    0.000000006
     22       35          -0.000113752   -0.000037112    0.000000011
     23        8          -0.000004335   -0.000230752    0.000001252
     24        8           0.000164995   -0.000128590    0.000000445
     25        1           0.000022967   -0.000014699   -0.000000116
 -------------------------------------------------------------------
 Cartesian Forces:  Max     0.000384934 RMS     0.000125634
 Leave Link  716 at Fri Jan 10 20:30:31 2020, MaxMem=   134217728 cpu:         0.0
 (Enter E:\Gaussian\G09W\l103.exe)

 GradGradGradGradGradGradGradGradGradGradGradGradGradGradGradGradGradGrad
 Berny optimization.
 Using GEDIIS/GDIIS optimizer.
 FormGI is forming the generalized inverse of G from B-inverse, IUseBI=4.
 Internal  Forces:  Max     0.000282252 RMS     0.000079177
 Search for a local minimum.
 Step number   4 out of a maximum of  146
 All quantities printed in internal units (Hartrees-Bohrs-Radians)
 RMS Force = .79177D-04 SwitMx=.10000D-02 MixMth= 2
 Mixed Optimization -- En-DIIS/RFO-DIIS
 Swapping is turned off.
 Update second derivatives using D2CorX and points    1    2    3    4
 DE= -2.09D-05 DEPred=-1.78D-05 R= 1.17D+00
 TightC=F SS=  1.41D+00  RLast= 1.30D-02 DXNew= 6.8268D-01 3.8999D-02
 Trust test= 1.17D+00 RLast= 1.30D-02 DXMaxT set to 4.06D-01
 ITU=  1  1  1  0
     Eigenvalues ---    0.01151   0.01345   0.01638   0.01707   0.01732
     Eigenvalues ---    0.01777   0.01839   0.01859   0.01881   0.02057
     Eigenvalues ---    0.02085   0.02104   0.02116   0.02147   0.02168
     Eigenvalues ---    0.02184   0.02196   0.02206   0.02218   0.02247
     Eigenvalues ---    0.02270   0.02389   0.12194   0.15997   0.16000
     Eigenvalues ---    0.16000   0.16000   0.16000   0.16022   0.16253
     Eigenvalues ---    0.17586   0.21279   0.22161   0.22368   0.22770
     Eigenvalues ---    0.23545   0.24539   0.24798   0.24966   0.25000
     Eigenvalues ---    0.25000   0.25823   0.26329   0.32711   0.34692
     Eigenvalues ---    0.35407   0.35509   0.35557   0.35644   0.35694
     Eigenvalues ---    0.35762   0.35972   0.36997   0.37537   0.39616
     Eigenvalues ---    0.40675   0.41153   0.42128   0.42799   0.43528
     Eigenvalues ---    0.44475   0.45457   0.47485   0.48318   0.48573
     Eigenvalues ---    0.49891   0.54432   0.54897   0.87065
 En-DIIS/RFO-DIIS IScMMF=        0 using points:     4    3
 RFO step:  Lambda=-1.77638462D-06.
 NNeg= 0 NP= 2 Switch=  2.50D-03 Rises=F DC=  2.09D-05 SmlDif=  1.00D-05
 RMS Error=  0.1721134404D-03 NUsed= 2 EDIIS=F
 DidBck=F Rises=F RFO-DIIS coefs:    1.17992   -0.17992
 Iteration  1 RMS(Cart)=  0.00073453 RMS(Int)=  0.00000034
 Iteration  2 RMS(Cart)=  0.00000044 RMS(Int)=  0.00000004
 ITry= 1 IFail=0 DXMaxC= 3.65D-03 DCOld= 1.00D+10 DXMaxT= 4.06D-01 DXLimC= 3.00D+00 Rises=F
 Variable       Old X    -DE/DX   Delta X   Delta X   Delta X     New X
                                 (Linear)    (Quad)   (Total)
    R1        2.66030  -0.00006   0.00007  -0.00007   0.00000   2.66029
    R2        2.61322   0.00000  -0.00001  -0.00010  -0.00011   2.61311
    R3        2.04997  -0.00005   0.00007  -0.00018  -0.00012   2.04985
    R4        2.63356  -0.00017  -0.00006  -0.00041  -0.00047   2.63309
    R5        2.04401   0.00004  -0.00010   0.00019   0.00010   2.04411
    R6        2.69200   0.00007   0.00033   0.00000   0.00033   2.69233
    R7        2.77874  -0.00007  -0.00004  -0.00017  -0.00020   2.77854
    R8        2.64323   0.00015  -0.00029   0.00054   0.00025   2.64348
    R9        2.72244   0.00006   0.00021   0.00008   0.00029   2.72273
   R10        2.66042  -0.00012   0.00023  -0.00029  -0.00007   2.66035
   R11        2.05056   0.00000  -0.00007   0.00004  -0.00002   2.05054
   R12        2.04596   0.00002   0.00006   0.00004   0.00011   2.04607
   R13        2.72644  -0.00021   0.00048  -0.00081  -0.00032   2.72611
   R14        2.47966   0.00019  -0.00019   0.00035   0.00016   2.47982
   R15        2.76282  -0.00008  -0.00025  -0.00013  -0.00038   2.76244
   R16        2.37140  -0.00022   0.00004  -0.00025  -0.00021   2.37119
   R17        2.68377   0.00014   0.00046   0.00009   0.00055   2.68432
   R18        2.63791  -0.00016  -0.00017  -0.00039  -0.00056   2.63736
   R19        2.64260  -0.00017  -0.00011  -0.00036  -0.00047   2.64213
   R20        2.66574   0.00009   0.00048   0.00009   0.00057   2.66631
   R21        2.04109   0.00004  -0.00006   0.00016   0.00010   2.04119
   R22        2.65861  -0.00001   0.00014   0.00001   0.00016   2.65876
   R23        2.04337   0.00002  -0.00007   0.00011   0.00004   2.04341
   R24        2.60717  -0.00009  -0.00006  -0.00028  -0.00035   2.60682
   R25        3.61979  -0.00009   0.00019  -0.00070  -0.00051   3.61928
   R26        2.04740  -0.00002   0.00007  -0.00010  -0.00003   2.04738
   R27        1.82977   0.00000  -0.00010   0.00006  -0.00004   1.82974
    A1        2.11130  -0.00008  -0.00018  -0.00032  -0.00050   2.11081
    A2        2.08171  -0.00003  -0.00027  -0.00014  -0.00041   2.08130
    A3        2.09017   0.00011   0.00045   0.00046   0.00090   2.09107
    A4        2.10428   0.00016   0.00021   0.00064   0.00085   2.10513
    A5        2.11170  -0.00017  -0.00056  -0.00071  -0.00127   2.11043
    A6        2.06721   0.00001   0.00035   0.00007   0.00042   2.06763
    A7        2.07057  -0.00003  -0.00017  -0.00013  -0.00030   2.07026
    A8        2.09944   0.00002   0.00027   0.00001   0.00027   2.09972
    A9        2.11318   0.00002  -0.00009   0.00012   0.00003   2.11321
   A10        2.09662  -0.00013   0.00008  -0.00054  -0.00046   2.09616
   A11        2.05433   0.00011   0.00030   0.00029   0.00059   2.05492
   A12        2.13223   0.00001  -0.00038   0.00025  -0.00013   2.13210
   A13        2.10291   0.00009  -0.00003   0.00055   0.00052   2.10342
   A14        2.12787   0.00008   0.00029   0.00046   0.00075   2.12862
   A15        2.05241  -0.00017  -0.00026  -0.00101  -0.00127   2.05114
   A16        2.08070  -0.00001   0.00009  -0.00020  -0.00011   2.08059
   A17        2.11104   0.00009   0.00031   0.00050   0.00080   2.11185
   A18        2.09144  -0.00008  -0.00040  -0.00030  -0.00070   2.09075
   A19        2.15295  -0.00020  -0.00047  -0.00054  -0.00100   2.15195
   A20        2.12510   0.00028   0.00005   0.00121   0.00127   2.12637
   A21        2.00513  -0.00009   0.00041  -0.00068  -0.00026   2.00487
   A22        2.07240  -0.00009   0.00011  -0.00042  -0.00031   2.07209
   A23        2.10249  -0.00001  -0.00002  -0.00007  -0.00009   2.10240
   A24        2.10829   0.00010  -0.00009   0.00049   0.00040   2.10869
   A25        2.06542   0.00013   0.00012   0.00043   0.00056   2.06598
   A26        2.10257  -0.00011  -0.00009  -0.00043  -0.00052   2.10204
   A27        2.11520  -0.00002  -0.00003   0.00000  -0.00004   2.11517
   A28        2.10809   0.00003   0.00002   0.00011   0.00013   2.10822
   A29        2.10927   0.00007   0.00015   0.00035   0.00050   2.10977
   A30        2.06583  -0.00010  -0.00018  -0.00046  -0.00063   2.06520
   A31        2.07318   0.00006   0.00014   0.00028   0.00042   2.07360
   A32        2.10143   0.00009   0.00048   0.00044   0.00091   2.10234
   A33        2.10858  -0.00015  -0.00062  -0.00072  -0.00133   2.10725
   A34        2.10751   0.00016   0.00025   0.00066   0.00092   2.10842
   A35        2.07446   0.00004   0.00037   0.00027   0.00064   2.07511
   A36        2.10122  -0.00020  -0.00063  -0.00094  -0.00156   2.09966
   A37        2.11105  -0.00003  -0.00015  -0.00011  -0.00025   2.11080
   A38        2.07351  -0.00013  -0.00036  -0.00041  -0.00078   2.07273
   A39        2.09863   0.00016   0.00051   0.00052   0.00103   2.09966
   A40        2.09361  -0.00008  -0.00004  -0.00037  -0.00041   2.09320
   A41        2.09007  -0.00006  -0.00042  -0.00029  -0.00071   2.08935
   A42        2.09951   0.00014   0.00046   0.00067   0.00112   2.10064
   A43        1.97738   0.00004  -0.00043   0.00050   0.00007   1.97744
    D1        0.00000   0.00000   0.00000   0.00000   0.00000   0.00000
    D2        3.14159   0.00000   0.00000   0.00000   0.00000   3.14159
    D3        3.14159   0.00000   0.00000   0.00000   0.00000  -3.14159
    D4        0.00000   0.00000   0.00000   0.00000   0.00000   0.00000
    D5        0.00000   0.00000   0.00000   0.00000   0.00000   0.00000
    D6       -3.14159   0.00000   0.00000   0.00000   0.00000  -3.14159
    D7       -3.14159   0.00000   0.00000   0.00000   0.00000  -3.14159
    D8        0.00000   0.00000   0.00000   0.00000   0.00000   0.00000
    D9        0.00000   0.00000   0.00000   0.00000   0.00000   0.00000
   D10        3.14159   0.00000   0.00000   0.00000   0.00000   3.14158
   D11        3.14159   0.00000   0.00000   0.00000   0.00000   3.14159
   D12        0.00000   0.00000   0.00000   0.00000   0.00000  -0.00001
   D13        0.00001   0.00000   0.00000   0.00000   0.00000   0.00001
   D14       -3.14158   0.00000   0.00000   0.00001   0.00000  -3.14158
   D15       -3.14158   0.00000   0.00000   0.00001   0.00000  -3.14158
   D16        0.00001   0.00000   0.00000   0.00001   0.00001   0.00002
   D17       -3.14158   0.00000   0.00000  -0.00003  -0.00003   3.14158
   D18       -0.00002   0.00000  -0.00001   0.00007   0.00006   0.00004
   D19        0.00001   0.00000   0.00000  -0.00003  -0.00003  -0.00002
   D20        3.14157   0.00000  -0.00001   0.00007   0.00006  -3.14155
   D21       -0.00001   0.00000   0.00000   0.00000   0.00000  -0.00001
   D22        3.14158   0.00000   0.00000   0.00000   0.00000   3.14158
   D23        3.14158   0.00000   0.00000  -0.00001   0.00000   3.14158
   D24       -0.00002   0.00000   0.00000   0.00000   0.00000  -0.00002
   D25       -0.00003   0.00000   0.00000   0.00002   0.00002  -0.00002
   D26        3.14157   0.00000   0.00000  -0.00001  -0.00001   3.14157
   D27        3.14156   0.00000   0.00000   0.00002   0.00002   3.14158
   D28       -0.00002   0.00000   0.00000  -0.00001   0.00000  -0.00002
   D29        0.00000   0.00000   0.00000   0.00000   0.00000   0.00000
   D30       -3.14159   0.00000   0.00000   0.00000   0.00000  -3.14159
   D31       -3.14158   0.00000   0.00000   0.00000   0.00000  -3.14159
   D32        0.00001   0.00000   0.00000   0.00000   0.00000   0.00001
   D33        0.00003   0.00000   0.00000  -0.00001  -0.00001   0.00001
   D34       -3.14157   0.00000   0.00000  -0.00002  -0.00001  -3.14159
   D35       -3.14158   0.00000   0.00000   0.00001   0.00001  -3.14157
   D36        0.00001   0.00000   0.00000   0.00001   0.00001   0.00002
   D37       -0.00002   0.00000   0.00000   0.00001   0.00002  -0.00001
   D38        3.14158   0.00000   0.00000  -0.00001   0.00000   3.14158
   D39       -0.00002   0.00000   0.00000   0.00004   0.00003   0.00001
   D40        3.14158   0.00000   0.00000   0.00003   0.00003  -3.14158
   D41       -3.14158   0.00000   0.00001  -0.00006  -0.00006   3.14155
   D42        0.00002   0.00000   0.00001  -0.00007  -0.00007  -0.00004
   D43        0.00000   0.00000   0.00000  -0.00001  -0.00001  -0.00001
   D44        3.14159   0.00000   0.00000  -0.00001  -0.00001   3.14158
   D45       -3.14159   0.00000   0.00000  -0.00001  -0.00001   3.14159
   D46        0.00000   0.00000   0.00000   0.00000   0.00000   0.00000
   D47       -3.14159   0.00000   0.00000   0.00001   0.00001  -3.14158
   D48        0.00000   0.00000   0.00000   0.00001   0.00001   0.00001
   D49        0.00000   0.00000   0.00000   0.00000   0.00000   0.00000
   D50        3.14159   0.00000   0.00000   0.00000   0.00000  -3.14159
   D51        3.14159   0.00000   0.00000   0.00001   0.00001  -3.14159
   D52        0.00000   0.00000   0.00000   0.00000   0.00000   0.00000
   D53        0.00000   0.00000   0.00000   0.00000   0.00000   0.00000
   D54       -3.14159   0.00000   0.00000   0.00000   0.00000  -3.14159
   D55        0.00000   0.00000   0.00000   0.00000   0.00000   0.00000
   D56       -3.14159   0.00000   0.00000   0.00000   0.00000   3.14159
   D57       -3.14159   0.00000   0.00000   0.00000   0.00000  -3.14159
   D58        0.00000   0.00000   0.00000   0.00000   0.00000   0.00000
   D59        0.00000   0.00000   0.00000   0.00000   0.00000   0.00000
   D60        3.14159   0.00000   0.00000   0.00000   0.00000   3.14159
   D61        3.14159   0.00000   0.00000   0.00001   0.00001  -3.14159
   D62        0.00000   0.00000   0.00000   0.00000   0.00000   0.00000
   D63        0.00000   0.00000   0.00000   0.00000   0.00000   0.00000
   D64        3.14159   0.00000   0.00000   0.00000   0.00000   3.14159
   D65       -3.14159   0.00000   0.00000   0.00000   0.00000   3.14159
   D66        0.00000   0.00000   0.00000   0.00000   0.00000   0.00000
         Item               Value     Threshold  Converged?
 Maximum Force            0.000282     0.000450     YES
 RMS     Force            0.000079     0.000300     YES
 Maximum Displacement     0.003653     0.001800     NO 
 RMS     Displacement     0.000735     0.001200     YES
 Predicted change in Energy=-2.014388D-06
 Lowest energy point so far.  Saving SCF results.
 GradGradGradGradGradGradGradGradGradGradGradGradGradGradGradGradGradGrad

 Leave Link  103 at Fri Jan 10 20:30:31 2020, MaxMem=   134217728 cpu:         0.0
 (Enter E:\Gaussian\G09W\l202.exe)
                          Input orientation:                          
 ---------------------------------------------------------------------
 Center     Atomic      Atomic             Coordinates (Angstroms)
 Number     Number       Type             X           Y           Z
 ---------------------------------------------------------------------
      1          6           0       -5.080213    0.056568   -0.000001
      2          6           0       -4.038363    1.003329   -0.000003
      3          6           0       -2.706753    0.593093   -0.000008
      4          6           0       -2.422845   -0.803051   -0.000007
      5          6           0       -3.468988   -1.731717   -0.000011
      6          6           0       -4.808737   -1.299320   -0.000007
      7          1           0       -6.108965    0.400539    0.000003
      8          1           0       -4.251123    2.063894   -0.000003
      9          1           0       -3.287382   -2.801509   -0.000020
     10          1           0       -5.609280   -2.028318   -0.000008
     11          6           0       -1.039557   -1.206084    0.000004
     12          6           0       -1.623960    1.587811   -0.000020
     13          6           0        0.058083   -0.269989   -0.000005
     14          6           0       -0.239355    1.119004   -0.000010
     15          6           0        1.376855   -0.726741   -0.000001
     16          6           0        0.825177    2.025433   -0.000007
     17          6           0        2.423939    0.218984    0.000001
     18          1           0        1.589469   -1.785763    0.000002
     19          6           0        2.157210    1.572423   -0.000001
     20          1           0        0.609246    3.084979   -0.000009
     21          1           0        2.968570    2.290411    0.000000
     22         35           0        4.233164   -0.409381    0.000007
     23          8           0       -1.887283    2.814648    0.000021
     24          8           0       -0.686927   -2.470083    0.000035
     25          1           0       -1.440600   -3.077941    0.000055
 ---------------------------------------------------------------------
                    Distance matrix (angstroms):
                    1          2          3          4          5
     1  C    0.000000
     2  C    1.407767   0.000000
     3  C    2.433346   1.393369   0.000000
     4  C    2.792947   2.423408   1.424719   0.000000
     5  C    2.407075   2.793683   2.446578   1.398869   0.000000
     6  C    1.382799   2.428101   2.828351   2.436958   1.407798
     7  H    1.084733   2.156560   3.407657   3.877643   3.393522
     8  H    2.171808   1.081696   2.132682   3.400291   3.875358
     9  H    3.373848   3.878242   3.443901   2.177443   1.085097
    10  H    2.150968   3.414479   3.911069   3.413891   2.160746
    11  C    4.233343   3.724828   2.452872   1.440806   2.485644
    12  C    3.780263   2.484141   1.470341   2.520801   3.797814
    13  C    5.148662   4.289779   2.896417   2.537550   3.817967
    14  C    4.956075   3.800768   2.522823   2.908939   4.307800
    15  C    6.504407   5.684869   4.291599   3.800466   4.948957
    16  C    6.224955   4.969780   3.811316   4.306968   5.705789
    17  C    7.505910   6.509727   5.144314   4.953370   6.207401
    18  H    6.919454   6.281045   4.910854   4.130906   5.058746
    19  C    7.394465   6.221655   4.961575   5.159437   6.524680
    20  H    6.445247   5.092497   4.147932   4.930553   6.311303
    21  H    8.353021   7.124162   5.923696   6.215856   7.590761
    22  Br   9.325026   8.391300   7.011948   6.667641   7.814840
    23  O    4.219219   2.812120   2.367876   3.657127   4.813649
    24  O    5.068030   4.826667   3.669161   2.406741   2.878376
    25  H    4.803325   4.837886   3.883251   2.477888   2.434477
                    6          7          8          9         10
     6  C    0.000000
     7  H    2.140120   0.000000
     8  H    3.409127   2.493658   0.000000
     9  H    2.138011   4.267838   4.959934   0.000000
    10  H    1.082731   2.479724   4.311705   2.447250   0.000000
    11  C    3.770334   5.317907   4.583330   2.756465   4.643107
    12  C    4.298643   4.639492   2.669951   4.693943   5.381372
    13  C    4.974481   6.203393   4.900639   4.195323   5.933863
    14  C    5.169869   5.913418   4.121541   4.965973   6.224286
    15  C    6.212037   7.570223   6.281862   5.104877   7.106349
    16  C    6.541787   7.121981   5.076446   6.341334   7.604942
    17  C    7.390322   8.534836   6.925326   6.460849   8.341642
    18  H    6.416671   8.002862   6.995168   4.981508   7.202834
    19  C    7.534676   8.348831   6.427152   6.983901   8.560591
    20  H    6.969693   7.234679   4.966467   7.059352   8.050831
    21  H    8.565785   9.272177   7.223245   8.066262   9.603694
    22  Br   9.085592  10.373795   8.837433   7.891825   9.974702
    23  O    5.045754   4.863181   2.480196   5.788048   6.107994
    24  O    4.284858   6.135060   5.767186   2.621490   4.942137
    25  H    3.808916   5.821809   5.859822   1.867356   4.298790
                   11         12         13         14         15
    11  C    0.000000
    12  C    2.854360   0.000000
    13  C    1.442597   2.506130   0.000000
    14  C    2.458934   1.461818   1.420482   0.000000
    15  C    2.463497   3.789729   1.395630   2.453347   0.000000
    16  C    3.730942   2.487928   2.420205   1.398157   2.806922
    17  C    3.745214   4.273075   2.415858   2.811258   1.410951
    18  H    2.692175   4.659091   2.154696   3.432531   1.080154
    19  C    4.235496   3.781202   2.792995   2.439081   2.427985
    20  H    4.596931   2.688628   3.399940   2.141304   3.888244
    21  H    5.318887   4.645964   3.876413   3.415110   3.411270
    22  Br   5.332572   6.188270   4.177408   4.726456   2.873886
    23  O    4.109127   1.254778   3.646839   2.364503   4.816226
    24  O    1.312266   4.164676   2.322811   3.616886   2.701562
    25  H    1.914337   4.669354   3.182868   4.365472   3.669632
                   16         17         18         19         20
    16  C    0.000000
    17  C    2.412321   0.000000
    18  H    3.887076   2.171487   0.000000
    19  C    1.406958   1.379471   3.405840   0.000000
    20  H    1.081326   3.392202   4.968397   2.164260   0.000000
    21  H    2.159709   2.141829   4.303152   1.083425   2.489528
    22  Br   4.188400   1.915239   2.980529   2.870041   5.034217
    23  O    2.824943   5.032306   5.766419   4.230963   2.511122
    24  O    4.743007   4.112003   2.377030   4.942770   5.704277
    25  H    5.583742   5.079802   3.294092   5.879637   6.494879
                   21         22         23         24         25
    21  H    0.000000
    22  Br   2.981288   0.000000
    23  O    4.884069   6.917676   0.000000
    24  O    6.002079   5.334209   5.419339   0.000000
    25  H    6.946941   6.269994   5.909495   0.968254   0.000000
 Stoichiometry    C14H8BrO2(2)
 Framework group  C1[X(C14H8BrO2)]
 Deg. of freedom    69
 Full point group                 C1      NOp   1
 RotChk:  IX=2 Diff= 4.11D-04
 Largest Abelian subgroup         C1      NOp   1
 Largest concise Abelian subgroup C1      NOp   1
                         Standard orientation:                         
 ---------------------------------------------------------------------
 Center     Atomic      Atomic             Coordinates (Angstroms)
 Number     Number       Type             X           Y           Z
 ---------------------------------------------------------------------
      1          6           0       -5.083913    0.049586   -0.000003
      2          6           0       -4.044130    0.998617   -0.000005
      3          6           0       -2.711629    0.591286   -0.000010
      4          6           0       -2.424677   -0.804236   -0.000009
      5          6           0       -3.468792   -1.735181   -0.000013
      6          6           0       -4.809481   -1.305707   -0.000008
      7          1           0       -6.113413    0.391312    0.000001
      8          1           0       -4.259203    2.058715   -0.000004
      9          1           0       -3.284854   -2.804574   -0.000022
     10          1           0       -5.608432   -2.036450   -0.000010
     11          6           0       -1.040513   -1.204251    0.000002
     12          6           0       -1.631008    1.588363   -0.000022
     13          6           0        0.055082   -0.265764   -0.000006
     14          6           0       -0.245384    1.122577   -0.000012
     15          6           0        1.374848   -0.719639   -0.000003
     16          6           0        0.817169    2.031325   -0.000008
     17          6           0        2.419867    0.228368   -0.000001
     18          1           0        1.589771   -1.778195    0.000000
     19          6           0        2.150187    1.581222   -0.000003
     20          1           0        0.598927    3.090398   -0.000011
     21          1           0        2.959978    2.300977   -0.000002
     22         35           0        4.230458   -0.396050    0.000005
     23          8           0       -1.897006    2.814623    0.000019
     24          8           0       -0.685127   -2.467477    0.000033
     25          1           0       -1.437473   -3.076978    0.000053
 ---------------------------------------------------------------------
 Rotational constants (GHZ):      0.9895013      0.1761075      0.1495001
 Leave Link  202 at Fri Jan 10 20:30:32 2020, MaxMem=   134217728 cpu:         0.0
 (Enter E:\Gaussian\G09W\l301.exe)
 Standard basis: 6-311G(d) (5D, 7F)
 Ernie: Thresh=  0.10000D-02 Tol=  0.10000D-05 Strict=F.
 There are   375 symmetry adapted cartesian basis functions of A   symmetry.
 There are   356 symmetry adapted basis functions of A   symmetry.
   356 basis functions,   642 primitive gaussians,   375 cartesian basis functions
    72 alpha electrons       71 beta electrons
       nuclear repulsion energy      1391.5280393507 Hartrees.
 IExCor=  402 DFT=T Ex+Corr=B3LYP ExCW=0 ScaHFX=  0.200000
 ScaDFX=  0.800000  0.720000  1.000000  0.810000 ScalE2=  1.000000  1.000000
 IRadAn=      0 IRanWt=     -1 IRanGd=            0 ICorTp=0 IEmpDi=141
 NAtoms=   25 NActive=   25 NUniq=   25 SFac= 1.00D+00 NAtFMM=   60 NAOKFM=F Big=F
 Integral buffers will be    262144 words long.
 Raffenetti 2 integral format.
 Two-electron integral symmetry is turned on.
 R6Disp:  Grimme-D3(BJ) Dispersion energy=       -0.0633028117 Hartrees.
 Nuclear repulsion after empirical dispersion term =     1391.4647365389 Hartrees.
 ------------------------------------------------------------------------------
 Polarizable Continuum Model (PCM)
 =================================
 Model                : PCM (using non-symmetric T matrix).
 Atomic radii         : UFF (Universal Force Field).
 Polarization charges : Total charges.
 Charge compensation  : None.
 Solution method      : On-the-fly selection.
 Cavity type          : Scaled VdW (van der Waals Surface) (Alpha=1.100).
 Cavity algorithm     : GePol (No added spheres)
                        Default sphere list used, NSphG=   25.
                        Lebedev-Laikov grids with approx.  5.0 points / Ang**2.
                        Smoothing algorithm: Karplus/York (Gamma=1.0000).
                        Polarization charges: spherical gaussians, with
                                              point-specific exponents (IZeta= 3).
                        Self-potential: point-specific (ISelfS= 7).
                        Self-field    : sphere-specific E.n sum rule (ISelfD= 2).
 1st derivatives      : Analytical E(r).r(x)/FMM algorithm (CHGder, D1EAlg=3).
                        Cavity 1st derivative terms included.
 Solvent              : Acetonitrile, Eps=  35.688000 Eps(inf)=   1.806874
 ------------------------------------------------------------------------------
 GePol: Number of generator spheres                  =      25
 GePol: Total number of spheres                      =      25
 GePol: Number of exposed spheres                    =      25 (100.00%)
 GePol: Number of points                             =    2193
 GePol: Average weight of points                     =       0.13
 GePol: Minimum weight of points                     =   0.25D-10
 GePol: Maximum weight of points                     =    0.20577
 GePol: Number of points with low weight             =     137
 GePol: Fraction of low-weight points (<1% of avg)   =       6.25%
 GePol: Cavity surface area                          =    281.137 Ang**2
 GePol: Cavity volume                                =    307.973 Ang**3
 Leave Link  301 at Fri Jan 10 20:30:32 2020, MaxMem=   134217728 cpu:         0.0
 (Enter E:\Gaussian\G09W\l302.exe)
 NPDir=0 NMtPBC=     1 NCelOv=     1 NCel=       1 NClECP=     1 NCelD=      1
         NCelK=      1 NCelE2=     1 NClLst=     1 CellRange=     0.0.
 One-electron integrals computed using PRISM.
 NBasis=   356 RedAO= T EigKep=  8.64D-05  NBF=   356
 NBsUse=   356 1.00D-06 EigRej= -1.00D+00 NBFU=   356
 Precomputing XC quadrature grid using
 IXCGrd= 4 IRadAn=           0 IRanWt=          -1 IRanGd=           0 AccXCQ= 0.00D+00.
 Generated NRdTot=       0 NPtTot=           0 NUsed=           0 NTot=          16
 NSgBfM=   366   366   366   366   366 MxSgAt=    25 MxSgA2=    25.
 Leave Link  302 at Fri Jan 10 20:30:34 2020, MaxMem=   134217728 cpu:         2.0
 (Enter E:\Gaussian\G09W\l308.exe)
 Leave Link  308 at Fri Jan 10 20:30:35 2020, MaxMem=   134217728 cpu:         1.0
 (Enter E:\Gaussian\G09W\l303.exe)
 DipDrv:  MaxL=1.
 Leave Link  303 at Fri Jan 10 20:30:35 2020, MaxMem=   134217728 cpu:         0.0
 (Enter E:\Gaussian\G09W\l401.exe)
 Initial guess from the checkpoint file:  "E:\Gaussian file\2-BrHAQ excited opt.chk"
 B after Tr=     0.000000    0.000000    0.000000
         Rot=    1.000000    0.000000    0.000001   -0.000066 Ang=   0.01 deg.
 Guess basis will be translated and rotated to current coordinates.
 JPrj=2 DoOrth=T DoCkMO=T.
 Initial guess <Sx>= 0.0000 <Sy>= 0.0000 <Sz>= 0.5000 <S**2>= 0.7731 S= 0.5115
 Leave Link  401 at Fri Jan 10 20:30:37 2020, MaxMem=   134217728 cpu:         2.0
 (Enter E:\Gaussian\G09W\l502.exe)
 UHF open shell SCF:
 Using DIIS extrapolation, IDIIS=  1040.
 Integral symmetry usage will be decided dynamically.
 IVT=      444890 IEndB=      444890 NGot=   134217728 MDV=   133930479
 LenX=   133930479 LenY=   133789413
 Requested convergence on RMS density matrix=1.00D-08 within 128 cycles.
 Requested convergence on MAX density matrix=1.00D-06.
 Requested convergence on             energy=1.00D-06.
 No special actions if energy rises.
 Fock matrices will be formed incrementally for  20 cycles.

 Cycle   1  Pass 1  IDiag  1:
 FoFJK:  IHMeth= 1 ICntrl=       0 DoSepK=F KAlg= 0 I1Cent=   0 FoldK=F
 IRaf= 780000000 NMat=   1 IRICut=       1 DoRegI=T DoRafI=F ISym2E= 0.
 FoFCou: FMM=F IPFlag=           0 FMFlag=      100000 FMFlg1=           0
         NFxFlg=           0 DoJE=F BraDBF=F KetDBF=F FulRan=T
         wScrn=  0.000000 ICntrl=       0 IOpCl=  1 I1Cent=           0 NGrid=           0
         NMat0=    1 NMatS0=      1 NMatT0=    0 NMatD0=    1 NMtDS0=    0 NMtDT0=    0
 Symmetry not used in FoFCou.
 Inv3:  Mode=1 IEnd=    14427747.
 Iteration    1 A*A^-1 deviation from unit magnitude is 2.33D-15 for   1038.
 Iteration    1 A*A^-1 deviation from orthogonality  is 1.73D-15 for   1297    228.
 Iteration    1 A^-1*A deviation from unit magnitude is 2.89D-15 for   1172.
 Iteration    1 A^-1*A deviation from orthogonality  is 2.69D-12 for   2064   1552.
 E= -3263.11849076172    
 DIIS: error= 3.99D-05 at cycle   1 NSaved=   1.
 NSaved= 1 IEnMin= 1 EnMin= -3263.11849076172     IErMin= 1 ErrMin= 3.99D-05
 ErrMax= 3.99D-05  0.00D+00 EMaxC= 1.00D-01 BMatC= 6.26D-06 BMatP= 6.26D-06
 IDIUse=1 WtCom= 1.00D+00 WtEn= 0.00D+00
 Coeff-Com:  0.100D+01
 Coeff:      0.100D+01
 Gap=     0.721 Goal=   None    Shift=    0.000
 Gap=     0.796 Goal=   None    Shift=    0.000
 RMSDP=1.09D-05 MaxDP=3.50D-04              OVMax= 4.53D-04

 Cycle   2  Pass 1  IDiag  1:
 RMSU=  1.09D-05    CP:  1.00D+00
 E= -3263.11849291512     Delta-E=       -0.000002153394 Rises=F Damp=F
 DIIS: error= 1.99D-05 at cycle   2 NSaved=   2.
 NSaved= 2 IEnMin= 2 EnMin= -3263.11849291512     IErMin= 2 ErrMin= 1.99D-05
 ErrMax= 1.99D-05  0.00D+00 EMaxC= 1.00D-01 BMatC= 2.95D-07 BMatP= 6.26D-06
 IDIUse=1 WtCom= 1.00D+00 WtEn= 0.00D+00
 Coeff-Com:  0.260D-01 0.974D+00
 Coeff:      0.260D-01 0.974D+00
 Gap=     0.100 Goal=   None    Shift=    0.000
 Gap=     0.140 Goal=   None    Shift=    0.000
 RMSDP=2.78D-06 MaxDP=8.34D-05 DE=-2.15D-06 OVMax= 1.74D-04

 Cycle   3  Pass 1  IDiag  1:
 RMSU=  2.76D-06    CP:  1.00D+00  9.79D-01
 E= -3263.11849283990     Delta-E=        0.000000075218 Rises=F Damp=F
 DIIS: error= 3.11D-05 at cycle   3 NSaved=   3.
 NSaved= 3 IEnMin= 2 EnMin= -3263.11849291512     IErMin= 2 ErrMin= 1.99D-05
 ErrMax= 3.11D-05  0.00D+00 EMaxC= 1.00D-01 BMatC= 6.99D-07 BMatP= 2.95D-07
 IDIUse=1 WtCom= 1.00D+00 WtEn= 0.00D+00
 Coeff-Com: -0.251D-01 0.628D+00 0.397D+00
 Coeff:     -0.251D-01 0.628D+00 0.397D+00
 Gap=     0.100 Goal=   None    Shift=    0.000
 Gap=     0.140 Goal=   None    Shift=    0.000
 RMSDP=2.06D-06 MaxDP=8.74D-05 DE= 7.52D-08 OVMax= 1.16D-04

 Cycle   4  Pass 1  IDiag  1:
 RMSU=  8.39D-07    CP:  1.00D+00  1.02D+00  3.53D-01
 E= -3263.11849299117     Delta-E=       -0.000000151273 Rises=F Damp=F
 DIIS: error= 6.35D-06 at cycle   4 NSaved=   4.
 NSaved= 4 IEnMin= 4 EnMin= -3263.11849299117     IErMin= 4 ErrMin= 6.35D-06
 ErrMax= 6.35D-06  0.00D+00 EMaxC= 1.00D-01 BMatC= 2.13D-08 BMatP= 2.95D-07
 IDIUse=1 WtCom= 1.00D+00 WtEn= 0.00D+00
 Coeff-Com: -0.141D-01 0.226D+00 0.198D+00 0.590D+00
 Coeff:     -0.141D-01 0.226D+00 0.198D+00 0.590D+00
 Gap=     0.100 Goal=   None    Shift=    0.000
 Gap=     0.140 Goal=   None    Shift=    0.000
 RMSDP=5.10D-07 MaxDP=2.35D-05 DE=-1.51D-07 OVMax= 3.19D-05

 Cycle   5  Pass 1  IDiag  1:
 RMSU=  2.60D-07    CP:  1.00D+00  1.02D+00  4.46D-01  6.03D-01
 E= -3263.11849299443     Delta-E=       -0.000000003264 Rises=F Damp=F
 DIIS: error= 2.36D-06 at cycle   5 NSaved=   5.
 NSaved= 5 IEnMin= 5 EnMin= -3263.11849299443     IErMin= 5 ErrMin= 2.36D-06
 ErrMax= 2.36D-06  0.00D+00 EMaxC= 1.00D-01 BMatC= 5.26D-09 BMatP= 2.13D-08
 IDIUse=1 WtCom= 1.00D+00 WtEn= 0.00D+00
 Coeff-Com: -0.593D-02 0.749D-01 0.818D-01 0.379D+00 0.470D+00
 Coeff:     -0.593D-02 0.749D-01 0.818D-01 0.379D+00 0.470D+00
 Gap=     0.100 Goal=   None    Shift=    0.000
 Gap=     0.140 Goal=   None    Shift=    0.000
 RMSDP=2.07D-07 MaxDP=9.26D-06 DE=-3.26D-09 OVMax= 2.32D-05

 Cycle   6  Pass 1  IDiag  1:
 RMSU=  1.02D-07    CP:  1.00D+00  1.02D+00  4.08D-01  7.29D-01  6.80D-01
 E= -3263.11849299555     Delta-E=       -0.000000001120 Rises=F Damp=F
 DIIS: error= 8.93D-07 at cycle   6 NSaved=   6.
 NSaved= 6 IEnMin= 6 EnMin= -3263.11849299555     IErMin= 6 ErrMin= 8.93D-07
 ErrMax= 8.93D-07  0.00D+00 EMaxC= 1.00D-01 BMatC= 3.44D-10 BMatP= 5.26D-09
 IDIUse=1 WtCom= 1.00D+00 WtEn= 0.00D+00
 Coeff-Com: -0.551D-03-0.240D-02 0.431D-02 0.799D-01 0.221D+00 0.698D+00
 Coeff:     -0.551D-03-0.240D-02 0.431D-02 0.799D-01 0.221D+00 0.698D+00
 Gap=     0.100 Goal=   None    Shift=    0.000
 Gap=     0.140 Goal=   None    Shift=    0.000
 RMSDP=4.39D-08 MaxDP=1.75D-06 DE=-1.12D-09 OVMax= 1.02D-05

 Cycle   7  Pass 1  IDiag  1:
 RMSU=  3.25D-08    CP:  1.00D+00  1.02D+00  4.13D-01  7.32D-01  7.78D-01
                    CP:  9.67D-01
 E= -3263.11849299573     Delta-E=       -0.000000000176 Rises=F Damp=F
 DIIS: error= 4.03D-07 at cycle   7 NSaved=   7.
 NSaved= 7 IEnMin= 7 EnMin= -3263.11849299573     IErMin= 7 ErrMin= 4.03D-07
 ErrMax= 4.03D-07  0.00D+00 EMaxC= 1.00D-01 BMatC= 9.67D-11 BMatP= 3.44D-10
 IDIUse=1 WtCom= 1.00D+00 WtEn= 0.00D+00
 Coeff-Com:  0.646D-03-0.131D-01-0.116D-01-0.176D-01 0.442D-01 0.386D+00
 Coeff-Com:  0.612D+00
 Coeff:      0.646D-03-0.131D-01-0.116D-01-0.176D-01 0.442D-01 0.386D+00
 Coeff:      0.612D+00
 Gap=     0.100 Goal=   None    Shift=    0.000
 Gap=     0.140 Goal=   None    Shift=    0.000
 RMSDP=2.27D-08 MaxDP=8.64D-07 DE=-1.76D-10 OVMax= 6.41D-06

 Cycle   8  Pass 1  IDiag  1:
 RMSU=  1.69D-08    CP:  1.00D+00  1.02D+00  4.14D-01  7.42D-01  7.84D-01
                    CP:  1.08D+00  1.13D+00
 E= -3263.11849299570     Delta-E=        0.000000000027 Rises=F Damp=F
 DIIS: error= 1.61D-07 at cycle   8 NSaved=   8.
 NSaved= 8 IEnMin= 7 EnMin= -3263.11849299573     IErMin= 8 ErrMin= 1.61D-07
 ErrMax= 1.61D-07  0.00D+00 EMaxC= 1.00D-01 BMatC= 1.54D-11 BMatP= 9.67D-11
 IDIUse=1 WtCom= 1.00D+00 WtEn= 0.00D+00
 Coeff-Com:  0.330D-03-0.246D-02-0.528D-02-0.291D-01-0.563D-01-0.120D+00
 Coeff-Com:  0.168D+00 0.104D+01
 Coeff:      0.330D-03-0.246D-02-0.528D-02-0.291D-01-0.563D-01-0.120D+00
 Coeff:      0.168D+00 0.104D+01
 Gap=     0.100 Goal=   None    Shift=    0.000
 Gap=     0.140 Goal=   None    Shift=    0.000
 RMSDP=2.07D-08 MaxDP=9.65D-07 DE= 2.73D-11 OVMax= 6.62D-06

 Cycle   9  Pass 1  IDiag  1:
 RMSU=  8.55D-09    CP:  1.00D+00  1.02D+00  4.14D-01  7.46D-01  8.00D-01
                    CP:  1.18D+00  1.52D+00  1.40D+00
 E= -3263.11849299576     Delta-E=       -0.000000000057 Rises=F Damp=F
 DIIS: error= 9.74D-08 at cycle   9 NSaved=   9.
 NSaved= 9 IEnMin= 9 EnMin= -3263.11849299576     IErMin= 9 ErrMin= 9.74D-08
 ErrMax= 9.74D-08  0.00D+00 EMaxC= 1.00D-01 BMatC= 5.91D-12 BMatP= 1.54D-11
 IDIUse=1 WtCom= 1.00D+00 WtEn= 0.00D+00
 Coeff-Com:  0.133D-04 0.199D-02-0.282D-03-0.106D-01-0.389D-01-0.144D+00
 Coeff-Com: -0.350D-01 0.559D+00 0.668D+00
 Coeff:      0.133D-04 0.199D-02-0.282D-03-0.106D-01-0.389D-01-0.144D+00
 Coeff:     -0.350D-01 0.559D+00 0.668D+00
 Gap=     0.100 Goal=   None    Shift=    0.000
 Gap=     0.140 Goal=   None    Shift=    0.000
 RMSDP=8.08D-09 MaxDP=4.13D-07 DE=-5.73D-11 OVMax= 1.94D-06

 Error on total polarization charges =  0.01434
 SCF Done:  E(UB3LYP) =  -3263.11849300     A.U. after    9 cycles
            NFock=  9  Conv=0.81D-08     -V/T= 2.0018
 <Sx>= 0.0000 <Sy>= 0.0000 <Sz>= 0.5000 <S**2>= 0.7731 S= 0.5115
 <L.S>= 0.000000000000E+00
 KE= 3.257375365507D+03 PE=-1.054116953640D+04 EE= 2.629210941360D+03
 Annihilation of the first spin contaminant:
 S**2 before annihilation     0.7731,   after     0.7504
 Leave Link  502 at Fri Jan 10 20:42:33 2020, MaxMem=   134217728 cpu:       716.0
 (Enter E:\Gaussian\G09W\l801.exe)
 DoSCS=F DFT=T ScalE2(SS,OS)=  1.000000  1.000000
 ExpMin= 1.03D-01 ExpMax= 4.40D+05 ExpMxC= 1.51D+04 IAcc=3 IRadAn=         5 AccDes= 0.00D+00
 HarFok:  IExCor=  205 AccDes= 0.00D+00 IRadAn=         5 IDoV=-2 UseB2=F ITyADJ=14
 ICtDFT= 12500011 ScaDFX=  1.000000  1.000000  1.000000  1.000000
 Largest valence mixing into a core orbital is  2.26D-04
 Largest core mixing into a valence orbital is  1.80D-05
 Largest valence mixing into a core orbital is  2.26D-04
 Largest core mixing into a valence orbital is  1.91D-05
 Range of M.O.s used for correlation:    31   356
 NBasis=   356 NAE=    72 NBE=    71 NFC=    30 NFV=     0
 NROrb=    326 NOA=    42 NOB=    41 NVA=   284 NVB=   285

 **** Warning!!: The largest alpha MO coefficient is  0.21183239D+02


 **** Warning!!: The smallest alpha delta epsilon is  0.99835092D-01


 **** Warning!!: The largest beta MO coefficient is  0.21179702D+02

 Leave Link  801 at Fri Jan 10 20:42:35 2020, MaxMem=   134217728 cpu:         1.0
 (Enter E:\Gaussian\G09W\l914.exe)
 UHF ground state
 MDV=   134217728 DFT=T DoStab=F Mixed=T DoRPA=T DoScal=F NonHer=T
 NEqPCM:  Using equilibrium solvation (IEInf=0, Eps=  35.6880, EpsInf=   1.8069)
 Making orbital integer symmetry assigments:
 Orbital symmetries:
 Alpha Orbitals:
       Occupied  (A) (A) (A) (A) (A) (A) (A) (A) (A) (A) (A) (A)
                 (A) (A) (A) (A) (A) (A) (A) (A) (A) (A) (A) (A)
                 (A) (A) (A) (A) (A) (A) (A) (A) (A) (A) (A) (A)
                 (A) (A) (A) (A) (A) (A) (A) (A) (A) (A) (A) (A)
                 (A) (A) (A) (A) (A) (A) (A) (A) (A) (A) (A) (A)
                 (A) (A) (A) (A) (A) (A) (A) (A) (A) (A) (A) (A)
       Virtual   (A) (A) (A) (A) (A) (A) (A) (A) (A) (A) (A) (A)
                 (A) (A) (A) (A) (A) (A) (A) (A) (A) (A) (A) (A)
                 (A) (A) (A) (A) (A) (A) (A) (A) (A) (A) (A) (A)
                 (A) (A) (A) (A) (A) (A) (A) (A) (A) (A) (A) (A)
                 (A) (A) (A) (A) (A) (A) (A) (A) (A) (A) (A) (A)
                 (A) (A) (A) (A) (A) (A) (A) (A) (A) (A) (A) (A)
                 (A) (A) (A) (A) (A) (A) (A) (A) (A) (A) (A) (A)
                 (A) (A) (A) (A) (A) (A) (A) (A) (A) (A) (A) (A)
                 (A) (A) (A) (A) (A) (A) (A) (A) (A) (A) (A) (A)
                 (A) (A) (A) (A) (A) (A) (A) (A) (A) (A) (A) (A)
                 (A) (A) (A) (A) (A) (A) (A) (A) (A) (A) (A) (A)
                 (A) (A) (A) (A) (A) (A) (A) (A) (A) (A) (A) (A)
                 (A) (A) (A) (A) (A) (A) (A) (A) (A) (A) (A) (A)
                 (A) (A) (A) (A) (A) (A) (A) (A) (A) (A) (A) (A)
                 (A) (A) (A) (A) (A) (A) (A) (A) (A) (A) (A) (A)
                 (A) (A) (A) (A) (A) (A) (A) (A) (A) (A) (A) (A)
                 (A) (A) (A) (A) (A) (A) (A) (A) (A) (A) (A) (A)
                 (A) (A) (A) (A) (A) (A) (A) (A) (A) (A) (A) (A)
                 (A) (A) (A) (A) (A) (A) (A) (A) (A) (A) (A) (A)
                 (A) (A) (A) (A) (A) (A) (A) (A) (A) (A) (A) (A)
                 (A) (A) (A) (A) (A) (A) (A) (A) (A) (A) (A) (A)
                 (A) (A) (A) (A) (A) (A) (A) (A) (A) (A) (A) (A)
                 (A) (A) (A) (A) (A) (A) (A) (A) (A) (A) (A) (A)
                 (A) (A) (A) (A) (A) (A) (A) (A)
 Beta  Orbitals:
       Occupied  (A) (A) (A) (A) (A) (A) (A) (A) (A) (A) (A) (A)
                 (A) (A) (A) (A) (A) (A) (A) (A) (A) (A) (A) (A)
                 (A) (A) (A) (A) (A) (A) (A) (A) (A) (A) (A) (A)
                 (A) (A) (A) (A) (A) (A) (A) (A) (A) (A) (A) (A)
                 (A) (A) (A) (A) (A) (A) (A) (A) (A) (A) (A) (A)
                 (A) (A) (A) (A) (A) (A) (A) (A) (A) (A) (A)
       Virtual   (A) (A) (A) (A) (A) (A) (A) (A) (A) (A) (A) (A)
                 (A) (A) (A) (A) (A) (A) (A) (A) (A) (A) (A) (A)
                 (A) (A) (A) (A) (A) (A) (A) (A) (A) (A) (A) (A)
                 (A) (A) (A) (A) (A) (A) (A) (A) (A) (A) (A) (A)
                 (A) (A) (A) (A) (A) (A) (A) (A) (A) (A) (A) (A)
                 (A) (A) (A) (A) (A) (A) (A) (A) (A) (A) (A) (A)
                 (A) (A) (A) (A) (A) (A) (A) (A) (A) (A) (A) (A)
                 (A) (A) (A) (A) (A) (A) (A) (A) (A) (A) (A) (A)
                 (A) (A) (A) (A) (A) (A) (A) (A) (A) (A) (A) (A)
                 (A) (A) (A) (A) (A) (A) (A) (A) (A) (A) (A) (A)
                 (A) (A) (A) (A) (A) (A) (A) (A) (A) (A) (A) (A)
                 (A) (A) (A) (A) (A) (A) (A) (A) (A) (A) (A) (A)
                 (A) (A) (A) (A) (A) (A) (A) (A) (A) (A) (A) (A)
                 (A) (A) (A) (A) (A) (A) (A) (A) (A) (A) (A) (A)
                 (A) (A) (A) (A) (A) (A) (A) (A) (A) (A) (A) (A)
                 (A) (A) (A) (A) (A) (A) (A) (A) (A) (A) (A) (A)
                 (A) (A) (A) (A) (A) (A) (A) (A) (A) (A) (A) (A)
                 (A) (A) (A) (A) (A) (A) (A) (A) (A) (A) (A) (A)
                 (A) (A) (A) (A) (A) (A) (A) (A) (A) (A) (A) (A)
                 (A) (A) (A) (A) (A) (A) (A) (A) (A) (A) (A) (A)
                 (A) (A) (A) (A) (A) (A) (A) (A) (A) (A) (A) (A)
                 (A) (A) (A) (A) (A) (A) (A) (A) (A) (A) (A) (A)
                 (A) (A) (A) (A) (A) (A) (A) (A) (A) (A) (A) (A)
                 (A) (A) (A) (A) (A) (A) (A) (A) (A)
 Generating guess from densities on rwf.
 Convergence on wavefunction:    0.000001000000000
 Davidson Disk Diagonalization:  ConvIn= 1.00D-06 SkipCon=T Conv= 1.00D-06.
 Max sub-space:   200 roots to seek:     3 dimension of matrix:        23613
 Iteration     1 Dimension     6 NMult     0 NNew      6
 CISAX will form     6 AO SS matrices at one time.
 NMat=     6 NSing=     6 JSym2X= 0.
 FoFJK:  IHMeth= 1 ICntrl=       0 DoSepK=F KAlg= 0 I1Cent=   0 FoldK=F
 IRaf=         0 NMat=  12 IRICut=       1 DoRegI=T DoRafI=F ISym2E= 0.
 FoFCou: FMM=F IPFlag=           0 FMFlag=      100000 FMFlg1=           0
         NFxFlg=           0 DoJE=F BraDBF=F KetDBF=F FulRan=T
         wScrn=  0.000000 ICntrl=       0 IOpCl=  1 I1Cent=           0 NGrid=           0
         NMat0=   12 NMatS0=      6 NMatT0=    0 NMatD0=   12 NMtDS0=    0 NMtDT0=    0
 Symmetry not used in FoFCou.
 Excitation Energies [eV] at current iteration:
 Root      1 :     1.788007568883128
 Root      2 :     2.407184868422474
 Root      3 :     2.832386661555312
 Iteration     2 Dimension    12 NMult     6 NNew      6
 CISAX will form     6 AO SS matrices at one time.
 NMat=     6 NSing=     6 JSym2X= 0.
 Root      1 not converged, maximum delta is    0.000322665759443
 Root      2 not converged, maximum delta is    0.000410820303861
 Root      3 not converged, maximum delta is    0.000676912278856
 Excitation Energies [eV] at current iteration:
 Root      1 :     1.788006028006753   Change is   -0.000001540876375
 Root      2 :     2.407181027795900   Change is   -0.000003840626573
 Root      3 :     2.832385071283667   Change is   -0.000001590271646
 Iteration     3 Dimension    18 NMult    12 NNew      6
 CISAX will form     6 AO SS matrices at one time.
 NMat=     6 NSing=     6 JSym2X= 0.
 Root      1 not converged, maximum delta is    0.000124289082285
 Root      2 not converged, maximum delta is    0.000052147702326
 Root      3 not converged, maximum delta is    0.000849707710030
 Excitation Energies [eV] at current iteration:
 Root      1 :     1.788005832602451   Change is   -0.000000195404301
 Root      2 :     2.407180937216457   Change is   -0.000000090579443
 Root      3 :     2.832384187647589   Change is   -0.000000883636078
 Iteration     4 Dimension    24 NMult    18 NNew      6
 CISAX will form     6 AO SS matrices at one time.
 NMat=     6 NSing=     6 JSym2X= 0.
 Root      1 not converged, maximum delta is    0.000022836129974
 Root      2 not converged, maximum delta is    0.000006227654191
 Root      3 not converged, maximum delta is    0.000517582506689
 Excitation Energies [eV] at current iteration:
 Root      1 :     1.788005813195565   Change is   -0.000000019406886
 Root      2 :     2.407180931503994   Change is   -0.000000005712463
 Root      3 :     2.832383763416335   Change is   -0.000000424231254
 Iteration     5 Dimension    30 NMult    24 NNew      6
 CISAX will form     6 AO SS matrices at one time.
 NMat=     6 NSing=     6 JSym2X= 0.
 Root      1 not converged, maximum delta is    0.000019615297112
 Root      2 not converged, maximum delta is    0.000001563566614
 Root      3 not converged, maximum delta is    0.000357715071511
 Excitation Energies [eV] at current iteration:
 Root      1 :     1.788005807604600   Change is   -0.000000005590966
 Root      2 :     2.407180930662378   Change is   -0.000000000841616
 Root      3 :     2.832383525234957   Change is   -0.000000238181378
 Iteration     6 Dimension    36 NMult    30 NNew      6
 CISAX will form     6 AO SS matrices at one time.
 NMat=     6 NSing=     6 JSym2X= 0.
 Root      1 not converged, maximum delta is    0.000002820505836
 Root      2 not converged, maximum delta is    0.000001125228219
 Root      3 not converged, maximum delta is    0.000253006215585
 Excitation Energies [eV] at current iteration:
 Root      1 :     1.788005806797424   Change is   -0.000000000807176
 Root      2 :     2.407180930571434   Change is   -0.000000000090944
 Root      3 :     2.832383371809203   Change is   -0.000000153425754
 Iteration     7 Dimension    42 NMult    36 NNew      6
 CISAX will form     6 AO SS matrices at one time.
 NMat=     6 NSing=     6 JSym2X= 0.
 Root      1 has converged.
 Root      2 has converged.
 Root      3 not converged, maximum delta is    0.000182972757627
 Excitation Energies [eV] at current iteration:
 Root      1 :     1.788005806681102   Change is   -0.000000000116322
 Root      2 :     2.407180930557159   Change is   -0.000000000014275
 Root      3 :     2.832383267375157   Change is   -0.000000104434046
 Iteration     8 Dimension    44 NMult    42 NNew      2
 CISAX will form     2 AO SS matrices at one time.
 NMat=     2 NSing=     2 JSym2X= 0.
 Root      1 has converged.
 Root      2 has converged.
 Root      3 not converged, maximum delta is    0.000128137012918
 Excitation Energies [eV] at current iteration:
 Root      1 :     1.788005806679263   Change is   -0.000000000001839
 Root      2 :     2.407180930556578   Change is   -0.000000000000580
 Root      3 :     2.832383216056894   Change is   -0.000000051318263
 Iteration     9 Dimension    46 NMult    44 NNew      2
 CISAX will form     2 AO SS matrices at one time.
 NMat=     2 NSing=     2 JSym2X= 0.
 Root      1 has converged.
 Root      2 has converged.
 Root      3 not converged, maximum delta is    0.000044883254156
 Excitation Energies [eV] at current iteration:
 Root      1 :     1.788005806673102   Change is   -0.000000000006161
 Root      2 :     2.407180930557944   Change is    0.000000000001366
 Root      3 :     2.832383199364556   Change is   -0.000000016692339
 Iteration    10 Dimension    48 NMult    46 NNew      2
 CISAX will form     2 AO SS matrices at one time.
 NMat=     2 NSing=     2 JSym2X= 0.
 Root      1 has converged.
 Root      2 has converged.
 Root      3 not converged, maximum delta is    0.000009516131547
 Excitation Energies [eV] at current iteration:
 Root      1 :     1.788005806671676   Change is   -0.000000000001425
 Root      2 :     2.407180930556510   Change is   -0.000000000001434
 Root      3 :     2.832383196849526   Change is   -0.000000002515029
 Iteration    11 Dimension    50 NMult    48 NNew      2
 CISAX will form     2 AO SS matrices at one time.
 NMat=     2 NSing=     2 JSym2X= 0.
 Root      1 has converged.
 Root      2 has converged.
 Root      3 not converged, maximum delta is    0.000003281522909
 Excitation Energies [eV] at current iteration:
 Root      1 :     1.788005806670618   Change is   -0.000000000001058
 Root      2 :     2.407180930556920   Change is    0.000000000000410
 Root      3 :     2.832383196356406   Change is   -0.000000000493120
 Iteration    12 Dimension    52 NMult    50 NNew      2
 CISAX will form     2 AO SS matrices at one time.
 NMat=     2 NSing=     2 JSym2X= 0.
 Root      1 has converged.
 Root      2 has converged.
 Root      3 not converged, maximum delta is    0.000003456776101
 Excitation Energies [eV] at current iteration:
 Root      1 :     1.788005806670481   Change is   -0.000000000000138
 Root      2 :     2.407180930556886   Change is   -0.000000000000034
 Root      3 :     2.832383196257056   Change is   -0.000000000099350
 Iteration    13 Dimension    54 NMult    52 NNew      2
 CISAX will form     2 AO SS matrices at one time.
 NMat=     2 NSing=     2 JSym2X= 0.
 Root      1 has converged.
 Root      2 has converged.
 Root      3 not converged, maximum delta is    0.000001769324672
 Excitation Energies [eV] at current iteration:
 Root      1 :     1.788005806668688   Change is   -0.000000000001793
 Root      2 :     2.407180930556203   Change is   -0.000000000000683
 Root      3 :     2.832383196239293   Change is   -0.000000000017763
 Iteration    14 Dimension    56 NMult    54 NNew      2
 CISAX will form     2 AO SS matrices at one time.
 NMat=     2 NSing=     2 JSym2X= 0.
 Root      1 has converged.
 Root      2 has converged.
 Root      3 has converged.
 Excitation Energies [eV] at current iteration:
 Root      1 :     1.788005806668320   Change is   -0.000000000000368
 Root      2 :     2.407180930556647   Change is    0.000000000000444
 Root      3 :     2.832383196235955   Change is   -0.000000000003338
 Convergence achieved on expansion vectors.
 ***********************************************************************
 Excited states from <AA,BB:AA,BB> singles matrix:
 ***********************************************************************
 
 ExtSpn:  IState=     1 X2= 1.009 Y2= 0.009 X2-Y2-1=-4.88D-15
          S2Grnd=  0.773 Ra=  0.004 Rb=  0.007 T= -0.001 S2Ext=  0.009 S2=  0.782
 ExtSpn:  IState=     2 X2= 1.002 Y2= 0.002 X2-Y2-1=-7.77D-16
          S2Grnd=  0.773 Ra=  0.016 Rb=  0.193 T=  0.114 S2Ext=  0.324 S2=  1.097
 ExtSpn:  IState=     3 X2= 1.013 Y2= 0.013 X2-Y2-1= 8.88D-16
          S2Grnd=  0.773 Ra=  0.058 Rb=  0.071 T=  0.122 S2Ext=  0.251 S2=  1.024
 1PDM for each excited state written to RWF  633
 Ground to excited state transition densities written to RWF  633
 Ground to excited state transition electric dipole moments (Au):
       state          X           Y           Z        Dip. S.      Osc.
         1         0.0636     -0.8173      0.0000      0.6721      0.0294
         2         0.0000      0.0000     -0.0007      0.0000      0.0000
         3        -0.9212      0.2638      0.0000      0.9183      0.0637
 Ground to excited state transition velocity dipole moments (Au):
       state          X           Y           Z        Dip. S.      Osc.
         1        -0.0072      0.0654      0.0000      0.0043      0.0439
         2         0.0000      0.0000      0.0001      0.0000      0.0000
         3         0.0973     -0.0275      0.0000      0.0102      0.0655
 Ground to excited state transition magnetic dipole moments (Au):
       state          X           Y           Z
         1         0.0000      0.0000     -0.1681
         2         0.0818     -0.3726      0.0000
         3         0.0000      0.0000     -0.3488
 Ground to excited state transition velocity quadrupole moments (Au):
       state          XX          YY          ZZ          XY          XZ          YZ
         1        -0.0002      0.0499      0.0005     -0.1902      0.0000      0.0000
         2         0.0000      0.0000      0.0000      0.0000      0.0082      0.0015
         3        -0.0506     -0.1289      0.0083      0.0010      0.0000      0.0000
 <0|del|b> * <b|rxdel|0> + <0|del|b> * <b|delr+rdel|0>
 Rotatory Strengths (R) in cgs (10**-40 erg-esu-cm/Gauss)
       state          XX          YY          ZZ    R(velocity)    E-M Angle
         1         0.0008     -0.0001      0.0004      0.0004       90.00
         2        -0.0003     -0.0010     -0.0013     -0.0009       90.00
         3         0.0018      0.0008      0.0030      0.0019       90.00
 1/2[<0|r|b>*<b|rxdel|0> + (<0|rxdel|b>*<b|r|0>)*]
 Rotatory Strengths (R) in cgs (10**-40 erg-esu-cm/Gauss)
       state          XX          YY          ZZ     R(length)
         1         0.0000     -0.0001      0.0006      0.0001
         2        -0.0019     -0.0006      0.0000     -0.0008
         3         0.0021      0.0036     -0.0001      0.0019
  1/2[<0|del|b>*<b|r|0> + (<0|r|b>*<b|del|0>)*] (Au)
       state          X           Y           Z        Dip. S.   Osc.(frdel)
         1        -0.0005     -0.0534      0.0000      0.0539      0.0359
         2         0.0000      0.0000      0.0000      0.0000      0.0000
         3        -0.0897     -0.0073      0.0000      0.0969      0.0646

 Excitation energies and oscillator strengths:
 
 Excited State   1:  2.032-A      1.7880 eV  693.42 nm  f=0.0294  <S**2>=0.782
     72A -> 73A        0.97771
     69B -> 72B        0.10730
     71B -> 72B        0.13770
 This state for optimization and/or second-order correction.
 Total Energy, E(TD-HF/TD-KS) =  -3263.05278499    
 Copying the excited state density for this state as the 1-particle RhoCI density.
 
 Excited State   2:  2.321-A      2.4072 eV  515.06 nm  f=0.0000  <S**2>=1.097
     70A -> 73A       -0.12393
     70B -> 72B        0.94008
     70B -> 73B        0.28580
     70B -> 79B       -0.11673
 
 Excited State   3:  2.258-A      2.8324 eV  437.74 nm  f=0.0637  <S**2>=1.024
     71A -> 73A       -0.15652
     72A -> 74A        0.51874
     68B -> 72B       -0.24282
     68B -> 73B        0.12840
     69B -> 72B       -0.20510
     71B -> 72B        0.71367
 SavETr:  write IOETrn=   770 NScale= 10 NData=  16 NLR=1 NState=    3 LETran=      62.
 The state does not have a specific multiplicity.
 CISAX will form     1 AO SS matrices at one time.
 NMat=     1 NSing=     1 JSym2X= 0.
 GePol: Maximum number of non-zero 1st derivatives   =     349
 CISAX will form     1 AO SS matrices at one time.
 NMat=     1 NSing=     1 JSym2X= 0.
 Leave Link  914 at Fri Jan 10 21:50:59 2020, MaxMem=   134217728 cpu:      4103.0
 (Enter E:\Gaussian\G09W\l1002.exe)
 Minotr:  UHF open shell wavefunction.
          Computing CIS/TD-HF/TD-KS derivatives.
          Using Z-Vector for PSCF gradient.
          Skipping F1 and S1 gradient terms here.
          IDoAtm=1111111111111111111111111
 NEqPCM:  Using equilibrium solvation (IEInf=0, Eps=  35.6880, EpsInf=   1.8069)
          Frozen-core window.
          Direct CPHF calculation.
          Differentiating once with respect to electric field.
                with respect to dipole field.
          Differentiating once with respect to nuclear coordinates.
          Requested convergence is 1.0D-10 RMS, and 1.0D-09 maximum.
          NewPWx=F KeepS1=T KeepF1=T KeepIn=T MapXYZ=F SortEE=F KeepMc=T.
          MDV=     134217222 using IRadAn=       0.
 Using stored XC quadrature information.
          Solving linear equations separately, MaxMat=       0.
          There are     1 degrees of freedom in the 1st order CPHF.  IDoFFX=0 NUNeed=     1.
 FoFJK:  IHMeth= 1 ICntrl=       0 DoSepK=F KAlg= 0 I1Cent=   0 FoldK=F
 IRaf= 800000000 NMat=   1 IRICut=       1 DoRegI=T DoRafI=F ISym2E=-1.
 FoFCou: FMM=F IPFlag=           0 FMFlag=      100000 FMFlg1=           0
         NFxFlg=           0 DoJE=F BraDBF=F KetDBF=F FulRan=T
         wScrn=  0.000000 ICntrl=       0 IOpCl=  1 I1Cent=           0 NGrid=           0
         NMat0=    1 NMatS0=      1 NMatT0=    0 NMatD0=    1 NMtDS0=    0 NMtDT0=    0
 Petite list used in FoFCou.
 LinEq1:  Iter=  0 NonCon=     1 RMS=2.67D-03 Max=2.34D-01 NDo=     1
 AX will form     1 AO Fock derivatives at one time.
 LinEq1:  Iter=  1 NonCon=     1 RMS=1.91D-03 Max=1.60D-01 NDo=     1
 LinEq1:  Iter=  2 NonCon=     1 RMS=9.71D-04 Max=5.00D-02 NDo=     1
 LinEq1:  Iter=  3 NonCon=     1 RMS=7.48D-04 Max=3.96D-02 NDo=     1
 LinEq1:  Iter=  4 NonCon=     1 RMS=5.93D-04 Max=3.00D-02 NDo=     1
 LinEq1:  Iter=  5 NonCon=     1 RMS=3.87D-04 Max=2.15D-02 NDo=     1
 LinEq1:  Iter=  6 NonCon=     1 RMS=3.24D-04 Max=1.51D-02 NDo=     1
 LinEq1:  Iter=  7 NonCon=     1 RMS=2.00D-04 Max=1.20D-02 NDo=     1
 LinEq1:  Iter=  8 NonCon=     1 RMS=1.59D-04 Max=1.28D-02 NDo=     1
 LinEq1:  Iter=  9 NonCon=     1 RMS=8.07D-05 Max=3.78D-03 NDo=     1
 LinEq1:  Iter= 10 NonCon=     1 RMS=5.25D-05 Max=2.77D-03 NDo=     1
 LinEq1:  Iter= 11 NonCon=     1 RMS=3.11D-05 Max=1.10D-03 NDo=     1
 LinEq1:  Iter= 12 NonCon=     1 RMS=1.72D-05 Max=8.49D-04 NDo=     1
 LinEq1:  Iter= 13 NonCon=     1 RMS=1.15D-05 Max=5.21D-04 NDo=     1
 LinEq1:  Iter= 14 NonCon=     1 RMS=7.61D-06 Max=3.95D-04 NDo=     1
 LinEq1:  Iter= 15 NonCon=     1 RMS=4.59D-06 Max=2.50D-04 NDo=     1
 LinEq1:  Iter= 16 NonCon=     1 RMS=2.67D-06 Max=1.26D-04 NDo=     1
 LinEq1:  Iter= 17 NonCon=     1 RMS=2.01D-06 Max=8.48D-05 NDo=     1
 LinEq1:  Iter= 18 NonCon=     1 RMS=8.39D-07 Max=3.43D-05 NDo=     1
 LinEq1:  Iter= 19 NonCon=     1 RMS=5.21D-07 Max=1.93D-05 NDo=     1
 LinEq1:  Iter= 20 NonCon=     1 RMS=2.82D-07 Max=1.08D-05 NDo=     1
 LinEq1:  Iter= 21 NonCon=     1 RMS=1.77D-07 Max=6.84D-06 NDo=     1
 LinEq1:  Iter= 22 NonCon=     1 RMS=1.07D-07 Max=4.60D-06 NDo=     1
 LinEq1:  Iter= 23 NonCon=     1 RMS=4.70D-08 Max=2.20D-06 NDo=     1
 LinEq1:  Iter= 24 NonCon=     1 RMS=3.47D-08 Max=1.20D-06 NDo=     1
 LinEq1:  Iter= 25 NonCon=     1 RMS=1.47D-08 Max=8.37D-07 NDo=     1
 LinEq1:  Iter= 26 NonCon=     1 RMS=9.72D-09 Max=3.29D-07 NDo=     1
 LinEq1:  Iter= 27 NonCon=     1 RMS=5.68D-09 Max=1.87D-07 NDo=     1
 LinEq1:  Iter= 28 NonCon=     1 RMS=2.91D-09 Max=9.95D-08 NDo=     1
 LinEq1:  Iter= 29 NonCon=     1 RMS=1.88D-09 Max=5.07D-08 NDo=     1
 LinEq1:  Iter= 30 NonCon=     1 RMS=6.86D-10 Max=1.83D-08 NDo=     1
 LinEq1:  Iter= 31 NonCon=     1 RMS=2.63D-10 Max=1.13D-08 NDo=     1
 LinEq1:  Iter= 32 NonCon=     1 RMS=1.82D-10 Max=8.72D-09 NDo=     1
 LinEq1:  Iter= 33 NonCon=     1 RMS=6.11D-11 Max=1.46D-09 NDo=     1
 LinEq1:  Iter= 34 NonCon=     0 RMS=2.10D-11 Max=4.95D-10 NDo=     1
 Linear equations converged to 1.000D-10 1.000D-09 after    34 iterations.
 End of Minotr F.D. properties file   721 does not exist.
 End of Minotr F.D. properties file   722 does not exist.
 End of Minotr F.D. properties file   788 does not exist.
 Leave Link 1002 at Fri Jan 10 22:47:18 2020, MaxMem=   134217728 cpu:      3378.0
 (Enter E:\Gaussian\G09W\l701.exe)
 Compute integral first derivatives.
 ... and contract with generalized density number  6.
 R6Disp: Adding Grimme-D3(BJ) dispersion energy 1st derivatives to the gradient.
 D1PCM: PCM CHGder 1st derivatives, ID1Alg=3 FixD1E=F DoIter=F DoCFld=F I1PDM=6.
 Leave Link  701 at Fri Jan 10 22:48:07 2020, MaxMem=   134217728 cpu:        48.0
 (Enter E:\Gaussian\G09W\l702.exe)
 L702 exits ... SP integral derivatives will be done elsewhere.
 Leave Link  702 at Fri Jan 10 22:48:07 2020, MaxMem=   134217728 cpu:         0.0
 (Enter E:\Gaussian\G09W\l703.exe)
 Compute integral first derivatives, UseDBF=F ICtDFT=           0.
 Integral derivatives from FoFJK, PRISM(SPDF).
 Calling FoFJK, ICntrl=  10005127 FMM=F ISym2X=0 I1Cent= 0 IOpClX= 1 NMat=1 NMatS=1 NMatT=0.
 FoFJK:  IHMeth= 1 ICntrl=10005127 DoSepK=F KAlg= 0 I1Cent=   0 FoldK=F
 IRaf=         0 NMat=   1 IRICut=       1 DoRegI=T DoRafI=F ISym2E= 0.
 FoFCou: FMM=F IPFlag=           0 FMFlag=      100000 FMFlg1=         800
         NFxFlg=           0 DoJE=F BraDBF=F KetDBF=F FulRan=T
         wScrn=  0.000000 ICntrl=10005127 IOpCl=  1 I1Cent=           0 NGrid=           0
         NMat0=    1 NMatS0=      1 NMatT0=    0 NMatD0=    1 NMtDS0=    0 NMtDT0=    0
 Symmetry not used in FoFCou.
 Leave Link  703 at Fri Jan 10 22:52:25 2020, MaxMem=   134217728 cpu:       257.0
 (Enter E:\Gaussian\G09W\l716.exe)
 Dipole        =-1.36556939D+00-3.22493945D+00-2.90740808D-06
 ***** Axes restored to original set *****
 -------------------------------------------------------------------
 Center     Atomic                   Forces (Hartrees/Bohr)
 Number     Number              X              Y              Z
 -------------------------------------------------------------------
      1        6          -0.000027247    0.000021670    0.000000020
      2        6           0.000036006   -0.000051195    0.000000003
      3        6          -0.000033844   -0.000072905   -0.000001668
      4        6           0.000144338   -0.000044058   -0.000000487
      5        6          -0.000100217    0.000024482    0.000000117
      6        6           0.000059234   -0.000052126   -0.000000060
      7        1           0.000013865   -0.000005128    0.000000001
      8        1          -0.000003138    0.000019252    0.000000103
      9        1           0.000048266   -0.000020444    0.000000202
     10        1           0.000017640   -0.000005948   -0.000000042
     11        6          -0.000037867    0.000159570    0.000000774
     12        6           0.000014719    0.000140068    0.000005932
     13        6          -0.000084303   -0.000068886   -0.000000688
     14        6           0.000021485    0.000030147   -0.000001622
     15        6           0.000008036    0.000049575    0.000000164
     16        6          -0.000064129   -0.000048025    0.000000076
     17        6           0.000037301    0.000021936   -0.000000075
     18        1           0.000006696    0.000010678    0.000000177
     19        6           0.000043474   -0.000014439   -0.000000064
     20        1          -0.000003774    0.000030982    0.000000106
     21        1          -0.000020952    0.000005716    0.000000025
     22       35          -0.000009192    0.000009897   -0.000000013
     23        8           0.000007920   -0.000063862   -0.000002509
     24        8          -0.000051541   -0.000053529   -0.000000327
     25        1          -0.000022774   -0.000023427   -0.000000144
 -------------------------------------------------------------------
 Cartesian Forces:  Max     0.000159570 RMS     0.000043260
 Leave Link  716 at Fri Jan 10 22:52:25 2020, MaxMem=   134217728 cpu:         0.0
 (Enter E:\Gaussian\G09W\l103.exe)

 GradGradGradGradGradGradGradGradGradGradGradGradGradGradGradGradGradGrad
 Berny optimization.
 Using GEDIIS/GDIIS optimizer.
 FormGI is forming the generalized inverse of G from B-inverse, IUseBI=4.
 Internal  Forces:  Max     0.000173687 RMS     0.000027931
 Search for a local minimum.
 Step number   5 out of a maximum of  146
 All quantities printed in internal units (Hartrees-Bohrs-Radians)
 RMS Force = .27931D-04 SwitMx=.10000D-02 MixMth= 2
 Mixed Optimization -- En-DIIS/RFO-DIIS
 Swapping is turned off.
 Update second derivatives using D2CorX and points    1    2    3    4    5
 DE= -2.39D-06 DEPred=-2.01D-06 R= 1.18D+00
 TightC=F SS=  1.41D+00  RLast= 4.99D-03 DXNew= 6.8268D-01 1.4969D-02
 Trust test= 1.18D+00 RLast= 4.99D-03 DXMaxT set to 4.06D-01
 ITU=  1  1  1  1  0
     Eigenvalues ---    0.01152   0.01345   0.01638   0.01707   0.01732
     Eigenvalues ---    0.01777   0.01839   0.01859   0.01881   0.02057
     Eigenvalues ---    0.02084   0.02104   0.02116   0.02147   0.02168
     Eigenvalues ---    0.02184   0.02196   0.02206   0.02218   0.02247
     Eigenvalues ---    0.02270   0.02389   0.11382   0.15990   0.16000
     Eigenvalues ---    0.16000   0.16000   0.16007   0.16193   0.16266
     Eigenvalues ---    0.17650   0.20008   0.22095   0.22396   0.22694
     Eigenvalues ---    0.23565   0.24544   0.24809   0.24996   0.25000
     Eigenvalues ---    0.25262   0.25829   0.28463   0.32396   0.34692
     Eigenvalues ---    0.35423   0.35508   0.35556   0.35646   0.35705
     Eigenvalues ---    0.35768   0.35970   0.36689   0.37949   0.39467
     Eigenvalues ---    0.40910   0.41177   0.42331   0.43276   0.43881
     Eigenvalues ---    0.44488   0.45963   0.47566   0.48191   0.48688
     Eigenvalues ---    0.50517   0.54368   0.54846   0.86566
 En-DIIS/RFO-DIIS IScMMF=        0 using points:     5    4    3
 RFO step:  Lambda=-1.81839750D-07.
 NNeg= 0 NP= 3 Switch=  2.50D-03 Rises=F DC=  2.09D-05 SmlDif=  1.00D-05
 RMS Error=  0.4879614818D-04 NUsed= 3 EDIIS=F
 DidBck=F Rises=F RFO-DIIS coefs:    0.93341    0.09430   -0.02771
 Iteration  1 RMS(Cart)=  0.00023987 RMS(Int)=  0.00000003
 Iteration  2 RMS(Cart)=  0.00000004 RMS(Int)=  0.00000001
 ITry= 1 IFail=0 DXMaxC= 1.82D-03 DCOld= 1.00D+10 DXMaxT= 4.06D-01 DXLimC= 3.00D+00 Rises=F
 Variable       Old X    -DE/DX   Delta X   Delta X   Delta X     New X
                                 (Linear)    (Quad)   (Total)
    R1        2.66029   0.00000   0.00001  -0.00003  -0.00001   2.66028
    R2        2.61311   0.00003   0.00001   0.00008   0.00009   2.61320
    R3        2.04985  -0.00001   0.00002  -0.00006  -0.00004   2.04981
    R4        2.63309  -0.00004   0.00002  -0.00012  -0.00010   2.63299
    R5        2.04411   0.00002  -0.00002   0.00009   0.00007   2.04418
    R6        2.69233  -0.00004   0.00003  -0.00011  -0.00008   2.69225
    R7        2.77854   0.00004   0.00001   0.00011   0.00011   2.77866
    R8        2.64348   0.00000  -0.00006   0.00009   0.00003   2.64351
    R9        2.72273  -0.00017   0.00001  -0.00041  -0.00040   2.72233
   R10        2.66035  -0.00006   0.00004  -0.00020  -0.00016   2.66019
   R11        2.05054   0.00002  -0.00001   0.00007   0.00006   2.05060
   R12        2.04607  -0.00001   0.00000  -0.00003  -0.00002   2.04604
   R13        2.72611  -0.00003   0.00010  -0.00021  -0.00012   2.72600
   R14        2.47982   0.00005  -0.00004   0.00018   0.00014   2.47996
   R15        2.76244  -0.00001  -0.00001  -0.00001  -0.00002   2.76241
   R16        2.37119  -0.00006   0.00002  -0.00012  -0.00010   2.37109
   R17        2.68432   0.00003   0.00003   0.00006   0.00009   2.68441
   R18        2.63736   0.00002   0.00001   0.00003   0.00004   2.63740
   R19        2.64213  -0.00004   0.00001  -0.00011  -0.00010   2.64203
   R20        2.66631   0.00001   0.00004  -0.00002   0.00002   2.66633
   R21        2.04119   0.00000  -0.00002   0.00001   0.00000   2.04119
   R22        2.65876   0.00003   0.00001   0.00002   0.00003   2.65880
   R23        2.04341   0.00003  -0.00001   0.00009   0.00007   2.04348
   R24        2.60682  -0.00002   0.00001  -0.00006  -0.00005   2.60678
   R25        3.61928  -0.00001   0.00006  -0.00015  -0.00008   3.61919
   R26        2.04738  -0.00001   0.00001  -0.00005  -0.00004   2.04734
   R27        1.82974   0.00004  -0.00001   0.00007   0.00006   1.82979
    A1        2.11081  -0.00001   0.00001  -0.00007  -0.00007   2.11074
    A2        2.08130   0.00000  -0.00001  -0.00003  -0.00005   2.08126
    A3        2.09107   0.00001   0.00001   0.00011   0.00011   2.09119
    A4        2.10513   0.00001  -0.00002   0.00012   0.00010   2.10522
    A5        2.11043   0.00000   0.00000  -0.00006  -0.00006   2.11037
    A6        2.06763  -0.00001   0.00003  -0.00006  -0.00004   2.06759
    A7        2.07026  -0.00001  -0.00001  -0.00005  -0.00006   2.07021
    A8        2.09972   0.00000   0.00002  -0.00002   0.00001   2.09972
    A9        2.11321   0.00001  -0.00002   0.00007   0.00005   2.11326
   A10        2.09616   0.00002   0.00004  -0.00004   0.00000   2.09616
   A11        2.05492   0.00003   0.00001   0.00011   0.00012   2.05504
   A12        2.13210  -0.00004  -0.00005  -0.00007  -0.00012   2.13198
   A13        2.10342   0.00001  -0.00004   0.00009   0.00006   2.10348
   A14        2.12862  -0.00004  -0.00001  -0.00020  -0.00020   2.12842
   A15        2.05114   0.00004   0.00004   0.00011   0.00015   2.05129
   A16        2.08059  -0.00001   0.00002  -0.00005  -0.00003   2.08056
   A17        2.11185   0.00001  -0.00001   0.00011   0.00010   2.11195
   A18        2.09075   0.00000  -0.00002  -0.00005  -0.00007   2.09068
   A19        2.15195   0.00002   0.00000  -0.00004  -0.00004   2.15191
   A20        2.12637  -0.00014  -0.00008  -0.00031  -0.00039   2.12598
   A21        2.00487   0.00012   0.00008   0.00035   0.00043   2.00530
   A22        2.07209  -0.00005   0.00004  -0.00023  -0.00020   2.07190
   A23        2.10240   0.00002   0.00000   0.00008   0.00008   2.10248
   A24        2.10869   0.00003  -0.00004   0.00015   0.00011   2.10881
   A25        2.06598   0.00000  -0.00002   0.00006   0.00004   2.06601
   A26        2.10204   0.00004   0.00002   0.00011   0.00013   2.10217
   A27        2.11517  -0.00004   0.00000  -0.00017  -0.00017   2.11500
   A28        2.10822   0.00000  -0.00001   0.00004   0.00003   2.10825
   A29        2.10977  -0.00001  -0.00001  -0.00002  -0.00003   2.10974
   A30        2.06520   0.00001   0.00001  -0.00001   0.00000   2.06520
   A31        2.07360   0.00003  -0.00001   0.00018   0.00017   2.07377
   A32        2.10234  -0.00001   0.00001  -0.00001   0.00000   2.10234
   A33        2.10725  -0.00002  -0.00001  -0.00016  -0.00017   2.10708
   A34        2.10842   0.00002  -0.00002   0.00015   0.00013   2.10855
   A35        2.07511   0.00000   0.00001   0.00002   0.00004   2.07514
   A36        2.09966  -0.00002   0.00001  -0.00017  -0.00017   2.09949
   A37        2.11080  -0.00001  -0.00001  -0.00006  -0.00006   2.11073
   A38        2.07273   0.00000   0.00000  -0.00003  -0.00003   2.07270
   A39        2.09966   0.00001   0.00001   0.00009   0.00010   2.09975
   A40        2.09320   0.00000   0.00002  -0.00009  -0.00007   2.09313
   A41        2.08935  -0.00001  -0.00002  -0.00005  -0.00007   2.08929
   A42        2.10064   0.00001   0.00000   0.00014   0.00013   2.10077
   A43        1.97744   0.00000  -0.00007   0.00007   0.00000   1.97744
    D1        0.00000   0.00000   0.00000   0.00000   0.00000   0.00000
    D2        3.14159   0.00000   0.00000   0.00001   0.00001  -3.14159
    D3       -3.14159   0.00000   0.00000   0.00000   0.00000   3.14159
    D4        0.00000   0.00000   0.00000   0.00000   0.00000   0.00000
    D5        0.00000   0.00000   0.00000   0.00000   0.00000   0.00000
    D6       -3.14159   0.00000   0.00000   0.00000   0.00000  -3.14159
    D7       -3.14159   0.00000   0.00000   0.00000   0.00000  -3.14159
    D8        0.00000   0.00000   0.00000   0.00000   0.00000   0.00000
    D9        0.00000   0.00000   0.00000   0.00000   0.00000   0.00000
   D10        3.14158   0.00000   0.00000   0.00001   0.00001  -3.14159
   D11        3.14159   0.00000   0.00000   0.00000   0.00000   3.14159
   D12       -0.00001   0.00000   0.00000   0.00001   0.00001   0.00000
   D13        0.00001   0.00000   0.00000  -0.00001  -0.00001   0.00000
[truncated: 134,203 more chars]
