# Supplementary material for: 2-Bromoanthraquinone as a highly efficient photocatalyst for the oxidation of sec-aromatic alcohols: experimental and DFT study
Source: Royal Society of Chemistry journal article supplement (doi:10.1039/d0ra06414a), 2020-01-01
Supplement: d0ra06414a10.out [file d0ra06414a10.out]

 Entering Link 1 = E:\Gaussian\G09W\l1.exe PID=     74324.
  
 Copyright (c) 1988,1990,1992,1993,1995,1998,2003,2009,2013,
            Gaussian, Inc.  All Rights Reserved.
  
 This is part of the Gaussian(R) 09 program.  It is based on
 the Gaussian(R) 03 system (copyright 2003, Gaussian, Inc.),
 the Gaussian(R) 98 system (copyright 1998, Gaussian, Inc.),
 the Gaussian(R) 94 system (copyright 1995, Gaussian, Inc.),
 the Gaussian 92(TM) system (copyright 1992, Gaussian, Inc.),
 the Gaussian 90(TM) system (copyright 1990, Gaussian, Inc.),
 the Gaussian 88(TM) system (copyright 1988, Gaussian, Inc.),
 the Gaussian 86(TM) system (copyright 1986, Carnegie Mellon
 University), and the Gaussian 82(TM) system (copyright 1983,
 Carnegie Mellon University). Gaussian is a federally registered
 trademark of Gaussian, Inc.
  
 This software contains proprietary and confidential information,
 including trade secrets, belonging to Gaussian, Inc.
  
 This software is provided under written license and may be
 used, copied, transmitted, or stored only in accord with that
 written license.
  
 The following legend is applicable only to US Government
 contracts under FAR:
  
                    RESTRICTED RIGHTS LEGEND
  
 Use, reproduction and disclosure by the US Government is
 subject to restrictions as set forth in subparagraphs (a)
 and (c) of the Commercial Computer Software - Restricted
 Rights clause in FAR 52.227-19.
  
 Gaussian, Inc.
 340 Quinnipiac St., Bldg. 40, Wallingford CT 06492
  
  
 ---------------------------------------------------------------
 Warning -- This program may not be used in any manner that
 competes with the business of Gaussian, Inc. or will provide
 assistance to any competitor of Gaussian, Inc.  The licensee
 of this program is prohibited from giving any competitor of
 Gaussian, Inc. access to this program.  By using this program,
 the user acknowledges that Gaussian, Inc. is engaged in the
 business of creating and licensing software in the field of
 computational chemistry and represents and warrants to the
 licensee that it is not a competitor of Gaussian, Inc. and that
 it will not use this program in any manner prohibited above.
 ---------------------------------------------------------------
  

 Cite this work as:
 Gaussian 09, Revision D.01,
 M. J. Frisch, G. W. Trucks, H. B. Schlegel, G. E. Scuseria, 
 M. A. Robb, J. R. Cheeseman, G. Scalmani, V. Barone, B. Mennucci, 
 G. A. Petersson, H. Nakatsuji, M. Caricato, X. Li, H. P. Hratchian, 
 A. F. Izmaylov, J. Bloino, G. Zheng, J. L. Sonnenberg, M. Hada, 
 M. Ehara, K. Toyota, R. Fukuda, J. Hasegawa, M. Ishida, T. Nakajima, 
 Y. Honda, O. Kitao, H. Nakai, T. Vreven, J. A. Montgomery, Jr., 
 J. E. Peralta, F. Ogliaro, M. Bearpark, J. J. Heyd, E. Brothers, 
 K. N. Kudin, V. N. Staroverov, T. Keith, R. Kobayashi, J. Normand, 
 K. Raghavachari, A. Rendell, J. C. Burant, S. S. Iyengar, J. Tomasi, 
 M. Cossi, N. Rega, J. M. Millam, M. Klene, J. E. Knox, J. B. Cross, 
 V. Bakken, C. Adamo, J. Jaramillo, R. Gomperts, R. E. Stratmann, 
 O. Yazyev, A. J. Austin, R. Cammi, C. Pomelli, J. W. Ochterski, 
 R. L. Martin, K. Morokuma, V. G. Zakrzewski, G. A. Voth, 
 P. Salvador, J. J. Dannenberg, S. Dapprich, A. D. Daniels, 
 O. Farkas, J. B. Foresman, J. V. Ortiz, J. Cioslowski, 
 and D. J. Fox, Gaussian, Inc., Wallingford CT, 2013.
 
 ******************************************
 Gaussian 09:  IA32W-G09RevD.01 24-Apr-2013
                09-Jan-2020 
 ******************************************
 %mem=1GB
 %chk=E:\Gaussian file\2-BrAQ ground state energy.chk
 ----------------------------------------------------------------------
 #p m062x/gen scrf=(solvent=acetonitrile) guess=save geom=connectivity 
 empiricaldispersion=gd3
 ----------------------------------------------------------------------
 1/38=1,57=2/1;
 2/12=2,17=6,18=5,40=1/2;
 3/5=7,11=2,16=1,25=1,30=1,70=2201,72=2,74=-55,124=31/1,2,3;
 4//1;
 5/5=2,38=5,53=2/2;
 6/7=2,8=2,9=2,10=2,28=1/1;
 99/5=1,9=1/99;
 Leave Link    1 at Thu Jan 09 15:40:43 2020, MaxMem=   134217728 cpu:         0.0
 (Enter E:\Gaussian\G09W\l101.exe)
 --------------------------
 2-BrAQ ground state energy
 --------------------------
 Symbolic Z-matrix:
 Charge =  0 Multiplicity = 1
 C                    -1.60256   0.89744   0. 
 C                    -0.5673    1.82558  -0.00003 
 C                     0.76275   1.39822  -0.00014 
 C                     1.05066   0.02032  -0.00017 
 C                     0.00366  -0.90497  -0.00016 
 C                    -1.3167   -0.46987  -0.00007 
 H                    -2.63214   1.23652   0.00007 
 H                    -0.77526   2.88811  -0.00001 
 H                     0.23886  -1.9618   -0.00019 
 H                    -2.12407  -1.19313  -0.00005 
 C                     2.45109  -0.47419  -0.00016 
 O                     2.7083   -1.67006  -0.00042 
 C                     1.84868   2.41338  -0.0003 
 C                     3.53917   0.54473  -0.00012 
 C                     3.25091   1.91972  -0.0001 
 C                     4.86466   0.10675  -0.00006 
 C                     4.30049   2.84201   0.00006 
 C                     5.88772   1.04408   0.00007 
 H                     5.0716   -0.95487  -0.00009 
 C                     5.62138   2.41395   0.00015 
 H                     4.07169   3.90014   0.00009 
 H                     6.43149   3.13189   0.00026 
 Br                    7.70342   0.44632   0.00019 
 O                     1.6011    3.61225   0.00026 
 
 NAtoms=     24 NQM=       24 NQMF=       0 NMMI=      0 NMMIF=      0
                NMic=       0 NMicF=      0.
                    Isotopes and Nuclear Properties:
 (Nuclear quadrupole moments (NQMom) in fm**2, nuclear magnetic moments (NMagM)
  in nuclear magnetons)

  Atom         1           2           3           4           5           6           7           8           9          10
 IAtWgt=          12          12          12          12          12          12           1           1           1           1
 AtmWgt=  12.0000000  12.0000000  12.0000000  12.0000000  12.0000000  12.0000000   1.0078250   1.0078250   1.0078250   1.0078250
 NucSpn=           0           0           0           0           0           0           1           1           1           1
 AtZEff=   0.0000000   0.0000000   0.0000000   0.0000000   0.0000000   0.0000000   0.0000000   0.0000000   0.0000000   0.0000000
 NQMom=    0.0000000   0.0000000   0.0000000   0.0000000   0.0000000   0.0000000   0.0000000   0.0000000   0.0000000   0.0000000
 NMagM=    0.0000000   0.0000000   0.0000000   0.0000000   0.0000000   0.0000000   2.7928460   2.7928460   2.7928460   2.7928460
 AtZNuc=   6.0000000   6.0000000   6.0000000   6.0000000   6.0000000   6.0000000   1.0000000   1.0000000   1.0000000   1.0000000

  Atom        11          12          13          14          15          16          17          18          19          20
 IAtWgt=          12          16          12          12          12          12          12          12           1          12
 AtmWgt=  12.0000000  15.9949146  12.0000000  12.0000000  12.0000000  12.0000000  12.0000000  12.0000000   1.0078250  12.0000000
 NucSpn=           0           0           0           0           0           0           0           0           1           0
 AtZEff=   0.0000000   0.0000000   0.0000000   0.0000000   0.0000000   0.0000000   0.0000000   0.0000000   0.0000000   0.0000000
 NQMom=    0.0000000   0.0000000   0.0000000   0.0000000   0.0000000   0.0000000   0.0000000   0.0000000   0.0000000   0.0000000
 NMagM=    0.0000000   0.0000000   0.0000000   0.0000000   0.0000000   0.0000000   0.0000000   0.0000000   2.7928460   0.0000000
 AtZNuc=   6.0000000   8.0000000   6.0000000   6.0000000   6.0000000   6.0000000   6.0000000   6.0000000   1.0000000   6.0000000

  Atom        21          22          23          24
 IAtWgt=           1           1          79          16
 AtmWgt=   1.0078250   1.0078250  78.9183361  15.9949146
 NucSpn=           1           1           3           0
 AtZEff=   0.0000000   0.0000000   0.0000000   0.0000000
 NQMom=    0.0000000   0.0000000  31.3000000   0.0000000
 NMagM=    2.7928460   2.7928460   2.1063990   0.0000000
 AtZNuc=   1.0000000   1.0000000  35.0000000   8.0000000
 Leave Link  101 at Thu Jan 09 15:40:44 2020, MaxMem=   134217728 cpu:         0.0
 (Enter E:\Gaussian\G09W\l202.exe)
                          Input orientation:                          
 ---------------------------------------------------------------------
 Center     Atomic      Atomic             Coordinates (Angstroms)
 Number     Number       Type             X           Y           Z
 ---------------------------------------------------------------------
      1          6           0       -1.602564    0.897436    0.000000
      2          6           0       -0.567296    1.825583   -0.000034
      3          6           0        0.762755    1.398219   -0.000144
      4          6           0        1.050658    0.020325   -0.000174
      5          6           0        0.003659   -0.904966   -0.000160
      6          6           0       -1.316704   -0.469869   -0.000072
      7          1           0       -2.632141    1.236522    0.000074
      8          1           0       -0.775263    2.888115   -0.000006
      9          1           0        0.238862   -1.961798   -0.000192
     10          1           0       -2.124066   -1.193129   -0.000049
     11          6           0        2.451090   -0.474194   -0.000159
     12          8           0        2.708304   -1.670058   -0.000417
     13          6           0        1.848683    2.413384   -0.000300
     14          6           0        3.539167    0.544728   -0.000122
     15          6           0        3.250915    1.919718   -0.000095
     16          6           0        4.864659    0.106752   -0.000057
     17          6           0        4.300493    2.842011    0.000060
     18          6           0        5.887724    1.044084    0.000074
     19          1           0        5.071601   -0.954872   -0.000086
     20          6           0        5.621378    2.413954    0.000145
     21          1           0        4.071692    3.900143    0.000085
     22          1           0        6.431486    3.131890    0.000255
     23         35           0        7.703424    0.446322    0.000187
     24          8           0        1.601104    3.612250    0.000261
 ---------------------------------------------------------------------
                    Distance matrix (angstroms):
                    1          2          3          4          5
     1  C    0.000000
     2  C    1.390409   0.000000
     3  C    2.417751   1.397024   0.000000
     4  C    2.794443   2.424197   1.407651   0.000000
     5  C    2.414250   2.789603   2.425054   1.397272   0.000000
     6  C    1.396868   2.414687   2.795336   2.417580   1.390204
     7  H    1.083978   2.147226   3.398745   3.878420   3.396088
     8  H    2.155743   1.082693   2.141329   3.399736   3.872232
     9  H    3.400892   3.872227   3.400614   2.141921   1.082688
    10  H    2.154629   3.396492   3.879281   3.398727   2.147150
    11  C    4.279425   3.794684   2.521191   1.485180   2.485052
    12  O    5.017530   4.790518   3.633110   2.367527   2.810778
    13  C    3.769510   2.486456   1.486539   2.522613   3.796783
    14  C    5.153814   4.301584   2.904636   2.543163   3.821182
    15  C    4.959972   3.819371   2.542224   2.906686   4.303895
    16  C    6.515378   5.697413   4.300407   3.814980   4.965168
    17  C    6.215099   4.972775   3.821011   4.303875   5.701107
    18  C    7.491723   6.502155   5.137190   4.944218   6.198469
    19  H    6.926437   6.287137   4.909500   4.137510   5.068188
    20  C    7.381407   6.216580   4.963661   5.159549   6.524875
    21  H    6.419769   5.081733   4.148336   4.917279   6.295869
    22  H    8.338989   7.119648   5.927911   6.215718   7.590334
    23  Br   9.316916   8.384937   7.005640   6.666391   7.817440
    24  O    4.199250   2.809651   2.367438   3.633857   4.791354
                    6          7          8          9         10
     6  C    0.000000
     7  H    2.154564   0.000000
     8  H    3.401355   2.485107   0.000000
     9  H    2.155374   4.297896   4.954806   0.000000
    10  H    1.083946   2.482206   4.298351   2.484810   0.000000
    11  C    3.767796   5.363375   4.659879   2.665880   4.631298
    12  O    4.200136   6.080178   5.736914   2.486615   4.855848
    13  C    4.281685   4.632795   2.666545   4.661946   5.365601
    14  C    4.960735   6.209961   4.909763   4.144235   5.923880
    15  C    5.154927   5.922593   4.141003   4.913108   6.211299
    16  C    6.208199   7.581450   6.288458   5.067238   7.108584
    17  C    6.520847   7.116109   5.075965   6.290741   7.586654
    18  C    7.361782   8.522038   6.913454   6.398826   8.318287
    19  H    6.406689   8.009360   6.996740   4.936524   7.199610
    20  C    7.513549   8.337081   6.414191   6.936763   8.544176
    21  H    6.937710   7.213616   4.951482   7.003780   8.020526
    22  H    8.544420   9.259684   7.210871   8.018370   9.586619
    23  Br   9.066538  10.365728   8.823292   7.843388   9.963301
    24  O    5.017699   4.854322   2.484249   5.738093   6.080178
                   11         12         13         14         15
    11  C    0.000000
    12  O    1.223213   0.000000
    13  C    2.949746   4.172942   0.000000
    14  C    1.490676   2.365504   2.519844   0.000000
    15  C    2.523992   3.630553   1.486594   1.404880   0.000000
    16  C    2.482501   2.794087   3.796928   1.395977   2.427141
    17  C    3.797039   4.784750   2.488994   2.420150   1.397225
    18  C    3.757076   4.180344   4.264837   2.401057   2.778398
    19  H    2.664231   2.469142   4.661797   2.144098   3.402670
    20  C    4.288604   5.016488   3.772695   2.798144   2.421438
    21  H    4.664887   5.734629   2.674364   3.397410   2.143772
    22  H    5.370977   6.076248   4.638786   3.880582   3.403732
    23  Br   5.332388   5.424969   6.176352   4.165420   4.689961
    24  O    4.173907   5.397098   1.224163   3.628468   2.363586
                   16         17         18         19         20
    16  C    0.000000
    17  C    2.792835   0.000000
    18  C    1.387535   2.398300   0.000000
    19  H    1.081606   3.874394   2.159139   0.000000
    20  C    2.428128   1.388514   1.395523   3.413392   0.000000
    21  H    3.875385   1.082586   3.384530   4.956913   2.147157
    22  H    3.406818   2.150619   2.157455   4.307077   1.082454
    23  Br   2.859002   4.161642   1.911566   2.981583   2.864697
    24  O    4.789500   2.807128   4.997058   5.736110   4.195059
                   21         22         23         24
    21  H    0.000000
    22  H    2.481701   0.000000
    23  Br   5.011822   2.971549   0.000000
    24  O    2.487305   4.854208   6.874693   0.000000
 Stoichiometry    C14H7BrO2
 Framework group  C1[X(C14H7BrO2)]
 Deg. of freedom    66
 Full point group                 C1      NOp   1
 Largest Abelian subgroup         C1      NOp   1
 Largest concise Abelian subgroup C1      NOp   1
                         Standard orientation:                         
 ---------------------------------------------------------------------
 Center     Atomic      Atomic             Coordinates (Angstroms)
 Number     Number       Type             X           Y           Z
 ---------------------------------------------------------------------
      1          6           0        5.088092    0.054699   -0.000006
      2          6           0        4.052824    0.982846    0.000028
      3          6           0        2.722773    0.555482    0.000138
      4          6           0        2.434870   -0.822412    0.000168
      5          6           0        3.481869   -1.747703    0.000154
      6          6           0        4.802232   -1.312606    0.000066
      7          1           0        6.117669    0.393785   -0.000080
      8          1           0        4.260791    2.045378    0.000000
      9          1           0        3.246666   -2.804535    0.000186
     10          1           0        5.609594   -2.035866    0.000043
     11          6           0        1.034438   -1.316931    0.000153
     12          8           0        0.777224   -2.512795    0.000411
     13          6           0        1.636845    1.570647    0.000294
     14          6           0       -0.053639   -0.298009    0.000116
     15          6           0        0.234613    1.076981    0.000089
     16          6           0       -1.379131   -0.735985    0.000051
     17          6           0       -0.814965    1.999274   -0.000066
     18          6           0       -2.402196    0.201347   -0.000080
     19          1           0       -1.586073   -1.797609    0.000080
     20          6           0       -2.135850    1.571217   -0.000151
     21          1           0       -0.586164    3.057406   -0.000091
     22          1           0       -2.945958    2.289153   -0.000261
     23         35           0       -4.217896   -0.396415   -0.000193
     24          8           0        1.884424    2.769513   -0.000267
 ---------------------------------------------------------------------
 Rotational constants (GHZ):      1.0090757      0.1765797      0.1502817
 Leave Link  202 at Thu Jan 09 15:40:44 2020, MaxMem=   134217728 cpu:         0.0
 (Enter E:\Gaussian\G09W\l301.exe)
 General basis read from cards:  (5D, 7F)
 Centers:       7      8      9     10     19     21     22
 S 3 1.00
     Exponent=  3.4061341000D+01 Coefficients=  6.0251978000D-03
     Exponent=  5.1235746000D+00 Coefficients=  4.5021094000D-02
     Exponent=  1.1646626000D+00 Coefficients=  2.0189726000D-01
 S 1 1.00
     Exponent=  3.2723041000D-01 Coefficients=  1.0000000000D+00
 S 1 1.00
     Exponent=  1.0307241000D-01 Coefficients=  1.0000000000D+00
 P 1 1.00
     Exponent=  8.0000000000D-01 Coefficients=  1.0000000000D+00
 ****
 Centers:       1      2      3      4      5      6     11     13     14     15
 Centers:      16     17     18     20
 S 6 1.00
     Exponent=  1.3575349682D+04 Coefficients=  2.2245814352D-04
     Exponent=  2.0352333680D+03 Coefficients=  1.7232738252D-03
     Exponent=  4.6322562359D+02 Coefficients=  8.9255715314D-03
     Exponent=  1.3120019598D+02 Coefficients=  3.5727984502D-02
     Exponent=  4.2853015891D+01 Coefficients=  1.1076259931D-01
     Exponent=  1.5584185766D+01 Coefficients=  2.4295627626D-01
 S 2 1.00
     Exponent=  6.2067138508D+00 Coefficients=  4.1440263448D-01
     Exponent=  2.5764896527D+00 Coefficients=  2.3744968655D-01
 S 1 1.00
     Exponent=  5.7696339419D-01 Coefficients=  1.0000000000D+00
 S 1 1.00
     Exponent=  2.2972831358D-01 Coefficients=  1.0000000000D+00
 S 1 1.00
     Exponent=  9.5164440028D-02 Coefficients=  1.0000000000D+00
 P 4 1.00
     Exponent=  3.4697232244D+01 Coefficients=  5.3333657805D-03
     Exponent=  7.9582622826D+00 Coefficients=  3.5864109092D-02
     Exponent=  2.3780826883D+00 Coefficients=  1.4215873329D-01
     Exponent=  8.1433208183D-01 Coefficients=  3.4270471845D-01
 P 1 1.00
     Exponent=  2.8887547253D-01 Coefficients=  4.6445822433D-01
 P 1 1.00
     Exponent=  1.0056823671D-01 Coefficients=  2.4955789874D-01
 D 1 1.00
     Exponent=  1.0970000000D+00 Coefficients=  1.0000000000D+00
 D 1 1.00
     Exponent=  3.1800000000D-01 Coefficients=  1.0000000000D+00
 F 1 1.00
     Exponent=  7.6100000000D-01 Coefficients=  1.0000000000D+00
 ****
 Centers:      12     24
 S 6 1.00
     Exponent=  2.7032382631D+04 Coefficients=  2.1726302465D-04
     Exponent=  4.0523871392D+03 Coefficients=  1.6838662199D-03
     Exponent=  9.2232722710D+02 Coefficients=  8.7395616265D-03
     Exponent=  2.6124070989D+02 Coefficients=  3.5239968808D-02
     Exponent=  8.5354641351D+01 Coefficients=  1.1153519115D-01
     Exponent=  3.1035035245D+01 Coefficients=  2.5588953961D-01
 S 2 1.00
     Exponent=  1.2260860728D+01 Coefficients=  3.9768730901D-01
     Exponent=  4.9987076005D+00 Coefficients=  2.4627849430D-01
 S 1 1.00
     Exponent=  1.1703108158D+00 Coefficients=  1.0000000000D+00
 S 1 1.00
     Exponent=  4.6474740994D-01 Coefficients=  1.0000000000D+00
 S 1 1.00
     Exponent=  1.8504536357D-01 Coefficients=  1.0000000000D+00
 P 4 1.00
     Exponent=  6.3274954801D+01 Coefficients=  6.0685103418D-03
     Exponent=  1.4627049379D+01 Coefficients=  4.1912575824D-02
     Exponent=  4.4501223456D+00 Coefficients=  1.6153841088D-01
     Exponent=  1.5275799647D+00 Coefficients=  3.5706951311D-01
 P 1 1.00
     Exponent=  5.2935117943D-01 Coefficients=  4.4794207502D-01
 P 1 1.00
     Exponent=  1.7478421270D-01 Coefficients=  2.4446069663D-01
 D 1 1.00
     Exponent=  2.3140000000D+00 Coefficients=  1.0000000000D+00
 D 1 1.00
     Exponent=  6.4500000000D-01 Coefficients=  1.0000000000D+00
 F 1 1.00
     Exponent=  1.4280000000D+00 Coefficients=  1.0000000000D+00
 ****
 Centers:      23
 S 8 1.00
     Exponent=  5.6507325256D+05 Coefficients=  2.3660314690D-04
     Exponent=  8.4701723179D+04 Coefficients=  1.8348332508D-03
     Exponent=  1.9276271900D+04 Coefficients=  9.5465849860D-03
     Exponent=  5.4564284576D+03 Coefficients=  3.8877142153D-02
     Exponent=  1.7769503500D+03 Coefficients=  1.2718314231D-01
     Exponent=  6.3919398276D+02 Coefficients=  3.0437662191D-01
     Exponent=  2.4878823961D+02 Coefficients=  4.4490940497D-01
     Exponent=  9.8678305494D+01 Coefficients=  2.4381643058D-01
 S 4 1.00
     Exponent=  6.0607824568D+02 Coefficients= -2.6527158709D-02
     Exponent=  1.8845598484D+02 Coefficients= -1.2484584809D-01
     Exponent=  3.1497144506D+01 Coefficients=  5.6468683559D-01
     Exponent=  1.3736008320D+01 Coefficients=  5.5555268564D-01
 S 2 1.00
     Exponent=  2.1203212766D+01 Coefficients= -2.4940920493D-01
     Exponent=  3.7616420178D+00 Coefficients=  7.1213119743D-01
 S 1 1.00
     Exponent=  1.7735933962D+00 Coefficients=  1.0000000000D+00
 S 1 1.00
     Exponent=  4.5197413664D-01 Coefficients=  1.0000000000D+00
 S 1 1.00
     Exponent=  1.6613377099D-01 Coefficients=  1.0000000000D+00
 P 6 1.00
     Exponent=  3.0196955723D+03 Coefficients=  2.4971049798D-03
     Exponent=  7.1535481126D+02 Coefficients=  2.0419267596D-02
     Exponent=  2.2998328751D+02 Coefficients=  9.6897148309D-02
     Exponent=  8.6167844615D+01 Coefficients=  2.8053901252D-01
     Exponent=  3.4667870802D+01 Coefficients=  4.4606390473D-01
     Exponent=  1.4113870307D+01 Coefficients=  2.4410073923D-01
 P 4 1.00
     Exponent=  5.7085653082D+01 Coefficients= -2.1855950710D-02
     Exponent=  8.8193845840D+00 Coefficients=  3.2707075320D-01
     Exponent=  3.9340302872D+00 Coefficients=  5.7855229520D-01
     Exponent=  1.7998830384D+00 Coefficients=  3.3570987698D-01
 P 1 1.00
     Exponent=  6.6899410512D-01 Coefficients=  1.0000000000D+00
 P 1 1.00
     Exponent=  2.7136238231D-01 Coefficients=  1.0000000000D+00
 P 1 1.00
     Exponent=  1.0083790243D-01 Coefficients=  1.0000000000D+00
 D 5 1.00
     Exponent=  1.6885370257D+02 Coefficients=  8.9663981988D-03
     Exponent=  4.9977949919D+01 Coefficients=  6.2062059316D-02
     Exponent=  1.8274913338D+01 Coefficients=  2.1474732384D-01
     Exponent=  7.2455694631D+00 Coefficients=  4.0335336746D-01
     Exponent=  2.8562315025D+00 Coefficients=  4.2208813080D-01
 D 1 1.00
     Exponent=  1.0459621144D+00 Coefficients=  1.7874813267D-01
 D 1 1.00
     Exponent=  5.6865655000D-01 Coefficients=  1.0000000000D+00
 D 1 1.00
     Exponent=  2.2031490000D-01 Coefficients=  1.0000000000D+00
 F 1 1.00
     Exponent=  5.7083312000D-01 Coefficients=  1.0000000000D+00
 ****
 Ernie: Thresh=  0.10000D-02 Tol=  0.10000D-05 Strict=F.
 There are   673 symmetry adapted cartesian basis functions of A   symmetry.
 There are   586 symmetry adapted basis functions of A   symmetry.
   586 basis functions,   986 primitive gaussians,   673 cartesian basis functions
    71 alpha electrons       71 beta electrons
       nuclear repulsion energy      1372.3998541747 Hartrees.
 IExCor= 4336 DFT=T Ex+Corr=M062X ExCW=0 ScaHFX=  0.540000
 ScaDFX=  1.000000  1.000000  1.000000  1.000000 ScalE2=  1.000000  1.000000
 IRadAn=      0 IRanWt=     -1 IRanGd=            0 ICorTp=0 IEmpDi=131
 NAtoms=   24 NActive=   24 NUniq=   24 SFac= 1.00D+00 NAtFMM=   60 NAOKFM=F Big=F
 Integral buffers will be    262144 words long.
 Raffenetti 2 integral format.
 Two-electron integral symmetry is turned on.
 R6Disp:  Grimme-D3 Dispersion energy=       -0.0011076428 Hartrees.
 Nuclear repulsion after empirical dispersion term =     1372.3987465318 Hartrees.
 ------------------------------------------------------------------------------
 Polarizable Continuum Model (PCM)
 =================================
 Model                : PCM (using non-symmetric T matrix).
 Atomic radii         : UFF (Universal Force Field).
 Polarization charges : Total charges.
 Charge compensation  : None.
 Solution method      : On-the-fly selection.
 Cavity type          : Scaled VdW (van der Waals Surface) (Alpha=1.100).
 Cavity algorithm     : GePol (No added spheres)
                        Default sphere list used, NSphG=   24.
                        Lebedev-Laikov grids with approx.  5.0 points / Ang**2.
                        Smoothing algorithm: Karplus/York (Gamma=1.0000).
                        Polarization charges: spherical gaussians, with
                                              point-specific exponents (IZeta= 3).
                        Self-potential: point-specific (ISelfS= 7).
                        Self-field    : sphere-specific E.n sum rule (ISelfD= 2).
 Solvent              : Acetonitrile, Eps=  35.688000 Eps(inf)=   1.806874
 ------------------------------------------------------------------------------
 GePol: Number of generator spheres                  =      24
 GePol: Total number of spheres                      =      24
 GePol: Number of exposed spheres                    =      24 (100.00%)
 GePol: Number of points                             =    2170
 GePol: Average weight of points                     =       0.13
 GePol: Minimum weight of points                     =   0.16D-10
 GePol: Maximum weight of points                     =    0.20577
 GePol: Number of points with low weight             =     135
 GePol: Fraction of low-weight points (<1% of avg)   =       6.22%
 GePol: Cavity surface area                          =    279.588 Ang**2
 GePol: Cavity volume                                =    305.347 Ang**3
 Leave Link  301 at Thu Jan 09 15:40:46 2020, MaxMem=   134217728 cpu:         1.0
 (Enter E:\Gaussian\G09W\l302.exe)
 NPDir=0 NMtPBC=     1 NCelOv=     1 NCel=       1 NClECP=     1 NCelD=      1
         NCelK=      1 NCelE2=     1 NClLst=     1 CellRange=     0.0.
 One-electron integrals computed using PRISM.
 NBasis=   586 RedAO= T EigKep=  5.57D-06  NBF=   586
 NBsUse=   586 1.00D-06 EigRej= -1.00D+00 NBFU=   586
 Precomputing XC quadrature grid using
 IXCGrd= 4 IRadAn=           0 IRanWt=          -1 IRanGd=           0 AccXCQ= 0.00D+00.
 Generated NRdTot=       0 NPtTot=           0 NUsed=           0 NTot=          16
 NSgBfM=   657   657   657   657   657 MxSgAt=    24 MxSgA2=    24.
 Leave Link  302 at Thu Jan 09 15:40:51 2020, MaxMem=   134217728 cpu:         4.0
 (Enter E:\Gaussian\G09W\l303.exe)
 DipDrv:  MaxL=1.
 Leave Link  303 at Thu Jan 09 15:40:51 2020, MaxMem=   134217728 cpu:         0.0
 (Enter E:\Gaussian\G09W\l401.exe)
 ExpMin= 9.52D-02 ExpMax= 5.65D+05 ExpMxC= 5.46D+03 IAcc=2 IRadAn=         4 AccDes= 0.00D+00
 Harris functional with IExCor= 1009 and IRadAn=       4 diagonalized for initial guess.
 HarFok:  IExCor= 1009 AccDes= 0.00D+00 IRadAn=         4 IDoV= 1 UseB2=F ITyADJ=14
 ICtDFT=  3500011 ScaDFX=  1.000000  1.000000  1.000000  1.000000
 FoFCou: FMM=F IPFlag=           0 FMFlag=      100000 FMFlg1=           0
         NFxFlg=           0 DoJE=T BraDBF=F KetDBF=T FulRan=T
         wScrn=  0.000000 ICntrl=     500 IOpCl=  0 I1Cent=   200000004 NGrid=           0
         NMat0=    1 NMatS0=      1 NMatT0=    0 NMatD0=    1 NMtDS0=    0 NMtDT0=    0
 Petite list used in FoFCou.
 Harris En= -3261.56406110380    
 JPrj=0 DoOrth=F DoCkMO=F.
 Leave Link  401 at Thu Jan 09 15:41:56 2020, MaxMem=   134217728 cpu:        64.0
 (Enter E:\Gaussian\G09W\l502.exe)
 Closed shell SCF:
 Using DIIS extrapolation, IDIIS=  1040.
 Integral symmetry usage will be decided dynamically.
 IVT=     1385392 IEndB=     1385392 NGot=   134217728 MDV=   133302579
 LenX=   133302579 LenY=   132848977
 Requested convergence on RMS density matrix=1.00D-08 within 128 cycles.
 Requested convergence on MAX density matrix=1.00D-06.
 Requested convergence on             energy=1.00D-06.
 No special actions if energy rises.
 Fock matrices will be formed incrementally for  20 cycles.

 Cycle   1  Pass 1  IDiag  1:
 FoFJK:  IHMeth= 1 ICntrl=       0 DoSepK=F KAlg= 0 I1Cent=   0 FoldK=F
 IRaf= 830000000 NMat=   1 IRICut=       1 DoRegI=T DoRafI=F ISym2E= 0.
 FoFCou: FMM=F IPFlag=           0 FMFlag=      100000 FMFlg1=           0
         NFxFlg=           0 DoJE=F BraDBF=F KetDBF=F FulRan=T
         wScrn=  0.000000 ICntrl=       0 IOpCl=  0 I1Cent=           0 NGrid=           0
         NMat0=    1 NMatS0=      1 NMatT0=    0 NMatD0=    1 NMtDS0=    0 NMtDT0=    0
 Symmetry not used in FoFCou.
 Inv3:  Mode=1 IEnd=    14126700.
 Iteration    1 A*A^-1 deviation from unit magnitude is 3.11D-15 for    796.
 Iteration    1 A*A^-1 deviation from orthogonality  is 2.10D-15 for   1120    802.
 Iteration    1 A^-1*A deviation from unit magnitude is 2.44D-15 for   1864.
 Iteration    1 A^-1*A deviation from orthogonality  is 1.37D-13 for   2140   1456.
 E= -3261.99858158576    
 DIIS: error= 2.75D-02 at cycle   1 NSaved=   1.
 NSaved= 1 IEnMin= 1 EnMin= -3261.99858158576     IErMin= 1 ErrMin= 2.75D-02
 ErrMax= 2.75D-02  0.00D+00 EMaxC= 1.00D-01 BMatC= 6.72D-01 BMatP= 6.72D-01
 IDIUse=3 WtCom= 7.25D-01 WtEn= 2.75D-01
 Coeff-Com:  0.100D+01
 Coeff-En:   0.100D+01
 Coeff:      0.100D+01
 Gap=     0.266 Goal=   None    Shift=    0.000
 GapD=    0.266 DampG=1.000 DampE=0.500 DampFc=0.5000 IDamp=-1.
 Damping current iteration by 5.00D-01
 RMSDP=5.71D-03 MaxDP=3.08D-01              OVMax= 1.73D-01

 Cycle   2  Pass 1  IDiag  1:
 RMSU=  2.85D-03    CP:  1.01D+00
 E= -3262.17115580783     Delta-E=       -0.172574222070 Rises=F Damp=T
 DIIS: error= 7.22D-03 at cycle   2 NSaved=   2.
 NSaved= 2 IEnMin= 2 EnMin= -3262.17115580783     IErMin= 2 ErrMin= 7.22D-03
 ErrMax= 7.22D-03  0.00D+00 EMaxC= 1.00D-01 BMatC= 6.31D-02 BMatP= 6.72D-01
 IDIUse=3 WtCom= 9.28D-01 WtEn= 7.22D-02
 Coeff-Com: -0.107D+00 0.111D+01
 Coeff-En:   0.000D+00 0.100D+01
 Coeff:     -0.993D-01 0.110D+01
 Gap=     0.241 Goal=   None    Shift=    0.000
 RMSDP=1.89D-03 MaxDP=1.04D-01 DE=-1.73D-01 OVMax= 1.60D-01

 Cycle   3  Pass 1  IDiag  1:
 RMSU=  1.59D-03    CP:  9.77D-01  6.67D-01
 E= -3262.32248178561     Delta-E=       -0.151325977774 Rises=F Damp=F
 DIIS: error= 1.10D-02 at cycle   3 NSaved=   3.
 NSaved= 3 IEnMin= 3 EnMin= -3262.32248178561     IErMin= 2 ErrMin= 7.22D-03
 ErrMax= 1.10D-02  0.00D+00 EMaxC= 1.00D-01 BMatC= 4.64D-02 BMatP= 6.31D-02
 IDIUse=3 WtCom= 8.90D-01 WtEn= 1.10D-01
 Coeff-Com: -0.140D+00 0.560D+00 0.580D+00
 Coeff-En:   0.000D+00 0.000D+00 0.100D+01
 Coeff:     -0.125D+00 0.499D+00 0.626D+00
 Gap=     0.225 Goal=   None    Shift=    0.000
 RMSDP=6.33D-04 MaxDP=4.19D-02 DE=-1.51D-01 OVMax= 7.20D-02

 Cycle   4  Pass 1  IDiag  1:
 RMSU=  4.41D-04    CP:  9.83D-01  8.03D-01  8.60D-01
 E= -3262.35235233700     Delta-E=       -0.029870551394 Rises=F Damp=F
 DIIS: error= 5.31D-03 at cycle   4 NSaved=   4.
 NSaved= 4 IEnMin= 4 EnMin= -3262.35235233700     IErMin= 4 ErrMin= 5.31D-03
 ErrMax= 5.31D-03  0.00D+00 EMaxC= 1.00D-01 BMatC= 8.47D-03 BMatP= 4.64D-02
 IDIUse=3 WtCom= 9.47D-01 WtEn= 5.31D-02
 Coeff-Com: -0.398D-01 0.104D+00 0.341D+00 0.595D+00
 Coeff-En:   0.000D+00 0.000D+00 0.165D+00 0.835D+00
 Coeff:     -0.377D-01 0.983D-01 0.332D+00 0.608D+00
 Gap=     0.228 Goal=   None    Shift=    0.000
 DSYEVD-2 returned Info=      323436 IAlg= 4 N=   586 NDim=   586 NE2=      226703 trying  DSYEV.
 RMSDP=2.79D-04 MaxDP=1.79D-02 DE=-2.99D-02 OVMax= 2.15D-02

 Cycle   5  Pass 1  IDiag  1:
 RMSU=  9.46D-05    CP:  9.80D-01  7.36D-01  9.26D-01  6.81D-01
 E= -3262.35908981522     Delta-E=       -0.006737478222 Rises=F Damp=F
 DIIS: error= 4.80D-04 at cycle   5 NSaved=   5.
 NSaved= 5 IEnMin= 5 EnMin= -3262.35908981522     IErMin= 5 ErrMin= 4.80D-04
 ErrMax= 4.80D-04  0.00D+00 EMaxC= 1.00D-01 BMatC= 1.65D-04 BMatP= 8.47D-03
 IDIUse=3 WtCom= 9.95D-01 WtEn= 4.80D-03
 Coeff-Com: -0.632D-02 0.104D-01 0.988D-01 0.247D+00 0.651D+00
 Coeff-En:   0.000D+00 0.000D+00 0.000D+00 0.000D+00 0.100D+01
 Coeff:     -0.629D-02 0.103D-01 0.983D-01 0.245D+00 0.652D+00
 Gap=     0.228 Goal=   None    Shift=    0.000
 RMSDP=4.35D-05 MaxDP=2.78D-03 DE=-6.74D-03 OVMax= 2.87D-03

 Cycle   6  Pass 1  IDiag  1:
 RMSU=  2.26D-05    CP:  9.80D-01  7.46D-01  9.19D-01  7.09D-01  8.13D-01
 E= -3262.35923952501     Delta-E=       -0.000149709786 Rises=F Damp=F
 DIIS: error= 1.08D-04 at cycle   6 NSaved=   6.
 NSaved= 6 IEnMin= 6 EnMin= -3262.35923952501     IErMin= 6 ErrMin= 1.08D-04
 ErrMax= 1.08D-04  0.00D+00 EMaxC= 1.00D-01 BMatC= 6.74D-06 BMatP= 1.65D-04
 IDIUse=3 WtCom= 9.99D-01 WtEn= 1.08D-03
 Coeff-Com:  0.120D-02-0.440D-02 0.818D-02 0.378D-01 0.207D+00 0.751D+00
 Coeff-En:   0.000D+00 0.000D+00 0.000D+00 0.000D+00 0.000D+00 0.100D+01
 Coeff:      0.120D-02-0.440D-02 0.817D-02 0.377D-01 0.206D+00 0.751D+00
 Gap=     0.228 Goal=   None    Shift=    0.000
 RMSDP=2.59D-05 MaxDP=1.24D-03 DE=-1.50D-04 OVMax= 5.59D-04

 Cycle   7  Pass 1  IDiag  1:
 RMSU=  9.16D-06    CP:  9.80D-01  7.38D-01  9.22D-01  7.16D-01  8.58D-01
                    CP:  9.76D-01
 E= -3262.35924623737     Delta-E=       -0.000006712366 Rises=F Damp=F
 DIIS: error= 3.45D-05 at cycle   7 NSaved=   7.
 NSaved= 7 IEnMin= 7 EnMin= -3262.35924623737     IErMin= 7 ErrMin= 3.45D-05
 ErrMax= 3.45D-05  0.00D+00 EMaxC= 1.00D-01 BMatC= 6.19D-07 BMatP= 6.74D-06
 IDIUse=1 WtCom= 1.00D+00 WtEn= 0.00D+00
 Coeff-Com:  0.817D-03-0.203D-02-0.667D-02-0.153D-01-0.809D-02 0.187D+00
 Coeff-Com:  0.844D+00
 Coeff:      0.817D-03-0.203D-02-0.667D-02-0.153D-01-0.809D-02 0.187D+00
 Coeff:      0.844D+00
 Gap=     0.228 Goal=   None    Shift=    0.000
 RMSDP=5.38D-06 MaxDP=2.78D-04 DE=-6.71D-06 OVMax= 5.20D-04

 Cycle   8  Pass 1  IDiag  1:
 RMSU=  2.35D-06    CP:  9.80D-01  7.36D-01  9.22D-01  7.18D-01  8.74D-01
                    CP:  1.05D+00  1.15D+00
 E= -3262.35924707784     Delta-E=       -0.000000840464 Rises=F Damp=F
 DIIS: error= 1.73D-05 at cycle   8 NSaved=   8.
 NSaved= 8 IEnMin= 8 EnMin= -3262.35924707784     IErMin= 8 ErrMin= 1.73D-05
 ErrMax= 1.73D-05  0.00D+00 EMaxC= 1.00D-01 BMatC= 1.89D-07 BMatP= 6.19D-07
 IDIUse=1 WtCom= 1.00D+00 WtEn= 0.00D+00
 Coeff-Com:  0.261D-03-0.501D-03-0.402D-02-0.120D-01-0.252D-01 0.460D-02
 Coeff-Com:  0.411D+00 0.626D+00
 Coeff:      0.261D-03-0.501D-03-0.402D-02-0.120D-01-0.252D-01 0.460D-02
 Coeff:      0.411D+00 0.626D+00
 Gap=     0.228 Goal=   None    Shift=    0.000
 RMSDP=3.26D-06 MaxDP=1.51D-04 DE=-8.40D-07 OVMax= 1.48D-04

 Cycle   9  Pass 1  IDiag  1:
 RMSU=  8.25D-07    CP:  9.80D-01  7.35D-01  9.23D-01  7.18D-01  8.81D-01
                    CP:  1.05D+00  1.25D+00  1.07D+00
 E= -3262.35924727832     Delta-E=       -0.000000200483 Rises=F Damp=F
 DIIS: error= 6.36D-06 at cycle   9 NSaved=   9.
 NSaved= 9 IEnMin= 9 EnMin= -3262.35924727832     IErMin= 9 ErrMin= 6.36D-06
 ErrMax= 6.36D-06  0.00D+00 EMaxC= 1.00D-01 BMatC= 1.01D-08 BMatP= 1.89D-07
 IDIUse=1 WtCom= 1.00D+00 WtEn= 0.00D+00
 Coeff-Com: -0.625D-05 0.702D-04-0.309D-03-0.177D-02-0.575D-02-0.242D-01
 Coeff-Com:  0.162D-01 0.136D+00 0.879D+00
 Coeff:     -0.625D-05 0.702D-04-0.309D-03-0.177D-02-0.575D-02-0.242D-01
 Coeff:      0.162D-01 0.136D+00 0.879D+00
 Gap=     0.228 Goal=   None    Shift=    0.000
 RMSDP=1.09D-06 MaxDP=6.09D-05 DE=-2.00D-07 OVMax= 8.87D-05

 Cycle  10  Pass 1  IDiag  1:
 RMSU=  3.10D-07    CP:  9.80D-01  7.35D-01  9.23D-01  7.18D-01  8.82D-01
                    CP:  1.06D+00  1.28D+00  1.16D+00  1.14D+00
 E= -3262.35924729844     Delta-E=       -0.000000020122 Rises=F Damp=F
 DIIS: error= 2.35D-06 at cycle  10 NSaved=  10.
 NSaved=10 IEnMin=10 EnMin= -3262.35924729844     IErMin=10 ErrMin= 2.35D-06
 ErrMax= 2.35D-06  0.00D+00 EMaxC= 1.00D-01 BMatC= 1.98D-09 BMatP= 1.01D-08
 IDIUse=1 WtCom= 1.00D+00 WtEn= 0.00D+00
 Coeff-Com: -0.398D-04 0.950D-04 0.496D-03 0.108D-02 0.116D-02-0.102D-01
 Coeff-Com: -0.434D-01-0.506D-01 0.303D+00 0.798D+00
 Coeff:     -0.398D-04 0.950D-04 0.496D-03 0.108D-02 0.116D-02-0.102D-01
 Coeff:     -0.434D-01-0.506D-01 0.303D+00 0.798D+00
 Gap=     0.228 Goal=   None    Shift=    0.000
 RMSDP=6.34D-07 MaxDP=3.14D-05 DE=-2.01D-08 OVMax= 2.95D-05

 Cycle  11  Pass 1  IDiag  1:
 RMSU=  9.88D-08    CP:  9.80D-01  7.35D-01  9.23D-01  7.18D-01  8.83D-01
                    CP:  1.06D+00  1.30D+00  1.19D+00  1.28D+00  1.13D+00
 E= -3262.35924730148     Delta-E=       -0.000000003042 Rises=F Damp=F
 DIIS: error= 7.98D-07 at cycle  11 NSaved=  11.
 NSaved=11 IEnMin=11 EnMin= -3262.35924730148     IErMin=11 ErrMin= 7.98D-07
 ErrMax= 7.98D-07  0.00D+00 EMaxC= 1.00D-01 BMatC= 2.03D-10 BMatP= 1.98D-09
 IDIUse=1 WtCom= 1.00D+00 WtEn= 0.00D+00
 Coeff-Com: -0.117D-04 0.240D-04 0.203D-03 0.536D-03 0.920D-03-0.130D-02
 Coeff-Com: -0.159D-01-0.357D-01 0.349D-01 0.281D+00 0.735D+00
 Coeff:     -0.117D-04 0.240D-04 0.203D-03 0.536D-03 0.920D-03-0.130D-02
 Coeff:     -0.159D-01-0.357D-01 0.349D-01 0.281D+00 0.735D+00
 Gap=     0.228 Goal=   None    Shift=    0.000
 RMSDP=1.04D-07 MaxDP=6.67D-06 DE=-3.04D-09 OVMax= 9.45D-06

 Cycle  12  Pass 1  IDiag  1:
 RMSU=  4.03D-08    CP:  9.80D-01  7.35D-01  9.23D-01  7.18D-01  8.83D-01
                    CP:  1.06D+00  1.30D+00  1.20D+00  1.30D+00  1.24D+00
                    CP:  1.06D+00
 E= -3262.35924730178     Delta-E=       -0.000000000292 Rises=F Damp=F
 DIIS: error= 3.76D-07 at cycle  12 NSaved=  12.
 NSaved=12 IEnMin=12 EnMin= -3262.35924730178     IErMin=12 ErrMin= 3.76D-07
 ErrMax= 3.76D-07  0.00D+00 EMaxC= 1.00D-01 BMatC= 4.62D-11 BMatP= 2.03D-10
 IDIUse=1 WtCom= 1.00D+00 WtEn= 0.00D+00
 Coeff-Com:  0.320D-05-0.915D-05-0.601D-05 0.309D-04 0.219D-03 0.144D-02
 Coeff-Com:  0.105D-02-0.903D-02-0.408D-01-0.363D-01 0.326D+00 0.758D+00
 Coeff:      0.320D-05-0.915D-05-0.601D-05 0.309D-04 0.219D-03 0.144D-02
 Coeff:      0.105D-02-0.903D-02-0.408D-01-0.363D-01 0.326D+00 0.758D+00
 Gap=     0.228 Goal=   None    Shift=    0.000
 RMSDP=5.43D-08 MaxDP=2.99D-06 DE=-2.92D-10 OVMax= 4.67D-06

 Cycle  13  Pass 1  IDiag  1:
 RMSU=  1.83D-08    CP:  9.80D-01  7.35D-01  9.23D-01  7.18D-01  8.83D-01
                    CP:  1.06D+00  1.30D+00  1.20D+00  1.31D+00  1.27D+00
                    CP:  1.20D+00  9.85D-01
 E= -3262.35924730185     Delta-E=       -0.000000000074 Rises=F Damp=F
 DIIS: error= 1.25D-07 at cycle  13 NSaved=  13.
 NSaved=13 IEnMin=13 EnMin= -3262.35924730185     IErMin=13 ErrMin= 1.25D-07
 ErrMax= 1.25D-07  0.00D+00 EMaxC= 1.00D-01 BMatC= 5.93D-12 BMatP= 4.62D-11
 IDIUse=1 WtCom= 1.00D+00 WtEn= 0.00D+00
 Coeff-Com:  0.255D-05-0.619D-05-0.251D-04-0.491D-04-0.167D-04 0.696D-03
 Coeff-Com:  0.241D-02 0.306D-03-0.186D-01-0.465D-01 0.412D-01 0.316D+00
 Coeff-Com:  0.704D+00
 Coeff:      0.255D-05-0.619D-05-0.251D-04-0.491D-04-0.167D-04 0.696D-03
 Coeff:      0.241D-02 0.306D-03-0.186D-01-0.465D-01 0.412D-01 0.316D+00
 Coeff:      0.704D+00
 Gap=     0.228 Goal=   None    Shift=    0.000
 RMSDP=1.16D-08 MaxDP=6.48D-07 DE=-7.37D-11 OVMax= 1.74D-06

 Cycle  14  Pass 1  IDiag  1:
 RMSU=  5.66D-09    CP:  9.80D-01  7.35D-01  9.23D-01  7.18D-01  8.83D-01
                    CP:  1.06D+00  1.30D+00  1.20D+00  1.31D+00  1.29D+00
                    CP:  1.22D+00  1.13D+00  9.60D-01
 E= -3262.35924730180     Delta-E=        0.000000000046 Rises=F Damp=F
 DIIS: error= 4.48D-08 at cycle  14 NSaved=  14.
 NSaved=14 IEnMin=13 EnMin= -3262.35924730185     IErMin=14 ErrMin= 4.48D-08
 ErrMax= 4.48D-08  0.00D+00 EMaxC= 1.00D-01 BMatC= 1.13D-12 BMatP= 5.93D-12
 IDIUse=1 WtCom= 1.00D+00 WtEn= 0.00D+00
 Coeff-Com:  0.356D-06-0.632D-06-0.989D-05-0.280D-04-0.556D-04-0.888D-05
 Coeff-Com:  0.921D-03 0.212D-02-0.152D-03-0.145D-01-0.553D-01-0.124D-01
 Coeff-Com:  0.314D+00 0.765D+00
 Coeff:      0.356D-06-0.632D-06-0.989D-05-0.280D-04-0.556D-04-0.888D-05
 Coeff:      0.921D-03 0.212D-02-0.152D-03-0.145D-01-0.553D-01-0.124D-01
 Coeff:      0.314D+00 0.765D+00
 Gap=     0.228 Goal=   None    Shift=    0.000
 RMSDP=4.01D-09 MaxDP=1.66D-07 DE= 4.64D-11 OVMax= 8.37D-07

 Error on total polarization charges =  0.01670
 SCF Done:  E(RM062X) =  -3262.35924730     A.U. after   14 cycles
            NFock= 14  Conv=0.40D-08     -V/T= 2.0021
 KE= 3.255515252035D+03 PE=-1.049916928007D+04 EE= 2.608896034206D+03
 Leave Link  502 at Thu Jan 09 19:21:42 2020, MaxMem=   134217728 cpu:     13186.0
 (Enter E:\Gaussian\G09W\l601.exe)
 Copying SCF densities to generalized density rwf, IOpCl= 0 IROHF=0.

 **********************************************************************

            Population analysis using the SCF density.

 **********************************************************************

 Orbital symmetries:
       Occupied  (A) (A) (A) (A) (A) (A) (A) (A) (A) (A) (A) (A)
                 (A) (A) (A) (A) (A) (A) (A) (A) (A) (A) (A) (A)
                 (A) (A) (A) (A) (A) (A) (A) (A) (A) (A) (A) (A)
                 (A) (A) (A) (A) (A) (A) (A) (A) (A) (A) (A) (A)
                 (A) (A) (A) (A) (A) (A) (A) (A) (A) (A) (A) (A)
                 (A) (A) (A) (A) (A) (A) (A) (A) (A) (A) (A)
       Virtual   (A) (A) (A) (A) (A) (A) (A) (A) (A) (A) (A) (A)
                 (A) (A) (A) (A) (A) (A) (A) (A) (A) (A) (A) (A)
                 (A) (A) (A) (A) (A) (A) (A) (A) (A) (A) (A) (A)
                 (A) (A) (A) (A) (A) (A) (A) (A) (A) (A) (A) (A)
                 (A) (A) (A) (A) (A) (A) (A) (A) (A) (A) (A) (A)
                 (A) (A) (A) (A) (A) (A) (A) (A) (A) (A) (A) (A)
                 (A) (A) (A) (A) (A) (A) (A) (A) (A) (A) (A) (A)
                 (A) (A) (A) (A) (A) (A) (A) (A) (A) (A) (A) (A)
                 (A) (A) (A) (A) (A) (A) (A) (A) (A) (A) (A) (A)
                 (A) (A) (A) (A) (A) (A) (A) (A) (A) (A) (A) (A)
                 (A) (A) (A) (A) (A) (A) (A) (A) (A) (A) (A) (A)
                 (A) (A) (A) (A) (A) (A) (A) (A) (A) (A) (A) (A)
                 (A) (A) (A) (A) (A) (A) (A) (A) (A) (A) (A) (A)
                 (A) (A) (A) (A) (A) (A) (A) (A) (A) (A) (A) (A)
                 (A) (A) (A) (A) (A) (A) (A) (A) (A) (A) (A) (A)
                 (A) (A) (A) (A) (A) (A) (A) (A) (A) (A) (A) (A)
                 (A) (A) (A) (A) (A) (A) (A) (A) (A) (A) (A) (A)
                 (A) (A) (A) (A) (A) (A) (A) (A) (A) (A) (A) (A)
                 (A) (A) (A) (A) (A) (A) (A) (A) (A) (A) (A) (A)
                 (A) (A) (A) (A) (A) (A) (A) (A) (A) (A) (A) (A)
                 (A) (A) (A) (A) (A) (A) (A) (A) (A) (A) (A) (A)
                 (A) (A) (A) (A) (A) (A) (A) (A) (A) (A) (A) (A)
                 (A) (A) (A) (A) (A) (A) (A) (A) (A) (A) (A) (A)
                 (A) (A) (A) (A) (A) (A) (A) (A) (A) (A) (A) (A)
                 (A) (A) (A) (A) (A) (A) (A) (A) (A) (A) (A) (A)
                 (A) (A) (A) (A) (A) (A) (A) (A) (A) (A) (A) (A)
                 (A) (A) (A) (A) (A) (A) (A) (A) (A) (A) (A) (A)
                 (A) (A) (A) (A) (A) (A) (A) (A) (A) (A) (A) (A)
                 (A) (A) (A) (A) (A) (A) (A) (A) (A) (A) (A) (A)
                 (A) (A) (A) (A) (A) (A) (A) (A) (A) (A) (A) (A)
                 (A) (A) (A) (A) (A) (A) (A) (A) (A) (A) (A) (A)
                 (A) (A) (A) (A) (A) (A) (A) (A) (A) (A) (A) (A)
                 (A) (A) (A) (A) (A) (A) (A) (A) (A) (A) (A) (A)
                 (A) (A) (A) (A) (A) (A) (A) (A) (A) (A) (A) (A)
                 (A) (A) (A) (A) (A) (A) (A) (A) (A) (A) (A) (A)
                 (A) (A) (A) (A) (A) (A) (A) (A) (A) (A) (A) (A)
                 (A) (A) (A) (A) (A) (A) (A) (A) (A) (A) (A) (A)
                 (A) (A) (A) (A) (A) (A) (A) (A) (A) (A) (A) (A)
                 (A) (A) (A) (A) (A) (A) (A) (A) (A) (A) (A) (A)
                 (A) (A) (A) (A) (A) (A) (A) (A) (A) (A) (A) (A)
                 (A) (A) (A) (A) (A) (A) (A) (A) (A) (A) (A) (A)
                 (A) (A) (A) (A) (A) (A) (A) (A) (A) (A) (A) (A)
                 (A) (A) (A) (A) (A) (A) (A) (A) (A) (A) (A)
 The electronic state is 1-A.
 Alpha  occ. eigenvalues -- -485.38915 -63.37381 -57.19320 -57.19082 -57.19071
 Alpha  occ. eigenvalues --  -19.64230 -19.64069 -10.65782 -10.65640 -10.62635
 Alpha  occ. eigenvalues --  -10.58592 -10.58226 -10.57877 -10.57805 -10.57785
 Alpha  occ. eigenvalues --  -10.57761 -10.57429 -10.56678 -10.56650 -10.56593
 Alpha  occ. eigenvalues --  -10.56549  -9.04024  -6.86437  -6.85553  -6.85515
 Alpha  occ. eigenvalues --   -2.89811  -2.89494  -2.89454  -2.88631  -2.88630
 Alpha  occ. eigenvalues --   -1.18948  -1.18673  -1.00924  -0.99076  -0.93312
 Alpha  occ. eigenvalues --   -0.89646  -0.87929  -0.87470  -0.84436  -0.78223
 Alpha  occ. eigenvalues --   -0.75428  -0.72482  -0.70337  -0.67110  -0.64300
 Alpha  occ. eigenvalues --   -0.62969  -0.58904  -0.56437  -0.56217  -0.54571
 Alpha  occ. eigenvalues --   -0.53977  -0.53541  -0.52871  -0.51750  -0.51470
 Alpha  occ. eigenvalues --   -0.50682  -0.49462  -0.47633  -0.45744  -0.44547
 Alpha  occ. eigenvalues --   -0.44350  -0.43622  -0.42515  -0.39224  -0.36794
 Alpha  occ. eigenvalues --   -0.36419  -0.34728  -0.34284  -0.33488  -0.33072
 Alpha  occ. eigenvalues --   -0.31720
 Alpha virt. eigenvalues --   -0.08942  -0.04615  -0.00819   0.00479   0.02497
 Alpha virt. eigenvalues --    0.07548   0.08094   0.08854   0.10063   0.10893
 Alpha virt. eigenvalues --    0.11212   0.11737   0.13283   0.13788   0.14470
 Alpha virt. eigenvalues --    0.14712   0.16448   0.16840   0.17973   0.19889
 Alpha virt. eigenvalues --    0.20291   0.21216   0.21770   0.22084   0.22189
 Alpha virt. eigenvalues --    0.22933   0.23800   0.24165   0.24456   0.25105
 Alpha virt. eigenvalues --    0.25589   0.25949   0.26552   0.26733   0.26882
 Alpha virt. eigenvalues --    0.27424   0.28266   0.28935   0.29446   0.29967
 Alpha virt. eigenvalues --    0.30740   0.31676   0.31752   0.33019   0.33114
 Alpha virt. eigenvalues --    0.33613   0.33851   0.34092   0.34623   0.35957
 Alpha virt. eigenvalues --    0.36388   0.37595   0.37997   0.38417   0.38638
 Alpha virt. eigenvalues --    0.38838   0.39794   0.40161   0.41036   0.41600
 Alpha virt. eigenvalues --    0.41909   0.43763   0.43865   0.43938   0.45294
 Alpha virt. eigenvalues --    0.46194   0.46460   0.48105   0.48813   0.49434
 Alpha virt. eigenvalues --    0.50682   0.50735   0.50901   0.51513   0.51886
 Alpha virt. eigenvalues --    0.52760   0.52982   0.53976   0.54673   0.55922
 Alpha virt. eigenvalues --    0.56155   0.56713   0.56964   0.59007   0.59975
 Alpha virt. eigenvalues --    0.61690   0.61902   0.62949   0.64271   0.65179
 Alpha virt. eigenvalues --    0.66648   0.67679   0.67893   0.67982   0.68184
 Alpha virt. eigenvalues --    0.68980   0.69270   0.70670   0.72323   0.72841
 Alpha virt. eigenvalues --    0.73212   0.73732   0.74307   0.75761   0.76181
 Alpha virt. eigenvalues --    0.76188   0.76528   0.77777   0.78407   0.78872
 Alpha virt. eigenvalues --    0.79197   0.80383   0.80998   0.81836   0.82406
 Alpha virt. eigenvalues --    0.83464   0.85504   0.86284   0.87365   0.88018
 Alpha virt. eigenvalues --    0.89013   0.90075   0.90652   0.90659   0.91196
 Alpha virt. eigenvalues --    0.92151   0.92196   0.92999   0.96066   0.97502
 Alpha virt. eigenvalues --    0.97784   0.98321   0.99581   0.99950   1.01182
 Alpha virt. eigenvalues --    1.02104   1.04613   1.04660   1.05207   1.06547
 Alpha virt. eigenvalues --    1.10152   1.10472   1.10540   1.12192   1.13913
 Alpha virt. eigenvalues --    1.14048   1.15082   1.15721   1.18532   1.20258
 Alpha virt. eigenvalues --    1.21910   1.22855   1.23295   1.24130   1.24425
 Alpha virt. eigenvalues --    1.25549   1.26273   1.27028   1.27728   1.27998
 Alpha virt. eigenvalues --    1.28580   1.30176   1.31054   1.34067   1.34089
 Alpha virt. eigenvalues --    1.36081   1.37233   1.39249   1.39321   1.41072
 Alpha virt. eigenvalues --    1.41309   1.41521   1.41828   1.42852   1.45371
 Alpha virt. eigenvalues --    1.45580   1.46388   1.46908   1.47693   1.48986
 Alpha virt. eigenvalues --    1.49914   1.50306   1.52399   1.52780   1.53527
 Alpha virt. eigenvalues --    1.53712   1.54054   1.56161   1.56785   1.57487
 Alpha virt. eigenvalues --    1.58237   1.58831   1.60644   1.60847   1.62446
 Alpha virt. eigenvalues --    1.63489   1.64147   1.64496   1.64750   1.65874
 Alpha virt. eigenvalues --    1.67237   1.67292   1.68786   1.69573   1.70619
 Alpha virt. eigenvalues --    1.71016   1.72060   1.72468   1.73479   1.74955
 Alpha virt. eigenvalues --    1.75178   1.75782   1.78954   1.79381   1.80324
 Alpha virt. eigenvalues --    1.81304   1.81963   1.83454   1.84843   1.85988
 Alpha virt. eigenvalues --    1.86893   1.88740   1.89422   1.90071   1.91214
 Alpha virt. eigenvalues --    1.91367   1.91976   1.94389   1.94820   1.97430
 Alpha virt. eigenvalues --    2.00709   2.01066   2.02239   2.04344   2.05562
 Alpha virt. eigenvalues --    2.07477   2.08260   2.08997   2.12240   2.13505
 Alpha virt. eigenvalues --    2.15180   2.16701   2.17984   2.18457   2.19667
 Alpha virt. eigenvalues --    2.21064   2.21258   2.21539   2.23624   2.24327
 Alpha virt. eigenvalues --    2.26286   2.30259   2.31916   2.32013   2.33933
 Alpha virt. eigenvalues --    2.35744   2.36433   2.37059   2.37264   2.39219
 Alpha virt. eigenvalues --    2.40921   2.44503   2.45451   2.46079   2.49395
 Alpha virt. eigenvalues --    2.51000   2.52386   2.53635   2.54319   2.54839
 Alpha virt. eigenvalues --    2.58296   2.59302   2.59536   2.60591   2.61616
 Alpha virt. eigenvalues --    2.61931   2.63187   2.64148   2.65272   2.65731
 Alpha virt. eigenvalues --    2.67256   2.67632   2.68997   2.69796   2.71073
 Alpha virt. eigenvalues --    2.71633   2.72436   2.74136   2.74964   2.75910
 Alpha virt. eigenvalues --    2.76347   2.77499   2.77653   2.79923   2.80174
 Alpha virt. eigenvalues --    2.81618   2.82049   2.82699   2.82934   2.83632
 Alpha virt. eigenvalues --    2.85053   2.87325   2.87593   2.88095   2.88390
 Alpha virt. eigenvalues --    2.88966   2.89227   2.89456   2.90657   2.91978
 Alpha virt. eigenvalues --    2.93576   2.94268   2.95692   2.96453   2.97023
 Alpha virt. eigenvalues --    2.98029   2.98847   2.99157   2.99569   3.01568
 Alpha virt. eigenvalues --    3.01894   3.02597   3.03289   3.04903   3.05377
 Alpha virt. eigenvalues --    3.06819   3.09476   3.09926   3.10929   3.11748
 Alpha virt. eigenvalues --    3.12678   3.13470   3.14602   3.14925   3.16448
 Alpha virt. eigenvalues --    3.16542   3.17377   3.18137   3.18870   3.19449
 Alpha virt. eigenvalues --    3.20627   3.22660   3.23189   3.24863   3.25919
 Alpha virt. eigenvalues --    3.27958   3.29453   3.29741   3.30611   3.31092
 Alpha virt. eigenvalues --    3.31963   3.32268   3.33091   3.33763   3.34805
 Alpha virt. eigenvalues --    3.35674   3.37988   3.38360   3.38588   3.40030
 Alpha virt. eigenvalues --    3.40850   3.40997   3.42678   3.43231   3.44569
 Alpha virt. eigenvalues --    3.44797   3.46296   3.46698   3.47038   3.47853
 Alpha virt. eigenvalues --    3.49864   3.50505   3.51120   3.51305   3.51890
 Alpha virt. eigenvalues --    3.53135   3.54806   3.54956   3.56044   3.57061
 Alpha virt. eigenvalues --    3.59420   3.59677   3.61134   3.62442   3.65532
 Alpha virt. eigenvalues --    3.66573   3.67106   3.68961   3.71507   3.75485
 Alpha virt. eigenvalues --    3.77895   3.78914   3.79272   3.80957   3.83591
 Alpha virt. eigenvalues --    3.84536   3.85886   3.86739   3.87519   3.89021
 Alpha virt. eigenvalues --    3.92008   3.92892   3.93755   3.97541   3.98211
 Alpha virt. eigenvalues --    4.02276   4.03589   4.04136   4.05127   4.05244
 Alpha virt. eigenvalues --    4.09814   4.10756   4.11745   4.12156   4.12692
 Alpha virt. eigenvalues --    4.13134   4.13426   4.15048   4.17096   4.17548
 Alpha virt. eigenvalues --    4.17620   4.19692   4.20521   4.21915   4.22230
 Alpha virt. eigenvalues --    4.23217   4.26402   4.27262   4.29256   4.29785
 Alpha virt. eigenvalues --    4.32479   4.32857   4.33817   4.37000   4.38675
 Alpha virt. eigenvalues --    4.39790   4.47722   4.49130   4.51820   4.52765
 Alpha virt. eigenvalues --    4.53820   4.55518   4.55602   4.56557   4.61586
 Alpha virt. eigenvalues --    4.65614   4.67688   4.68216   4.68649   4.72823
 Alpha virt. eigenvalues --    4.73961   4.76081   4.77947   4.83377   4.84738
 Alpha virt. eigenvalues --    4.91531   4.93914   4.97948   5.00006   5.04727
 Alpha virt. eigenvalues --    5.06405   5.08089   5.15367   5.17825   5.18271
 Alpha virt. eigenvalues --    5.19668   5.22314   5.25273   5.27170   5.28030
 Alpha virt. eigenvalues --    5.31416   5.36697   5.38706   5.42147   5.48196
 Alpha virt. eigenvalues --    5.54800   5.58523   5.60729   5.65031   5.73240
 Alpha virt. eigenvalues --    5.75911   5.92580   6.03984   6.09299   6.33914
 Alpha virt. eigenvalues --    6.36694   6.38965   6.45623   6.52317   6.59906
 Alpha virt. eigenvalues --    6.70304   6.78164   6.80840   6.83852   7.06352
 Alpha virt. eigenvalues --    7.07583   7.12335   7.23898   7.85306  22.03180
 Alpha virt. eigenvalues --   22.53415  22.69953  22.75626  22.78237  22.85177
 Alpha virt. eigenvalues --   22.94349  22.94680  22.96268  23.08340  23.24352
 Alpha virt. eigenvalues --   23.42955  23.44072  23.98726  44.08748  44.20814
          Condensed to atoms (all electrons):
               1          2          3          4          5          6
     1  C    4.963865   0.408270  -0.014235  -0.060739   0.029587   0.439369
     2  C    0.408270   5.333483   0.275808  -0.096771  -0.162811   0.028776
     3  C   -0.014235   0.275808   5.481892   0.496868  -0.093514  -0.060913
     4  C   -0.060739  -0.096771   0.496868   5.431430   0.285462  -0.015357
     5  C    0.029587  -0.162811  -0.093514   0.285462   5.334845   0.409344
     6  C    0.439369   0.028776  -0.060913  -0.015357   0.409344   4.963490
     7  H    0.419902  -0.035595   0.005416   0.000455   0.005271  -0.034345
     8  H   -0.029080   0.424292  -0.047157   0.009123  -0.002116   0.005322
     9  H    0.005337  -0.002119   0.009326  -0.046817   0.423863  -0.028900
    10  H   -0.034270   0.005282   0.000392   0.005397  -0.035655   0.420005
    11  C   -0.008757   0.023393   0.051690   0.195578  -0.139287   0.017520
    12  O    0.000660  -0.000414   0.000454  -0.198362   0.049648   0.000304
    13  C    0.017224  -0.130367   0.164518   0.052426   0.021260  -0.008121
    14  C    0.003537  -0.007246  -0.151312   0.002274   0.070923  -0.005820
    15  C   -0.005778   0.071975  -0.013378  -0.146839  -0.006591   0.003494
    16  C   -0.000117   0.001819  -0.004035   0.064126  -0.011113   0.000151
    17  C    0.000128  -0.010457   0.073846  -0.005925   0.001791  -0.000099
    18  C   -0.000005  -0.000057   0.002930  -0.003753   0.000008   0.000003
    19  H    0.000001  -0.000005  -0.000292   0.004407  -0.000332  -0.000001
    20  C    0.000003   0.000132  -0.006043   0.002981  -0.000071  -0.000003
    21  H   -0.000003  -0.000370   0.004559  -0.000373  -0.000010   0.000001
    22  H    0.000000   0.000002  -0.000019   0.000005   0.000000   0.000000
    23  Br   0.000000   0.000000  -0.000010   0.000067  -0.000003   0.000000
    24  O    0.000361   0.050506  -0.202179  -0.000114  -0.000360   0.000639
               7          8          9         10         11         12
     1  C    0.419902  -0.029080   0.005337  -0.034270  -0.008757   0.000660
     2  C   -0.035595   0.424292  -0.002119   0.005282   0.023393  -0.000414
     3  C    0.005416  -0.047157   0.009326   0.000392   0.051690   0.000454
     4  C    0.000455   0.009123  -0.046817   0.005397   0.195578  -0.198362
     5  C    0.005271  -0.002116   0.423863  -0.035655  -0.139287   0.049648
     6  C   -0.034345   0.005322  -0.028900   0.420005   0.017520   0.000304
     7  H    0.468203  -0.002969  -0.000158  -0.003507   0.000092   0.000001
     8  H   -0.002969   0.463914   0.000044  -0.000159   0.000919   0.000008
     9  H   -0.000158   0.000044   0.463799  -0.002958  -0.021193   0.018962
    10  H   -0.003507  -0.000159  -0.002958   0.468236  -0.000243  -0.000104
    11  C    0.000092   0.000919  -0.021193  -0.000243   4.961113   0.721847
    12  O    0.000001   0.000008   0.018962  -0.000104   0.721847   7.903721
    13  C   -0.000286  -0.021039   0.000875   0.000088  -0.132530  -0.005263
    14  C    0.000008  -0.000362   0.004341  -0.000032   0.122077  -0.207122
    15  C   -0.000033   0.004530  -0.000375   0.000009   0.054834  -0.000243
    16  C    0.000000  -0.000012  -0.000400   0.000002  -0.102772   0.056983
    17  C    0.000002  -0.000376  -0.000011   0.000000   0.017064  -0.000622
    18  C    0.000000   0.000002  -0.000005   0.000000   0.005787   0.001468
    19  H    0.000000   0.000000  -0.000042   0.000000  -0.014292   0.020159
    20  C    0.000000  -0.000004   0.000001   0.000000  -0.003260   0.000774
    21  H    0.000000  -0.000042   0.000000   0.000000   0.000904   0.000008
    22  H    0.000000   0.000000   0.000000   0.000000   0.000192   0.000001
    23  Br   0.000000   0.000000   0.000000   0.000000  -0.001744   0.000055
    24  O   -0.000110   0.018960   0.000008   0.000001  -0.005175   0.000005
              13         14         15         16         17         18
     1  C    0.017224   0.003537  -0.005778  -0.000117   0.000128  -0.000005
     2  C   -0.130367  -0.007246   0.071975   0.001819  -0.010457  -0.000057
     3  C    0.164518  -0.151312  -0.013378  -0.004035   0.073846   0.002930
     4  C    0.052426   0.002274  -0.146839   0.064126  -0.005925  -0.003753
     5  C    0.021260   0.070923  -0.006591  -0.011113   0.001791   0.000008
     6  C   -0.008121  -0.005820   0.003494   0.000151  -0.000099   0.000003
     7  H   -0.000286   0.000008  -0.000033   0.000000   0.000002   0.000000
     8  H   -0.021039  -0.000362   0.004530  -0.000012  -0.000376   0.000002
     9  H    0.000875   0.004341  -0.000375  -0.000400  -0.000011  -0.000005
    10  H    0.000088  -0.000032   0.000009   0.000002   0.000000   0.000000
    11  C   -0.132530   0.122077   0.054834  -0.102772   0.017064   0.005787
    12  O   -0.005263  -0.207122  -0.000243   0.056983  -0.000622   0.001468
    13  C    4.973920   0.053680   0.155378   0.021924  -0.131521  -0.007651
    14  C    0.053680   5.556591   0.517697   0.147667  -0.069279   0.037862
    15  C    0.155378   0.517697   5.489325  -0.083203   0.236467  -0.070545
    16  C    0.021924   0.147667  -0.083203   5.602739  -0.200237   0.310555
    17  C   -0.131521  -0.069279   0.236467  -0.200237   5.406886   0.084120
    18  C   -0.007651   0.037862  -0.070545   0.310555   0.084120   4.914143
    19  H    0.000800  -0.042407   0.007998   0.416034  -0.004485  -0.038143
    20  C    0.016952  -0.090999   0.014322   0.071552   0.316899   0.349915
    21  H   -0.020279   0.007887  -0.043776  -0.001200   0.419240   0.003636
    22  H   -0.000053  -0.001547   0.005535   0.013678  -0.032694  -0.048362
    23  Br  -0.000014   0.017696  -0.002376  -0.104848   0.020366   0.382233
    24  O    0.730581  -0.000920  -0.205303  -0.000212   0.053168   0.000547
              19         20         21         22         23         24
     1  C    0.000001   0.000003  -0.000003   0.000000   0.000000   0.000361
     2  C   -0.000005   0.000132  -0.000370   0.000002   0.000000   0.050506
     3  C   -0.000292  -0.006043   0.004559  -0.000019  -0.000010  -0.202179
     4  C    0.004407   0.002981  -0.000373   0.000005   0.000067  -0.000114
     5  C   -0.000332  -0.000071  -0.000010   0.000000  -0.000003  -0.000360
     6  C   -0.000001  -0.000003   0.000001   0.000000   0.000000   0.000639
     7  H    0.000000   0.000000   0.000000   0.000000   0.000000  -0.000110
     8  H    0.000000  -0.000004  -0.000042   0.000000   0.000000   0.018960
     9  H   -0.000042   0.000001   0.000000   0.000000   0.000000   0.000008
    10  H    0.000000   0.000000   0.000000   0.000000   0.000000   0.000001
    11  C   -0.014292  -0.003260   0.000904   0.000192  -0.001744  -0.005175
    12  O    0.020159   0.000774   0.000008   0.000001   0.000055   0.000005
    13  C    0.000800   0.016952  -0.020279  -0.000053  -0.000014   0.730581
    14  C   -0.042407  -0.090999   0.007887  -0.001547   0.017696  -0.000920
    15  C    0.007998   0.014322  -0.043776   0.005535  -0.002376  -0.205303
    16  C    0.416034   0.071552  -0.001200   0.013678  -0.104848  -0.000212
    17  C   -0.004485   0.316899   0.419240  -0.032694   0.020366   0.053168
    18  C   -0.038143   0.349915   0.003636  -0.048362   0.382233   0.000547
    19  H    0.450221   0.011961   0.000046   0.000044  -0.005274   0.000008
    20  C    0.011961   5.155907  -0.025826   0.421162  -0.098607   0.000902
    21  H    0.000046  -0.025826   0.457558  -0.002393  -0.000202   0.019319
    22  H    0.000044   0.421162  -0.002393   0.459597  -0.006775  -0.000101
    23  Br  -0.005274  -0.098607  -0.000202  -0.006775  34.886398   0.000000
    24  O    0.000008   0.000902   0.019319  -0.000101   0.000000   7.904796
 Mulliken charges:
               1
     1  C   -0.135260
     2  C   -0.177527
     3  C    0.025389
     4  C    0.024452
     5  C   -0.180138
     6  C   -0.134860
     7  H    0.177650
     8  H    0.176202
     9  H    0.176419
    10  H    0.177517
    11  C    0.256241
    12  O   -0.362927
    13  C    0.247499
    14  C    0.034803
    15  C    0.016875
    16  C   -0.199082
    17  C   -0.174272
    18  C    0.075313
    19  H    0.193596
    20  C   -0.138649
    21  H    0.181316
    22  H    0.191730
    23  Br  -0.086963
    24  O   -0.365325
 Sum of Mulliken charges =   0.00000
 Mulliken charges with hydrogens summed into heavy atoms:
               1
     1  C    0.042391
     2  C   -0.001324
     3  C    0.025389
     4  C    0.024452
     5  C   -0.003719
     6  C    0.042657
    11  C    0.256241
    12  O   -0.362927
    13  C    0.247499
    14  C    0.034803
    15  C    0.016875
    16  C   -0.005486
    17  C    0.007044
    18  C    0.075313
    20  C    0.053081
    23  Br  -0.086963
    24  O   -0.365325
 Electronic spatial extent (au):  <R**2>=           6223.0056
 Charge=              0.0000 electrons
 Dipole moment (field-independent basis, Debye):
    X=              2.3092    Y=              0.5285    Z=              0.0003  Tot=              2.3689
 Quadrupole moment (field-independent basis, Debye-Ang):
   XX=            -85.4305   YY=           -116.8274   ZZ=           -111.7731
   XY=            -10.2755   XZ=              0.0013   YZ=              0.0035
 Traceless Quadrupole moment (field-independent basis, Debye-Ang):
   XX=             19.2465   YY=            -12.1504   ZZ=             -7.0961
   XY=            -10.2755   XZ=              0.0013   YZ=              0.0035
 Octapole moment (field-independent basis, Debye-Ang**2):
  XXX=             20.2952  YYY=            -14.1859  ZZZ=             -0.0059  XYY=            -61.9455
  XXY=            -23.4097  XXZ=             -0.0031  XZZ=            -49.6877  YZZ=             -4.3479
  YYZ=             -0.0023  XYZ=              0.0060
 Hexadecapole moment (field-independent basis, Debye-Ang**3):
 XXXX=          -5034.1821 YYYY=          -1440.3538 ZZZZ=           -124.1910 XXXY=            -31.1864
 XXXZ=             -0.0922 YYYX=            -51.2253 YYYZ=              0.0592 ZZZX=             -0.0921
 ZZZY=              0.0378 XXYY=          -1131.8333 XXZZ=          -1089.2217 YYZZ=           -251.1979
 XXYZ=              0.0143 YYXZ=             -0.0178 ZZXY=             28.8912
 N-N= 1.372398746532D+03 E-N=-1.049916928961D+04  KE= 3.255515252035D+03
 No NMR shielding tensors so no spin-rotation constants.
 Leave Link  601 at Thu Jan 09 19:21:46 2020, MaxMem=   134217728 cpu:         3.0
 (Enter E:\Gaussian\G09W\l9999.exe)
 1|1|UNPC-DESKTOP-K4OTQA5|SP|RM062X|Gen|C14H7Br1O2|������|09-Jan-2020|0
 ||#p m062x/gen scrf=(solvent=acetonitrile) guess=save geom=connectivit
 y empiricaldispersion=gd3||2-BrAQ ground state energy||0,1|C,0,-1.6025
 6414,0.89743588,0.|C,0,-0.56729614,1.82558288,-0.000034|C,0,0.76275486
 ,1.39821888,-0.000144|C,0,1.05065786,0.02032488,-0.000174|C,0,0.003658
 86,-0.90496612,-0.00016|C,0,-1.31670414,-0.46986912,-0.000072|H,0,-2.6
 3214114,1.23652188,0.000074|H,0,-0.77526314,2.88811488,-0.000006|H,0,0
 .23886186,-1.96179812,-0.000192|H,0,-2.12406614,-1.19312912,-0.000049|
 C,0,2.45108986,-0.47419412,-0.000159|O,0,2.70830386,-1.67005812,-0.000
 417|C,0,1.84868286,2.41338388,-0.0003|C,0,3.53916686,0.54472788,-0.000
 122|C,0,3.25091486,1.91971788,-0.000095|C,0,4.86465886,0.10675188,-0.0
 00057|C,0,4.30049286,2.84201088,0.00006|C,0,5.88772386,1.04408388,0.00
 0074|H,0,5.07160086,-0.95487212,-0.000086|C,0,5.62137786,2.41395388,0.
 000145|H,0,4.07169186,3.90014288,0.000085|H,0,6.43148586,3.13188988,0.
 000255|Br,0,7.70342386,0.44632188,0.000187|O,0,1.60110386,3.61224988,0
 .000261||Version=IA32W-G09RevD.01|State=1-A|HF=-3262.3592473|RMSD=4.01
 4e-009|Dipole=-0.9084952,0.2079375,-0.000103|Quadrupole=14.3093024,-9.
 0335211,-5.2757813,7.6395726,0.0009929,-0.0026236|PG=C01 [X(C14H7Br1O2
 )]||@


 THERE IS SOMETHING FASCINATING ABOUT SCIENCE.
 ONE GETS SUCH WHOLESALE CONJECTURE OUT OF SUCH TRIFLING INVESTMENTS.

                                                       -- MARK TWAIN
 Job cpu time:       0 days  3 hours 41 minutes  3.0 seconds.
 File lengths (MBytes):  RWF=    257 Int=      0 D2E=      0 Chk=     13 Scr=      1
 Normal termination of Gaussian 09 at Thu Jan 09 19:21:46 2020.
