# Supplementary material for: 2-Bromoanthraquinone as a highly efficient photocatalyst for the oxidation of sec-aromatic alcohols: experimental and DFT study
Source: Royal Society of Chemistry journal article supplement (doi:10.1039/d0ra06414a), 2020-01-01
Supplement: d0ra06414a11.out [file d0ra06414a11.out]

 Entering Link 1 = E:\Gaussian\G09W\l1.exe PID=     62080.
  
 Copyright (c) 1988,1990,1992,1993,1995,1998,2003,2009,2013,
            Gaussian, Inc.  All Rights Reserved.
  
 This is part of the Gaussian(R) 09 program.  It is based on
 the Gaussian(R) 03 system (copyright 2003, Gaussian, Inc.),
 the Gaussian(R) 98 system (copyright 1998, Gaussian, Inc.),
 the Gaussian(R) 94 system (copyright 1995, Gaussian, Inc.),
 the Gaussian 92(TM) system (copyright 1992, Gaussian, Inc.),
 the Gaussian 90(TM) system (copyright 1990, Gaussian, Inc.),
 the Gaussian 88(TM) system (copyright 1988, Gaussian, Inc.),
 the Gaussian 86(TM) system (copyright 1986, Carnegie Mellon
 University), and the Gaussian 82(TM) system (copyright 1983,
 Carnegie Mellon University). Gaussian is a federally registered
 trademark of Gaussian, Inc.
  
 This software contains proprietary and confidential information,
 including trade secrets, belonging to Gaussian, Inc.
  
 This software is provided under written license and may be
 used, copied, transmitted, or stored only in accord with that
 written license.
  
 The following legend is applicable only to US Government
 contracts under FAR:
  
                    RESTRICTED RIGHTS LEGEND
  
 Use, reproduction and disclosure by the US Government is
 subject to restrictions as set forth in subparagraphs (a)
 and (c) of the Commercial Computer Software - Restricted
 Rights clause in FAR 52.227-19.
  
 Gaussian, Inc.
 340 Quinnipiac St., Bldg. 40, Wallingford CT 06492
  
  
 ---------------------------------------------------------------
 Warning -- This program may not be used in any manner that
 competes with the business of Gaussian, Inc. or will provide
 assistance to any competitor of Gaussian, Inc.  The licensee
 of this program is prohibited from giving any competitor of
 Gaussian, Inc. access to this program.  By using this program,
 the user acknowledges that Gaussian, Inc. is engaged in the
 business of creating and licensing software in the field of
 computational chemistry and represents and warrants to the
 licensee that it is not a competitor of Gaussian, Inc. and that
 it will not use this program in any manner prohibited above.
 ---------------------------------------------------------------
  

 Cite this work as:
 Gaussian 09, Revision D.01,
 M. J. Frisch, G. W. Trucks, H. B. Schlegel, G. E. Scuseria, 
 M. A. Robb, J. R. Cheeseman, G. Scalmani, V. Barone, B. Mennucci, 
 G. A. Petersson, H. Nakatsuji, M. Caricato, X. Li, H. P. Hratchian, 
 A. F. Izmaylov, J. Bloino, G. Zheng, J. L. Sonnenberg, M. Hada, 
 M. Ehara, K. Toyota, R. Fukuda, J. Hasegawa, M. Ishida, T. Nakajima, 
 Y. Honda, O. Kitao, H. Nakai, T. Vreven, J. A. Montgomery, Jr., 
 J. E. Peralta, F. Ogliaro, M. Bearpark, J. J. Heyd, E. Brothers, 
 K. N. Kudin, V. N. Staroverov, T. Keith, R. Kobayashi, J. Normand, 
 K. Raghavachari, A. Rendell, J. C. Burant, S. S. Iyengar, J. Tomasi, 
 M. Cossi, N. Rega, J. M. Millam, M. Klene, J. E. Knox, J. B. Cross, 
 V. Bakken, C. Adamo, J. Jaramillo, R. Gomperts, R. E. Stratmann, 
 O. Yazyev, A. J. Austin, R. Cammi, C. Pomelli, J. W. Ochterski, 
 R. L. Martin, K. Morokuma, V. G. Zakrzewski, G. A. Voth, 
 P. Salvador, J. J. Dannenberg, S. Dapprich, A. D. Daniels, 
 O. Farkas, J. B. Foresman, J. V. Ortiz, J. Cioslowski, 
 and D. J. Fox, Gaussian, Inc., Wallingford CT, 2013.
 
 ******************************************
 Gaussian 09:  IA32W-G09RevD.01 24-Apr-2013
                08-Jan-2020 
 ******************************************
 %nproc=2
 Will use up to    2 processors via shared memory.
 %mem=1GB
 %chk=E:\Gaussian file\2-BrAQ ground state opt.chk
 ----------------------------------------------------------------------
 #p opt b3lyp/6-311+g(d) scrf=(solvent=acetonitrile) guess=save geom=co
 nnectivity empiricaldispersion=gd3bj
 ----------------------------------------------------------------------
 1/14=-1,18=20,19=15,26=3,38=1,57=2/1,3;
 2/9=110,12=2,17=6,18=5,40=1/2;
 3/5=4,6=6,7=11,11=2,16=1,25=1,30=1,70=2201,71=1,72=2,74=-5,124=41/1,2,3;
 4//1;
 5/5=2,38=5,53=2/2;
 6/7=2,8=2,9=2,10=2,28=1/1;
 7//1,2,3,16;
 1/14=-1,18=20,19=15,26=3/3(2);
 2/9=110/2;
 99//99;
 2/9=110/2;
 3/5=4,6=6,7=11,11=2,16=1,25=1,30=1,70=2205,71=1,72=2,74=-5,124=41/1,2,3;
 4/5=5,16=3,69=1/1;
 5/5=2,38=5,53=2/2;
 7//1,2,3,16;
 1/14=-1,18=20,19=15,26=3/3(-5);
 2/9=110/2;
 6/7=2,8=2,9=2,10=2,19=2,28=1/1;
 99/9=1/99;
 Leave Link    1 at Wed Jan 08 20:10:13 2020, MaxMem=   134217728 cpu:         0.0
 (Enter E:\Gaussian\G09W\l101.exe)
 -----------------------
 2-BrAQ ground state opt
 -----------------------
 Symbolic Z-matrix:
 Charge =  0 Multiplicity = 1
 C                    -2.79915   0.76923   0. 
 C                    -1.76399   1.69769   0.00012 
 C                    -0.43335   1.27055   0.0001 
 C                    -0.14508  -0.10772  -0.00007 
 C                    -1.19248  -1.03332  -0.00019 
 C                    -2.51301  -0.59826  -0.00015 
 H                    -3.82903   1.10852   0.00003 
 H                    -1.96967   2.76118   0.00026 
 H                    -0.95459  -2.09006  -0.00032 
 H                    -3.32037  -1.32205  -0.00025 
 C                     1.25807  -0.60381  -0.00018 
 O                     1.51524  -1.79792   0.0005 
 C                     0.65398   2.28859   0.0003 
 C                     2.34758   0.41804  -0.00001 
 C                     2.05914   1.79319   0.00015 
 C                     3.67378  -0.01981  -0.00007 
 C                     3.10908   2.71549   0.00024 
 C                     4.69748   0.91712   0.00002 
 H                     3.8771   -1.08259  -0.00021 
 C                     4.43028   2.28717   0.00017 
 H                     2.87797   3.77361   0.00037 
 H                     5.2396    3.00643   0.00024 
 Br                    6.51593   0.31833  -0.00008 
 O                     0.407     3.48567  -0.00044 
 
 NAtoms=     24 NQM=       24 NQMF=       0 NMMI=      0 NMMIF=      0
                NMic=       0 NMicF=      0.
                    Isotopes and Nuclear Properties:
 (Nuclear quadrupole moments (NQMom) in fm**2, nuclear magnetic moments (NMagM)
  in nuclear magnetons)

  Atom         1           2           3           4           5           6           7           8           9          10
 IAtWgt=          12          12          12          12          12          12           1           1           1           1
 AtmWgt=  12.0000000  12.0000000  12.0000000  12.0000000  12.0000000  12.0000000   1.0078250   1.0078250   1.0078250   1.0078250
 NucSpn=           0           0           0           0           0           0           1           1           1           1
 AtZEff=   0.0000000   0.0000000   0.0000000   0.0000000   0.0000000   0.0000000   0.0000000   0.0000000   0.0000000   0.0000000
 NQMom=    0.0000000   0.0000000   0.0000000   0.0000000   0.0000000   0.0000000   0.0000000   0.0000000   0.0000000   0.0000000
 NMagM=    0.0000000   0.0000000   0.0000000   0.0000000   0.0000000   0.0000000   2.7928460   2.7928460   2.7928460   2.7928460
 AtZNuc=   6.0000000   6.0000000   6.0000000   6.0000000   6.0000000   6.0000000   1.0000000   1.0000000   1.0000000   1.0000000

  Atom        11          12          13          14          15          16          17          18          19          20
 IAtWgt=          12          16          12          12          12          12          12          12           1          12
 AtmWgt=  12.0000000  15.9949146  12.0000000  12.0000000  12.0000000  12.0000000  12.0000000  12.0000000   1.0078250  12.0000000
 NucSpn=           0           0           0           0           0           0           0           0           1           0
 AtZEff=   0.0000000   0.0000000   0.0000000   0.0000000   0.0000000   0.0000000   0.0000000   0.0000000   0.0000000   0.0000000
 NQMom=    0.0000000   0.0000000   0.0000000   0.0000000   0.0000000   0.0000000   0.0000000   0.0000000   0.0000000   0.0000000
 NMagM=    0.0000000   0.0000000   0.0000000   0.0000000   0.0000000   0.0000000   0.0000000   0.0000000   2.7928460   0.0000000
 AtZNuc=   6.0000000   8.0000000   6.0000000   6.0000000   6.0000000   6.0000000   6.0000000   6.0000000   1.0000000   6.0000000

  Atom        21          22          23          24
 IAtWgt=           1           1          79          16
 AtmWgt=   1.0078250   1.0078250  78.9183361  15.9949146
 NucSpn=           1           1           3           0
 AtZEff=   0.0000000   0.0000000   0.0000000   0.0000000
 NQMom=    0.0000000   0.0000000  31.3000000   0.0000000
 NMagM=    2.7928460   2.7928460   2.1063990   0.0000000
 AtZNuc=   1.0000000   1.0000000  35.0000000   8.0000000
 Leave Link  101 at Wed Jan 08 20:10:13 2020, MaxMem=   134217728 cpu:         0.0
 (Enter E:\Gaussian\G09W\l103.exe)

 GradGradGradGradGradGradGradGradGradGradGradGradGradGradGradGradGradGrad
 Berny optimization.
 Initialization pass.
                           ----------------------------
                           !    Initial Parameters    !
                           ! (Angstroms and Degrees)  !
 --------------------------                            --------------------------
 ! Name  Definition              Value          Derivative Info.                !
 --------------------------------------------------------------------------------
 ! R1    R(1,2)                  1.3905         estimate D2E/DX2                !
 ! R2    R(1,6)                  1.3971         estimate D2E/DX2                !
 ! R3    R(1,7)                  1.0843         estimate D2E/DX2                !
 ! R4    R(2,3)                  1.3975         estimate D2E/DX2                !
 ! R5    R(2,8)                  1.0832         estimate D2E/DX2                !
 ! R6    R(3,4)                  1.4081         estimate D2E/DX2                !
 ! R7    R(3,13)                 1.4895         estimate D2E/DX2                !
 ! R8    R(4,5)                  1.3978         estimate D2E/DX2                !
 ! R9    R(4,11)                 1.4883         estimate D2E/DX2                !
 ! R10   R(5,6)                  1.3903         estimate D2E/DX2                !
 ! R11   R(5,9)                  1.0832         estimate D2E/DX2                !
 ! R12   R(6,10)                 1.0843         estimate D2E/DX2                !
 ! R13   R(11,12)                1.2215         estimate D2E/DX2                !
 ! R14   R(11,14)                1.4937         estimate D2E/DX2                !
 ! R15   R(13,15)                1.4899         estimate D2E/DX2                !
 ! R16   R(13,24)                1.2223         estimate D2E/DX2                !
 ! R17   R(14,15)                1.4051         estimate D2E/DX2                !
 ! R18   R(14,16)                1.3966         estimate D2E/DX2                !
 ! R19   R(15,17)                1.3975         estimate D2E/DX2                !
 ! R20   R(16,18)                1.3877         estimate D2E/DX2                !
 ! R21   R(16,19)                1.082          estimate D2E/DX2                !
 ! R22   R(17,20)                1.3889         estimate D2E/DX2                !
 ! R23   R(17,21)                1.0831         estimate D2E/DX2                !
 ! R24   R(18,20)                1.3959         estimate D2E/DX2                !
 ! R25   R(18,23)                1.9145         estimate D2E/DX2                !
 ! R26   R(20,22)                1.0827         estimate D2E/DX2                !
 ! A1    A(2,1,6)              120.0716         estimate D2E/DX2                !
 ! A2    A(2,1,7)              119.8762         estimate D2E/DX2                !
 ! A3    A(6,1,7)              120.0522         estimate D2E/DX2                !
 ! A4    A(1,2,3)              120.3135         estimate D2E/DX2                !
 ! A5    A(1,2,8)              120.9437         estimate D2E/DX2                !
 ! A6    A(3,2,8)              118.7427         estimate D2E/DX2                !
 ! A7    A(2,3,4)              119.61           estimate D2E/DX2                !
 ! A8    A(2,3,13)             119.0886         estimate D2E/DX2                !
 ! A9    A(4,3,13)             121.3015         estimate D2E/DX2                !
 ! A10   A(3,4,5)              119.6541         estimate D2E/DX2                !
 ! A11   A(3,4,11)             121.2846         estimate D2E/DX2                !
 ! A12   A(5,4,11)             119.0614         estimate D2E/DX2                !
 ! A13   A(4,5,6)              120.2978         estimate D2E/DX2                !
 ! A14   A(4,5,9)              118.781          estimate D2E/DX2                !
 ! A15   A(6,5,9)              120.9213         estimate D2E/DX2                !
 ! A16   A(1,6,5)              120.0531         estimate D2E/DX2                !
 ! A17   A(1,6,10)             120.0576         estimate D2E/DX2                !
 ! A18   A(5,6,10)             119.8893         estimate D2E/DX2                !
 ! A19   A(4,11,12)            121.6253         estimate D2E/DX2                !
 ! A20   A(4,11,14)            117.364          estimate D2E/DX2                !
 ! A21   A(12,11,14)           121.0107         estimate D2E/DX2                !
 ! A22   A(3,13,15)            117.4646         estimate D2E/DX2                !
 ! A23   A(3,13,24)            121.4572         estimate D2E/DX2                !
 ! A24   A(15,13,24)           121.0782         estimate D2E/DX2                !
 ! A25   A(11,14,15)           121.3184         estimate D2E/DX2                !
 ! A26   A(11,14,16)           118.5644         estimate D2E/DX2                !
 ! A27   A(15,14,16)           120.1171         estimate D2E/DX2                !
 ! A28   A(13,15,14)           121.2669         estimate D2E/DX2                !
 ! A29   A(13,15,17)           119.2824         estimate D2E/DX2                !
 ! A30   A(14,15,17)           119.4507         estimate D2E/DX2                !
 ! A31   A(14,16,18)           119.2632         estimate D2E/DX2                !
 ! A32   A(14,16,19)           119.1012         estimate D2E/DX2                !
 ! A33   A(18,16,19)           121.6356         estimate D2E/DX2                !
 ! A34   A(15,17,20)           120.7409         estimate D2E/DX2                !
 ! A35   A(15,17,21)           118.9765         estimate D2E/DX2                !
 ! A36   A(20,17,21)           120.2826         estimate D2E/DX2                !
 ! A37   A(16,18,20)           121.4299         estimate D2E/DX2                !
 ! A38   A(16,18,23)           119.3081         estimate D2E/DX2                !
 ! A39   A(20,18,23)           119.2619         estimate D2E/DX2                !
 ! A40   A(17,20,18)           118.9981         estimate D2E/DX2                !
 ! A41   A(17,20,22)           120.4098         estimate D2E/DX2                !
 ! A42   A(18,20,22)           120.5921         estimate D2E/DX2                !
 ! D1    D(6,1,2,3)              0.0            estimate D2E/DX2                !
 ! D2    D(6,1,2,8)           -179.9991         estimate D2E/DX2                !
 ! D3    D(7,1,2,3)            179.9997         estimate D2E/DX2                !
 ! D4    D(7,1,2,8)              0.0005         estimate D2E/DX2                !
 ! D5    D(2,1,6,5)             -0.0004         estimate D2E/DX2                !
 ! D6    D(2,1,6,10)          -180.0            estimate D2E/DX2                !
 ! D7    D(7,1,6,5)            180.0            estimate D2E/DX2                !
 ! D8    D(7,1,6,10)             0.0004         estimate D2E/DX2                !
 ! D9    D(1,2,3,4)              0.0007         estimate D2E/DX2                !
 ! D10   D(1,2,3,13)          -179.9971         estimate D2E/DX2                !
 ! D11   D(8,2,3,4)            179.9998         estimate D2E/DX2                !
 ! D12   D(8,2,3,13)             0.002          estimate D2E/DX2                !
 ! D13   D(2,3,4,5)             -0.001          estimate D2E/DX2                !
 ! D14   D(2,3,4,11)           179.9967         estimate D2E/DX2                !
 ! D15   D(13,3,4,5)           179.9967         estimate D2E/DX2                !
 ! D16   D(13,3,4,11)           -0.0056         estimate D2E/DX2                !
 ! D17   D(2,3,13,15)         -179.9955         estimate D2E/DX2                !
 ! D18   D(2,3,13,24)           -0.0505         estimate D2E/DX2                !
 ! D19   D(4,3,13,15)            0.0068         estimate D2E/DX2                !
 ! D20   D(4,3,13,24)          179.9517         estimate D2E/DX2                !
 ! D21   D(3,4,5,6)              0.0007         estimate D2E/DX2                !
 ! D22   D(3,4,5,9)            179.9998         estimate D2E/DX2                !
 ! D23   D(11,4,5,6)          -179.9971         estimate D2E/DX2                !
 ! D24   D(11,4,5,9)             0.002          estimate D2E/DX2                !
 ! D25   D(3,4,11,12)          179.9546         estimate D2E/DX2                !
 ! D26   D(3,4,11,14)            0.0039         estimate D2E/DX2                !
 ! D27   D(5,4,11,12)           -0.0476         estimate D2E/DX2                !
 ! D28   D(5,4,11,14)         -179.9983         estimate D2E/DX2                !
 ! D29   D(4,5,6,1)              0.0            estimate D2E/DX2                !
 ! D30   D(4,5,6,10)           179.9996         estimate D2E/DX2                !
 ! D31   D(9,5,6,1)           -179.9991         estimate D2E/DX2                !
 ! D32   D(9,5,6,10)             0.0005         estimate D2E/DX2                !
 ! D33   D(4,11,14,15)          -0.004          estimate D2E/DX2                !
 ! D34   D(4,11,14,16)         179.9983         estimate D2E/DX2                !
 ! D35   D(12,11,14,15)       -179.955          estimate D2E/DX2                !
 ! D36   D(12,11,14,16)          0.0473         estimate D2E/DX2                !
 ! D37   D(3,13,15,14)          -0.0068         estimate D2E/DX2                !
 ! D38   D(3,13,15,17)         179.9955         estimate D2E/DX2                !
 ! D39   D(24,13,15,14)       -179.952          estimate D2E/DX2                !
 ! D40   D(24,13,15,17)          0.0503         estimate D2E/DX2                !
 ! D41   D(11,14,15,13)          0.0056         estimate D2E/DX2                !
 ! D42   D(11,14,15,17)       -179.9967         estimate D2E/DX2                !
 ! D43   D(16,14,15,13)       -179.9967         estimate D2E/DX2                !
 ! D44   D(16,14,15,17)          0.0009         estimate D2E/DX2                !
 ! D45   D(11,14,16,18)        179.9971         estimate D2E/DX2                !
 ! D46   D(11,14,16,19)         -0.002          estimate D2E/DX2                !
 ! D47   D(15,14,16,18)         -0.0006         estimate D2E/DX2                !
 ! D48   D(15,14,16,19)       -179.9998         estimate D2E/DX2                !
 ! D49   D(13,15,17,20)        179.9972         estimate D2E/DX2                !
 ! D50   D(13,15,17,21)         -0.002          estimate D2E/DX2                !
 ! D51   D(14,15,17,20)         -0.0006         estimate D2E/DX2                !
 ! D52   D(14,15,17,21)       -179.9997         estimate D2E/DX2                !
 ! D53   D(14,16,18,20)         -0.0001         estimate D2E/DX2                !
 ! D54   D(14,16,18,23)       -179.9996         estimate D2E/DX2                !
 ! D55   D(19,16,18,20)        179.999          estimate D2E/DX2                !
 ! D56   D(19,16,18,23)         -0.0005         estimate D2E/DX2                !
 ! D57   D(15,17,20,18)         -0.0001         estimate D2E/DX2                !
 ! D58   D(15,17,20,22)       -179.9997         estimate D2E/DX2                !
 ! D59   D(21,17,20,18)        179.999          estimate D2E/DX2                !
 ! D60   D(21,17,20,22)         -0.0005         estimate D2E/DX2                !
 ! D61   D(16,18,20,17)          0.0005         estimate D2E/DX2                !
 ! D62   D(16,18,20,22)       -180.0            estimate D2E/DX2                !
 ! D63   D(23,18,20,17)       -180.0            estimate D2E/DX2                !
 ! D64   D(23,18,20,22)         -0.0005         estimate D2E/DX2                !
 --------------------------------------------------------------------------------
 Trust Radius=3.00D-01 FncErr=1.00D-07 GrdErr=1.00D-06
 Number of steps in this run=    142 maximum allowed number of steps=    144.
 GradGradGradGradGradGradGradGradGradGradGradGradGradGradGradGradGradGrad

 Leave Link  103 at Wed Jan 08 20:10:14 2020, MaxMem=   134217728 cpu:         0.0
 (Enter E:\Gaussian\G09W\l202.exe)
                          Input orientation:                          
 ---------------------------------------------------------------------
 Center     Atomic      Atomic             Coordinates (Angstroms)
 Number     Number       Type             X           Y           Z
 ---------------------------------------------------------------------
      1          6           0       -2.799145    0.769231    0.000000
      2          6           0       -1.763991    1.697690    0.000123
      3          6           0       -0.433354    1.270555    0.000095
      4          6           0       -0.145083   -0.107722   -0.000073
      5          6           0       -1.192478   -1.033316   -0.000188
      6          6           0       -2.513007   -0.598258   -0.000152
      7          1           0       -3.829033    1.108517    0.000028
      8          1           0       -1.969674    2.761179    0.000256
      9          1           0       -0.954594   -2.090059   -0.000320
     10          1           0       -3.320372   -1.322050   -0.000248
     11          6           0        1.258072   -0.603813   -0.000181
     12          8           0        1.515243   -1.797915    0.000497
     13          6           0        0.653981    2.288591    0.000295
     14          6           0        2.347579    0.418041   -0.000013
     15          6           0        2.059136    1.793189    0.000154
     16          6           0        3.673781   -0.019810   -0.000074
     17          6           0        3.109079    2.715489    0.000238
     18          6           0        4.697482    0.917120    0.000019
     19          1           0        3.877100   -1.082586   -0.000207
     20          6           0        4.430278    2.287171    0.000170
     21          1           0        2.877975    3.773607    0.000371
     22          1           0        5.239599    3.006429    0.000241
     23         35           0        6.515933    0.318332   -0.000075
     24          8           0        0.407002    3.485669   -0.000437
 ---------------------------------------------------------------------
                    Distance matrix (angstroms):
                    1          2          3          4          5
     1  C    0.000000
     2  C    1.390532   0.000000
     3  C    2.418324   1.397512   0.000000
     4  C    2.795191   2.424949   1.408101   0.000000
     5  C    2.414654   2.790165   2.425715   1.397770   0.000000
     6  C    1.397105   2.415037   2.795965   2.418200   1.390350
     7  H    1.084336   2.147446   3.399543   3.879526   3.396891
     8  H    2.157749   1.083196   2.140617   3.399960   3.873271
     9  H    3.402632   3.873263   3.400797   2.141254   1.083187
    10  H    2.155257   3.397227   3.880267   3.399567   2.147394
    11  C    4.283253   3.798655   2.524713   1.488271   2.487904
    12  O    5.020377   4.792977   3.634906   2.369269   2.813604
    13  C    3.772603   2.489127   1.489528   2.526028   3.800589
    14  C    5.158692   4.306101   2.908671   2.547507   3.826022
    15  C    4.965016   3.824320   2.546694   2.910678   4.308378
    16  C    6.520840   5.702558   4.305067   3.819876   4.970681
    17  C    6.220533   4.978225   3.825790   4.308142   5.705868
    18  C    7.498086   6.508450   5.142995   4.949822   6.204501
    19  H    6.928310   6.289026   4.910935   4.138637   5.069817
    20  C    7.387063   6.222255   4.968745   5.164246   6.530009
    21  H    6.423081   5.085005   4.150924   4.919715   6.298817
    22  H    8.344247   7.124821   5.932593   6.220349   7.595469
    23  Br   9.325985   8.394032   7.014223   6.674628   7.826018
    24  O    4.202192   2.812486   2.369162   3.635555   4.793700
                    6          7          8          9         10
     6  C    0.000000
     7  H    2.155227   0.000000
     8  H    3.403091   2.487671   0.000000
     9  H    2.157341   4.300382   4.956299   0.000000
    10  H    1.084303   2.483222   4.300831   2.487317   0.000000
    11  C    3.771083   5.367561   4.662780   2.665486   4.634438
    12  O    4.203091   6.083472   5.738465   2.487055   4.858973
    13  C    4.285290   4.635730   2.665878   4.664771   5.369563
    14  C    4.965698   6.215086   4.912125   4.146675   5.929046
    15  C    5.159798   5.927842   4.143467   4.915504   6.216415
    16  C    6.213771   7.587183   6.291461   5.070285   7.114352
    17  C    6.526007   7.121780   5.078959   6.293388   7.592072
    18  C    7.368007   8.528663   6.917480   6.402272   8.324654
    19  H    6.408435   8.011580   6.997092   4.935612   7.201454
    20  C    7.518970   8.342988   6.417482   6.939524   8.549798
    21  H    6.940885   7.217109   4.952243   7.005081   8.024041
    22  H    8.549659   9.265104   7.213443   8.021360   9.592124
    23  Br   9.075345  10.375101   8.830234   7.849148   9.972149
    24  O    5.020449   4.857452   2.484648   5.739572   6.083377
                   11         12         13         14         15
    11  C    0.000000
    12  O    1.221481   0.000000
    13  C    2.954814   4.176279   0.000000
    14  C    1.493724   2.367117   2.523337   0.000000
    15  C    2.527315   3.632058   1.489927   1.405073   0.000000
    16  C    2.485299   2.796595   3.801040   1.396612   2.427765
    17  C    3.800525   4.786557   2.491937   2.420361   1.397504
    18  C    3.760689   4.183068   4.269758   2.402316   2.779994
    19  H    2.662430   2.467806   4.664047   2.142736   3.402216
    20  C    4.291932   5.018501   3.776297   2.798443   2.422051
    21  H    4.667536   5.735756   2.674214   3.397226   2.143024
    22  H    5.374607   6.078861   4.641464   3.881177   3.404012
    23  Br   5.338113   5.430046   6.184206   4.169546   4.694491
    24  O    4.177102   5.398561   1.222291   3.629901   2.365171
                   16         17         18         19         20
    16  C    0.000000
    17  C    2.792982   0.000000
    18  C    1.387733   2.399407   0.000000
    19  H    1.082050   3.874949   2.161446   0.000000
    20  C    2.427849   1.388893   1.395865   3.414860   0.000000
    21  H    3.875993   1.083062   3.386757   4.957909   2.149218
    22  H    3.407332   2.150293   2.158496   4.310040   1.082743
    23  Br   2.862196   4.165695   1.914500   2.987643   2.868150
    24  O    4.791683   2.809697   5.000566   5.736770   4.197993
                   21         22         23         24
    21  H    0.000000
    22  H    2.483109   0.000000
    23  Br   5.017336   2.975717   0.000000
    24  O    2.487693   4.856302   6.881211   0.000000
 Stoichiometry    C14H7BrO2
 Framework group  C1[X(C14H7BrO2)]
 Deg. of freedom    66
 Full point group                 C1      NOp   1
 Largest Abelian subgroup         C1      NOp   1
 Largest concise Abelian subgroup C1      NOp   1
                         Standard orientation:                         
 ---------------------------------------------------------------------
 Center     Atomic      Atomic             Coordinates (Angstroms)
 Number     Number       Type             X           Y           Z
 ---------------------------------------------------------------------
      1          6           0       -5.092459    0.053994   -0.000003
      2          6           0       -4.057305    0.982453    0.000120
      3          6           0       -2.726668    0.555318    0.000092
      4          6           0       -2.438397   -0.822959   -0.000076
      5          6           0       -3.485792   -1.748553   -0.000191
      6          6           0       -4.806321   -1.313495   -0.000155
      7          1           0       -6.122347    0.393280    0.000025
      8          1           0       -4.262988    2.045942    0.000253
      9          1           0       -3.247908   -2.805296   -0.000323
     10          1           0       -5.613686   -2.037287   -0.000251
     11          6           0       -1.035242   -1.319050   -0.000184
     12          8           0       -0.778071   -2.513152    0.000494
     13          6           0       -1.639333    1.573354    0.000292
     14          6           0        0.054265   -0.297196   -0.000016
     15          6           0       -0.234178    1.077952    0.000151
     16          6           0        1.380467   -0.735047   -0.000077
     17          6           0        0.815765    2.000252    0.000235
     18          6           0        2.404168    0.201883    0.000016
     19          1           0        1.583786   -1.797823   -0.000210
     20          6           0        2.136964    1.571934    0.000167
     21          1           0        0.584661    3.058370    0.000368
     22          1           0        2.946285    2.291192    0.000238
     23         35           0        4.222619   -0.396905   -0.000078
     24          8           0       -1.886312    2.770432   -0.000440
 ---------------------------------------------------------------------
 Rotational constants (GHZ):      1.0081118      0.1762127      0.1499945
 Leave Link  202 at Wed Jan 08 20:10:14 2020, MaxMem=   134217728 cpu:         0.0
 (Enter E:\Gaussian\G09W\l301.exe)
 Standard basis: 6-311+G(d) (5D, 7F)
 Ernie: Thresh=  0.10000D-02 Tol=  0.10000D-05 Strict=F.
 There are   440 symmetry adapted cartesian basis functions of A   symmetry.
 There are   421 symmetry adapted basis functions of A   symmetry.
   421 basis functions,   705 primitive gaussians,   440 cartesian basis functions
    71 alpha electrons       71 beta electrons
       nuclear repulsion energy      1371.3453073133 Hartrees.
 IExCor=  402 DFT=T Ex+Corr=B3LYP ExCW=0 ScaHFX=  0.200000
 ScaDFX=  0.800000  0.720000  1.000000  0.810000 ScalE2=  1.000000  1.000000
 IRadAn=      0 IRanWt=     -1 IRanGd=            0 ICorTp=0 IEmpDi=141
 NAtoms=   24 NActive=   24 NUniq=   24 SFac= 1.00D+00 NAtFMM=   60 NAOKFM=F Big=F
 Integral buffers will be    262144 words long.
 Raffenetti 2 integral format.
 Two-electron integral symmetry is turned on.
 R6Disp:  Grimme-D3(BJ) Dispersion energy=       -0.0618401726 Hartrees.
 Nuclear repulsion after empirical dispersion term =     1371.2834671408 Hartrees.
 ------------------------------------------------------------------------------
 Polarizable Continuum Model (PCM)
 =================================
 Model                : PCM (using non-symmetric T matrix).
 Atomic radii         : UFF (Universal Force Field).
 Polarization charges : Total charges.
 Charge compensation  : None.
 Solution method      : On-the-fly selection.
 Cavity type          : Scaled VdW (van der Waals Surface) (Alpha=1.100).
 Cavity algorithm     : GePol (No added spheres)
                        Default sphere list used, NSphG=   24.
                        Lebedev-Laikov grids with approx.  5.0 points / Ang**2.
                        Smoothing algorithm: Karplus/York (Gamma=1.0000).
                        Polarization charges: spherical gaussians, with
                                              point-specific exponents (IZeta= 3).
                        Self-potential: point-specific (ISelfS= 7).
                        Self-field    : sphere-specific E.n sum rule (ISelfD= 2).
 1st derivatives      : Analytical E(r).r(x)/FMM algorithm (CHGder, D1EAlg=3).
                        Cavity 1st derivative terms included.
 Solvent              : Acetonitrile, Eps=  35.688000 Eps(inf)=   1.806874
 ------------------------------------------------------------------------------
 GePol: Number of generator spheres                  =      24
 GePol: Total number of spheres                      =      24
 GePol: Number of exposed spheres                    =      24 (100.00%)
 GePol: Number of points                             =    2172
 GePol: Average weight of points                     =       0.13
 GePol: Minimum weight of points                     =   0.39D-09
 GePol: Maximum weight of points                     =    0.20577
 GePol: Number of points with low weight             =     137
 GePol: Fraction of low-weight points (<1% of avg)   =       6.31%
 GePol: Cavity surface area                          =    279.772 Ang**2
 GePol: Cavity volume                                =    305.544 Ang**3
 Leave Link  301 at Wed Jan 08 20:10:15 2020, MaxMem=   134217728 cpu:         1.0
 (Enter E:\Gaussian\G09W\l302.exe)
 NPDir=0 NMtPBC=     1 NCelOv=     1 NCel=       1 NClECP=     1 NCelD=      1
         NCelK=      1 NCelE2=     1 NClLst=     1 CellRange=     0.0.
 One-electron integrals computed using PRISM.
 NBasis=   421 RedAO= T EigKep=  1.62D-06  NBF=   421
 NBsUse=   415 1.00D-06 EigRej=  6.76D-07 NBFU=   415
 Precomputing XC quadrature grid using
 IXCGrd= 4 IRadAn=           0 IRanWt=          -1 IRanGd=           0 AccXCQ= 0.00D+00.
 Generated NRdTot=       0 NPtTot=           0 NUsed=           0 NTot=          16
 NSgBfM=   431   431   431   431   431 MxSgAt=    24 MxSgA2=    24.
 Leave Link  302 at Wed Jan 08 20:10:17 2020, MaxMem=   134217728 cpu:         2.0
 (Enter E:\Gaussian\G09W\l303.exe)
 DipDrv:  MaxL=1.
 Leave Link  303 at Wed Jan 08 20:10:18 2020, MaxMem=   134217728 cpu:         0.0
 (Enter E:\Gaussian\G09W\l401.exe)
 ExpMin= 3.50D-02 ExpMax= 4.40D+05 ExpMxC= 1.51D+04 IAcc=3 IRadAn=         5 AccDes= 0.00D+00
 Harris functional with IExCor=  402 and IRadAn=       5 diagonalized for initial guess.
 HarFok:  IExCor=  402 AccDes= 0.00D+00 IRadAn=         5 IDoV= 1 UseB2=F ITyADJ=14
 ICtDFT=  3500011 ScaDFX=  1.000000  1.000000  1.000000  1.000000
 FoFCou: FMM=F IPFlag=           0 FMFlag=      100000 FMFlg1=           0
         NFxFlg=           0 DoJE=T BraDBF=F KetDBF=T FulRan=T
         wScrn=  0.000000 ICntrl=     500 IOpCl=  0 I1Cent=   200000004 NGrid=           0
         NMat0=    1 NMatS0=      1 NMatT0=    0 NMatD0=    1 NMtDS0=    0 NMtDT0=    0
 Petite list used in FoFCou.
 Harris En= -3262.61569032653    
 JPrj=0 DoOrth=F DoCkMO=F.
 Leave Link  401 at Wed Jan 08 20:11:13 2020, MaxMem=   134217728 cpu:        55.0
 (Enter E:\Gaussian\G09W\l502.exe)
 Closed shell SCF:
 Using DIIS extrapolation, IDIIS=  1040.
 Integral symmetry usage will be decided dynamically.
 IVT=      604602 IEndB=      604602 NGot=   134217728 MDV=   133823807
 LenX=   133823807 LenY=   133629766
 Requested convergence on RMS density matrix=1.00D-08 within 128 cycles.
 Requested convergence on MAX density matrix=1.00D-06.
 Requested convergence on             energy=1.00D-06.
 No special actions if energy rises.
 Fock matrices will be formed incrementally for  20 cycles.

 Cycle   1  Pass 1  IDiag  1:
 FoFJK:  IHMeth= 1 ICntrl=       0 DoSepK=F KAlg= 0 I1Cent=   0 FoldK=F
 IRaf= 830000000 NMat=   1 IRICut=       1 DoRegI=T DoRafI=F ISym2E= 0.
 FoFCou: FMM=F IPFlag=           0 FMFlag=      100000 FMFlg1=           0
         NFxFlg=           0 DoJE=F BraDBF=F KetDBF=F FulRan=T
         wScrn=  0.000000 ICntrl=       0 IOpCl=  0 I1Cent=           0 NGrid=           0
         NMat0=    1 NMatS0=      1 NMatT0=    0 NMatD0=    1 NMtDS0=    0 NMtDT0=    0
 Symmetry not used in FoFCou.
 Inv3:  Mode=1 IEnd=    14152752.
 Iteration    1 A*A^-1 deviation from unit magnitude is 3.11D-15 for   1122.
 Iteration    1 A*A^-1 deviation from orthogonality  is 2.47D-15 for   1530   1220.
 Iteration    1 A^-1*A deviation from unit magnitude is 2.55D-15 for   1842.
 Iteration    1 A^-1*A deviation from orthogonality  is 1.52D-13 for   2137   1453.
 E= -3262.19943408238    
 DIIS: error= 1.46D-01 at cycle   1 NSaved=   1.
 NSaved= 1 IEnMin= 1 EnMin= -3262.19943408238     IErMin= 1 ErrMin= 1.46D-01
 ErrMax= 1.46D-01  0.00D+00 EMaxC= 1.00D-01 BMatC= 1.59D+00 BMatP= 1.59D+00
 IDIUse=3 WtCom= 0.00D+00 WtEn= 1.00D+00
 Coeff-Com:  0.100D+01
 Coeff-En:   0.100D+01
 Coeff:      0.100D+01
 Gap=     0.174 Goal=   None    Shift=    0.000
 DSYEVD-2 returned Info=      130155 IAlg= 4 N=   415 NDim=   415 NE2=      321998 trying  DSYEV.
 GapD=    0.174 DampG=1.000 DampE=0.250 DampFc=0.2500 IDamp=-1.
 Damping current iteration by 2.50D-01
 RMSDP=1.75D-02 MaxDP=8.77D-01              OVMax= 2.77D-01

 Cycle   2  Pass 1  IDiag  1:
 RMSU=  4.22D-03    CP:  1.03D+00
 E= -3262.32277177393     Delta-E=       -0.123337691554 Rises=F Damp=T
 DIIS: error= 1.09D-01 at cycle   2 NSaved=   2.
 NSaved= 2 IEnMin= 2 EnMin= -3262.32277177393     IErMin= 2 ErrMin= 1.09D-01
 ErrMax= 1.09D-01  0.00D+00 EMaxC= 1.00D-01 BMatC= 6.56D-01 BMatP= 1.59D+00
 IDIUse=3 WtCom= 0.00D+00 WtEn= 1.00D+00
 Coeff-Com: -0.127D+01 0.227D+01
 Coeff-En:   0.000D+00 0.100D+01
 Coeff:      0.000D+00 0.100D+01
 Gap=     0.146 Goal=   None    Shift=    0.000
 RMSDP=9.08D-03 MaxDP=5.79D-01 DE=-1.23D-01 OVMax= 1.64D-01

 Cycle   3  Pass 1  IDiag  1:
 RMSU=  5.84D-03    CP:  1.01D+00  2.64D+00
 E= -3262.48842292877     Delta-E=       -0.165651154837 Rises=F Damp=F
 DIIS: error= 2.16D-02 at cycle   3 NSaved=   3.
 NSaved= 3 IEnMin= 3 EnMin= -3262.48842292877     IErMin= 3 ErrMin= 2.16D-02
 ErrMax= 2.16D-02  0.00D+00 EMaxC= 1.00D-01 BMatC= 1.13D-01 BMatP= 6.56D-01
 IDIUse=3 WtCom= 7.84D-01 WtEn= 2.16D-01
 Coeff-Com:  0.693D+00-0.753D+00 0.106D+01
 Coeff-En:   0.896D-01 0.000D+00 0.910D+00
 Coeff:      0.563D+00-0.590D+00 0.103D+01
 Gap=     0.168 Goal=   None    Shift=    0.000
 RMSDP=3.61D-03 MaxDP=2.47D-01 DE=-1.66D-01 OVMax= 6.26D-02

 Cycle   4  Pass 1  IDiag  1:
 RMSU=  2.15D-03    CP:  9.78D-01  2.07D+00  9.11D-01
 E= -3262.53033174849     Delta-E=       -0.041908819723 Rises=F Damp=F
 DIIS: error= 1.13D-02 at cycle   4 NSaved=   4.
 NSaved= 4 IEnMin= 4 EnMin= -3262.53033174849     IErMin= 4 ErrMin= 1.13D-02
 ErrMax= 1.13D-02  0.00D+00 EMaxC= 1.00D-01 BMatC= 3.07D-02 BMatP= 1.13D-01
 IDIUse=3 WtCom= 8.87D-01 WtEn= 1.13D-01
 Coeff-Com:  0.445D+00-0.562D+00 0.609D+00 0.508D+00
 Coeff-En:   0.000D+00 0.000D+00 0.204D+00 0.796D+00
 Coeff:      0.395D+00-0.498D+00 0.563D+00 0.540D+00
 Gap=     0.150 Goal=   None    Shift=    0.000
 RMSDP=1.40D-03 MaxDP=4.54D-02 DE=-4.19D-02 OVMax= 3.62D-02

 Cycle   5  Pass 1  IDiag  1:
 RMSU=  5.70D-04    CP:  9.68D-01  2.03D+00  9.80D-01  4.83D-01
 E= -3262.55214887589     Delta-E=       -0.021817127391 Rises=F Damp=F
 DIIS: error= 2.79D-03 at cycle   5 NSaved=   5.
 NSaved= 5 IEnMin= 5 EnMin= -3262.55214887589     IErMin= 5 ErrMin= 2.79D-03
 ErrMax= 2.79D-03  0.00D+00 EMaxC= 1.00D-01 BMatC= 1.75D-03 BMatP= 3.07D-02
 IDIUse=3 WtCom= 9.72D-01 WtEn= 2.79D-02
 Coeff-Com:  0.150D+00-0.190D+00 0.232D+00 0.290D+00 0.518D+00
 Coeff-En:   0.000D+00 0.000D+00 0.000D+00 0.000D+00 0.100D+01
 Coeff:      0.145D+00-0.184D+00 0.226D+00 0.281D+00 0.532D+00
 Gap=     0.147 Goal=   None    Shift=    0.000
 RMSDP=3.29D-04 MaxDP=1.83D-02 DE=-2.18D-02 OVMax= 1.14D-02

 Cycle   6  Pass 1  IDiag  1:
 RMSU=  2.08D-04    CP:  9.65D-01  2.04D+00  9.76D-01  5.49D-01  7.29D-01
 E= -3262.55351239193     Delta-E=       -0.001363516041 Rises=F Damp=F
 DIIS: error= 6.54D-04 at cycle   6 NSaved=   6.
 NSaved= 6 IEnMin= 6 EnMin= -3262.55351239193     IErMin= 6 ErrMin= 6.54D-04
 ErrMax= 6.54D-04  0.00D+00 EMaxC= 1.00D-01 BMatC= 7.25D-05 BMatP= 1.75D-03
 IDIUse=3 WtCom= 9.93D-01 WtEn= 6.54D-03
 Coeff-Com:  0.437D-01-0.554D-01 0.745D-01 0.112D+00 0.287D+00 0.538D+00
 Coeff-En:   0.000D+00 0.000D+00 0.000D+00 0.000D+00 0.000D+00 0.100D+01
 Coeff:      0.435D-01-0.550D-01 0.740D-01 0.111D+00 0.285D+00 0.541D+00
 Gap=     0.145 Goal=   None    Shift=    0.000
 RMSDP=1.56D-04 MaxDP=1.20D-02 DE=-1.36D-03 OVMax= 4.06D-03

 Cycle   7  Pass 1  IDiag  1:
 RMSU=  5.44D-05    CP:  9.67D-01  2.05D+00  9.82D-01  5.60D-01  7.46D-01
                    CP:  5.62D-01
 E= -3262.55358000700     Delta-E=       -0.000067615071 Rises=F Damp=F
 DIIS: error= 2.85D-04 at cycle   7 NSaved=   7.
 NSaved= 7 IEnMin= 7 EnMin= -3262.55358000700     IErMin= 7 ErrMin= 2.85D-04
 ErrMax= 2.85D-04  0.00D+00 EMaxC= 1.00D-01 BMatC= 1.06D-05 BMatP= 7.25D-05
 IDIUse=3 WtCom= 9.97D-01 WtEn= 2.85D-03
 Coeff-Com:  0.792D-02-0.994D-02 0.169D-01 0.313D-01 0.104D+00 0.328D+00
 Coeff-Com:  0.522D+00
 Coeff-En:   0.000D+00 0.000D+00 0.000D+00 0.000D+00 0.000D+00 0.103D+00
 Coeff-En:   0.897D+00
 Coeff:      0.789D-02-0.991D-02 0.168D-01 0.312D-01 0.104D+00 0.327D+00
 Coeff:      0.523D+00
 Gap=     0.146 Goal=   None    Shift=    0.000
 RMSDP=2.66D-05 MaxDP=1.28D-03 DE=-6.76D-05 OVMax= 1.09D-03

 Cycle   8  Pass 1  IDiag  1:
 RMSU=  1.84D-05    CP:  9.67D-01  2.05D+00  9.80D-01  5.60D-01  7.52D-01
                    CP:  6.00D-01  8.62D-01
 E= -3262.55359042797     Delta-E=       -0.000010420972 Rises=F Damp=F
 DIIS: error= 3.74D-05 at cycle   8 NSaved=   8.
 NSaved= 8 IEnMin= 8 EnMin= -3262.55359042797     IErMin= 8 ErrMin= 3.74D-05
 ErrMax= 3.74D-05  0.00D+00 EMaxC= 1.00D-01 BMatC= 6.20D-07 BMatP= 1.06D-05
 IDIUse=1 WtCom= 1.00D+00 WtEn= 0.00D+00
 Coeff-Com: -0.747D-03 0.103D-02 0.978D-03 0.426D-02 0.231D-01 0.115D+00
 Coeff-Com:  0.256D+00 0.601D+00
 Coeff:     -0.747D-03 0.103D-02 0.978D-03 0.426D-02 0.231D-01 0.115D+00
 Coeff:      0.256D+00 0.601D+00
 Gap=     0.146 Goal=   None    Shift=    0.000
 RMSDP=9.63D-06 MaxDP=6.09D-04 DE=-1.04D-05 OVMax= 2.07D-04

 Cycle   9  Pass 1  IDiag  1:
 RMSU=  5.86D-06    CP:  9.67D-01  2.05D+00  9.79D-01  5.60D-01  7.56D-01
                    CP:  5.99D-01  9.01D-01  7.79D-01
 E= -3262.55359098838     Delta-E=       -0.000000560411 Rises=F Damp=F
 DIIS: error= 1.14D-05 at cycle   9 NSaved=   9.
 NSaved= 9 IEnMin= 9 EnMin= -3262.55359098838     IErMin= 9 ErrMin= 1.14D-05
 ErrMax= 1.14D-05  0.00D+00 EMaxC= 1.00D-01 BMatC= 7.04D-08 BMatP= 6.20D-07
 IDIUse=1 WtCom= 1.00D+00 WtEn= 0.00D+00
 Coeff-Com: -0.924D-03 0.123D-02-0.370D-03 0.955D-03 0.851D-02 0.524D-01
 Coeff-Com:  0.122D+00 0.345D+00 0.471D+00
 Coeff:     -0.924D-03 0.123D-02-0.370D-03 0.955D-03 0.851D-02 0.524D-01
 Coeff:      0.122D+00 0.345D+00 0.471D+00
 Gap=     0.146 Goal=   None    Shift=    0.000
 RMSDP=1.94D-06 MaxDP=8.60D-05 DE=-5.60D-07 OVMax= 8.51D-05

 Cycle  10  Pass 1  IDiag  1:
 RMSU=  1.45D-06    CP:  9.67D-01  2.05D+00  9.79D-01  5.60D-01  7.56D-01
                    CP:  6.01D-01  8.97D-01  7.94D-01  8.99D-01
 E= -3262.55359104733     Delta-E=       -0.000000058949 Rises=F Damp=F
 DIIS: error= 3.63D-06 at cycle  10 NSaved=  10.
 NSaved=10 IEnMin=10 EnMin= -3262.55359104733     IErMin=10 ErrMin= 3.63D-06
 ErrMax= 3.63D-06  0.00D+00 EMaxC= 1.00D-01 BMatC= 3.83D-09 BMatP= 7.04D-08
 IDIUse=1 WtCom= 1.00D+00 WtEn= 0.00D+00
 Coeff-Com: -0.359D-03 0.474D-03-0.221D-03 0.190D-03 0.217D-02 0.159D-01
 Coeff-Com:  0.368D-01 0.114D+00 0.230D+00 0.601D+00
 Coeff:     -0.359D-03 0.474D-03-0.221D-03 0.190D-03 0.217D-02 0.159D-01
 Coeff:      0.368D-01 0.114D+00 0.230D+00 0.601D+00
 Gap=     0.146 Goal=   None    Shift=    0.000
 RMSDP=7.72D-07 MaxDP=3.28D-05 DE=-5.89D-08 OVMax= 2.61D-05

 Cycle  11  Pass 1  IDiag  1:
 RMSU=  5.52D-07    CP:  9.67D-01  2.05D+00  9.79D-01  5.60D-01  7.56D-01
                    CP:  6.02D-01  8.96D-01  7.89D-01  8.76D-01  8.14D-01
 E= -3262.55359105079     Delta-E=       -0.000000003465 Rises=F Damp=F
 DIIS: error= 1.61D-06 at cycle  11 NSaved=  11.
 NSaved=11 IEnMin=11 EnMin= -3262.55359105079     IErMin=11 ErrMin= 1.61D-06
 ErrMax= 1.61D-06  0.00D+00 EMaxC= 1.00D-01 BMatC= 7.35D-10 BMatP= 3.83D-09
 IDIUse=1 WtCom= 1.00D+00 WtEn= 0.00D+00
 Coeff-Com: -0.838D-04 0.109D-03-0.647D-04 0.110D-04 0.185D-03 0.268D-02
 Coeff-Com:  0.652D-02 0.246D-01 0.740D-01 0.349D+00 0.543D+00
 Coeff:     -0.838D-04 0.109D-03-0.647D-04 0.110D-04 0.185D-03 0.268D-02
 Coeff:      0.652D-02 0.246D-01 0.740D-01 0.349D+00 0.543D+00
 Gap=     0.146 Goal=   None    Shift=    0.000
 RMSDP=2.18D-07 MaxDP=7.88D-06 DE=-3.47D-09 OVMax= 7.59D-06

 Cycle  12  Pass 1  IDiag  1:
 RMSU=  1.38D-07    CP:  9.67D-01  2.05D+00  9.79D-01  5.60D-01  7.56D-01
                    CP:  6.02D-01  8.97D-01  7.92D-01  8.79D-01  8.75D-01
                    CP:  8.80D-01
 E= -3262.55359105152     Delta-E=       -0.000000000724 Rises=F Damp=F
 DIIS: error= 4.22D-07 at cycle  12 NSaved=  12.
 NSaved=12 IEnMin=12 EnMin= -3262.55359105152     IErMin=12 ErrMin= 4.22D-07
 ErrMax= 4.22D-07  0.00D+00 EMaxC= 1.00D-01 BMatC= 6.23D-11 BMatP= 7.35D-10
 IDIUse=1 WtCom= 1.00D+00 WtEn= 0.00D+00
 Coeff-Com: -0.222D-04 0.285D-04-0.230D-04-0.158D-04-0.492D-04 0.243D-03
 Coeff-Com:  0.102D-02 0.515D-02 0.251D-01 0.145D+00 0.285D+00 0.539D+00
 Coeff:     -0.222D-04 0.285D-04-0.230D-04-0.158D-04-0.492D-04 0.243D-03
 Coeff:      0.102D-02 0.515D-02 0.251D-01 0.145D+00 0.285D+00 0.539D+00
 Gap=     0.146 Goal=   None    Shift=    0.000
 RMSDP=1.02D-07 MaxDP=7.24D-06 DE=-7.24D-10 OVMax= 2.27D-06

 Cycle  13  Pass 1  IDiag  1:
 RMSU=  6.08D-08    CP:  9.67D-01  2.05D+00  9.79D-01  5.60D-01  7.56D-01
                    CP:  6.02D-01  8.97D-01  7.92D-01  8.81D-01  8.88D-01
                    CP:  8.82D-01  7.83D-01
 E= -3262.55359105157     Delta-E=       -0.000000000046 Rises=F Damp=F
 DIIS: error= 2.41D-07 at cycle  13 NSaved=  13.
 NSaved=13 IEnMin=13 EnMin= -3262.55359105157     IErMin=13 ErrMin= 2.41D-07
 ErrMax= 2.41D-07  0.00D+00 EMaxC= 1.00D-01 BMatC= 1.74D-11 BMatP= 6.23D-11
 IDIUse=1 WtCom= 1.00D+00 WtEn= 0.00D+00
 Coeff-Com:  0.240D-05-0.346D-05-0.392D-05-0.173D-04-0.757D-04-0.501D-03
 Coeff-Com: -0.774D-03-0.218D-02 0.202D-02 0.284D-01 0.810D-01 0.355D+00
 Coeff-Com:  0.537D+00
 Coeff:      0.240D-05-0.346D-05-0.392D-05-0.173D-04-0.757D-04-0.501D-03
 Coeff:     -0.774D-03-0.218D-02 0.202D-02 0.284D-01 0.810D-01 0.355D+00
 Coeff:      0.537D+00
 Gap=     0.146 Goal=   None    Shift=    0.000
 RMSDP=5.70D-08 MaxDP=3.58D-06 DE=-4.64D-11 OVMax= 9.41D-07

 Cycle  14  Pass 1  IDiag  1:
 RMSU=  2.25D-08    CP:  9.67D-01  2.05D+00  9.79D-01  5.60D-01  7.56D-01
                    CP:  6.02D-01  8.97D-01  7.92D-01  8.84D-01  8.89D-01
                    CP:  8.69D-01  8.80D-01  7.89D-01
 E= -3262.55359105154     Delta-E=        0.000000000027 Rises=F Damp=F
 DIIS: error= 4.65D-08 at cycle  14 NSaved=  14.
 NSaved=14 IEnMin=13 EnMin= -3262.55359105157     IErMin=14 ErrMin= 4.65D-08
 ErrMax= 4.65D-08  0.00D+00 EMaxC= 1.00D-01 BMatC= 1.14D-12 BMatP= 1.74D-11
 IDIUse=1 WtCom= 1.00D+00 WtEn= 0.00D+00
 Coeff-Com:  0.271D-05-0.370D-05-0.120D-05-0.907D-05-0.380D-04-0.313D-03
 Coeff-Com: -0.479D-03-0.160D-02-0.620D-03 0.608D-02 0.269D-01 0.155D+00
 Coeff-Com:  0.286D+00 0.529D+00
 Coeff:      0.271D-05-0.370D-05-0.120D-05-0.907D-05-0.380D-04-0.313D-03
 Coeff:     -0.479D-03-0.160D-02-0.620D-03 0.608D-02 0.269D-01 0.155D+00
 Coeff:      0.286D+00 0.529D+00
 Gap=     0.146 Goal=   None    Shift=    0.000
 RMSDP=1.72D-08 MaxDP=1.20D-06 DE= 2.73D-11 OVMax= 2.59D-07

 Cycle  15  Pass 1  IDiag  1:
 RMSU=  8.75D-09    CP:  9.67D-01  2.05D+00  9.79D-01  5.60D-01  7.56D-01
                    CP:  6.02D-01  8.97D-01  7.92D-01  8.84D-01  8.90D-01
                    CP:  8.72D-01  8.89D-01  8.27D-01  9.00D-01
 E= -3262.55359105144     Delta-E=        0.000000000098 Rises=F Damp=F
 DIIS: error= 1.84D-08 at cycle  15 NSaved=  15.
 NSaved=15 IEnMin=13 EnMin= -3262.55359105157     IErMin=15 ErrMin= 1.84D-08
 ErrMax= 1.84D-08  0.00D+00 EMaxC= 1.00D-01 BMatC= 1.11D-13 BMatP= 1.14D-12
 IDIUse=1 WtCom= 1.00D+00 WtEn= 0.00D+00
 Coeff-Com:  0.813D-06-0.112D-05-0.323D-06-0.235D-05-0.789D-05-0.845D-04
 Coeff-Com: -0.987D-04-0.427D-03-0.658D-03-0.188D-02 0.317D-03 0.186D-01
 Coeff-Com:  0.502D-01 0.252D+00 0.682D+00
 Coeff:      0.813D-06-0.112D-05-0.323D-06-0.235D-05-0.789D-05-0.845D-04
 Coeff:     -0.987D-04-0.427D-03-0.658D-03-0.188D-02 0.317D-03 0.186D-01
 Coeff:      0.502D-01 0.252D+00 0.682D+00
 Gap=     0.146 Goal=   None    Shift=    0.000
 RMSDP=8.20D-09 MaxDP=5.34D-07 DE= 9.82D-11 OVMax= 6.95D-08

 Error on total polarization charges =  0.01854
 SCF Done:  E(RB3LYP) =  -3262.55359105     A.U. after   15 cycles
            NFock= 15  Conv=0.82D-08     -V/T= 2.0018
 KE= 3.256635526616D+03 PE=-1.049821677522D+04 EE= 2.607744190412D+03
 Leave Link  502 at Wed Jan 08 20:40:53 2020, MaxMem=   134217728 cpu:      1780.0
 (Enter E:\Gaussian\G09W\l601.exe)
 Copying SCF densities to generalized density rwf, IOpCl= 0 IROHF=0.

 **********************************************************************

            Population analysis using the SCF density.

 **********************************************************************

 Orbital symmetries:
       Occupied  (A) (A) (A) (A) (A) (A) (A) (A) (A) (A) (A) (A)
                 (A) (A) (A) (A) (A) (A) (A) (A) (A) (A) (A) (A)
                 (A) (A) (A) (A) (A) (A) (A) (A) (A) (A) (A) (A)
                 (A) (A) (A) (A) (A) (A) (A) (A) (A) (A) (A) (A)
                 (A) (A) (A) (A) (A) (A) (A) (A) (A) (A) (A) (A)
                 (A) (A) (A) (A) (A) (A) (A) (A) (A) (A) (A)
       Virtual   (A) (A) (A) (A) (A) (A) (A) (A) (A) (A) (A) (A)
                 (A) (A) (A) (A) (A) (A) (A) (A) (A) (A) (A) (A)
                 (A) (A) (A) (A) (A) (A) (A) (A) (A) (A) (A) (A)
                 (A) (A) (A) (A) (A) (A) (A) (A) (A) (A) (A) (A)
                 (A) (A) (A) (A) (A) (A) (A) (A) (A) (A) (A) (A)
                 (A) (A) (A) (A) (A) (A) (A) (A) (A) (A) (A) (A)
                 (A) (A) (A) (A) (A) (A) (A) (A) (A) (A) (A) (A)
                 (A) (A) (A) (A) (A) (A) (A) (A) (A) (A) (A) (A)
                 (A) (A) (A) (A) (A) (A) (A) (A) (A) (A) (A) (A)
                 (A) (A) (A) (A) (A) (A) (A) (A) (A) (A) (A) (A)
                 (A) (A) (A) (A) (A) (A) (A) (A) (A) (A) (A) (A)
                 (A) (A) (A) (A) (A) (A) (A) (A) (A) (A) (A) (A)
                 (A) (A) (A) (A) (A) (A) (A) (A) (A) (A) (A) (A)
                 (A) (A) (A) (A) (A) (A) (A) (A) (A) (A) (A) (A)
                 (A) (A) (A) (A) (A) (A) (A) (A) (A) (A) (A) (A)
                 (A) (A) (A) (A) (A) (A) (A) (A) (A) (A) (A) (A)
                 (A) (A) (A) (A) (A) (A) (A) (A) (A) (A) (A) (A)
                 (A) (A) (A) (A) (A) (A) (A) (A) (A) (A) (A) (A)
                 (A) (A) (A) (A) (A) (A) (A) (A) (A) (A) (A) (A)
                 (A) (A) (A) (A) (A) (A) (A) (A) (A) (A) (A) (A)
                 (A) (A) (A) (A) (A) (A) (A) (A) (A) (A) (A) (A)
                 (A) (A) (A) (A) (A) (A) (A) (A) (A) (A) (A) (A)
                 (A) (A) (A) (A) (A) (A) (A) (A) (A) (A) (A) (A)
                 (A) (A) (A) (A) (A) (A) (A) (A) (A) (A) (A) (A)
                 (A) (A) (A) (A) (A) (A) (A) (A) (A) (A) (A) (A)
                 (A) (A) (A) (A) (A) (A) (A) (A) (A) (A) (A) (A)
                 (A) (A) (A) (A) (A) (A) (A) (A) (A) (A) (A) (A)
                 (A) (A) (A) (A) (A) (A) (A) (A) (A) (A) (A) (A)
                 (A) (A) (A) (A) (A) (A) (A) (A)
 The electronic state is 1-A.
 Alpha  occ. eigenvalues -- -482.84672 -62.49954 -56.31991 -56.31607 -56.31585
 Alpha  occ. eigenvalues --  -19.13720 -19.13549 -10.28961 -10.28803 -10.25920
 Alpha  occ. eigenvalues --  -10.21993 -10.21629 -10.21316 -10.21280 -10.21264
 Alpha  occ. eigenvalues --  -10.21214 -10.20883 -10.20205 -10.20167 -10.20121
 Alpha  occ. eigenvalues --  -10.20103  -8.70921  -6.54064  -6.52783  -6.52726
 Alpha  occ. eigenvalues --   -2.65157  -2.64797  -2.64756  -2.63737  -2.63737
 Alpha  occ. eigenvalues --   -1.07165  -1.06900  -0.90928  -0.89169  -0.84128
 Alpha  occ. eigenvalues --   -0.80555  -0.78784  -0.78272  -0.75956  -0.69600
 Alpha  occ. eigenvalues --   -0.67330  -0.64609  -0.62645  -0.59402  -0.56893
 Alpha  occ. eigenvalues --   -0.55738  -0.51401  -0.49926  -0.49529  -0.48184
 Alpha  occ. eigenvalues --   -0.46508  -0.46343  -0.46188  -0.45518  -0.45133
 Alpha  occ. eigenvalues --   -0.44524  -0.42457  -0.40882  -0.40396  -0.38747
 Alpha  occ. eigenvalues --   -0.38246  -0.38043  -0.37234  -0.33439  -0.30940
 Alpha  occ. eigenvalues --   -0.29383  -0.29349  -0.28627  -0.28178  -0.28125
 Alpha  occ. eigenvalues --   -0.27013
 Alpha virt. eigenvalues --   -0.12445  -0.08106  -0.04414  -0.03344  -0.02729
 Alpha virt. eigenvalues --   -0.00172   0.00892   0.01894   0.02320   0.02501
 Alpha virt. eigenvalues --    0.02983   0.03096   0.04030   0.04403   0.04978
 Alpha virt. eigenvalues --    0.05226   0.05332   0.05686   0.06269   0.07442
 Alpha virt. eigenvalues --    0.07485   0.07951   0.08763   0.09050   0.09295
 Alpha virt. eigenvalues --    0.10316   0.10780   0.11471   0.11707   0.12275
 Alpha virt. eigenvalues --    0.12675   0.12939   0.13548   0.14168   0.14381
 Alpha virt. eigenvalues --    0.14761   0.15689   0.16325   0.16631   0.16768
 Alpha virt. eigenvalues --    0.17341   0.17468   0.17848   0.17977   0.18342
 Alpha virt. eigenvalues --    0.19025   0.19118   0.19303   0.19570   0.19850
 Alpha virt. eigenvalues --    0.19857   0.20240   0.21248   0.21441   0.22238
 Alpha virt. eigenvalues --    0.22547   0.23091   0.23615   0.23862   0.24046
 Alpha virt. eigenvalues --    0.24653   0.25276   0.25361   0.25611   0.26080
 Alpha virt. eigenvalues --    0.26731   0.27331   0.27500   0.28524   0.29078
 Alpha virt. eigenvalues --    0.29409   0.29871   0.30002   0.30327   0.30693
 Alpha virt. eigenvalues --    0.31197   0.32131   0.32659   0.33009   0.33502
 Alpha virt. eigenvalues --    0.34249   0.34862   0.35526   0.36146   0.36574
 Alpha virt. eigenvalues --    0.37822   0.39188   0.40211   0.41085   0.42891
 Alpha virt. eigenvalues --    0.44251   0.44760   0.46155   0.46713   0.48755
 Alpha virt. eigenvalues --    0.49653   0.50825   0.51726   0.51901   0.52546
 Alpha virt. eigenvalues --    0.52902   0.53382   0.53511   0.54541   0.55304
 Alpha virt. eigenvalues --    0.55365   0.57912   0.58629   0.58836   0.58872
 Alpha virt. eigenvalues --    0.59615   0.61059   0.61206   0.62004   0.62352
 Alpha virt. eigenvalues --    0.63055   0.63219   0.63568   0.63625   0.65204
 Alpha virt. eigenvalues --    0.65479   0.66301   0.66544   0.67643   0.68685
 Alpha virt. eigenvalues --    0.69610   0.70341   0.70394   0.71489   0.72085
 Alpha virt. eigenvalues --    0.72431   0.74399   0.74841   0.75454   0.76785
 Alpha virt. eigenvalues --    0.77209   0.78413   0.79692   0.82342   0.83521
 Alpha virt. eigenvalues --    0.84274   0.84895   0.85916   0.87059   0.88214
 Alpha virt. eigenvalues --    0.89603   0.90652   0.91375   0.91852   0.91936
 Alpha virt. eigenvalues --    0.93046   0.93289   0.94766   0.95386   0.96612
 Alpha virt. eigenvalues --    0.96671   0.98576   0.99127   0.99286   1.01748
 Alpha virt. eigenvalues --    1.03172   1.05787   1.06200   1.08574   1.09194
 Alpha virt. eigenvalues --    1.10080   1.10379   1.12875   1.13914   1.14498
 Alpha virt. eigenvalues --    1.16893   1.17644   1.18551   1.18868   1.18888
 Alpha virt. eigenvalues --    1.19239   1.21304   1.21777   1.23171   1.25100
 Alpha virt. eigenvalues --    1.26488   1.30646   1.31869   1.33481   1.34110
 Alpha virt. eigenvalues --    1.34489   1.40050   1.44330   1.47453   1.48034
 Alpha virt. eigenvalues --    1.48759   1.50193   1.51275   1.51288   1.53372
 Alpha virt. eigenvalues --    1.55015   1.55652   1.58726   1.62305   1.65999
 Alpha virt. eigenvalues --    1.69159   1.69808   1.73277   1.74139   1.76736
 Alpha virt. eigenvalues --    1.78138   1.79601   1.81545   1.82057   1.83681
 Alpha virt. eigenvalues --    1.83869   1.85383   1.87658   1.89558   1.89700
 Alpha virt. eigenvalues --    1.89967   1.90444   1.90854   1.91283   1.92337
 Alpha virt. eigenvalues --    1.93129   1.96259   1.97518   1.99734   2.01753
 Alpha virt. eigenvalues --    2.02685   2.02994   2.07314   2.08481   2.14768
 Alpha virt. eigenvalues --    2.15307   2.22526   2.23552   2.25522   2.27197
 Alpha virt. eigenvalues --    2.29877   2.31647   2.32144   2.32997   2.34725
 Alpha virt. eigenvalues --    2.35129   2.37340   2.39353   2.42029   2.42192
 Alpha virt. eigenvalues --    2.49120   2.54309   2.56522   2.58403   2.58810
 Alpha virt. eigenvalues --    2.61838   2.65239   2.68469   2.71128   2.74103
 Alpha virt. eigenvalues --    2.74304   2.75154   2.79389   2.80740   2.82534
 Alpha virt. eigenvalues --    2.83894   2.83928   2.84592   2.85560   2.89211
 Alpha virt. eigenvalues --    2.90969   2.92591   2.95137   2.99131   2.99440
 Alpha virt. eigenvalues --    3.05153   3.05762   3.06443   3.14200   3.15742
 Alpha virt. eigenvalues --    3.17734   3.19510   3.21249   3.24380   3.27366
 Alpha virt. eigenvalues --    3.29276   3.31531   3.31652   3.32108   3.32802
 Alpha virt. eigenvalues --    3.34574   3.36900   3.39603   3.45011   3.48846
 Alpha virt. eigenvalues --    3.49602   3.51487   3.57013   3.60328   3.61316
 Alpha virt. eigenvalues --    3.65678   3.70222   3.80053   3.84492   3.92914
 Alpha virt. eigenvalues --    3.98157   4.02066   4.12691   4.17293   4.18010
 Alpha virt. eigenvalues --    4.20188   4.21665   4.37322   4.37366   4.55232
 Alpha virt. eigenvalues --    4.72484   4.77455   4.78324   5.03332   5.04668
 Alpha virt. eigenvalues --    5.21953   5.24561   5.69702   5.77802   6.74035
 Alpha virt. eigenvalues --    7.54359   7.67082   7.73616  23.29018  23.42662
 Alpha virt. eigenvalues --   23.83591  23.84864  23.85456  23.85831  23.88692
 Alpha virt. eigenvalues --   23.91427  23.99885  24.02414  24.02897  24.03805
 Alpha virt. eigenvalues --   24.10826  24.12095  47.99643  50.01831  50.06790
 Alpha virt. eigenvalues --  289.74117 289.86879 289.959011020.80526
          Condensed to atoms (all electrons):
               1          2          3          4          5          6
     1  C    6.453653   0.157296  -0.655568   0.096013  -0.360689   0.683738
     2  C    0.157296   8.986283  -1.153714  -0.135367   1.044933  -0.482069
     3  C   -0.655568  -1.153714  14.296912  -3.248337   0.081001   0.141745
     4  C    0.096013  -0.135367  -3.248337  14.978687  -0.549634  -0.604651
     5  C   -0.360689   1.044933   0.081001  -0.549634   8.319432   0.257716
     6  C    0.683738  -0.482069   0.141745  -0.604651   0.257716   6.464915
     7  H    0.347922  -0.062395   0.028115   0.013231  -0.014257   0.020211
     8  H   -0.005009   0.301672  -0.074281   0.030624  -0.017323  -0.017370
     9  H   -0.015874  -0.011415   0.011131  -0.084335   0.291787  -0.001242
    10  H    0.020910  -0.012085   0.025532   0.011654  -0.063201   0.352809
    11  C   -0.128986  -0.373590  -0.097851   0.172074  -1.689500   0.034563
    12  O   -0.002093  -0.002967  -0.301136  -0.085184   0.093042   0.049035
    13  C    0.182254  -1.917617   0.741228   0.483862  -0.737671  -0.001837
    14  C   -0.143912  -0.738227  -3.864142   0.991360   0.019185   0.015918
    15  C   -0.025824   0.301442   1.099514  -5.074982  -0.599806  -0.219878
    16  C   -0.051491   0.029668  -0.815351  -0.302089  -0.142840  -0.056501
    17  C   -0.067531  -0.080388  -0.292916  -0.915483   0.063184  -0.062804
    18  C   -0.005149  -0.036145  -0.131975   0.205738  -0.079650   0.001839
    19  H    0.000225  -0.000314   0.007064   0.031933   0.007590   0.000639
    20  C    0.000892  -0.077019   0.117313   0.064473  -0.069887  -0.001676
    21  H    0.000815   0.005211   0.016325   0.007053  -0.000454   0.000127
    22  H   -0.000016  -0.000151   0.000704   0.001495   0.000213   0.000009
    23  Br  -0.000164   0.000754  -0.003265  -0.019774  -0.003296  -0.000496
    24  O    0.049635   0.112660  -0.156876  -0.288496  -0.001559  -0.006160
               7          8          9         10         11         12
     1  C    0.347922  -0.005009  -0.015874   0.020910  -0.128986  -0.002093
     2  C   -0.062395   0.301672  -0.011415  -0.012085  -0.373590  -0.002967
     3  C    0.028115  -0.074281   0.011131   0.025532  -0.097851  -0.301136
     4  C    0.013231   0.030624  -0.084335   0.011654   0.172074  -0.085184
     5  C   -0.014257  -0.017323   0.291787  -0.063201  -1.689500   0.093042
     6  C    0.020211  -0.017370  -0.001242   0.352809   0.034563   0.049035
     7  H    0.424134  -0.004655  -0.000227  -0.005181   0.001672   0.000006
     8  H   -0.004655   0.415536   0.000072  -0.000219   0.007116   0.000005
     9  H   -0.000227   0.000072   0.415875  -0.004694   0.080440   0.008574
    10  H   -0.005181  -0.000219  -0.004694   0.424003  -0.012361   0.000031
    11  C    0.001672   0.007116   0.080440  -0.012361   9.256656   0.619075
    12  O    0.000006   0.000005   0.008574   0.000031   0.619075   8.222689
    13  C   -0.007445   0.061018   0.005468   0.003612   1.005618  -0.018933
    14  C    0.000979   0.005089   0.024092  -0.000295   0.028805  -0.169815
    15  C   -0.000586   0.016592   0.009347   0.000854  -0.120608  -0.312724
    16  C    0.000195  -0.000086   0.004766  -0.000414  -2.219689   0.061327
    17  C   -0.000458   0.006332   0.000120   0.000137  -0.595311  -0.009649
    18  C    0.000017   0.000039  -0.000053  -0.000008   0.230281   0.093057
    19  H    0.000000   0.000000  -0.000015   0.000000   0.117265   0.011426
    20  C   -0.000018   0.000308  -0.000168   0.000007   0.289181   0.009437
    21  H    0.000000  -0.000013   0.000000   0.000000   0.011132   0.000007
    22  H    0.000000   0.000000   0.000000   0.000000   0.002912   0.000007
    23  Br   0.000000   0.000001   0.000005   0.000000  -0.069535   0.001078
    24  O    0.000028   0.008383   0.000011   0.000005  -0.015952  -0.000076
              13         14         15         16         17         18
     1  C    0.182254  -0.143912  -0.025824  -0.051491  -0.067531  -0.005149
     2  C   -1.917617  -0.738227   0.301442   0.029668  -0.080388  -0.036145
     3  C    0.741228  -3.864142   1.099514  -0.815351  -0.292916  -0.131975
     4  C    0.483862   0.991360  -5.074982  -0.302089  -0.915483   0.205738
     5  C   -0.737671   0.019185  -0.599806  -0.142840   0.063184  -0.079650
     6  C   -0.001837   0.015918  -0.219878  -0.056501  -0.062804   0.001839
     7  H   -0.007445   0.000979  -0.000586   0.000195  -0.000458   0.000017
     8  H    0.061018   0.005089   0.016592  -0.000086   0.006332   0.000039
     9  H    0.005468   0.024092   0.009347   0.004766   0.000120  -0.000053
    10  H    0.003612  -0.000295   0.000854  -0.000414   0.000137  -0.000008
    11  C    1.005618   0.028805  -0.120608  -2.219689  -0.595311   0.230281
    12  O   -0.018933  -0.169815  -0.312724   0.061327  -0.009649   0.093057
    13  C    8.599152   0.348141  -0.210141  -0.887467  -2.046333  -0.119784
    14  C    0.348141  14.672761  -3.878297   0.186990   0.509972  -1.976964
    15  C   -0.210141  -3.878297  15.626550   0.920672  -0.101924  -0.069537
    16  C   -0.887467   0.186990   0.920672   9.581789   0.682741   0.342388
    17  C   -2.046333   0.509972  -0.101924   0.682741   8.671672  -0.347294
    18  C   -0.119784  -1.976964  -0.069537   0.342388  -0.347294   7.466908
    19  H    0.012102  -0.032235  -0.014073   0.248799  -0.017856  -0.046032
    20  C    0.358689  -0.032405  -1.722595  -1.662404   0.175412   0.616831
    21  H    0.091062   0.048290  -0.095296  -0.030012   0.280536  -0.037028
    22  H   -0.004497   0.021398   0.025199   0.007995  -0.002561  -0.029932
    23  Br  -0.007152  -0.016475   0.072739   0.111129   0.059223  -0.014429
    24  O    0.553168  -0.274725  -0.090561  -0.009663   0.088844  -0.003936
              19         20         21         22         23         24
     1  C    0.000225   0.000892   0.000815  -0.000016  -0.000164   0.049635
     2  C   -0.000314  -0.077019   0.005211  -0.000151   0.000754   0.112660
     3  C    0.007064   0.117313   0.016325   0.000704  -0.003265  -0.156876
     4  C    0.031933   0.064473   0.007053   0.001495  -0.019774  -0.288496
     5  C    0.007590  -0.069887  -0.000454   0.000213  -0.003296  -0.001559
     6  C    0.000639  -0.001676   0.000127   0.000009  -0.000496  -0.006160
     7  H    0.000000  -0.000018   0.000000   0.000000   0.000000   0.000028
     8  H    0.000000   0.000308  -0.000013   0.000000   0.000001   0.008383
     9  H   -0.000015  -0.000168   0.000000   0.000000   0.000005   0.000011
    10  H    0.000000   0.000007   0.000000   0.000000   0.000000   0.000005
    11  C    0.117265   0.289181   0.011132   0.002912  -0.069535  -0.015952
    12  O    0.011426   0.009437   0.000007   0.000007   0.001078  -0.000076
    13  C    0.012102   0.358689   0.091062  -0.004497  -0.007152   0.553168
    14  C   -0.032235  -0.032405   0.048290   0.021398  -0.016475  -0.274725
    15  C   -0.014073  -1.722595  -0.095296   0.025199   0.072739  -0.090561
    16  C    0.248799  -1.662404  -0.030012   0.007995   0.111129  -0.009663
    17  C   -0.017856   0.175412   0.280536  -0.002561   0.059223   0.088844
    18  C   -0.046032   0.616831  -0.037028  -0.029932  -0.014429  -0.003936
    19  H    0.399895   0.000374   0.000063  -0.000137  -0.012069  -0.000001
    20  C    0.000374   7.981493   0.017081   0.307658   0.053368   0.067047
    21  H    0.000063   0.017081   0.407933  -0.004534   0.000199   0.008326
    22  H   -0.000137   0.307658  -0.004534   0.406515  -0.010074   0.000052
    23  Br  -0.012069   0.053368   0.000199  -0.010074  34.997882  -0.000023
    24  O   -0.000001   0.067047   0.008326   0.000052  -0.000023   8.232823
 Mulliken charges:
               1
     1  C   -0.531047
     2  C    0.143546
     3  C    0.228825
     4  C    0.220136
     5  C    0.151685
     6  C   -0.568581
     7  H    0.258713
     8  H    0.266168
     9  H    0.266332
    10  H    0.258905
    11  C   -0.533408
    12  O   -0.266217
    13  C   -0.486496
    14  C    0.254512
    15  C    0.463923
    16  C   -0.000452
    17  C    0.002333
    18  C   -0.059181
    19  H    0.285357
    20  C   -0.493392
    21  H    0.273178
    22  H    0.277744
    23  Br  -0.139628
    24  O   -0.272955
 Sum of Mulliken charges =   0.00000
 Mulliken charges with hydrogens summed into heavy atoms:
               1
     1  C   -0.272334
     2  C    0.409714
     3  C    0.228825
     4  C    0.220136
     5  C    0.418017
     6  C   -0.309677
    11  C   -0.533408
    12  O   -0.266217
    13  C   -0.486496
    14  C    0.254512
    15  C    0.463923
    16  C    0.284905
    17  C    0.275511
    18  C   -0.059181
    20  C   -0.215648
    23  Br  -0.139628
    24  O   -0.272955
 Electronic spatial extent (au):  <R**2>=           6235.9550
 Charge=              0.0000 electrons
 Dipole moment (field-independent basis, Debye):
    X=             -2.2692    Y=              0.4986    Z=              0.0001  Tot=              2.3233
 Quadrupole moment (field-independent basis, Debye-Ang):
   XX=            -85.5039   YY=           -118.7599   ZZ=           -112.1692
   XY=             10.5578   XZ=             -0.0009   YZ=              0.0093
 Traceless Quadrupole moment (field-independent basis, Debye-Ang):
   XX=             19.9738   YY=            -13.2822   ZZ=             -6.6916
   XY=             10.5578   XZ=             -0.0009   YZ=              0.0093
 Octapole moment (field-independent basis, Debye-Ang**2):
  XXX=            -17.2479  YYY=            -14.9784  ZZZ=             -0.0025  XYY=             64.3805
  XXY=            -24.7823  XXZ=              0.0015  XZZ=             49.9546  YZZ=             -4.3626
  YYZ=              0.0014  XYZ=             -0.0121
 Hexadecapole moment (field-independent basis, Debye-Ang**3):
 XXXX=          -5065.5268 YYYY=          -1478.1852 ZZZZ=           -127.0658 XXXY=             29.1275
 XXXZ=             -0.0070 YYYX=             55.5824 YYYZ=              0.0591 ZZZX=             -0.0115
 ZZZY=             -0.0088 XXYY=          -1146.4959 XXZZ=          -1098.2395 YYZZ=           -254.9836
 XXYZ=              0.0387 YYXZ=             -0.0069 ZZXY=            -28.9052
 N-N= 1.371283467141D+03 E-N=-1.049821677727D+04  KE= 3.256635526616D+03
 No NMR shielding tensors so no spin-rotation constants.
 Leave Link  601 at Wed Jan 08 20:40:54 2020, MaxMem=   134217728 cpu:         1.0
 (Enter E:\Gaussian\G09W\l701.exe)
 Compute integral first derivatives.
 ... and contract with generalized density number  0.
 R6Disp: Adding Grimme-D3(BJ) dispersion energy 1st derivatives to the gradient.
 D1PCM: PCM CHGder 1st derivatives, ID1Alg=3 FixD1E=F DoIter=F DoCFld=F I1PDM=0.
 GePol: Maximum number of non-zero 1st derivatives   =     349
 Leave Link  701 at Wed Jan 08 20:41:25 2020, MaxMem=   134217728 cpu:        31.0
 (Enter E:\Gaussian\G09W\l702.exe)
 L702 exits ... SP integral derivatives will be done elsewhere.
 Leave Link  702 at Wed Jan 08 20:41:25 2020, MaxMem=   134217728 cpu:         0.0
 (Enter E:\Gaussian\G09W\l703.exe)
 Compute integral first derivatives, UseDBF=F ICtDFT=           0.
 Integral derivatives from FoFJK, PRISM(SPDF).
 Calling FoFJK, ICntrl=      2127 FMM=F ISym2X=0 I1Cent= 0 IOpClX= 0 NMat=1 NMatS=1 NMatT=0.
 FoFJK:  IHMeth= 1 ICntrl=    2127 DoSepK=F KAlg= 0 I1Cent=   0 FoldK=F
 IRaf=         0 NMat=   1 IRICut=       1 DoRegI=T DoRafI=F ISym2E= 0.
 FoFCou: FMM=F IPFlag=           0 FMFlag=      100000 FMFlg1=         800
         NFxFlg=           0 DoJE=F BraDBF=F KetDBF=F FulRan=T
         wScrn=  0.000000 ICntrl=    2127 IOpCl=  0 I1Cent=           0 NGrid=           0
         NMat0=    1 NMatS0=      1 NMatT0=    0 NMatD0=    1 NMtDS0=    0 NMtDT0=    0
 Symmetry not used in FoFCou.
 Leave Link  703 at Wed Jan 08 20:49:33 2020, MaxMem=   134217728 cpu:       488.0
 (Enter E:\Gaussian\G09W\l716.exe)
 Dipole        =-8.92759477D-01 1.96183328D-01 4.33033261D-05
 ***** Axes restored to original set *****
 -------------------------------------------------------------------
 Center     Atomic                   Forces (Hartrees/Bohr)
 Number     Number              X              Y              Z
 -------------------------------------------------------------------
      1        6          -0.000066185    0.000086569   -0.000001740
      2        6           0.000606727    0.000128431    0.000003595
      3        6           0.000677795    0.000472602    0.000029729
      4        6           0.000831177   -0.000161299   -0.000026032
      5        6           0.000623276    0.000111278   -0.000003741
      6        6          -0.000013105   -0.000121815    0.000001587
      7        1           0.000198165   -0.000115248   -0.000000477
      8        1          -0.000207434   -0.000326395    0.000001261
      9        1          -0.000296495    0.000203278   -0.000001223
     10        1           0.000151353    0.000156183    0.000000524
     11        6          -0.000661377    0.003096535    0.000113398
     12        8           0.000315487   -0.001588657   -0.000043365
     13        6           0.000818912   -0.003245944   -0.000125405
     14        6          -0.000507096   -0.000524464   -0.000026346
     15        6          -0.000994456    0.000212596    0.000030651
     16        6          -0.000473045   -0.000245723   -0.000003553
     17        6          -0.000384791   -0.000179856    0.000003308
     18        6           0.000195644   -0.000093357    0.000001042
     19        1           0.000293088    0.000286842   -0.000001043
     20        6           0.000096927    0.000151201   -0.000001141
     21        1           0.000304137   -0.000196161    0.000000952
     22        1          -0.000052286   -0.000181074   -0.000000384
     23       35          -0.001048582    0.000371414    0.000000462
     24        8          -0.000407836    0.001703065    0.000047939
 -------------------------------------------------------------------
 Cartesian Forces:  Max     0.003245944 RMS     0.000679377
 Leave Link  716 at Wed Jan 08 20:49:34 2020, MaxMem=   134217728 cpu:         0.0
 (Enter E:\Gaussian\G09W\l103.exe)

 GradGradGradGradGradGradGradGradGradGradGradGradGradGradGradGradGradGrad
 Berny optimization.
 FormGI is forming the generalized inverse of G from B-inverse, IUseBI=4.
 Internal  Forces:  Max     0.001750413 RMS     0.000384915
 Search for a local minimum.
 Step number   1 out of a maximum of  142
 All quantities printed in internal units (Hartrees-Bohrs-Radians)
 RMS Force = .38491D-03 SwitMx=.10000D-02 MixMth= 2
 Mixed Optimization -- En-DIIS/RFO-DIIS
 Second derivative matrix not updated -- first step.
 ITU=  0
     Eigenvalues ---    0.00885   0.00893   0.00902   0.01437   0.01537
     Eigenvalues ---    0.01669   0.01728   0.01803   0.01852   0.02148
     Eigenvalues ---    0.02148   0.02161   0.02165   0.02169   0.02171
     Eigenvalues ---    0.02177   0.02186   0.02191   0.02193   0.02199
     Eigenvalues ---    0.02216   0.16000   0.16000   0.16000   0.16000
     Eigenvalues ---    0.16000   0.16000   0.16000   0.17560   0.22000
     Eigenvalues ---    0.22440   0.22587   0.23522   0.24495   0.24622
     Eigenvalues ---    0.25000   0.25000   0.25000   0.25000   0.25000
     Eigenvalues ---    0.25000   0.31974   0.32565   0.33315   0.33555
     Eigenvalues ---    0.35475   0.35479   0.35611   0.35612   0.35627
     Eigenvalues ---    0.35665   0.35748   0.39104   0.41464   0.42267
     Eigenvalues ---    0.42484   0.44806   0.45323   0.46044   0.46182
     Eigenvalues ---    0.46701   0.46962   0.47038   0.47401   0.94375
     Eigenvalues ---    0.94730
 RFO step:  Lambda=-5.24460352D-05 EMin= 8.85063369D-03
 Linear search not attempted -- first point.
 Iteration  1 RMS(Cart)=  0.00218688 RMS(Int)=  0.00000110
 Iteration  2 RMS(Cart)=  0.00000117 RMS(Int)=  0.00000038
 Iteration  3 RMS(Cart)=  0.00000000 RMS(Int)=  0.00000038
 ITry= 1 IFail=0 DXMaxC= 1.30D-02 DCOld= 1.00D+10 DXMaxT= 3.00D-01 DXLimC= 3.00D+00 Rises=F
 Variable       Old X    -DE/DX   Delta X   Delta X   Delta X     New X
                                 (Linear)    (Quad)   (Total)
    R1        2.62773  -0.00021   0.00000  -0.00042  -0.00042   2.62731
    R2        2.64014  -0.00022   0.00000  -0.00045  -0.00045   2.63970
    R3        2.04910  -0.00022   0.00000  -0.00062  -0.00062   2.04848
    R4        2.64091  -0.00046   0.00000  -0.00101  -0.00101   2.63990
    R5        2.04694  -0.00027   0.00000  -0.00077  -0.00077   2.04618
    R6        2.66092  -0.00052   0.00000  -0.00124  -0.00124   2.65968
    R7        2.81480  -0.00147   0.00000  -0.00440  -0.00440   2.81040
    R8        2.64140  -0.00048   0.00000  -0.00105  -0.00105   2.64035
    R9        2.81242  -0.00152   0.00000  -0.00453  -0.00453   2.80790
   R10        2.62738  -0.00022   0.00000  -0.00044  -0.00044   2.62694
   R11        2.04693  -0.00027   0.00000  -0.00076  -0.00076   2.04617
   R12        2.04904  -0.00022   0.00000  -0.00062  -0.00062   2.04841
   R13        2.30827   0.00162   0.00000   0.00171   0.00171   2.30997
   R14        2.82273  -0.00147   0.00000  -0.00443  -0.00443   2.81830
   R15        2.81555  -0.00157   0.00000  -0.00467  -0.00467   2.81088
   R16        2.30979   0.00175   0.00000   0.00185   0.00185   2.31165
   R17        2.65520  -0.00038   0.00000  -0.00083  -0.00083   2.65437
   R18        2.63921  -0.00060   0.00000  -0.00131  -0.00131   2.63790
   R19        2.64090  -0.00033   0.00000  -0.00070  -0.00070   2.64020
   R20        2.62243  -0.00044   0.00000  -0.00093  -0.00093   2.62150
   R21        2.04478  -0.00022   0.00000  -0.00061  -0.00061   2.04416
   R22        2.62463  -0.00041   0.00000  -0.00084  -0.00084   2.62378
   R23        2.04669  -0.00026   0.00000  -0.00074  -0.00074   2.04595
   R24        2.63780  -0.00045   0.00000  -0.00096  -0.00096   2.63684
   R25        3.61788  -0.00111   0.00000  -0.00631  -0.00631   3.61157
   R26        2.04609  -0.00016   0.00000  -0.00046  -0.00046   2.04563
    A1        2.09564  -0.00003   0.00000  -0.00003  -0.00003   2.09562
    A2        2.09223   0.00005   0.00000   0.00023   0.00023   2.09247
    A3        2.09531  -0.00002   0.00000  -0.00020  -0.00020   2.09510
    A4        2.09987  -0.00005   0.00000  -0.00023  -0.00023   2.09964
    A5        2.11087  -0.00024   0.00000  -0.00154  -0.00154   2.10933
    A6        2.07245   0.00029   0.00000   0.00177   0.00177   2.07422
    A7        2.08759   0.00007   0.00000   0.00022   0.00022   2.08781
    A8        2.07849  -0.00007   0.00000  -0.00018  -0.00018   2.07831
    A9        2.11711  -0.00001   0.00000  -0.00004  -0.00004   2.11707
   A10        2.08836   0.00010   0.00000   0.00032   0.00032   2.08867
   A11        2.11681  -0.00001   0.00000  -0.00003  -0.00003   2.11678
   A12        2.07801  -0.00009   0.00000  -0.00028  -0.00028   2.07773
   A13        2.09959  -0.00005   0.00000  -0.00025  -0.00025   2.09935
   A14        2.07312   0.00028   0.00000   0.00173   0.00173   2.07485
   A15        2.11047  -0.00023   0.00000  -0.00149  -0.00149   2.10899
   A16        2.09532  -0.00003   0.00000  -0.00004  -0.00004   2.09529
   A17        2.09540  -0.00001   0.00000  -0.00017  -0.00017   2.09523
   A18        2.09246   0.00005   0.00000   0.00020   0.00020   2.09267
   A19        2.12276  -0.00005   0.00000  -0.00020  -0.00021   2.12256
   A20        2.04839   0.00003   0.00000   0.00010   0.00010   2.04849
   A21        2.11204   0.00003   0.00000   0.00011   0.00011   2.11214
   A22        2.05014   0.00005   0.00000   0.00018   0.00018   2.05032
   A23        2.11983  -0.00008   0.00000  -0.00031  -0.00031   2.11952
   A24        2.11321   0.00003   0.00000   0.00013   0.00013   2.11334
   A25        2.11741  -0.00002   0.00000  -0.00006  -0.00006   2.11735
   A26        2.06934  -0.00004   0.00000  -0.00018  -0.00018   2.06916
   A27        2.09644   0.00006   0.00000   0.00024   0.00024   2.09668
   A28        2.11651  -0.00004   0.00000  -0.00015  -0.00015   2.11636
   A29        2.08187  -0.00006   0.00000  -0.00030  -0.00030   2.08157
   A30        2.08481   0.00010   0.00000   0.00045   0.00045   2.08526
   A31        2.08154  -0.00025   0.00000  -0.00114  -0.00114   2.08040
   A32        2.07871   0.00047   0.00000   0.00271   0.00271   2.08141
   A33        2.12294  -0.00022   0.00000  -0.00157  -0.00157   2.12137
   A34        2.10733  -0.00008   0.00000  -0.00028  -0.00028   2.10705
   A35        2.07653   0.00031   0.00000   0.00182   0.00182   2.07835
   A36        2.09933  -0.00023   0.00000  -0.00154  -0.00154   2.09779
   A37        2.11935   0.00038   0.00000   0.00157   0.00157   2.12092
   A38        2.08232  -0.00017   0.00000  -0.00072  -0.00072   2.08160
   A39        2.08151  -0.00021   0.00000  -0.00085  -0.00085   2.08066
   A40        2.07691  -0.00020   0.00000  -0.00084  -0.00084   2.07607
   A41        2.10155   0.00022   0.00000   0.00115   0.00115   2.10270
   A42        2.10473  -0.00001   0.00000  -0.00031  -0.00031   2.10442
    D1        0.00000   0.00000   0.00000   0.00001   0.00001   0.00001
    D2       -3.14158   0.00000   0.00000  -0.00015  -0.00015   3.14146
    D3        3.14159   0.00000   0.00000   0.00008   0.00008  -3.14152
    D4        0.00001   0.00000   0.00000  -0.00008  -0.00008  -0.00007
    D5       -0.00001   0.00000   0.00000   0.00008   0.00008   0.00008
    D6       -3.14159   0.00000   0.00000   0.00001   0.00001  -3.14158
    D7        3.14159   0.00000   0.00000   0.00001   0.00001  -3.14158
    D8        0.00001   0.00000   0.00000  -0.00006  -0.00006  -0.00005
    D9        0.00001   0.00000   0.00000  -0.00019  -0.00019  -0.00017
   D10       -3.14154  -0.00001   0.00000  -0.00048  -0.00048   3.14116
   D11        3.14159   0.00000   0.00000  -0.00003  -0.00003   3.14156
   D12        0.00004   0.00000   0.00000  -0.00033  -0.00033  -0.00029
   D13       -0.00002   0.00001   0.00000   0.00028   0.00028   0.00026
   D14        3.14154   0.00001   0.00000   0.00057   0.00057  -3.14108
   D15        3.14153   0.00001   0.00000   0.00058   0.00058  -3.14107
   D16       -0.00010   0.00001   0.00000   0.00087   0.00087   0.00078
   D17       -3.14151  -0.00001   0.00000  -0.00065  -0.00065   3.14102
   D18       -0.00088   0.00003   0.00000   0.00282   0.00282   0.00194
   D19        0.00012  -0.00001   0.00000  -0.00095  -0.00095  -0.00084
   D20        3.14075   0.00002   0.00000   0.00252   0.00252  -3.13992
   D21        0.00001   0.00000   0.00000  -0.00019  -0.00019  -0.00018
   D22        3.14159   0.00000   0.00000  -0.00003  -0.00003   3.14156
   D23       -3.14154  -0.00001   0.00000  -0.00048  -0.00048   3.14117
   D24        0.00003   0.00000   0.00000  -0.00032  -0.00032  -0.00028
   D25        3.14080   0.00002   0.00000   0.00231   0.00231  -3.14008
   D26        0.00007  -0.00001   0.00000  -0.00072  -0.00072  -0.00066
   D27       -0.00083   0.00002   0.00000   0.00260   0.00260   0.00177
   D28       -3.14156  -0.00001   0.00000  -0.00043  -0.00043   3.14119
   D29        0.00000   0.00000   0.00000   0.00001   0.00001   0.00001
   D30        3.14159   0.00000   0.00000   0.00008   0.00008  -3.14152
   D31       -3.14158   0.00000   0.00000  -0.00015  -0.00015   3.14146
   D32        0.00001   0.00000   0.00000  -0.00008  -0.00008  -0.00007
   D33       -0.00007   0.00001   0.00000   0.00072   0.00072   0.00065
   D34        3.14156   0.00001   0.00000   0.00041   0.00041  -3.14121
   D35       -3.14081  -0.00002   0.00000  -0.00229  -0.00229   3.14009
   D36        0.00083  -0.00002   0.00000  -0.00260  -0.00260  -0.00177
   D37       -0.00012   0.00001   0.00000   0.00095   0.00095   0.00083
   D38        3.14151   0.00001   0.00000   0.00065   0.00065  -3.14102
   D39       -3.14075  -0.00002   0.00000  -0.00251  -0.00251   3.13992
   D40        0.00088  -0.00003   0.00000  -0.00281  -0.00281  -0.00193
   D41        0.00010  -0.00001   0.00000  -0.00086  -0.00086  -0.00076
   D42       -3.14154  -0.00001   0.00000  -0.00056  -0.00056   3.14109
   D43       -3.14154  -0.00001   0.00000  -0.00055  -0.00055   3.14110
   D44        0.00002  -0.00001   0.00000  -0.00025  -0.00025  -0.00024
   D45        3.14154   0.00001   0.00000   0.00047   0.00047  -3.14117
   D46       -0.00004   0.00000   0.00000   0.00032   0.00032   0.00028
   D47       -0.00001   0.00000   0.00000   0.00017   0.00017   0.00016
   D48       -3.14159   0.00000   0.00000   0.00002   0.00002  -3.14157
   D49        3.14154   0.00001   0.00000   0.00046   0.00046  -3.14118
   D50       -0.00004   0.00000   0.00000   0.00031   0.00031   0.00028
   D51       -0.00001   0.00000   0.00000   0.00017   0.00017   0.00016
   D52       -3.14159   0.00000   0.00000   0.00002   0.00002  -3.14157
   D53        0.00000   0.00000   0.00000   0.00000   0.00000   0.00000
   D54       -3.14159   0.00000   0.00000  -0.00008  -0.00008   3.14152
   D55        3.14158   0.00000   0.00000   0.00015   0.00015  -3.14146
   D56       -0.00001   0.00000   0.00000   0.00008   0.00008   0.00007
   D57        0.00000   0.00000   0.00000   0.00000   0.00000   0.00000
   D58       -3.14159   0.00000   0.00000  -0.00007  -0.00007   3.14153
   D59        3.14158   0.00000   0.00000   0.00015   0.00015  -3.14146
   D60       -0.00001   0.00000   0.00000   0.00008   0.00008   0.00007
   D61        0.00001   0.00000   0.00000  -0.00008  -0.00008  -0.00008
   D62       -3.14159   0.00000   0.00000  -0.00002  -0.00002   3.14158
   D63       -3.14159   0.00000   0.00000  -0.00001  -0.00001   3.14159
   D64       -0.00001   0.00000   0.00000   0.00006   0.00006   0.00005
         Item               Value     Threshold  Converged?
 Maximum Force            0.001750     0.000450     NO 
 RMS     Force            0.000385     0.000300     NO 
 Maximum Displacement     0.013007     0.001800     NO 
 RMS     Displacement     0.002187     0.001200     NO 
 Predicted change in Energy=-2.622924D-05
 Lowest energy point so far.  Saving SCF results.
 GradGradGradGradGradGradGradGradGradGradGradGradGradGradGradGradGradGrad

 Leave Link  103 at Wed Jan 08 20:49:35 2020, MaxMem=   134217728 cpu:         1.0
 (Enter E:\Gaussian\G09W\l202.exe)
                          Input orientation:                          
 ---------------------------------------------------------------------
 Center     Atomic      Atomic             Coordinates (Angstroms)
 Number     Number       Type             X           Y           Z
 ---------------------------------------------------------------------
      1          6           0       -2.796163    0.769723    0.000042
      2          6           0       -1.761102    1.697954    0.000010
      3          6           0       -0.431105    1.270578   -0.000120
      4          6           0       -0.143080   -0.107080   -0.000005
      5          6           0       -1.189841   -1.032550   -0.000075
      6          6           0       -2.510141   -0.597549   -0.000046
      7          1           0       -3.825791    1.108748    0.000077
      8          1           0       -1.968262    2.760742   -0.000050
      9          1           0       -0.953628   -2.089256   -0.000018
     10          1           0       -3.317417   -1.320947   -0.000032
     11          6           0        1.257791   -0.602443    0.000515
     12          8           0        1.514848   -1.797494   -0.000959
     13          6           0        0.654657    2.286890   -0.000716
     14          6           0        2.345738    0.417646    0.000040
     15          6           0        2.057510    1.792389   -0.000082
     16          6           0        3.671137   -0.020425    0.000039
     17          6           0        3.106840    2.714822    0.000083
     18          6           0        4.693717    0.916997    0.000110
     19          1           0        3.876920   -1.082396    0.000113
     20          6           0        4.427649    2.286749    0.000178
     21          1           0        2.877360    3.772893    0.000007
     22          1           0        5.237556    3.004983    0.000247
     23         35           0        6.509050    0.319417    0.000232
     24          8           0        0.407258    3.484882    0.000931
 ---------------------------------------------------------------------
                    Distance matrix (angstroms):
                    1          2          3          4          5
     1  C    0.000000
     2  C    1.390311   0.000000
     3  C    2.417510   1.396976   0.000000
     4  C    2.794214   2.424076   1.407445   0.000000
     5  C    2.414220   2.789622   2.424887   1.397212   0.000000
     6  C    1.396868   2.414621   2.795047   2.417341   1.390115
     7  H    1.084007   2.147115   3.398541   3.878220   3.396084
     8  H    2.156289   1.082790   2.140897   3.399366   3.872339
     9  H    3.401278   3.872334   3.400222   2.141497   1.082785
    10  H    2.154671   3.396451   3.879020   3.398512   2.147034
    11  C    4.279882   3.795463   2.522018   1.485875   2.485135
    12  O    5.017511   4.790616   3.633152   2.367747   2.810779
    13  C    3.769610   2.486511   1.487202   2.523386   3.797480
    14  C    5.153941   4.301782   2.904884   2.543532   3.821438
    15  C    4.960241   3.819779   2.542733   2.906988   4.304134
    16  C    6.515390   5.697548   4.300591   3.815202   4.965229
    17  C    6.215212   4.973015   3.821373   4.304081   5.701251
    18  C    7.491328   6.501890   5.137005   4.944021   6.198143
    19  H    6.925344   6.286305   4.908723   4.136622   5.067006
    20  C    7.381384   6.216696   4.963879   5.159650   6.524871
    21  H    6.419338   5.081408   4.148195   4.917037   6.295586
    22  H    8.338887   7.119659   5.928059   6.215801   7.590330
    23  Br   9.316103   8.384258   7.005031   6.665789   7.816696
    24  O    4.199286   2.809786   2.367699   3.633878   4.791442
                    6          7          8          9         10
     6  C    0.000000
     7  H    2.154618   0.000000
     8  H    3.401728   2.485860   0.000000
     9  H    2.155904   4.298435   4.954994   0.000000
    10  H    1.083974   2.482310   4.298885   2.485517   0.000000
    11  C    3.767936   5.363859   4.660304   2.664768   4.631283
    12  O    4.200048   6.080186   5.736686   2.485659   4.855706
    13  C    4.282048   4.632757   2.665378   4.662321   5.365991
    14  C    4.960865   6.210104   4.909246   4.143715   5.924022
    15  C    5.155118   5.922887   4.140597   4.912649   6.211497
    16  C    6.208162   7.581488   6.287902   5.066411   7.108534
    17  C    6.520911   7.116238   5.075309   6.290196   7.586732
    18  C    7.361346   8.521665   6.912406   6.397661   8.317852
    19  H    6.405437   8.008300   6.995417   4.934365   7.198291
    20  C    7.513462   8.337083   6.413450   6.935962   8.544093
    21  H    6.937286   7.213176   4.950202   7.002947   8.020130
    22  H    8.544299   9.259588   7.209956   8.017608   9.586513
    23  Br   9.065685  10.364940   8.821841   7.841764   9.962442
    24  O    5.017715   4.854351   2.483440   5.737859   6.080231
                   11         12         13         14         15
    11  C    0.000000
    12  O    1.222386   0.000000
    13  C    2.951612   4.173981   0.000000
    14  C    1.491378   2.365845   2.520680   0.000000
    15  C    2.524830   3.630667   1.487456   1.404633   0.000000
    16  C    2.482536   2.794201   3.797743   1.395919   2.426951
    17  C    3.797792   4.784917   2.489242   2.419978   1.397131
    18  C    3.756898   4.180152   4.265045   2.400491   2.777751
    19  H    2.662741   2.467944   4.662088   2.143512   3.402153
    20  C    4.288989   5.016518   3.772991   2.797838   2.421147
    21  H    4.665465   5.734601   2.673689   3.397103   2.143490
    22  H    5.371410   6.076376   4.638817   3.880325   3.403392
    23  Br   5.331561   5.424331   6.176153   4.164470   4.688908
    24  O    4.174881   5.397245   1.223272   3.628450   2.363866
                   16         17         18         19         20
    16  C    0.000000
    17  C    2.792850   0.000000
    18  C    1.387238   2.397990   0.000000
    19  H    1.081725   3.874518   2.159798   0.000000
    20  C    2.428037   1.388446   1.395355   3.413861   0.000000
    21  H    3.875480   1.082670   3.384567   4.957111   2.147561
    22  H    3.406870   2.150383   2.157649   4.307899   1.082501
    23  Br   2.858188   4.160890   1.911161   2.982145   2.864023
    24  O    4.789581   2.807264   4.996776   5.735729   4.195124
                   21         22         23         24
    21  H    0.000000
    22  H    2.481977   0.000000
    23  Br   5.011553   2.971357   0.000000
    24  O    2.486837   4.854079   6.874012   0.000000
 Stoichiometry    C14H7BrO2
 Framework group  C1[X(C14H7BrO2)]
 Deg. of freedom    66
 Full point group                 C1      NOp   1
 RotChk:  IX=2 Diff= 1.28D-04
 Largest Abelian subgroup         C1      NOp   1
 Largest concise Abelian subgroup C1      NOp   1
                         Standard orientation:                         
 ---------------------------------------------------------------------
 Center     Atomic      Atomic             Coordinates (Angstroms)
 Number     Number       Type             X           Y           Z
 ---------------------------------------------------------------------
      1          6           0       -5.087862    0.054720   -0.000014
      2          6           0       -4.052717    0.982858   -0.000047
      3          6           0       -2.722759    0.555361   -0.000177
      4          6           0       -2.434859   -0.822323   -0.000061
      5          6           0       -3.481703   -1.747698   -0.000132
      6          6           0       -4.801964   -1.312577   -0.000103
      7          1           0       -6.117459    0.393838    0.000020
      8          1           0       -4.259781    2.045665   -0.000106
      9          1           0       -3.245586   -2.804425   -0.000075
     10          1           0       -5.609305   -2.035903   -0.000089
     11          6           0       -1.034032   -1.317812    0.000458
     12          8           0       -0.777083   -2.512886   -0.001016
     13          6           0       -1.636905    1.571575   -0.000772
     14          6           0        0.054007   -0.297822   -0.000017
     15          6           0       -0.234097    1.076948   -0.000139
     16          6           0        1.379367   -0.736012   -0.000017
     17          6           0        0.815316    1.999286    0.000026
     18          6           0        2.402031    0.201317    0.000053
     19          1           0        1.585053   -1.798002    0.000056
     20          6           0        2.136087    1.571094    0.000121
     21          1           0        0.585933    3.057378   -0.000050
     22          1           0        2.946059    2.289254    0.000190
     23         35           0        4.217310   -0.396426    0.000175
     24          8           0       -1.884196    2.769590    0.000874
 ---------------------------------------------------------------------
 Rotational constants (GHZ):      1.0089344      0.1766110      0.1503012
 Leave Link  202 at Wed Jan 08 20:49:35 2020, MaxMem=   134217728 cpu:         0.0
 (Enter E:\Gaussian\G09W\l301.exe)
 Standard basis: 6-311+G(d) (5D, 7F)
 Ernie: Thresh=  0.10000D-02 Tol=  0.10000D-05 Strict=F.
 There are   440 symmetry adapted cartesian basis functions of A   symmetry.
 There are   421 symmetry adapted basis functions of A   symmetry.
   421 basis functions,   705 primitive gaussians,   440 cartesian basis functions
    71 alpha electrons       71 beta electrons
       nuclear repulsion energy      1372.4624874833 Hartrees.
 IExCor=  402 DFT=T Ex+Corr=B3LYP ExCW=0 ScaHFX=  0.200000
 ScaDFX=  0.800000  0.720000  1.000000  0.810000 ScalE2=  1.000000  1.000000
 IRadAn=      0 IRanWt=     -1 IRanGd=            0 ICorTp=0 IEmpDi=141
 NAtoms=   24 NActive=   24 NUniq=   24 SFac= 1.00D+00 NAtFMM=   60 NAOKFM=F Big=F
 Integral buffers will be    262144 words long.
 Raffenetti 2 integral format.
 Two-electron integral symmetry is turned on.
 R6Disp:  Grimme-D3(BJ) Dispersion energy=       -0.0618833663 Hartrees.
 Nuclear repulsion after empirical dispersion term =     1372.4006041170 Hartrees.
 ------------------------------------------------------------------------------
 Polarizable Continuum Model (PCM)
 =================================
 Model                : PCM (using non-symmetric T matrix).
 Atomic radii         : UFF (Universal Force Field).
 Polarization charges : Total charges.
 Charge compensation  : None.
 Solution method      : On-the-fly selection.
 Cavity type          : Scaled VdW (van der Waals Surface) (Alpha=1.100).
 Cavity algorithm     : GePol (No added spheres)
                        Default sphere list used, NSphG=   24.
                        Lebedev-Laikov grids with approx.  5.0 points / Ang**2.
                        Smoothing algorithm: Karplus/York (Gamma=1.0000).
                        Polarization charges: spherical gaussians, with
                                              point-specific exponents (IZeta= 3).
                        Self-potential: point-specific (ISelfS= 7).
                        Self-field    : sphere-specific E.n sum rule (ISelfD= 2).
 1st derivatives      : Analytical E(r).r(x)/FMM algorithm (CHGder, D1EAlg=3).
                        Cavity 1st derivative terms included.
 Solvent              : Acetonitrile, Eps=  35.688000 Eps(inf)=   1.806874
 ------------------------------------------------------------------------------
 GePol: Number of generator spheres                  =      24
 GePol: Total number of spheres                      =      24
 GePol: Number of exposed spheres                    =      24 (100.00%)
 GePol: Number of points                             =    2170
 GePol: Average weight of points                     =       0.13
 GePol: Minimum weight of points                     =   0.24D-09
 GePol: Maximum weight of points                     =    0.20577
 GePol: Number of points with low weight             =     135
 GePol: Fraction of low-weight points (<1% of avg)   =       6.22%
 GePol: Cavity surface area                          =    279.567 Ang**2
 GePol: Cavity volume                                =    305.333 Ang**3
 Leave Link  301 at Wed Jan 08 20:49:36 2020, MaxMem=   134217728 cpu:         0.0
 (Enter E:\Gaussian\G09W\l302.exe)
 NPDir=0 NMtPBC=     1 NCelOv=     1 NCel=       1 NClECP=     1 NCelD=      1
         NCelK=      1 NCelE2=     1 NClLst=     1 CellRange=     0.0.
 One-electron integrals computed using PRISM.
 NBasis=   421 RedAO= T EigKep=  1.61D-06  NBF=   421
 NBsUse=   415 1.00D-06 EigRej=  6.70D-07 NBFU=   415
 Precomputing XC quadrature grid using
 IXCGrd= 4 IRadAn=           0 IRanWt=          -1 IRanGd=           0 AccXCQ= 0.00D+00.
 Generated NRdTot=       0 NPtTot=           0 NUsed=           0 NTot=          16
 NSgBfM=   431   431   431   431   431 MxSgAt=    24 MxSgA2=    24.
 Leave Link  302 at Wed Jan 08 20:49:41 2020, MaxMem=   134217728 cpu:         5.0
 (Enter E:\Gaussian\G09W\l303.exe)
 DipDrv:  MaxL=1.
 Leave Link  303 at Wed Jan 08 20:49:41 2020, MaxMem=   134217728 cpu:         0.0
 (Enter E:\Gaussian\G09W\l401.exe)
 Initial guess from the checkpoint file:  "E:\Gaussian file\2-BrAQ ground state opt.chk"
 B after Tr=     0.000000    0.000000    0.000000
         Rot=    1.000000   -0.000055    0.000014    0.000027 Ang=  -0.01 deg.
 Guess basis will be translated and rotated to current coordinates.
 JPrj=2 DoOrth=T DoCkMO=T.
 Leave Link  401 at Wed Jan 08 20:49:43 2020, MaxMem=   134217728 cpu:         2.0
 (Enter E:\Gaussian\G09W\l502.exe)
 Closed shell SCF:
 Using DIIS extrapolation, IDIIS=  1040.
 Integral symmetry usage will be decided dynamically.
 IVT=      604602 IEndB=      604602 NGot=   134217728 MDV=   133823807
 LenX=   133823807 LenY=   133629766
 Requested convergence on RMS density matrix=1.00D-08 within 128 cycles.
 Requested convergence on MAX density matrix=1.00D-06.
 Requested convergence on             energy=1.00D-06.
 No special actions if energy rises.
 Fock matrices will be formed incrementally for  20 cycles.

 Cycle   1  Pass 1  IDiag  1:
 FoFJK:  IHMeth= 1 ICntrl=       0 DoSepK=F KAlg= 0 I1Cent=   0 FoldK=F
 IRaf= 830000000 NMat=   1 IRICut=       1 DoRegI=T DoRafI=F ISym2E= 0.
 FoFCou: FMM=F IPFlag=           0 FMFlag=      100000 FMFlg1=           0
         NFxFlg=           0 DoJE=F BraDBF=F KetDBF=F FulRan=T
         wScrn=  0.000000 ICntrl=       0 IOpCl=  0 I1Cent=           0 NGrid=           0
         NMat0=    1 NMatS0=      1 NMatT0=    0 NMatD0=    1 NMtDS0=    0 NMtDT0=    0
 Symmetry not used in FoFCou.
 Inv3:  Mode=1 IEnd=    14126700.
 Iteration    1 A*A^-1 deviation from unit magnitude is 2.44D-15 for    317.
 Iteration    1 A*A^-1 deviation from orthogonality  is 2.06D-15 for   1455   1250.
 Iteration    1 A^-1*A deviation from unit magnitude is 2.66D-15 for    713.
 Iteration    1 A^-1*A deviation from orthogonality  is 1.72D-13 for   1618   1451.
 E= -3262.55359052285    
 DIIS: error= 3.02D-04 at cycle   1 NSaved=   1.
 NSaved= 1 IEnMin= 1 EnMin= -3262.55359052285     IErMin= 1 ErrMin= 3.02D-04
 ErrMax= 3.02D-04  0.00D+00 EMaxC= 1.00D-01 BMatC= 3.29D-05 BMatP= 3.29D-05
 IDIUse=3 WtCom= 9.97D-01 WtEn= 3.02D-03
 Coeff-Com:  0.100D+01
 Coeff-En:   0.100D+01
 Coeff:      0.100D+01
 Gap=     0.410 Goal=   None    Shift=    0.000
 RMSDP=2.62D-04 MaxDP=1.48D-02              OVMax= 1.48D-03

 Cycle   2  Pass 1  IDiag  1:
 RMSU=  2.40D-04    CP:  1.00D+00
 E= -3262.55361504454     Delta-E=       -0.000024521694 Rises=F Damp=F
 DIIS: error= 1.26D-04 at cycle   2 NSaved=   2.
 NSaved= 2 IEnMin= 2 EnMin= -3262.55361504454     IErMin= 2 ErrMin= 1.26D-04
 ErrMax= 1.26D-04  0.00D+00 EMaxC= 1.00D-01 BMatC= 3.65D-06 BMatP= 3.29D-05
 IDIUse=3 WtCom= 9.99D-01 WtEn= 1.26D-03
 Coeff-Com:  0.128D+00 0.872D+00
 Coeff-En:   0.000D+00 0.100D+01
 Coeff:      0.127D+00 0.873D+00
 Gap=     0.145 Goal=   None    Shift=    0.000
 RMSDP=3.38D-05 MaxDP=1.05D-03 DE=-2.45D-05 OVMax= 1.28D-03

 Cycle   3  Pass 1  IDiag  1:
 RMSU=  3.28D-05    CP:  1.00D+00  9.70D-01
 E= -3262.55360916329     Delta-E=        0.000005881252 Rises=F Damp=F
 DIIS: error= 2.31D-04 at cycle   3 NSaved=   3.
 NSaved= 3 IEnMin= 2 EnMin= -3262.55361504454     IErMin= 2 ErrMin= 1.26D-04
 ErrMax= 2.31D-04  0.00D+00 EMaxC= 1.00D-01 BMatC= 1.09D-05 BMatP= 3.65D-06
 IDIUse=3 WtCom= 3.97D-01 WtEn= 6.03D-01
 Coeff-Com: -0.592D-02 0.640D+00 0.366D+00
 Coeff-En:   0.000D+00 0.694D+00 0.306D+00
 Coeff:     -0.235D-02 0.672D+00 0.330D+00
 Gap=     0.145 Goal=   None    Shift=    0.000
 RMSDP=2.78D-05 MaxDP=1.58D-03 DE= 5.88D-06 OVMax= 8.40D-04

 Cycle   4  Pass 1  IDiag  1:
 RMSU=  1.01D-05    CP:  1.00D+00  1.01D+00  5.04D-01
 E= -3262.55361809139     Delta-E=       -0.000008928100 Rises=F Damp=F
 DIIS: error= 1.96D-05 at cycle   4 NSaved=   4.
 NSaved= 4 IEnMin= 4 EnMin= -3262.55361809139     IErMin= 4 ErrMin= 1.96D-05
 ErrMax= 1.96D-05  0.00D+00 EMaxC= 1.00D-01 BMatC= 1.40D-07 BMatP= 3.65D-06
 IDIUse=1 WtCom= 1.00D+00 WtEn= 0.00D+00
 Coeff-Com: -0.606D-02 0.288D+00 0.119D+00 0.599D+00
 Coeff:     -0.606D-02 0.288D+00 0.119D+00 0.599D+00
 Gap=     0.145 Goal=   None    Shift=    0.000
 RMSDP=5.16D-06 MaxDP=2.59D-04 DE=-8.93D-06 OVMax= 1.24D-04

 Cycle   5  Pass 1  IDiag  1:
 RMSU=  3.45D-06    CP:  1.00D+00  1.01D+00  4.18D-01  9.23D-01
 E= -3262.55361821765     Delta-E=       -0.000000126264 Rises=F Damp=F
 DIIS: error= 5.20D-06 at cycle   5 NSaved=   5.
 NSaved= 5 IEnMin= 5 EnMin= -3262.55361821765     IErMin= 5 ErrMin= 5.20D-06
 ErrMax= 5.20D-06  0.00D+00 EMaxC= 1.00D-01 BMatC= 2.03D-08 BMatP= 1.40D-07
 IDIUse=1 WtCom= 1.00D+00 WtEn= 0.00D+00
 Coeff-Com: -0.264D-02 0.816D-01 0.247D-01 0.347D+00 0.550D+00
 Coeff:     -0.264D-02 0.816D-01 0.247D-01 0.347D+00 0.550D+00
 Gap=     0.145 Goal=   None    Shift=    0.000
 RMSDP=1.82D-06 MaxDP=1.67D-04 DE=-1.26D-07 OVMax= 4.06D-05

 Cycle   6  Pass 1  IDiag  1:
 RMSU=  1.13D-06    CP:  1.00D+00  1.01D+00  4.28D-01  9.21D-01  8.08D-01
 E= -3262.55361823629     Delta-E=       -0.000000018636 Rises=F Damp=F
 DIIS: error= 1.56D-06 at cycle   6 NSaved=   6.
 NSaved= 6 IEnMin= 6 EnMin= -3262.55361823629     IErMin= 6 ErrMin= 1.56D-06
 ErrMax= 1.56D-06  0.00D+00 EMaxC= 1.00D-01 BMatC= 1.19D-09 BMatP= 2.03D-08
 IDIUse=1 WtCom= 1.00D+00 WtEn= 0.00D+00
 Coeff-Com: -0.713D-03 0.113D-01 0.232D-02 0.106D+00 0.260D+00 0.621D+00
 Coeff:     -0.713D-03 0.113D-01 0.232D-02 0.106D+00 0.260D+00 0.621D+00
 Gap=     0.145 Goal=   None    Shift=    0.000
 RMSDP=4.93D-07 MaxDP=2.80D-05 DE=-1.86D-08 OVMax= 1.16D-05

 Cycle   7  Pass 1  IDiag  1:
 RMSU=  3.26D-07    CP:  1.00D+00  1.01D+00  4.32D-01  9.17D-01  7.47D-01
                    CP:  9.34D-01
 E= -3262.55361823731     Delta-E=       -0.000000001022 Rises=F Damp=F
 DIIS: error= 6.96D-07 at cycle   7 NSaved=   7.
 NSaved= 7 IEnMin= 7 EnMin= -3262.55361823731     IErMin= 7 ErrMin= 6.96D-07
 ErrMax= 6.96D-07  0.00D+00 EMaxC= 1.00D-01 BMatC= 1.87D-10 BMatP= 1.19D-09
 IDIUse=1 WtCom= 1.00D+00 WtEn= 0.00D+00
 Coeff-Com: -0.900D-04-0.372D-02-0.207D-02 0.211D-01 0.856D-01 0.347D+00
 Coeff-Com:  0.552D+00
 Coeff:     -0.900D-04-0.372D-02-0.207D-02 0.211D-01 0.856D-01 0.347D+00
 Coeff:      0.552D+00
 Gap=     0.145 Goal=   None    Shift=    0.000
 RMSDP=1.85D-07 MaxDP=1.67D-05 DE=-1.02D-09 OVMax= 7.00D-06

 Cycle   8  Pass 1  IDiag  1:
 RMSU=  1.18D-07    CP:  1.00D+00  1.01D+00  4.33D-01  9.22D-01  7.40D-01
                    CP:  9.18D-01  8.56D-01
 E= -3262.55361823746     Delta-E=       -0.000000000146 Rises=F Damp=F
 DIIS: error= 2.21D-07 at cycle   8 NSaved=   8.
 NSaved= 8 IEnMin= 8 EnMin= -3262.55361823746     IErMin= 8 ErrMin= 2.21D-07
 ErrMax= 2.21D-07  0.00D+00 EMaxC= 1.00D-01 BMatC= 2.23D-11 BMatP= 1.87D-10
 IDIUse=1 WtCom= 1.00D+00 WtEn= 0.00D+00
 Coeff-Com:  0.378D-04-0.374D-02-0.182D-02-0.130D-02 0.141D-01 0.109D+00
 Coeff-Com:  0.305D+00 0.578D+00
 Coeff:      0.378D-04-0.374D-02-0.182D-02-0.130D-02 0.141D-01 0.109D+00
 Coeff:      0.305D+00 0.578D+00
 Gap=     0.145 Goal=   None    Shift=    0.000
 RMSDP=6.66D-08 MaxDP=2.86D-06 DE=-1.46D-10 OVMax= 1.28D-06

 Cycle   9  Pass 1  IDiag  1:
 RMSU=  3.67D-08    CP:  1.00D+00  1.01D+00  4.32D-01  9.24D-01  7.37D-01
                    CP:  9.23D-01  9.32D-01  9.20D-01
 E= -3262.55361823752     Delta-E=       -0.000000000060 Rises=F Damp=F
 DIIS: error= 9.91D-08 at cycle   9 NSaved=   9.
 NSaved= 9 IEnMin= 9 EnMin= -3262.55361823752     IErMin= 9 ErrMin= 9.91D-08
 ErrMax= 9.91D-08  0.00D+00 EMaxC= 1.00D-01 BMatC= 1.77D-12 BMatP= 2.23D-11
 IDIUse=1 WtCom= 1.00D+00 WtEn= 0.00D+00
 Coeff-Com:  0.236D-04-0.152D-02-0.814D-03-0.144D-02 0.177D-02 0.327D-01
 Coeff-Com:  0.123D+00 0.288D+00 0.558D+00
 Coeff:      0.236D-04-0.152D-02-0.814D-03-0.144D-02 0.177D-02 0.327D-01
 Coeff:      0.123D+00 0.288D+00 0.558D+00
 Gap=     0.145 Goal=   None    Shift=    0.000
 RMSDP=1.87D-08 MaxDP=1.05D-06 DE=-6.00D-11 OVMax= 6.92D-07

 Cycle  10  Pass 1  IDiag  1:
 RMSU=  1.12D-08    CP:  1.00D+00  1.01D+00  4.32D-01  9.24D-01  7.38D-01
                    CP:  9.28D-01  9.37D-01  9.24D-01  9.16D-01
 E= -3262.55361823747     Delta-E=        0.000000000052 Rises=F Damp=F
 DIIS: error= 4.59D-08 at cycle  10 NSaved=  10.
 NSaved=10 IEnMin= 9 EnMin= -3262.55361823752     IErMin=10 ErrMin= 4.59D-08
 ErrMax= 4.59D-08  0.00D+00 EMaxC= 1.00D-01 BMatC= 4.38D-13 BMatP= 1.77D-12
 IDIUse=1 WtCom= 1.00D+00 WtEn= 0.00D+00
 Coeff-Com:  0.797D-05-0.240D-03-0.181D-03-0.749D-03-0.223D-02-0.219D-02
 Coeff-Com:  0.184D-01 0.664D-01 0.356D+00 0.565D+00
 Coeff:      0.797D-05-0.240D-03-0.181D-03-0.749D-03-0.223D-02-0.219D-02
 Coeff:      0.184D-01 0.664D-01 0.356D+00 0.565D+00
 Gap=     0.145 Goal=   None    Shift=    0.000
 RMSDP=8.49D-09 MaxDP=6.38D-07 DE= 5.18D-11 OVMax= 1.93D-07

 Error on total polarization charges =  0.01852
 SCF Done:  E(RB3LYP) =  -3262.55361824     A.U. after   10 cycles
            NFock= 10  Conv=0.85D-08     -V/T= 2.0018
 KE= 3.256669306331D+03 PE=-1.050047981270D+04 EE= 2.608856284018D+03
 Leave Link  502 at Wed Jan 08 21:11:08 2020, MaxMem=   134217728 cpu:      1285.0
 (Enter E:\Gaussian\G09W\l701.exe)
 Compute integral first derivatives.
 ... and contract with generalized density number  0.
 R6Disp: Adding Grimme-D3(BJ) dispersion energy 1st derivatives to the gradient.
 D1PCM: PCM CHGder 1st derivatives, ID1Alg=3 FixD1E=F DoIter=F DoCFld=F I1PDM=0.
 GePol: Maximum number of non-zero 1st derivatives   =     349
 Leave Link  701 at Wed Jan 08 21:11:40 2020, MaxMem=   134217728 cpu:        32.0
 (Enter E:\Gaussian\G09W\l702.exe)
 L702 exits ... SP integral derivatives will be done elsewhere.
 Leave Link  702 at Wed Jan 08 21:11:40 2020, MaxMem=   134217728 cpu:         0.0
 (Enter E:\Gaussian\G09W\l703.exe)
 Compute integral first derivatives, UseDBF=F ICtDFT=           0.
 Integral derivatives from FoFJK, PRISM(SPDF).
 Calling FoFJK, ICntrl=      2127 FMM=F ISym2X=0 I1Cent= 0 IOpClX= 0 NMat=1 NMatS=1 NMatT=0.
 FoFJK:  IHMeth= 1 ICntrl=    2127 DoSepK=F KAlg= 0 I1Cent=   0 FoldK=F
 IRaf=         0 NMat=   1 IRICut=       1 DoRegI=T DoRafI=F ISym2E= 0.
 FoFCou: FMM=F IPFlag=           0 FMFlag=      100000 FMFlg1=         800
         NFxFlg=           0 DoJE=F BraDBF=F KetDBF=F FulRan=T
         wScrn=  0.000000 ICntrl=    2127 IOpCl=  0 I1Cent=           0 NGrid=           0
         NMat0=    1 NMatS0=      1 NMatT0=    0 NMatD0=    1 NMtDS0=    0 NMtDT0=    0
 Symmetry not used in FoFCou.
 Leave Link  703 at Wed Jan 08 21:19:23 2020, MaxMem=   134217728 cpu:       463.0
 (Enter E:\Gaussian\G09W\l716.exe)
 Dipole        =-8.85854238D-01 1.94720660D-01-5.27801918D-05
 ***** Axes restored to original set *****
 -------------------------------------------------------------------
 Center     Atomic                   Forces (Hartrees/Bohr)
 Number     Number              X              Y              Z
 -------------------------------------------------------------------
      1        6          -0.000088016   -0.000006566    0.000005773
      2        6           0.000057851    0.000023077   -0.000021178
      3        6           0.000055525    0.000394692   -0.000082800
      4        6           0.000221642   -0.000339520    0.000069435
      5        6           0.000060264   -0.000015557    0.000021882
      6        6          -0.000077033   -0.000054076   -0.000005282
      7        1          -0.000010789   -0.000017081    0.000003493
      8        1          -0.000067452   -0.000041730   -0.000003257
      9        1          -0.000058924    0.000001118    0.000003218
     10        1          -0.000004939   -0.000013623   -0.000003627
     11        6          -0.000293158    0.001277716   -0.000308353
     12        8           0.000204920   -0.000829692    0.000110182
     13        6           0.000366307   -0.001325528    0.000349141
     14        6          -0.000059642   -0.000427078    0.000071262
     15        6          -0.000338014    0.000360653   -0.000084885
     16        6          -0.000250189   -0.000064472    0.000019648
     17        6          -0.000019336    0.000030763   -0.000020354
     18        6           0.000213210   -0.000008252   -0.000003941
     19        1           0.000096854    0.000066376    0.000002971
     20        6          -0.000067321    0.000174550    0.000004595
     21        1           0.000027110   -0.000002773   -0.000002273
     22        1           0.000013210   -0.000022671    0.000002727
     23       35           0.000225379   -0.000055198   -0.000002429
     24        8          -0.000207458    0.000894873   -0.000125949
 -------------------------------------------------------------------
 Cartesian Forces:  Max     0.001325528 RMS     0.000299554
 Leave Link  716 at Wed Jan 08 21:19:23 2020, MaxMem=   134217728 cpu:         0.0
 (Enter E:\Gaussian\G09W\l103.exe)

 GradGradGradGradGradGradGradGradGradGradGradGradGradGradGradGradGradGrad
 Berny optimization.
 Using GEDIIS/GDIIS optimizer.
 FormGI is forming the generalized inverse of G from B-inverse, IUseBI=4.
 Internal  Forces:  Max     0.000918264 RMS     0.000131152
 Search for a local minimum.
 Step number   2 out of a maximum of  142
 All quantities printed in internal units (Hartrees-Bohrs-Radians)
 RMS Force = .13115D-03 SwitMx=.10000D-02 MixMth= 2
 Mixed Optimization -- En-DIIS/RFO-DIIS
 Swapping is turned off.
 Update second derivatives using D2CorX and points    1    2
 DE= -2.72D-05 DEPred=-2.62D-05 R= 1.04D+00
 TightC=F SS=  1.41D+00  RLast= 1.54D-02 DXNew= 5.0454D-01 4.6070D-02
 Trust test= 1.04D+00 RLast= 1.54D-02 DXMaxT set to 3.00D-01
 ITU=  1  0
     Eigenvalues ---    0.00891   0.00893   0.00937   0.01456   0.01537
     Eigenvalues ---    0.01669   0.01728   0.01803   0.01857   0.02148
     Eigenvalues ---    0.02148   0.02161   0.02165   0.02169   0.02171
     Eigenvalues ---    0.02177   0.02186   0.02191   0.02193   0.02199
     Eigenvalues ---    0.02216   0.15099   0.16000   0.16000   0.16000
     Eigenvalues ---    0.16000   0.16000   0.16007   0.18402   0.22000
     Eigenvalues ---    0.22436   0.22611   0.23773   0.24431   0.24509
     Eigenvalues ---    0.24827   0.25000   0.25000   0.25000   0.25000
     Eigenvalues ---    0.25048   0.30507   0.31979   0.32669   0.33425
     Eigenvalues ---    0.35477   0.35497   0.35592   0.35611   0.35625
     Eigenvalues ---    0.35664   0.35741   0.39144   0.41599   0.42266
     Eigenvalues ---    0.42529   0.44804   0.45430   0.46071   0.46688
     Eigenvalues ---    0.46711   0.46940   0.47158   0.49800   0.87644
     Eigenvalues ---    0.94571
 En-DIIS/RFO-DIIS IScMMF=        0 using points:     2    1
 RFO step:  Lambda=-3.49173814D-06.
 NNeg= 0 NP= 2 Switch=  2.50D-03 Rises=F DC=  2.72D-05 SmlDif=  1.00D-05
 RMS Error=  0.2617972081D-03 NUsed= 2 EDIIS=F
 DidBck=F Rises=F RFO-DIIS coefs:    1.04507   -0.04507
 Iteration  1 RMS(Cart)=  0.00105790 RMS(Int)=  0.00000427
 Iteration  2 RMS(Cart)=  0.00000364 RMS(Int)=  0.00000248
 Iteration  3 RMS(Cart)=  0.00000000 RMS(Int)=  0.00000248
 ITry= 1 IFail=0 DXMaxC= 6.43D-03 DCOld= 1.00D+10 DXMaxT= 3.00D-01 DXLimC= 3.00D+00 Rises=F
 Variable       Old X    -DE/DX   Delta X   Delta X   Delta X     New X
                                 (Linear)    (Quad)   (Total)
    R1        2.62731   0.00009  -0.00002   0.00014   0.00012   2.62742
    R2        2.63970   0.00002  -0.00002  -0.00001  -0.00003   2.63967
    R3        2.04848   0.00001  -0.00003  -0.00005  -0.00008   2.04839
    R4        2.63990   0.00009  -0.00005   0.00007   0.00003   2.63993
    R5        2.04618  -0.00002  -0.00003  -0.00016  -0.00019   2.04598
    R6        2.65968   0.00016  -0.00006   0.00023   0.00017   2.65985
    R7        2.81040  -0.00014  -0.00020  -0.00099  -0.00118   2.80922
    R8        2.64035   0.00010  -0.00005   0.00009   0.00004   2.64039
    R9        2.80790  -0.00015  -0.00020  -0.00103  -0.00123   2.80666
   R10        2.62694   0.00008  -0.00002   0.00012   0.00010   2.62704
   R11        2.04617  -0.00002  -0.00003  -0.00016  -0.00019   2.04597
   R12        2.04841   0.00001  -0.00003  -0.00005  -0.00008   2.04833
   R13        2.30997   0.00085   0.00008   0.00116   0.00123   2.31121
   R14        2.81830  -0.00015  -0.00020  -0.00104  -0.00124   2.81705
   R15        2.81088  -0.00022  -0.00021  -0.00127  -0.00148   2.80941
   R16        2.31165   0.00092   0.00008   0.00125   0.00133   2.31298
   R17        2.65437   0.00017  -0.00004   0.00029   0.00025   2.65463
   R18        2.63790   0.00012  -0.00006   0.00010   0.00004   2.63795
   R19        2.64020   0.00010  -0.00003   0.00014   0.00010   2.64030
   R20        2.62150   0.00024  -0.00004   0.00042   0.00038   2.62188
   R21        2.04416  -0.00004  -0.00003  -0.00019  -0.00022   2.04394
   R22        2.62378   0.00010  -0.00004   0.00010   0.00007   2.62385
   R23        2.04595  -0.00002  -0.00003  -0.00014  -0.00017   2.04578
   R24        2.63684   0.00016  -0.00004   0.00024   0.00019   2.63703
   R25        3.61157   0.00023  -0.00028   0.00061   0.00032   3.61189
   R26        2.04563  -0.00001  -0.00002  -0.00008  -0.00010   2.04553
    A1        2.09562   0.00000   0.00000  -0.00003  -0.00003   2.09558
    A2        2.09247   0.00001   0.00001   0.00008   0.00009   2.09256
    A3        2.09510  -0.00001  -0.00001  -0.00005  -0.00006   2.09504
    A4        2.09964   0.00004  -0.00001   0.00013   0.00012   2.09976
    A5        2.10933  -0.00009  -0.00007  -0.00072  -0.00079   2.10854
    A6        2.07422   0.00005   0.00008   0.00059   0.00067   2.07489
    A7        2.08781  -0.00004   0.00001  -0.00010  -0.00009   2.08772
    A8        2.07831   0.00012  -0.00001   0.00047   0.00046   2.07877
    A9        2.11707  -0.00009   0.00000  -0.00037  -0.00037   2.11670
   A10        2.08867  -0.00003   0.00001  -0.00007  -0.00005   2.08862
   A11        2.11678  -0.00009   0.00000  -0.00040  -0.00040   2.11639
   A12        2.07773   0.00012  -0.00001   0.00047   0.00045   2.07818
   A13        2.09935   0.00003  -0.00001   0.00013   0.00012   2.09946
   A14        2.07485   0.00005   0.00008   0.00057   0.00065   2.07550
   A15        2.10899  -0.00008  -0.00007  -0.00070  -0.00076   2.10823
   A16        2.09529  -0.00001   0.00000  -0.00006  -0.00006   2.09522
   A17        2.09523   0.00000  -0.00001  -0.00004  -0.00004   2.09519
   A18        2.09267   0.00001   0.00001   0.00010   0.00011   2.09277
   A19        2.12256  -0.00007  -0.00001  -0.00031  -0.00033   2.12223
   A20        2.04849   0.00018   0.00000   0.00077   0.00077   2.04925
   A21        2.11214  -0.00011   0.00000  -0.00044  -0.00045   2.11169
   A22        2.05032   0.00017   0.00001   0.00073   0.00073   2.05106
   A23        2.11952  -0.00010  -0.00001  -0.00045  -0.00048   2.11904
   A24        2.11334  -0.00007   0.00001  -0.00026  -0.00027   2.11307
   A25        2.11735  -0.00010   0.00000  -0.00045  -0.00045   2.11690
   A26        2.06916   0.00013  -0.00001   0.00052   0.00051   2.06966
   A27        2.09668  -0.00002   0.00001  -0.00007  -0.00006   2.09662
   A28        2.11636  -0.00006  -0.00001  -0.00028  -0.00029   2.11607
   A29        2.08157   0.00010  -0.00001   0.00042   0.00040   2.08196
   A30        2.08526  -0.00004   0.00002  -0.00013  -0.00011   2.08515
   A31        2.08040   0.00009  -0.00005   0.00028   0.00023   2.08063
   A32        2.08141   0.00006   0.00012   0.00080   0.00092   2.08234
   A33        2.12137  -0.00015  -0.00007  -0.00108  -0.00115   2.12022
   A34        2.10705   0.00005  -0.00001   0.00017   0.00016   2.10721
   A35        2.07835   0.00001   0.00008   0.00035   0.00043   2.07878
   A36        2.09779  -0.00006  -0.00007  -0.00052  -0.00059   2.09720
   A37        2.12092  -0.00013   0.00007  -0.00036  -0.00029   2.12063
   A38        2.08160   0.00007  -0.00003   0.00021   0.00017   2.08178
   A39        2.08066   0.00006  -0.00004   0.00015   0.00011   2.08078
   A40        2.07607   0.00005  -0.00004   0.00011   0.00007   2.07614
   A41        2.10270   0.00001   0.00005   0.00030   0.00035   2.10305
   A42        2.10442  -0.00007  -0.00001  -0.00041  -0.00042   2.10400
    D1        0.00001   0.00000   0.00000  -0.00007  -0.00007  -0.00006
    D2        3.14146   0.00001  -0.00001   0.00048   0.00047  -3.14126
    D3       -3.14152  -0.00001   0.00000  -0.00030  -0.00030   3.14137
    D4       -0.00007   0.00000   0.00000   0.00025   0.00025   0.00018
    D5        0.00008   0.00000   0.00000  -0.00021  -0.00021  -0.00013
    D6       -3.14158   0.00000   0.00000   0.00001   0.00001  -3.14157
    D7       -3.14158   0.00000   0.00000   0.00001   0.00002  -3.14156
    D8       -0.00005   0.00000   0.00000   0.00024   0.00024   0.00018
    D9       -0.00017   0.00001  -0.00001   0.00064   0.00063   0.00046
   D10        3.14116   0.00002  -0.00002   0.00148   0.00146  -3.14056
   D11        3.14156   0.00000   0.00000   0.00010   0.00010  -3.14153
   D12       -0.00029   0.00001  -0.00001   0.00094   0.00093   0.00064
   D13        0.00026  -0.00002   0.00001  -0.00093  -0.00092  -0.00066
   D14       -3.14108  -0.00003   0.00003  -0.00174  -0.00171   3.14039
   D15       -3.14107  -0.00003   0.00003  -0.00179  -0.00176   3.14035
   D16        0.00078  -0.00004   0.00004  -0.00260  -0.00256  -0.00178
   D17        3.14102   0.00003  -0.00003   0.00203   0.00200  -3.14017
   D18        0.00194  -0.00007   0.00013  -0.00739  -0.00726  -0.00532
   D19       -0.00084   0.00004  -0.00004   0.00288   0.00284   0.00201
   D20       -3.13992  -0.00006   0.00011  -0.00653  -0.00642   3.13685
   D21       -0.00018   0.00001  -0.00001   0.00065   0.00064   0.00047
   D22        3.14156   0.00000   0.00000   0.00011   0.00011  -3.14151
   D23        3.14117   0.00002  -0.00002   0.00144   0.00142  -3.14060
   D24       -0.00028   0.00001  -0.00001   0.00091   0.00089   0.00061
   D25       -3.14008  -0.00005   0.00010  -0.00577  -0.00567   3.13744
   D26       -0.00066   0.00003  -0.00003   0.00210   0.00206   0.00141
   D27        0.00177  -0.00006   0.00012  -0.00658  -0.00646  -0.00469
   D28        3.14119   0.00002  -0.00002   0.00129   0.00127  -3.14072
   D29        0.00001   0.00000   0.00000  -0.00008  -0.00008  -0.00007
   D30       -3.14152  -0.00001   0.00000  -0.00030  -0.00030   3.14137
   D31        3.14146   0.00001  -0.00001   0.00047   0.00046  -3.14127
   D32       -0.00007   0.00000   0.00000   0.00024   0.00024   0.00017
   D33        0.00065  -0.00003   0.00003  -0.00208  -0.00205  -0.00140
   D34       -3.14121  -0.00002   0.00002  -0.00123  -0.00121   3.14077
   D35        3.14009   0.00005  -0.00010   0.00574   0.00564  -3.13746
   D36       -0.00177   0.00006  -0.00012   0.00659   0.00647   0.00470
   D37        0.00083  -0.00004   0.00004  -0.00286  -0.00282  -0.00199
   D38       -3.14102  -0.00003   0.00003  -0.00203  -0.00200   3.14016
   D39        3.13992   0.00006  -0.00011   0.00652   0.00640  -3.13686
   D40       -0.00193   0.00007  -0.00013   0.00735   0.00723   0.00529
   D41       -0.00076   0.00004  -0.00004   0.00255   0.00252   0.00175
   D42        3.14109   0.00003  -0.00003   0.00172   0.00169  -3.14041
   D43        3.14110   0.00003  -0.00002   0.00169   0.00167  -3.14042
   D44       -0.00024   0.00002  -0.00001   0.00085   0.00084   0.00061
   D45       -3.14117  -0.00002   0.00002  -0.00143  -0.00141   3.14061
   D46        0.00028  -0.00001   0.00001  -0.00092  -0.00090  -0.00062
   D47        0.00016  -0.00001   0.00001  -0.00059  -0.00058  -0.00042
   D48       -3.14157   0.00000   0.00000  -0.00008  -0.00007   3.14154
   D49       -3.14118  -0.00002   0.00002  -0.00141  -0.00138   3.14062
   D50        0.00028  -0.00001   0.00001  -0.00089  -0.00088  -0.00060
   D51        0.00016  -0.00001   0.00001  -0.00058  -0.00058  -0.00042
   D52       -3.14157   0.00000   0.00000  -0.00007  -0.00007   3.14155
   D53        0.00000   0.00000   0.00000   0.00005   0.00005   0.00004
   D54        3.14152   0.00001   0.00000   0.00031   0.00030  -3.14136
   D55       -3.14146  -0.00001   0.00001  -0.00048  -0.00047   3.14126
   D56        0.00007   0.00000   0.00000  -0.00022  -0.00021  -0.00015
   D57        0.00000   0.00000   0.00000   0.00005   0.00005   0.00005
   D58        3.14153   0.00001   0.00000   0.00026   0.00026  -3.14140
   D59       -3.14146  -0.00001   0.00001  -0.00047  -0.00046   3.14127
   D60        0.00007   0.00000   0.00000  -0.00026  -0.00026  -0.00018
   D61       -0.00008   0.00000   0.00000   0.00022   0.00022   0.00014
   D62        3.14158   0.00000   0.00000   0.00001   0.00001   3.14159
   D63        3.14159   0.00000   0.00000  -0.00004  -0.00004   3.14155
   D64        0.00005   0.00000   0.00000  -0.00025  -0.00024  -0.00019
         Item               Value     Threshold  Converged?
 Maximum Force            0.000918     0.000450     NO 
 RMS     Force            0.000131     0.000300     YES
 Maximum Displacement     0.006430     0.001800     NO 
 RMS     Displacement     0.001059     0.001200     YES
 Predicted change in Energy=-4.523819D-06
 Lowest energy point so far.  Saving SCF results.
 GradGradGradGradGradGradGradGradGradGradGradGradGradGradGradGradGradGrad

 Leave Link  103 at Wed Jan 08 21:19:23 2020, MaxMem=   134217728 cpu:         0.0
 (Enter E:\Gaussian\G09W\l202.exe)
                          Input orientation:                          
 ---------------------------------------------------------------------
 Center     Atomic      Atomic             Coordinates (Angstroms)
 Number     Number       Type             X           Y           Z
 ---------------------------------------------------------------------
      1          6           0       -2.796051    0.769773   -0.000179
      2          6           0       -1.760885    1.697980    0.000177
      3          6           0       -0.430850    1.270679    0.000486
      4          6           0       -0.142854   -0.107077   -0.000127
      5          6           0       -1.189711   -1.032471   -0.000238
      6          6           0       -2.510076   -0.597491   -0.000307
      7          1           0       -3.825648    1.108753   -0.000206
      8          1           0       -1.968800    2.760517    0.000591
      9          1           0       -0.954296   -2.089250   -0.000637
     10          1           0       -3.317376   -1.320800   -0.000607
     11          6           0        1.257582   -0.601713   -0.001347
     12          8           0        1.514824   -1.797387    0.002444
     13          6           0        0.654864    2.286124    0.002198
     14          6           0        2.345459    0.417487   -0.000032
     15          6           0        2.057142    1.792349    0.000595
     16          6           0        3.670925   -0.020453   -0.000129
     17          6           0        3.106576    2.714749    0.000383
     18          6           0        4.693768    0.916978   -0.000107
     19          1           0        3.877776   -1.082098   -0.000566
     20          6           0        4.427457    2.286787    0.000062
     21          1           0        2.877639    3.772844    0.000825
     22          1           0        5.237509    3.004775    0.000080
     23         35           0        6.509292    0.319436   -0.000620
     24          8           0        0.407238    3.484783   -0.002221
 ---------------------------------------------------------------------
                    Distance matrix (angstroms):
                    1          2          3          4          5
     1  C    0.000000
     2  C    1.390373   0.000000
     3  C    2.417661   1.396990   0.000000
     4  C    2.794338   2.424099   1.407535   0.000000
     5  C    2.414210   2.789552   2.424947   1.397234   0.000000
     6  C    1.396851   2.414637   2.795218   2.417488   1.390169
     7  H    1.083964   2.147192   3.398658   3.878301   3.396027
     8  H    2.155785   1.082688   2.141240   3.399585   3.872174
     9  H    3.400893   3.872169   3.400458   2.141832   1.082683
    10  H    2.154593   3.396424   3.879149   3.398634   2.147112
    11  C    4.279359   3.794698   2.521240   1.485222   2.484914
    12  O    5.017366   4.790393   3.632998   2.367498   2.810625
    13  C    3.769369   2.486315   1.486575   2.522652   3.796779
    14  C    5.153565   4.301363   2.904449   2.543003   3.820969
    15  C    4.959753   3.819194   2.542094   2.906511   4.303681
    16  C    6.515077   5.697155   4.300183   3.814762   4.964873
    17  C    6.214816   4.972524   3.820827   4.303661   5.700854
    18  C    7.491266   6.501732   5.136809   4.943845   6.198039
    19  H    6.925994   6.286758   4.909156   4.137164   5.067730
    20  C    7.381084   6.216291   4.963428   5.159295   6.524573
    21  H    6.419439   5.081434   4.148124   4.917028   6.295585
    22  H    8.338664   7.119356   5.927679   6.215459   7.590027
    23  Br   9.316234   8.384284   7.005029   6.665805   7.816796
    24  O    4.199089   2.809525   2.367416   3.633740   4.791225
                    6          7          8          9         10
     6  C    0.000000
     7  H    2.154529   0.000000
     8  H    3.401352   2.485198   0.000000
     9  H    2.155411   4.297893   4.954741   0.000000
    10  H    1.083932   2.482149   4.298349   2.484887   0.000000
    11  C    3.767661   5.363294   4.659842   2.665553   4.631126
    12  O    4.199950   6.079991   5.736735   2.486312   4.855646
    13  C    4.281598   4.632623   2.666207   4.661899   5.365500
    14  C    4.960484   6.209703   4.909442   4.143925   5.923626
    15  C    5.154689   5.922375   4.140720   4.912797   6.211050
    16  C    6.207878   7.581142   6.288107   5.066812   7.108252
    17  C    6.520561   7.115824   5.075582   6.290396   7.586357
    18  C    7.361317   8.521575   6.912919   6.398284   8.317817
    19  H    6.406208   8.008906   6.996295   4.935917   7.199110
    20  C    7.513217   8.336757   6.413776   6.936351   8.543835
    21  H    6.937385   7.213283   4.951038   7.003419   8.020188
    22  H    8.544085   9.259358   7.210447   8.017951   9.586274
    23  Br   9.065857  10.365038   8.822523   7.842634   9.962619
    24  O    5.017538   4.854158   2.483974   5.737911   6.079998
                   11         12         13         14         15
    11  C    0.000000
    12  O    1.223039   0.000000
    13  C    2.950065   4.173079   0.000000
    14  C    1.490720   2.365508   2.519905   0.000000
    15  C    2.524051   3.630471   1.486675   1.404768   0.000000
    16  C    2.482355   2.793970   3.796963   1.395941   2.427045
    17  C    3.797064   4.784668   2.488898   2.420064   1.397187
    18  C    3.756834   4.180128   4.264659   2.400843   2.778142
    19  H    2.663867   2.468844   4.661769   2.144004   3.402522
    20  C    4.288536   5.016364   3.772594   2.798035   2.421334
    21  H    4.664905   5.734522   2.674148   3.397298   2.143729
    22  H    5.370901   6.076113   4.638653   3.880466   3.403632
    23  Br   5.331883   5.424542   6.175937   4.164988   4.689468
    24  O    4.174031   5.397044   1.223978   3.628362   2.363583
                   16         17         18         19         20
    16  C    0.000000
    17  C    2.792816   0.000000
    18  C    1.387439   2.398157   0.000000
    19  H    1.081608   3.874377   2.159201   0.000000
    20  C    2.428106   1.388481   1.395456   3.413434   0.000000
    21  H    3.875359   1.082579   3.384419   4.956887   2.147161
    22  H    3.406787   2.150579   2.157441   4.307134   1.082447
    23  Br   2.858645   4.161250   1.911330   2.981471   2.864351
    24  O    4.789399   2.807024   4.996796   5.735943   4.194921
                   21         22         23         24
    21  H    0.000000
    22  H    2.481716   0.000000
    23  Br   5.011480   2.971276   0.000000
    24  O    2.487142   4.854063   6.874190   0.000000
 Stoichiometry    C14H7BrO2
 Framework group  C1[X(C14H7BrO2)]
 Deg. of freedom    66
 Full point group                 C1      NOp   1
 RotChk:  IX=0 Diff= 9.26D-06
 Largest Abelian subgroup         C1      NOp   1
 Largest concise Abelian subgroup C1      NOp   1
                         Standard orientation:                         
 ---------------------------------------------------------------------
 Center     Atomic      Atomic             Coordinates (Angstroms)
 Number     Number       Type             X           Y           Z
 ---------------------------------------------------------------------
      1          6           0       -5.087797    0.054732   -0.000095
      2          6           0       -4.052553    0.982852    0.000260
      3          6           0       -2.722554    0.555439    0.000569
      4          6           0       -2.434673   -0.822341   -0.000043
      5          6           0       -3.481608   -1.747646   -0.000155
      6          6           0       -4.801937   -1.312556   -0.000224
      7          1           0       -6.117366    0.393798   -0.000123
      8          1           0       -4.260379    2.045406    0.000674
      9          1           0       -3.246282   -2.804445   -0.000554
     10          1           0       -5.609297   -2.035797   -0.000524
     11          6           0       -1.034279   -1.317093   -0.001264
     12          8           0       -0.777137   -2.512789    0.002527
     13          6           0       -1.636755    1.570794    0.002281
     14          6           0        0.053683   -0.297985    0.000051
     15          6           0       -0.234518    1.076902    0.000678
     16          6           0        1.379112   -0.736036   -0.000046
     17          6           0        0.814993    1.999213    0.000466
     18          6           0        2.402034    0.201310   -0.000024
     19          1           0        1.585875   -1.797698   -0.000482
     20          6           0        2.135838    1.571141    0.000145
     21          1           0        0.586145    3.057327    0.000908
     22          1           0        2.945950    2.289061    0.000164
     23         35           0        4.217508   -0.396385   -0.000537
     24          8           0       -1.884281    2.769474   -0.002138
 ---------------------------------------------------------------------
 Rotational constants (GHZ):      1.0090941      0.1766071      0.1503019
 Leave Link  202 at Wed Jan 08 21:19:23 2020, MaxMem=   134217728 cpu:         0.0
 (Enter E:\Gaussian\G09W\l301.exe)
 Standard basis: 6-311+G(d) (5D, 7F)
 Ernie: Thresh=  0.10000D-02 Tol=  0.10000D-05 Strict=F.
 There are   440 symmetry adapted cartesian basis functions of A   symmetry.
 There are   421 symmetry adapted basis functions of A   symmetry.
   421 basis functions,   705 primitive gaussians,   440 cartesian basis functions
    71 alpha electrons       71 beta electrons
       nuclear repulsion energy      1372.4733665198 Hartrees.
 IExCor=  402 DFT=T Ex+Corr=B3LYP ExCW=0 ScaHFX=  0.200000
 ScaDFX=  0.800000  0.720000  1.000000  0.810000 ScalE2=  1.000000  1.000000
 IRadAn=      0 IRanWt=     -1 IRanGd=            0 ICorTp=0 IEmpDi=141
 NAtoms=   24 NActive=   24 NUniq=   24 SFac= 1.00D+00 NAtFMM=   60 NAOKFM=F Big=F
 Integral buffers will be    262144 words long.
 Raffenetti 2 integral format.
 Two-electron integral symmetry is turned on.
 R6Disp:  Grimme-D3(BJ) Dispersion energy=       -0.0618862121 Hartrees.
 Nuclear repulsion after empirical dispersion term =     1372.4114803077 Hartrees.
 ------------------------------------------------------------------------------
 Polarizable Continuum Model (PCM)
 =================================
 Model                : PCM (using non-symmetric T matrix).
 Atomic radii         : UFF (Universal Force Field).
 Polarization charges : Total charges.
 Charge compensation  : None.
 Solution method      : On-the-fly selection.
 Cavity type          : Scaled VdW (van der Waals Surface) (Alpha=1.100).
 Cavity algorithm     : GePol (No added spheres)
                        Default sphere list used, NSphG=   24.
                        Lebedev-Laikov grids with approx.  5.0 points / Ang**2.
                        Smoothing algorithm: Karplus/York (Gamma=1.0000).
                        Polarization charges: spherical gaussians, with
                                              point-specific exponents (IZeta= 3).
                        Self-potential: point-specific (ISelfS= 7).
                        Self-field    : sphere-specific E.n sum rule (ISelfD= 2).
 1st derivatives      : Analytical E(r).r(x)/FMM algorithm (CHGder, D1EAlg=3).
                        Cavity 1st derivative terms included.
 Solvent              : Acetonitrile, Eps=  35.688000 Eps(inf)=   1.806874
 ------------------------------------------------------------------------------
 GePol: Number of generator spheres                  =      24
 GePol: Total number of spheres                      =      24
 GePol: Number of exposed spheres                    =      24 (100.00%)
 GePol: Number of points                             =    2172
 GePol: Average weight of points                     =       0.13
 GePol: Minimum weight of points                     =   0.91D-10
 GePol: Maximum weight of points                     =    0.20577
 GePol: Number of points with low weight             =     141
 GePol: Fraction of low-weight points (<1% of avg)   =       6.49%
 GePol: Cavity surface area                          =    279.571 Ang**2
 GePol: Cavity volume                                =    305.331 Ang**3
 Leave Link  301 at Wed Jan 08 21:19:23 2020, MaxMem=   134217728 cpu:         0.0
 (Enter E:\Gaussian\G09W\l302.exe)
 NPDir=0 NMtPBC=     1 NCelOv=     1 NCel=       1 NClECP=     1 NCelD=      1
         NCelK=      1 NCelE2=     1 NClLst=     1 CellRange=     0.0.
 One-electron integrals computed using PRISM.
 NBasis=   421 RedAO= T EigKep=  1.62D-06  NBF=   421
 NBsUse=   415 1.00D-06 EigRej=  6.69D-07 NBFU=   415
 Precomputing XC quadrature grid using
 IXCGrd= 4 IRadAn=           0 IRanWt=          -1 IRanGd=           0 AccXCQ= 0.00D+00.
 Generated NRdTot=       0 NPtTot=           0 NUsed=           0 NTot=          16
 NSgBfM=   431   431   431   431   431 MxSgAt=    24 MxSgA2=    24.
 Leave Link  302 at Wed Jan 08 21:19:25 2020, MaxMem=   134217728 cpu:         1.0
 (Enter E:\Gaussian\G09W\l303.exe)
 DipDrv:  MaxL=1.
 Leave Link  303 at Wed Jan 08 21:19:26 2020, MaxMem=   134217728 cpu:         0.0
 (Enter E:\Gaussian\G09W\l401.exe)
 Initial guess from the checkpoint file:  "E:\Gaussian file\2-BrAQ ground state opt.chk"
 B after Tr=     0.000000    0.000000    0.000000
         Rot=    1.000000    0.000116   -0.000040   -0.000005 Ang=   0.01 deg.
 Guess basis will be translated and rotated to current coordinates.
 JPrj=2 DoOrth=T DoCkMO=T.
 Leave Link  401 at Wed Jan 08 21:19:28 2020, MaxMem=   134217728 cpu:         2.0
 (Enter E:\Gaussian\G09W\l502.exe)
 Closed shell SCF:
 Using DIIS extrapolation, IDIIS=  1040.
 Integral symmetry usage will be decided dynamically.
 IVT=      604602 IEndB=      604602 NGot=   134217728 MDV=   133823807
 LenX=   133823807 LenY=   133629766
 Requested convergence on RMS density matrix=1.00D-08 within 128 cycles.
 Requested convergence on MAX density matrix=1.00D-06.
 Requested convergence on             energy=1.00D-06.
 No special actions if energy rises.
 Fock matrices will be formed incrementally for  20 cycles.

 Cycle   1  Pass 1  IDiag  1:
 FoFJK:  IHMeth= 1 ICntrl=       0 DoSepK=F KAlg= 0 I1Cent=   0 FoldK=F
 IRaf= 830000000 NMat=   1 IRICut=       1 DoRegI=T DoRafI=F ISym2E= 0.
 FoFCou: FMM=F IPFlag=           0 FMFlag=      100000 FMFlg1=           0
         NFxFlg=           0 DoJE=F BraDBF=F KetDBF=F FulRan=T
         wScrn=  0.000000 ICntrl=       0 IOpCl=  0 I1Cent=           0 NGrid=           0
         NMat0=    1 NMatS0=      1 NMatT0=    0 NMatD0=    1 NMtDS0=    0 NMtDT0=    0
 Symmetry not used in FoFCou.
 Inv3:  Mode=1 IEnd=    14152752.
 Iteration    1 A*A^-1 deviation from unit magnitude is 3.11D-15 for   1251.
 Iteration    1 A*A^-1 deviation from orthogonality  is 3.15D-15 for   1456   1251.
 Iteration    1 A^-1*A deviation from unit magnitude is 2.44D-15 for   1253.
 Iteration    1 A^-1*A deviation from orthogonality  is 1.32D-13 for   1547   1125.
 E= -3262.55357706832    
 DIIS: error= 3.22D-04 at cycle   1 NSaved=   1.
 NSaved= 1 IEnMin= 1 EnMin= -3262.55357706832     IErMin= 1 ErrMin= 3.22D-04
 ErrMax= 3.22D-04  0.00D+00 EMaxC= 1.00D-01 BMatC= 3.68D-05 BMatP= 3.68D-05
 IDIUse=3 WtCom= 9.97D-01 WtEn= 3.22D-03
 Coeff-Com:  0.100D+01
 Coeff-En:   0.100D+01
 Coeff:      0.100D+01
 Gap=     0.410 Goal=   None    Shift=    0.000
 RMSDP=2.60D-04 MaxDP=8.04D-03              OVMax= 1.74D-03

 Cycle   2  Pass 1  IDiag  1:
 RMSU=  2.60D-04    CP:  1.00D+00
 E= -3262.55361602885     Delta-E=       -0.000038960523 Rises=F Damp=F
 DIIS: error= 7.38D-05 at cycle   2 NSaved=   2.
 NSaved= 2 IEnMin= 2 EnMin= -3262.55361602885     IErMin= 2 ErrMin= 7.38D-05
 ErrMax= 7.38D-05  0.00D+00 EMaxC= 1.00D-01 BMatC= 1.44D-06 BMatP= 3.68D-05
 IDIUse=1 WtCom= 1.00D+00 WtEn= 0.00D+00
 Coeff-Com:  0.976D-02 0.990D+00
 Coeff:      0.976D-02 0.990D+00
 Gap=     0.145 Goal=   None    Shift=    0.000
 RMSDP=1.87D-05 MaxDP=5.00D-04 DE=-3.90D-05 OVMax= 7.65D-04

 Cycle   3  Pass 1  IDiag  1:
 RMSU=  1.76D-05    CP:  1.00D+00  1.02D+00
 E= -3262.55361398893     Delta-E=        0.000002039916 Rises=F Damp=F
 DIIS: error= 1.51D-04 at cycle   3 NSaved=   3.
 NSaved= 3 IEnMin= 2 EnMin= -3262.55361602885     IErMin= 2 ErrMin= 7.38D-05
 ErrMax= 1.51D-04  0.00D+00 EMaxC= 1.00D-01 BMatC= 4.35D-06 BMatP= 1.44D-06
 IDIUse=3 WtCom= 4.48D-01 WtEn= 5.52D-01
 Coeff-Com: -0.254D-01 0.663D+00 0.362D+00
 Coeff-En:   0.000D+00 0.719D+00 0.281D+00
 Coeff:     -0.114D-01 0.694D+00 0.317D+00
 Gap=     0.145 Goal=   None    Shift=    0.000
 RMSDP=1.54D-05 MaxDP=6.06D-04 DE= 2.04D-06 OVMax= 5.73D-04

 Cycle   4  Pass 1  IDiag  1:
 RMSU=  7.15D-06    CP:  1.00D+00  1.03D+00  3.41D-01
 E= -3262.55361719457     Delta-E=       -0.000003205643 Rises=F Damp=F
 DIIS: error= 1.26D-05 at cycle   4 NSaved=   4.
 NSaved= 4 IEnMin= 4 EnMin= -3262.55361719457     IErMin= 4 ErrMin= 1.26D-05
 ErrMax= 1.26D-05  0.00D+00 EMaxC= 1.00D-01 BMatC= 2.40D-08 BMatP= 1.44D-06
 IDIUse=1 WtCom= 1.00D+00 WtEn= 0.00D+00
 Coeff-Com: -0.852D-02 0.151D+00 0.903D-01 0.767D+00
 Coeff:     -0.852D-02 0.151D+00 0.903D-01 0.767D+00
 Gap=     0.145 Goal=   None    Shift=    0.000
 RMSDP=3.00D-06 MaxDP=1.85D-04 DE=-3.21D-06 OVMax= 4.28D-05

 Cycle   5  Pass 1  IDiag  1:
 RMSU=  1.52D-06    CP:  1.00D+00  1.03D+00  3.66D-01  7.59D-01
 E= -3262.55361721515     Delta-E=       -0.000000020571 Rises=F Damp=F
 DIIS: error= 3.01D-06 at cycle   5 NSaved=   5.
 NSaved= 5 IEnMin= 5 EnMin= -3262.55361721515     IErMin= 5 ErrMin= 3.01D-06
 ErrMax= 3.01D-06  0.00D+00 EMaxC= 1.00D-01 BMatC= 2.98D-09 BMatP= 2.40D-08
 IDIUse=1 WtCom= 1.00D+00 WtEn= 0.00D+00
 Coeff-Com: -0.178D-02 0.195D-01 0.140D-01 0.276D+00 0.692D+00
 Coeff:     -0.178D-02 0.195D-01 0.140D-01 0.276D+00 0.692D+00
 Gap=     0.145 Goal=   None    Shift=    0.000
 RMSDP=7.26D-07 MaxDP=4.24D-05 DE=-2.06D-08 OVMax= 2.14D-05

 Cycle   6  Pass 1  IDiag  1:
 RMSU=  4.20D-07    CP:  1.00D+00  1.03D+00  3.65D-01  8.06D-01  8.41D-01
 E= -3262.55361721752     Delta-E=       -0.000000002377 Rises=F Damp=F
 DIIS: error= 2.16D-06 at cycle   6 NSaved=   6.
 NSaved= 6 IEnMin= 6 EnMin= -3262.55361721752     IErMin= 6 ErrMin= 2.16D-06
 ErrMax= 2.16D-06  0.00D+00 EMaxC= 1.00D-01 BMatC= 1.00D-09 BMatP= 2.98D-09
 IDIUse=1 WtCom= 1.00D+00 WtEn= 0.00D+00
 Coeff-Com:  0.132D-03-0.121D-01-0.483D-02 0.597D-01 0.412D+00 0.545D+00
 Coeff:      0.132D-03-0.121D-01-0.483D-02 0.597D-01 0.412D+00 0.545D+00
 Gap=     0.145 Goal=   None    Shift=    0.000
 RMSDP=2.96D-07 MaxDP=1.52D-05 DE=-2.38D-09 OVMax= 9.77D-06

 Cycle   7  Pass 1  IDiag  1:
 RMSU=  1.52D-07    CP:  1.00D+00  1.03D+00  3.65D-01  8.18D-01  8.48D-01
                    CP:  4.49D-01
 E= -3262.55361721845     Delta-E=       -0.000000000924 Rises=F Damp=F
 DIIS: error= 3.78D-07 at cycle   7 NSaved=   7.
 NSaved= 7 IEnMin= 7 EnMin= -3262.55361721845     IErMin= 7 ErrMin= 3.78D-07
 ErrMax= 3.78D-07  0.00D+00 EMaxC= 1.00D-01 BMatC= 6.06D-11 BMatP= 1.00D-09
 IDIUse=1 WtCom= 1.00D+00 WtEn= 0.00D+00
 Coeff-Com:  0.211D-03-0.852D-02-0.398D-02 0.107D-01 0.170D+00 0.284D+00
 Coeff-Com:  0.548D+00
 Coeff:      0.211D-03-0.852D-02-0.398D-02 0.107D-01 0.170D+00 0.284D+00
 Coeff:      0.548D+00
 Gap=     0.145 Goal=   None    Shift=    0.000
 RMSDP=6.48D-08 MaxDP=2.87D-06 DE=-9.24D-10 OVMax= 2.51D-06

 Cycle   8  Pass 1  IDiag  1:
 RMSU=  5.37D-08    CP:  1.00D+00  1.03D+00  3.65D-01  8.19D-01  8.57D-01
                    CP:  4.60D-01  8.36D-01
 E= -3262.55361721870     Delta-E=       -0.000000000257 Rises=F Damp=F
 DIIS: error= 1.59D-07 at cycle   8 NSaved=   8.
 NSaved= 8 IEnMin= 8 EnMin= -3262.55361721870     IErMin= 8 ErrMin= 1.59D-07
 ErrMax= 1.59D-07  0.00D+00 EMaxC= 1.00D-01 BMatC= 6.45D-12 BMatP= 6.06D-11
 IDIUse=1 WtCom= 1.00D+00 WtEn= 0.00D+00
 Coeff-Com:  0.926D-04-0.309D-02-0.165D-02-0.539D-03 0.436D-01 0.869D-01
 Coeff-Com:  0.279D+00 0.596D+00
 Coeff:      0.926D-04-0.309D-02-0.165D-02-0.539D-03 0.436D-01 0.869D-01
 Coeff:      0.279D+00 0.596D+00
 Gap=     0.145 Goal=   None    Shift=    0.000
 RMSDP=2.12D-08 MaxDP=9.24D-07 DE=-2.57D-10 OVMax= 8.90D-07

 Cycle   9  Pass 1  IDiag  1:
 RMSU=  1.64D-08    CP:  1.00D+00  1.03D+00  3.65D-01  8.20D-01  8.60D-01
                    CP:  4.64D-01  8.72D-01  8.55D-01
 E= -3262.55361721842     Delta-E=        0.000000000286 Rises=F Damp=F
 DIIS: error= 6.47D-08 at cycle   9 NSaved=   9.
 NSaved= 9 IEnMin= 8 EnMin= -3262.55361721870     IErMin= 9 ErrMin= 6.47D-08
 ErrMax= 6.47D-08  0.00D+00 EMaxC= 1.00D-01 BMatC= 1.35D-12 BMatP= 6.45D-12
 IDIUse=1 WtCom= 1.00D+00 WtEn= 0.00D+00
 Coeff-Com:  0.134D-04-0.102D-03-0.204D-03-0.213D-02-0.768D-02-0.352D-02
 Coeff-Com:  0.575D-01 0.349D+00 0.607D+00
 Coeff:      0.134D-04-0.102D-03-0.204D-03-0.213D-02-0.768D-02-0.352D-02
 Coeff:      0.575D-01 0.349D+00 0.607D+00
 Gap=     0.145 Goal=   None    Shift=    0.000
 RMSDP=9.98D-09 MaxDP=5.50D-07 DE= 2.86D-10 OVMax= 2.60D-07

 Error on total polarization charges =  0.01852
 SCF Done:  E(RB3LYP) =  -3262.55361722     A.U. after    9 cycles
            NFock=  9  Conv=0.10D-07     -V/T= 2.0018
 KE= 3.256668004815D+03 PE=-1.050049928794D+04 EE= 2.608866185595D+03
 Leave Link  502 at Wed Jan 08 21:38:30 2020, MaxMem=   134217728 cpu:      1142.0
 (Enter E:\Gaussian\G09W\l701.exe)
 Compute integral first derivatives.
 ... and contract with generalized density number  0.
 R6Disp: Adding Grimme-D3(BJ) dispersion energy 1st derivatives to the gradient.
 D1PCM: PCM CHGder 1st derivatives, ID1Alg=3 FixD1E=F DoIter=F DoCFld=F I1PDM=0.
 GePol: Maximum number of non-zero 1st derivatives   =     349
 Leave Link  701 at Wed Jan 08 21:39:07 2020, MaxMem=   134217728 cpu:        36.0
 (Enter E:\Gaussian\G09W\l702.exe)
 L702 exits ... SP integral derivatives will be done elsewhere.
 Leave Link  702 at Wed Jan 08 21:39:07 2020, MaxMem=   134217728 cpu:         0.0
 (Enter E:\Gaussian\G09W\l703.exe)
 Compute integral first derivatives, UseDBF=F ICtDFT=           0.
 Integral derivatives from FoFJK, PRISM(SPDF).
 Calling FoFJK, ICntrl=      2127 FMM=F ISym2X=0 I1Cent= 0 IOpClX= 0 NMat=1 NMatS=1 NMatT=0.
 FoFJK:  IHMeth= 1 ICntrl=    2127 DoSepK=F KAlg= 0 I1Cent=   0 FoldK=F
 IRaf=         0 NMat=   1 IRICut=       1 DoRegI=T DoRafI=F ISym2E= 0.
 FoFCou: FMM=F IPFlag=           0 FMFlag=      100000 FMFlg1=         800
         NFxFlg=           0 DoJE=F BraDBF=F KetDBF=F FulRan=T
         wScrn=  0.000000 ICntrl=    2127 IOpCl=  0 I1Cent=           0 NGrid=           0
         NMat0=    1 NMatS0=      1 NMatT0=    0 NMatD0=    1 NMtDS0=    0 NMtDT0=    0
 Symmetry not used in FoFCou.
 Leave Link  703 at Wed Jan 08 21:47:09 2020, MaxMem=   134217728 cpu:       482.0
 (Enter E:\Gaussian\G09W\l716.exe)
 Dipole        =-8.84989788D-01 1.94320750D-01 2.56655421D-04
 ***** Axes restored to original set *****
 -------------------------------------------------------------------
 Center     Atomic                   Forces (Hartrees/Bohr)
 Number     Number              X              Y              Z
 -------------------------------------------------------------------
      1        6          -0.000000504   -0.000033029   -0.000016183
      2        6          -0.000049289   -0.000033602    0.000057674
      3        6          -0.000126959    0.000153656    0.000214511
      4        6          -0.000044653   -0.000195424   -0.000167593
      5        6          -0.000050522   -0.000003660   -0.000059623
      6        6          -0.000006714    0.000007798    0.000014360
      7        1          -0.000029842    0.000008830   -0.000010237
      8        1           0.000003885    0.000036561    0.000007658
      9        1           0.000036187   -0.000042882   -0.000007771
     10        1          -0.000011901   -0.000043625    0.000010606
     11        6          -0.000021750    0.000113878    0.000785455
     12        8           0.000038023   -0.000126149   -0.000285508
     13        6           0.000031522   -0.000122185   -0.000929675
     14        6           0.000119012   -0.000154461   -0.000172426
     15        6           0.000036470    0.000190558    0.000220073
     16        6          -0.000025172    0.000053900   -0.000052546
     17        6           0.000060108    0.000006480    0.000055192
     18        6           0.000040893    0.000018147    0.000010035
     19        1          -0.000005174   -0.000030114   -0.000007302
     20        6          -0.000045303    0.000010996   -0.000012807
     21        1          -0.000042380    0.000039982    0.000005217
     22        1           0.000005975    0.000042433   -0.000007804
     23       35           0.000119737   -0.000028425    0.000007180
     24        8          -0.000031648    0.000130338    0.000341512
 -------------------------------------------------------------------
 Cartesian Forces:  Max     0.000929675 RMS     0.000171327
 Leave Link  716 at Wed Jan 08 21:47:10 2020, MaxMem=   134217728 cpu:         0.0
 (Enter E:\Gaussian\G09W\l103.exe)

 GradGradGradGradGradGradGradGradGradGradGradGradGradGradGradGradGradGrad
 Berny optimization.
 Using GEDIIS/GDIIS optimizer.
 FormGI is forming the generalized inverse of G from B-inverse, IUseBI=4.
 Internal  Forces:  Max     0.000181114 RMS     0.000066293
 Search for a local minimum.
 Step number   3 out of a maximum of  142
 All quantities printed in internal units (Hartrees-Bohrs-Radians)
 RMS Force = .66293D-04 SwitMx=.10000D-02 MixMth= 2
 Mixed Optimization -- En-DIIS/RFO-DIIS
 Swapping is turned off.
 Update second derivatives using D2CorX and points    1    2    3
 DE=  1.02D-06 DEPred=-4.52D-06 R=-2.25D-01
 Trust test=-2.25D-01 RLast= 2.07D-02 DXMaxT set to 1.50D-01
 ITU= -1  1  0
     Eigenvalues ---    0.00892   0.00893   0.01216   0.01537   0.01669
     Eigenvalues ---    0.01728   0.01763   0.01805   0.02147   0.02148
     Eigenvalues ---    0.02161   0.02164   0.02168   0.02170   0.02176
     Eigenvalues ---    0.02186   0.02191   0.02193   0.02198   0.02216
     Eigenvalues ---    0.03303   0.12320   0.16000   0.16000   0.16000
     Eigenvalues ---    0.16000   0.16004   0.16009   0.18330   0.20936
     Eigenvalues ---    0.22000   0.22460   0.22620   0.23883   0.24497
     Eigenvalues ---    0.24696   0.25000   0.25000   0.25000   0.25004
     Eigenvalues ---    0.25012   0.29474   0.31979   0.32665   0.33427
     Eigenvalues ---    0.35477   0.35504   0.35608   0.35611   0.35628
     Eigenvalues ---    0.35668   0.35742   0.39151   0.41722   0.42266
     Eigenvalues ---    0.42531   0.44813   0.45499   0.46072   0.46691
     Eigenvalues ---    0.46716   0.46919   0.47170   0.50516   0.78514
     Eigenvalues ---    0.94568
 En-DIIS/RFO-DIIS IScMMF=        0 using points:     3    2    1
 RFO step:  Lambda=-2.05342772D-06.
 NNeg= 0 NP= 3 Switch=  2.50D-03 Rises=F DC=  2.72D-05 SmlDif=  1.00D-05
 RMS Error=  0.2719515729D-03 NUsed= 3 EDIIS=F
 DidBck=T Rises=F RFO-DIIS coefs:    0.43932    0.66354   -0.10286
 Iteration  1 RMS(Cart)=  0.00084597 RMS(Int)=  0.00000213
 Iteration  2 RMS(Cart)=  0.00000217 RMS(Int)=  0.00000025
 Iteration  3 RMS(Cart)=  0.00000000 RMS(Int)=  0.00000025
 ITry= 1 IFail=0 DXMaxC= 5.29D-03 DCOld= 1.00D+10 DXMaxT= 1.50D-01 DXLimC= 3.00D+00 Rises=F
 Variable       Old X    -DE/DX   Delta X   Delta X   Delta X     New X
                                 (Linear)    (Quad)   (Total)
    R1        2.62742   0.00004  -0.00011   0.00018   0.00007   2.62749
    R2        2.63967   0.00004  -0.00003   0.00006   0.00003   2.63970
    R3        2.04839   0.00003  -0.00002   0.00005   0.00003   2.04842
    R4        2.63993   0.00005  -0.00012   0.00018   0.00006   2.63999
    R5        2.04598   0.00004   0.00003  -0.00002   0.00001   2.04599
    R6        2.65985   0.00018  -0.00022   0.00044   0.00022   2.66007
    R7        2.80922   0.00013   0.00021  -0.00028  -0.00007   2.80915
    R8        2.64039   0.00005  -0.00013   0.00020   0.00007   2.64046
    R9        2.80666   0.00013   0.00023  -0.00031  -0.00008   2.80658
   R10        2.62704   0.00004  -0.00010   0.00017   0.00007   2.62710
   R11        2.04597   0.00004   0.00003  -0.00002   0.00001   2.04599
   R12        2.04833   0.00003  -0.00002   0.00005   0.00003   2.04836
   R13        2.31121   0.00013  -0.00052   0.00084   0.00033   2.31154
   R14        2.81705   0.00013   0.00024  -0.00032  -0.00008   2.81697
   R15        2.80941   0.00012   0.00035  -0.00050  -0.00015   2.80925
   R16        2.31298   0.00013  -0.00056   0.00091   0.00035   2.31333
   R17        2.65463   0.00016  -0.00023   0.00044   0.00021   2.65484
   R18        2.63795   0.00004  -0.00016   0.00023   0.00007   2.63801
   R19        2.64030   0.00005  -0.00013   0.00020   0.00007   2.64037
   R20        2.62188   0.00009  -0.00031   0.00049   0.00018   2.62206
   R21        2.04394   0.00004   0.00006  -0.00007  -0.00001   2.04394
   R22        2.62385   0.00004  -0.00012   0.00018   0.00006   2.62391
   R23        2.04578   0.00004   0.00002  -0.00001   0.00001   2.04579
   R24        2.63703   0.00008  -0.00021   0.00033   0.00013   2.63716
   R25        3.61189   0.00013  -0.00083   0.00128   0.00045   3.61234
   R26        2.04553   0.00003   0.00001   0.00000   0.00001   2.04554
    A1        2.09558   0.00001   0.00001  -0.00001   0.00000   2.09559
    A2        2.09256  -0.00002  -0.00003   0.00001  -0.00002   2.09254
    A3        2.09504   0.00001   0.00001   0.00000   0.00001   2.09505
    A4        2.09976   0.00001  -0.00009   0.00013   0.00004   2.09980
    A5        2.10854   0.00002   0.00029  -0.00042  -0.00013   2.10841
    A6        2.07489  -0.00002  -0.00019   0.00028   0.00009   2.07497
    A7        2.08772  -0.00002   0.00008  -0.00012  -0.00005   2.08767
    A8        2.07877   0.00006  -0.00028   0.00048   0.00020   2.07897
    A9        2.11670  -0.00004   0.00020  -0.00035  -0.00015   2.11655
   A10        2.08862  -0.00002   0.00006  -0.00010  -0.00004   2.08858
   A11        2.11639  -0.00004   0.00022  -0.00038  -0.00016   2.11623
   A12        2.07818   0.00006  -0.00028   0.00048   0.00020   2.07838
   A13        2.09946   0.00001  -0.00009   0.00013   0.00004   2.09950
   A14        2.07550  -0.00002  -0.00018   0.00026   0.00008   2.07558
   A15        2.10823   0.00002   0.00027  -0.00040  -0.00012   2.10811
   A16        2.09522   0.00001   0.00003  -0.00004  -0.00001   2.09522
   A17        2.09519   0.00001   0.00001   0.00001   0.00001   2.09520
   A18        2.09277  -0.00002  -0.00004   0.00003  -0.00001   2.09276
   A19        2.12223  -0.00003   0.00016  -0.00029  -0.00012   2.12211
   A20        2.04925   0.00007  -0.00042   0.00072   0.00030   2.04955
   A21        2.11169  -0.00004   0.00026  -0.00043  -0.00017   2.11153
   A22        2.05106   0.00007  -0.00039   0.00069   0.00030   2.05135
   A23        2.11904  -0.00003   0.00024  -0.00039  -0.00016   2.11888
   A24        2.11307  -0.00004   0.00016  -0.00028  -0.00012   2.11295
   A25        2.11690  -0.00003   0.00024  -0.00041  -0.00016   2.11674
   A26        2.06966   0.00005  -0.00030   0.00051   0.00021   2.06987
   A27        2.09662  -0.00002   0.00006  -0.00010  -0.00004   2.09657
   A28        2.11607  -0.00003   0.00015  -0.00027  -0.00012   2.11595
   A29        2.08196   0.00005  -0.00026   0.00044   0.00018   2.08215
   A30        2.08515  -0.00002   0.00011  -0.00017  -0.00006   2.08509
   A31        2.08063   0.00004  -0.00024   0.00039   0.00014   2.08077
   A32        2.08234  -0.00004  -0.00024   0.00034   0.00011   2.08244
   A33        2.12022   0.00000   0.00048  -0.00073  -0.00025   2.11997
   A34        2.10721   0.00001  -0.00012   0.00018   0.00006   2.10727
   A35        2.07878  -0.00003  -0.00005   0.00006   0.00000   2.07878
   A36        2.09720   0.00002   0.00017  -0.00024  -0.00007   2.09714
   A37        2.12063  -0.00005   0.00032  -0.00050  -0.00018   2.12045
   A38        2.08178   0.00002  -0.00017   0.00025   0.00008   2.08186
   A39        2.08078   0.00003  -0.00015   0.00025   0.00010   2.08087
   A40        2.07614   0.00003  -0.00013   0.00021   0.00008   2.07622
   A41        2.10305  -0.00003  -0.00008   0.00008   0.00001   2.10305
   A42        2.10400   0.00000   0.00020  -0.00029  -0.00009   2.10391
    D1       -0.00006   0.00001   0.00004   0.00003   0.00007   0.00000
    D2       -3.14126  -0.00002  -0.00028  -0.00008  -0.00036   3.14156
    D3        3.14137   0.00002   0.00017   0.00006   0.00024  -3.14158
    D4        0.00018  -0.00001  -0.00015  -0.00005  -0.00019  -0.00002
    D5       -0.00013   0.00001   0.00013   0.00002   0.00015   0.00001
    D6       -3.14157   0.00000  -0.00001  -0.00002  -0.00002  -3.14159
    D7       -3.14156   0.00000  -0.00001  -0.00002  -0.00002  -3.14159
    D8        0.00018  -0.00001  -0.00014  -0.00005  -0.00019  -0.00001
    D9        0.00046  -0.00003  -0.00037  -0.00012  -0.00050  -0.00004
   D10       -3.14056  -0.00006  -0.00087  -0.00025  -0.00112   3.14150
   D11       -3.14153  -0.00001  -0.00006  -0.00001  -0.00007   3.14159
   D12        0.00064  -0.00003  -0.00055  -0.00014  -0.00070  -0.00006
   D13       -0.00066   0.00005   0.00054   0.00017   0.00071   0.00006
   D14        3.14039   0.00007   0.00102   0.00028   0.00130  -3.14149
   D15        3.14035   0.00007   0.00105   0.00030   0.00135  -3.14148
   D16       -0.00178   0.00009   0.00152   0.00042   0.00194   0.00016
   D17       -3.14017  -0.00008  -0.00119  -0.00048  -0.00167   3.14135
   D18       -0.00532   0.00018   0.00436   0.00153   0.00589   0.00057
   D19        0.00201  -0.00010  -0.00169  -0.00061  -0.00230  -0.00030
   D20        3.13685   0.00016   0.00386   0.00140   0.00525  -3.14108
   D21        0.00047  -0.00003  -0.00038  -0.00012  -0.00050  -0.00004
   D22       -3.14151  -0.00001  -0.00007  -0.00002  -0.00009   3.14158
   D23       -3.14060  -0.00006  -0.00085  -0.00023  -0.00108   3.14151
   D24        0.00061  -0.00003  -0.00053  -0.00013  -0.00066  -0.00006
   D25        3.13744   0.00013   0.00342   0.00096   0.00438  -3.14137
   D26        0.00141  -0.00008  -0.00123  -0.00018  -0.00142  -0.00001
   D27       -0.00469   0.00015   0.00389   0.00107   0.00496   0.00027
   D28       -3.14072  -0.00006  -0.00076  -0.00007  -0.00083  -3.14155
   D29       -0.00007   0.00001   0.00005   0.00003   0.00007   0.00000
   D30        3.14137   0.00002   0.00018   0.00006   0.00024  -3.14158
   D31       -3.14127  -0.00002  -0.00027  -0.00008  -0.00035   3.14157
   D32        0.00017  -0.00001  -0.00014  -0.00004  -0.00018  -0.00002
   D33       -0.00140   0.00008   0.00122   0.00018   0.00140   0.00001
   D34        3.14077   0.00005   0.00072   0.00006   0.00078   3.14155
   D35       -3.13746  -0.00013  -0.00340  -0.00096  -0.00435   3.14137
   D36        0.00470  -0.00015  -0.00390  -0.00108  -0.00497  -0.00027
   D37       -0.00199   0.00010   0.00168   0.00061   0.00229   0.00030
   D38        3.14016   0.00008   0.00119   0.00048   0.00167  -3.14135
   D39       -3.13686  -0.00016  -0.00385  -0.00139  -0.00524   3.14108
   D40        0.00529  -0.00018  -0.00434  -0.00152  -0.00586  -0.00057
   D41        0.00175  -0.00009  -0.00150  -0.00041  -0.00191  -0.00016
   D42       -3.14041  -0.00007  -0.00101  -0.00028  -0.00129   3.14149
   D43       -3.14042  -0.00007  -0.00099  -0.00029  -0.00128   3.14148
   D44        0.00061  -0.00005  -0.00050  -0.00016  -0.00066  -0.00005
   D45        3.14061   0.00006   0.00084   0.00023   0.00106  -3.14151
   D46       -0.00062   0.00003   0.00054   0.00013   0.00067   0.00005
   D47       -0.00042   0.00003   0.00034   0.00011   0.00045   0.00003
   D48        3.14154   0.00001   0.00004   0.00002   0.00006  -3.14159
   D49        3.14062   0.00006   0.00082   0.00024   0.00106  -3.14150
   D50       -0.00060   0.00003   0.00052   0.00014   0.00066   0.00006
   D51       -0.00042   0.00003   0.00034   0.00011   0.00046   0.00004
   D52        3.14155   0.00001   0.00004   0.00001   0.00005  -3.14159
   D53        0.00004   0.00000  -0.00003  -0.00002  -0.00004   0.00000
   D54       -3.14136  -0.00002  -0.00018  -0.00007  -0.00024   3.14158
   D55        3.14126   0.00002   0.00028   0.00008   0.00036  -3.14156
   D56       -0.00015   0.00001   0.00013   0.00003   0.00016   0.00001
   D57        0.00005   0.00000  -0.00003  -0.00002  -0.00005   0.00000
   D58       -3.14140  -0.00001  -0.00015  -0.00005  -0.00021   3.14158
   D59        3.14127   0.00002   0.00027   0.00008   0.00036  -3.14156
   D60       -0.00018   0.00001   0.00015   0.00005   0.00020   0.00002
   D61        0.00014  -0.00001  -0.00013  -0.00003  -0.00016  -0.00002
   D62        3.14159   0.00000  -0.00001   0.00000   0.00000   3.14159
   D63        3.14155   0.00000   0.00002   0.00002   0.00004   3.14159
   D64       -0.00019   0.00001   0.00014   0.00005   0.00020   0.00001
         Item               Value     Threshold  Converged?
 Maximum Force            0.000181     0.000450     YES
 RMS     Force            0.000066     0.000300     YES
 Maximum Displacement     0.005291     0.001800     NO 
 RMS     Displacement     0.000846     0.001200     YES
 Predicted change in Energy=-4.809079D-06
 GradGradGradGradGradGradGradGradGradGradGradGradGradGradGradGradGradGrad

 Leave Link  103 at Wed Jan 08 21:47:10 2020, MaxMem=   134217728 cpu:         0.0
 (Enter E:\Gaussian\G09W\l202.exe)
                          Input orientation:                          
 ---------------------------------------------------------------------
 Center     Atomic      Atomic             Coordinates (Angstroms)
 Number     Number       Type             X           Y           Z
 ---------------------------------------------------------------------
      1          6           0       -2.796231    0.769754    0.000060
      2          6           0       -1.761035    1.697981    0.000026
      3          6           0       -0.430951    1.270721   -0.000084
      4          6           0       -0.142940   -0.107150   -0.000114
      5          6           0       -1.189867   -1.032523   -0.000100
      6          6           0       -2.510264   -0.597528   -0.000012
      7          1           0       -3.825835    1.108760    0.000134
      8          1           0       -1.969085    2.760498    0.000055
      9          1           0       -0.954581   -2.089337   -0.000132
     10          1           0       -3.317570   -1.320852    0.000012
     11          6           0        1.257531   -0.601560   -0.000099
     12          8           0        1.514838   -1.797403   -0.000357
     13          6           0        0.654898    2.285971   -0.000240
     14          6           0        2.345528    0.417448   -0.000062
     15          6           0        2.057168    1.792415   -0.000034
     16          6           0        3.671054   -0.020425    0.000003
     17          6           0        3.106674    2.714790    0.000121
     18          6           0        4.694046    0.916987    0.000134
     19          1           0        3.878079   -1.082033   -0.000026
     20          6           0        4.427592    2.286837    0.000205
     21          1           0        2.877791    3.772904    0.000145
     22          1           0        5.237644    3.004835    0.000315
     23         35           0        6.509792    0.319367    0.000247
     24          8           0        0.407225    3.484818    0.000321
 ---------------------------------------------------------------------
                    Distance matrix (angstroms):
                    1          2          3          4          5
     1  C    0.000000
     2  C    1.390409   0.000000
     3  C    2.417751   1.397024   0.000000
     4  C    2.794443   2.424197   1.407651   0.000000
     5  C    2.414250   2.789603   2.425054   1.397272   0.000000
     6  C    1.396867   2.414686   2.795335   2.417580   1.390204
     7  H    1.083978   2.147226   3.398745   3.878421   3.396088
     8  H    2.155744   1.082694   2.141329   3.399737   3.872233
     9  H    3.400893   3.872227   3.400614   2.141920   1.082689
    10  H    2.154629   3.396491   3.879281   3.398727   2.147150
    11  C    4.279426   3.794684   2.521192   1.485180   2.485052
    12  O    5.017530   4.790517   3.633109   2.367527   2.810778
    13  C    3.769510   2.486456   1.486539   2.522613   3.796783
    14  C    5.153815   4.301584   2.904636   2.543163   3.821182
    15  C    4.959972   3.819371   2.542223   2.906686   4.303895
    16  C    6.515378   5.697413   4.300407   3.814980   4.965168
    17  C    6.215099   4.972776   3.821011   4.303875   5.701107
    18  C    7.491724   6.502155   5.137189   4.944218   6.198469
    19  H    6.926437   6.287137   4.909500   4.137510   5.068188
    20  C    7.381407   6.216580   4.963661   5.159549   6.524875
    21  H    6.419769   5.081733   4.148336   4.917280   6.295869
    22  H    8.338990   7.119648   5.927910   6.215718   7.590334
    23  Br   9.316916   8.384937   7.005640   6.666391   7.817440
    24  O    4.199251   2.809651   2.367438   3.633858   4.791354
                    6          7          8          9         10
     6  C    0.000000
     7  H    2.154564   0.000000
     8  H    3.401355   2.485107   0.000000
     9  H    2.155375   4.297897   4.954807   0.000000
    10  H    1.083946   2.482206   4.298352   2.484811   0.000000
    11  C    3.767797   5.363376   4.659880   2.665880   4.631298
    12  O    4.200136   6.080178   5.736914   2.486615   4.855848
    13  C    4.281684   4.632795   2.666545   4.661946   5.365601
    14  C    4.960735   6.209962   4.909763   4.144235   5.923880
    15  C    5.154926   5.922593   4.141002   4.913107   6.211299
    16  C    6.208199   7.581451   6.288458   5.067237   7.108584
    17  C    6.520847   7.116110   5.075965   6.290742   7.586654
    18  C    7.361782   8.522038   6.913454   6.398825   8.318287
    19  H    6.406689   8.009361   6.996740   4.936524   7.199611
    20  C    7.513548   8.337081   6.414190   6.936763   8.544177
    21  H    6.937710   7.213617   4.951482   7.003780   8.020526
    22  H    8.544420   9.259685   7.210870   8.018369   9.586619
    23  Br   9.066538  10.365729   8.823292   7.843387   9.963301
    24  O    5.017698   4.854323   2.484248   5.738094   6.080178
                   11         12         13         14         15
    11  C    0.000000
    12  O    1.223212   0.000000
    13  C    2.949746   4.172942   0.000000
    14  C    1.490676   2.365504   2.519844   0.000000
    15  C    2.523992   3.630553   1.486593   1.404879   0.000000
    16  C    2.482501   2.794086   3.796928   1.395977   2.427142
    17  C    3.797040   4.784750   2.488995   2.420150   1.397226
    18  C    3.757076   4.180344   4.264837   2.401057   2.778398
    19  H    2.664231   2.469142   4.661797   2.144098   3.402670
    20  C    4.288604   5.016488   3.772695   2.798144   2.421439
    21  H    4.664888   5.734628   2.674364   3.397410   2.143772
    22  H    5.370977   6.076247   4.638786   3.880582   3.403733
    23  Br   5.332388   5.424969   6.176352   4.165420   4.689961
    24  O    4.173908   5.397098   1.224163   3.628468   2.363587
                   16         17         18         19         20
    16  C    0.000000
    17  C    2.792835   0.000000
    18  C    1.387535   2.398300   0.000000
    19  H    1.081605   3.874394   2.159139   0.000000
    20  C    2.428129   1.388513   1.395523   3.413392   0.000000
    21  H    3.875386   1.082586   3.384530   4.956913   2.147157
    22  H    3.406818   2.150619   2.157454   4.307076   1.082454
    23  Br   2.859003   4.161642   1.911567   2.981583   2.864698
    24  O    4.789500   2.807128   4.997058   5.736110   4.195058
                   21         22         23         24
    21  H    0.000000
    22  H    2.481701   0.000000
    23  Br   5.011822   2.971549   0.000000
    24  O    2.487306   4.854208   6.874694   0.000000
 Stoichiometry    C14H7BrO2
 Framework group  C1[X(C14H7BrO2)]
 Deg. of freedom    66
 Full point group                 C1      NOp   1
 RotChk:  IX=2 Diff= 8.00D-06
 Largest Abelian subgroup         C1      NOp   1
 Largest concise Abelian subgroup C1      NOp   1
                         Standard orientation:                         
 ---------------------------------------------------------------------
 Center     Atomic      Atomic             Coordinates (Angstroms)
 Number     Number       Type             X           Y           Z
 ---------------------------------------------------------------------
      1          6           0       -5.088092    0.054699    0.000006
      2          6           0       -4.052824    0.982846   -0.000028
      3          6           0       -2.722773    0.555482   -0.000138
      4          6           0       -2.434870   -0.822412   -0.000168
      5          6           0       -3.481869   -1.747703   -0.000154
      6          6           0       -4.802232   -1.312606   -0.000066
      7          1           0       -6.117669    0.393785    0.000080
      8          1           0       -4.260791    2.045378    0.000000
      9          1           0       -3.246666   -2.804535   -0.000186
     10          1           0       -5.609594   -2.035866   -0.000043
     11          6           0       -1.034438   -1.316931   -0.000153
     12          8           0       -0.777224   -2.512795   -0.000411
     13          6           0       -1.636845    1.570647   -0.000294
     14          6           0        0.053639   -0.298009   -0.000116
     15          6           0       -0.234613    1.076981   -0.000089
     16          6           0        1.379131   -0.735985   -0.000051
     17          6           0        0.814965    1.999274    0.000066
     18          6           0        2.402196    0.201347    0.000080
     19          1           0        1.586073   -1.797609   -0.000080
     20          6           0        2.135850    1.571217    0.000151
     21          1           0        0.586164    3.057406    0.000091
     22          1           0        2.945958    2.289153    0.000261
     23         35           0        4.217896   -0.396415    0.000193
     24          8           0       -1.884424    2.769513    0.000267
 ---------------------------------------------------------------------
 Rotational constants (GHZ):      1.0090756      0.1765797      0.1502817
 Leave Link  202 at Wed Jan 08 21:47:11 2020, MaxMem=   134217728 cpu:         0.0
 (Enter E:\Gaussian\G09W\l301.exe)
 Standard basis: 6-311+G(d) (5D, 7F)
 Ernie: Thresh=  0.10000D-02 Tol=  0.10000D-05 Strict=F.
 There are   440 symmetry adapted cartesian basis functions of A   symmetry.
 There are   421 symmetry adapted basis functions of A   symmetry.
   421 basis functions,   705 primitive gaussians,   440 cartesian basis functions
    71 alpha electrons       71 beta electrons
       nuclear repulsion energy      1372.3998365762 Hartrees.
 IExCor=  402 DFT=T Ex+Corr=B3LYP ExCW=0 ScaHFX=  0.200000
 ScaDFX=  0.800000  0.720000  1.000000  0.810000 ScalE2=  1.000000  1.000000
 IRadAn=      0 IRanWt=     -1 IRanGd=            0 ICorTp=0 IEmpDi=141
 NAtoms=   24 NActive=   24 NUniq=   24 SFac= 1.00D+00 NAtFMM=   60 NAOKFM=F Big=F
 Integral buffers will be    262144 words long.
 Raffenetti 2 integral format.
 Two-electron integral symmetry is turned on.
 R6Disp:  Grimme-D3(BJ) Dispersion energy=       -0.0618839582 Hartrees.
 Nuclear repulsion after empirical dispersion term =     1372.3379526180 Hartrees.
 ------------------------------------------------------------------------------
 Polarizable Continuum Model (PCM)
 =================================
 Model                : PCM (using non-symmetric T matrix).
 Atomic radii         : UFF (Universal Force Field).
 Polarization charges : Total charges.
 Charge compensation  : None.
 Solution method      : On-the-fly selection.
 Cavity type          : Scaled VdW (van der Waals Surface) (Alpha=1.100).
 Cavity algorithm     : GePol (No added spheres)
                        Default sphere list used, NSphG=   24.
                        Lebedev-Laikov grids with approx.  5.0 points / Ang**2.
                        Smoothing algorithm: Karplus/York (Gamma=1.0000).
                        Polarization charges: spherical gaussians, with
                                              point-specific exponents (IZeta= 3).
                        Self-potential: point-specific (ISelfS= 7).
                        Self-field    : sphere-specific E.n sum rule (ISelfD= 2).
 1st derivatives      : Analytical E(r).r(x)/FMM algorithm (CHGder, D1EAlg=3).
                        Cavity 1st derivative terms included.
 Solvent              : Acetonitrile, Eps=  35.688000 Eps(inf)=   1.806874
 ------------------------------------------------------------------------------
 GePol: Number of generator spheres                  =      24
 GePol: Total number of spheres                      =      24
 GePol: Number of exposed spheres                    =      24 (100.00%)
 GePol: Number of points                             =    2170
 GePol: Average weight of points                     =       0.13
 GePol: Minimum weight of points                     =   0.16D-10
 GePol: Maximum weight of points                     =    0.20577
 GePol: Number of points with low weight             =     135
 GePol: Fraction of low-weight points (<1% of avg)   =       6.22%
 GePol: Cavity surface area                          =    279.588 Ang**2
 GePol: Cavity volume                                =    305.347 Ang**3
 Leave Link  301 at Wed Jan 08 21:47:11 2020, MaxMem=   134217728 cpu:         0.0
 (Enter E:\Gaussian\G09W\l302.exe)
 NPDir=0 NMtPBC=     1 NCelOv=     1 NCel=       1 NClECP=     1 NCelD=      1
         NCelK=      1 NCelE2=     1 NClLst=     1 CellRange=     0.0.
 One-electron integrals computed using PRISM.
 NBasis=   421 RedAO= T EigKep=  1.62D-06  NBF=   421
 NBsUse=   415 1.00D-06 EigRej=  6.69D-07 NBFU=   415
 Precomputing XC quadrature grid using
 IXCGrd= 4 IRadAn=           0 IRanWt=          -1 IRanGd=           0 AccXCQ= 0.00D+00.
 Generated NRdTot=       0 NPtTot=           0 NUsed=           0 NTot=          16
 NSgBfM=   431   431   431   431   431 MxSgAt=    24 MxSgA2=    24.
 Leave Link  302 at Wed Jan 08 21:47:15 2020, MaxMem=   134217728 cpu:         4.0
 (Enter E:\Gaussian\G09W\l303.exe)
 DipDrv:  MaxL=1.
 Leave Link  303 at Wed Jan 08 21:47:16 2020, MaxMem=   134217728 cpu:         1.0
 (Enter E:\Gaussian\G09W\l401.exe)
 Initial guess from the checkpoint file:  "E:\Gaussian file\2-BrAQ ground state opt.chk"
 B after Tr=     0.000000    0.000000    0.000000
         Rot=    1.000000   -0.000092    0.000042   -0.000002 Ang=  -0.01 deg.
 Guess basis will be translated and rotated to current coordinates.
 JPrj=2 DoOrth=T DoCkMO=T.
 Leave Link  401 at Wed Jan 08 21:47:18 2020, MaxMem=   134217728 cpu:         2.0
 (Enter E:\Gaussian\G09W\l502.exe)
 Closed shell SCF:
 Using DIIS extrapolation, IDIIS=  1040.
 Integral symmetry usage will be decided dynamically.
 IVT=      604602 IEndB=      604602 NGot=   134217728 MDV=   133823807
 LenX=   133823807 LenY=   133629766
 Requested convergence on RMS density matrix=1.00D-08 within 128 cycles.
 Requested convergence on MAX density matrix=1.00D-06.
 Requested convergence on             energy=1.00D-06.
 No special actions if energy rises.
 Fock matrices will be formed incrementally for  20 cycles.

 Cycle   1  Pass 1  IDiag  1:
 FoFJK:  IHMeth= 1 ICntrl=       0 DoSepK=F KAlg= 0 I1Cent=   0 FoldK=F
 IRaf= 830000000 NMat=   1 IRICut=       1 DoRegI=T DoRafI=F ISym2E= 0.
 FoFCou: FMM=F IPFlag=           0 FMFlag=      100000 FMFlg1=           0
         NFxFlg=           0 DoJE=F BraDBF=F KetDBF=F FulRan=T
         wScrn=  0.000000 ICntrl=       0 IOpCl=  0 I1Cent=           0 NGrid=           0
         NMat0=    1 NMatS0=      1 NMatT0=    0 NMatD0=    1 NMtDS0=    0 NMtDT0=    0
 Symmetry not used in FoFCou.
 Inv3:  Mode=1 IEnd=    14126700.
 Iteration    1 A*A^-1 deviation from unit magnitude is 3.89D-15 for   1124.
 Iteration    1 A*A^-1 deviation from orthogonality  is 4.53D-15 for   1124    802.
 Iteration    1 A^-1*A deviation from unit magnitude is 2.22D-15 for   1997.
 Iteration    1 A^-1*A deviation from orthogonality  is 1.38D-13 for   2120   1452.
 E= -3262.55359692709    
 DIIS: error= 2.62D-04 at cycle   1 NSaved=   1.
 NSaved= 1 IEnMin= 1 EnMin= -3262.55359692709     IErMin= 1 ErrMin= 2.62D-04
 ErrMax= 2.62D-04  0.00D+00 EMaxC= 1.00D-01 BMatC= 2.20D-05 BMatP= 2.20D-05
 IDIUse=3 WtCom= 9.97D-01 WtEn= 2.62D-03
 Coeff-Com:  0.100D+01
 Coeff-En:   0.100D+01
 Coeff:      0.100D+01
 Gap=     0.410 Goal=   None    Shift=    0.000
 RMSDP=1.96D-04 MaxDP=6.44D-03              OVMax= 1.31D-03

 Cycle   2  Pass 1  IDiag  1:
 RMSU=  1.95D-04    CP:  1.00D+00
 E= -3262.55362096299     Delta-E=       -0.000024035900 Rises=F Damp=F
 DIIS: error= 5.88D-05 at cycle   2 NSaved=   2.
 NSaved= 2 IEnMin= 2 EnMin= -3262.55362096299     IErMin= 2 ErrMin= 5.88D-05
 ErrMax= 5.88D-05  0.00D+00 EMaxC= 1.00D-01 BMatC= 3.91D-07 BMatP= 2.20D-05
 IDIUse=1 WtCom= 1.00D+00 WtEn= 0.00D+00
 Coeff-Com: -0.269D-01 0.103D+01
 Coeff:     -0.269D-01 0.103D+01
 Gap=     0.145 Goal=   None    Shift=    0.000
 RMSDP=9.75D-06 MaxDP=2.87D-04 DE=-2.40D-05 OVMax= 1.98D-04

 Cycle   3  Pass 1  IDiag  1:
 RMSU=  7.51D-06    CP:  1.00D+00  1.03D+00
 E= -3262.55362114569     Delta-E=       -0.000000182706 Rises=F Damp=F
 DIIS: error= 3.34D-05 at cycle   3 NSaved=   3.
 NSaved= 3 IEnMin= 3 EnMin= -3262.55362114569     IErMin= 3 ErrMin= 3.34D-05
 ErrMax= 3.34D-05  0.00D+00 EMaxC= 1.00D-01 BMatC= 2.79D-07 BMatP= 3.91D-07
 IDIUse=1 WtCom= 1.00D+00 WtEn= 0.00D+00
 Coeff-Com: -0.205D-01 0.472D+00 0.548D+00
 Coeff:     -0.205D-01 0.472D+00 0.548D+00
 Gap=     0.145 Goal=   None    Shift=    0.000
 RMSDP=5.90D-06 MaxDP=2.26D-04 DE=-1.83D-07 OVMax= 2.16D-04

 Cycle   4  Pass 1  IDiag  1:
 RMSU=  4.88D-06    CP:  1.00D+00  1.03D+00  5.84D-01
 E= -3262.55362124456     Delta-E=       -0.000000098866 Rises=F Damp=F
 DIIS: error= 2.80D-05 at cycle   4 NSaved=   4.
 NSaved= 4 IEnMin= 4 EnMin= -3262.55362124456     IErMin= 4 ErrMin= 2.80D-05
 ErrMax= 2.80D-05  0.00D+00 EMaxC= 1.00D-01 BMatC= 1.42D-07 BMatP= 2.79D-07
 IDIUse=1 WtCom= 1.00D+00 WtEn= 0.00D+00
 Coeff-Com: -0.821D-02 0.153D+00 0.405D+00 0.451D+00
 Coeff:     -0.821D-02 0.153D+00 0.405D+00 0.451D+00
 Gap=     0.145 Goal=   None    Shift=    0.000
 RMSDP=3.19D-06 MaxDP=1.26D-04 DE=-9.89D-08 OVMax= 1.06D-04

 Cycle   5  Pass 1  IDiag  1:
 RMSU=  8.54D-07    CP:  1.00D+00  1.03D+00  6.90D-01  4.57D-01
 E= -3262.55362134840     Delta-E=       -0.000000103838 Rises=F Damp=F
 DIIS: error= 3.19D-06 at cycle   5 NSaved=   5.
 NSaved= 5 IEnMin= 5 EnMin= -3262.55362134840     IErMin= 5 ErrMin= 3.19D-06
 ErrMax= 3.19D-06  0.00D+00 EMaxC= 1.00D-01 BMatC= 1.96D-09 BMatP= 1.42D-07
 IDIUse=1 WtCom= 1.00D+00 WtEn= 0.00D+00
 Coeff-Com: -0.165D-02 0.201D-01 0.120D+00 0.180D+00 0.681D+00
 Coeff:     -0.165D-02 0.201D-01 0.120D+00 0.180D+00 0.681D+00
 Gap=     0.145 Goal=   None    Shift=    0.000
 RMSDP=7.98D-07 MaxDP=6.04D-05 DE=-1.04D-07 OVMax= 1.97D-05

 Cycle   6  Pass 1  IDiag  1:
 RMSU=  3.53D-07    CP:  1.00D+00  1.03D+00  7.07D-01  4.92D-01  5.67D-01
 E= -3262.55362134975     Delta-E=       -0.000000001351 Rises=F Damp=F
 DIIS: error= 2.34D-06 at cycle   6 NSaved=   6.
 NSaved= 6 IEnMin= 6 EnMin= -3262.55362134975     IErMin= 6 ErrMin= 2.34D-06
 ErrMax= 2.34D-06  0.00D+00 EMaxC= 1.00D-01 BMatC= 7.93D-10 BMatP= 1.96D-09
 IDIUse=1 WtCom= 1.00D+00 WtEn= 0.00D+00
 Coeff-Com:  0.237D-03-0.137D-01 0.148D-01 0.466D-01 0.446D+00 0.506D+00
 Coeff:      0.237D-03-0.137D-01 0.148D-01 0.466D-01 0.446D+00 0.506D+00
 Gap=     0.145 Goal=   None    Shift=    0.000
 RMSDP=2.87D-07 MaxDP=2.01D-05 DE=-1.35D-09 OVMax= 1.07D-05

 Cycle   7  Pass 1  IDiag  1:
 RMSU=  6.67D-08    CP:  1.00D+00  1.03D+00  7.11D-01  5.04D-01  7.11D-01
                    CP:  5.47D-01
 E= -3262.55362135047     Delta-E=       -0.000000000724 Rises=F Damp=F
 DIIS: error= 2.20D-07 at cycle   7 NSaved=   7.
 NSaved= 7 IEnMin= 7 EnMin= -3262.55362135047     IErMin= 7 ErrMin= 2.20D-07
 ErrMax= 2.20D-07  0.00D+00 EMaxC= 1.00D-01 BMatC= 2.45D-11 BMatP= 7.93D-10
 IDIUse=1 WtCom= 1.00D+00 WtEn= 0.00D+00
 Coeff-Com:  0.228D-03-0.862D-02-0.610D-03 0.112D-01 0.180D+00 0.241D+00
 Coeff-Com:  0.577D+00
 Coeff:      0.228D-03-0.862D-02-0.610D-03 0.112D-01 0.180D+00 0.241D+00
 Coeff:      0.577D+00
 Gap=     0.145 Goal=   None    Shift=    0.000
 RMSDP=4.44D-08 MaxDP=2.08D-06 DE=-7.24D-10 OVMax= 1.73D-06

 Cycle   8  Pass 1  IDiag  1:
 RMSU=  3.06D-08    CP:  1.00D+00  1.03D+00  7.12D-01  5.04D-01  7.27D-01
                    CP:  5.41D-01  6.20D-01
 E= -3262.55362135056     Delta-E=       -0.000000000085 Rises=F Damp=F
 DIIS: error= 8.10D-08 at cycle   8 NSaved=   8.
 NSaved= 8 IEnMin= 8 EnMin= -3262.55362135056     IErMin= 8 ErrMin= 8.10D-08
 ErrMax= 8.10D-08  0.00D+00 EMaxC= 1.00D-01 BMatC= 2.83D-12 BMatP= 2.45D-11
 IDIUse=1 WtCom= 1.00D+00 WtEn= 0.00D+00
 Coeff-Com:  0.802D-04-0.249D-02-0.202D-02 0.113D-03 0.327D-01 0.545D-01
 Coeff-Com:  0.275D+00 0.642D+00
 Coeff:      0.802D-04-0.249D-02-0.202D-02 0.113D-03 0.327D-01 0.545D-01
 Coeff:      0.275D+00 0.642D+00
 Gap=     0.145 Goal=   None    Shift=    0.000
 RMSDP=1.54D-08 MaxDP=7.65D-07 DE=-8.55D-11 OVMax= 5.67D-07

 Cycle   9  Pass 1  IDiag  1:
 RMSU=  1.17D-08    CP:  1.00D+00  1.03D+00  7.12D-01  5.04D-01  7.29D-01
                    CP:  5.47D-01  7.18D-01  8.28D-01
 E= -3262.55362135063     Delta-E=       -0.000000000071 Rises=F Damp=F
 DIIS: error= 3.90D-08 at cycle   9 NSaved=   9.
 NSaved= 9 IEnMin= 9 EnMin= -3262.55362135063     IErMin= 9 ErrMin= 3.90D-08
 ErrMax= 3.90D-08  0.00D+00 EMaxC= 1.00D-01 BMatC= 6.06D-13 BMatP= 2.83D-12
 IDIUse=1 WtCom= 1.00D+00 WtEn= 0.00D+00
 Coeff-Com:  0.700D-05 0.846D-04-0.953D-03-0.167D-02-0.118D-01-0.867D-02
 Coeff-Com:  0.634D-01 0.363D+00 0.596D+00
 Coeff:      0.700D-05 0.846D-04-0.953D-03-0.167D-02-0.118D-01-0.867D-02
 Coeff:      0.634D-01 0.363D+00 0.596D+00
 Gap=     0.145 Goal=   None    Shift=    0.000
 RMSDP=6.57D-09 MaxDP=3.93D-07 DE=-7.09D-11 OVMax= 1.97D-07

 Error on total polarization charges =  0.01852
 SCF Done:  E(RB3LYP) =  -3262.55362135     A.U. after    9 cycles
            NFock=  9  Conv=0.66D-08     -V/T= 2.0018
 KE= 3.256664914794D+03 PE=-1.050034926354D+04 EE= 2.608792774775D+03
 Leave Link  502 at Wed Jan 08 22:05:52 2020, MaxMem=   134217728 cpu:      1113.0
 (Enter E:\Gaussian\G09W\l701.exe)
 Compute integral first derivatives.
 ... and contract with generalized density number  0.
 R6Disp: Adding Grimme-D3(BJ) dispersion energy 1st derivatives to the gradient.
 D1PCM: PCM CHGder 1st derivatives, ID1Alg=3 FixD1E=F DoIter=F DoCFld=F I1PDM=0.
 GePol: Maximum number of non-zero 1st derivatives   =     349
 Leave Link  701 at Wed Jan 08 22:06:22 2020, MaxMem=   134217728 cpu:        30.0
 (Enter E:\Gaussian\G09W\l702.exe)
 L702 exits ... SP integral derivatives will be done elsewhere.
 Leave Link  702 at Wed Jan 08 22:06:22 2020, MaxMem=   134217728 cpu:         0.0
 (Enter E:\Gaussian\G09W\l703.exe)
 Compute integral first derivatives, UseDBF=F ICtDFT=           0.
 Integral derivatives from FoFJK, PRISM(SPDF).
 Calling FoFJK, ICntrl=      2127 FMM=F ISym2X=0 I1Cent= 0 IOpClX= 0 NMat=1 NMatS=1 NMatT=0.
 FoFJK:  IHMeth= 1 ICntrl=    2127 DoSepK=F KAlg= 0 I1Cent=   0 FoldK=F
 IRaf=         0 NMat=   1 IRICut=       1 DoRegI=T DoRafI=F ISym2E= 0.
 FoFCou: FMM=F IPFlag=           0 FMFlag=      100000 FMFlg1=         800
         NFxFlg=           0 DoJE=F BraDBF=F KetDBF=F FulRan=T
         wScrn=  0.000000 ICntrl=    2127 IOpCl=  0 I1Cent=           0 NGrid=           0
         NMat0=    1 NMatS0=      1 NMatT0=    0 NMatD0=    1 NMtDS0=    0 NMtDT0=    0
 Symmetry not used in FoFCou.
 Leave Link  703 at Wed Jan 08 22:13:53 2020, MaxMem=   134217728 cpu:       451.0
 (Enter E:\Gaussian\G09W\l716.exe)
 Dipole        =-8.85070893D-01 1.94267797D-01-8.69861439D-05
 ***** Axes restored to original set *****
 -------------------------------------------------------------------
 Center     Atomic                   Forces (Hartrees/Bohr)
 Number     Number              X              Y              Z
 -------------------------------------------------------------------
      1        6           0.000024182   -0.000037010    0.000001988
      2        6          -0.000042477   -0.000038528   -0.000004661
      3        6          -0.000120168    0.000049907   -0.000028016
      4        6          -0.000081886   -0.000098919    0.000004876
      5        6          -0.000042705    0.000005080    0.000004884
      6        6           0.000015258    0.000022801   -0.000000940
      7        1          -0.000019059    0.000005938    0.000000543
      8        1           0.000016866    0.000034723   -0.000000625
      9        1           0.000046770   -0.000036291    0.000000767
     10        1          -0.000002886   -0.000036773   -0.000000746
     11        6           0.000046903   -0.000174633   -0.000037239
     12        8          -0.000012992    0.000082152    0.000012796
     13        6          -0.000054251    0.000175560    0.000108473
     14        6           0.000119492   -0.000042702    0.000005047
     15        6           0.000102674    0.000090442   -0.000028233
     16        6           0.000032349    0.000067339    0.000004279
     17        6           0.000046556   -0.000008580   -0.000004335
     18        6          -0.000016770    0.000025253   -0.000000235
     19        1          -0.000024147   -0.000037484    0.000000692
     20        6          -0.000020162   -0.000039983    0.000001573
     21        1          -0.000043322    0.000034245   -0.000000438
     22        1          -0.000002443    0.000045873    0.000000392
     23       35           0.000015513    0.000005228   -0.000000584
     24        8           0.000016704   -0.000093635   -0.000040257
 -------------------------------------------------------------------
 Cartesian Forces:  Max     0.000175560 RMS     0.000052717
 Leave Link  716 at Wed Jan 08 22:13:55 2020, MaxMem=   134217728 cpu:         0.0
 (Enter E:\Gaussian\G09W\l103.exe)

 GradGradGradGradGradGradGradGradGradGradGradGradGradGradGradGradGradGrad
 Berny optimization.
 Using GEDIIS/GDIIS optimizer.
 FormGI is forming the generalized inverse of G from B-inverse, IUseBI=4.
 Internal  Forces:  Max     0.000126279 RMS     0.000030460
 Search for a local minimum.
 Step number   4 out of a maximum of  142
 All quantities printed in internal units (Hartrees-Bohrs-Radians)
 RMS Force = .30460D-04 SwitMx=.10000D-02 MixMth= 2
 Mixed Optimization -- En-DIIS/RFO-DIIS
 Swapping is turned off.
 Update second derivatives using D2CorX and points    1    2    3    4
 DE= -4.13D-06 DEPred=-4.81D-06 R= 8.59D-01
 TightC=F SS=  1.41D+00  RLast= 1.61D-02 DXNew= 2.5227D-01 4.8186D-02
 Trust test= 8.59D-01 RLast= 1.61D-02 DXMaxT set to 1.50D-01
 ITU=  1 -1  1  0
     Eigenvalues ---    0.00892   0.00894   0.01230   0.01537   0.01669
     Eigenvalues ---    0.01728   0.01770   0.01805   0.02147   0.02148
     Eigenvalues ---    0.02161   0.02164   0.02168   0.02170   0.02176
     Eigenvalues ---    0.02186   0.02191   0.02193   0.02198   0.02216
     Eigenvalues ---    0.04051   0.15211   0.16000   0.16000   0.16000
     Eigenvalues ---    0.16000   0.16006   0.16049   0.18249   0.21990
     Eigenvalues ---    0.22031   0.22458   0.22633   0.23869   0.24497
     Eigenvalues ---    0.24719   0.25000   0.25000   0.25000   0.25004
     Eigenvalues ---    0.25036   0.31596   0.31977   0.32730   0.33422
     Eigenvalues ---    0.35477   0.35504   0.35611   0.35621   0.35653
     Eigenvalues ---    0.35705   0.35815   0.39140   0.41703   0.42266
     Eigenvalues ---    0.42523   0.44839   0.45321   0.46094   0.46673
     Eigenvalues ---    0.46705   0.46898   0.47156   0.48895   0.79978
     Eigenvalues ---    0.94566
 En-DIIS/RFO-DIIS IScMMF=        0 using points:     4    3    2    1
 RFO step:  Lambda=-2.19921227D-07.
 NNeg= 0 NP= 4 Switch=  2.50D-03 Rises=F DC=  2.72D-05 SmlDif=  1.00D-05
 RMS Error=  0.5888578897D-04 NUsed= 4 EDIIS=F
 DidBck=F Rises=F RFO-DIIS coefs:    0.86305    0.06726    0.01078    0.05892
 Iteration  1 RMS(Cart)=  0.00032762 RMS(Int)=  0.00000009
 Iteration  2 RMS(Cart)=  0.00000011 RMS(Int)=  0.00000006
 ITry= 1 IFail=0 DXMaxC= 1.55D-03 DCOld= 1.00D+10 DXMaxT= 1.50D-01 DXLimC= 3.00D+00 Rises=F
 Variable       Old X    -DE/DX   Delta X   Delta X   Delta X     New X
                                 (Linear)    (Quad)   (Total)
    R1        2.62749   0.00001   0.00001   0.00000   0.00001   2.62750
    R2        2.63970   0.00002   0.00002   0.00001   0.00004   2.63973
    R3        2.04842   0.00002   0.00004   0.00003   0.00006   2.04849
    R4        2.63999   0.00000   0.00005  -0.00004   0.00000   2.64000
    R5        2.04599   0.00004   0.00006   0.00005   0.00011   2.04610
    R6        2.66007   0.00011   0.00003   0.00018   0.00021   2.66029
    R7        2.80915   0.00012   0.00035   0.00004   0.00039   2.80954
    R8        2.64046   0.00000   0.00005  -0.00004   0.00000   2.64047
    R9        2.80658   0.00012   0.00036   0.00003   0.00040   2.80698
   R10        2.62710   0.00001   0.00001   0.00000   0.00001   2.62712
   R11        2.04599   0.00004   0.00006   0.00005   0.00011   2.04609
   R12        2.04836   0.00002   0.00004   0.00002   0.00006   2.04842
   R13        2.31154  -0.00008  -0.00023   0.00008  -0.00015   2.31138
   R14        2.81697   0.00012   0.00036   0.00004   0.00040   2.81737
   R15        2.80925   0.00013   0.00040   0.00003   0.00042   2.80968
   R16        2.31333  -0.00010  -0.00025   0.00008  -0.00017   2.31316
   R17        2.65484   0.00009   0.00000   0.00016   0.00017   2.65500
   R18        2.63801  -0.00002   0.00006  -0.00010  -0.00003   2.63798
   R19        2.64037   0.00000   0.00002  -0.00003  -0.00001   2.64036
   R20        2.62206   0.00001   0.00000  -0.00002  -0.00002   2.62205
   R21        2.04394   0.00004   0.00005   0.00006   0.00011   2.04405
   R22        2.62391   0.00000   0.00004  -0.00004   0.00000   2.62391
   R23        2.04579   0.00004   0.00005   0.00005   0.00010   2.04589
   R24        2.63716   0.00001   0.00003  -0.00002   0.00001   2.63716
   R25        3.61234   0.00002   0.00029  -0.00023   0.00006   3.61240
   R26        2.04554   0.00003   0.00003   0.00004   0.00007   2.04561
    A1        2.09559   0.00001   0.00000   0.00003   0.00003   2.09562
    A2        2.09254  -0.00002  -0.00002  -0.00008  -0.00010   2.09245
    A3        2.09505   0.00001   0.00001   0.00005   0.00006   2.09512
    A4        2.09980  -0.00001   0.00000  -0.00003  -0.00003   2.09977
    A5        2.10841   0.00003   0.00016   0.00007   0.00023   2.10864
    A6        2.07497  -0.00003  -0.00016  -0.00004  -0.00020   2.07478
    A7        2.08767   0.00000   0.00000   0.00000   0.00000   2.08767
    A8        2.07897   0.00002  -0.00005   0.00007   0.00002   2.07899
    A9        2.11655  -0.00001   0.00005  -0.00007  -0.00002   2.11653
   A10        2.08858  -0.00001  -0.00001   0.00001   0.00000   2.08858
   A11        2.11623  -0.00001   0.00005  -0.00006  -0.00001   2.11622
   A12        2.07838   0.00002  -0.00004   0.00006   0.00002   2.07839
   A13        2.09950  -0.00001   0.00000  -0.00003  -0.00003   2.09947
   A14        2.07558  -0.00003  -0.00016  -0.00004  -0.00020   2.07538
   A15        2.10811   0.00003   0.00016   0.00008   0.00023   2.10834
   A16        2.09522   0.00001   0.00001   0.00003   0.00004   2.09526
   A17        2.09520   0.00001   0.00001   0.00004   0.00005   2.09526
   A18        2.09276  -0.00002  -0.00002  -0.00007  -0.00009   2.09267
   A19        2.12211  -0.00001   0.00005  -0.00008  -0.00003   2.12208
   A20        2.04955   0.00002  -0.00010   0.00012   0.00002   2.04957
   A21        2.11153  -0.00001   0.00005  -0.00004   0.00001   2.11153
   A22        2.05135   0.00002  -0.00010   0.00014   0.00004   2.05139
   A23        2.11888  -0.00001   0.00007  -0.00007   0.00001   2.11889
   A24        2.11295  -0.00002   0.00003  -0.00008  -0.00005   2.11290
   A25        2.11674   0.00000   0.00006  -0.00004   0.00001   2.11675
   A26        2.06987   0.00001  -0.00005   0.00006   0.00001   2.06988
   A27        2.09657  -0.00001   0.00000  -0.00002  -0.00002   2.09655
   A28        2.11595  -0.00001   0.00005  -0.00008  -0.00004   2.11591
   A29        2.08215   0.00002  -0.00004   0.00007   0.00003   2.08218
   A30        2.08509   0.00000  -0.00001   0.00001   0.00000   2.08509
   A31        2.08077   0.00001   0.00003  -0.00003   0.00000   2.08077
   A32        2.08244  -0.00004  -0.00024  -0.00004  -0.00028   2.08216
   A33        2.11997   0.00004   0.00021   0.00007   0.00028   2.12025
   A34        2.10727   0.00000   0.00000  -0.00003  -0.00003   2.10724
   A35        2.07878  -0.00003  -0.00014  -0.00004  -0.00017   2.07861
   A36        2.09714   0.00003   0.00014   0.00006   0.00020   2.09734
   A37        2.12045   0.00000  -0.00005   0.00006   0.00001   2.12047
   A38        2.08186  -0.00001   0.00002  -0.00006  -0.00004   2.08181
   A39        2.08087   0.00001   0.00003   0.00000   0.00003   2.08091
   A40        2.07622   0.00001   0.00003   0.00000   0.00003   2.07625
   A41        2.10305  -0.00003  -0.00009  -0.00008  -0.00017   2.10288
   A42        2.10391   0.00002   0.00006   0.00008   0.00014   2.10405
    D1        0.00000   0.00000   0.00000   0.00000  -0.00001   0.00000
    D2        3.14156   0.00000   0.00003   0.00000   0.00003   3.14159
    D3       -3.14158   0.00000  -0.00002   0.00000  -0.00001   3.14159
    D4       -0.00002   0.00000   0.00001   0.00001   0.00002   0.00000
    D5        0.00001   0.00000  -0.00001   0.00000  -0.00001   0.00000
    D6       -3.14159   0.00000   0.00000   0.00000   0.00000  -3.14159
    D7       -3.14159   0.00000   0.00000  -0.00001   0.00000  -3.14159
    D8       -0.00001   0.00000   0.00001  -0.00001   0.00001   0.00000
    D9       -0.00004   0.00000   0.00004   0.00000   0.00004   0.00000
   D10        3.14150   0.00001   0.00008   0.00001   0.00009   3.14159
   D11        3.14159   0.00000   0.00000   0.00000   0.00000   3.14159
   D12       -0.00006   0.00000   0.00005   0.00001   0.00006   0.00000
   D13        0.00006   0.00000  -0.00005   0.00000  -0.00005   0.00001
   D14       -3.14149  -0.00001  -0.00009   0.00003  -0.00007  -3.14156
   D15       -3.14148  -0.00001  -0.00010  -0.00001  -0.00011  -3.14159
   D16        0.00016  -0.00001  -0.00014   0.00001  -0.00013   0.00003
   D17        3.14135   0.00001   0.00013   0.00048   0.00061  -3.14123
   D18        0.00057  -0.00002  -0.00047  -0.00047  -0.00093  -0.00037
   D19       -0.00030   0.00001   0.00017   0.00049   0.00066   0.00037
   D20       -3.14108  -0.00002  -0.00042  -0.00045  -0.00087   3.14123
   D21       -0.00004   0.00000   0.00004  -0.00001   0.00003  -0.00001
   D22        3.14158   0.00000   0.00001   0.00001   0.00001  -3.14159
   D23        3.14151   0.00000   0.00008  -0.00003   0.00005   3.14156
   D24       -0.00006   0.00000   0.00005  -0.00002   0.00003  -0.00002
   D25       -3.14137  -0.00001  -0.00034   0.00061   0.00027  -3.14110
   D26       -0.00001   0.00000   0.00009  -0.00052  -0.00042  -0.00043
   D27        0.00027  -0.00001  -0.00038   0.00063   0.00025   0.00052
   D28       -3.14155   0.00000   0.00005  -0.00049  -0.00044   3.14119
   D29        0.00000   0.00000  -0.00001   0.00001   0.00000   0.00000
   D30       -3.14158   0.00000  -0.00002   0.00001  -0.00001  -3.14159
   D31        3.14157   0.00000   0.00002  -0.00001   0.00002   3.14158
   D32       -0.00002   0.00000   0.00001  -0.00001   0.00001  -0.00001
   D33        0.00001   0.00000  -0.00009   0.00052   0.00043   0.00043
   D34        3.14155   0.00000  -0.00005   0.00049   0.00045  -3.14119
   D35        3.14137   0.00001   0.00034  -0.00060  -0.00026   3.14111
   D36       -0.00027   0.00001   0.00038  -0.00062  -0.00024  -0.00051
   D37        0.00030  -0.00001  -0.00017  -0.00049  -0.00066  -0.00036
   D38       -3.14135  -0.00001  -0.00013  -0.00048  -0.00060   3.14123
   D39        3.14108   0.00002   0.00042   0.00045   0.00087  -3.14123
   D40       -0.00057   0.00002   0.00046   0.00046   0.00093   0.00036
   D41       -0.00016   0.00001   0.00014  -0.00002   0.00012  -0.00004
   D42        3.14149   0.00001   0.00009  -0.00003   0.00006   3.14156
   D43        3.14148   0.00001   0.00009   0.00001   0.00010   3.14158
   D44       -0.00005   0.00000   0.00005   0.00000   0.00004  -0.00001
   D45       -3.14151   0.00000  -0.00008   0.00003  -0.00004  -3.14156
   D46        0.00005   0.00000  -0.00005   0.00002  -0.00003   0.00003
   D47        0.00003   0.00000  -0.00003   0.00001  -0.00003   0.00001
   D48       -3.14159   0.00000   0.00000  -0.00001  -0.00001   3.14159
   D49       -3.14150  -0.00001  -0.00008  -0.00001  -0.00009  -3.14159
   D50        0.00006   0.00000  -0.00005  -0.00001  -0.00006   0.00000
   D51        0.00004   0.00000  -0.00003   0.00000  -0.00003   0.00000
   D52       -3.14159   0.00000   0.00000   0.00000   0.00000  -3.14159
   D53        0.00000   0.00000   0.00000  -0.00001   0.00000   0.00000
   D54        3.14158   0.00000   0.00002   0.00000   0.00001   3.14159
   D55       -3.14156   0.00000  -0.00003   0.00001  -0.00002  -3.14158
   D56        0.00001   0.00000  -0.00001   0.00001   0.00000   0.00001
   D57        0.00000   0.00000   0.00000   0.00000   0.00000   0.00000
   D58        3.14158   0.00000   0.00001   0.00000   0.00001  -3.14159
   D59       -3.14156   0.00000  -0.00003   0.00000  -0.00003  -3.14159
   D60        0.00002   0.00000  -0.00001  -0.00001  -0.00002   0.00000
   D61       -0.00002   0.00000   0.00001   0.00000   0.00001   0.00000
   D62        3.14159   0.00000   0.00000   0.00001   0.00001   3.14159
   D63        3.14159   0.00000   0.00000   0.00000   0.00000   3.14159
   D64        0.00001   0.00000  -0.00001   0.00001  -0.00001   0.00000
         Item               Value     Threshold  Converged?
 Maximum Force            0.000126     0.000450     YES
 RMS     Force            0.000030     0.000300     YES
 Maximum Displacement     0.001551     0.001800     YES
 RMS     Displacement     0.000328     0.001200     YES
 Predicted change in Energy=-2.279953D-07
 Optimization completed.
    -- Stationary point found.
                           ----------------------------
                           !   Optimized Parameters   !
                           ! (Angstroms and Degrees)  !
 --------------------------                            --------------------------
 ! Name  Definition              Value          Derivative Info.                !
 --------------------------------------------------------------------------------
 ! R1    R(1,2)                  1.3904         -DE/DX =    0.0                 !
 ! R2    R(1,6)                  1.3969         -DE/DX =    0.0                 !
 ! R3    R(1,7)                  1.084          -DE/DX =    0.0                 !
 ! R4    R(2,3)                  1.397          -DE/DX =    0.0                 !
 ! R5    R(2,8)                  1.0827         -DE/DX =    0.0                 !
 ! R6    R(3,4)                  1.4077         -DE/DX =    0.0001              !
 ! R7    R(3,13)                 1.4865         -DE/DX =    0.0001              !
 ! R8    R(4,5)                  1.3973         -DE/DX =    0.0                 !
 ! R9    R(4,11)                 1.4852         -DE/DX =    0.0001              !
 ! R10   R(5,6)                  1.3902         -DE/DX =    0.0                 !
 ! R11   R(5,9)                  1.0827         -DE/DX =    0.0                 !
 ! R12   R(6,10)                 1.0839         -DE/DX =    0.0                 !
 ! R13   R(11,12)                1.2232         -DE/DX =   -0.0001              !
 ! R14   R(11,14)                1.4907         -DE/DX =    0.0001              !
 ! R15   R(13,15)                1.4866         -DE/DX =    0.0001              !
 ! R16   R(13,24)                1.2242         -DE/DX =   -0.0001              !
 ! R17   R(14,15)                1.4049         -DE/DX =    0.0001              !
 ! R18   R(14,16)                1.396          -DE/DX =    0.0                 !
 ! R19   R(15,17)                1.3972         -DE/DX =    0.0                 !
 ! R20   R(16,18)                1.3875         -DE/DX =    0.0                 !
 ! R21   R(16,19)                1.0816         -DE/DX =    0.0                 !
 ! R22   R(17,20)                1.3885         -DE/DX =    0.0                 !
 ! R23   R(17,21)                1.0826         -DE/DX =    0.0                 !
 ! R24   R(18,20)                1.3955         -DE/DX =    0.0                 !
 ! R25   R(18,23)                1.9116         -DE/DX =    0.0                 !
 ! R26   R(20,22)                1.0825         -DE/DX =    0.0                 !
 ! A1    A(2,1,6)              120.0684         -DE/DX =    0.0                 !
 ! A2    A(2,1,7)              119.8938         -DE/DX =    0.0                 !
 ! A3    A(6,1,7)              120.0377         -DE/DX =    0.0                 !
 ! A4    A(1,2,3)              120.31           -DE/DX =    0.0                 !
 ! A5    A(1,2,8)              120.8027         -DE/DX =    0.0                 !
 ! A6    A(3,2,8)              118.8873         -DE/DX =    0.0                 !
 ! A7    A(2,3,4)              119.6147         -DE/DX =    0.0                 !
 ! A8    A(2,3,13)             119.116          -DE/DX =    0.0                 !
 ! A9    A(4,3,13)             121.2693         -DE/DX =    0.0                 !
 ! A10   A(3,4,5)              119.667          -DE/DX =    0.0                 !
 ! A11   A(3,4,11)             121.2509         -DE/DX =    0.0                 !
 ! A12   A(5,4,11)             119.0821         -DE/DX =    0.0                 !
 ! A13   A(4,5,6)              120.2927         -DE/DX =    0.0                 !
 ! A14   A(4,5,9)              118.9218         -DE/DX =    0.0                 !
 ! A15   A(6,5,9)              120.7855         -DE/DX =    0.0                 !
 ! A16   A(1,6,5)              120.0472         -DE/DX =    0.0                 !
 ! A17   A(1,6,10)             120.0463         -DE/DX =    0.0                 !
 ! A18   A(5,6,10)             119.9065         -DE/DX =    0.0                 !
 ! A19   A(4,11,12)            121.5877         -DE/DX =    0.0                 !
 ! A20   A(4,11,14)            117.4308         -DE/DX =    0.0                 !
 ! A21   A(12,11,14)           120.9815         -DE/DX =    0.0                 !
 ! A22   A(3,13,15)            117.5339         -DE/DX =    0.0                 !
 ! A23   A(3,13,24)            121.4029         -DE/DX =    0.0                 !
 ! A24   A(15,13,24)           121.0632         -DE/DX =    0.0                 !
 ! A25   A(11,14,15)           121.2802         -DE/DX =    0.0                 !
 ! A26   A(11,14,16)           118.595          -DE/DX =    0.0                 !
 ! A27   A(15,14,16)           120.1249         -DE/DX =    0.0                 !
 ! A28   A(13,15,14)           121.235          -DE/DX =    0.0                 !
 ! A29   A(13,15,17)           119.2983         -DE/DX =    0.0                 !
 ! A30   A(14,15,17)           119.4667         -DE/DX =    0.0                 !
 ! A31   A(14,16,18)           119.2192         -DE/DX =    0.0                 !
 ! A32   A(14,16,19)           119.3152         -DE/DX =    0.0                 !
 ! A33   A(18,16,19)           121.4656         -DE/DX =    0.0                 !
 ! A34   A(15,17,20)           120.7375         -DE/DX =    0.0                 !
 ! A35   A(15,17,21)           119.1054         -DE/DX =    0.0                 !
 ! A36   A(20,17,21)           120.1571         -DE/DX =    0.0                 !
 ! A37   A(16,18,20)           121.4931         -DE/DX =    0.0                 !
 ! A38   A(16,18,23)           119.2816         -DE/DX =    0.0                 !
 ! A39   A(20,18,23)           119.2253         -DE/DX =    0.0                 !
 ! A40   A(17,20,18)           118.9587         -DE/DX =    0.0                 !
 ! A41   A(17,20,22)           120.4961         -DE/DX =    0.0                 !
 ! A42   A(18,20,22)           120.5452         -DE/DX =    0.0                 !
 ! D1    D(6,1,2,3)              0.0002         -DE/DX =    0.0                 !
 ! D2    D(6,1,2,8)            179.9983         -DE/DX =    0.0                 !
 ! D3    D(7,1,2,3)            180.0008         -DE/DX =    0.0                 !
 ! D4    D(7,1,2,8)             -0.0011         -DE/DX =    0.0                 !
 ! D5    D(2,1,6,5)              0.0008         -DE/DX =    0.0                 !
 ! D6    D(2,1,6,10)          -179.9998         -DE/DX =    0.0                 !
 ! D7    D(7,1,6,5)           -179.9997         -DE/DX =    0.0                 !
 ! D8    D(7,1,6,10)            -0.0004         -DE/DX =    0.0                 !
 ! D9    D(1,2,3,4)             -0.0022         -DE/DX =    0.0                 !
 ! D10   D(1,2,3,13)           179.9946         -DE/DX =    0.0                 !
 ! D11   D(8,2,3,4)            179.9996         -DE/DX =    0.0                 !
 ! D12   D(8,2,3,13)            -0.0035         -DE/DX =    0.0                 !
 ! D13   D(2,3,4,5)              0.0032         -DE/DX =    0.0                 !
 ! D14   D(2,3,4,11)          -179.9941         -DE/DX =    0.0                 !
 ! D15   D(13,3,4,5)          -179.9936         -DE/DX =    0.0                 !
 ! D16   D(13,3,4,11)            0.0091         -DE/DX =    0.0                 !
 ! D17   D(2,3,13,15)         -180.0139         -DE/DX =    0.0                 !
 ! D18   D(2,3,13,24)            0.0325         -DE/DX =    0.0                 !
 ! D19   D(4,3,13,15)           -0.0171         -DE/DX =    0.0                 !
 ! D20   D(4,3,13,24)          180.0293         -DE/DX =    0.0                 !
 ! D21   D(3,4,5,6)             -0.0022         -DE/DX =    0.0                 !
 ! D22   D(3,4,5,9)           -180.0005         -DE/DX =    0.0                 !
 ! D23   D(11,4,5,6)           179.9951         -DE/DX =    0.0                 !
 ! D24   D(11,4,5,9)            -0.0032         -DE/DX =    0.0                 !
 ! D25   D(3,4,11,12)         -179.9872         -DE/DX =    0.0                 !
 ! D26   D(3,4,11,14)           -0.0004         -DE/DX =    0.0                 !
 ! D27   D(5,4,11,12)            0.0155         -DE/DX =    0.0                 !
 ! D28   D(5,4,11,14)          180.0023         -DE/DX =    0.0                 !
 ! D29   D(4,5,6,1)              0.0002         -DE/DX =    0.0                 !
 ! D30   D(4,5,6,10)          -179.9992         -DE/DX =    0.0                 !
 ! D31   D(9,5,6,1)            179.9984         -DE/DX =    0.0                 !
 ! D32   D(9,5,6,10)            -0.0009         -DE/DX =    0.0                 !
 ! D33   D(4,11,14,15)           0.0004         -DE/DX =    0.0                 !
 ! D34   D(4,11,14,16)        -180.0023         -DE/DX =    0.0                 !
 ! D35   D(12,11,14,15)        179.9872         -DE/DX =    0.0                 !
 ! D36   D(12,11,14,16)         -0.0155         -DE/DX =    0.0                 !
 ! D37   D(3,13,15,14)           0.017          -DE/DX =    0.0                 !
 ! D38   D(3,13,15,17)         180.0137         -DE/DX =    0.0                 !
 ! D39   D(24,13,15,14)       -180.0293         -DE/DX =    0.0                 !
 ! D40   D(24,13,15,17)         -0.0325         -DE/DX =    0.0                 !
 ! D41   D(11,14,15,13)         -0.0089         -DE/DX =    0.0                 !
 ! D42   D(11,14,15,17)        179.9943         -DE/DX =    0.0                 !
 ! D43   D(16,14,15,13)        179.9938         -DE/DX =    0.0                 !
 ! D44   D(16,14,15,17)         -0.0029         -DE/DX =    0.0                 !
 ! D45   D(11,14,16,18)       -179.9954         -DE/DX =    0.0                 !
 ! D46   D(11,14,16,19)          0.0031         -DE/DX =    0.0                 !
 ! D47   D(15,14,16,18)          0.0019         -DE/DX =    0.0                 !
 ! D48   D(15,14,16,19)        180.0004         -DE/DX =    0.0                 !
 ! D49   D(13,15,17,20)       -179.9948         -DE/DX =    0.0                 !
 ! D50   D(13,15,17,21)          0.0035         -DE/DX =    0.0                 !
 ! D51   D(14,15,17,20)          0.002          -DE/DX =    0.0                 !
 ! D52   D(14,15,17,21)       -179.9997         -DE/DX =    0.0                 !
 ! D53   D(14,16,18,20)          0.0001         -DE/DX =    0.0                 !
 ! D54   D(14,16,18,23)        179.9992         -DE/DX =    0.0                 !
 ! D55   D(19,16,18,20)       -179.9984         -DE/DX =    0.0                 !
 ! D56   D(19,16,18,23)          0.0007         -DE/DX =    0.0                 !
 ! D57   D(15,17,20,18)          0.0            -DE/DX =    0.0                 !
 ! D58   D(15,17,20,22)       -180.0007         -DE/DX =    0.0                 !
 ! D59   D(21,17,20,18)       -179.9983         -DE/DX =    0.0                 !
 ! D60   D(21,17,20,22)          0.0011         -DE/DX =    0.0                 !
 ! D61   D(16,18,20,17)         -0.001          -DE/DX =    0.0                 !
 ! D62   D(16,18,20,22)        179.9996         -DE/DX =    0.0                 !
 ! D63   D(23,18,20,17)        179.9999         -DE/DX =    0.0                 !
 ! D64   D(23,18,20,22)          0.0005         -DE/DX =    0.0                 !
 --------------------------------------------------------------------------------
 Lowest energy point so far.  Saving SCF results.
 GradGradGradGradGradGradGradGradGradGradGradGradGradGradGradGradGradGrad

 Largest change from initial coordinates is atom   23       0.002 Angstoms.
 Leave Link  103 at Wed Jan 08 22:13:56 2020, MaxMem=   134217728 cpu:         0.0
 (Enter E:\Gaussian\G09W\l202.exe)
                          Input orientation:                          
 ---------------------------------------------------------------------
 Center     Atomic      Atomic             Coordinates (Angstroms)
 Number     Number       Type             X           Y           Z
 ---------------------------------------------------------------------
      1          6           0       -2.796231    0.769754    0.000060
      2          6           0       -1.761035    1.697981    0.000026
      3          6           0       -0.430951    1.270721   -0.000084
      4          6           0       -0.142940   -0.107150   -0.000114
      5          6           0       -1.189867   -1.032523   -0.000100
      6          6           0       -2.510264   -0.597528   -0.000012
      7          1           0       -3.825835    1.108760    0.000134
      8          1           0       -1.969085    2.760498    0.000055
      9          1           0       -0.954581   -2.089337   -0.000132
     10          1           0       -3.317570   -1.320852    0.000012
     11          6           0        1.257531   -0.601560   -0.000099
     12          8           0        1.514838   -1.797403   -0.000357
     13          6           0        0.654898    2.285971   -0.000240
     14          6           0        2.345528    0.417448   -0.000062
     15          6           0        2.057168    1.792415   -0.000034
     16          6           0        3.671054   -0.020425    0.000003
     17          6           0        3.106674    2.714790    0.000121
     18          6           0        4.694046    0.916987    0.000134
     19          1           0        3.878079   -1.082033   -0.000026
     20          6           0        4.427592    2.286837    0.000205
     21          1           0        2.877791    3.772904    0.000145
     22          1           0        5.237644    3.004835    0.000315
     23         35           0        6.509792    0.319367    0.000247
     24          8           0        0.407225    3.484818    0.000321
 ---------------------------------------------------------------------
                    Distance matrix (angstroms):
                    1          2          3          4          5
     1  C    0.000000
     2  C    1.390409   0.000000
     3  C    2.417751   1.397024   0.000000
     4  C    2.794443   2.424197   1.407651   0.000000
     5  C    2.414250   2.789603   2.425054   1.397272   0.000000
     6  C    1.396867   2.414686   2.795335   2.417580   1.390204
     7  H    1.083978   2.147226   3.398745   3.878421   3.396088
     8  H    2.155744   1.082694   2.141329   3.399737   3.872233
     9  H    3.400893   3.872227   3.400614   2.141920   1.082689
    10  H    2.154629   3.396491   3.879281   3.398727   2.147150
    11  C    4.279426   3.794684   2.521192   1.485180   2.485052
    12  O    5.017530   4.790517   3.633109   2.367527   2.810778
    13  C    3.769510   2.486456   1.486539   2.522613   3.796783
    14  C    5.153815   4.301584   2.904636   2.543163   3.821182
    15  C    4.959972   3.819371   2.542223   2.906686   4.303895
    16  C    6.515378   5.697413   4.300407   3.814980   4.965168
    17  C    6.215099   4.972776   3.821011   4.303875   5.701107
    18  C    7.491724   6.502155   5.137189   4.944218   6.198469
    19  H    6.926437   6.287137   4.909500   4.137510   5.068188
    20  C    7.381407   6.216580   4.963661   5.159549   6.524875
    21  H    6.419769   5.081733   4.148336   4.917280   6.295869
    22  H    8.338990   7.119648   5.927910   6.215718   7.590334
    23  Br   9.316916   8.384937   7.005640   6.666391   7.817440
    24  O    4.199251   2.809651   2.367438   3.633858   4.791354
                    6          7          8          9         10
     6  C    0.000000
     7  H    2.154564   0.000000
     8  H    3.401355   2.485107   0.000000
     9  H    2.155375   4.297897   4.954807   0.000000
    10  H    1.083946   2.482206   4.298352   2.484811   0.000000
    11  C    3.767797   5.363376   4.659880   2.665880   4.631298
    12  O    4.200136   6.080178   5.736914   2.486615   4.855848
    13  C    4.281684   4.632795   2.666545   4.661946   5.365601
    14  C    4.960735   6.209962   4.909763   4.144235   5.923880
    15  C    5.154926   5.922593   4.141002   4.913107   6.211299
    16  C    6.208199   7.581451   6.288458   5.067237   7.108584
    17  C    6.520847   7.116110   5.075965   6.290742   7.586654
    18  C    7.361782   8.522038   6.913454   6.398825   8.318287
    19  H    6.406689   8.009361   6.996740   4.936524   7.199611
    20  C    7.513548   8.337081   6.414190   6.936763   8.544177
    21  H    6.937710   7.213617   4.951482   7.003780   8.020526
    22  H    8.544420   9.259685   7.210870   8.018369   9.586619
    23  Br   9.066538  10.365729   8.823292   7.843387   9.963301
    24  O    5.017698   4.854323   2.484248   5.738094   6.080178
                   11         12         13         14         15
    11  C    0.000000
    12  O    1.223212   0.000000
    13  C    2.949746   4.172942   0.000000
    14  C    1.490676   2.365504   2.519844   0.000000
    15  C    2.523992   3.630553   1.486593   1.404879   0.000000
    16  C    2.482501   2.794086   3.796928   1.395977   2.427142
    17  C    3.797040   4.784750   2.488995   2.420150   1.397226
    18  C    3.757076   4.180344   4.264837   2.401057   2.778398
    19  H    2.664231   2.469142   4.661797   2.144098   3.402670
    20  C    4.288604   5.016488   3.772695   2.798144   2.421439
    21  H    4.664888   5.734628   2.674364   3.397410   2.143772
    22  H    5.370977   6.076247   4.638786   3.880582   3.403733
    23  Br   5.332388   5.424969   6.176352   4.165420   4.689961
    24  O    4.173908   5.397098   1.224163   3.628468   2.363587
                   16         17         18         19         20
    16  C    0.000000
    17  C    2.792835   0.000000
    18  C    1.387535   2.398300   0.000000
    19  H    1.081605   3.874394   2.159139   0.000000
    20  C    2.428129   1.388513   1.395523   3.413392   0.000000
    21  H    3.875386   1.082586   3.384530   4.956913   2.147157
    22  H    3.406818   2.150619   2.157454   4.307076   1.082454
    23  Br   2.859003   4.161642   1.911567   2.981583   2.864698
    24  O    4.789500   2.807128   4.997058   5.736110   4.195058
                   21         22         23         24
    21  H    0.000000
    22  H    2.481701   0.000000
    23  Br   5.011822   2.971549   0.000000
    24  O    2.487306   4.854208   6.874694   0.000000
 Stoichiometry    C14H7BrO2
 Framework group  C1[X(C14H7BrO2)]
 Deg. of freedom    66
 Full point group                 C1      NOp   1
 RotChk:  IX=2 Diff= 7.78D-17
 Largest Abelian subgroup         C1      NOp   1
 Largest concise Abelian subgroup C1      NOp   1
                         Standard orientation:                         
 ---------------------------------------------------------------------
 Center     Atomic      Atomic             Coordinates (Angstroms)
 Number     Number       Type             X           Y           Z
 ---------------------------------------------------------------------
      1          6           0       -5.088092    0.054699    0.000006
      2          6           0       -4.052824    0.982846   -0.000028
      3          6           0       -2.722773    0.555482   -0.000138
      4          6           0       -2.434870   -0.822412   -0.000168
      5          6           0       -3.481869   -1.747703   -0.000154
      6          6           0       -4.802232   -1.312606   -0.000066
      7          1           0       -6.117669    0.393785    0.000080
      8          1           0       -4.260791    2.045378    0.000000
      9          1           0       -3.246666   -2.804535   -0.000186
     10          1           0       -5.609594   -2.035866   -0.000043
     11          6           0       -1.034438   -1.316931   -0.000153
     12          8           0       -0.777224   -2.512795   -0.000411
     13          6           0       -1.636845    1.570647   -0.000294
     14          6           0        0.053639   -0.298009   -0.000116
     15          6           0       -0.234613    1.076981   -0.000089
     16          6           0        1.379131   -0.735985   -0.000051
     17          6           0        0.814965    1.999274    0.000066
     18          6           0        2.402196    0.201347    0.000080
     19          1           0        1.586073   -1.797609   -0.000080
     20          6           0        2.135850    1.571217    0.000151
     21          1           0        0.586164    3.057406    0.000091
     22          1           0        2.945958    2.289153    0.000261
     23         35           0        4.217896   -0.396415    0.000193
     24          8           0       -1.884424    2.769513    0.000267
 ---------------------------------------------------------------------
 Rotational constants (GHZ):      1.0090756      0.1765797      0.1502817
 Leave Link  202 at Wed Jan 08 22:13:57 2020, MaxMem=   134217728 cpu:         0.0
 (Enter E:\Gaussian\G09W\l601.exe)
 Copying SCF densities to generalized density rwf, IOpCl= 0 IROHF=0.

 **********************************************************************

            Population analysis using the SCF density.

 **********************************************************************

 Orbital symmetries:
       Occupied  (A) (A) (A) (A) (A) (A) (A) (A) (A) (A) (A) (A)
                 (A) (A) (A) (A) (A) (A) (A) (A) (A) (A) (A) (A)
                 (A) (A) (A) (A) (A) (A) (A) (A) (A) (A) (A) (A)
                 (A) (A) (A) (A) (A) (A) (A) (A) (A) (A) (A) (A)
                 (A) (A) (A) (A) (A) (A) (A) (A) (A) (A) (A) (A)
                 (A) (A) (A) (A) (A) (A) (A) (A) (A) (A) (A)
       Virtual   (A) (A) (A) (A) (A) (A) (A) (A) (A) (A) (A) (A)
                 (A) (A) (A) (A) (A) (A) (A) (A) (A) (A) (A) (A)
                 (A) (A) (A) (A) (A) (A) (A) (A) (A) (A) (A) (A)
                 (A) (A) (A) (A) (A) (A) (A) (A) (A) (A) (A) (A)
                 (A) (A) (A) (A) (A) (A) (A) (A) (A) (A) (A) (A)
                 (A) (A) (A) (A) (A) (A) (A) (A) (A) (A) (A) (A)
                 (A) (A) (A) (A) (A) (A) (A) (A) (A) (A) (A) (A)
                 (A) (A) (A) (A) (A) (A) (A) (A) (A) (A) (A) (A)
                 (A) (A) (A) (A) (A) (A) (A) (A) (A) (A) (A) (A)
                 (A) (A) (A) (A) (A) (A) (A) (A) (A) (A) (A) (A)
                 (A) (A) (A) (A) (A) (A) (A) (A) (A) (A) (A) (A)
                 (A) (A) (A) (A) (A) (A) (A) (A) (A) (A) (A) (A)
                 (A) (A) (A) (A) (A) (A) (A) (A) (A) (A) (A) (A)
                 (A) (A) (A) (A) (A) (A) (A) (A) (A) (A) (A) (A)
                 (A) (A) (A) (A) (A) (A) (A) (A) (A) (A) (A) (A)
                 (A) (A) (A) (A) (A) (A) (A) (A) (A) (A) (A) (A)
                 (A) (A) (A) (A) (A) (A) (A) (A) (A) (A) (A) (A)
                 (A) (A) (A) (A) (A) (A) (A) (A) (A) (A) (A) (A)
                 (A) (A) (A) (A) (A) (A) (A) (A) (A) (A) (A) (A)
                 (A) (A) (A) (A) (A) (A) (A) (A) (A) (A) (A) (A)
                 (A) (A) (A) (A) (A) (A) (A) (A) (A) (A) (A) (A)
                 (A) (A) (A) (A) (A) (A) (A) (A) (A) (A) (A) (A)
                 (A) (A) (A) (A) (A) (A) (A) (A) (A) (A) (A) (A)
                 (A) (A) (A) (A) (A) (A) (A) (A) (A) (A) (A) (A)
                 (A) (A) (A) (A) (A) (A) (A) (A) (A) (A) (A) (A)
                 (A) (A) (A) (A) (A) (A) (A) (A) (A) (A) (A) (A)
                 (A) (A) (A) (A) (A) (A) (A) (A) (A) (A) (A) (A)
                 (A) (A) (A) (A) (A) (A) (A) (A) (A) (A) (A) (A)
                 (A) (A) (A) (A) (A) (A) (A) (A)
 The electronic state is 1-A.
 Alpha  occ. eigenvalues -- -482.84673 -62.49957 -56.31993 -56.31610 -56.31589
 Alpha  occ. eigenvalues --  -19.13679 -19.13505 -10.28916 -10.28756 -10.25898
 Alpha  occ. eigenvalues --  -10.21974 -10.21609 -10.21293 -10.21265 -10.21241
 Alpha  occ. eigenvalues --  -10.21202 -10.20875 -10.20196 -10.20159 -10.20113
 Alpha  occ. eigenvalues --  -10.20095  -8.70926  -6.54069  -6.52790  -6.52732
 Alpha  occ. eigenvalues --   -2.65163  -2.64802  -2.64761  -2.63744  -2.63743
 Alpha  occ. eigenvalues --   -1.07059  -1.06782  -0.90971  -0.89205  -0.84195
 Alpha  occ. eigenvalues --   -0.80602  -0.78817  -0.78298  -0.75974  -0.69668
 Alpha  occ. eigenvalues --   -0.67367  -0.64643  -0.62663  -0.59424  -0.56917
 Alpha  occ. eigenvalues --   -0.55757  -0.51420  -0.49935  -0.49547  -0.48198
 Alpha  occ. eigenvalues --   -0.46522  -0.46302  -0.46206  -0.45535  -0.45128
 Alpha  occ. eigenvalues --   -0.44506  -0.42408  -0.40901  -0.40411  -0.38751
 Alpha  occ. eigenvalues --   -0.38234  -0.38027  -0.37230  -0.33444  -0.30942
 Alpha  occ. eigenvalues --   -0.29359  -0.29355  -0.28635  -0.28180  -0.28130
 Alpha  occ. eigenvalues --   -0.27004
 Alpha virt. eigenvalues --   -0.12491  -0.08121  -0.04414  -0.03341  -0.02659
 Alpha virt. eigenvalues --   -0.00172   0.00893   0.01895   0.02328   0.02500
 Alpha virt. eigenvalues --    0.03008   0.03097   0.04032   0.04411   0.04980
 Alpha virt. eigenvalues --    0.05229   0.05340   0.05686   0.06271   0.07448
 Alpha virt. eigenvalues --    0.07488   0.07967   0.08768   0.09052   0.09298
 Alpha virt. eigenvalues --    0.10326   0.10786   0.11482   0.11715   0.12281
 Alpha virt. eigenvalues --    0.12679   0.12942   0.13557   0.14200   0.14395
 Alpha virt. eigenvalues --    0.14768   0.15721   0.16331   0.16654   0.16772
 Alpha virt. eigenvalues --    0.17364   0.17481   0.17858   0.18018   0.18357
 Alpha virt. eigenvalues --    0.19023   0.19133   0.19315   0.19594   0.19868
 Alpha virt. eigenvalues --    0.19878   0.20298   0.21263   0.21478   0.22252
 Alpha virt. eigenvalues --    0.22551   0.23097   0.23632   0.23879   0.24067
 Alpha virt. eigenvalues --    0.24659   0.25274   0.25367   0.25622   0.26097
 Alpha virt. eigenvalues --    0.26782   0.27385   0.27511   0.28536   0.29094
 Alpha virt. eigenvalues --    0.29421   0.29923   0.30011   0.30338   0.30712
 Alpha virt. eigenvalues --    0.31234   0.32169   0.32679   0.33028   0.33516
 Alpha virt. eigenvalues --    0.34264   0.34890   0.35552   0.36167   0.36633
 Alpha virt. eigenvalues --    0.37867   0.39239   0.40250   0.41078   0.42934
 Alpha virt. eigenvalues --    0.44286   0.44752   0.46184   0.46746   0.48783
 Alpha virt. eigenvalues --    0.49683   0.50849   0.51757   0.51903   0.52580
 Alpha virt. eigenvalues --    0.52899   0.53390   0.53547   0.54581   0.55307
 Alpha virt. eigenvalues --    0.55403   0.57911   0.58618   0.58833   0.58871
 Alpha virt. eigenvalues --    0.59677   0.61039   0.61209   0.62007   0.62312
 Alpha virt. eigenvalues --    0.63070   0.63226   0.63568   0.63636   0.65180
 Alpha virt. eigenvalues --    0.65485   0.66312   0.66561   0.67685   0.68721
 Alpha virt. eigenvalues --    0.69656   0.70364   0.70432   0.71551   0.72102
 Alpha virt. eigenvalues --    0.72485   0.74412   0.74828   0.75509   0.76838
 Alpha virt. eigenvalues --    0.77230   0.78406   0.79691   0.82356   0.83554
 Alpha virt. eigenvalues --    0.84283   0.84919   0.85932   0.87097   0.88230
 Alpha virt. eigenvalues --    0.89647   0.90621   0.91401   0.91866   0.91977
 Alpha virt. eigenvalues --    0.93086   0.93286   0.94769   0.95364   0.96627
 Alpha virt. eigenvalues --    0.96650   0.98600   0.99149   0.99296   1.01806
 Alpha virt. eigenvalues --    1.03268   1.05795   1.06246   1.08640   1.09214
 Alpha virt. eigenvalues --    1.10060   1.10386   1.12946   1.13936   1.14555
 Alpha virt. eigenvalues --    1.16949   1.17647   1.18602   1.18882   1.18937
 Alpha virt. eigenvalues --    1.19249   1.21341   1.21835   1.23234   1.25186
 Alpha virt. eigenvalues --    1.26497   1.30693   1.31918   1.33531   1.34211
 Alpha virt. eigenvalues --    1.34572   1.40144   1.44413   1.47486   1.48105
 Alpha virt. eigenvalues --    1.48770   1.50234   1.51321   1.51351   1.53372
 Alpha virt. eigenvalues --    1.55055   1.55752   1.58911   1.62436   1.66137
 Alpha virt. eigenvalues --    1.69164   1.69819   1.73348   1.74273   1.76829
 Alpha virt. eigenvalues --    1.78156   1.79621   1.81634   1.82141   1.83725
 Alpha virt. eigenvalues --    1.83937   1.85449   1.87759   1.89600   1.89782
 Alpha virt. eigenvalues --    1.90004   1.90513   1.90929   1.91341   1.92392
 Alpha virt. eigenvalues --    1.93165   1.96284   1.97534   1.99771   2.01821
 Alpha virt. eigenvalues --    2.02798   2.03083   2.07428   2.08617   2.14835
 Alpha virt. eigenvalues --    2.15526   2.22559   2.23612   2.25617   2.27320
 Alpha virt. eigenvalues --    2.29982   2.31736   2.32214   2.33113   2.34860
 Alpha virt. eigenvalues --    2.35264   2.37518   2.39335   2.42159   2.42254
 Alpha virt. eigenvalues --    2.49241   2.54470   2.56716   2.58573   2.58860
 Alpha virt. eigenvalues --    2.61854   2.65264   2.68558   2.71144   2.74227
 Alpha virt. eigenvalues --    2.74316   2.75176   2.79419   2.80887   2.82539
 Alpha virt. eigenvalues --    2.83994   2.84053   2.84612   2.85591   2.89388
 Alpha virt. eigenvalues --    2.91117   2.92659   2.95214   2.99277   2.99725
 Alpha virt. eigenvalues --    3.05595   3.05798   3.06496   3.14540   3.16116
 Alpha virt. eigenvalues --    3.17913   3.19737   3.21357   3.24651   3.27441
 Alpha virt. eigenvalues --    3.29350   3.31598   3.31720   3.31967   3.32892
 Alpha virt. eigenvalues --    3.34447   3.37060   3.39795   3.45104   3.48843
 Alpha virt. eigenvalues --    3.49539   3.51540   3.57041   3.60417   3.61373
 Alpha virt. eigenvalues --    3.65674   3.70358   3.80106   3.84663   3.93055
 Alpha virt. eigenvalues --    3.98273   4.02223   4.12691   4.17404   4.18160
 Alpha virt. eigenvalues --    4.20235   4.21867   4.37434   4.37528   4.55287
 Alpha virt. eigenvalues --    4.72992   4.77623   4.78362   5.03362   5.04700
 Alpha virt. eigenvalues --    5.21972   5.24585   5.69714   5.77872   6.74134
 Alpha virt. eigenvalues --    7.54363   7.67142   7.73674  23.29034  23.42911
 Alpha virt. eigenvalues --   23.83735  23.85028  23.85586  23.85974  23.88936
 Alpha virt. eigenvalues --   23.91531  24.00059  24.02569  24.03015  24.03976
 Alpha virt. eigenvalues --   24.10983  24.12218  47.99714  50.01796  50.06770
 Alpha virt. eigenvalues --  289.74129 289.86947 289.959611020.80616
          Condensed to atoms (all electrons):
               1          2          3          4          5          6
     1  C    6.462126   0.147276  -0.664653   0.096348  -0.360852   0.683873
     2  C    0.147276   9.008995  -1.160305  -0.127757   1.050067  -0.478728
     3  C   -0.664653  -1.160305  14.312295  -3.205988   0.095328   0.135717
     4  C    0.096348  -0.127757  -3.205988  15.011282  -0.562970  -0.615630
     5  C   -0.360852   1.050067   0.095328  -0.562970   8.348685   0.252271
     6  C    0.683873  -0.478728   0.135717  -0.615630   0.252271   6.470123
     7  H    0.347684  -0.062382   0.028288   0.013344  -0.014432   0.020409
     8  H   -0.005069   0.301459  -0.073863   0.030569  -0.017366  -0.017399
     9  H   -0.015912  -0.011435   0.011122  -0.084175   0.291549  -0.001197
    10  H    0.021108  -0.012350   0.025661   0.011848  -0.063020   0.352445
    11  C   -0.130360  -0.384579  -0.121228   0.206382  -1.696918   0.045090
    12  O   -0.002030  -0.002946  -0.300841  -0.089095   0.092946   0.050470
    13  C    0.189819  -1.917351   0.767736   0.456566  -0.743124  -0.004176
    14  C   -0.141799  -0.735256  -3.865465   0.954491   0.010348   0.018178
    15  C   -0.025031   0.290993   1.062805  -5.085257  -0.599689  -0.216933
    16  C   -0.050926   0.030407  -0.817793  -0.320500  -0.146854  -0.058381
    17  C   -0.069308  -0.082010  -0.307291  -0.922727   0.063137  -0.062642
    18  C   -0.004763  -0.035713  -0.128977   0.210028  -0.081466   0.001186
    19  H    0.000225  -0.000308   0.007140   0.032204   0.007512   0.000615
    20  C    0.000325  -0.078748   0.120593   0.071151  -0.069632  -0.001465
    21  H    0.000803   0.005161   0.016542   0.007175  -0.000454   0.000126
    22  H   -0.000016  -0.000152   0.000710   0.001517   0.000216   0.000009
    23  Br  -0.000166   0.000743  -0.003347  -0.020005  -0.003317  -0.000493
    24  O    0.050938   0.112254  -0.161146  -0.288135  -0.001674  -0.006079
               7          8          9         10         11         12
     1  C    0.347684  -0.005069  -0.015912   0.021108  -0.130360  -0.002030
     2  C   -0.062382   0.301459  -0.011435  -0.012350  -0.384579  -0.002946
     3  C    0.028288  -0.073863   0.011122   0.025661  -0.121228  -0.300841
     4  C    0.013344   0.030569  -0.084175   0.011848   0.206382  -0.089095
     5  C   -0.014432  -0.017366   0.291549  -0.063020  -1.696918   0.092946
     6  C    0.020409  -0.017399  -0.001197   0.352445   0.045090   0.050470
     7  H    0.424070  -0.004668  -0.000229  -0.005185   0.001701   0.000007
     8  H   -0.004668   0.415331   0.000073  -0.000220   0.007113   0.000005
     9  H   -0.000229   0.000073   0.415676  -0.004705   0.080415   0.008509
    10  H   -0.005185  -0.000220  -0.004705   0.423943  -0.012447   0.000028
    11  C    0.001701   0.007113   0.080415  -0.012447   9.251435   0.625379
    12  O    0.000007   0.000005   0.008509   0.000028   0.625379   8.224658
    13  C   -0.007520   0.061013   0.005474   0.003655   1.019728  -0.019493
    14  C    0.000992   0.005149   0.024363  -0.000299   0.057814  -0.173867
    15  C   -0.000593   0.016744   0.009456   0.000866  -0.155317  -0.312318
    16  C    0.000198  -0.000085   0.004685  -0.000415  -2.236833   0.060158
    17  C   -0.000463   0.006285   0.000130   0.000139  -0.606793  -0.009935
    18  C    0.000017   0.000038  -0.000081  -0.000008   0.241227   0.094733
    19  H    0.000000   0.000000  -0.000014   0.000000   0.117482   0.011327
    20  C   -0.000018   0.000289  -0.000174   0.000007   0.293622   0.009718
    21  H    0.000000  -0.000013   0.000000   0.000000   0.011202   0.000007
    22  H    0.000000   0.000000   0.000000   0.000000   0.002943   0.000007
    23  Br   0.000000   0.000001   0.000005   0.000000  -0.070022   0.001083
    24  O    0.000025   0.008318   0.000011   0.000005  -0.016701  -0.000076
              13         14         15         16         17         18
     1  C    0.189819  -0.141799  -0.025031  -0.050926  -0.069308  -0.004763
     2  C   -1.917351  -0.735256   0.290993   0.030407  -0.082010  -0.035713
     3  C    0.767736  -3.865465   1.062805  -0.817793  -0.307291  -0.128977
     4  C    0.456566   0.954491  -5.085257  -0.320500  -0.922727   0.210028
     5  C   -0.743124   0.010348  -0.599689  -0.146854   0.063137  -0.081466
     6  C   -0.004176   0.018178  -0.216933  -0.058381  -0.062642   0.001186
     7  H   -0.007520   0.000992  -0.000593   0.000198  -0.000463   0.000017
     8  H    0.061013   0.005149   0.016744  -0.000085   0.006285   0.000038
     9  H    0.005474   0.024363   0.009456   0.004685   0.000130  -0.000081
    10  H    0.003655  -0.000299   0.000866  -0.000415   0.000139  -0.000008
    11  C    1.019728   0.057814  -0.155317  -2.236833  -0.606793   0.241227
    12  O   -0.019493  -0.173867  -0.312318   0.060158  -0.009935   0.094733
    13  C    8.593515   0.321349  -0.183063  -0.902086  -2.058196  -0.120125
    14  C    0.321349  14.702900  -3.836998   0.174219   0.511001  -1.999465
    15  C   -0.183063  -3.836998  15.644238   0.943955  -0.094460  -0.077240
    16  C   -0.902086   0.174219   0.943955   9.653748   0.699824   0.326248
    17  C   -2.058196   0.511001  -0.094460   0.699824   8.710689  -0.345273
    18  C   -0.120125  -1.999465  -0.077240   0.326248  -0.345273   7.490630
    19  H    0.012122  -0.030948  -0.014421   0.248164  -0.018003  -0.046544
    20  C    0.369147  -0.028781  -1.740784  -1.685784   0.157804   0.619878
    21  H    0.091257   0.048579  -0.094858  -0.030282   0.279521  -0.037174
    22  H   -0.004503   0.021484   0.025334   0.007630  -0.002047  -0.030487
    23  Br  -0.007139  -0.016159   0.073254   0.112981   0.059278  -0.016262
    24  O    0.559124  -0.274180  -0.094248  -0.009623   0.088862  -0.003895
              19         20         21         22         23         24
     1  C    0.000225   0.000325   0.000803  -0.000016  -0.000166   0.050938
     2  C   -0.000308  -0.078748   0.005161  -0.000152   0.000743   0.112254
     3  C    0.007140   0.120593   0.016542   0.000710  -0.003347  -0.161146
     4  C    0.032204   0.071151   0.007175   0.001517  -0.020005  -0.288135
     5  C    0.007512  -0.069632  -0.000454   0.000216  -0.003317  -0.001674
     6  C    0.000615  -0.001465   0.000126   0.000009  -0.000493  -0.006079
     7  H    0.000000  -0.000018   0.000000   0.000000   0.000000   0.000025
     8  H    0.000000   0.000289  -0.000013   0.000000   0.000001   0.008318
     9  H   -0.000014  -0.000174   0.000000   0.000000   0.000005   0.000011
    10  H    0.000000   0.000007   0.000000   0.000000   0.000000   0.000005
    11  C    0.117482   0.293622   0.011202   0.002943  -0.070022  -0.016701
    12  O    0.011327   0.009718   0.000007   0.000007   0.001083  -0.000076
    13  C    0.012122   0.369147   0.091257  -0.004503  -0.007139   0.559124
    14  C   -0.030948  -0.028781   0.048579   0.021484  -0.016159  -0.274180
    15  C   -0.014421  -1.740784  -0.094858   0.025334   0.073254  -0.094248
    16  C    0.248164  -1.685784  -0.030282   0.007630   0.112981  -0.009623
    17  C   -0.018003   0.157804   0.279521  -0.002047   0.059278   0.088862
    18  C   -0.046544   0.619878  -0.037174  -0.030487  -0.016262  -0.003895
    19  H    0.399642   0.000420   0.000063  -0.000137  -0.012141  -0.000001
    20  C    0.000420   8.007011   0.017403   0.307799   0.052981   0.068345
    21  H    0.000063   0.017403   0.407774  -0.004535   0.000199   0.008239
    22  H   -0.000137   0.307799  -0.004535   0.406458  -0.010112   0.000050
    23  Br  -0.012141   0.052981   0.000199  -0.010112  34.997731  -0.000024
    24  O   -0.000001   0.068345   0.008239   0.000050  -0.000024   8.234951
 Mulliken charges:
               1
     1  C   -0.529639
     2  C    0.142665
     3  C    0.226960
     4  C    0.219335
     5  C    0.149706
     6  C   -0.567388
     7  H    0.258754
     8  H    0.266296
     9  H    0.266454
    10  H    0.258945
    11  C   -0.530333
    12  O   -0.268434
    13  C   -0.483729
    14  C    0.252350
    15  C    0.463567
    16  C   -0.002656
    17  C    0.002479
    18  C   -0.056512
    19  H    0.285602
    20  C   -0.491107
    21  H    0.273266
    22  H    0.277831
    23  Br  -0.139071
    24  O   -0.275342
 Sum of Mulliken charges =   0.00000
 Mulliken charges with hydrogens summed into heavy atoms:
               1
     1  C   -0.270885
     2  C    0.408961
     3  C    0.226960
     4  C    0.219335
     5  C    0.416160
     6  C   -0.308442
    11  C   -0.530333
    12  O   -0.268434
    13  C   -0.483729
    14  C    0.252350
    15  C    0.463567
    16  C    0.282946
    17  C    0.275746
    18  C   -0.056512
    20  C   -0.213277
    23  Br  -0.139071
    24  O   -0.275342
 Electronic spatial extent (au):  <R**2>=           6224.7366
 Charge=              0.0000 electrons
 Dipole moment (field-independent basis, Debye):
    X=             -2.2496    Y=              0.4938    Z=             -0.0002  Tot=              2.3032
 Quadrupole moment (field-independent basis, Debye-Ang):
   XX=            -85.3621   YY=           -118.8628   ZZ=           -112.1342
   XY=             10.5906   XZ=              0.0013   YZ=             -0.0037
 Traceless Quadrupole moment (field-independent basis, Debye-Ang):
   XX=             20.0909   YY=            -13.4097   ZZ=             -6.6812
   XY=             10.5906   XZ=              0.0013   YZ=             -0.0037
 Octapole moment (field-independent basis, Debye-Ang**2):
  XXX=            -17.2496  YYY=            -15.0291  ZZZ=              0.0060  XYY=             64.4790
  XXY=            -24.8494  XXZ=              0.0031  XZZ=             49.8935  YZZ=             -4.3592
  YYZ=              0.0024  XYZ=              0.0061
 Hexadecapole moment (field-independent basis, Debye-Ang**3):
 XXXX=          -5052.0314 YYYY=          -1477.9968 ZZZZ=           -126.9726 XXXY=             29.3224
 XXXZ=             -0.0911 YYYX=             55.9920 YYYZ=             -0.0620 ZZZX=             -0.0926
 ZZZY=             -0.0382 XXYY=          -1144.2729 XXZZ=          -1095.7403 YYZZ=           -254.8095
 XXYZ=             -0.0150 YYXZ=             -0.0176 ZZXY=            -28.7883
 N-N= 1.372337952618D+03 E-N=-1.050034927533D+04  KE= 3.256664914794D+03
 No NMR shielding tensors so no spin-rotation constants.
 Leave Link  601 at Wed Jan 08 22:13:58 2020, MaxMem=   134217728 cpu:         1.0
 (Enter E:\Gaussian\G09W\l9999.exe)
 1|1|UNPC-DESKTOP-K4OTQA5|FOpt|RB3LYP|6-311+G(d)|C14H7Br1O2|������|08-J
 an-2020|0||#p opt b3lyp/6-311+g(d) scrf=(solvent=acetonitrile) guess=s
 ave geom=connectivity empiricaldispersion=gd3bj||2-BrAQ ground state o
 pt||0,1|C,-2.7962311822,0.7697536211,0.0000604431|C,-1.7610352374,1.69
 79814144,0.0000264634|C,-0.430950666,1.2707214435,-0.0000842821|C,-0.1
 429403652,-0.1071503365,-0.0001138223|C,-1.1898671772,-1.032522717,-0.
 0001002722|C,-2.5102637998,-0.5975283378,-0.0000117834|H,-3.8258348232
 ,1.1087596744,0.000133832|H,-1.9690851196,2.7604978171,0.0000545214|H,
 -0.9545811592,-2.0893365115,-0.0001315289|H,-3.3175696557,-1.320851907
 9,0.0000115342|C,1.2575305896,-0.6015599568,-0.0000988979|O,1.51483790
 09,-1.797403065,-0.0003565754|C,0.654897562,2.2859713413,-0.0002396106
 |C,2.3455276986,0.417447564,-0.0000618124|C,2.0571678893,1.7924147405,
 -0.0000343425|C,3.671053613,-0.0204253025,0.0000028401|C,3.106674304,2
 .714790182,0.0001206629|C,4.6940455019,0.9169872752,0.000134248|H,3.87
 80790425,-1.0820325252,-0.0000260117|C,4.4275924297,2.2868366143,0.000
 2053557|H,2.8777908859,3.7729041366,0.0001453988|H,5.2376444751,3.0048
 353183,0.0003148261|Br,6.5097923864,0.3193665166,0.0002471105|O,0.4072
 250265,3.4848182407,0.000320703||Version=IA32W-G09RevD.01|State=1-A|HF
 =-3262.5536214|RMSD=6.566e-009|RMSF=5.272e-005|Dipole=-0.8850861,0.194
 1987,-0.000087|Quadrupole=14.9358857,-9.9685706,-4.9673151,7.8758225,0
 .0009764,-0.0027145|PG=C01 [X(C14H7Br1O2)]||@


 THE RED LIGHT IS ALWAYS LONGER THAN THE GREEN LIGHT.

                     -- PETER'S THEORY OF RELATIVITY
 Job cpu time:       0 days  2 hours  3 minutes 46.0 seconds.
 File lengths (MBytes):  RWF=    185 Int=      0 D2E=      0 Chk=     15 Scr=      1
 Normal termination of Gaussian 09 at Wed Jan 08 22:13:59 2020.
