# Supplementary material for: 2-Bromoanthraquinone as a highly efficient photocatalyst for the oxidation of sec-aromatic alcohols: experimental and DFT study
Source: Royal Society of Chemistry journal article supplement (doi:10.1039/d0ra06414a), 2020-01-01
Supplement: d0ra06414a12.out [file d0ra06414a12.out]

 Entering Link 1 = E:\Gaussian\G09W\l1.exe PID=    165100.
  
 Copyright (c) 1988,1990,1992,1993,1995,1998,2003,2009,2013,
            Gaussian, Inc.  All Rights Reserved.
  
 This is part of the Gaussian(R) 09 program.  It is based on
 the Gaussian(R) 03 system (copyright 2003, Gaussian, Inc.),
 the Gaussian(R) 98 system (copyright 1998, Gaussian, Inc.),
 the Gaussian(R) 94 system (copyright 1995, Gaussian, Inc.),
 the Gaussian 92(TM) system (copyright 1992, Gaussian, Inc.),
 the Gaussian 90(TM) system (copyright 1990, Gaussian, Inc.),
 the Gaussian 88(TM) system (copyright 1988, Gaussian, Inc.),
 the Gaussian 86(TM) system (copyright 1986, Carnegie Mellon
 University), and the Gaussian 82(TM) system (copyright 1983,
 Carnegie Mellon University). Gaussian is a federally registered
 trademark of Gaussian, Inc.
  
 This software contains proprietary and confidential information,
 including trade secrets, belonging to Gaussian, Inc.
  
 This software is provided under written license and may be
 used, copied, transmitted, or stored only in accord with that
 written license.
  
 The following legend is applicable only to US Government
 contracts under FAR:
  
                    RESTRICTED RIGHTS LEGEND
  
 Use, reproduction and disclosure by the US Government is
 subject to restrictions as set forth in subparagraphs (a)
 and (c) of the Commercial Computer Software - Restricted
 Rights clause in FAR 52.227-19.
  
 Gaussian, Inc.
 340 Quinnipiac St., Bldg. 40, Wallingford CT 06492
  
  
 ---------------------------------------------------------------
 Warning -- This program may not be used in any manner that
 competes with the business of Gaussian, Inc. or will provide
 assistance to any competitor of Gaussian, Inc.  The licensee
 of this program is prohibited from giving any competitor of
 Gaussian, Inc. access to this program.  By using this program,
 the user acknowledges that Gaussian, Inc. is engaged in the
 business of creating and licensing software in the field of
 computational chemistry and represents and warrants to the
 licensee that it is not a competitor of Gaussian, Inc. and that
 it will not use this program in any manner prohibited above.
 ---------------------------------------------------------------
  

 Cite this work as:
 Gaussian 09, Revision D.01,
 M. J. Frisch, G. W. Trucks, H. B. Schlegel, G. E. Scuseria, 
 M. A. Robb, J. R. Cheeseman, G. Scalmani, V. Barone, B. Mennucci, 
 G. A. Petersson, H. Nakatsuji, M. Caricato, X. Li, H. P. Hratchian, 
 A. F. Izmaylov, J. Bloino, G. Zheng, J. L. Sonnenberg, M. Hada, 
 M. Ehara, K. Toyota, R. Fukuda, J. Hasegawa, M. Ishida, T. Nakajima, 
 Y. Honda, O. Kitao, H. Nakai, T. Vreven, J. A. Montgomery, Jr., 
 J. E. Peralta, F. Ogliaro, M. Bearpark, J. J. Heyd, E. Brothers, 
 K. N. Kudin, V. N. Staroverov, T. Keith, R. Kobayashi, J. Normand, 
 K. Raghavachari, A. Rendell, J. C. Burant, S. S. Iyengar, J. Tomasi, 
 M. Cossi, N. Rega, J. M. Millam, M. Klene, J. E. Knox, J. B. Cross, 
 V. Bakken, C. Adamo, J. Jaramillo, R. Gomperts, R. E. Stratmann, 
 O. Yazyev, A. J. Austin, R. Cammi, C. Pomelli, J. W. Ochterski, 
 R. L. Martin, K. Morokuma, V. G. Zakrzewski, G. A. Voth, 
 P. Salvador, J. J. Dannenberg, S. Dapprich, A. D. Daniels, 
 O. Farkas, J. B. Foresman, J. V. Ortiz, J. Cioslowski, 
 and D. J. Fox, Gaussian, Inc., Wallingford CT, 2013.
 
 ******************************************
 Gaussian 09:  IA32W-G09RevD.01 24-Apr-2013
                14-Jan-2020 
 ******************************************
 %nprocshared=2
 Will use up to    2 processors via shared memory.
 %mem=1400MB
 %chk=E:\Gaussian file\2-BrAQ excited singlet energy.chk
 ----------------------------------------------------------------------
 #p td=(singlets,nstates=3,root=1) m062x/gen scrf=(solvent=acetonitrile
 ) guess=save geom=connectivity empiricaldispersion=gd3
 ----------------------------------------------------------------------
 1/38=1,57=2/1;
 2/12=2,17=6,18=5,40=1/2;
 3/5=7,11=9,16=1,25=1,30=1,70=2201,72=2,74=-55,124=31/1,2,8,3;
 4//1;
 5/5=2,38=5,53=2/2;
 8/6=1,10=1,107=1,108=3/1;
 9/8=1,41=3,42=1,48=1,70=2/14;
 6/7=2,8=2,9=2,10=2/1;
 99/5=1,9=1/99;
 Leave Link    1 at Tue Jan 14 11:31:07 2020, MaxMem=   183500800 cpu:         0.0
 (Enter E:\Gaussian\G09W\l101.exe)
 -----------------------------
 2-BrAQ excited singlet energy
 -----------------------------
 Symbolic Z-matrix:
 Charge =  0 Multiplicity = 1
 C                     5.06551   0.07016   0.00001 
 C                     4.03899   0.9921   -0.00001 
 C                     2.6953    0.55636   0.00006 
 C                     2.40245  -0.82473   0.00014 
 C                     3.46679  -1.74159   0.00016 
 C                     4.77924  -1.30649   0.00009 
 H                     6.09457   0.41091  -0.00003 
 H                     4.24746   2.05563  -0.00007 
 H                     3.22164  -2.79708   0.00022 
 H                     5.58809  -2.02804   0.00011 
 C                     1.02541  -1.3331    0.00024 
 O                     0.76699  -2.54701   0.00012 
 C                     1.62396   1.53234   0.00002 
 C                    -0.03177  -0.31321   0.00009 
 C                     0.2557    1.06906   0.00001 
 C                    -1.37084  -0.73444   0.00005 
 C                    -0.80403   2.00443  -0.00011 
 C                    -2.38517   0.20055  -0.00006 
 H                    -1.57094  -1.79824   0.00012 
 C                    -2.11451   1.58066  -0.00014 
 H                    -0.57491   3.06367  -0.00018 
 H                    -2.92374   2.29926  -0.00023 
 Br                   -4.20512  -0.38756  -0.0001 
 O                     1.88488   2.77775  -0.00007 
 
 NAtoms=     24 NQM=       24 NQMF=       0 NMMI=      0 NMMIF=      0
                NMic=       0 NMicF=      0.
                    Isotopes and Nuclear Properties:
 (Nuclear quadrupole moments (NQMom) in fm**2, nuclear magnetic moments (NMagM)
  in nuclear magnetons)

  Atom         1           2           3           4           5           6           7           8           9          10
 IAtWgt=          12          12          12          12          12          12           1           1           1           1
 AtmWgt=  12.0000000  12.0000000  12.0000000  12.0000000  12.0000000  12.0000000   1.0078250   1.0078250   1.0078250   1.0078250
 NucSpn=           0           0           0           0           0           0           1           1           1           1
 AtZEff=   0.0000000   0.0000000   0.0000000   0.0000000   0.0000000   0.0000000   0.0000000   0.0000000   0.0000000   0.0000000
 NQMom=    0.0000000   0.0000000   0.0000000   0.0000000   0.0000000   0.0000000   0.0000000   0.0000000   0.0000000   0.0000000
 NMagM=    0.0000000   0.0000000   0.0000000   0.0000000   0.0000000   0.0000000   2.7928460   2.7928460   2.7928460   2.7928460
 AtZNuc=   6.0000000   6.0000000   6.0000000   6.0000000   6.0000000   6.0000000   1.0000000   1.0000000   1.0000000   1.0000000

  Atom        11          12          13          14          15          16          17          18          19          20
 IAtWgt=          12          16          12          12          12          12          12          12           1          12
 AtmWgt=  12.0000000  15.9949146  12.0000000  12.0000000  12.0000000  12.0000000  12.0000000  12.0000000   1.0078250  12.0000000
 NucSpn=           0           0           0           0           0           0           0           0           1           0
 AtZEff=   0.0000000   0.0000000   0.0000000   0.0000000   0.0000000   0.0000000   0.0000000   0.0000000   0.0000000   0.0000000
 NQMom=    0.0000000   0.0000000   0.0000000   0.0000000   0.0000000   0.0000000   0.0000000   0.0000000   0.0000000   0.0000000
 NMagM=    0.0000000   0.0000000   0.0000000   0.0000000   0.0000000   0.0000000   0.0000000   0.0000000   2.7928460   0.0000000
 AtZNuc=   6.0000000   8.0000000   6.0000000   6.0000000   6.0000000   6.0000000   6.0000000   6.0000000   1.0000000   6.0000000

  Atom        21          22          23          24
 IAtWgt=           1           1          79          16
 AtmWgt=   1.0078250   1.0078250  78.9183361  15.9949146
 NucSpn=           1           1           3           0
 AtZEff=   0.0000000   0.0000000   0.0000000   0.0000000
 NQMom=    0.0000000   0.0000000  31.3000000   0.0000000
 NMagM=    2.7928460   2.7928460   2.1063990   0.0000000
 AtZNuc=   1.0000000   1.0000000  35.0000000   8.0000000
 Leave Link  101 at Tue Jan 14 11:31:08 2020, MaxMem=   183500800 cpu:         0.0
 (Enter E:\Gaussian\G09W\l202.exe)
                          Input orientation:                          
 ---------------------------------------------------------------------
 Center     Atomic      Atomic             Coordinates (Angstroms)
 Number     Number       Type             X           Y           Z
 ---------------------------------------------------------------------
      1          6           0        5.065510    0.070160    0.000013
      2          6           0        4.038987    0.992097   -0.000006
      3          6           0        2.695300    0.556355    0.000059
      4          6           0        2.402449   -0.824727    0.000142
      5          6           0        3.466794   -1.741586    0.000157
      6          6           0        4.779243   -1.306492    0.000092
      7          1           0        6.094570    0.410908   -0.000034
      8          1           0        4.247459    2.055626   -0.000073
      9          1           0        3.221640   -2.797083    0.000224
     10          1           0        5.588088   -2.028037    0.000106
     11          6           0        1.025405   -1.333101    0.000238
     12          8           0        0.766987   -2.547012    0.000116
     13          6           0        1.623961    1.532342    0.000023
     14          6           0       -0.031770   -0.313209    0.000088
     15          6           0        0.255697    1.069062    0.000007
     16          6           0       -1.370837   -0.734440    0.000054
     17          6           0       -0.804033    2.004428   -0.000110
     18          6           0       -2.385174    0.200552   -0.000060
     19          1           0       -1.570940   -1.798242    0.000124
     20          6           0       -2.114511    1.580658   -0.000142
     21          1           0       -0.574913    3.063671   -0.000176
     22          1           0       -2.923741    2.299262   -0.000228
     23         35           0       -4.205120   -0.387560   -0.000104
     24          8           0        1.884878    2.777750   -0.000070
 ---------------------------------------------------------------------
                    Distance matrix (angstroms):
                    1          2          3          4          5
     1  C    0.000000
     2  C    1.379753   0.000000
     3  C    2.419562   1.412574   0.000000
     4  C    2.809398   2.445221   1.411789   0.000000
     5  C    2.416261   2.792925   2.423992   1.404799   0.000000
     6  C    1.406101   2.414848   2.795178   2.425128   1.382689
     7  H    1.084008   2.136165   3.402380   3.893398   3.396828
     8  H    2.147390   1.083769   2.158011   3.420599   3.876630
     9  H    3.408950   3.876331   3.394493   2.135711   1.083593
    10  H    2.162295   3.394249   3.879086   3.405327   2.140547
    11  C    4.276867   3.806340   2.521625   1.467888   2.475326
    12  O    5.032583   4.819883   3.653666   2.375079   2.817387
    13  C    3.739283   2.474715   1.449247   2.482301   3.756945
    14  C    5.111676   4.274914   2.862351   2.487383   3.778917
    15  C    4.912444   3.784073   2.492896   2.862688   4.267421
    16  C    6.486443   5.678655   4.266101   3.774366   4.941358
    17  C    6.180043   4.947692   3.787116   4.276172   5.680896
    18  C    7.451825   6.472742   5.092918   4.896175   6.165828
    19  H    6.894447   6.265562   4.872877   4.090911   5.038053
    20  C    7.337187   6.181581   4.917670   5.117500   6.495250
    21  H    6.385568   5.057617   4.120792   4.897379   6.279004
    22  H    8.294397   7.084367   5.883141   6.174756   7.560912
    23  Br   9.281923   8.358753   6.964680   6.622015   7.790485
    24  O    4.177016   2.797989   2.364610   3.639467   4.788200
                    6          7          8          9         10
     6  C    0.000000
     7  H    2.163226   0.000000
     8  H    3.403914   2.473240   0.000000
     9  H    2.155919   4.306383   4.959949   0.000000
    10  H    1.083908   2.490979   4.298091   2.488274   0.000000
    11  C    3.753932   5.360784   4.676014   2.639449   4.615302
    12  O    4.199653   6.093639   5.770439   2.467358   4.848953
    13  C    4.244383   4.609117   2.675176   4.614813   5.328283
    14  C    4.912480   6.168986   4.891133   4.093202   5.875665
    15  C    5.109376   5.875849   4.111870   4.872771   6.166556
    16  C    6.176628   7.552756   6.272935   5.034416   7.078137
    17  C    6.491160   7.080256   5.051751   6.265824   7.557776
    18  C    7.321206   8.482353   6.887171   6.357844   8.278860
    19  H    6.369195   7.977493   6.978973   4.895560   7.162715
    20  C    7.473920   8.292004   6.379675   6.902110   8.506040
    21  H    6.911245   7.177685   4.926604   6.982997   7.994252
    22  H    8.505141   9.213892   7.175337   7.983636   9.548652
    23  Br   9.031235  10.330594   8.798594   7.807853   9.929657
    24  O    5.005835   4.829436   2.470476   5.732861   6.067071
                   11         12         13         14         15
    11  C    0.000000
    12  O    1.241112   0.000000
    13  C    2.927291   4.168397   0.000000
    14  C    1.468945   2.372317   2.479416   0.000000
    15  C    2.522467   3.652042   1.444567   1.411846   0.000000
    16  C    2.469893   2.802804   3.755944   1.403758   2.428628
    17  C    3.806040   4.814947   2.473463   2.442915   1.413484
    18  C    3.739538   4.181534   4.224551   2.408830   2.780020
    19  H    2.637681   2.454905   4.615212   2.138777   3.399711
    20  C    4.283581   5.033954   3.738784   2.815056   2.424792
    21  H    4.678955   5.768922   2.679555   3.420281   2.160643
    22  H    5.365614   6.091621   4.611915   3.897243   3.409137
    23  Br   5.315302   5.420801   6.137117   4.174012   4.692615
    24  O    4.199737   5.440843   1.272446   3.636972   2.360899
                   16         17         18         19         20
    16  C    0.000000
    17  C    2.796903   0.000000
    18  C    1.379525   2.398745   0.000000
    19  H    1.082458   3.879233   2.158276   0.000000
    20  C    2.431611   1.377292   1.406396   3.422343   0.000000
    21  H    3.880611   1.083740   3.387402   4.962889   2.137683
    22  H    3.408058   2.140114   2.166711   4.315045   1.082241
    23  Br   2.855431   4.158004   1.912611   2.988131   2.871329
    24  O    4.789067   2.797904   4.987514   5.734316   4.174703
                   21         22         23         24
    21  H    0.000000
    22  H    2.470084   0.000000
    23  Br   5.008932   2.976734   0.000000
    24  O    2.476353   4.832367   6.863473   0.000000
 Stoichiometry    C14H7BrO2
 Framework group  C1[X(C14H7BrO2)]
 Deg. of freedom    66
 Full point group                 C1      NOp   1
 Largest Abelian subgroup         C1      NOp   1
 Largest concise Abelian subgroup C1      NOp   1
                         Standard orientation:                         
 ---------------------------------------------------------------------
 Center     Atomic      Atomic             Coordinates (Angstroms)
 Number     Number       Type             X           Y           Z
 ---------------------------------------------------------------------
      1          6           0        5.065510    0.070160    0.000013
      2          6           0        4.038987    0.992097   -0.000006
      3          6           0        2.695300    0.556355    0.000059
      4          6           0        2.402449   -0.824727    0.000142
      5          6           0        3.466794   -1.741586    0.000157
      6          6           0        4.779243   -1.306492    0.000092
      7          1           0        6.094570    0.410908   -0.000034
      8          1           0        4.247459    2.055626   -0.000073
      9          1           0        3.221640   -2.797083    0.000224
     10          1           0        5.588088   -2.028037    0.000106
     11          6           0        1.025405   -1.333101    0.000238
     12          8           0        0.766987   -2.547012    0.000116
     13          6           0        1.623961    1.532342    0.000023
     14          6           0       -0.031770   -0.313209    0.000088
     15          6           0        0.255697    1.069062    0.000007
     16          6           0       -1.370837   -0.734440    0.000054
     17          6           0       -0.804033    2.004428   -0.000110
     18          6           0       -2.385174    0.200552   -0.000060
     19          1           0       -1.570940   -1.798242    0.000124
     20          6           0       -2.114511    1.580658   -0.000142
     21          1           0       -0.574913    3.063671   -0.000176
     22          1           0       -2.923741    2.299262   -0.000228
     23         35           0       -4.205120   -0.387560   -0.000104
     24          8           0        1.884878    2.777750   -0.000070
 ---------------------------------------------------------------------
 Rotational constants (GHZ):      1.0041514      0.1781054      0.1512741
 Leave Link  202 at Tue Jan 14 11:31:08 2020, MaxMem=   183500800 cpu:         0.0
 (Enter E:\Gaussian\G09W\l301.exe)
 General basis read from cards:  (5D, 7F)
 Centers:       7      8      9     10     19     21     22
 S 3 1.00
     Exponent=  3.4061341000D+01 Coefficients=  6.0251978000D-03
     Exponent=  5.1235746000D+00 Coefficients=  4.5021094000D-02
     Exponent=  1.1646626000D+00 Coefficients=  2.0189726000D-01
 S 1 1.00
     Exponent=  3.2723041000D-01 Coefficients=  1.0000000000D+00
 S 1 1.00
     Exponent=  1.0307241000D-01 Coefficients=  1.0000000000D+00
 P 1 1.00
     Exponent=  8.0000000000D-01 Coefficients=  1.0000000000D+00
 ****
 Centers:       1      2      3      4      5      6     11     13     14     15
 Centers:      16     17     18     20
 S 6 1.00
     Exponent=  1.3575349682D+04 Coefficients=  2.2245814352D-04
     Exponent=  2.0352333680D+03 Coefficients=  1.7232738252D-03
     Exponent=  4.6322562359D+02 Coefficients=  8.9255715314D-03
     Exponent=  1.3120019598D+02 Coefficients=  3.5727984502D-02
     Exponent=  4.2853015891D+01 Coefficients=  1.1076259931D-01
     Exponent=  1.5584185766D+01 Coefficients=  2.4295627626D-01
 S 2 1.00
     Exponent=  6.2067138508D+00 Coefficients=  4.1440263448D-01
     Exponent=  2.5764896527D+00 Coefficients=  2.3744968655D-01
 S 1 1.00
     Exponent=  5.7696339419D-01 Coefficients=  1.0000000000D+00
 S 1 1.00
     Exponent=  2.2972831358D-01 Coefficients=  1.0000000000D+00
 S 1 1.00
     Exponent=  9.5164440028D-02 Coefficients=  1.0000000000D+00
 P 4 1.00
     Exponent=  3.4697232244D+01 Coefficients=  5.3333657805D-03
     Exponent=  7.9582622826D+00 Coefficients=  3.5864109092D-02
     Exponent=  2.3780826883D+00 Coefficients=  1.4215873329D-01
     Exponent=  8.1433208183D-01 Coefficients=  3.4270471845D-01
 P 1 1.00
     Exponent=  2.8887547253D-01 Coefficients=  4.6445822433D-01
 P 1 1.00
     Exponent=  1.0056823671D-01 Coefficients=  2.4955789874D-01
 D 1 1.00
     Exponent=  1.0970000000D+00 Coefficients=  1.0000000000D+00
 D 1 1.00
     Exponent=  3.1800000000D-01 Coefficients=  1.0000000000D+00
 F 1 1.00
     Exponent=  7.6100000000D-01 Coefficients=  1.0000000000D+00
 ****
 Centers:      12     24
 S 6 1.00
     Exponent=  2.7032382631D+04 Coefficients=  2.1726302465D-04
     Exponent=  4.0523871392D+03 Coefficients=  1.6838662199D-03
     Exponent=  9.2232722710D+02 Coefficients=  8.7395616265D-03
     Exponent=  2.6124070989D+02 Coefficients=  3.5239968808D-02
     Exponent=  8.5354641351D+01 Coefficients=  1.1153519115D-01
     Exponent=  3.1035035245D+01 Coefficients=  2.5588953961D-01
 S 2 1.00
     Exponent=  1.2260860728D+01 Coefficients=  3.9768730901D-01
     Exponent=  4.9987076005D+00 Coefficients=  2.4627849430D-01
 S 1 1.00
     Exponent=  1.1703108158D+00 Coefficients=  1.0000000000D+00
 S 1 1.00
     Exponent=  4.6474740994D-01 Coefficients=  1.0000000000D+00
 S 1 1.00
     Exponent=  1.8504536357D-01 Coefficients=  1.0000000000D+00
 P 4 1.00
     Exponent=  6.3274954801D+01 Coefficients=  6.0685103418D-03
     Exponent=  1.4627049379D+01 Coefficients=  4.1912575824D-02
     Exponent=  4.4501223456D+00 Coefficients=  1.6153841088D-01
     Exponent=  1.5275799647D+00 Coefficients=  3.5706951311D-01
 P 1 1.00
     Exponent=  5.2935117943D-01 Coefficients=  4.4794207502D-01
 P 1 1.00
     Exponent=  1.7478421270D-01 Coefficients=  2.4446069663D-01
 D 1 1.00
     Exponent=  2.3140000000D+00 Coefficients=  1.0000000000D+00
 D 1 1.00
     Exponent=  6.4500000000D-01 Coefficients=  1.0000000000D+00
 F 1 1.00
     Exponent=  1.4280000000D+00 Coefficients=  1.0000000000D+00
 ****
 Centers:      23
 S 8 1.00
     Exponent=  5.6507325256D+05 Coefficients=  2.3660314690D-04
     Exponent=  8.4701723179D+04 Coefficients=  1.8348332508D-03
     Exponent=  1.9276271900D+04 Coefficients=  9.5465849860D-03
     Exponent=  5.4564284576D+03 Coefficients=  3.8877142153D-02
     Exponent=  1.7769503500D+03 Coefficients=  1.2718314231D-01
     Exponent=  6.3919398276D+02 Coefficients=  3.0437662191D-01
     Exponent=  2.4878823961D+02 Coefficients=  4.4490940497D-01
     Exponent=  9.8678305494D+01 Coefficients=  2.4381643058D-01
 S 4 1.00
     Exponent=  6.0607824568D+02 Coefficients= -2.6527158709D-02
     Exponent=  1.8845598484D+02 Coefficients= -1.2484584809D-01
     Exponent=  3.1497144506D+01 Coefficients=  5.6468683559D-01
     Exponent=  1.3736008320D+01 Coefficients=  5.5555268564D-01
 S 2 1.00
     Exponent=  2.1203212766D+01 Coefficients= -2.4940920493D-01
     Exponent=  3.7616420178D+00 Coefficients=  7.1213119743D-01
 S 1 1.00
     Exponent=  1.7735933962D+00 Coefficients=  1.0000000000D+00
 S 1 1.00
     Exponent=  4.5197413664D-01 Coefficients=  1.0000000000D+00
 S 1 1.00
     Exponent=  1.6613377099D-01 Coefficients=  1.0000000000D+00
 P 6 1.00
     Exponent=  3.0196955723D+03 Coefficients=  2.4971049798D-03
     Exponent=  7.1535481126D+02 Coefficients=  2.0419267596D-02
     Exponent=  2.2998328751D+02 Coefficients=  9.6897148309D-02
     Exponent=  8.6167844615D+01 Coefficients=  2.8053901252D-01
     Exponent=  3.4667870802D+01 Coefficients=  4.4606390473D-01
     Exponent=  1.4113870307D+01 Coefficients=  2.4410073923D-01
 P 4 1.00
     Exponent=  5.7085653082D+01 Coefficients= -2.1855950710D-02
     Exponent=  8.8193845840D+00 Coefficients=  3.2707075320D-01
     Exponent=  3.9340302872D+00 Coefficients=  5.7855229520D-01
     Exponent=  1.7998830384D+00 Coefficients=  3.3570987698D-01
 P 1 1.00
     Exponent=  6.6899410512D-01 Coefficients=  1.0000000000D+00
 P 1 1.00
     Exponent=  2.7136238231D-01 Coefficients=  1.0000000000D+00
 P 1 1.00
     Exponent=  1.0083790243D-01 Coefficients=  1.0000000000D+00
 D 5 1.00
     Exponent=  1.6885370257D+02 Coefficients=  8.9663981988D-03
     Exponent=  4.9977949919D+01 Coefficients=  6.2062059316D-02
     Exponent=  1.8274913338D+01 Coefficients=  2.1474732384D-01
     Exponent=  7.2455694631D+00 Coefficients=  4.0335336746D-01
     Exponent=  2.8562315025D+00 Coefficients=  4.2208813080D-01
 D 1 1.00
     Exponent=  1.0459621144D+00 Coefficients=  1.7874813267D-01
 D 1 1.00
     Exponent=  5.6865655000D-01 Coefficients=  1.0000000000D+00
 D 1 1.00
     Exponent=  2.2031490000D-01 Coefficients=  1.0000000000D+00
 F 1 1.00
     Exponent=  5.7083312000D-01 Coefficients=  1.0000000000D+00
 ****
 Ernie: Thresh=  0.10000D-02 Tol=  0.10000D-05 Strict=F.
 There are   673 symmetry adapted cartesian basis functions of A   symmetry.
 There are   586 symmetry adapted basis functions of A   symmetry.
   586 basis functions,   986 primitive gaussians,   673 cartesian basis functions
    71 alpha electrons       71 beta electrons
       nuclear repulsion energy      1374.2189705970 Hartrees.
 IExCor= 4336 DFT=T Ex+Corr=M062X ExCW=0 ScaHFX=  0.540000
 ScaDFX=  1.000000  1.000000  1.000000  1.000000 ScalE2=  1.000000  1.000000
 IRadAn=      0 IRanWt=     -1 IRanGd=            0 ICorTp=0 IEmpDi=131
 NAtoms=   24 NActive=   24 NUniq=   24 SFac= 1.00D+00 NAtFMM=   60 NAOKFM=F Big=F
 Integral buffers will be    262144 words long.
 Regular integral format.
 Two-electron integral symmetry is turned on.
 R6Disp:  Grimme-D3 Dispersion energy=       -0.0011087480 Hartrees.
 Nuclear repulsion after empirical dispersion term =     1374.2178618490 Hartrees.
 ------------------------------------------------------------------------------
 Polarizable Continuum Model (PCM)
 =================================
 Model                : PCM (using non-symmetric T matrix).
 Atomic radii         : UFF (Universal Force Field).
 Polarization charges : Total charges.
 Charge compensation  : None.
 Solution method      : On-the-fly selection.
 Cavity type          : Scaled VdW (van der Waals Surface) (Alpha=1.100).
 Cavity algorithm     : GePol (No added spheres)
                        Default sphere list used, NSphG=   24.
                        Lebedev-Laikov grids with approx.  5.0 points / Ang**2.
                        Smoothing algorithm: Karplus/York (Gamma=1.0000).
                        Polarization charges: spherical gaussians, with
                                              point-specific exponents (IZeta= 3).
                        Self-potential: point-specific (ISelfS= 7).
                        Self-field    : sphere-specific E.n sum rule (ISelfD= 2).
 Solvent              : Acetonitrile, Eps=  35.688000 Eps(inf)=   1.806874
 ------------------------------------------------------------------------------
 GePol: Number of generator spheres                  =      24
 GePol: Total number of spheres                      =      24
 GePol: Number of exposed spheres                    =      24 (100.00%)
 GePol: Number of points                             =    2164
 GePol: Average weight of points                     =       0.13
 GePol: Minimum weight of points                     =   0.10D-08
 GePol: Maximum weight of points                     =    0.20577
 GePol: Number of points with low weight             =     113
 GePol: Fraction of low-weight points (<1% of avg)   =       5.22%
 GePol: Cavity surface area                          =    279.243 Ang**2
 GePol: Cavity volume                                =    305.150 Ang**3
 Leave Link  301 at Tue Jan 14 11:31:10 2020, MaxMem=   183500800 cpu:         1.0
 (Enter E:\Gaussian\G09W\l302.exe)
 NPDir=0 NMtPBC=     1 NCelOv=     1 NCel=       1 NClECP=     1 NCelD=      1
         NCelK=      1 NCelE2=     1 NClLst=     1 CellRange=     0.0.
 One-electron integrals computed using PRISM.
 NBasis=   586 RedAO= T EigKep=  5.70D-06  NBF=   586
 NBsUse=   586 1.00D-06 EigRej= -1.00D+00 NBFU=   586
 Precomputing XC quadrature grid using
 IXCGrd= 4 IRadAn=           0 IRanWt=          -1 IRanGd=           0 AccXCQ= 0.00D+00.
 Generated NRdTot=       0 NPtTot=           0 NUsed=           0 NTot=          16
 NSgBfM=   657   657   657   657   657 MxSgAt=    24 MxSgA2=    24.
 Leave Link  302 at Tue Jan 14 11:31:18 2020, MaxMem=   183500800 cpu:         7.0
 (Enter E:\Gaussian\G09W\l308.exe)
 Leave Link  308 at Tue Jan 14 11:31:20 2020, MaxMem=   183500800 cpu:         1.0
 (Enter E:\Gaussian\G09W\l303.exe)
 DipDrv:  MaxL=1.
 Leave Link  303 at Tue Jan 14 11:31:21 2020, MaxMem=   183500800 cpu:         0.0
 (Enter E:\Gaussian\G09W\l401.exe)
 ExpMin= 9.52D-02 ExpMax= 5.65D+05 ExpMxC= 5.46D+03 IAcc=2 IRadAn=         4 AccDes= 0.00D+00
 Harris functional with IExCor= 1009 and IRadAn=       4 diagonalized for initial guess.
 HarFok:  IExCor= 1009 AccDes= 0.00D+00 IRadAn=         4 IDoV= 1 UseB2=F ITyADJ=14
 ICtDFT=  3500011 ScaDFX=  1.000000  1.000000  1.000000  1.000000
 FoFCou: FMM=F IPFlag=           0 FMFlag=      100000 FMFlg1=           0
         NFxFlg=           0 DoJE=T BraDBF=F KetDBF=T FulRan=T
         wScrn=  0.000000 ICntrl=     500 IOpCl=  0 I1Cent=   200000004 NGrid=           0
         NMat0=    1 NMatS0=      1 NMatT0=    0 NMatD0=    1 NMtDS0=    0 NMtDT0=    0
 Petite list used in FoFCou.
 Harris En= -3261.55416285038    
 JPrj=0 DoOrth=F DoCkMO=F.
 Leave Link  401 at Tue Jan 14 11:32:04 2020, MaxMem=   183500800 cpu:        42.0
 (Enter E:\Gaussian\G09W\l502.exe)
 Closed shell SCF:
 Using DIIS extrapolation, IDIIS=  1040.
 Integral symmetry usage will be decided dynamically.
 IVT=     1385392 IEndB=     1385392 NGot=   183500800 MDV=   182585651
 LenX=   182585651 LenY=   182132049
 Requested convergence on RMS density matrix=1.00D-08 within 128 cycles.
 Requested convergence on MAX density matrix=1.00D-06.
 Requested convergence on             energy=1.00D-06.
 No special actions if energy rises.
 Fock matrices will be formed incrementally for  20 cycles.

 Cycle   1  Pass 1  IDiag  1:
 FoFJK:  IHMeth= 1 ICntrl=       0 DoSepK=F KAlg= 0 I1Cent=   0 FoldK=F
 IRaf= 830000000 NMat=   1 IRICut=       1 DoRegI=T DoRafI=F ISym2E= 0.
 FoFCou: FMM=F IPFlag=           0 FMFlag=      100000 FMFlg1=           0
         NFxFlg=           0 DoJE=F BraDBF=F KetDBF=F FulRan=T
         wScrn=  0.000000 ICntrl=       0 IOpCl=  0 I1Cent=           0 NGrid=           0
         NMat0=    1 NMatS0=      1 NMatT0=    0 NMatD0=    1 NMtDS0=    0 NMtDT0=    0
 Symmetry not used in FoFCou.
 Inv3:  Mode=1 IEnd=    14048688.
 Iteration    1 A*A^-1 deviation from unit magnitude is 2.55D-15 for    237.
 Iteration    1 A*A^-1 deviation from orthogonality  is 1.97D-15 for   1380    156.
 Iteration    1 A^-1*A deviation from unit magnitude is 2.33D-15 for   1341.
 Iteration    1 A^-1*A deviation from orthogonality  is 6.26D-14 for   1846   1844.
 E= -3261.99993343473    
 DIIS: error= 2.82D-02 at cycle   1 NSaved=   1.
 NSaved= 1 IEnMin= 1 EnMin= -3261.99993343473     IErMin= 1 ErrMin= 2.82D-02
 ErrMax= 2.82D-02  0.00D+00 EMaxC= 1.00D-01 BMatC= 6.59D-01 BMatP= 6.59D-01
 IDIUse=3 WtCom= 7.18D-01 WtEn= 2.82D-01
 Coeff-Com:  0.100D+01
 Coeff-En:   0.100D+01
 Coeff:      0.100D+01
 Gap=     0.253 Goal=   None    Shift=    0.000
 GapD=    0.253 DampG=1.000 DampE=0.500 DampFc=0.5000 IDamp=-1.
 Damping current iteration by 5.00D-01
 RMSDP=6.39D-03 MaxDP=4.18D-01              OVMax= 1.67D-01

 Cycle   2  Pass 1  IDiag  1:
 RMSU=  3.19D-03    CP:  1.02D+00
 E= -3262.16747276196     Delta-E=       -0.167539327233 Rises=F Damp=T
 DIIS: error= 7.74D-03 at cycle   2 NSaved=   2.
 NSaved= 2 IEnMin= 2 EnMin= -3262.16747276196     IErMin= 2 ErrMin= 7.74D-03
 ErrMax= 7.74D-03  0.00D+00 EMaxC= 1.00D-01 BMatC= 6.36D-02 BMatP= 6.59D-01
 IDIUse=3 WtCom= 9.23D-01 WtEn= 7.74D-02
 Coeff-Com: -0.110D+00 0.111D+01
 Coeff-En:   0.000D+00 0.100D+01
 Coeff:     -0.101D+00 0.110D+01
 Gap=     0.229 Goal=   None    Shift=    0.000
 RMSDP=2.11D-03 MaxDP=1.42D-01 DE=-1.68D-01 OVMax= 1.66D-01

 Cycle   3  Pass 1  IDiag  1:
 RMSU=  1.65D-03    CP:  9.78D-01  6.07D-01
 E= -3262.31073733239     Delta-E=       -0.143264570424 Rises=F Damp=F
 DIIS: error= 1.34D-02 at cycle   3 NSaved=   3.
 NSaved= 3 IEnMin= 3 EnMin= -3262.31073733239     IErMin= 2 ErrMin= 7.74D-03
 ErrMax= 1.34D-02  0.00D+00 EMaxC= 1.00D-01 BMatC= 5.08D-02 BMatP= 6.36D-02
 IDIUse=3 WtCom= 8.66D-01 WtEn= 1.34D-01
 Coeff-Com: -0.146D+00 0.579D+00 0.567D+00
 Coeff-En:   0.000D+00 0.000D+00 0.100D+01
 Coeff:     -0.126D+00 0.502D+00 0.624D+00
 Gap=     0.214 Goal=   None    Shift=    0.000
 RMSDP=7.88D-04 MaxDP=6.44D-02 DE=-1.43D-01 OVMax= 7.90D-02

 Cycle   4  Pass 1  IDiag  1:
 RMSU=  4.62D-04    CP:  9.87D-01  7.86D-01  8.40D-01
 E= -3262.34209735893     Delta-E=       -0.031360026540 Rises=F Damp=F
 DIIS: error= 5.62D-03 at cycle   4 NSaved=   4.
 NSaved= 4 IEnMin= 4 EnMin= -3262.34209735893     IErMin= 4 ErrMin= 5.62D-03
 ErrMax= 5.62D-03  0.00D+00 EMaxC= 1.00D-01 BMatC= 1.08D-02 BMatP= 5.08D-02
 IDIUse=3 WtCom= 9.44D-01 WtEn= 5.62D-02
 Coeff-Com: -0.390D-01 0.102D+00 0.352D+00 0.585D+00
 Coeff-En:   0.000D+00 0.000D+00 0.197D+00 0.803D+00
 Coeff:     -0.368D-01 0.962D-01 0.343D+00 0.597D+00
 Gap=     0.215 Goal=   None    Shift=    0.000
 RMSDP=3.71D-04 MaxDP=2.96D-02 DE=-3.14D-02 OVMax= 2.58D-02

 Cycle   5  Pass 1  IDiag  1:
 RMSU=  9.97D-05    CP:  9.82D-01  6.95D-01  9.18D-01  6.66D-01
 E= -3262.35059023563     Delta-E=       -0.008492876701 Rises=F Damp=F
 DIIS: error= 4.55D-04 at cycle   5 NSaved=   5.
 NSaved= 5 IEnMin= 5 EnMin= -3262.35059023563     IErMin= 5 ErrMin= 4.55D-04
 ErrMax= 4.55D-04  0.00D+00 EMaxC= 1.00D-01 BMatC= 1.70D-04 BMatP= 1.08D-02
 IDIUse=3 WtCom= 9.95D-01 WtEn= 4.55D-03
 Coeff-Com: -0.573D-02 0.917D-02 0.104D+00 0.241D+00 0.652D+00
 Coeff-En:   0.000D+00 0.000D+00 0.000D+00 0.000D+00 0.100D+01
 Coeff:     -0.571D-02 0.913D-02 0.103D+00 0.240D+00 0.654D+00
 Gap=     0.216 Goal=   None    Shift=    0.000
 RMSDP=5.30D-05 MaxDP=4.45D-03 DE=-8.49D-03 OVMax= 3.04D-03

 Cycle   6  Pass 1  IDiag  1:
 RMSU=  2.51D-05    CP:  9.83D-01  7.07D-01  9.11D-01  6.96D-01  8.19D-01
 E= -3262.35073986189     Delta-E=       -0.000149626256 Rises=F Damp=F
 DIIS: error= 1.17D-04 at cycle   6 NSaved=   6.
 NSaved= 6 IEnMin= 6 EnMin= -3262.35073986189     IErMin= 6 ErrMin= 1.17D-04
 ErrMax= 1.17D-04  0.00D+00 EMaxC= 1.00D-01 BMatC= 1.02D-05 BMatP= 1.70D-04
 IDIUse=3 WtCom= 9.99D-01 WtEn= 1.17D-03
 Coeff-Com:  0.103D-02-0.431D-02 0.142D-01 0.500D-01 0.250D+00 0.690D+00
 Coeff-En:   0.000D+00 0.000D+00 0.000D+00 0.000D+00 0.000D+00 0.100D+01
 Coeff:      0.102D-02-0.431D-02 0.142D-01 0.499D-01 0.249D+00 0.690D+00
 Gap=     0.216 Goal=   None    Shift=    0.000
 RMSDP=3.23D-05 MaxDP=2.21D-03 DE=-1.50D-04 OVMax= 6.73D-04

 Cycle   7  Pass 1  IDiag  1:
 RMSU=  1.20D-05    CP:  9.82D-01  6.98D-01  9.15D-01  7.01D-01  8.70D-01
                    CP:  9.51D-01
 E= -3262.35074889695     Delta-E=       -0.000009035064 Rises=F Damp=F
 DIIS: error= 5.28D-05 at cycle   7 NSaved=   7.
 NSaved= 7 IEnMin= 7 EnMin= -3262.35074889695     IErMin= 7 ErrMin= 5.28D-05
 ErrMax= 5.28D-05  0.00D+00 EMaxC= 1.00D-01 BMatC= 1.55D-06 BMatP= 1.02D-05
 IDIUse=1 WtCom= 1.00D+00 WtEn= 0.00D+00
 Coeff-Com:  0.108D-02-0.293D-02-0.571D-02-0.813D-02 0.325D-01 0.282D+00
 Coeff-Com:  0.702D+00
 Coeff:      0.108D-02-0.293D-02-0.571D-02-0.813D-02 0.325D-01 0.282D+00
 Coeff:      0.702D+00
 Gap=     0.216 Goal=   None    Shift=    0.000
 RMSDP=7.38D-06 MaxDP=4.22D-04 DE=-9.04D-06 OVMax= 5.96D-04

 Cycle   8  Pass 1  IDiag  1:
 RMSU=  4.86D-06    CP:  9.82D-01  6.97D-01  9.15D-01  7.03D-01  8.84D-01
                    CP:  1.02D+00  9.28D-01
 E= -3262.35075048302     Delta-E=       -0.000001586073 Rises=F Damp=F
 DIIS: error= 2.49D-05 at cycle   8 NSaved=   8.
 NSaved= 8 IEnMin= 8 EnMin= -3262.35075048302     IErMin= 8 ErrMin= 2.49D-05
 ErrMax= 2.49D-05  0.00D+00 EMaxC= 1.00D-01 BMatC= 4.40D-07 BMatP= 1.55D-06
 IDIUse=1 WtCom= 1.00D+00 WtEn= 0.00D+00
 Coeff-Com:  0.294D-03-0.597D-03-0.490D-02-0.132D-01-0.253D-01 0.873D-02
 Coeff-Com:  0.375D+00 0.660D+00
 Coeff:      0.294D-03-0.597D-03-0.490D-02-0.132D-01-0.253D-01 0.873D-02
 Coeff:      0.375D+00 0.660D+00
 Gap=     0.216 Goal=   None    Shift=    0.000
 RMSDP=5.03D-06 MaxDP=3.33D-04 DE=-1.59D-06 OVMax= 2.15D-04

 Cycle   9  Pass 1  IDiag  1:
 RMSU=  1.41D-06    CP:  9.82D-01  6.96D-01  9.15D-01  7.03D-01  8.96D-01
                    CP:  1.04D+00  1.12D+00  7.90D-01
 E= -3262.35075090142     Delta-E=       -0.000000418394 Rises=F Damp=F
 DIIS: error= 5.35D-06 at cycle   9 NSaved=   9.
 NSaved= 9 IEnMin= 9 EnMin= -3262.35075090142     IErMin= 9 ErrMin= 5.35D-06
 ErrMax= 5.35D-06  0.00D+00 EMaxC= 1.00D-01 BMatC= 2.97D-08 BMatP= 4.40D-07
 IDIUse=1 WtCom= 1.00D+00 WtEn= 0.00D+00
 Coeff-Com:  0.218D-04 0.346D-04-0.122D-02-0.429D-02-0.116D-01-0.305D-01
 Coeff-Com:  0.735D-01 0.212D+00 0.762D+00
 Coeff:      0.218D-04 0.346D-04-0.122D-02-0.429D-02-0.116D-01-0.305D-01
 Coeff:      0.735D-01 0.212D+00 0.762D+00
 Gap=     0.216 Goal=   None    Shift=    0.000
 RMSDP=2.17D-06 MaxDP=1.24D-04 DE=-4.18D-07 OVMax= 1.08D-04

 Cycle  10  Pass 1  IDiag  1:
 RMSU=  4.60D-07    CP:  9.82D-01  6.95D-01  9.16D-01  7.03D-01  8.98D-01
                    CP:  1.04D+00  1.14D+00  9.10D-01  1.04D+00
 E= -3262.35075094041     Delta-E=       -0.000000038994 Rises=F Damp=F
 DIIS: error= 4.00D-06 at cycle  10 NSaved=  10.
 NSaved=10 IEnMin=10 EnMin= -3262.35075094041     IErMin=10 ErrMin= 4.00D-06
 ErrMax= 4.00D-06  0.00D+00 EMaxC= 1.00D-01 BMatC= 6.65D-09 BMatP= 2.97D-08
 IDIUse=1 WtCom= 1.00D+00 WtEn= 0.00D+00
 Coeff-Com: -0.381D-04 0.112D-03 0.415D-03 0.530D-03-0.365D-03-0.172D-01
 Coeff-Com: -0.293D-01-0.361D-01 0.336D+00 0.746D+00
 Coeff:     -0.381D-04 0.112D-03 0.415D-03 0.530D-03-0.365D-03-0.172D-01
 Coeff:     -0.293D-01-0.361D-01 0.336D+00 0.746D+00
 Gap=     0.216 Goal=   None    Shift=    0.000
 RMSDP=8.31D-07 MaxDP=6.24D-05 DE=-3.90D-08 OVMax= 6.03D-05

 Cycle  11  Pass 1  IDiag  1:
 RMSU=  1.81D-07    CP:  9.82D-01  6.95D-01  9.16D-01  7.03D-01  8.99D-01
                    CP:  1.04D+00  1.17D+00  8.89D-01  1.18D+00  1.08D+00
 E= -3262.35075095063     Delta-E=       -0.000000010218 Rises=F Damp=F
 DIIS: error= 1.69D-06 at cycle  11 NSaved=  11.
 NSaved=11 IEnMin=11 EnMin= -3262.35075095063     IErMin=11 ErrMin= 1.69D-06
 ErrMax= 1.69D-06  0.00D+00 EMaxC= 1.00D-01 BMatC= 9.43D-10 BMatP= 6.65D-09
 IDIUse=1 WtCom= 1.00D+00 WtEn= 0.00D+00
 Coeff-Com: -0.220D-04 0.483D-04 0.384D-03 0.882D-03 0.136D-02-0.400D-02
 Coeff-Com: -0.210D-01-0.482D-01 0.273D-01 0.316D+00 0.727D+00
 Coeff:     -0.220D-04 0.483D-04 0.384D-03 0.882D-03 0.136D-02-0.400D-02
 Coeff:     -0.210D-01-0.482D-01 0.273D-01 0.316D+00 0.727D+00
 Gap=     0.216 Goal=   None    Shift=    0.000
 RMSDP=4.10D-07 MaxDP=2.72D-05 DE=-1.02D-08 OVMax= 2.13D-05

 Cycle  12  Pass 1  IDiag  1:
 RMSU=  5.87D-08    CP:  9.82D-01  6.95D-01  9.16D-01  7.03D-01  8.99D-01
                    CP:  1.04D+00  1.17D+00  9.00D-01  1.21D+00  1.22D+00
                    CP:  1.10D+00
 E= -3262.35075095204     Delta-E=       -0.000000001410 Rises=F Damp=F
 DIIS: error= 5.98D-07 at cycle  12 NSaved=  12.
 NSaved=12 IEnMin=12 EnMin= -3262.35075095204     IErMin=12 ErrMin= 5.98D-07
 ErrMax= 5.98D-07  0.00D+00 EMaxC= 1.00D-01 BMatC= 6.98D-11 BMatP= 9.43D-10
 IDIUse=1 WtCom= 1.00D+00 WtEn= 0.00D+00
 Coeff-Com:  0.153D-05-0.645D-05 0.383D-04 0.142D-03 0.443D-03 0.134D-02
 Coeff-Com: -0.378D-03-0.105D-01-0.395D-01-0.421D-04 0.181D+00 0.867D+00
 Coeff:      0.153D-05-0.645D-05 0.383D-04 0.142D-03 0.443D-03 0.134D-02
 Coeff:     -0.378D-03-0.105D-01-0.395D-01-0.421D-04 0.181D+00 0.867D+00
 Gap=     0.216 Goal=   None    Shift=    0.000
 RMSDP=7.18D-08 MaxDP=5.59D-06 DE=-1.41D-09 OVMax= 9.28D-06

 Cycle  13  Pass 1  IDiag  1:
 RMSU=  2.45D-08    CP:  9.82D-01  6.95D-01  9.16D-01  7.03D-01  8.99D-01
                    CP:  1.04D+00  1.17D+00  8.96D-01  1.22D+00  1.25D+00
                    CP:  1.23D+00  1.18D+00
 E= -3262.35075095229     Delta-E=       -0.000000000254 Rises=F Damp=F
 DIIS: error= 2.69D-07 at cycle  13 NSaved=  13.
 NSaved=13 IEnMin=13 EnMin= -3262.35075095229     IErMin=13 ErrMin= 2.69D-07
 ErrMax= 2.69D-07  0.00D+00 EMaxC= 1.00D-01 BMatC= 2.04D-11 BMatP= 6.98D-11
 IDIUse=1 WtCom= 1.00D+00 WtEn= 0.00D+00
 Coeff-Com:  0.353D-05-0.920D-05-0.317D-04-0.487D-04 0.386D-04 0.110D-02
 Coeff-Com:  0.255D-02 0.732D-03-0.224D-01-0.418D-01-0.261D-01 0.408D+00
 Coeff-Com:  0.678D+00
 Coeff:      0.353D-05-0.920D-05-0.317D-04-0.487D-04 0.386D-04 0.110D-02
 Coeff:      0.255D-02 0.732D-03-0.224D-01-0.418D-01-0.261D-01 0.408D+00
 Coeff:      0.678D+00
 Gap=     0.216 Goal=   None    Shift=    0.000
 RMSDP=3.39D-08 MaxDP=2.38D-06 DE=-2.54D-10 OVMax= 3.02D-06

 Cycle  14  Pass 1  IDiag  1:
 RMSU=  9.72D-09    CP:  9.82D-01  6.95D-01  9.16D-01  7.03D-01  9.00D-01
                    CP:  1.04D+00  1.18D+00  8.96D-01  1.23D+00  1.27D+00
                    CP:  1.26D+00  1.29D+00  1.09D+00
 E= -3262.35075095238     Delta-E=       -0.000000000091 Rises=F Damp=F
 DIIS: error= 9.19D-08 at cycle  14 NSaved=  14.
 NSaved=14 IEnMin=14 EnMin= -3262.35075095238     IErMin=14 ErrMin= 9.19D-08
 ErrMax= 9.19D-08  0.00D+00 EMaxC= 1.00D-01 BMatC= 1.98D-12 BMatP= 2.04D-11
 IDIUse=1 WtCom= 1.00D+00 WtEn= 0.00D+00
 Coeff-Com:  0.738D-06-0.156D-05-0.155D-04-0.379D-04-0.627D-04 0.883D-04
 Coeff-Com:  0.104D-02 0.206D-02-0.248D-03-0.126D-01-0.371D-01-0.177D-01
 Coeff-Com:  0.235D+00 0.830D+00
 Coeff:      0.738D-06-0.156D-05-0.155D-04-0.379D-04-0.627D-04 0.883D-04
 Coeff:      0.104D-02 0.206D-02-0.248D-03-0.126D-01-0.371D-01-0.177D-01
 Coeff:      0.235D+00 0.830D+00
 Gap=     0.216 Goal=   None    Shift=    0.000
 RMSDP=5.77D-09 MaxDP=1.76D-07 DE=-9.09D-11 OVMax= 1.35D-06

 Error on total polarization charges =  0.01663
 SCF Done:  E(RM062X) =  -3262.35075095     A.U. after   14 cycles
            NFock= 14  Conv=0.58D-08     -V/T= 2.0021
 KE= 3.255417811007D+03 PE=-1.050263834920D+04 EE= 2.610651925390D+03
 Leave Link  502 at Tue Jan 14 13:53:18 2020, MaxMem=   183500800 cpu:      8473.0
 (Enter E:\Gaussian\G09W\l801.exe)
 DoSCS=F DFT=T ScalE2(SS,OS)=  1.000000  1.000000
 ExpMin= 9.52D-02 ExpMax= 5.65D+05 ExpMxC= 5.46D+03 IAcc=3 IRadAn=         5 AccDes= 0.00D+00
 HarFok:  IExCor=  205 AccDes= 0.00D+00 IRadAn=         5 IDoV=-2 UseB2=F ITyADJ=14
 ICtDFT= 12500011 ScaDFX=  1.000000  1.000000  1.000000  1.000000
 Largest valence mixing into a core orbital is  1.08D-04
 Largest core mixing into a valence orbital is  3.30D-05
 Range of M.O.s used for correlation:    26   586
 NBasis=   586 NAE=    71 NBE=    71 NFC=    25 NFV=     0
 NROrb=    561 NOA=    46 NOB=    46 NVA=   515 NVB=   515

 **** Warning!!: The largest alpha MO coefficient is  0.67317466D+02

 Leave Link  801 at Tue Jan 14 13:53:22 2020, MaxMem=   183500800 cpu:         2.0
 (Enter E:\Gaussian\G09W\l914.exe)
 RHF ground state
 MDV=   183500800 DFT=T DoStab=F Mixed=T DoRPA=T DoScal=F NonHer=T
 NEqPCM:  Using non-equilibrium solvation (IEInf=1, Eps=  35.6880, EpsInf=   1.8069)
 Inv3:  Mode=1 IEnd=    14048688.
 Iteration    1 A*A^-1 deviation from unit magnitude is 2.22D-15 for     14.
 Iteration    1 A*A^-1 deviation from orthogonality  is 1.33D-15 for   1191    902.
 Iteration    1 A^-1*A deviation from unit magnitude is 2.44D-15 for   1497.
 Iteration    1 A^-1*A deviation from orthogonality  is 1.44D-15 for   1319    702.
 Making orbital integer symmetry assigments:
 Orbital symmetries:
       Occupied  (A) (A) (A) (A) (A) (A) (A) (A) (A) (A) (A) (A)
                 (A) (A) (A) (A) (A) (A) (A) (A) (A) (A) (A) (A)
                 (A) (A) (A) (A) (A) (A) (A) (A) (A) (A) (A) (A)
                 (A) (A) (A) (A) (A) (A) (A) (A) (A) (A) (A) (A)
                 (A) (A) (A) (A) (A) (A) (A) (A) (A) (A) (A) (A)
                 (A) (A) (A) (A) (A) (A) (A) (A) (A) (A) (A)
       Virtual   (A) (A) (A) (A) (A) (A) (A) (A) (A) (A) (A) (A)
                 (A) (A) (A) (A) (A) (A) (A) (A) (A) (A) (A) (A)
                 (A) (A) (A) (A) (A) (A) (A) (A) (A) (A) (A) (A)
                 (A) (A) (A) (A) (A) (A) (A) (A) (A) (A) (A) (A)
                 (A) (A) (A) (A) (A) (A) (A) (A) (A) (A) (A) (A)
                 (A) (A) (A) (A) (A) (A) (A) (A) (A) (A) (A) (A)
                 (A) (A) (A) (A) (A) (A) (A) (A) (A) (A) (A) (A)
                 (A) (A) (A) (A) (A) (A) (A) (A) (A) (A) (A) (A)
                 (A) (A) (A) (A) (A) (A) (A) (A) (A) (A) (A) (A)
                 (A) (A) (A) (A) (A) (A) (A) (A) (A) (A) (A) (A)
                 (A) (A) (A) (A) (A) (A) (A) (A) (A) (A) (A) (A)
                 (A) (A) (A) (A) (A) (A) (A) (A) (A) (A) (A) (A)
                 (A) (A) (A) (A) (A) (A) (A) (A) (A) (A) (A) (A)
                 (A) (A) (A) (A) (A) (A) (A) (A) (A) (A) (A) (A)
                 (A) (A) (A) (A) (A) (A) (A) (A) (A) (A) (A) (A)
                 (A) (A) (A) (A) (A) (A) (A) (A) (A) (A) (A) (A)
                 (A) (A) (A) (A) (A) (A) (A) (A) (A) (A) (A) (A)
                 (A) (A) (A) (A) (A) (A) (A) (A) (A) (A) (A) (A)
                 (A) (A) (A) (A) (A) (A) (A) (A) (A) (A) (A) (A)
                 (A) (A) (A) (A) (A) (A) (A) (A) (A) (A) (A) (A)
                 (A) (A) (A) (A) (A) (A) (A) (A) (A) (A) (A) (A)
                 (A) (A) (A) (A) (A) (A) (A) (A) (A) (A) (A) (A)
                 (A) (A) (A) (A) (A) (A) (A) (A) (A) (A) (A) (A)
                 (A) (A) (A) (A) (A) (A) (A) (A) (A) (A) (A) (A)
                 (A) (A) (A) (A) (A) (A) (A) (A) (A) (A) (A) (A)
                 (A) (A) (A) (A) (A) (A) (A) (A) (A) (A) (A) (A)
                 (A) (A) (A) (A) (A) (A) (A) (A) (A) (A) (A) (A)
                 (A) (A) (A) (A) (A) (A) (A) (A) (A) (A) (A) (A)
                 (A) (A) (A) (A) (A) (A) (A) (A) (A) (A) (A) (A)
                 (A) (A) (A) (A) (A) (A) (A) (A) (A) (A) (A) (A)
                 (A) (A) (A) (A) (A) (A) (A) (A) (A) (A) (A) (A)
                 (A) (A) (A) (A) (A) (A) (A) (A) (A) (A) (A) (A)
                 (A) (A) (A) (A) (A) (A) (A) (A) (A) (A) (A) (A)
                 (A) (A) (A) (A) (A) (A) (A) (A) (A) (A) (A) (A)
                 (A) (A) (A) (A) (A) (A) (A) (A) (A) (A) (A) (A)
                 (A) (A) (A) (A) (A) (A) (A) (A) (A) (A) (A) (A)
                 (A) (A) (A) (A) (A) (A) (A) (A) (A) (A) (A) (A)
                 (A) (A) (A) (A) (A) (A) (A) (A) (A) (A) (A) (A)
                 (A) (A) (A) (A) (A) (A) (A) (A) (A) (A) (A) (A)
                 (A) (A) (A) (A) (A) (A) (A) (A) (A) (A) (A) (A)
                 (A) (A) (A) (A) (A) (A) (A) (A) (A) (A) (A) (A)
                 (A) (A) (A) (A) (A) (A) (A) (A) (A) (A) (A) (A)
                 (A) (A) (A) (A) (A) (A) (A) (A) (A) (A) (A)
    12 initial guesses have been made.
 Convergence on wavefunction:    0.001000000000000
 Davidson Disk Diagonalization:  ConvIn= 1.00D-03 SkipCon=T Conv= 1.00D-03.
 Max sub-space:   200 roots to seek:    12 dimension of matrix:        47380
 Iteration     1 Dimension    12 NMult     0 NNew     12
 CISAX will form    12 AO SS matrices at one time.
 NMat=    12 NSing=    12 JSym2X= 0.
 FoFJK:  IHMeth= 1 ICntrl=       0 DoSepK=F KAlg= 0 I1Cent=   0 FoldK=F
 IRaf=         0 NMat=  24 IRICut=       1 DoRegI=T DoRafI=F ISym2E= 0.
 New state      1 was old state      5
 New state      2 was old state      1
 New state      3 was old state      7
 Excitation Energies [eV] at current iteration:
 Root      1 :     3.682901791720030
 Root      2 :     3.986326456016800
 Root      3 :     4.064084637118013
 Root      4 :     4.389354332199440
 Root      5 :     4.555556632306002
 Root      6 :     5.268232153181577
 Root      7 :     5.649963277357750
 Root      8 :     5.742626872529803
 Root      9 :     6.147840095747428
 Root     10 :     6.291527747014729
 Root     11 :     6.351469556669612
 Root     12 :     6.617363812098143
 Iteration     2 Dimension    18 NMult    12 NNew      6
 CISAX will form     6 AO SS matrices at one time.
 NMat=     6 NSing=     6 JSym2X= 0.
 Root      1 not converged, maximum delta is    0.107319876641137
 New state      2 was old state      3
 Root      2 not converged, maximum delta is    0.170870536973111
 New state      3 was old state      2
 Root      3 not converged, maximum delta is    0.051639161032941
 Excitation Energies [eV] at current iteration:
 Root      1 :     3.069719615313648   Change is   -0.613182176406382
 Root      2 :     3.334631080286877   Change is   -0.729453556831136
 Root      3 :     3.681120355123818   Change is   -0.305206100892981
 Iteration     3 Dimension    24 NMult    18 NNew      6
 CISAX will form     6 AO SS matrices at one time.
 NMat=     6 NSing=     6 JSym2X= 0.
 Root      1 not converged, maximum delta is    0.024128055703281
 Root      2 not converged, maximum delta is    0.035618678542415
 Root      3 not converged, maximum delta is    0.009241500672747
 Excitation Energies [eV] at current iteration:
 Root      1 :     3.025921775876870   Change is   -0.043797839436778
 Root      2 :     3.290452486688889   Change is   -0.044178593597988
 Root      3 :     3.664371800790416   Change is   -0.016748554333402
 Iteration     4 Dimension    30 NMult    24 NNew      6
 CISAX will form     6 AO SS matrices at one time.
 NMat=     6 NSing=     6 JSym2X= 0.
 Root      1 not converged, maximum delta is    0.005937451847669
 Root      2 not converged, maximum delta is    0.005025511775192
 Root      3 not converged, maximum delta is    0.006503931785864
 Excitation Energies [eV] at current iteration:
 Root      1 :     3.023303888066733   Change is   -0.002617887810136
 Root      2 :     3.288212292752047   Change is   -0.002240193936842
 Root      3 :     3.660885732787925   Change is   -0.003486068002491
 Iteration     5 Dimension    36 NMult    30 NNew      6
 CISAX will form     6 AO SS matrices at one time.
 NMat=     6 NSing=     6 JSym2X= 0.
 Root      1 not converged, maximum delta is    0.001390244593108
 Root      2 not converged, maximum delta is    0.001487931715354
 Root      3 not converged, maximum delta is    0.001311121835334
 Excitation Energies [eV] at current iteration:
 Root      1 :     3.023158282266258   Change is   -0.000145605800475
 Root      2 :     3.288082440617784   Change is   -0.000129852134263
 Root      3 :     3.660658496037484   Change is   -0.000227236750441
 Iteration     6 Dimension    42 NMult    36 NNew      6
 CISAX will form     6 AO SS matrices at one time.
 NMat=     6 NSing=     6 JSym2X= 0.
 Root      1 has converged.
 Root      2 has converged.
 Root      3 has converged.
 Excitation Energies [eV] at current iteration:
 Root      1 :     3.023152494100363   Change is   -0.000005788165894
 Root      2 :     3.288074441953048   Change is   -0.000007998664735
 Root      3 :     3.660613156195916   Change is   -0.000045339841568
 Convergence achieved on expansion vectors.
 ***********************************************************************
 Excited states from <AA,BB:AA,BB> singles matrix:
 ***********************************************************************
 
 1PDM for each excited state written to RWF  633
 Ground to excited state transition densities written to RWF  633
 Ground to excited state transition electric dipole moments (Au):
       state          X           Y           Z        Dip. S.      Osc.
         1         0.0000      0.0000      0.0012      0.0000      0.0000
         2         0.0000      0.0000     -0.0007      0.0000      0.0000
         3         0.7206      0.0448      0.0000      0.5212      0.0467
 Ground to excited state transition velocity dipole moments (Au):
       state          X           Y           Z        Dip. S.      Osc.
         1         0.0000      0.0000     -0.0002      0.0000      0.0000
         2         0.0000      0.0000      0.0001      0.0000      0.0000
         3        -0.1008     -0.0062      0.0000      0.0102      0.0505
 Ground to excited state transition magnetic dipole moments (Au):
       state          X           Y           Z
         1        -0.2003     -0.9400      0.0000
         2         0.0577      0.2851     -0.0001
         3         0.0000      0.0002      1.4649
 Ground to excited state transition velocity quadrupole moments (Au):
       state          XX          YY          ZZ          XY          XZ          YZ
         1         0.0000      0.0000      0.0000      0.0000      0.0314     -0.0062
         2        -0.0001      0.0000      0.0000      0.0000     -0.0129      0.0019
         3         0.3316     -0.2408      0.0069      0.3214      0.0000      0.0000
 <0|del|b> * <b|rxdel|0> + <0|del|b> * <b|delr+rdel|0>
 Rotatory Strengths (R) in cgs (10**-40 erg-esu-cm/Gauss)
       state          XX          YY          ZZ    R(velocity)    E-M Angle
         1        -0.0025     -0.0038     -0.0059     -0.0041       90.00
         2         0.0008     -0.0018     -0.0009     -0.0006       90.00
         3        -0.0135     -0.0106     -0.0003     -0.0081       90.00
 1/2[<0|r|b>*<b|rxdel|0> + (<0|rxdel|b>*<b|r|0>)*]
 Rotatory Strengths (R) in cgs (10**-40 erg-esu-cm/Gauss)
       state          XX          YY          ZZ     R(length)
         1        -0.0064      0.0014      0.0000     -0.0017
         2        -0.0009      0.0029      0.0000      0.0007
         3        -0.0018     -0.0051     -0.0268     -0.0112
  1/2[<0|del|b>*<b|r|0> + (<0|r|b>*<b|del|0>)*] (Au)
       state          X           Y           Z        Dip. S.   Osc.(frdel)
         1         0.0000      0.0000      0.0000      0.0000      0.0000
         2         0.0000      0.0000      0.0000      0.0000      0.0000
         3        -0.0726     -0.0003      0.0000      0.0729      0.0486

 Excitation energies and oscillator strengths:
 
 Excited State   1:      Singlet-A      3.0232 eV  410.12 nm  f=0.0000  <S**2>=0.000
      65 -> 73         0.14334
      65 -> 78        -0.10047
      66 -> 72         0.20070
      66 -> 73         0.12003
      67 -> 72         0.61497
 This state for optimization and/or second-order correction.
 Total Energy, E(TD-HF/TD-KS) =  -3262.23965214    
 Copying the excited state density for this state as the 1-particle RhoCI density.
 
 Excited State   2:      Singlet-A      3.2881 eV  377.07 nm  f=0.0000  <S**2>=0.000
      65 -> 72         0.51915
      65 -> 73        -0.10137
      66 -> 72         0.32169
      67 -> 72        -0.14912
      67 -> 73         0.22439
      67 -> 78        -0.13789
 
 Excited State   3:      Singlet-A      3.6606 eV  338.70 nm  f=0.0467  <S**2>=0.000
      64 -> 72        -0.10489
      69 -> 72        -0.20500
      70 -> 72         0.17226
      71 -> 72         0.63473
 SavETr:  write IOETrn=   770 NScale= 10 NData=  16 NLR=1 NState=    3 LETran=      62.
 Leave Link  914 at Tue Jan 14 17:56:25 2020, MaxMem=   183500800 cpu:     14582.0
 (Enter E:\Gaussian\G09W\l601.exe)
 Copying SCF densities to generalized density rwf, IOpCl= 0 IROHF=0.

 **********************************************************************

            Population analysis using the SCF density.

 **********************************************************************

 Orbital symmetries:
       Occupied  (A) (A) (A) (A) (A) (A) (A) (A) (A) (A) (A) (A)
                 (A) (A) (A) (A) (A) (A) (A) (A) (A) (A) (A) (A)
                 (A) (A) (A) (A) (A) (A) (A) (A) (A) (A) (A) (A)
                 (A) (A) (A) (A) (A) (A) (A) (A) (A) (A) (A) (A)
                 (A) (A) (A) (A) (A) (A) (A) (A) (A) (A) (A) (A)
                 (A) (A) (A) (A) (A) (A) (A) (A) (A) (A) (A)
       Virtual   (A) (A) (A) (A) (A) (A) (A) (A) (A) (A) (A) (A)
                 (A) (A) (A) (A) (A) (A) (A) (A) (A) (A) (A) (A)
                 (A) (A) (A) (A) (A) (A) (A) (A) (A) (A) (A) (A)
                 (A) (A) (A) (A) (A) (A) (A) (A) (A) (A) (A) (A)
                 (A) (A) (A) (A) (A) (A) (A) (A) (A) (A) (A) (A)
                 (A) (A) (A) (A) (A) (A) (A) (A) (A) (A) (A) (A)
                 (A) (A) (A) (A) (A) (A) (A) (A) (A) (A) (A) (A)
                 (A) (A) (A) (A) (A) (A) (A) (A) (A) (A) (A) (A)
                 (A) (A) (A) (A) (A) (A) (A) (A) (A) (A) (A) (A)
                 (A) (A) (A) (A) (A) (A) (A) (A) (A) (A) (A) (A)
                 (A) (A) (A) (A) (A) (A) (A) (A) (A) (A) (A) (A)
                 (A) (A) (A) (A) (A) (A) (A) (A) (A) (A) (A) (A)
                 (A) (A) (A) (A) (A) (A) (A) (A) (A) (A) (A) (A)
                 (A) (A) (A) (A) (A) (A) (A) (A) (A) (A) (A) (A)
                 (A) (A) (A) (A) (A) (A) (A) (A) (A) (A) (A) (A)
                 (A) (A) (A) (A) (A) (A) (A) (A) (A) (A) (A) (A)
                 (A) (A) (A) (A) (A) (A) (A) (A) (A) (A) (A) (A)
                 (A) (A) (A) (A) (A) (A) (A) (A) (A) (A) (A) (A)
                 (A) (A) (A) (A) (A) (A) (A) (A) (A) (A) (A) (A)
                 (A) (A) (A) (A) (A) (A) (A) (A) (A) (A) (A) (A)
                 (A) (A) (A) (A) (A) (A) (A) (A) (A) (A) (A) (A)
                 (A) (A) (A) (A) (A) (A) (A) (A) (A) (A) (A) (A)
                 (A) (A) (A) (A) (A) (A) (A) (A) (A) (A) (A) (A)
                 (A) (A) (A) (A) (A) (A) (A) (A) (A) (A) (A) (A)
                 (A) (A) (A) (A) (A) (A) (A) (A) (A) (A) (A) (A)
                 (A) (A) (A) (A) (A) (A) (A) (A) (A) (A) (A) (A)
                 (A) (A) (A) (A) (A) (A) (A) (A) (A) (A) (A) (A)
                 (A) (A) (A) (A) (A) (A) (A) (A) (A) (A) (A) (A)
                 (A) (A) (A) (A) (A) (A) (A) (A) (A) (A) (A) (A)
                 (A) (A) (A) (A) (A) (A) (A) (A) (A) (A) (A) (A)
                 (A) (A) (A) (A) (A) (A) (A) (A) (A) (A) (A) (A)
                 (A) (A) (A) (A) (A) (A) (A) (A) (A) (A) (A) (A)
                 (A) (A) (A) (A) (A) (A) (A) (A) (A) (A) (A) (A)
                 (A) (A) (A) (A) (A) (A) (A) (A) (A) (A) (A) (A)
                 (A) (A) (A) (A) (A) (A) (A) (A) (A) (A) (A) (A)
                 (A) (A) (A) (A) (A) (A) (A) (A) (A) (A) (A) (A)
                 (A) (A) (A) (A) (A) (A) (A) (A) (A) (A) (A) (A)
                 (A) (A) (A) (A) (A) (A) (A) (A) (A) (A) (A) (A)
                 (A) (A) (A) (A) (A) (A) (A) (A) (A) (A) (A) (A)
                 (A) (A) (A) (A) (A) (A) (A) (A) (A) (A) (A) (A)
                 (A) (A) (A) (A) (A) (A) (A) (A) (A) (A) (A) (A)
                 (A) (A) (A) (A) (A) (A) (A) (A) (A) (A) (A) (A)
                 (A) (A) (A) (A) (A) (A) (A) (A) (A) (A) (A)
 The electronic state is 1-A.
 Alpha  occ. eigenvalues -- -485.39010 -63.37474 -57.19414 -57.19175 -57.19163
 Alpha  occ. eigenvalues --  -19.64424 -19.63609 -10.65918 -10.65367 -10.62864
 Alpha  occ. eigenvalues --  -10.58821 -10.58469 -10.58059 -10.57986 -10.57936
 Alpha  occ. eigenvalues --  -10.57863 -10.57671 -10.56855 -10.56818 -10.56713
 Alpha  occ. eigenvalues --  -10.56684  -9.04116  -6.86530  -6.85645  -6.85604
 Alpha  occ. eigenvalues --   -2.89905  -2.89588  -2.89545  -2.88721  -2.88720
 Alpha  occ. eigenvalues --   -1.18104  -1.15981  -1.01103  -0.99166  -0.93730
 Alpha  occ. eigenvalues --   -0.89986  -0.88209  -0.87687  -0.84644  -0.79264
 Alpha  occ. eigenvalues --   -0.75600  -0.72884  -0.70366  -0.67269  -0.64432
 Alpha  occ. eigenvalues --   -0.63100  -0.58877  -0.56599  -0.56261  -0.54405
 Alpha  occ. eigenvalues --   -0.53702  -0.53509  -0.52780  -0.51739  -0.51232
 Alpha  occ. eigenvalues --   -0.50349  -0.48641  -0.47604  -0.45998  -0.44273
 Alpha  occ. eigenvalues --   -0.44182  -0.43453  -0.42361  -0.39012  -0.36874
 Alpha  occ. eigenvalues --   -0.36533  -0.35159  -0.34455  -0.33569  -0.33051
 Alpha  occ. eigenvalues --   -0.31700
 Alpha virt. eigenvalues --   -0.10122  -0.04779  -0.01148   0.00436   0.02392
 Alpha virt. eigenvalues --    0.07484   0.07896   0.08852   0.09974   0.10849
 Alpha virt. eigenvalues --    0.11132   0.11723   0.13233   0.13747   0.14483
 Alpha virt. eigenvalues --    0.14660   0.16423   0.16580   0.17917   0.19890
 Alpha virt. eigenvalues --    0.20248   0.21257   0.21762   0.22147   0.22450
 Alpha virt. eigenvalues --    0.22899   0.24012   0.24186   0.24413   0.25245
 Alpha virt. eigenvalues --    0.25556   0.25629   0.26746   0.26760   0.27017
 Alpha virt. eigenvalues --    0.27355   0.28470   0.29133   0.29475   0.29960
 Alpha virt. eigenvalues --    0.30599   0.31745   0.32035   0.33007   0.33097
 Alpha virt. eigenvalues --    0.33637   0.33969   0.34253   0.34708   0.35874
 Alpha virt. eigenvalues --    0.36358   0.37629   0.38092   0.38428   0.38584
 Alpha virt. eigenvalues --    0.39136   0.39769   0.40149   0.41108   0.41503
 Alpha virt. eigenvalues --    0.41961   0.43676   0.43764   0.44086   0.45475
 Alpha virt. eigenvalues --    0.46338   0.46395   0.47492   0.48784   0.49442
 Alpha virt. eigenvalues --    0.50433   0.50676   0.50765   0.51448   0.51850
 Alpha virt. eigenvalues --    0.52741   0.52792   0.53988   0.54496   0.55915
 Alpha virt. eigenvalues --    0.56252   0.56942   0.57042   0.59303   0.59767
 Alpha virt. eigenvalues --    0.61659   0.61762   0.63083   0.64257   0.65337
 Alpha virt. eigenvalues --    0.66494   0.67659   0.67845   0.67916   0.68135
 Alpha virt. eigenvalues --    0.68925   0.69313   0.70869   0.72212   0.72354
 Alpha virt. eigenvalues --    0.73078   0.73857   0.74012   0.75561   0.76394
 Alpha virt. eigenvalues --    0.76422   0.76724   0.77693   0.77869   0.78522
 Alpha virt. eigenvalues --    0.79310   0.80903   0.80933   0.82060   0.82084
 Alpha virt. eigenvalues --    0.83183   0.85531   0.86265   0.87363   0.87884
 Alpha virt. eigenvalues --    0.88535   0.89706   0.90472   0.90987   0.91061
 Alpha virt. eigenvalues --    0.92342   0.92572   0.93071   0.96167   0.97512
 Alpha virt. eigenvalues --    0.97787   0.98221   0.99483   0.99880   1.01128
 Alpha virt. eigenvalues --    1.02225   1.04516   1.04554   1.05636   1.06901
 Alpha virt. eigenvalues --    1.10315   1.10373   1.10654   1.12619   1.14396
 Alpha virt. eigenvalues --    1.14680   1.15179   1.15656   1.18756   1.20039
 Alpha virt. eigenvalues --    1.21712   1.22155   1.23058   1.24115   1.24202
 Alpha virt. eigenvalues --    1.25514   1.26343   1.26893   1.27784   1.27999
 Alpha virt. eigenvalues --    1.28918   1.30010   1.31071   1.34254   1.34295
 Alpha virt. eigenvalues --    1.36581   1.37303   1.39072   1.39321   1.41385
 Alpha virt. eigenvalues --    1.41473   1.41864   1.41998   1.42874   1.45295
 Alpha virt. eigenvalues --    1.46142   1.46472   1.47207   1.47949   1.49722
 Alpha virt. eigenvalues --    1.49730   1.51035   1.52501   1.52842   1.53422
 Alpha virt. eigenvalues --    1.53802   1.54502   1.56231   1.56721   1.57194
 Alpha virt. eigenvalues --    1.58376   1.58947   1.60868   1.61010   1.62744
 Alpha virt. eigenvalues --    1.63765   1.63985   1.64435   1.64655   1.65630
 Alpha virt. eigenvalues --    1.67019   1.67840   1.69078   1.69947   1.70815
 Alpha virt. eigenvalues --    1.70819   1.72073   1.72347   1.73447   1.75009
 Alpha virt. eigenvalues --    1.75225   1.75876   1.79220   1.79323   1.80375
 Alpha virt. eigenvalues --    1.81542   1.82622   1.83943   1.85605   1.86748
 Alpha virt. eigenvalues --    1.87431   1.88522   1.89601   1.89894   1.90845
 Alpha virt. eigenvalues --    1.92015   1.92429   1.94170   1.94984   1.97351
 Alpha virt. eigenvalues --    2.01044   2.01117   2.02744   2.04454   2.05666
 Alpha virt. eigenvalues --    2.08130   2.08808   2.08881   2.12118   2.13760
 Alpha virt. eigenvalues --    2.15338   2.17365   2.18406   2.19790   2.20024
 Alpha virt. eigenvalues --    2.21228   2.21437   2.21630   2.23165   2.23760
 Alpha virt. eigenvalues --    2.26185   2.29263   2.30909   2.31698   2.34062
 Alpha virt. eigenvalues --    2.35446   2.35884   2.36371   2.37246   2.39284
 Alpha virt. eigenvalues --    2.41286   2.44446   2.45280   2.45792   2.49130
 Alpha virt. eigenvalues --    2.51601   2.52357   2.53233   2.54835   2.55064
 Alpha virt. eigenvalues --    2.58034   2.59430   2.59637   2.60410   2.61055
 Alpha virt. eigenvalues --    2.62027   2.63316   2.64062   2.65417   2.65496
 Alpha virt. eigenvalues --    2.67468   2.67769   2.68789   2.70168   2.70915
 Alpha virt. eigenvalues --    2.71184   2.72895   2.73997   2.74975   2.76074
 Alpha virt. eigenvalues --    2.76394   2.77592   2.77802   2.80202   2.80781
 Alpha virt. eigenvalues --    2.81349   2.82440   2.82524   2.83573   2.84280
 Alpha virt. eigenvalues --    2.85058   2.87296   2.87695   2.88551   2.88684
 Alpha virt. eigenvalues --    2.89118   2.89306   2.89878   2.90689   2.92968
 Alpha virt. eigenvalues --    2.93274   2.95118   2.95590   2.96583   2.96850
 Alpha virt. eigenvalues --    2.97413   2.98585   2.99046   3.00102   3.02200
 Alpha virt. eigenvalues --    3.02524   3.02759   3.03511   3.04757   3.06384
 Alpha virt. eigenvalues --    3.07179   3.09694   3.10265   3.10844   3.12315
 Alpha virt. eigenvalues --    3.12911   3.13031   3.14551   3.14580   3.16237
 Alpha virt. eigenvalues --    3.16908   3.17520   3.18243   3.19253   3.19517
 Alpha virt. eigenvalues --    3.21007   3.22352   3.23550   3.25076   3.26068
 Alpha virt. eigenvalues --    3.28358   3.28953   3.29753   3.30585   3.31055
 Alpha virt. eigenvalues --    3.31477   3.32400   3.32639   3.33627   3.34197
 Alpha virt. eigenvalues --    3.35365   3.37514   3.37980   3.39347   3.39575
 Alpha virt. eigenvalues --    3.41005   3.41313   3.42837   3.43110   3.44302
 Alpha virt. eigenvalues --    3.45322   3.46430   3.46755   3.47586   3.47674
 Alpha virt. eigenvalues --    3.49160   3.50303   3.50613   3.51870   3.52289
 Alpha virt. eigenvalues --    3.53129   3.54196   3.55071   3.55998   3.56293
 Alpha virt. eigenvalues --    3.59440   3.60189   3.62068   3.62686   3.64700
 Alpha virt. eigenvalues --    3.66435   3.66625   3.68713   3.73171   3.76874
 Alpha virt. eigenvalues --    3.77941   3.79208   3.80456   3.81753   3.84185
 Alpha virt. eigenvalues --    3.84939   3.86617   3.86883   3.87379   3.89370
 Alpha virt. eigenvalues --    3.92409   3.95356   3.96635   3.98991   3.99542
 Alpha virt. eigenvalues --    4.02608   4.03307   4.04060   4.04653   4.05155
 Alpha virt. eigenvalues --    4.09851   4.10309   4.10752   4.11748   4.12241
 Alpha virt. eigenvalues --    4.12926   4.14377   4.14962   4.16527   4.17104
 Alpha virt. eigenvalues --    4.18839   4.19880   4.20214   4.21934   4.22094
 Alpha virt. eigenvalues --    4.25046   4.26185   4.27006   4.28248   4.31611
 Alpha virt. eigenvalues --    4.31947   4.35710   4.35718   4.37392   4.40368
 Alpha virt. eigenvalues --    4.41544   4.47475   4.49792   4.51980   4.52955
 Alpha virt. eigenvalues --    4.55136   4.55312   4.55919   4.58720   4.62405
 Alpha virt. eigenvalues --    4.66624   4.68616   4.69209   4.69696   4.73115
 Alpha virt. eigenvalues --    4.74353   4.76198   4.78124   4.82902   4.84901
 Alpha virt. eigenvalues --    4.91643   4.96204   4.98250   5.00426   5.05061
 Alpha virt. eigenvalues --    5.06484   5.09395   5.15784   5.18293   5.18482
 Alpha virt. eigenvalues --    5.19651   5.22145   5.26156   5.27602   5.29125
 Alpha virt. eigenvalues --    5.31187   5.36342   5.39715   5.41658   5.50118
 Alpha virt. eigenvalues --    5.51138   5.57809   5.59914   5.67224   5.69369
 Alpha virt. eigenvalues --    5.74448   5.89084   5.96241   6.04865   6.25888
 Alpha virt. eigenvalues --    6.36227   6.38507   6.41340   6.47249   6.59077
 Alpha virt. eigenvalues --    6.69103   6.77620   6.80155   6.80361   7.02565
 Alpha virt. eigenvalues --    7.06799   7.08564   7.23873   7.85126  22.03426
 Alpha virt. eigenvalues --   22.57018  22.72617  22.75659  22.79268  22.82272
 Alpha virt. eigenvalues --   22.91445  22.96506  22.97163  23.08528  23.24360
 Alpha virt. eigenvalues --   23.42001  23.45210  23.97993  44.08294  44.20729
          Condensed to atoms (all electrons):
               1          2          3          4          5          6
     1  C    4.964213   0.406280  -0.013850  -0.058165   0.035923   0.422472
     2  C    0.406280   5.365866   0.261627  -0.094012  -0.172671   0.041656
     3  C   -0.013850   0.261627   5.494032   0.482223  -0.088025  -0.065973
     4  C   -0.058165  -0.094012   0.482223   5.438212   0.280051  -0.012028
     5  C    0.035923  -0.172671  -0.088025   0.280051   5.342664   0.405206
     6  C    0.422472   0.041656  -0.065973  -0.012028   0.405206   4.973523
     7  H    0.420317  -0.036643   0.006454   0.000316   0.005402  -0.034690
     8  H   -0.029000   0.422284  -0.043240   0.008048  -0.002190   0.005632
     9  H    0.005614  -0.002402   0.009460  -0.046700   0.424195  -0.029083
    10  H   -0.034571   0.005306   0.000234   0.005616  -0.035321   0.420078
    11  C   -0.009243   0.027064   0.071364   0.165608  -0.146036   0.019812
    12  O    0.000686  -0.000383   0.000576  -0.199117   0.047252   0.000134
    13  C    0.018082  -0.143688   0.110420   0.075220   0.021564  -0.008852
    14  C    0.003822  -0.008240  -0.166240   0.021874   0.071137  -0.006577
    15  C   -0.006562   0.077139   0.025425  -0.161875  -0.006852   0.004020
    16  C   -0.000165   0.002108  -0.003426   0.063446  -0.012090   0.000220
    17  C    0.000175  -0.011023   0.080121  -0.006949   0.002038  -0.000138
    18  C   -0.000003  -0.000098   0.003335  -0.004165   0.000066   0.000002
    19  H    0.000000  -0.000004  -0.000382   0.004971  -0.000357  -0.000001
    20  C    0.000001   0.000185  -0.006988   0.003243  -0.000111  -0.000002
    21  H   -0.000003  -0.000378   0.004816  -0.000426  -0.000006   0.000000
    22  H    0.000000   0.000002  -0.000024   0.000003   0.000000   0.000000
    23  Br   0.000000   0.000000  -0.000009   0.000075  -0.000003   0.000000
    24  O    0.000319   0.050959  -0.219494   0.000597  -0.000456   0.000760
               7          8          9         10         11         12
     1  C    0.420317  -0.029000   0.005614  -0.034571  -0.009243   0.000686
     2  C   -0.036643   0.422284  -0.002402   0.005306   0.027064  -0.000383
     3  C    0.006454  -0.043240   0.009460   0.000234   0.071364   0.000576
     4  C    0.000316   0.008048  -0.046700   0.005616   0.165608  -0.199117
     5  C    0.005402  -0.002190   0.424195  -0.035321  -0.146036   0.047252
     6  C   -0.034690   0.005632  -0.029083   0.420078   0.019812   0.000134
     7  H    0.467725  -0.003321  -0.000147  -0.003285   0.000091   0.000001
     8  H   -0.003321   0.458832   0.000040  -0.000145   0.000946   0.000007
     9  H   -0.000147   0.000040   0.463950  -0.003152  -0.022938   0.019575
    10  H   -0.003285  -0.000145  -0.003152   0.466956  -0.000274  -0.000111
    11  C    0.000091   0.000946  -0.022938  -0.000274   5.035367   0.722557
    12  O    0.000001   0.000007   0.019575  -0.000111   0.722557   7.928275
    13  C   -0.000371  -0.020528   0.001093   0.000108  -0.160472  -0.005918
    14  C    0.000007  -0.000421   0.004842  -0.000033   0.091587  -0.208003
    15  C   -0.000039   0.004714  -0.000470   0.000010   0.075868   0.000181
    16  C   -0.000001  -0.000007  -0.000435   0.000002  -0.108313   0.054632
    17  C    0.000003  -0.000385  -0.000011   0.000000   0.020595  -0.000558
    18  C    0.000000   0.000001  -0.000006   0.000000   0.007464   0.001236
    19  H    0.000000   0.000000  -0.000043   0.000000  -0.016006   0.020665
    20  C    0.000000  -0.000004   0.000001   0.000000  -0.003680   0.000779
    21  H    0.000000  -0.000044   0.000000   0.000000   0.000920   0.000007
    22  H    0.000000   0.000000   0.000000   0.000000   0.000188   0.000001
    23  Br   0.000000   0.000000   0.000000   0.000000  -0.001734   0.000053
    24  O   -0.000140   0.019755   0.000009   0.000001  -0.005877   0.000005
              13         14         15         16         17         18
     1  C    0.018082   0.003822  -0.006562  -0.000165   0.000175  -0.000003
     2  C   -0.143688  -0.008240   0.077139   0.002108  -0.011023  -0.000098
     3  C    0.110420  -0.166240   0.025425  -0.003426   0.080121   0.003335
     4  C    0.075220   0.021874  -0.161875   0.063446  -0.006949  -0.004165
     5  C    0.021564   0.071137  -0.006852  -0.012090   0.002038   0.000066
     6  C   -0.008852  -0.006577   0.004020   0.000220  -0.000138   0.000002
     7  H   -0.000371   0.000007  -0.000039  -0.000001   0.000003   0.000000
     8  H   -0.020528  -0.000421   0.004714  -0.000007  -0.000385   0.000001
     9  H    0.001093   0.004842  -0.000470  -0.000435  -0.000011  -0.000006
    10  H    0.000108  -0.000033   0.000010   0.000002   0.000000   0.000000
    11  C   -0.160472   0.091587   0.075868  -0.108313   0.020595   0.007464
    12  O   -0.005918  -0.208003   0.000181   0.054632  -0.000558   0.001236
    13  C    5.096002   0.077156   0.104130   0.021879  -0.146954  -0.008693
    14  C    0.077156   5.570512   0.500781   0.131397  -0.067719   0.044339
    15  C    0.104130   0.500781   5.500448  -0.076456   0.219265  -0.076233
    16  C    0.021879   0.131397  -0.076456   5.624576  -0.209957   0.301791
    17  C   -0.146954  -0.067719   0.219265  -0.209957   5.447881   0.097122
    18  C   -0.008693   0.044339  -0.076233   0.301791   0.097122   4.924944
    19  H    0.001028  -0.042198   0.007981   0.416583  -0.004801  -0.038332
    20  C    0.018105  -0.087941   0.015727   0.077769   0.311510   0.333155
    21  H   -0.019869   0.006779  -0.040368  -0.001347   0.417769   0.004144
    22  H   -0.000053  -0.001817   0.006714   0.013933  -0.034002  -0.048723
    23  Br  -0.000053   0.018335  -0.002918  -0.106156   0.020681   0.385139
    24  O    0.729712   0.000001  -0.222544  -0.000306   0.053519   0.000677
              19         20         21         22         23         24
     1  C    0.000000   0.000001  -0.000003   0.000000   0.000000   0.000319
     2  C   -0.000004   0.000185  -0.000378   0.000002   0.000000   0.050959
     3  C   -0.000382  -0.006988   0.004816  -0.000024  -0.000009  -0.219494
     4  C    0.004971   0.003243  -0.000426   0.000003   0.000075   0.000597
     5  C   -0.000357  -0.000111  -0.000006   0.000000  -0.000003  -0.000456
     6  C   -0.000001  -0.000002   0.000000   0.000000   0.000000   0.000760
     7  H    0.000000   0.000000   0.000000   0.000000   0.000000  -0.000140
     8  H    0.000000  -0.000004  -0.000044   0.000000   0.000000   0.019755
     9  H   -0.000043   0.000001   0.000000   0.000000   0.000000   0.000009
    10  H    0.000000   0.000000   0.000000   0.000000   0.000000   0.000001
    11  C   -0.016006  -0.003680   0.000920   0.000188  -0.001734  -0.005877
    12  O    0.020665   0.000779   0.000007   0.000001   0.000053   0.000005
    13  C    0.001028   0.018105  -0.019869  -0.000053  -0.000053   0.729712
    14  C   -0.042198  -0.087941   0.006779  -0.001817   0.018335   0.000001
    15  C    0.007981   0.015727  -0.040368   0.006714  -0.002918  -0.222544
    16  C    0.416583   0.077769  -0.001347   0.013933  -0.106156  -0.000306
    17  C   -0.004801   0.311510   0.417769  -0.034002   0.020681   0.053519
    18  C   -0.038332   0.333155   0.004144  -0.048723   0.385139   0.000677
    19  H    0.450330   0.012187   0.000041   0.000052  -0.005791   0.000008
    20  C    0.012187   5.158103  -0.025955   0.421810  -0.098572   0.000864
    21  H    0.000041  -0.025955   0.452752  -0.002803  -0.000190   0.020129
    22  H    0.000052   0.421810  -0.002803   0.458879  -0.006464  -0.000131
    23  Br  -0.005791  -0.098572  -0.000190  -0.006464  34.880650   0.000000
    24  O    0.000008   0.000864   0.020129  -0.000131   0.000000   7.995219
 Mulliken charges:
               1
     1  C   -0.126345
     2  C   -0.190933
     3  C    0.057564
     4  C    0.033937
     5  C   -0.171381
     6  C   -0.136171
     7  H    0.178321
     8  H    0.179024
     9  H    0.176609
    10  H    0.178581
    11  C    0.235142
    12  O   -0.382535
    13  C    0.240955
    14  C    0.046621
    15  C    0.051911
    16  C   -0.189680
    17  C   -0.188182
    18  C    0.072840
    19  H    0.194068
    20  C   -0.130187
    21  H    0.184033
    22  H    0.192435
    23  Br  -0.083043
    24  O   -0.423585
 Sum of Mulliken charges =   0.00000
 Mulliken charges with hydrogens summed into heavy atoms:
               1
     1  C    0.051977
     2  C   -0.011909
     3  C    0.057564
     4  C    0.033937
     5  C    0.005228
     6  C    0.042410
    11  C    0.235142
    12  O   -0.382535
    13  C    0.240955
    14  C    0.046621
    15  C    0.051911
    16  C    0.004387
    17  C   -0.004149
    18  C    0.072840
    20  C    0.062248
    23  Br  -0.083043
    24  O   -0.423585
 Electronic spatial extent (au):  <R**2>=           6183.9230
 Charge=              0.0000 electrons
 Dipole moment (field-independent basis, Debye):
    X=              2.1521    Y=              0.2568    Z=              0.0002  Tot=              2.1673
 Quadrupole moment (field-independent basis, Debye-Ang):
   XX=            -84.2209   YY=           -118.3286   ZZ=           -111.7603
   XY=            -11.1034   XZ=              0.0007   YZ=             -0.0007
 Traceless Quadrupole moment (field-independent basis, Debye-Ang):
   XX=             20.5490   YY=            -13.5587   ZZ=             -6.9904
   XY=            -11.1034   XZ=              0.0007   YZ=             -0.0007
 Octapole moment (field-independent basis, Debye-Ang**2):
  XXX=             22.5378  YYY=            -15.7216  ZZZ=             -0.0033  XYY=            -64.7639
  XXY=            -24.5455  XXZ=             -0.0018  XZZ=            -49.6782  YZZ=             -4.6198
  YYZ=             -0.0015  XYZ=              0.0002
 Hexadecapole moment (field-independent basis, Debye-Ang**3):
 XXXX=          -4944.8064 YYYY=          -1463.7596 ZZZZ=           -124.0178 XXXY=            -33.2585
 XXXZ=             -0.0592 YYYX=            -59.2216 YYYZ=              0.0284 ZZZX=             -0.0645
 ZZZY=              0.0319 XXYY=          -1127.7988 XXZZ=          -1077.8527 YYZZ=           -253.2595
 XXYZ=              0.0000 YYXZ=             -0.0130 ZZXY=             27.4427
 N-N= 1.374217861849D+03 E-N=-1.050263837029D+04  KE= 3.255417811007D+03
 Leave Link  601 at Tue Jan 14 17:56:44 2020, MaxMem=   183500800 cpu:         2.0
 (Enter E:\Gaussian\G09W\l9999.exe)
 1|1|UNPC-DESKTOP-K4OTQA5|SP|RM062X TD-FC|Gen|C14H7Br1O2|������|14-Jan-
 2020|0||#p td=(singlets,nstates=3,root=1) m062x/gen scrf=(solvent=acet
 onitrile) guess=save geom=connectivity empiricaldispersion=gd3||2-BrAQ
  excited singlet energy||0,1|C,0,5.06551,0.07016,0.000013|C,0,4.038987
 ,0.992097,-0.000006|C,0,2.6953,0.556355,0.000059|C,0,2.402449,-0.82472
 7,0.000142|C,0,3.466794,-1.741586,0.000157|C,0,4.779243,-1.306492,0.00
 0092|H,0,6.09457,0.410908,-0.000034|H,0,4.247459,2.055626,-0.000073|H,
 0,3.22164,-2.797083,0.000224|H,0,5.588088,-2.028037,0.000106|C,0,1.025
 405,-1.333101,0.000238|O,0,0.766987,-2.547012,0.000116|C,0,1.623961,1.
 532342,0.000023|C,0,-0.03177,-0.313209,0.000088|C,0,0.255697,1.069062,
 0.000007|C,0,-1.370837,-0.73444,0.000054|C,0,-0.804033,2.004428,-0.000
 11|C,0,-2.385174,0.200552,-0.00006|H,0,-1.57094,-1.798242,0.000124|C,0
 ,-2.114511,1.580658,-0.000142|H,0,-0.574913,3.063671,-0.000176|H,0,-2.
 923741,2.299262,-0.000228|Br,0,-4.20512,-0.38756,-0.000104|O,0,1.88487
 8,2.77775,-0.00007||Version=IA32W-G09RevD.01|State=1-A|HF=-3262.350751
 |RMSD=5.770e-009|PG=C01 [X(C14H7Br1O2)]||@


 OUR LITTLE SYSTEMS HAVE THEIR DAY,    
   THEY HAVE THEIR DAY AND CEASE TO BE.
   THEY ARE BUT BROKEN LIGHTS OF THEE, 
 AND THOU, OH LORD, ART MORE THAN THEY.
          -------------------          
 LET KNOWLEDGE GROW FROM MORE TO MORE, 
   BUT MORE OF REVERENCE IN US DWELL.  
   THAT MIND AND SOUL, ACCORDING WELL, 
 MAY MAKE ONE MUSIC AS BEFORE.....     
          -------------------          
                    LORD TENNYSON      
 Job cpu time:       0 days  6 hours 25 minutes 40.0 seconds.
 File lengths (MBytes):  RWF=    533 Int=      0 D2E=      0 Chk=     46 Scr=      1
 Normal termination of Gaussian 09 at Tue Jan 14 17:56:48 2020.
