# Supplementary material for: 2-Bromoanthraquinone as a highly efficient photocatalyst for the oxidation of sec-aromatic alcohols: experimental and DFT study
Source: Royal Society of Chemistry journal article supplement (doi:10.1039/d0ra06414a), 2020-01-01
Supplement: d0ra06414a13.out [file d0ra06414a13.out]

 Entering Link 1 = E:\Gaussian\G09W\l1.exe PID=    111448.
  
 Copyright (c) 1988,1990,1992,1993,1995,1998,2003,2009,2013,
            Gaussian, Inc.  All Rights Reserved.
  
 This is part of the Gaussian(R) 09 program.  It is based on
 the Gaussian(R) 03 system (copyright 2003, Gaussian, Inc.),
 the Gaussian(R) 98 system (copyright 1998, Gaussian, Inc.),
 the Gaussian(R) 94 system (copyright 1995, Gaussian, Inc.),
 the Gaussian 92(TM) system (copyright 1992, Gaussian, Inc.),
 the Gaussian 90(TM) system (copyright 1990, Gaussian, Inc.),
 the Gaussian 88(TM) system (copyright 1988, Gaussian, Inc.),
 the Gaussian 86(TM) system (copyright 1986, Carnegie Mellon
 University), and the Gaussian 82(TM) system (copyright 1983,
 Carnegie Mellon University). Gaussian is a federally registered
 trademark of Gaussian, Inc.
  
 This software contains proprietary and confidential information,
 including trade secrets, belonging to Gaussian, Inc.
  
 This software is provided under written license and may be
 used, copied, transmitted, or stored only in accord with that
 written license.
  
 The following legend is applicable only to US Government
 contracts under FAR:
  
                    RESTRICTED RIGHTS LEGEND
  
 Use, reproduction and disclosure by the US Government is
 subject to restrictions as set forth in subparagraphs (a)
 and (c) of the Commercial Computer Software - Restricted
 Rights clause in FAR 52.227-19.
  
 Gaussian, Inc.
 340 Quinnipiac St., Bldg. 40, Wallingford CT 06492
  
  
 ---------------------------------------------------------------
 Warning -- This program may not be used in any manner that
 competes with the business of Gaussian, Inc. or will provide
 assistance to any competitor of Gaussian, Inc.  The licensee
 of this program is prohibited from giving any competitor of
 Gaussian, Inc. access to this program.  By using this program,
 the user acknowledges that Gaussian, Inc. is engaged in the
 business of creating and licensing software in the field of
 computational chemistry and represents and warrants to the
 licensee that it is not a competitor of Gaussian, Inc. and that
 it will not use this program in any manner prohibited above.
 ---------------------------------------------------------------
  

 Cite this work as:
 Gaussian 09, Revision D.01,
 M. J. Frisch, G. W. Trucks, H. B. Schlegel, G. E. Scuseria, 
 M. A. Robb, J. R. Cheeseman, G. Scalmani, V. Barone, B. Mennucci, 
 G. A. Petersson, H. Nakatsuji, M. Caricato, X. Li, H. P. Hratchian, 
 A. F. Izmaylov, J. Bloino, G. Zheng, J. L. Sonnenberg, M. Hada, 
 M. Ehara, K. Toyota, R. Fukuda, J. Hasegawa, M. Ishida, T. Nakajima, 
 Y. Honda, O. Kitao, H. Nakai, T. Vreven, J. A. Montgomery, Jr., 
 J. E. Peralta, F. Ogliaro, M. Bearpark, J. J. Heyd, E. Brothers, 
 K. N. Kudin, V. N. Staroverov, T. Keith, R. Kobayashi, J. Normand, 
 K. Raghavachari, A. Rendell, J. C. Burant, S. S. Iyengar, J. Tomasi, 
 M. Cossi, N. Rega, J. M. Millam, M. Klene, J. E. Knox, J. B. Cross, 
 V. Bakken, C. Adamo, J. Jaramillo, R. Gomperts, R. E. Stratmann, 
 O. Yazyev, A. J. Austin, R. Cammi, C. Pomelli, J. W. Ochterski, 
 R. L. Martin, K. Morokuma, V. G. Zakrzewski, G. A. Voth, 
 P. Salvador, J. J. Dannenberg, S. Dapprich, A. D. Daniels, 
 O. Farkas, J. B. Foresman, J. V. Ortiz, J. Cioslowski, 
 and D. J. Fox, Gaussian, Inc., Wallingford CT, 2013.
 
 ******************************************
 Gaussian 09:  IA32W-G09RevD.01 24-Apr-2013
                11-Jan-2020 
 ******************************************
 %nprocshared=2
 Will use up to    2 processors via shared memory.
 %mem=1400MB
 %chk=E:\Gaussian file\2-BrAQ excited singlet opt.chk
 ----------------------------------------------------------------------
 #p opt td=(singlets,nstates=5,root=1) b3lyp/6-311g(d) scrf=(solvent=ac
 etonitrile) guess=save geom=connectivity empiricaldispersion=gd3bj
 ----------------------------------------------------------------------
 1/14=-1,18=20,19=15,26=3,38=1,57=2/1,3;
 2/9=110,12=2,17=6,18=5,40=1/2;
 3/5=4,6=6,7=1,11=9,16=1,25=1,30=1,70=2201,71=1,72=2,74=-5,124=41/1,2,8,3;
 4//1;
 5/5=2,38=5,53=2/2;
 8/6=1,10=2,107=1,108=5/1;
 9/8=1,15=2,41=5,42=1,48=1,70=2/14;
 10/5=4/2;
 6/7=2,8=2,9=2,10=2/1;
 7/12=6,13=5,14=1/1,2,3,16;
 1/14=-1,18=20,19=15,26=3/3(2);
 2/9=110/2;
 99//99;
 2/9=110/2;
 3/5=4,6=6,7=1,11=9,16=1,25=1,30=1,70=2205,71=1,72=2,74=-5,124=41/1,2,8,3;
 4/5=5,16=3,69=1/1;
 5/5=2,38=5,53=2/2;
 8/6=1,10=2,107=1,108=5/1;
 9/8=1,15=2,41=5,42=1,48=1,49=4,70=2/14;
 10/5=4/2;
 7/12=6,13=5,14=1/1,2,3,16;
 1/14=-1,18=20,19=15,26=3/3(-8);
 2/9=110/2;
 6/7=2,8=2,9=2,10=2/1;
 99//99;
 Leave Link    1 at Sat Jan 11 21:14:23 2020, MaxMem=   183500800 cpu:         0.0
 (Enter E:\Gaussian\G09W\l101.exe)
 --------------------------
 2-BrAQ excited singlet opt
 --------------------------
 Symbolic Z-matrix:
 Charge =  0 Multiplicity = 1
 C                    -3.69658   0.25641   0. 
 C                    -2.66787   1.17788   0.00002 
 C                    -1.32354   0.74117   0. 
 C                    -1.03119  -0.64104  -0.00009 
 C                    -2.09834  -1.55813  -0.00009 
 C                    -3.41129  -1.12097  -0.00006 
 H                    -4.72563   0.59874   0.00004 
 H                    -2.87646   2.24191   0.00007 
 H                    -1.86047  -2.61576  -0.00014 
 H                    -4.22086  -1.84247  -0.00008 
 C                     0.34747  -1.14696  -0.00014 
 O                     0.60599  -2.36453  -0.00029 
 C                    -0.25055   1.71921   0.00005 
 C                     1.40771  -0.12929  -0.00004 
 C                     1.11986   1.25352   0.00006 
 C                     2.7495   -0.55007   0.00002 
 C                     2.1802    2.18915   0.00012 
 C                     3.76433   0.38582   0.0001 
 H                     2.95458  -1.61344  -0.00003 
 C                     3.49238   1.76592   0.00015 
 H                     1.9517    3.24909   0.00017 
 H                     4.29987   2.48734   0.00022 
 Br                    5.58556  -0.20314   0.00014 
 O                    -0.51041   2.96376   0.00018 
 
 NAtoms=     24 NQM=       24 NQMF=       0 NMMI=      0 NMMIF=      0
                NMic=       0 NMicF=      0.
                    Isotopes and Nuclear Properties:
 (Nuclear quadrupole moments (NQMom) in fm**2, nuclear magnetic moments (NMagM)
  in nuclear magnetons)

  Atom         1           2           3           4           5           6           7           8           9          10
 IAtWgt=          12          12          12          12          12          12           1           1           1           1
 AtmWgt=  12.0000000  12.0000000  12.0000000  12.0000000  12.0000000  12.0000000   1.0078250   1.0078250   1.0078250   1.0078250
 NucSpn=           0           0           0           0           0           0           1           1           1           1
 AtZEff=   0.0000000   0.0000000   0.0000000   0.0000000   0.0000000   0.0000000   0.0000000   0.0000000   0.0000000   0.0000000
 NQMom=    0.0000000   0.0000000   0.0000000   0.0000000   0.0000000   0.0000000   0.0000000   0.0000000   0.0000000   0.0000000
 NMagM=    0.0000000   0.0000000   0.0000000   0.0000000   0.0000000   0.0000000   2.7928460   2.7928460   2.7928460   2.7928460
 AtZNuc=   6.0000000   6.0000000   6.0000000   6.0000000   6.0000000   6.0000000   1.0000000   1.0000000   1.0000000   1.0000000

  Atom        11          12          13          14          15          16          17          18          19          20
 IAtWgt=          12          16          12          12          12          12          12          12           1          12
 AtmWgt=  12.0000000  15.9949146  12.0000000  12.0000000  12.0000000  12.0000000  12.0000000  12.0000000   1.0078250  12.0000000
 NucSpn=           0           0           0           0           0           0           0           0           1           0
 AtZEff=   0.0000000   0.0000000   0.0000000   0.0000000   0.0000000   0.0000000   0.0000000   0.0000000   0.0000000   0.0000000
 NQMom=    0.0000000   0.0000000   0.0000000   0.0000000   0.0000000   0.0000000   0.0000000   0.0000000   0.0000000   0.0000000
 NMagM=    0.0000000   0.0000000   0.0000000   0.0000000   0.0000000   0.0000000   0.0000000   0.0000000   2.7928460   0.0000000
 AtZNuc=   6.0000000   8.0000000   6.0000000   6.0000000   6.0000000   6.0000000   6.0000000   6.0000000   1.0000000   6.0000000

  Atom        21          22          23          24
 IAtWgt=           1           1          79          16
 AtmWgt=   1.0078250   1.0078250  78.9183361  15.9949146
 NucSpn=           1           1           3           0
 AtZEff=   0.0000000   0.0000000   0.0000000   0.0000000
 NQMom=    0.0000000   0.0000000  31.3000000   0.0000000
 NMagM=    2.7928460   2.7928460   2.1063990   0.0000000
 AtZNuc=   1.0000000   1.0000000  35.0000000   8.0000000
 Leave Link  101 at Sat Jan 11 21:14:24 2020, MaxMem=   183500800 cpu:         0.0
 (Enter E:\Gaussian\G09W\l103.exe)

 GradGradGradGradGradGradGradGradGradGradGradGradGradGradGradGradGradGrad
 Berny optimization.
 Initialization pass.
                           ----------------------------
                           !    Initial Parameters    !
                           ! (Angstroms and Degrees)  !
 --------------------------                            --------------------------
 ! Name  Definition              Value          Derivative Info.                !
 --------------------------------------------------------------------------------
 ! R1    R(1,2)                  1.3811         estimate D2E/DX2                !
 ! R2    R(1,6)                  1.4066         estimate D2E/DX2                !
 ! R3    R(1,7)                  1.0845         estimate D2E/DX2                !
 ! R4    R(2,3)                  1.4135         estimate D2E/DX2                !
 ! R5    R(2,8)                  1.0843         estimate D2E/DX2                !
 ! R6    R(3,4)                  1.4128         estimate D2E/DX2                !
 ! R7    R(3,13)                 1.4519         estimate D2E/DX2                !
 ! R8    R(4,5)                  1.4071         estimate D2E/DX2                !
 ! R9    R(4,11)                 1.4686         estimate D2E/DX2                !
 ! R10   R(5,6)                  1.3838         estimate D2E/DX2                !
 ! R11   R(5,9)                  1.084          estimate D2E/DX2                !
 ! R12   R(6,10)                 1.0844         estimate D2E/DX2                !
 ! R13   R(11,12)                1.2447         estimate D2E/DX2                !
 ! R14   R(11,14)                1.4696         estimate D2E/DX2                !
 ! R15   R(13,15)                1.4474         estimate D2E/DX2                !
 ! R16   R(13,24)                1.2714         estimate D2E/DX2                !
 ! R17   R(14,15)                1.4124         estimate D2E/DX2                !
 ! R18   R(14,16)                1.4062         estimate D2E/DX2                !
 ! R19   R(15,17)                1.4141         estimate D2E/DX2                !
 ! R20   R(16,18)                1.3805         estimate D2E/DX2                !
 ! R21   R(16,19)                1.083          estimate D2E/DX2                !
 ! R22   R(17,20)                1.3788         estimate D2E/DX2                !
 ! R23   R(17,21)                1.0843         estimate D2E/DX2                !
 ! R24   R(18,20)                1.4066         estimate D2E/DX2                !
 ! R25   R(18,23)                1.9141         estimate D2E/DX2                !
 ! R26   R(20,22)                1.0828         estimate D2E/DX2                !
 ! A1    A(2,1,6)              120.1507         estimate D2E/DX2                !
 ! A2    A(2,1,7)              119.7471         estimate D2E/DX2                !
 ! A3    A(6,1,7)              120.1022         estimate D2E/DX2                !
 ! A4    A(1,2,3)              120.1509         estimate D2E/DX2                !
 ! A5    A(1,2,8)              120.7612         estimate D2E/DX2                !
 ! A6    A(3,2,8)              119.0879         estimate D2E/DX2                !
 ! A7    A(2,3,4)              119.9391         estimate D2E/DX2                !
 ! A8    A(2,3,13)             119.6538         estimate D2E/DX2                !
 ! A9    A(4,3,13)             120.4071         estimate D2E/DX2                !
 ! A10   A(3,4,5)              118.7328         estimate D2E/DX2                !
 ! A11   A(3,4,11)             122.0942         estimate D2E/DX2                !
 ! A12   A(5,4,11)             119.173          estimate D2E/DX2                !
 ! A13   A(4,5,6)              120.9089         estimate D2E/DX2                !
 ! A14   A(4,5,9)              118.0003         estimate D2E/DX2                !
 ! A15   A(6,5,9)              121.0908         estimate D2E/DX2                !
 ! A16   A(1,6,5)              120.1176         estimate D2E/DX2                !
 ! A17   A(1,6,10)             120.0059         estimate D2E/DX2                !
 ! A18   A(5,6,10)             119.8765         estimate D2E/DX2                !
 ! A19   A(4,11,12)            122.1386         estimate D2E/DX2                !
 ! A20   A(4,11,14)            116.0219         estimate D2E/DX2                !
 ! A21   A(12,11,14)           121.8395         estimate D2E/DX2                !
 ! A22   A(3,13,15)            118.8813         estimate D2E/DX2                !
 ! A23   A(3,13,24)            120.5557         estimate D2E/DX2                !
 ! A24   A(15,13,24)           120.563          estimate D2E/DX2                !
 ! A25   A(11,14,15)           122.0674         estimate D2E/DX2                !
 ! A26   A(11,14,16)           118.7623         estimate D2E/DX2                !
 ! A27   A(15,14,16)           119.1703         estimate D2E/DX2                !
 ! A28   A(13,15,14)           120.5281         estimate D2E/DX2                !
 ! A29   A(13,15,17)           119.8058         estimate D2E/DX2                !
 ! A30   A(14,15,17)           119.6661         estimate D2E/DX2                !
 ! A31   A(14,16,18)           119.906          estimate D2E/DX2                !
 ! A32   A(14,16,19)           118.3271         estimate D2E/DX2                !
 ! A33   A(18,16,19)           121.7669         estimate D2E/DX2                !
 ! A34   A(15,17,20)           120.6981         estimate D2E/DX2                !
 ! A35   A(15,17,21)           119.2597         estimate D2E/DX2                !
 ! A36   A(20,17,21)           120.0422         estimate D2E/DX2                !
 ! A37   A(16,18,20)           121.5356         estimate D2E/DX2                !
 ! A38   A(16,18,23)           119.3967         estimate D2E/DX2                !
 ! A39   A(20,18,23)           119.0677         estimate D2E/DX2                !
 ! A40   A(17,20,18)           119.0239         estimate D2E/DX2                !
 ! A41   A(17,20,22)           120.3453         estimate D2E/DX2                !
 ! A42   A(18,20,22)           120.6307         estimate D2E/DX2                !
 ! D1    D(6,1,2,3)             -0.001          estimate D2E/DX2                !
 ! D2    D(6,1,2,8)           -179.9996         estimate D2E/DX2                !
 ! D3    D(7,1,2,3)            179.9982         estimate D2E/DX2                !
 ! D4    D(7,1,2,8)             -0.0003         estimate D2E/DX2                !
 ! D5    D(2,1,6,5)              0.0004         estimate D2E/DX2                !
 ! D6    D(2,1,6,10)          -179.9998         estimate D2E/DX2                !
 ! D7    D(7,1,6,5)           -179.9989         estimate D2E/DX2                !
 ! D8    D(7,1,6,10)             0.0009         estimate D2E/DX2                !
 ! D9    D(1,2,3,4)              0.0025         estimate D2E/DX2                !
 ! D10   D(1,2,3,13)          -179.9988         estimate D2E/DX2                !
 ! D11   D(8,2,3,4)           -179.9989         estimate D2E/DX2                !
 ! D12   D(8,2,3,13)            -0.0002         estimate D2E/DX2                !
 ! D13   D(2,3,4,5)             -0.0032         estimate D2E/DX2                !
 ! D14   D(2,3,4,11)           179.9986         estimate D2E/DX2                !
 ! D15   D(13,3,4,5)           179.9981         estimate D2E/DX2                !
 ! D16   D(13,3,4,11)           -0.0001         estimate D2E/DX2                !
 ! D17   D(2,3,13,15)          179.9989         estimate D2E/DX2                !
 ! D18   D(2,3,13,24)            0.0037         estimate D2E/DX2                !
 ! D19   D(4,3,13,15)           -0.0024         estimate D2E/DX2                !
 ! D20   D(4,3,13,24)         -179.9976         estimate D2E/DX2                !
 ! D21   D(3,4,5,6)              0.0026         estimate D2E/DX2                !
 ! D22   D(3,4,5,9)           -179.9987         estimate D2E/DX2                !
 ! D23   D(11,4,5,6)          -179.9992         estimate D2E/DX2                !
 ! D24   D(11,4,5,9)            -0.0004         estimate D2E/DX2                !
 ! D25   D(3,4,11,12)         -179.9958         estimate D2E/DX2                !
 ! D26   D(3,4,11,14)            0.0022         estimate D2E/DX2                !
 ! D27   D(5,4,11,12)            0.006          estimate D2E/DX2                !
 ! D28   D(5,4,11,14)         -179.9959         estimate D2E/DX2                !
 ! D29   D(4,5,6,1)             -0.0012         estimate D2E/DX2                !
 ! D30   D(4,5,6,10)           179.999          estimate D2E/DX2                !
 ! D31   D(9,5,6,1)           -179.9999         estimate D2E/DX2                !
 ! D32   D(9,5,6,10)             0.0003         estimate D2E/DX2                !
 ! D33   D(4,11,14,15)          -0.002          estimate D2E/DX2                !
 ! D34   D(4,11,14,16)         179.9955         estimate D2E/DX2                !
 ! D35   D(12,11,14,15)        179.9961         estimate D2E/DX2                !
 ! D36   D(12,11,14,16)         -0.0064         estimate D2E/DX2                !
 ! D37   D(3,13,15,14)           0.0027         estimate D2E/DX2                !
 ! D38   D(3,13,15,17)        -179.9991         estimate D2E/DX2                !
 ! D39   D(24,13,15,14)        179.9978         estimate D2E/DX2                !
 ! D40   D(24,13,15,17)         -0.0039         estimate D2E/DX2                !
 ! D41   D(11,14,15,13)         -0.0004         estimate D2E/DX2                !
 ! D42   D(11,14,15,17)       -179.9986         estimate D2E/DX2                !
 ! D43   D(16,14,15,13)       -179.9979         estimate D2E/DX2                !
 ! D44   D(16,14,15,17)          0.0038         estimate D2E/DX2                !
 ! D45   D(11,14,16,18)        179.9994         estimate D2E/DX2                !
 ! D46   D(11,14,16,19)          0.0005         estimate D2E/DX2                !
 ! D47   D(15,14,16,18)         -0.003          estimate D2E/DX2                !
 ! D48   D(15,14,16,19)        179.9981         estimate D2E/DX2                !
 ! D49   D(13,15,17,20)        179.9991         estimate D2E/DX2                !
 ! D50   D(13,15,17,21)          0.0005         estimate D2E/DX2                !
 ! D51   D(14,15,17,20)         -0.0026         estimate D2E/DX2                !
 ! D52   D(14,15,17,21)        179.9987         estimate D2E/DX2                !
 ! D53   D(14,16,18,20)          0.001          estimate D2E/DX2                !
 ! D54   D(14,16,18,23)       -179.9991         estimate D2E/DX2                !
 ! D55   D(19,16,18,20)        179.9998         estimate D2E/DX2                !
 ! D56   D(19,16,18,23)         -0.0003         estimate D2E/DX2                !
 ! D57   D(15,17,20,18)          0.0006         estimate D2E/DX2                !
 ! D58   D(15,17,20,22)       -179.9985         estimate D2E/DX2                !
 ! D59   D(21,17,20,18)        179.9992         estimate D2E/DX2                !
 ! D60   D(21,17,20,22)          0.0002         estimate D2E/DX2                !
 ! D61   D(16,18,20,17)          0.0003         estimate D2E/DX2                !
 ! D62   D(16,18,20,22)        179.9993         estimate D2E/DX2                !
 ! D63   D(23,18,20,17)       -179.9996         estimate D2E/DX2                !
 ! D64   D(23,18,20,22)         -0.0006         estimate D2E/DX2                !
 --------------------------------------------------------------------------------
 Trust Radius=3.00D-01 FncErr=1.00D-07 GrdErr=1.00D-06
 Number of steps in this run=    142 maximum allowed number of steps=    144.
 GradGradGradGradGradGradGradGradGradGradGradGradGradGradGradGradGradGrad

 Leave Link  103 at Sat Jan 11 21:14:25 2020, MaxMem=   183500800 cpu:         0.0
 (Enter E:\Gaussian\G09W\l202.exe)
                          Input orientation:                          
 ---------------------------------------------------------------------
 Center     Atomic      Atomic             Coordinates (Angstroms)
 Number     Number       Type             X           Y           Z
 ---------------------------------------------------------------------
      1          6           0       -3.696581    0.256410    0.000000
      2          6           0       -2.667874    1.177880    0.000020
      3          6           0       -1.323535    0.741169    0.000003
      4          6           0       -1.031185   -0.641037   -0.000087
      5          6           0       -2.098337   -1.558135   -0.000089
      6          6           0       -3.411292   -1.120973   -0.000059
      7          1           0       -4.725634    0.598737    0.000042
      8          1           0       -2.876462    2.241908    0.000072
      9          1           0       -1.860473   -2.615763   -0.000136
     10          1           0       -4.220863   -1.842472   -0.000078
     11          6           0        0.347475   -1.146964   -0.000138
     12          8           0        0.605986   -2.364527   -0.000294
     13          6           0       -0.250548    1.719214    0.000050
     14          6           0        1.407715   -0.129289   -0.000038
     15          6           0        1.119862    1.253515    0.000057
     16          6           0        2.749503   -0.550068    0.000016
     17          6           0        2.180196    2.189154    0.000122
     18          6           0        3.764330    0.385823    0.000097
     19          1           0        2.954582   -1.613437   -0.000026
     20          6           0        3.492385    1.765917    0.000148
     21          1           0        1.951697    3.249093    0.000174
     22          1           0        4.299872    2.487335    0.000223
     23         35           0        5.585559   -0.203138    0.000144
     24          8           0       -0.510412    2.963764    0.000177
 ---------------------------------------------------------------------
                    Distance matrix (angstroms):
                    1          2          3          4          5
     1  C    0.000000
     2  C    1.381067   0.000000
     3  C    2.422053   1.413493   0.000000
     4  C    2.812427   2.446878   1.412785   0.000000
     5  C    2.418048   2.794665   2.426338   1.407083   0.000000
     6  C    1.406618   2.416070   2.797553   2.428013   1.383821
     7  H    1.084499   2.137705   3.405079   3.896921   3.399233
     8  H    2.148208   1.084281   2.159583   3.422926   3.878892
     9  H    3.408910   3.878611   3.399602   2.141789   1.084046
    10  H    2.163372   3.396219   3.881972   3.408444   2.141486
    11  C    4.280636   3.807523   2.521373   1.468559   2.480133
    12  O    5.037995   4.823568   3.656282   2.377130   2.821991
    13  C    3.743653   2.477198   1.451852   2.485997   3.762358
    14  C    5.118848   4.280084   2.866605   2.492011   3.786027
    15  C    4.918571   3.788491   2.496535   2.866414   4.273427
    16  C    6.496338   5.686280   4.272813   3.781782   4.951540
    17  C    6.186437   4.952419   3.791146   4.280531   5.687532
    18  C    7.462033   6.480787   5.100259   4.904223   6.176555
    19  H    6.909001   6.277218   4.883283   4.102670   5.053222
    20  C    7.345736   6.188261   4.923738   5.124072   6.504267
    21  H    6.392120   5.062644   4.125146   4.902111   6.285874
    22  H    8.301824   7.089722   5.888277   6.181171   7.569868
    23  Br   9.293509   8.368176   6.973327   6.631218   7.802453
    24  O    4.181081   2.800718   2.366664   3.642224   4.792606
                    6          7          8          9         10
     6  C    0.000000
     7  H    2.164462   0.000000
     8  H    3.405145   2.473752   0.000000
     9  H    2.153935   4.306061   4.962782   0.000000
    10  H    1.084420   2.492849   4.299950   2.483832   0.000000
    11  C    3.758857   5.365064   4.677416   2.651868   4.620979
    12  O    4.205348   6.099763   5.774659   2.479222   4.854999
    13  C    4.249349   4.613227   2.677430   4.624271   5.333761
    14  C    4.919986   6.176406   4.896606   4.106532   5.883527
    15  C    5.115618   5.882054   4.116737   4.884026   6.173207
    16  C    6.187191   7.562898   6.280654   5.051631   7.089169
    17  C    6.497821   7.086601   5.056933   6.278076   7.564890
    18  C    7.332120   8.492633   6.895301   6.375573   8.290272
    19  H    6.384894   7.992461   6.990333   4.918273   7.179099
    20  C    7.482973   8.300491   6.386609   6.917529   8.515554
    21  H    6.918029   7.184089   4.932093   6.994939   8.001533
    22  H    8.513632   9.220985   7.180530   7.999466   9.557727
    23  Br   9.043547  10.342326   8.808181   7.827142   9.942501
    24  O    5.010008   4.833368   2.473716   5.740539   6.071849
                   11         12         13         14         15
    11  C    0.000000
    12  O    1.244704   0.000000
    13  C    2.927902   4.172600   0.000000
    14  C    1.469616   2.374670   2.483304   0.000000
    15  C    2.521682   3.654353   1.447377   1.412447   0.000000
    16  C    2.475080   2.808367   3.761642   1.406218   2.430770
    17  C    3.806383   4.818106   2.475754   2.443748   1.414118
    18  C    3.744908   4.188026   4.230506   2.412255   2.783182
    19  H    2.648510   2.465774   4.623789   2.143710   3.403764
    20  C    4.286646   5.039034   3.743224   2.817384   2.427225
    21  H    4.679620   5.772666   2.681495   3.421897   2.162009
    22  H    5.369318   6.097980   4.614795   3.900166   3.410979
    23  Br   5.322437   5.428421   6.144557   4.178497   4.697264
    24  O    4.199292   5.443990   1.271391   3.639531   2.362783
                   16         17         18         19         20
    16  C    0.000000
    17  C    2.797758   0.000000
    18  C    1.380495   2.400309   0.000000
    19  H    1.082964   3.880641   2.157019   0.000000
    20  C    2.432213   1.378757   1.406632   3.421880   0.000000
    21  H    3.882025   1.084289   3.388798   4.964874   2.138581
    22  H    3.410200   2.140546   2.168677   4.315801   1.082811
    23  Br   2.857197   4.161677   1.914093   2.985127   2.873770
    24  O    4.793126   2.799891   4.991913   5.740815   4.178184
                   21         22         23         24
    21  H    0.000000
    22  H    2.468644   0.000000
    23  Br   5.012270   2.981885   0.000000
    24  O    2.478587   4.833820   6.869507   0.000000
 Stoichiometry    C14H7BrO2
 Framework group  C1[X(C14H7BrO2)]
 Deg. of freedom    66
 Full point group                 C1      NOp   1
 Largest Abelian subgroup         C1      NOp   1
 Largest concise Abelian subgroup C1      NOp   1
                         Standard orientation:                         
 ---------------------------------------------------------------------
 Center     Atomic      Atomic             Coordinates (Angstroms)
 Number     Number       Type             X           Y           Z
 ---------------------------------------------------------------------
      1          6           0        5.071754    0.071585    0.000035
      2          6           0        4.043047    0.993055    0.000015
      3          6           0        2.698708    0.556344    0.000032
      4          6           0        2.406358   -0.825862    0.000122
      5          6           0        3.473510   -1.742960    0.000124
      6          6           0        4.786465   -1.305798    0.000094
      7          1           0        6.100807    0.413912   -0.000007
      8          1           0        4.251635    2.057083   -0.000037
      9          1           0        3.235646   -2.800588    0.000171
     10          1           0        5.596036   -2.027297    0.000113
     11          6           0        1.027698   -1.331789    0.000173
     12          8           0        0.769187   -2.549352    0.000329
     13          6           0        1.625721    1.534389   -0.000015
     14          6           0       -0.032542   -0.314114    0.000073
     15          6           0        0.255311    1.068690   -0.000022
     16          6           0       -1.374330   -0.734893    0.000019
     17          6           0       -0.805023    2.004329   -0.000087
     18          6           0       -2.389157    0.200998   -0.000062
     19          1           0       -1.579409   -1.798262    0.000061
     20          6           0       -2.117212    1.581092   -0.000113
     21          1           0       -0.576524    3.064268   -0.000139
     22          1           0       -2.924699    2.302510   -0.000188
     23         35           0       -4.210386   -0.387963   -0.000109
     24          8           0        1.885585    2.778939   -0.000142
 ---------------------------------------------------------------------
 Rotational constants (GHZ):      1.0031543      0.1776354      0.1509123
 Leave Link  202 at Sat Jan 11 21:14:25 2020, MaxMem=   183500800 cpu:         0.0
 (Enter E:\Gaussian\G09W\l301.exe)
 Standard basis: 6-311G(d) (5D, 7F)
 Ernie: Thresh=  0.10000D-02 Tol=  0.10000D-05 Strict=F.
 There are   372 symmetry adapted cartesian basis functions of A   symmetry.
 There are   353 symmetry adapted basis functions of A   symmetry.
   353 basis functions,   637 primitive gaussians,   372 cartesian basis functions
    71 alpha electrons       71 beta electrons
       nuclear repulsion energy      1372.8291820184 Hartrees.
 IExCor=  402 DFT=T Ex+Corr=B3LYP ExCW=0 ScaHFX=  0.200000
 ScaDFX=  0.800000  0.720000  1.000000  0.810000 ScalE2=  1.000000  1.000000
 IRadAn=      0 IRanWt=     -1 IRanGd=            0 ICorTp=0 IEmpDi=141
 NAtoms=   24 NActive=   24 NUniq=   24 SFac= 1.00D+00 NAtFMM=   60 NAOKFM=F Big=F
 Integral buffers will be    262144 words long.
 Regular integral format.
 Two-electron integral symmetry is turned on.
 R6Disp:  Grimme-D3(BJ) Dispersion energy=       -0.0619868512 Hartrees.
 Nuclear repulsion after empirical dispersion term =     1372.7671951673 Hartrees.
 ------------------------------------------------------------------------------
 Polarizable Continuum Model (PCM)
 =================================
 Model                : PCM (using non-symmetric T matrix).
 Atomic radii         : UFF (Universal Force Field).
 Polarization charges : Total charges.
 Charge compensation  : None.
 Solution method      : On-the-fly selection.
 Cavity type          : Scaled VdW (van der Waals Surface) (Alpha=1.100).
 Cavity algorithm     : GePol (No added spheres)
                        Default sphere list used, NSphG=   24.
                        Lebedev-Laikov grids with approx.  5.0 points / Ang**2.
                        Smoothing algorithm: Karplus/York (Gamma=1.0000).
                        Polarization charges: spherical gaussians, with
                                              point-specific exponents (IZeta= 3).
                        Self-potential: point-specific (ISelfS= 7).
                        Self-field    : sphere-specific E.n sum rule (ISelfD= 2).
 1st derivatives      : Analytical E(r).r(x)/FMM algorithm (CHGder, D1EAlg=3).
                        Cavity 1st derivative terms included.
 Solvent              : Acetonitrile, Eps=  35.688000 Eps(inf)=   1.806874
 ------------------------------------------------------------------------------
 GePol: Number of generator spheres                  =      24
 GePol: Total number of spheres                      =      24
 GePol: Number of exposed spheres                    =      24 (100.00%)
 GePol: Number of points                             =    2166
 GePol: Average weight of points                     =       0.13
 GePol: Minimum weight of points                     =   0.27D-08
 GePol: Maximum weight of points                     =    0.20577
 GePol: Number of points with low weight             =     119
 GePol: Fraction of low-weight points (<1% of avg)   =       5.49%
 GePol: Cavity surface area                          =    279.613 Ang**2
 GePol: Cavity volume                                =    305.515 Ang**3
 Leave Link  301 at Sat Jan 11 21:14:27 2020, MaxMem=   183500800 cpu:         1.0
 (Enter E:\Gaussian\G09W\l302.exe)
 NPDir=0 NMtPBC=     1 NCelOv=     1 NCel=       1 NClECP=     1 NCelD=      1
         NCelK=      1 NCelE2=     1 NClLst=     1 CellRange=     0.0.
 One-electron integrals computed using PRISM.
 NBasis=   353 RedAO= T EigKep=  9.51D-05  NBF=   353
 NBsUse=   353 1.00D-06 EigRej= -1.00D+00 NBFU=   353
 Precomputing XC quadrature grid using
 IXCGrd= 4 IRadAn=           0 IRanWt=          -1 IRanGd=           0 AccXCQ= 0.00D+00.
 Generated NRdTot=       0 NPtTot=           0 NUsed=           0 NTot=          16
 NSgBfM=   363   363   363   363   363 MxSgAt=    24 MxSgA2=    24.
 Leave Link  302 at Sat Jan 11 21:14:29 2020, MaxMem=   183500800 cpu:         2.0
 (Enter E:\Gaussian\G09W\l308.exe)
 Leave Link  308 at Sat Jan 11 21:14:30 2020, MaxMem=   183500800 cpu:         1.0
 (Enter E:\Gaussian\G09W\l303.exe)
 DipDrv:  MaxL=1.
 Leave Link  303 at Sat Jan 11 21:14:30 2020, MaxMem=   183500800 cpu:         0.0
 (Enter E:\Gaussian\G09W\l401.exe)
 ExpMin= 1.03D-01 ExpMax= 4.40D+05 ExpMxC= 1.51D+04 IAcc=2 IRadAn=         4 AccDes= 0.00D+00
 Harris functional with IExCor=  402 and IRadAn=       4 diagonalized for initial guess.
 HarFok:  IExCor=  402 AccDes= 0.00D+00 IRadAn=         4 IDoV= 1 UseB2=F ITyADJ=14
 ICtDFT=  3500011 ScaDFX=  1.000000  1.000000  1.000000  1.000000
 FoFCou: FMM=F IPFlag=           0 FMFlag=      100000 FMFlg1=           0
         NFxFlg=           0 DoJE=T BraDBF=F KetDBF=T FulRan=T
         wScrn=  0.000000 ICntrl=     500 IOpCl=  0 I1Cent=   200000004 NGrid=           0
         NMat0=    1 NMatS0=      1 NMatT0=    0 NMatD0=    1 NMtDS0=    0 NMtDT0=    0
 Petite list used in FoFCou.
 Harris En= -3262.59999085718    
 JPrj=0 DoOrth=F DoCkMO=F.
 Leave Link  401 at Sat Jan 11 21:14:48 2020, MaxMem=   183500800 cpu:        17.0
 (Enter E:\Gaussian\G09W\l502.exe)
 Closed shell SCF:
 Using DIIS extrapolation, IDIIS=  1040.
 Integral symmetry usage will be decided dynamically.
 IVT=      438130 IEndB=      438130 NGot=   183500800 MDV=   183218067
 LenX=   183218067 LenY=   183079242
 Requested convergence on RMS density matrix=1.00D-08 within 128 cycles.
 Requested convergence on MAX density matrix=1.00D-06.
 Requested convergence on             energy=1.00D-06.
 No special actions if energy rises.
 Fock matrices will be formed incrementally for  20 cycles.

 Cycle   1  Pass 1  IDiag  1:
 FoFJK:  IHMeth= 1 ICntrl=       0 DoSepK=F KAlg= 0 I1Cent=   0 FoldK=F
 IRaf= 780000000 NMat=   1 IRICut=       1 DoRegI=T DoRafI=F ISym2E= 0.
 FoFCou: FMM=F IPFlag=           0 FMFlag=      100000 FMFlg1=           0
         NFxFlg=           0 DoJE=F BraDBF=F KetDBF=F FulRan=T
         wScrn=  0.000000 ICntrl=       0 IOpCl=  0 I1Cent=           0 NGrid=           0
         NMat0=    1 NMatS0=      1 NMatT0=    0 NMatD0=    1 NMtDS0=    0 NMtDT0=    0
 Symmetry not used in FoFCou.
 Inv3:  Mode=1 IEnd=    14074668.
 Iteration    1 A*A^-1 deviation from unit magnitude is 2.66D-15 for   1118.
 Iteration    1 A*A^-1 deviation from orthogonality  is 3.21D-15 for   1118    802.
 Iteration    1 A^-1*A deviation from unit magnitude is 2.22D-15 for    522.
 Iteration    1 A^-1*A deviation from orthogonality  is 4.40D-14 for   1619   1119.
 E= -3262.19429336391    
 DIIS: error= 9.22D-02 at cycle   1 NSaved=   1.
 NSaved= 1 IEnMin= 1 EnMin= -3262.19429336391     IErMin= 1 ErrMin= 9.22D-02
 ErrMax= 9.22D-02  0.00D+00 EMaxC= 1.00D-01 BMatC= 1.57D+00 BMatP= 1.57D+00
 IDIUse=3 WtCom= 7.78D-02 WtEn= 9.22D-01
 Coeff-Com:  0.100D+01
 Coeff-En:   0.100D+01
 Coeff:      0.100D+01
 Gap=     0.167 Goal=   None    Shift=    0.000
 GapD=    0.167 DampG=1.000 DampE=0.500 DampFc=0.5000 IDamp=-1.
 Damping current iteration by 5.00D-01
 RMSDP=8.69D-03 MaxDP=3.14D-01              OVMax= 2.65D-01

 Cycle   2  Pass 1  IDiag  1:
 RMSU=  4.33D-03    CP:  1.03D+00
 E= -3262.30048617379     Delta-E=       -0.106192809884 Rises=F Damp=T
 DIIS: error= 3.31D-02 at cycle   2 NSaved=   2.
 NSaved= 2 IEnMin= 2 EnMin= -3262.30048617379     IErMin= 2 ErrMin= 3.31D-02
 ErrMax= 3.31D-02  0.00D+00 EMaxC= 1.00D-01 BMatC= 2.54D-01 BMatP= 1.57D+00
 IDIUse=3 WtCom= 6.69D-01 WtEn= 3.31D-01
 Coeff-Com: -0.139D+00 0.114D+01
 Coeff-En:   0.297D+00 0.703D+00
 Coeff:      0.544D-02 0.995D+00
 Gap=     0.177 Goal=   None    Shift=    0.000
 RMSDP=3.31D-03 MaxDP=1.26D-01 DE=-1.06D-01 OVMax= 3.55D-01

 Cycle   3  Pass 1  IDiag  1:
 RMSU=  1.35D-03    CP:  1.00D+00  3.07D-01
 E= -3262.34203325215     Delta-E=       -0.041547078359 Rises=F Damp=F
 DIIS: error= 4.58D-02 at cycle   3 NSaved=   3.
 NSaved= 3 IEnMin= 3 EnMin= -3262.34203325215     IErMin= 2 ErrMin= 3.31D-02
 ErrMax= 4.58D-02  0.00D+00 EMaxC= 1.00D-01 BMatC= 2.50D-01 BMatP= 2.54D-01
 IDIUse=3 WtCom= 5.42D-01 WtEn= 4.58D-01
 Coeff-Com: -0.211D+00 0.669D+00 0.542D+00
 Coeff-En:   0.000D+00 0.428D+00 0.572D+00
 Coeff:     -0.114D+00 0.559D+00 0.555D+00
 Gap=     0.136 Goal=   None    Shift=    0.000
 RMSDP=3.09D-03 MaxDP=1.18D-01 DE=-4.15D-02 OVMax= 2.18D-01

 Cycle   4  Pass 1  IDiag  1:
 RMSU=  8.19D-04    CP:  1.02D+00  9.56D-01  3.01D-01
 E= -3262.46845308004     Delta-E=       -0.126419827889 Rises=F Damp=F
 DIIS: error= 3.07D-02 at cycle   4 NSaved=   4.
 NSaved= 4 IEnMin= 4 EnMin= -3262.46845308004     IErMin= 4 ErrMin= 3.07D-02
 ErrMax= 3.07D-02  0.00D+00 EMaxC= 1.00D-01 BMatC= 8.64D-02 BMatP= 2.50D-01
 IDIUse=3 WtCom= 6.93D-01 WtEn= 3.07D-01
 Coeff-Com: -0.649D-01 0.173D+00 0.402D+00 0.490D+00
 Coeff-En:   0.000D+00 0.000D+00 0.315D+00 0.685D+00
 Coeff:     -0.449D-01 0.120D+00 0.375D+00 0.550D+00
 Gap=     0.155 Goal=   None    Shift=    0.000
 RMSDP=1.54D-03 MaxDP=6.65D-02 DE=-1.26D-01 OVMax= 9.14D-02

 Cycle   5  Pass 1  IDiag  1:
 RMSU=  2.67D-04    CP:  1.01D+00  6.37D-01  6.37D-01  4.95D-01
 E= -3262.53503400436     Delta-E=       -0.066580924322 Rises=F Damp=F
 DIIS: error= 4.71D-03 at cycle   5 NSaved=   5.
 NSaved= 5 IEnMin= 5 EnMin= -3262.53503400436     IErMin= 5 ErrMin= 4.71D-03
 ErrMax= 4.71D-03  0.00D+00 EMaxC= 1.00D-01 BMatC= 3.00D-03 BMatP= 8.64D-02
 IDIUse=3 WtCom= 9.53D-01 WtEn= 4.71D-02
 Coeff-Com: -0.556D-02 0.185D-01 0.126D+00 0.277D+00 0.584D+00
 Coeff-En:   0.000D+00 0.000D+00 0.000D+00 0.000D+00 0.100D+01
 Coeff:     -0.529D-02 0.176D-01 0.120D+00 0.264D+00 0.604D+00
 Gap=     0.140 Goal=   None    Shift=    0.000
 RMSDP=3.32D-04 MaxDP=1.51D-02 DE=-6.66D-02 OVMax= 1.76D-02

 Cycle   6  Pass 1  IDiag  1:
 RMSU=  1.00D-04    CP:  1.02D+00  7.01D-01  5.96D-01  5.78D-01  5.35D-01
 E= -3262.53727527948     Delta-E=       -0.002241275112 Rises=F Damp=F
 DIIS: error= 1.21D-03 at cycle   6 NSaved=   6.
 NSaved= 6 IEnMin= 6 EnMin= -3262.53727527948     IErMin= 6 ErrMin= 1.21D-03
 ErrMax= 1.21D-03  0.00D+00 EMaxC= 1.00D-01 BMatC= 2.91D-04 BMatP= 3.00D-03
 IDIUse=3 WtCom= 9.88D-01 WtEn= 1.21D-02
 Coeff-Com:  0.381D-02-0.721D-02 0.245D-01 0.953D-01 0.366D+00 0.518D+00
 Coeff-En:   0.000D+00 0.000D+00 0.000D+00 0.000D+00 0.321D-01 0.968D+00
 Coeff:      0.376D-02-0.712D-02 0.242D-01 0.942D-01 0.362D+00 0.523D+00
 Gap=     0.138 Goal=   None    Shift=    0.000
 RMSDP=9.24D-05 MaxDP=4.08D-03 DE=-2.24D-03 OVMax= 6.89D-03

 Cycle   7  Pass 1  IDiag  1:
 RMSU=  3.70D-05    CP:  1.02D+00  6.89D-01  6.03D-01  5.84D-01  6.53D-01
                    CP:  4.06D-01
 E= -3262.53748617545     Delta-E=       -0.000210895973 Rises=F Damp=F
 DIIS: error= 5.74D-04 at cycle   7 NSaved=   7.
 NSaved= 7 IEnMin= 7 EnMin= -3262.53748617545     IErMin= 7 ErrMin= 5.74D-04
 ErrMax= 5.74D-04  0.00D+00 EMaxC= 1.00D-01 BMatC= 4.70D-05 BMatP= 2.91D-04
 IDIUse=3 WtCom= 9.94D-01 WtEn= 5.74D-03
 Coeff-Com:  0.257D-02-0.548D-02 0.178D-02 0.280D-01 0.169D+00 0.347D+00
 Coeff-Com:  0.457D+00
 Coeff-En:   0.000D+00 0.000D+00 0.000D+00 0.000D+00 0.000D+00 0.111D+00
 Coeff-En:   0.889D+00
 Coeff:      0.256D-02-0.545D-02 0.177D-02 0.279D-01 0.168D+00 0.345D+00
 Coeff:      0.460D+00
 Gap=     0.138 Goal=   None    Shift=    0.000
 RMSDP=3.07D-05 MaxDP=1.05D-03 DE=-2.11D-04 OVMax= 1.51D-03

 Cycle   8  Pass 1  IDiag  1:
 RMSU=  9.63D-06    CP:  1.02D+00  6.90D-01  6.00D-01  5.86D-01  6.39D-01
                    CP:  5.69D-01  3.66D-01
 E= -3262.53752312775     Delta-E=       -0.000036952299 Rises=F Damp=F
 DIIS: error= 1.39D-04 at cycle   8 NSaved=   8.
 NSaved= 8 IEnMin= 8 EnMin= -3262.53752312775     IErMin= 8 ErrMin= 1.39D-04
 ErrMax= 1.39D-04  0.00D+00 EMaxC= 1.00D-01 BMatC= 2.69D-06 BMatP= 4.70D-05
 IDIUse=3 WtCom= 9.99D-01 WtEn= 1.39D-03
 Coeff-Com:  0.980D-03-0.217D-02-0.117D-02 0.593D-02 0.614D-01 0.141D+00
 Coeff-Com:  0.255D+00 0.539D+00
 Coeff-En:   0.000D+00 0.000D+00 0.000D+00 0.000D+00 0.000D+00 0.000D+00
 Coeff-En:   0.000D+00 0.100D+01
 Coeff:      0.979D-03-0.217D-02-0.117D-02 0.593D-02 0.613D-01 0.141D+00
 Coeff:      0.255D+00 0.539D+00
 Gap=     0.138 Goal=   None    Shift=    0.000
 RMSDP=7.93D-06 MaxDP=2.79D-04 DE=-3.70D-05 OVMax= 6.05D-04

 Cycle   9  Pass 1  IDiag  1:
 RMSU=  3.27D-06    CP:  1.02D+00  6.90D-01  6.01D-01  5.83D-01  6.45D-01
                    CP:  5.55D-01  4.91D-01  5.66D-01
 E= -3262.53752508590     Delta-E=       -0.000001958149 Rises=F Damp=F
 DIIS: error= 5.34D-05 at cycle   9 NSaved=   9.
 NSaved= 9 IEnMin= 9 EnMin= -3262.53752508590     IErMin= 9 ErrMin= 5.34D-05
 ErrMax= 5.34D-05  0.00D+00 EMaxC= 1.00D-01 BMatC= 3.72D-07 BMatP= 2.69D-06
 IDIUse=1 WtCom= 1.00D+00 WtEn= 0.00D+00
 Coeff-Com:  0.403D-03-0.889D-03-0.745D-03 0.134D-02 0.239D-01 0.552D-01
 Coeff-Com:  0.117D+00 0.338D+00 0.466D+00
 Coeff:      0.403D-03-0.889D-03-0.745D-03 0.134D-02 0.239D-01 0.552D-01
 Coeff:      0.117D+00 0.338D+00 0.466D+00
 Gap=     0.138 Goal=   None    Shift=    0.000
 RMSDP=2.55D-06 MaxDP=1.08D-04 DE=-1.96D-06 OVMax= 2.23D-04

 Cycle  10  Pass 1  IDiag  1:
 RMSU=  7.75D-07    CP:  1.02D+00  6.90D-01  6.01D-01  5.83D-01  6.46D-01
                    CP:  5.57D-01  4.65D-01  6.45D-01  6.12D-01
 E= -3262.53752541552     Delta-E=       -0.000000329621 Rises=F Damp=F
 DIIS: error= 8.24D-06 at cycle  10 NSaved=  10.
 NSaved=10 IEnMin=10 EnMin= -3262.53752541552     IErMin=10 ErrMin= 8.24D-06
 ErrMax= 8.24D-06  0.00D+00 EMaxC= 1.00D-01 BMatC= 1.65D-08 BMatP= 3.72D-07
 IDIUse=1 WtCom= 1.00D+00 WtEn= 0.00D+00
 Coeff-Com:  0.142D-03-0.313D-03-0.284D-03 0.149D-03 0.675D-02 0.144D-01
 Coeff-Com:  0.361D-01 0.124D+00 0.225D+00 0.593D+00
 Coeff:      0.142D-03-0.313D-03-0.284D-03 0.149D-03 0.675D-02 0.144D-01
 Coeff:      0.361D-01 0.124D+00 0.225D+00 0.593D+00
 Gap=     0.138 Goal=   None    Shift=    0.000
 RMSDP=4.76D-07 MaxDP=2.80D-05 DE=-3.30D-07 OVMax= 3.31D-05

 Cycle  11  Pass 1  IDiag  1:
 RMSU=  2.12D-07    CP:  1.02D+00  6.90D-01  6.01D-01  5.83D-01  6.46D-01
                    CP:  5.56D-01  4.70D-01  6.46D-01  6.40D-01  6.58D-01
 E= -3262.53752542927     Delta-E=       -0.000000013751 Rises=F Damp=F
 DIIS: error= 3.42D-06 at cycle  11 NSaved=  11.
 NSaved=11 IEnMin=11 EnMin= -3262.53752542927     IErMin=11 ErrMin= 3.42D-06
 ErrMax= 3.42D-06  0.00D+00 EMaxC= 1.00D-01 BMatC= 2.40D-09 BMatP= 1.65D-08
 IDIUse=1 WtCom= 1.00D+00 WtEn= 0.00D+00
 Coeff-Com:  0.228D-04-0.522D-04-0.519D-04-0.914D-04 0.698D-03 0.916D-03
 Coeff-Com:  0.600D-02 0.320D-01 0.753D-01 0.335D+00 0.550D+00
 Coeff:      0.228D-04-0.522D-04-0.519D-04-0.914D-04 0.698D-03 0.916D-03
 Coeff:      0.600D-02 0.320D-01 0.753D-01 0.335D+00 0.550D+00
 Gap=     0.138 Goal=   None    Shift=    0.000
 RMSDP=2.18D-07 MaxDP=6.58D-06 DE=-1.38D-08 OVMax= 1.90D-05

 Cycle  12  Pass 1  IDiag  1:
 RMSU=  1.02D-07    CP:  1.02D+00  6.90D-01  6.01D-01  5.83D-01  6.46D-01
                    CP:  5.55D-01  4.69D-01  6.48D-01  6.25D-01  7.28D-01
                    CP:  7.27D-01
 E= -3262.53752543122     Delta-E=       -0.000000001949 Rises=F Damp=F
 DIIS: error= 1.03D-06 at cycle  12 NSaved=  12.
 NSaved=12 IEnMin=12 EnMin= -3262.53752543122     IErMin=12 ErrMin= 1.03D-06
 ErrMax= 1.03D-06  0.00D+00 EMaxC= 1.00D-01 BMatC= 2.68D-10 BMatP= 2.40D-09
 IDIUse=1 WtCom= 1.00D+00 WtEn= 0.00D+00
 Coeff-Com:  0.145D-05-0.468D-05-0.132D-04-0.523D-04-0.231D-04-0.260D-03
 Coeff-Com:  0.958D-03 0.954D-02 0.269D-01 0.134D+00 0.295D+00 0.534D+00
 Coeff:      0.145D-05-0.468D-05-0.132D-04-0.523D-04-0.231D-04-0.260D-03
 Coeff:      0.958D-03 0.954D-02 0.269D-01 0.134D+00 0.295D+00 0.534D+00
 Gap=     0.138 Goal=   None    Shift=    0.000
 RMSDP=6.17D-08 MaxDP=2.60D-06 DE=-1.95D-09 OVMax= 7.33D-06

 Cycle  13  Pass 1  IDiag  1:
 RMSU=  2.89D-08    CP:  1.02D+00  6.90D-01  6.01D-01  5.83D-01  6.46D-01
                    CP:  5.55D-01  4.69D-01  6.48D-01  6.30D-01  7.29D-01
                    CP:  7.99D-01  6.43D-01
 E= -3262.53752543146     Delta-E=       -0.000000000239 Rises=F Damp=F
 DIIS: error= 2.91D-07 at cycle  13 NSaved=  13.
 NSaved=13 IEnMin=13 EnMin= -3262.53752543146     IErMin=13 ErrMin= 2.91D-07
 ErrMax= 2.91D-07  0.00D+00 EMaxC= 1.00D-01 BMatC= 3.95D-11 BMatP= 2.68D-10
 IDIUse=1 WtCom= 1.00D+00 WtEn= 0.00D+00
 Coeff-Com: -0.361D-05 0.757D-05-0.125D-05-0.143D-04-0.149D-03-0.317D-03
 Coeff-Com: -0.685D-03-0.505D-03 0.267D-02 0.186D-01 0.701D-01 0.291D+00
 Coeff-Com:  0.619D+00
 Coeff:     -0.361D-05 0.757D-05-0.125D-05-0.143D-04-0.149D-03-0.317D-03
 Coeff:     -0.685D-03-0.505D-03 0.267D-02 0.186D-01 0.701D-01 0.291D+00
 Coeff:      0.619D+00
 Gap=     0.138 Goal=   None    Shift=    0.000
 RMSDP=2.55D-08 MaxDP=9.01D-07 DE=-2.39D-10 OVMax= 1.60D-06

 Cycle  14  Pass 1  IDiag  1:
 RMSU=  8.62D-09    CP:  1.02D+00  6.90D-01  6.01D-01  5.83D-01  6.46D-01
                    CP:  5.56D-01  4.69D-01  6.48D-01  6.31D-01  7.31D-01
                    CP:  7.94D-01  7.19D-01  7.58D-01
 E= -3262.53752543148     Delta-E=       -0.000000000022 Rises=F Damp=F
 DIIS: error= 8.84D-08 at cycle  14 NSaved=  14.
 NSaved=14 IEnMin=14 EnMin= -3262.53752543148     IErMin=14 ErrMin= 8.84D-08
 ErrMax= 8.84D-08  0.00D+00 EMaxC= 1.00D-01 BMatC= 2.68D-12 BMatP= 3.95D-11
 IDIUse=1 WtCom= 1.00D+00 WtEn= 0.00D+00
 Coeff-Com: -0.205D-05 0.442D-05-0.225D-06-0.461D-05-0.890D-04-0.174D-03
 Coeff-Com: -0.483D-03-0.962D-03-0.326D-03 0.179D-02 0.214D-01 0.128D+00
 Coeff-Com:  0.319D+00 0.532D+00
 Coeff:     -0.205D-05 0.442D-05-0.225D-06-0.461D-05-0.890D-04-0.174D-03
 Coeff:     -0.483D-03-0.962D-03-0.326D-03 0.179D-02 0.214D-01 0.128D+00
 Coeff:      0.319D+00 0.532D+00
 Gap=     0.138 Goal=   None    Shift=    0.000
 RMSDP=5.85D-09 MaxDP=2.14D-07 DE=-2.18D-11 OVMax= 6.37D-07

 Error on total polarization charges =  0.01381
 SCF Done:  E(RB3LYP) =  -3262.53752543     A.U. after   14 cycles
            NFock= 14  Conv=0.59D-08     -V/T= 2.0018
 KE= 3.256682760834D+03 PE=-1.050174873850D+04 EE= 2.609761257072D+03
 Leave Link  502 at Sat Jan 11 21:28:40 2020, MaxMem=   183500800 cpu:       831.0
 (Enter E:\Gaussian\G09W\l801.exe)
 DoSCS=F DFT=T ScalE2(SS,OS)=  1.000000  1.000000
 ExpMin= 1.03D-01 ExpMax= 4.40D+05 ExpMxC= 1.51D+04 IAcc=3 IRadAn=         5 AccDes= 0.00D+00
 HarFok:  IExCor=  205 AccDes= 0.00D+00 IRadAn=         5 IDoV=-2 UseB2=F ITyADJ=14
 ICtDFT= 12500011 ScaDFX=  1.000000  1.000000  1.000000  1.000000
 Largest valence mixing into a core orbital is  2.27D-04
 Largest core mixing into a valence orbital is  2.00D-05
 Range of M.O.s used for correlation:    31   353
 NBasis=   353 NAE=    71 NBE=    71 NFC=    30 NFV=     0
 NROrb=    323 NOA=    41 NOB=    41 NVA=   282 NVB=   282

 **** Warning!!: The largest alpha MO coefficient is  0.24614194D+02

 Leave Link  801 at Sat Jan 11 21:28:42 2020, MaxMem=   183500800 cpu:         2.0
 (Enter E:\Gaussian\G09W\l914.exe)
 RHF ground state
 MDV=   183500800 DFT=T DoStab=F Mixed=T DoRPA=T DoScal=F NonHer=T
 NEqPCM:  Using equilibrium solvation (IEInf=0, Eps=  35.6880, EpsInf=   1.8069)
 Making orbital integer symmetry assigments:
 Orbital symmetries:
       Occupied  (A) (A) (A) (A) (A) (A) (A) (A) (A) (A) (A) (A)
                 (A) (A) (A) (A) (A) (A) (A) (A) (A) (A) (A) (A)
                 (A) (A) (A) (A) (A) (A) (A) (A) (A) (A) (A) (A)
                 (A) (A) (A) (A) (A) (A) (A) (A) (A) (A) (A) (A)
                 (A) (A) (A) (A) (A) (A) (A) (A) (A) (A) (A) (A)
                 (A) (A) (A) (A) (A) (A) (A) (A) (A) (A) (A)
       Virtual   (A) (A) (A) (A) (A) (A) (A) (A) (A) (A) (A) (A)
                 (A) (A) (A) (A) (A) (A) (A) (A) (A) (A) (A) (A)
                 (A) (A) (A) (A) (A) (A) (A) (A) (A) (A) (A) (A)
                 (A) (A) (A) (A) (A) (A) (A) (A) (A) (A) (A) (A)
                 (A) (A) (A) (A) (A) (A) (A) (A) (A) (A) (A) (A)
                 (A) (A) (A) (A) (A) (A) (A) (A) (A) (A) (A) (A)
                 (A) (A) (A) (A) (A) (A) (A) (A) (A) (A) (A) (A)
                 (A) (A) (A) (A) (A) (A) (A) (A) (A) (A) (A) (A)
                 (A) (A) (A) (A) (A) (A) (A) (A) (A) (A) (A) (A)
                 (A) (A) (A) (A) (A) (A) (A) (A) (A) (A) (A) (A)
                 (A) (A) (A) (A) (A) (A) (A) (A) (A) (A) (A) (A)
                 (A) (A) (A) (A) (A) (A) (A) (A) (A) (A) (A) (A)
                 (A) (A) (A) (A) (A) (A) (A) (A) (A) (A) (A) (A)
                 (A) (A) (A) (A) (A) (A) (A) (A) (A) (A) (A) (A)
                 (A) (A) (A) (A) (A) (A) (A) (A) (A) (A) (A) (A)
                 (A) (A) (A) (A) (A) (A) (A) (A) (A) (A) (A) (A)
                 (A) (A) (A) (A) (A) (A) (A) (A) (A) (A) (A) (A)
                 (A) (A) (A) (A) (A) (A) (A) (A) (A) (A) (A) (A)
                 (A) (A) (A) (A) (A) (A) (A) (A) (A) (A) (A) (A)
                 (A) (A) (A) (A) (A) (A) (A) (A) (A) (A) (A) (A)
                 (A) (A) (A) (A) (A) (A) (A) (A) (A) (A) (A) (A)
                 (A) (A) (A) (A) (A) (A) (A) (A) (A) (A) (A) (A)
                 (A) (A) (A) (A) (A) (A) (A) (A) (A) (A) (A) (A)
                 (A) (A) (A) (A) (A) (A)
    20 initial guesses have been made.
 Convergence on wavefunction:    0.000001000000000
 Davidson Disk Diagonalization:  ConvIn= 1.00D-06 SkipCon=T Conv= 1.00D-06.
 Max sub-space:   200 roots to seek:    20 dimension of matrix:        23124
 Iteration     1 Dimension    20 NMult     0 NNew     20
 CISAX will form    20 AO SS matrices at one time.
 NMat=    20 NSing=    20 JSym2X= 0.
 FoFJK:  IHMeth= 1 ICntrl=       0 DoSepK=F KAlg= 0 I1Cent=   0 FoldK=F
 IRaf=         0 NMat=  40 IRICut=       1 DoRegI=T DoRafI=F ISym2E= 0.
 FoFCou: FMM=F IPFlag=           0 FMFlag=      100000 FMFlg1=           0
         NFxFlg=           0 DoJE=F BraDBF=F KetDBF=F FulRan=T
         wScrn=  0.000000 ICntrl=       0 IOpCl=  0 I1Cent=           0 NGrid=           0
         NMat0=   40 NMatS0=     20 NMatT0=    0 NMatD0=   40 NMtDS0=    0 NMtDT0=    0
 Symmetry not used in FoFCou.
 New state      1 was old state      2
 New state      2 was old state      5
 New state      3 was old state      1
 New state      5 was old state      3
 Excitation Energies [eV] at current iteration:
 Root      1 :     2.842569278287940
 Root      2 :     3.107457443905873
 Root      3 :     3.312932190365193
 Root      4 :     3.688362911694925
 Root      5 :     3.832960192375902
 Root      6 :     4.291059706176732
 Root      7 :     4.344900139082641
 Root      8 :     4.559555271575432
 Root      9 :     4.825921175006985
 Root     10 :     4.849659519251079
 Root     11 :     5.165443203343769
 Root     12 :     5.358671219972201
 Root     13 :     5.520663919040555
 Root     14 :     5.538335735349300
 Root     15 :     5.545800467028252
 Root     16 :     5.638663464557143
 Root     17 :     5.725636525191662
 Root     18 :     6.100692985110737
 Root     19 :     6.315436313538092
 Root     20 :     6.582208422853279
 Iteration     2 Dimension    30 NMult    20 NNew     10
 CISAX will form    10 AO SS matrices at one time.
 NMat=    10 NSing=    10 JSym2X= 0.
 Root      1 not converged, maximum delta is    0.033954302842300
 Root      2 not converged, maximum delta is    0.040364774371139
 Root      3 not converged, maximum delta is    0.057151904162333
 Root      4 not converged, maximum delta is    0.138354835594504
 Root      5 not converged, maximum delta is    0.131489318498560
 Excitation Energies [eV] at current iteration:
 Root      1 :     2.773587653059677   Change is   -0.068981625228263
 Root      2 :     3.035090726676198   Change is   -0.072366717229675
 Root      3 :     3.117961428154076   Change is   -0.194970762211117
 Root      4 :     3.484237780544343   Change is   -0.204125131150582
 Root      5 :     3.576522499969387   Change is   -0.256437692406515
 Iteration     3 Dimension    40 NMult    30 NNew     10
 CISAX will form    10 AO SS matrices at one time.
 NMat=    10 NSing=    10 JSym2X= 0.
 Root      1 not converged, maximum delta is    0.003159769610521
 Root      2 not converged, maximum delta is    0.003058103896752
 Root      3 not converged, maximum delta is    0.009110943430462
 Root      4 not converged, maximum delta is    0.037371504437537
 Root      5 not converged, maximum delta is    0.041309007878440
 Excitation Energies [eV] at current iteration:
 Root      1 :     2.771760007258838   Change is   -0.001827645800839
 Root      2 :     3.033623342198495   Change is   -0.001467384477703
 Root      3 :     3.109754143143132   Change is   -0.008207285010943
 Root      4 :     3.468300377042142   Change is   -0.015937403502201
 Root      5 :     3.556283386161911   Change is   -0.020239113807476
 Iteration     4 Dimension    50 NMult    40 NNew     10
 CISAX will form    10 AO SS matrices at one time.
 NMat=    10 NSing=    10 JSym2X= 0.
 Root      1 not converged, maximum delta is    0.000310574639439
 Root      2 not converged, maximum delta is    0.000233594921926
 Root      3 not converged, maximum delta is    0.002337824412931
 Root      4 not converged, maximum delta is    0.006889367388427
 Root      5 not converged, maximum delta is    0.008414001404932
 Excitation Energies [eV] at current iteration:
 Root      1 :     2.771714542348067   Change is   -0.000045464910771
 Root      2 :     3.033581775320215   Change is   -0.000041566878281
 Root      3 :     3.108733082153045   Change is   -0.001021060990087
 Root      4 :     3.466569561412756   Change is   -0.001730815629386
 Root      5 :     3.553580624747223   Change is   -0.002702761414688
 Iteration     5 Dimension    60 NMult    50 NNew     10
 CISAX will form    10 AO SS matrices at one time.
 NMat=    10 NSing=    10 JSym2X= 0.
 Root      1 not converged, maximum delta is    0.000196900202892
 Root      2 not converged, maximum delta is    0.000142683232973
 Root      3 not converged, maximum delta is    0.000529894658385
 Root      4 not converged, maximum delta is    0.002603227224126
 Root      5 not converged, maximum delta is    0.004278034669634
 Excitation Energies [eV] at current iteration:
 Root      1 :     2.771712819264647   Change is   -0.000001723083420
 Root      2 :     3.033579965356086   Change is   -0.000001809964129
 Root      3 :     3.108644706426226   Change is   -0.000088375726819
 Root      4 :     3.466283239008877   Change is   -0.000286322403879
 Root      5 :     3.553197678099057   Change is   -0.000382946648165
 Iteration     6 Dimension    70 NMult    60 NNew     10
 CISAX will form    10 AO SS matrices at one time.
 NMat=    10 NSing=    10 JSym2X= 0.
 Root      1 not converged, maximum delta is    0.000018503426006
 Root      2 not converged, maximum delta is    0.000012116536092
 Root      3 not converged, maximum delta is    0.000195244341544
 Root      4 not converged, maximum delta is    0.000330230488392
 Root      5 not converged, maximum delta is    0.000603843917180
 Excitation Energies [eV] at current iteration:
 Root      1 :     2.771712752161272   Change is   -0.000000067103375
 Root      2 :     3.033579892143875   Change is   -0.000000073212211
 Root      3 :     3.108636818601142   Change is   -0.000007887825085
 Root      4 :     3.466260213831001   Change is   -0.000023025177877
 Root      5 :     3.553163234578669   Change is   -0.000034443520388
 Iteration     7 Dimension    80 NMult    70 NNew     10
 CISAX will form    10 AO SS matrices at one time.
 NMat=    10 NSing=    10 JSym2X= 0.
 Root      1 not converged, maximum delta is    0.000003555038545
 Root      2 not converged, maximum delta is    0.000004962156986
 Root      3 not converged, maximum delta is    0.000067211124350
 Root      4 not converged, maximum delta is    0.000077755730198
 Root      5 not converged, maximum delta is    0.000182964159773
 Excitation Energies [eV] at current iteration:
 Root      1 :     2.771712750490584   Change is   -0.000000001670688
 Root      2 :     3.033579888984978   Change is   -0.000000003158897
 Root      3 :     3.108636187264540   Change is   -0.000000631336601
 Root      4 :     3.466258846674736   Change is   -0.000001367156264
 Root      5 :     3.553160259032529   Change is   -0.000002975546141
 Iteration     8 Dimension    90 NMult    80 NNew     10
 CISAX will form    10 AO SS matrices at one time.
 NMat=    10 NSing=    10 JSym2X= 0.
 Root      1 has converged.
 Root      2 not converged, maximum delta is    0.000001003666065
 Root      3 not converged, maximum delta is    0.000009449692528
 Root      4 not converged, maximum delta is    0.000018580944607
 Root      5 not converged, maximum delta is    0.000026963148905
 Excitation Energies [eV] at current iteration:
 Root      1 :     2.771712750442655   Change is   -0.000000000047930
 Root      2 :     3.033579888865281   Change is   -0.000000000119697
 Root      3 :     3.108636142653880   Change is   -0.000000044610660
 Root      4 :     3.466258742896976   Change is   -0.000000103777761
 Root      5 :     3.553159982434266   Change is   -0.000000276598263
 Iteration     9 Dimension    98 NMult    90 NNew      8
 CISAX will form     8 AO SS matrices at one time.
 NMat=     8 NSing=     8 JSym2X= 0.
 Root      1 has converged.
 Root      2 has converged.
 Root      3 not converged, maximum delta is    0.000001966520801
 Root      4 not converged, maximum delta is    0.000003312723544
 Root      5 not converged, maximum delta is    0.000013727951089
 Excitation Energies [eV] at current iteration:
 Root      1 :     2.771712750442892   Change is    0.000000000000237
 Root      2 :     3.033579888861515   Change is   -0.000000000003767
 Root      3 :     3.108636140359284   Change is   -0.000000002294596
 Root      4 :     3.466258737414671   Change is   -0.000000005482305
 Root      5 :     3.553159968588859   Change is   -0.000000013845407
 Iteration    10 Dimension   104 NMult    98 NNew      6
 CISAX will form     6 AO SS matrices at one time.
 NMat=     6 NSing=     6 JSym2X= 0.
 Root      1 has converged.
 Root      2 has converged.
 Root      3 has converged.
 Root      4 has converged.
 Root      5 not converged, maximum delta is    0.000001990494053
 Excitation Energies [eV] at current iteration:
 Root      1 :     2.771712750442655   Change is   -0.000000000000237
 Root      2 :     3.033579888861568   Change is    0.000000000000054
 Root      3 :     3.108636140224335   Change is   -0.000000000134949
 Root      4 :     3.466258737182012   Change is   -0.000000000232659
 Root      5 :     3.553159968010424   Change is   -0.000000000578435
 Iteration    11 Dimension   106 NMult   104 NNew      2
 CISAX will form     2 AO SS matrices at one time.
 NMat=     2 NSing=     2 JSym2X= 0.
 Root      1 has converged.
 Root      2 has converged.
 Root      3 has converged.
 Root      4 has converged.
 Root      5 has converged.
 Excitation Energies [eV] at current iteration:
 Root      1 :     2.771712750442565   Change is   -0.000000000000089
 Root      2 :     3.033579888861541   Change is   -0.000000000000027
 Root      3 :     3.108636140223860   Change is   -0.000000000000476
 Root      4 :     3.466258737177554   Change is   -0.000000000004458
 Root      5 :     3.553159967987334   Change is   -0.000000000023090
 Convergence achieved on expansion vectors.
 ***********************************************************************
 Excited states from <AA,BB:AA,BB> singles matrix:
 ***********************************************************************
 
 1PDM for each excited state written to RWF  633
 Ground to excited state transition densities written to RWF  633
 Ground to excited state transition electric dipole moments (Au):
       state          X           Y           Z        Dip. S.      Osc.
         1         0.0000      0.0000      0.0021      0.0000      0.0000
         2        -0.0003      0.0000     -0.0011      0.0000      0.0000
         3         1.0004      0.1578      0.0000      1.0257      0.0781
         4         1.3314     -0.3065      0.0000      1.8665      0.1585
         5         1.1376      0.4127      0.0000      1.4645      0.1275
 Ground to excited state transition velocity dipole moments (Au):
       state          X           Y           Z        Dip. S.      Osc.
         1         0.0000      0.0000     -0.0003      0.0000      0.0000
         2         0.0000      0.0000      0.0003      0.0000      0.0000
         3        -0.1131     -0.0167      0.0000      0.0131      0.0763
         4        -0.1727      0.0393      0.0000      0.0314      0.1642
         5        -0.1484     -0.0500      0.0000      0.0245      0.1252
 Ground to excited state transition magnetic dipole moments (Au):
       state          X           Y           Z
         1        -0.1651     -0.7634      0.0001
         2         0.0538      0.2595     -0.0002
         3         0.0000      0.0001      1.2153
         4         0.0000      0.0000     -0.0303
         5         0.0000     -0.0001     -0.8033
 Ground to excited state transition velocity quadrupole moments (Au):
       state          XX          YY          ZZ          XY          XZ          YZ
         1         0.0000      0.0000      0.0000      0.0000      0.0184     -0.0044
         2         0.0000      0.0000      0.0000      0.0000     -0.0083      0.0015
         3         0.2757     -0.2161      0.0130      0.2493      0.0000      0.0000
         4        -1.5490      0.2075     -0.0178      0.2164      0.0000      0.0000
         5         0.2285     -0.1488      0.0241     -0.4493      0.0000      0.0000
 <0|del|b> * <b|rxdel|0> + <0|del|b> * <b|delr+rdel|0>
 Rotatory Strengths (R) in cgs (10**-40 erg-esu-cm/Gauss)
       state          XX          YY          ZZ    R(velocity)    E-M Angle
         1         0.0012     -0.0005      0.0010      0.0006       90.00
         2         0.0000      0.0053      0.0054      0.0036       90.00
         3        -0.0138     -0.0119      0.0002     -0.0085       90.00
         4        -0.0015      0.0157     -0.0124      0.0006       90.00
         5         0.0168     -0.0092      0.0027      0.0035       90.00
 1/2[<0|r|b>*<b|rxdel|0> + (<0|rxdel|b>*<b|r|0>)*]
 Rotatory Strengths (R) in cgs (10**-40 erg-esu-cm/Gauss)
       state          XX          YY          ZZ     R(length)
         1        -0.0007      0.0018     -0.0002      0.0003
         2         0.0104      0.0009     -0.0002      0.0037
         3        -0.0008     -0.0121     -0.0144     -0.0091
         4         0.0072     -0.0057      0.0002      0.0006
         5        -0.0113      0.0173      0.0050      0.0036
  1/2[<0|del|b>*<b|r|0> + (<0|r|b>*<b|del|0>)*] (Au)
       state          X           Y           Z        Dip. S.   Osc.(frdel)
         1         0.0000      0.0000      0.0000      0.0000      0.0000
         2         0.0000      0.0000      0.0000      0.0000      0.0000
         3        -0.1132     -0.0026      0.0000      0.1158      0.0772
         4        -0.2300     -0.0120      0.0000      0.2420      0.1613
         5        -0.1688     -0.0206      0.0000      0.1894      0.1263

 Excitation energies and oscillator strengths:
 
 Excited State   1:      Singlet-A      2.7717 eV  447.32 nm  f=0.0000  <S**2>=0.000
      70 -> 72         0.69327
 This state for optimization and/or second-order correction.
 Total Energy, E(TD-HF/TD-KS) =  -3262.43566686    
 Copying the excited state density for this state as the 1-particle RhoCI density.
 
 Excited State   2:      Singlet-A      3.0336 eV  408.71 nm  f=0.0000  <S**2>=0.000
      67 -> 72         0.68759
      70 -> 73         0.11426
 
 Excited State   3:      Singlet-A      3.1086 eV  398.84 nm  f=0.0781  <S**2>=0.000
      68 -> 72        -0.12775
      69 -> 72         0.16376
      71 -> 72         0.67141
 
 Excited State   4:      Singlet-A      3.4663 eV  357.69 nm  f=0.1585  <S**2>=0.000
      68 -> 72         0.35568
      69 -> 72         0.58872
 
 Excited State   5:      Singlet-A      3.5532 eV  348.94 nm  f=0.1275  <S**2>=0.000
      66 -> 72         0.26447
      68 -> 72         0.52396
      69 -> 72        -0.33392
      71 -> 72         0.16797
 SavETr:  write IOETrn=   770 NScale= 10 NData=  16 NLR=1 NState=    5 LETran=      96.
 The selected state is a singlet
 CISAX will form     1 AO SS matrices at one time.
 NMat=     1 NSing=     1 JSym2X= 0.
 GePol: Maximum number of non-zero 1st derivatives   =     351
 CISAX will form     1 AO SS matrices at one time.
 NMat=     1 NSing=     1 JSym2X= 0.
 Leave Link  914 at Sat Jan 11 22:22:31 2020, MaxMem=   183500800 cpu:      3228.0
 (Enter E:\Gaussian\G09W\l1002.exe)
 Minotr:  Closed shell wavefunction.
          Computing CIS/TD-HF/TD-KS derivatives.
          Using Z-Vector for PSCF gradient.
          Skipping F1 and S1 gradient terms here.
          IDoAtm=111111111111111111111111
 NEqPCM:  Using equilibrium solvation (IEInf=0, Eps=  35.6880, EpsInf=   1.8069)
          Frozen-core window.
          Direct CPHF calculation.
          Differentiating once with respect to electric field.
                with respect to dipole field.
          Differentiating once with respect to nuclear coordinates.
          Requested convergence is 1.0D-10 RMS, and 1.0D-09 maximum.
          NewPWx=F KeepS1=T KeepF1=T KeepIn=T MapXYZ=F SortEE=F KeepMc=T.
          MDV=     183500466 using IRadAn=       0.
 Using stored XC quadrature information.
          Solving linear equations separately, MaxMat=       0.
          There are     1 degrees of freedom in the 1st order CPHF.  IDoFFX=0 NUNeed=     1.
 FoFJK:  IHMeth= 1 ICntrl=       0 DoSepK=F KAlg= 0 I1Cent=   0 FoldK=F
 IRaf= 800000000 NMat=   1 IRICut=       1 DoRegI=T DoRafI=F ISym2E=-1.
 FoFCou: FMM=F IPFlag=           0 FMFlag=      100000 FMFlg1=           0
         NFxFlg=           0 DoJE=F BraDBF=F KetDBF=F FulRan=T
         wScrn=  0.000000 ICntrl=       0 IOpCl=  0 I1Cent=           0 NGrid=           0
         NMat0=    1 NMatS0=      1 NMatT0=    0 NMatD0=    1 NMtDS0=    0 NMtDT0=    0
 Petite list used in FoFCou.
 LinEq1:  Iter=  0 NonCon=     1 RMS=1.03D-02 Max=5.57D-01 NDo=     1
 AX will form     1 AO Fock derivatives at one time.
 LinEq1:  Iter=  1 NonCon=     1 RMS=2.67D-03 Max=1.23D-01 NDo=     1
 LinEq1:  Iter=  2 NonCon=     1 RMS=2.51D-03 Max=8.65D-02 NDo=     1
 LinEq1:  Iter=  3 NonCon=     1 RMS=1.24D-03 Max=4.40D-02 NDo=     1
 LinEq1:  Iter=  4 NonCon=     1 RMS=8.33D-04 Max=3.52D-02 NDo=     1
 LinEq1:  Iter=  5 NonCon=     1 RMS=5.66D-04 Max=1.83D-02 NDo=     1
 LinEq1:  Iter=  6 NonCon=     1 RMS=3.57D-04 Max=1.47D-02 NDo=     1
 LinEq1:  Iter=  7 NonCon=     1 RMS=2.63D-04 Max=1.03D-02 NDo=     1
 LinEq1:  Iter=  8 NonCon=     1 RMS=1.33D-04 Max=5.20D-03 NDo=     1
 LinEq1:  Iter=  9 NonCon=     1 RMS=1.04D-04 Max=4.88D-03 NDo=     1
 LinEq1:  Iter= 10 NonCon=     1 RMS=3.34D-05 Max=8.49D-04 NDo=     1
 LinEq1:  Iter= 11 NonCon=     1 RMS=1.54D-05 Max=6.25D-04 NDo=     1
 LinEq1:  Iter= 12 NonCon=     1 RMS=8.53D-06 Max=3.16D-04 NDo=     1
 LinEq1:  Iter= 13 NonCon=     1 RMS=3.85D-06 Max=1.17D-04 NDo=     1
 LinEq1:  Iter= 14 NonCon=     1 RMS=2.13D-06 Max=6.83D-05 NDo=     1
 LinEq1:  Iter= 15 NonCon=     1 RMS=1.29D-06 Max=3.90D-05 NDo=     1
 LinEq1:  Iter= 16 NonCon=     1 RMS=3.42D-07 Max=8.32D-06 NDo=     1
 LinEq1:  Iter= 17 NonCon=     1 RMS=2.12D-07 Max=7.43D-06 NDo=     1
 LinEq1:  Iter= 18 NonCon=     1 RMS=1.02D-07 Max=2.97D-06 NDo=     1
 LinEq1:  Iter= 19 NonCon=     1 RMS=5.86D-08 Max=2.03D-06 NDo=     1
 LinEq1:  Iter= 20 NonCon=     1 RMS=3.22D-08 Max=9.97D-07 NDo=     1
 LinEq1:  Iter= 21 NonCon=     1 RMS=1.08D-08 Max=2.14D-07 NDo=     1
 LinEq1:  Iter= 22 NonCon=     1 RMS=5.92D-09 Max=1.70D-07 NDo=     1
 LinEq1:  Iter= 23 NonCon=     1 RMS=2.04D-09 Max=4.24D-08 NDo=     1
 LinEq1:  Iter= 24 NonCon=     1 RMS=1.23D-09 Max=4.38D-08 NDo=     1
 LinEq1:  Iter= 25 NonCon=     1 RMS=3.66D-10 Max=1.13D-08 NDo=     1
 LinEq1:  Iter= 26 NonCon=     1 RMS=1.90D-10 Max=7.26D-09 NDo=     1
 LinEq1:  Iter= 27 NonCon=     1 RMS=8.24D-11 Max=2.75D-09 NDo=     1
 LinEq1:  Iter= 28 NonCon=     0 RMS=1.92D-11 Max=6.08D-10 NDo=     1
 Linear equations converged to 1.000D-10 1.000D-09 after    28 iterations.
 End of Minotr F.D. properties file   721 does not exist.
 End of Minotr F.D. properties file   722 does not exist.
 End of Minotr F.D. properties file   788 does not exist.
 Leave Link 1002 at Sat Jan 11 22:57:01 2020, MaxMem=   183500800 cpu:      2068.0
 (Enter E:\Gaussian\G09W\l601.exe)
 Copying SCF densities to generalized density rwf, IOpCl= 0 IROHF=0.

 **********************************************************************

            Population analysis using the SCF density.

 **********************************************************************

 Orbital symmetries:
       Occupied  (A) (A) (A) (A) (A) (A) (A) (A) (A) (A) (A) (A)
                 (A) (A) (A) (A) (A) (A) (A) (A) (A) (A) (A) (A)
                 (A) (A) (A) (A) (A) (A) (A) (A) (A) (A) (A) (A)
                 (A) (A) (A) (A) (A) (A) (A) (A) (A) (A) (A) (A)
                 (A) (A) (A) (A) (A) (A) (A) (A) (A) (A) (A) (A)
                 (A) (A) (A) (A) (A) (A) (A) (A) (A) (A) (A)
       Virtual   (A) (A) (A) (A) (A) (A) (A) (A) (A) (A) (A) (A)
                 (A) (A) (A) (A) (A) (A) (A) (A) (A) (A) (A) (A)
                 (A) (A) (A) (A) (A) (A) (A) (A) (A) (A) (A) (A)
                 (A) (A) (A) (A) (A) (A) (A) (A) (A) (A) (A) (A)
                 (A) (A) (A) (A) (A) (A) (A) (A) (A) (A) (A) (A)
                 (A) (A) (A) (A) (A) (A) (A) (A) (A) (A) (A) (A)
                 (A) (A) (A) (A) (A) (A) (A) (A) (A) (A) (A) (A)
                 (A) (A) (A) (A) (A) (A) (A) (A) (A) (A) (A) (A)
                 (A) (A) (A) (A) (A) (A) (A) (A) (A) (A) (A) (A)
                 (A) (A) (A) (A) (A) (A) (A) (A) (A) (A) (A) (A)
                 (A) (A) (A) (A) (A) (A) (A) (A) (A) (A) (A) (A)
                 (A) (A) (A) (A) (A) (A) (A) (A) (A) (A) (A) (A)
                 (A) (A) (A) (A) (A) (A) (A) (A) (A) (A) (A) (A)
                 (A) (A) (A) (A) (A) (A) (A) (A) (A) (A) (A) (A)
                 (A) (A) (A) (A) (A) (A) (A) (A) (A) (A) (A) (A)
                 (A) (A) (A) (A) (A) (A) (A) (A) (A) (A) (A) (A)
                 (A) (A) (A) (A) (A) (A) (A) (A) (A) (A) (A) (A)
                 (A) (A) (A) (A) (A) (A) (A) (A) (A) (A) (A) (A)
                 (A) (A) (A) (A) (A) (A) (A) (A) (A) (A) (A) (A)
                 (A) (A) (A) (A) (A) (A) (A) (A) (A) (A) (A) (A)
                 (A) (A) (A) (A) (A) (A) (A) (A) (A) (A) (A) (A)
                 (A) (A) (A) (A) (A) (A) (A) (A) (A) (A) (A) (A)
                 (A) (A) (A) (A) (A) (A) (A) (A) (A) (A) (A) (A)
                 (A) (A) (A) (A) (A) (A)
 The electronic state is 1-A.
 Alpha  occ. eigenvalues -- -482.84542 -62.49836 -56.31872 -56.31488 -56.31465
 Alpha  occ. eigenvalues --  -19.13063 -19.12260 -10.28553 -10.27942 -10.25853
 Alpha  occ. eigenvalues --  -10.21896 -10.21550 -10.21162 -10.21151 -10.21101
 Alpha  occ. eigenvalues --  -10.21072 -10.20831 -10.20060 -10.20034 -10.19976
 Alpha  occ. eigenvalues --  -10.19931  -8.70803  -6.53950  -6.52669  -6.52608
 Alpha  occ. eigenvalues --   -2.65044  -2.64685  -2.64640  -2.63622  -2.63621
 Alpha  occ. eigenvalues --   -1.05530  -1.03716  -0.90777  -0.88945  -0.84241
 Alpha  occ. eigenvalues --   -0.80694  -0.78755  -0.78166  -0.75879  -0.70323
 Alpha  occ. eigenvalues --   -0.67259  -0.64724  -0.62451  -0.59294  -0.56780
 Alpha  occ. eigenvalues --   -0.55621  -0.51201  -0.49750  -0.49410  -0.47969
 Alpha  occ. eigenvalues --   -0.46219  -0.45825  -0.45472  -0.45265  -0.44776
 Alpha  occ. eigenvalues --   -0.43673  -0.41214  -0.40643  -0.40442  -0.38456
 Alpha  occ. eigenvalues --   -0.37874  -0.37424  -0.36808  -0.32983  -0.30854
 Alpha  occ. eigenvalues --   -0.29193  -0.28820  -0.28428  -0.27882  -0.27792
 Alpha  occ. eigenvalues --   -0.26806
 Alpha virt. eigenvalues --   -0.12988  -0.07753  -0.04337  -0.02903  -0.02127
 Alpha virt. eigenvalues --    0.03494   0.03700   0.05287   0.07028   0.08427
 Alpha virt. eigenvalues --    0.09371   0.10612   0.12153   0.12171   0.12871
 Alpha virt. eigenvalues --    0.19090   0.19789   0.20247   0.20700   0.21059
 Alpha virt. eigenvalues --    0.23718   0.24036   0.25190   0.26173   0.26645
 Alpha virt. eigenvalues --    0.27289   0.28004   0.28585   0.28952   0.30799
 Alpha virt. eigenvalues --    0.31926   0.34569   0.34989   0.36366   0.36988
 Alpha virt. eigenvalues --    0.37410   0.37483   0.37777   0.38764   0.39140
 Alpha virt. eigenvalues --    0.40190   0.40302   0.40690   0.41248   0.42299
 Alpha virt. eigenvalues --    0.42580   0.42764   0.44228   0.44517   0.44991
 Alpha virt. eigenvalues --    0.45446   0.45564   0.47668   0.47872   0.51792
 Alpha virt. eigenvalues --    0.52064   0.53419   0.54837   0.55608   0.55677
 Alpha virt. eigenvalues --    0.56070   0.57553   0.58671   0.58751   0.59484
 Alpha virt. eigenvalues --    0.59610   0.60426   0.61368   0.61521   0.62323
 Alpha virt. eigenvalues --    0.63054   0.64653   0.65221   0.65584   0.66788
 Alpha virt. eigenvalues --    0.70702   0.70842   0.71354   0.71815   0.72725
 Alpha virt. eigenvalues --    0.74261   0.75202   0.77376   0.77796   0.79197
 Alpha virt. eigenvalues --    0.80546   0.80972   0.82721   0.83274   0.84648
 Alpha virt. eigenvalues --    0.86751   0.87389   0.88439   0.90132   0.92049
 Alpha virt. eigenvalues --    0.92639   0.96118   0.96573   0.96600   0.97551
 Alpha virt. eigenvalues --    0.98288   0.99228   1.00047   1.03248   1.04310
 Alpha virt. eigenvalues --    1.08755   1.09062   1.09340   1.10742   1.10974
 Alpha virt. eigenvalues --    1.11509   1.12259   1.14431   1.15241   1.15735
 Alpha virt. eigenvalues --    1.17472   1.18544   1.19683   1.22660   1.24391
 Alpha virt. eigenvalues --    1.25261   1.26478   1.27776   1.29601   1.32258
 Alpha virt. eigenvalues --    1.39033   1.41666   1.43369   1.45093   1.45529
 Alpha virt. eigenvalues --    1.46570   1.46818   1.49640   1.52205   1.53429
 Alpha virt. eigenvalues --    1.55585   1.56609   1.56944   1.57544   1.64467
 Alpha virt. eigenvalues --    1.66043   1.68105   1.69455   1.70059   1.73325
 Alpha virt. eigenvalues --    1.77188   1.77438   1.78553   1.80702   1.81557
 Alpha virt. eigenvalues --    1.82239   1.83436   1.83901   1.84370   1.86375
 Alpha virt. eigenvalues --    1.87470   1.87854   1.88422   1.89998   1.90740
 Alpha virt. eigenvalues --    1.90985   1.91714   1.94042   1.95323   1.97193
 Alpha virt. eigenvalues --    2.01039   2.06326   2.07674   2.13800   2.16923
 Alpha virt. eigenvalues --    2.18704   2.19769   2.24335   2.25376   2.26571
 Alpha virt. eigenvalues --    2.29380   2.30910   2.31589   2.32779   2.33548
 Alpha virt. eigenvalues --    2.35221   2.36246   2.39034   2.45912   2.46286
 Alpha virt. eigenvalues --    2.51022   2.51064   2.53773   2.55447   2.56514
 Alpha virt. eigenvalues --    2.57856   2.64859   2.65246   2.69024   2.72311
 Alpha virt. eigenvalues --    2.72815   2.76293   2.78716   2.79124   2.81083
 Alpha virt. eigenvalues --    2.81657   2.83114   2.87984   2.88852   2.91280
 Alpha virt. eigenvalues --    2.92208   2.96810   2.97491   3.02772   3.04098
 Alpha virt. eigenvalues --    3.05822   3.11400   3.12982   3.15384   3.16401
 Alpha virt. eigenvalues --    3.18598   3.23298   3.24428   3.25399   3.26170
 Alpha virt. eigenvalues --    3.27414   3.28185   3.28958   3.30094   3.31411
 Alpha virt. eigenvalues --    3.35390   3.39088   3.41798   3.43932   3.44598
 Alpha virt. eigenvalues --    3.50214   3.51326   3.52409   3.55943   3.67251
 Alpha virt. eigenvalues --    3.68299   3.74096   3.80397   3.90576   3.93674
 Alpha virt. eigenvalues --    4.10879   4.11051   4.12431   4.15584   4.19876
 Alpha virt. eigenvalues --    4.35678   4.36508   4.53306   4.74233   4.76968
 Alpha virt. eigenvalues --    4.78123   4.86121   4.88227   5.05503   5.07430
 Alpha virt. eigenvalues --    5.57039   5.69772   6.46857   7.44920   7.52250
 Alpha virt. eigenvalues --    7.61930  23.17131  23.34725  23.74338  23.75607
 Alpha virt. eigenvalues --   23.76971  23.84200  23.84604  23.86658  23.97590
 Alpha virt. eigenvalues --   23.99385  24.02244  24.02699  24.09826  24.11345
 Alpha virt. eigenvalues --   47.75951  49.94208  49.95643 289.64799 289.72033
 Alpha virt. eigenvalues --  289.839831020.50804
          Condensed to atoms (all electrons):
               1          2          3          4          5          6
     1  C    4.990207   0.483236  -0.031216  -0.048724  -0.029290   0.479964
     2  C    0.483236   5.118388   0.398714  -0.101215  -0.057456  -0.030575
     3  C   -0.031216   0.398714   5.560330   0.424743  -0.090607  -0.050088
     4  C   -0.048724  -0.101215   0.424743   5.524306   0.400935  -0.031894
     5  C   -0.029290  -0.057456  -0.090607   0.400935   5.107822   0.490530
     6  C    0.479964  -0.030575  -0.050088  -0.031894   0.490530   4.982163
     7  H    0.399200  -0.041564   0.007345   0.000176   0.005894  -0.041916
     8  H   -0.038633   0.401549  -0.062458   0.004348  -0.000998   0.006732
     9  H    0.006728  -0.001034   0.004733  -0.064717   0.402459  -0.038376
    10  H   -0.042342   0.006101  -0.000054   0.007278  -0.042213   0.400380
    11  C   -0.002139   0.011594   0.045844   0.161493  -0.072366   0.012164
    12  O    0.000003  -0.000024   0.004790  -0.153518   0.019978   0.001197
    13  C    0.013620  -0.075339   0.126881   0.061251   0.011526  -0.002034
    14  C    0.000557  -0.005858  -0.145941  -0.026564   0.034767  -0.000778
    15  C   -0.000772   0.036765  -0.021202  -0.147117  -0.004963   0.000520
    16  C    0.000005   0.000088  -0.005121   0.034945  -0.001394  -0.000012
    17  C   -0.000015  -0.001197   0.037390  -0.006021   0.000085   0.000005
    18  C    0.000000   0.000007   0.000570  -0.000726  -0.000019   0.000000
    19  H    0.000001  -0.000001  -0.000273   0.004661  -0.000174  -0.000004
    20  C    0.000000  -0.000017  -0.000804   0.000619   0.000006   0.000000
    21  H   -0.000004  -0.000151   0.004320  -0.000274  -0.000001   0.000001
    22  H    0.000000   0.000000  -0.000024   0.000009   0.000000   0.000000
    23  Br   0.000000   0.000000   0.000002  -0.000006   0.000000   0.000000
    24  O    0.001415   0.020990  -0.164826   0.005246  -0.000057   0.000005
               7          8          9         10         11         12
     1  C    0.399200  -0.038633   0.006728  -0.042342  -0.002139   0.000003
     2  C   -0.041564   0.401549  -0.001034   0.006101   0.011594  -0.000024
     3  C    0.007345  -0.062458   0.004733  -0.000054   0.045844   0.004790
     4  C    0.000176   0.004348  -0.064717   0.007278   0.161493  -0.153518
     5  C    0.005894  -0.000998   0.402459  -0.042213  -0.072366   0.019978
     6  C   -0.041916   0.006732  -0.038376   0.400380   0.012164   0.001197
     7  H    0.452237  -0.006251  -0.000235  -0.005471   0.000027   0.000000
     8  H   -0.006251   0.454449   0.000072  -0.000231   0.000101   0.000003
     9  H   -0.000235   0.000072   0.457353  -0.006135  -0.011057   0.022791
    10  H   -0.005471  -0.000231  -0.006135   0.451967  -0.000342  -0.000046
    11  C    0.000027   0.000101  -0.011057  -0.000342   4.777617   0.752407
    12  O    0.000000   0.000003   0.022791  -0.000046   0.752407   7.797743
    13  C   -0.000400  -0.010525   0.000099   0.000023  -0.065975  -0.001408
    14  C    0.000009  -0.000276   0.004522  -0.000023   0.127483  -0.160245
    15  C   -0.000024   0.004360  -0.000261   0.000011   0.048889   0.004768
    16  C    0.000000  -0.000001  -0.000181   0.000000  -0.065190   0.022090
    17  C    0.000000  -0.000150  -0.000001   0.000000   0.011100  -0.000033
    18  C    0.000000   0.000001  -0.000006   0.000000   0.013130   0.001922
    19  H    0.000000  -0.000001  -0.000081   0.000000  -0.009961   0.024660
    20  C    0.000000  -0.000005   0.000001   0.000000  -0.001931   0.000019
    21  H    0.000000  -0.000077  -0.000001   0.000000   0.000084   0.000003
    22  H    0.000000   0.000000   0.000000   0.000000   0.000016   0.000000
    23  Br   0.000000   0.000000   0.000000   0.000000  -0.000386  -0.000001
    24  O   -0.000058   0.023762   0.000003   0.000000  -0.001216   0.000000
              13         14         15         16         17         18
     1  C    0.013620   0.000557  -0.000772   0.000005  -0.000015   0.000000
     2  C   -0.075339  -0.005858   0.036765   0.000088  -0.001197   0.000007
     3  C    0.126881  -0.145941  -0.021202  -0.005121   0.037390   0.000570
     4  C    0.061251  -0.026564  -0.147117   0.034945  -0.006021  -0.000726
     5  C    0.011526   0.034767  -0.004963  -0.001394   0.000085  -0.000019
     6  C   -0.002034  -0.000778   0.000520  -0.000012   0.000005   0.000000
     7  H   -0.000400   0.000009  -0.000024   0.000000   0.000000   0.000000
     8  H   -0.010525  -0.000276   0.004360  -0.000001  -0.000150   0.000001
     9  H    0.000099   0.004522  -0.000261  -0.000181  -0.000001  -0.000006
    10  H    0.000023  -0.000023   0.000011   0.000000   0.000000   0.000000
    11  C   -0.065975   0.127483   0.048889  -0.065190   0.011100   0.013130
    12  O   -0.001408  -0.160245   0.004768   0.022090  -0.000033   0.001922
    13  C    4.840291   0.063601   0.117806   0.012152  -0.075436  -0.002114
    14  C    0.063601   5.574908   0.424603   0.374577  -0.099929  -0.019380
    15  C    0.117806   0.424603   5.577728  -0.098268   0.387890  -0.052763
    16  C    0.012152   0.374577  -0.098268   5.198583  -0.056952   0.428385
    17  C   -0.075436  -0.099929   0.387890  -0.056952   5.119240  -0.015901
    18  C   -0.002114  -0.019380  -0.052763   0.428385  -0.015901   5.122166
    19  H    0.000143  -0.061537   0.004567   0.399701  -0.001432  -0.045068
    20  C    0.014433  -0.048057  -0.030456  -0.032342   0.471874   0.437470
    21  H   -0.009795   0.003936  -0.061270  -0.000804   0.400339   0.006757
    22  H   -0.000323  -0.000293   0.007411   0.006145  -0.036634  -0.049231
    23  Br   0.000017   0.009671  -0.000370  -0.087995   0.007913   0.294437
    24  O    0.749206   0.005232  -0.166479  -0.000048   0.021861  -0.000005
              19         20         21         22         23         24
     1  C    0.000001   0.000000  -0.000004   0.000000   0.000000   0.001415
     2  C   -0.000001  -0.000017  -0.000151   0.000000   0.000000   0.020990
     3  C   -0.000273  -0.000804   0.004320  -0.000024   0.000002  -0.164826
     4  C    0.004661   0.000619  -0.000274   0.000009  -0.000006   0.005246
     5  C   -0.000174   0.000006  -0.000001   0.000000   0.000000  -0.000057
     6  C   -0.000004   0.000000   0.000001   0.000000   0.000000   0.000005
     7  H    0.000000   0.000000   0.000000   0.000000   0.000000  -0.000058
     8  H   -0.000001  -0.000005  -0.000077   0.000000   0.000000   0.023762
     9  H   -0.000081   0.000001  -0.000001   0.000000   0.000000   0.000003
    10  H    0.000000   0.000000   0.000000   0.000000   0.000000   0.000000
    11  C   -0.009961  -0.001931   0.000084   0.000016  -0.000386  -0.001216
    12  O    0.024660   0.000019   0.000003   0.000000  -0.000001   0.000000
    13  C    0.000143   0.014433  -0.009795  -0.000323   0.000017   0.749206
    14  C   -0.061537  -0.048057   0.003936  -0.000293   0.009671   0.005232
    15  C    0.004567  -0.030456  -0.061270   0.007411  -0.000370  -0.166479
    16  C    0.399701  -0.032342  -0.000804   0.006145  -0.087995  -0.000048
    17  C   -0.001432   0.471874   0.400339  -0.036634   0.007913   0.021861
    18  C   -0.045068   0.437470   0.006757  -0.049231   0.294437  -0.000005
    19  H    0.442752   0.007165   0.000067  -0.000130  -0.005106   0.000003
    20  C    0.007165   5.036708  -0.038018   0.399863  -0.079628   0.001555
    21  H    0.000067  -0.038018   0.445947  -0.006266  -0.000223   0.023630
    22  H   -0.000130   0.399863  -0.006266   0.435211  -0.004387  -0.000055
    23  Br  -0.005106  -0.079628  -0.000223  -0.004387  34.870603   0.000000
    24  O    0.000003   0.001555   0.023630  -0.000055   0.000000   7.842988
 Mulliken charges:
               1
     1  C   -0.181799
     2  C   -0.162998
     3  C   -0.043049
     4  C   -0.049234
     5  C   -0.174463
     6  C   -0.177985
     7  H    0.231031
     8  H    0.224230
     9  H    0.223324
    10  H    0.231096
    11  C    0.268613
    12  O   -0.337098
    13  C    0.232297
    14  C   -0.054985
    15  C   -0.031374
    16  C   -0.128362
    17  C   -0.163997
    18  C   -0.119632
    19  H    0.240049
    20  C   -0.138457
    21  H    0.231800
    22  H    0.248688
    23  Br  -0.004542
    24  O   -0.363154
 Sum of Mulliken charges =   0.00000
 Mulliken charges with hydrogens summed into heavy atoms:
               1
     1  C    0.049233
     2  C    0.061232
     3  C   -0.043049
     4  C   -0.049234
     5  C    0.048861
     6  C    0.053111
    11  C    0.268613
    12  O   -0.337098
    13  C    0.232297
    14  C   -0.054985
    15  C   -0.031374
    16  C    0.111687
    17  C    0.067804
    18  C   -0.119632
    20  C    0.110232
    23  Br  -0.004542
    24  O   -0.363154
 Electronic spatial extent (au):  <R**2>=           6196.9049
 Charge=              0.0000 electrons
 Dipole moment (field-independent basis, Debye):
    X=              2.1253    Y=              0.3120    Z=             -0.0002  Tot=              2.1481
 Quadrupole moment (field-independent basis, Debye-Ang):
   XX=            -83.6757   YY=           -117.4279   ZZ=           -111.4513
   XY=            -10.6512   XZ=              0.0006   YZ=              0.0013
 Traceless Quadrupole moment (field-independent basis, Debye-Ang):
   XX=             20.5092   YY=            -13.2429   ZZ=             -7.2663
   XY=            -10.6512   XZ=              0.0006   YZ=              0.0013
 Octapole moment (field-independent basis, Debye-Ang**2):
  XXX=             17.5008  YYY=            -14.7964  ZZZ=             -0.0029  XYY=            -63.7075
  XXY=            -24.4854  XXZ=             -0.0007  XZZ=            -49.0751  YZZ=             -4.5107
  YYZ=             -0.0034  XYZ=              0.0020
 Hexadecapole moment (field-independent basis, Debye-Ang**3):
 XXXX=          -4937.6310 YYYY=          -1447.1523 ZZZZ=           -121.6006 XXXY=            -25.9431
 XXXZ=             -0.0526 YYYX=            -52.8141 YYYZ=              0.0507 ZZZX=             -0.0638
 ZZZY=              0.0389 XXYY=          -1126.0760 XXZZ=          -1077.3980 YYZZ=           -249.5262
 XXYZ=              0.0071 YYXZ=             -0.0135 ZZXY=             28.2514
 N-N= 1.372767195167D+03 E-N=-1.050174872115D+04  KE= 3.256682760834D+03
 No NMR shielding tensors so no spin-rotation constants.
 Leave Link  601 at Sat Jan 11 22:57:03 2020, MaxMem=   183500800 cpu:         1.0
 (Enter E:\Gaussian\G09W\l701.exe)
 Compute integral first derivatives.
 ... and contract with generalized density number  6.
 R6Disp: Adding Grimme-D3(BJ) dispersion energy 1st derivatives to the gradient.
 D1PCM: PCM CHGder 1st derivatives, ID1Alg=3 FixD1E=F DoIter=F DoCFld=F I1PDM=6.
 Leave Link  701 at Sat Jan 11 22:57:55 2020, MaxMem=   183500800 cpu:        51.0
 (Enter E:\Gaussian\G09W\l702.exe)
 L702 exits ... SP integral derivatives will be done elsewhere.
 Leave Link  702 at Sat Jan 11 22:57:55 2020, MaxMem=   183500800 cpu:         0.0
 (Enter E:\Gaussian\G09W\l703.exe)
 Compute integral first derivatives, UseDBF=F ICtDFT=           0.
 Integral derivatives from FoFJK, PRISM(SPDF).
 Calling FoFJK, ICntrl=  10005127 FMM=F ISym2X=0 I1Cent= 0 IOpClX= 0 NMat=1 NMatS=1 NMatT=0.
 FoFJK:  IHMeth= 1 ICntrl=10005127 DoSepK=F KAlg= 0 I1Cent=   0 FoldK=F
 IRaf=         0 NMat=   1 IRICut=       1 DoRegI=T DoRafI=F ISym2E= 0.
 FoFCou: FMM=F IPFlag=           0 FMFlag=      100000 FMFlg1=         800
         NFxFlg=           0 DoJE=F BraDBF=F KetDBF=F FulRan=T
         wScrn=  0.000000 ICntrl=10005127 IOpCl=  0 I1Cent=           0 NGrid=           0
         NMat0=    1 NMatS0=      1 NMatT0=    0 NMatD0=    1 NMtDS0=    0 NMtDT0=    0
 Symmetry not used in FoFCou.
 Leave Link  703 at Sat Jan 11 23:01:41 2020, MaxMem=   183500800 cpu:       225.0
 (Enter E:\Gaussian\G09W\l716.exe)
 Dipole        = 1.17488438D+00 1.19129641D+00-1.50087434D-04
 ***** Axes restored to original set *****
 -------------------------------------------------------------------
 Center     Atomic                   Forces (Hartrees/Bohr)
 Number     Number              X              Y              Z
 -------------------------------------------------------------------
      1        6           0.000864648    0.000269102   -0.000000343
      2        6          -0.000124785   -0.000585770    0.000002834
      3        6           0.000090643    0.000123983   -0.000004854
      4        6          -0.000310736    0.000144877    0.000004618
      5        6           0.000034441    0.000805005   -0.000003676
      6        6           0.000809511    0.000201251    0.000001123
      7        1           0.000346632   -0.000116508   -0.000000935
      8        1           0.000225336   -0.000326576   -0.000000066
      9        1           0.000529840    0.000476483   -0.000000171
     10        1           0.000292025    0.000223939    0.000000535
     11        6           0.000763481   -0.003517916   -0.000005094
     12        8          -0.000696876    0.003556806    0.000003314
     13        6           0.000294230   -0.001258336    0.000006935
     14        6           0.000282494    0.000090818    0.000005261
     15        6          -0.000276686    0.000238470   -0.000005345
     16        6          -0.000657678    0.000373606   -0.000003347
     17        6           0.000467193   -0.000458595    0.000002645
     18        6          -0.000718651   -0.000218070    0.000000596
     19        1          -0.000489568    0.000276815   -0.000000310
     20        6          -0.000840853    0.000379676    0.000000289
     21        1          -0.000061640   -0.000402946   -0.000000197
     22        1          -0.000188315   -0.000384119   -0.000000786
     23       35          -0.000639242    0.000264129    0.000000218
     24        8           0.000004555   -0.000156124   -0.000003244
 -------------------------------------------------------------------
 Cartesian Forces:  Max     0.003556806 RMS     0.000698910
 Leave Link  716 at Sat Jan 11 23:01:42 2020, MaxMem=   183500800 cpu:         0.0
 (Enter E:\Gaussian\G09W\l103.exe)

 GradGradGradGradGradGradGradGradGradGradGradGradGradGradGradGradGradGrad
 Berny optimization.
 FormGI is forming the generalized inverse of G from B-inverse, IUseBI=4.
 Internal  Forces:  Max     0.003624073 RMS     0.000601225
 Search for a local minimum.
 Step number   1 out of a maximum of  142
 All quantities printed in internal units (Hartrees-Bohrs-Radians)
 RMS Force = .60123D-03 SwitMx=.10000D-02 MixMth= 2
 Mixed Optimization -- En-DIIS/RFO-DIIS
 Second derivative matrix not updated -- first step.
 ITU=  0
     Eigenvalues ---    0.01175   0.01287   0.01432   0.01618   0.01648
     Eigenvalues ---    0.01728   0.01756   0.01818   0.01841   0.02065
     Eigenvalues ---    0.02074   0.02078   0.02091   0.02140   0.02157
     Eigenvalues ---    0.02159   0.02180   0.02182   0.02206   0.02233
     Eigenvalues ---    0.02260   0.16000   0.16000   0.16000   0.16000
     Eigenvalues ---    0.16000   0.16000   0.16000   0.17579   0.22000
     Eigenvalues ---    0.22430   0.22577   0.23519   0.24495   0.24621
     Eigenvalues ---    0.25000   0.25000   0.25000   0.25000   0.25000
     Eigenvalues ---    0.25000   0.34558   0.34857   0.35456   0.35466
     Eigenvalues ---    0.35481   0.35482   0.35510   0.35639   0.35657
     Eigenvalues ---    0.37213   0.37665   0.39186   0.40445   0.41167
     Eigenvalues ---    0.41252   0.43382   0.43870   0.44243   0.44283
     Eigenvalues ---    0.47170   0.47636   0.48270   0.48724   0.75809
     Eigenvalues ---    0.85225
 RFO step:  Lambda=-1.09236444D-04 EMin= 1.17487223D-02
 Linear search not attempted -- first point.
 Iteration  1 RMS(Cart)=  0.00455958 RMS(Int)=  0.00000286
 Iteration  2 RMS(Cart)=  0.00000324 RMS(Int)=  0.00000014
 Iteration  3 RMS(Cart)=  0.00000000 RMS(Int)=  0.00000014
 ITry= 1 IFail=0 DXMaxC= 2.05D-02 DCOld= 1.00D+10 DXMaxT= 3.00D-01 DXLimC= 3.00D+00 Rises=F
 Variable       Old X    -DE/DX   Delta X   Delta X   Delta X     New X
                                 (Linear)    (Quad)   (Total)
    R1        2.60984  -0.00129   0.00000  -0.00257  -0.00257   2.60727
    R2        2.65812  -0.00052   0.00000  -0.00113  -0.00113   2.65699
    R3        2.04941  -0.00036   0.00000  -0.00102  -0.00102   2.04838
    R4        2.67112  -0.00122   0.00000  -0.00279  -0.00279   2.66832
    R5        2.04899  -0.00036   0.00000  -0.00101  -0.00101   2.04799
    R6        2.66978  -0.00104   0.00000  -0.00244  -0.00244   2.66734
    R7        2.74360  -0.00153   0.00000  -0.00405  -0.00405   2.73955
    R8        2.65900  -0.00212   0.00000  -0.00484  -0.00484   2.65416
    R9        2.77517  -0.00134   0.00000  -0.00371  -0.00371   2.77147
   R10        2.61504  -0.00116   0.00000  -0.00240  -0.00240   2.61264
   R11        2.04855  -0.00036   0.00000  -0.00100  -0.00100   2.04755
   R12        2.04926  -0.00037   0.00000  -0.00104  -0.00104   2.04821
   R13        2.35215  -0.00362   0.00000  -0.00425  -0.00425   2.34790
   R14        2.77717  -0.00142   0.00000  -0.00392  -0.00392   2.77325
   R15        2.73515  -0.00157   0.00000  -0.00409  -0.00409   2.73106
   R16        2.40258  -0.00015   0.00000  -0.00020  -0.00020   2.40238
   R17        2.66914  -0.00080   0.00000  -0.00186  -0.00186   2.66728
   R18        2.65737  -0.00221   0.00000  -0.00501  -0.00501   2.65235
   R19        2.67229  -0.00101   0.00000  -0.00231  -0.00231   2.66999
   R20        2.60876  -0.00103   0.00000  -0.00211  -0.00211   2.60664
   R21        2.04651  -0.00036   0.00000  -0.00100  -0.00100   2.04550
   R22        2.60547  -0.00135   0.00000  -0.00268  -0.00268   2.60279
   R23        2.04901  -0.00039   0.00000  -0.00109  -0.00109   2.04792
   R24        2.65815  -0.00042   0.00000  -0.00091  -0.00091   2.65724
   R25        3.61711  -0.00069   0.00000  -0.00390  -0.00390   3.61321
   R26        2.04622  -0.00040   0.00000  -0.00112  -0.00112   2.04510
    A1        2.09703   0.00000   0.00000   0.00023   0.00023   2.09725
    A2        2.08998  -0.00001   0.00000  -0.00019  -0.00018   2.08980
    A3        2.09618   0.00001   0.00000  -0.00004  -0.00004   2.09614
    A4        2.09703  -0.00028   0.00000  -0.00108  -0.00108   2.09595
    A5        2.10768   0.00031   0.00000   0.00159   0.00159   2.10927
    A6        2.07848  -0.00003   0.00000  -0.00052  -0.00052   2.07796
    A7        2.09333   0.00011   0.00000   0.00045   0.00045   2.09378
    A8        2.08835  -0.00012   0.00000  -0.00039  -0.00039   2.08796
    A9        2.10150   0.00001   0.00000  -0.00006  -0.00006   2.10144
   A10        2.07228   0.00028   0.00000   0.00096   0.00096   2.07324
   A11        2.13095   0.00046   0.00000   0.00188   0.00188   2.13283
   A12        2.07996  -0.00074   0.00000  -0.00284  -0.00284   2.07712
   A13        2.11026  -0.00011   0.00000  -0.00065  -0.00065   2.10960
   A14        2.05949  -0.00057   0.00000  -0.00361  -0.00361   2.05589
   A15        2.11343   0.00069   0.00000   0.00426   0.00426   2.11770
   A16        2.09645   0.00000   0.00000   0.00010   0.00010   2.09654
   A17        2.09450   0.00001   0.00000   0.00005   0.00005   2.09455
   A18        2.09224  -0.00002   0.00000  -0.00014  -0.00014   2.09210
   A19        2.13172   0.00043   0.00000   0.00168   0.00168   2.13340
   A20        2.02496  -0.00074   0.00000  -0.00290  -0.00290   2.02207
   A21        2.12650   0.00031   0.00000   0.00121   0.00121   2.12771
   A22        2.07487  -0.00012   0.00000  -0.00056  -0.00056   2.07431
   A23        2.10409   0.00003   0.00000   0.00018   0.00019   2.10428
   A24        2.10422   0.00008   0.00000   0.00038   0.00038   2.10460
   A25        2.13048   0.00050   0.00000   0.00212   0.00212   2.13259
   A26        2.07279  -0.00079   0.00000  -0.00311  -0.00311   2.06968
   A27        2.07991   0.00028   0.00000   0.00099   0.00099   2.08091
   A28        2.10361  -0.00011   0.00000  -0.00048  -0.00048   2.10313
   A29        2.09101  -0.00005   0.00000  -0.00021  -0.00021   2.09079
   A30        2.08857   0.00017   0.00000   0.00070   0.00070   2.08926
   A31        2.09275  -0.00028   0.00000  -0.00139  -0.00139   2.09137
   A32        2.06520  -0.00030   0.00000  -0.00209  -0.00209   2.06311
   A33        2.12523   0.00059   0.00000   0.00347   0.00347   2.12870
   A34        2.10658  -0.00029   0.00000  -0.00111  -0.00111   2.10547
   A35        2.08147   0.00001   0.00000  -0.00033  -0.00033   2.08114
   A36        2.09513   0.00029   0.00000   0.00144   0.00144   2.09657
   A37        2.12120   0.00028   0.00000   0.00123   0.00123   2.12243
   A38        2.08387  -0.00007   0.00000  -0.00032  -0.00032   2.08354
   A39        2.07812  -0.00021   0.00000  -0.00091  -0.00091   2.07722
   A40        2.07736  -0.00015   0.00000  -0.00042  -0.00042   2.07694
   A41        2.10042   0.00025   0.00000   0.00132   0.00132   2.10174
   A42        2.10540  -0.00010   0.00000  -0.00089  -0.00089   2.10451
    D1       -0.00002   0.00000   0.00000   0.00002   0.00002   0.00000
    D2       -3.14159   0.00000   0.00000  -0.00001  -0.00001  -3.14159
    D3        3.14156   0.00000   0.00000   0.00003   0.00003   3.14159
    D4       -0.00001   0.00000   0.00000   0.00000   0.00000   0.00000
    D5        0.00001   0.00000   0.00000  -0.00002  -0.00002  -0.00001
    D6       -3.14159   0.00000   0.00000  -0.00001  -0.00001   3.14159
    D7       -3.14157   0.00000   0.00000  -0.00003  -0.00003   3.14159
    D8        0.00002   0.00000   0.00000  -0.00002  -0.00002   0.00000
    D9        0.00004   0.00000   0.00000  -0.00004  -0.00004   0.00000
   D10       -3.14157   0.00000   0.00000  -0.00001  -0.00001  -3.14158
   D11       -3.14157   0.00000   0.00000  -0.00001  -0.00001  -3.14159
   D12        0.00000   0.00000   0.00000   0.00002   0.00002   0.00001
   D13       -0.00006   0.00000   0.00000   0.00005   0.00005   0.00000
   D14        3.14157   0.00000   0.00000   0.00000   0.00000   3.14157
   D15        3.14156   0.00000   0.00000   0.00002   0.00002   3.14158
   D16        0.00000   0.00000   0.00000  -0.00003  -0.00003  -0.00003
   D17        3.14157   0.00000   0.00000   0.00003   0.00003  -3.14158
   D18        0.00006   0.00000   0.00000  -0.00013  -0.00013  -0.00007
   D19       -0.00004   0.00000   0.00000   0.00006   0.00006   0.00002
   D20       -3.14155   0.00000   0.00000  -0.00010  -0.00010   3.14153
   D21        0.00005   0.00000   0.00000  -0.00005  -0.00005   0.00000
   D22       -3.14157   0.00000   0.00000  -0.00003  -0.00003   3.14159
   D23       -3.14158   0.00000   0.00000   0.00000   0.00000  -3.14158
   D24       -0.00001   0.00000   0.00000   0.00002   0.00002   0.00001
   D25       -3.14152   0.00000   0.00000  -0.00009  -0.00009   3.14157
   D26        0.00004   0.00000   0.00000   0.00000   0.00000   0.00004
   D27        0.00011   0.00000   0.00000  -0.00014  -0.00014  -0.00004
   D28       -3.14152   0.00000   0.00000  -0.00005  -0.00005  -3.14157
   D29       -0.00002   0.00000   0.00000   0.00003   0.00003   0.00001
   D30        3.14157   0.00000   0.00000   0.00002   0.00002  -3.14159
   D31       -3.14159   0.00000   0.00000   0.00001   0.00001  -3.14158
   D32        0.00000   0.00000   0.00000   0.00000   0.00000   0.00000
   D33       -0.00004   0.00000   0.00000   0.00000   0.00000  -0.00004
   D34        3.14151   0.00000   0.00000   0.00006   0.00006   3.14157
   D35        3.14152   0.00000   0.00000   0.00009   0.00009  -3.14157
   D36       -0.00011   0.00000   0.00000   0.00015   0.00015   0.00004
   D37        0.00005   0.00000   0.00000  -0.00006  -0.00006  -0.00002
   D38       -3.14158   0.00000   0.00000  -0.00003  -0.00003   3.14158
   D39        3.14155   0.00000   0.00000   0.00010   0.00010  -3.14153
   D40       -0.00007   0.00000   0.00000   0.00013   0.00013   0.00006
   D41       -0.00001   0.00000   0.00000   0.00003   0.00003   0.00003
   D42       -3.14157   0.00000   0.00000   0.00000   0.00000  -3.14157
   D43       -3.14156   0.00000   0.00000  -0.00003  -0.00003  -3.14158
   D44        0.00007   0.00000   0.00000  -0.00006  -0.00006   0.00001
   D45        3.14158   0.00000   0.00000   0.00000   0.00000   3.14158
   D46        0.00001   0.00000   0.00000  -0.00002  -0.00002  -0.00001
   D47       -0.00005   0.00000   0.00000   0.00005   0.00005   0.00000
   D48        3.14156   0.00000   0.00000   0.00004   0.00004  -3.14159
   D49        3.14158   0.00000   0.00000   0.00000   0.00000   3.14158
   D50        0.00001   0.00000   0.00000  -0.00002  -0.00002  -0.00001
   D51       -0.00005   0.00000   0.00000   0.00004   0.00004  -0.00001
   D52        3.14157   0.00000   0.00000   0.00002   0.00002   3.14159
   D53        0.00002   0.00000   0.00000  -0.00002  -0.00002   0.00000
   D54       -3.14158   0.00000   0.00000  -0.00002  -0.00002   3.14159
   D55        3.14159   0.00000   0.00000  -0.00001  -0.00001   3.14158
   D56        0.00000   0.00000   0.00000   0.00000   0.00000  -0.00001
   D57        0.00001   0.00000   0.00000  -0.00001  -0.00001   0.00000
   D58       -3.14157   0.00000   0.00000  -0.00003  -0.00003  -3.14159
   D59        3.14158   0.00000   0.00000   0.00001   0.00001  -3.14159
   D60        0.00000   0.00000   0.00000   0.00000   0.00000   0.00000
   D61        0.00000   0.00000   0.00000   0.00000   0.00000   0.00000
   D62        3.14158   0.00000   0.00000   0.00002   0.00002  -3.14159
   D63       -3.14159   0.00000   0.00000   0.00000   0.00000  -3.14159
   D64       -0.00001   0.00000   0.00000   0.00001   0.00001   0.00000
         Item               Value     Threshold  Converged?
 Maximum Force            0.003624     0.000450     NO 
 RMS     Force            0.000601     0.000300     NO 
 Maximum Displacement     0.020453     0.001800     NO 
 RMS     Displacement     0.004559     0.001200     NO 
 Predicted change in Energy=-5.463504D-05
 Lowest energy point so far.  Saving SCF results.
 GradGradGradGradGradGradGradGradGradGradGradGradGradGradGradGradGradGrad

 Leave Link  103 at Sat Jan 11 23:01:43 2020, MaxMem=   183500800 cpu:         0.0
 (Enter E:\Gaussian\G09W\l202.exe)
                          Input orientation:                          
 ---------------------------------------------------------------------
 Center     Atomic      Atomic             Coordinates (Angstroms)
 Number     Number       Type             X           Y           Z
 ---------------------------------------------------------------------
      1          6           0       -3.691132    0.256369   -0.000019
      2          6           0       -2.664437    1.178046    0.000040
      3          6           0       -1.321501    0.741798    0.000028
      4          6           0       -1.028789   -0.639011   -0.000051
      5          6           0       -2.092704   -1.555947   -0.000111
      6          6           0       -3.404785   -1.120184   -0.000090
      7          1           0       -4.719980    0.597601   -0.000009
      8          1           0       -2.872380    2.241657    0.000097
      9          1           0       -1.849650   -2.611851   -0.000174
     10          1           0       -4.213291   -1.842046   -0.000134
     11          6           0        0.347308   -1.146226   -0.000092
     12          8           0        0.605663   -2.361522   -0.000138
     13          6           0       -0.250486    1.718827    0.000108
     14          6           0        1.404557   -0.128432    0.000004
     15          6           0        1.117799    1.253596    0.000085
     16          6           0        2.743123   -0.550613   -0.000004
     17          6           0        2.177172    2.188478    0.000149
     18          6           0        3.757365    0.384261    0.000066
     19          1           0        2.944140   -1.614216   -0.000069
     20          6           0        3.487561    1.764286    0.000141
     21          1           0        1.948391    3.247765    0.000206
     22          1           0        4.296320    2.483387    0.000192
     23         35           0        5.576290   -0.205115    0.000060
     24          8           0       -0.510594    2.963216    0.000115
 ---------------------------------------------------------------------
                    Distance matrix (angstroms):
                    1          2          3          4          5
     1  C    0.000000
     2  C    1.379707   0.000000
     3  C    2.418841   1.412016   0.000000
     4  C    2.808875   2.444798   1.411493   0.000000
     5  C    2.416498   2.793133   2.423713   1.404523   0.000000
     6  C    1.406020   2.414533   2.794109   2.424228   1.382550
     7  H    1.083958   2.135924   3.401536   3.892826   3.397108
     8  H    2.147492   1.083748   2.157499   3.420099   3.876815
     9  H    3.408482   3.876493   3.394982   2.136799   1.083517
    10  H    2.162405   3.394098   3.877976   3.404166   2.139800
    11  C    4.275076   3.804319   2.519833   1.466598   2.474172
    12  O    5.031481   4.818930   3.653020   2.374547   2.816049
    13  C    3.738559   2.473783   1.449710   2.482973   3.757380
    14  C    5.110198   4.273593   2.861590   2.486336   3.777385
    15  C    4.911241   3.782991   2.492413   2.861783   4.266247
    16  C    6.484663   5.677144   4.265149   3.772947   4.939222
    17  C    6.178190   4.945922   3.785974   4.274679   5.679133
    18  C    7.449596   6.470675   5.091436   4.894319   6.163418
    19  H    6.893905   6.265210   4.873038   4.090867   5.037181
    20  C    7.335357   6.179867   4.916561   5.115981   6.493328
    21  H    6.383782   5.055880   4.119717   4.895981   6.277428
    22  H    8.292104   7.082093   5.881585   6.173018   7.558825
    23  Br   9.278905   8.355998   6.962483   6.619315   7.787054
    24  O    4.176463   2.797476   2.364798   3.639309   4.788101
                    6          7          8          9         10
     6  C    0.000000
     7  H    2.163451   0.000000
     8  H    3.403737   2.473165   0.000000
     9  H    2.154882   4.305737   4.960093   0.000000
    10  H    1.083867   2.491708   4.298218   2.485840   0.000000
    11  C    3.752183   5.358949   4.673771   2.640962   4.613375
    12  O    4.198167   6.092526   5.769405   2.468041   4.846872
    13  C    4.243769   4.607984   2.673514   4.616503   5.327629
    14  C    4.910534   6.167420   4.889736   4.093560   5.873389
    15  C    5.107699   5.874520   4.110692   4.873134   6.164700
    16  C    6.174235   7.550913   6.271414   5.034110   7.075273
    17  C    6.488873   7.078247   5.049831   6.265656   7.555338
    18  C    7.318452   8.480029   6.885015   6.357304   8.275736
    19  H    6.368117   7.976896   6.978514   4.896499   7.161056
    20  C    7.471586   8.290047   6.377832   6.901913   8.503456
    21  H    6.909086   7.175691   4.924640   6.982852   7.992028
    22  H    8.502513   9.211397   7.172774   7.983382   9.545829
    23  Br   9.027571  10.327512   8.795835   7.806213   9.925494
    24  O    5.005047   4.828567   2.469550   5.733624   6.066342
                   11         12         13         14         15
    11  C    0.000000
    12  O    1.242454   0.000000
    13  C    2.926753   4.169201   0.000000
    14  C    1.467542   2.371692   2.480229   0.000000
    15  C    2.520476   3.651213   1.445215   1.411465   0.000000
    16  C    2.468741   2.801451   3.756601   1.403565   2.428342
    17  C    3.803768   4.813744   2.472670   2.442336   1.412896
    18  C    3.737764   4.180018   4.224209   2.408020   2.779038
    19  H    2.638665   2.454983   4.616797   2.139595   3.399981
    20  C    4.281620   5.032656   3.738324   2.814478   2.424165
    21  H    4.676604   5.767757   2.678192   3.419717   2.160230
    22  H    5.363654   6.090492   4.610640   3.896651   3.408134
    23  Br   5.312997   5.418230   6.136194   4.172437   4.691053
    24  O    4.198036   5.440484   1.271283   3.636770   2.361031
                   16         17         18         19         20
    16  C    0.000000
    17  C    2.796948   0.000000
    18  C    1.379376   2.398376   0.000000
    19  H    1.082433   3.879268   2.157602   0.000000
    20  C    2.431655   1.377338   1.406151   3.421927   0.000000
    21  H    3.880628   1.083711   3.387040   4.962900   2.137699
    22  H    3.408456   2.139570   2.167210   4.314944   1.082218
    23  Br   2.854156   4.157318   1.912028   2.985595   2.870771
    24  O    4.788911   2.797196   4.986631   5.734813   4.174049
                   21         22         23         24
    21  H    0.000000
    22  H    2.469219   0.000000
    23  Br   5.008396   2.977645   0.000000
    24  O    2.475394   4.830803   6.862104   0.000000
 Stoichiometry    C14H7BrO2
 Framework group  C1[X(C14H7BrO2)]
 Deg. of freedom    66
 Full point group                 C1      NOp   1
 RotChk:  IX=0 Diff= 6.88D-04
 Largest Abelian subgroup         C1      NOp   1
 Largest concise Abelian subgroup C1      NOp   1
                         Standard orientation:                         
 ---------------------------------------------------------------------
 Center     Atomic      Atomic             Coordinates (Angstroms)
 Number     Number       Type             X           Y           Z
 ---------------------------------------------------------------------
      1          6           0        5.064058    0.069340    0.000045
      2          6           0        4.037811    0.991515   -0.000015
      3          6           0        2.694663    0.555921   -0.000003
      4          6           0        2.401279   -0.824745    0.000076
      5          6           0        3.464748   -1.742199    0.000136
      6          6           0        4.777040   -1.307074    0.000115
      7          1           0        6.093071    0.410070    0.000034
      8          1           0        4.246271    2.055026   -0.000072
      9          1           0        3.221180   -2.797985    0.000199
     10          1           0        5.585195   -2.029330    0.000159
     11          6           0        1.024936   -1.331290    0.000117
     12          8           0        0.765989   -2.546460    0.000163
     13          6           0        1.624124    1.533471   -0.000083
     14          6           0       -0.031818   -0.312982    0.000021
     15          6           0        0.255612    1.068906   -0.000059
     16          6           0       -1.370589   -0.734511    0.000029
     17          6           0       -0.803305    2.004303   -0.000124
     18          6           0       -2.384377    0.200856   -0.000041
     19          1           0       -1.572124   -1.798017    0.000095
     20          6           0       -2.113901    1.580749   -0.000116
     21          1           0       -0.574009    3.063479   -0.000181
     22          1           0       -2.922309    2.300244   -0.000166
     23         35           0       -4.203588   -0.387635   -0.000035
     24          8           0        1.884837    2.777734   -0.000090
 ---------------------------------------------------------------------
 Rotational constants (GHZ):      1.0042135      0.1782331      0.1513676
 Leave Link  202 at Sat Jan 11 23:01:43 2020, MaxMem=   183500800 cpu:         0.0
 (Enter E:\Gaussian\G09W\l301.exe)
 Standard basis: 6-311G(d) (5D, 7F)
 Ernie: Thresh=  0.10000D-02 Tol=  0.10000D-05 Strict=F.
 There are   372 symmetry adapted cartesian basis functions of A   symmetry.
 There are   353 symmetry adapted basis functions of A   symmetry.
   353 basis functions,   637 primitive gaussians,   372 cartesian basis functions
    71 alpha electrons       71 beta electrons
       nuclear repulsion energy      1374.5400676931 Hartrees.
 IExCor=  402 DFT=T Ex+Corr=B3LYP ExCW=0 ScaHFX=  0.200000
 ScaDFX=  0.800000  0.720000  1.000000  0.810000 ScalE2=  1.000000  1.000000
 IRadAn=      0 IRanWt=     -1 IRanGd=            0 ICorTp=0 IEmpDi=141
 NAtoms=   24 NActive=   24 NUniq=   24 SFac= 1.00D+00 NAtFMM=   60 NAOKFM=F Big=F
 Integral buffers will be    262144 words long.
 Regular integral format.
 Two-electron integral symmetry is turned on.
 R6Disp:  Grimme-D3(BJ) Dispersion energy=       -0.0620565005 Hartrees.
 Nuclear repulsion after empirical dispersion term =     1374.4780111927 Hartrees.
 ------------------------------------------------------------------------------
 Polarizable Continuum Model (PCM)
 =================================
 Model                : PCM (using non-symmetric T matrix).
 Atomic radii         : UFF (Universal Force Field).
 Polarization charges : Total charges.
 Charge compensation  : None.
 Solution method      : On-the-fly selection.
 Cavity type          : Scaled VdW (van der Waals Surface) (Alpha=1.100).
 Cavity algorithm     : GePol (No added spheres)
                        Default sphere list used, NSphG=   24.
                        Lebedev-Laikov grids with approx.  5.0 points / Ang**2.
                        Smoothing algorithm: Karplus/York (Gamma=1.0000).
                        Polarization charges: spherical gaussians, with
                                              point-specific exponents (IZeta= 3).
                        Self-potential: point-specific (ISelfS= 7).
                        Self-field    : sphere-specific E.n sum rule (ISelfD= 2).
 1st derivatives      : Analytical E(r).r(x)/FMM algorithm (CHGder, D1EAlg=3).
                        Cavity 1st derivative terms included.
 Solvent              : Acetonitrile, Eps=  35.688000 Eps(inf)=   1.806874
 ------------------------------------------------------------------------------
 GePol: Number of generator spheres                  =      24
 GePol: Total number of spheres                      =      24
 GePol: Number of exposed spheres                    =      24 (100.00%)
 GePol: Number of points                             =    2166
 GePol: Average weight of points                     =       0.13
 GePol: Minimum weight of points                     =   0.48D-10
 GePol: Maximum weight of points                     =    0.20577
 GePol: Number of points with low weight             =     119
 GePol: Fraction of low-weight points (<1% of avg)   =       5.49%
 GePol: Cavity surface area                          =    279.180 Ang**2
 GePol: Cavity volume                                =    305.081 Ang**3
 Leave Link  301 at Sat Jan 11 23:01:44 2020, MaxMem=   183500800 cpu:         0.0
 (Enter E:\Gaussian\G09W\l302.exe)
 NPDir=0 NMtPBC=     1 NCelOv=     1 NCel=       1 NClECP=     1 NCelD=      1
         NCelK=      1 NCelE2=     1 NClLst=     1 CellRange=     0.0.
 One-electron integrals computed using PRISM.
 NBasis=   353 RedAO= T EigKep=  9.42D-05  NBF=   353
 NBsUse=   353 1.00D-06 EigRej= -1.00D+00 NBFU=   353
 Precomputing XC quadrature grid using
 IXCGrd= 4 IRadAn=           0 IRanWt=          -1 IRanGd=           0 AccXCQ= 0.00D+00.
 Generated NRdTot=       0 NPtTot=           0 NUsed=           0 NTot=          16
 NSgBfM=   363   363   363   363   363 MxSgAt=    24 MxSgA2=    24.
 Leave Link  302 at Sat Jan 11 23:01:46 2020, MaxMem=   183500800 cpu:         2.0
 (Enter E:\Gaussian\G09W\l308.exe)
 Leave Link  308 at Sat Jan 11 23:01:47 2020, MaxMem=   183500800 cpu:         1.0
 (Enter E:\Gaussian\G09W\l303.exe)
 DipDrv:  MaxL=1.
 Leave Link  303 at Sat Jan 11 23:01:47 2020, MaxMem=   183500800 cpu:         0.0
 (Enter E:\Gaussian\G09W\l401.exe)
 Initial guess from the checkpoint file:  "E:\Gaussian file\2-BrAQ excited singlet opt.chk"
 B after Tr=     0.000000    0.000000    0.000000
         Rot=    1.000000   -0.000004   -0.000005    0.000118 Ang=  -0.01 deg.
 Guess basis will be translated and rotated to current coordinates.
 JPrj=2 DoOrth=T DoCkMO=T.
 Generating alternative initial guess.
 ExpMin= 1.03D-01 ExpMax= 4.40D+05 ExpMxC= 1.51D+04 IAcc=2 IRadAn=         4 AccDes= 0.00D+00
 Harris functional with IExCor=  402 and IRadAn=       4 diagonalized for initial guess.
 HarFok:  IExCor=  402 AccDes= 0.00D+00 IRadAn=         4 IDoV= 1 UseB2=F ITyADJ=14
 ICtDFT=  3500011 ScaDFX=  1.000000  1.000000  1.000000  1.000000
 FoFCou: FMM=F IPFlag=           0 FMFlag=      100000 FMFlg1=           0
         NFxFlg=           0 DoJE=T BraDBF=F KetDBF=T FulRan=T
         wScrn=  0.000000 ICntrl=     500 IOpCl=  0 I1Cent=   200000004 NGrid=           0
         NMat0=    1 NMatS0=      1 NMatT0=    0 NMatD0=    1 NMtDS0=    0 NMtDT0=    0
 Petite list used in FoFCou.
 Harris En= -3262.60144877580    
 Leave Link  401 at Sat Jan 11 23:02:05 2020, MaxMem=   183500800 cpu:        18.0
 (Enter E:\Gaussian\G09W\l502.exe)
 Closed shell SCF:
 Using DIIS extrapolation, IDIIS=  1040.
 Integral symmetry usage will be decided dynamically.
 IVT=      438130 IEndB=      438130 NGot=   183500800 MDV=   183218067
 LenX=   183218067 LenY=   183079242
 Requested convergence on RMS density matrix=1.00D-08 within 128 cycles.
 Requested convergence on MAX density matrix=1.00D-06.
 Requested convergence on             energy=1.00D-06.
 No special actions if energy rises.
 Fock matrices will be formed incrementally for  20 cycles.

 Cycle   1  Pass 1  IDiag  1:
 FoFJK:  IHMeth= 1 ICntrl=       0 DoSepK=F KAlg= 0 I1Cent=   0 FoldK=F
 IRaf= 780000000 NMat=   1 IRICut=       1 DoRegI=T DoRafI=F ISym2E= 0.
 FoFCou: FMM=F IPFlag=           0 FMFlag=      100000 FMFlg1=           0
         NFxFlg=           0 DoJE=F BraDBF=F KetDBF=F FulRan=T
         wScrn=  0.000000 ICntrl=       0 IOpCl=  0 I1Cent=           0 NGrid=           0
         NMat0=    1 NMatS0=      1 NMatT0=    0 NMatD0=    1 NMtDS0=    0 NMtDT0=    0
 Symmetry not used in FoFCou.
 Inv3:  Mode=1 IEnd=    14074668.
 Iteration    1 A*A^-1 deviation from unit magnitude is 2.66D-15 for   1122.
 Iteration    1 A*A^-1 deviation from orthogonality  is 2.63D-15 for   1123    797.
 Iteration    1 A^-1*A deviation from unit magnitude is 2.00D-15 for     58.
 Iteration    1 A^-1*A deviation from orthogonality  is 6.60D-14 for   1503   1118.
 E= -3262.53745118888    
 DIIS: error= 2.24D-04 at cycle   1 NSaved=   1.
 NSaved= 1 IEnMin= 1 EnMin= -3262.53745118888     IErMin= 1 ErrMin= 2.24D-04
 ErrMax= 2.24D-04  0.00D+00 EMaxC= 1.00D-01 BMatC= 2.12D-05 BMatP= 2.12D-05
 IDIUse=3 WtCom= 9.98D-01 WtEn= 2.24D-03
 Coeff-Com:  0.100D+01
 Coeff-En:   0.100D+01
 Coeff:      0.100D+01
 Gap=     0.813 Goal=   None    Shift=    0.000
 RMSDP=4.24D-05 MaxDP=1.41D-03              OVMax= 8.42D-04

 Cycle   2  Pass 1  IDiag  1:
 RMSU=  4.21D-05    CP:  1.00D+00
 E= -3262.53746885944     Delta-E=       -0.000017670565 Rises=F Damp=F
 DIIS: error= 1.68D-04 at cycle   2 NSaved=   2.
 NSaved= 2 IEnMin= 2 EnMin= -3262.53746885944     IErMin= 2 ErrMin= 1.68D-04
 ErrMax= 1.68D-04  0.00D+00 EMaxC= 1.00D-01 BMatC= 4.56D-06 BMatP= 2.12D-05
 IDIUse=3 WtCom= 9.98D-01 WtEn= 1.68D-03
 Coeff-Com:  0.241D+00 0.759D+00
 Coeff-En:   0.000D+00 0.100D+01
 Coeff:      0.241D+00 0.759D+00
 Gap=     0.138 Goal=   None    Shift=    0.000
 RMSDP=2.00D-05 MaxDP=7.44D-04 DE=-1.77D-05 OVMax= 1.26D-03

 Cycle   3  Pass 1  IDiag  1:
 RMSU=  1.99D-05    CP:  1.00D+00  9.89D-01
 E= -3262.53746789923     Delta-E=        0.000000960213 Rises=F Damp=F
 DIIS: error= 2.51D-04 at cycle   3 NSaved=   3.
 NSaved= 3 IEnMin= 2 EnMin= -3262.53746885944     IErMin= 2 ErrMin= 1.68D-04
 ErrMax= 2.51D-04  0.00D+00 EMaxC= 1.00D-01 BMatC= 6.24D-06 BMatP= 4.56D-06
 IDIUse=3 WtCom= 3.87D-01 WtEn= 6.13D-01
 Coeff-Com:  0.298D-01 0.535D+00 0.436D+00
 Coeff-En:   0.000D+00 0.545D+00 0.455D+00
 Coeff:      0.115D-01 0.541D+00 0.448D+00
 Gap=     0.138 Goal=   None    Shift=    0.000
 RMSDP=1.32D-05 MaxDP=4.51D-04 DE= 9.60D-07 OVMax= 7.85D-04

 Cycle   4  Pass 1  IDiag  1:
 RMSU=  6.43D-06    CP:  1.00D+00  1.08D+00  4.54D-01
 E= -3262.53747248492     Delta-E=       -0.000004585692 Rises=F Damp=F
 DIIS: error= 5.26D-05 at cycle   4 NSaved=   4.
 NSaved= 4 IEnMin= 4 EnMin= -3262.53747248492     IErMin= 4 ErrMin= 5.26D-05
 ErrMax= 5.26D-05  0.00D+00 EMaxC= 1.00D-01 BMatC= 4.63D-07 BMatP= 4.56D-06
 IDIUse=1 WtCom= 1.00D+00 WtEn= 0.00D+00
 Coeff-Com: -0.798D-02 0.249D+00 0.274D+00 0.485D+00
 Coeff:     -0.798D-02 0.249D+00 0.274D+00 0.485D+00
 Gap=     0.138 Goal=   None    Shift=    0.000
 RMSDP=3.41D-06 MaxDP=1.40D-04 DE=-4.59D-06 OVMax= 1.45D-04

 Cycle   5  Pass 1  IDiag  1:
 RMSU=  9.28D-07    CP:  1.00D+00  1.05D+00  4.69D-01  5.48D-01
 E= -3262.53747283813     Delta-E=       -0.000000353206 Rises=F Damp=F
 DIIS: error= 9.74D-06 at cycle   5 NSaved=   5.
 NSaved= 5 IEnMin= 5 EnMin= -3262.53747283813     IErMin= 5 ErrMin= 9.74D-06
 ErrMax= 9.74D-06  0.00D+00 EMaxC= 1.00D-01 BMatC= 1.85D-08 BMatP= 4.63D-07
 IDIUse=1 WtCom= 1.00D+00 WtEn= 0.00D+00
 Coeff-Com: -0.545D-02 0.107D+00 0.130D+00 0.261D+00 0.507D+00
 Coeff:     -0.545D-02 0.107D+00 0.130D+00 0.261D+00 0.507D+00
 Gap=     0.138 Goal=   None    Shift=    0.000
 RMSDP=7.00D-07 MaxDP=2.04D-05 DE=-3.53D-07 OVMax= 5.28D-05

 Cycle   6  Pass 1  IDiag  1:
 RMSU=  3.71D-07    CP:  1.00D+00  1.05D+00  4.83D-01  6.05D-01  7.42D-01
 E= -3262.53747285222     Delta-E=       -0.000000014097 Rises=F Damp=F
 DIIS: error= 4.33D-06 at cycle   6 NSaved=   6.
 NSaved= 6 IEnMin= 6 EnMin= -3262.53747285222     IErMin= 6 ErrMin= 4.33D-06
 ErrMax= 4.33D-06  0.00D+00 EMaxC= 1.00D-01 BMatC= 2.57D-09 BMatP= 1.85D-08
 IDIUse=1 WtCom= 1.00D+00 WtEn= 0.00D+00
 Coeff-Com: -0.175D-02 0.232D-01 0.336D-01 0.721D-01 0.293D+00 0.580D+00
 Coeff:     -0.175D-02 0.232D-01 0.336D-01 0.721D-01 0.293D+00 0.580D+00
 Gap=     0.138 Goal=   None    Shift=    0.000
 RMSDP=2.73D-07 MaxDP=1.17D-05 DE=-1.41D-08 OVMax= 1.87D-05

 Cycle   7  Pass 1  IDiag  1:
 RMSU=  1.29D-07    CP:  1.00D+00  1.05D+00  4.80D-01  5.84D-01  7.71D-01
                    CP:  5.70D-01
 E= -3262.53747285417     Delta-E=       -0.000000001945 Rises=F Damp=F
 DIIS: error= 1.66D-06 at cycle   7 NSaved=   7.
 NSaved= 7 IEnMin= 7 EnMin= -3262.53747285417     IErMin= 7 ErrMin= 1.66D-06
 ErrMax= 1.66D-06  0.00D+00 EMaxC= 1.00D-01 BMatC= 4.54D-10 BMatP= 2.57D-09
 IDIUse=1 WtCom= 1.00D+00 WtEn= 0.00D+00
 Coeff-Com: -0.717D-03 0.560D-02 0.105D-01 0.248D-01 0.142D+00 0.363D+00
 Coeff-Com:  0.455D+00
 Coeff:     -0.717D-03 0.560D-02 0.105D-01 0.248D-01 0.142D+00 0.363D+00
 Coeff:      0.455D+00
 Gap=     0.138 Goal=   None    Shift=    0.000
 RMSDP=1.11D-07 MaxDP=4.36D-06 DE=-1.95D-09 OVMax= 6.25D-06

 Cycle   8  Pass 1  IDiag  1:
 RMSU=  3.60D-08    CP:  1.00D+00  1.05D+00  4.82D-01  5.92D-01  7.81D-01
                    CP:  6.94D-01  6.22D-01
 E= -3262.53747285452     Delta-E=       -0.000000000347 Rises=F Damp=F
 DIIS: error= 5.18D-07 at cycle   8 NSaved=   8.
 NSaved= 8 IEnMin= 8 EnMin= -3262.53747285452     IErMin= 8 ErrMin= 5.18D-07
 ErrMax= 5.18D-07  0.00D+00 EMaxC= 1.00D-01 BMatC= 4.14D-11 BMatP= 4.54D-10
 IDIUse=1 WtCom= 1.00D+00 WtEn= 0.00D+00
 Coeff-Com: -0.111D-03-0.635D-03 0.333D-03 0.245D-02 0.411D-01 0.127D+00
 Coeff-Com:  0.256D+00 0.574D+00
 Coeff:     -0.111D-03-0.635D-03 0.333D-03 0.245D-02 0.411D-01 0.127D+00
 Coeff:      0.256D+00 0.574D+00
 Gap=     0.138 Goal=   None    Shift=    0.000
 RMSDP=3.11D-08 MaxDP=1.18D-06 DE=-3.47D-10 OVMax= 2.05D-06

 Cycle   9  Pass 1  IDiag  1:
 RMSU=  1.71D-08    CP:  1.00D+00  1.05D+00  4.82D-01  5.91D-01  7.81D-01
                    CP:  6.66D-01  7.04D-01  6.20D-01
 E= -3262.53747285451     Delta-E=        0.000000000005 Rises=F Damp=F
 DIIS: error= 2.85D-07 at cycle   9 NSaved=   9.
 NSaved= 9 IEnMin= 8 EnMin= -3262.53747285452     IErMin= 9 ErrMin= 2.85D-07
 ErrMax= 2.85D-07  0.00D+00 EMaxC= 1.00D-01 BMatC= 9.57D-12 BMatP= 4.14D-11
 IDIUse=1 WtCom= 1.00D+00 WtEn= 0.00D+00
 Coeff-Com: -0.114D-04-0.913D-03-0.845D-03-0.645D-03 0.122D-01 0.440D-01
 Coeff-Com:  0.110D+00 0.375D+00 0.462D+00
 Coeff:     -0.114D-04-0.913D-03-0.845D-03-0.645D-03 0.122D-01 0.440D-01
 Coeff:      0.110D+00 0.375D+00 0.462D+00
 Gap=     0.138 Goal=   None    Shift=    0.000
 RMSDP=8.34D-09 MaxDP=2.64D-07 DE= 4.55D-12 OVMax= 8.82D-07

 Error on total polarization charges =  0.01380
 SCF Done:  E(RB3LYP) =  -3262.53747285     A.U. after    9 cycles
            NFock=  9  Conv=0.83D-08     -V/T= 2.0018
 KE= 3.256758302203D+03 PE=-1.050523270741D+04 EE= 2.611458921155D+03
 Leave Link  502 at Sat Jan 11 23:11:04 2020, MaxMem=   183500800 cpu:       539.0
 (Enter E:\Gaussian\G09W\l801.exe)
 DoSCS=F DFT=T ScalE2(SS,OS)=  1.000000  1.000000
 ExpMin= 1.03D-01 ExpMax= 4.40D+05 ExpMxC= 1.51D+04 IAcc=3 IRadAn=         5 AccDes= 0.00D+00
 HarFok:  IExCor=  205 AccDes= 0.00D+00 IRadAn=         5 IDoV=-2 UseB2=F ITyADJ=14
 ICtDFT= 12500011 ScaDFX=  1.000000  1.000000  1.000000  1.000000
 Largest valence mixing into a core orbital is  2.27D-04
 Largest core mixing into a valence orbital is  2.00D-05
 Range of M.O.s used for correlation:    31   353
 NBasis=   353 NAE=    71 NBE=    71 NFC=    30 NFV=     0
 NROrb=    323 NOA=    41 NOB=    41 NVA=   282 NVB=   282

 **** Warning!!: The largest alpha MO coefficient is  0.24765645D+02

 Leave Link  801 at Sat Jan 11 23:11:06 2020, MaxMem=   183500800 cpu:         1.0
 (Enter E:\Gaussian\G09W\l914.exe)
 RHF ground state
 MDV=   183500800 DFT=T DoStab=F Mixed=T DoRPA=T DoScal=F NonHer=T
 NEqPCM:  Using equilibrium solvation (IEInf=0, Eps=  35.6880, EpsInf=   1.8069)
 Making orbital integer symmetry assigments:
 Orbital symmetries:
       Occupied  (A) (A) (A) (A) (A) (A) (A) (A) (A) (A) (A) (A)
                 (A) (A) (A) (A) (A) (A) (A) (A) (A) (A) (A) (A)
                 (A) (A) (A) (A) (A) (A) (A) (A) (A) (A) (A) (A)
                 (A) (A) (A) (A) (A) (A) (A) (A) (A) (A) (A) (A)
                 (A) (A) (A) (A) (A) (A) (A) (A) (A) (A) (A) (A)
                 (A) (A) (A) (A) (A) (A) (A) (A) (A) (A) (A)
       Virtual   (A) (A) (A) (A) (A) (A) (A) (A) (A) (A) (A) (A)
                 (A) (A) (A) (A) (A) (A) (A) (A) (A) (A) (A) (A)
                 (A) (A) (A) (A) (A) (A) (A) (A) (A) (A) (A) (A)
                 (A) (A) (A) (A) (A) (A) (A) (A) (A) (A) (A) (A)
                 (A) (A) (A) (A) (A) (A) (A) (A) (A) (A) (A) (A)
                 (A) (A) (A) (A) (A) (A) (A) (A) (A) (A) (A) (A)
                 (A) (A) (A) (A) (A) (A) (A) (A) (A) (A) (A) (A)
                 (A) (A) (A) (A) (A) (A) (A) (A) (A) (A) (A) (A)
                 (A) (A) (A) (A) (A) (A) (A) (A) (A) (A) (A) (A)
                 (A) (A) (A) (A) (A) (A) (A) (A) (A) (A) (A) (A)
                 (A) (A) (A) (A) (A) (A) (A) (A) (A) (A) (A) (A)
                 (A) (A) (A) (A) (A) (A) (A) (A) (A) (A) (A) (A)
                 (A) (A) (A) (A) (A) (A) (A) (A) (A) (A) (A) (A)
                 (A) (A) (A) (A) (A) (A) (A) (A) (A) (A) (A) (A)
                 (A) (A) (A) (A) (A) (A) (A) (A) (A) (A) (A) (A)
                 (A) (A) (A) (A) (A) (A) (A) (A) (A) (A) (A) (A)
                 (A) (A) (A) (A) (A) (A) (A) (A) (A) (A) (A) (A)
                 (A) (A) (A) (A) (A) (A) (A) (A) (A) (A) (A) (A)
                 (A) (A) (A) (A) (A) (A) (A) (A) (A) (A) (A) (A)
                 (A) (A) (A) (A) (A) (A) (A) (A) (A) (A) (A) (A)
                 (A) (A) (A) (A) (A) (A) (A) (A) (A) (A) (A) (A)
                 (A) (A) (A) (A) (A) (A) (A) (A) (A) (A) (A) (A)
                 (A) (A) (A) (A) (A) (A) (A) (A) (A) (A) (A) (A)
                 (A) (A) (A) (A) (A) (A)
 Generating guess from densities on rwf.
 Convergence on wavefunction:    0.000001000000000
 Davidson Disk Diagonalization:  ConvIn= 1.00D-06 SkipCon=T Conv= 1.00D-06.
 Max sub-space:   200 roots to seek:     5 dimension of matrix:        23124
 Iteration     1 Dimension    10 NMult     0 NNew     10
 CISAX will form    10 AO SS matrices at one time.
 NMat=    10 NSing=    10 JSym2X= 0.
 FoFJK:  IHMeth= 1 ICntrl=       0 DoSepK=F KAlg= 0 I1Cent=   0 FoldK=F
 IRaf=         0 NMat=  20 IRICut=       1 DoRegI=T DoRafI=F ISym2E= 0.
 FoFCou: FMM=F IPFlag=           0 FMFlag=      100000 FMFlg1=           0
         NFxFlg=           0 DoJE=F BraDBF=F KetDBF=F FulRan=T
         wScrn=  0.000000 ICntrl=       0 IOpCl=  0 I1Cent=           0 NGrid=           0
         NMat0=   20 NMatS0=     10 NMatT0=    0 NMatD0=   20 NMtDS0=    0 NMtDT0=    0
 Symmetry not used in FoFCou.
 Excitation Energies [eV] at current iteration:
 Root      1 :     2.768918272582602
 Root      2 :     3.040097872515475
 Root      3 :     3.107378318896916
 Root      4 :     3.474882177809662
 Root      5 :     3.559993552631521
 Iteration     2 Dimension    20 NMult    10 NNew     10
 CISAX will form    10 AO SS matrices at one time.
 NMat=    10 NSing=    10 JSym2X= 0.
 Root      1 not converged, maximum delta is    0.000597316853603
 Root      2 not converged, maximum delta is    0.001815371356441
 Root      3 not converged, maximum delta is    0.000943990644893
 Root      4 not converged, maximum delta is    0.000539547415553
 Root      5 not converged, maximum delta is    0.002048815806304
 Excitation Energies [eV] at current iteration:
 Root      1 :     2.768873719587193   Change is   -0.000044552995409
 Root      2 :     3.039989934036576   Change is   -0.000107938478899
 Root      3 :     3.107364966927323   Change is   -0.000013351969593
 Root      4 :     3.474868120755680   Change is   -0.000014057053982
 Root      5 :     3.559966573547906   Change is   -0.000026979083614
 Iteration     3 Dimension    30 NMult    20 NNew     10
 CISAX will form    10 AO SS matrices at one time.
 NMat=    10 NSing=    10 JSym2X= 0.
 Root      1 not converged, maximum delta is    0.000146341161668
 Root      2 not converged, maximum delta is    0.000314903619018
 Root      3 not converged, maximum delta is    0.000322171196930
 Root      4 not converged, maximum delta is    0.000292660495395
 Root      5 not converged, maximum delta is    0.001626291950162
 Excitation Energies [eV] at current iteration:
 Root      1 :     2.768873151981637   Change is   -0.000000567605555
 Root      2 :     3.039987627416900   Change is   -0.000002306619676
 Root      3 :     3.107363589474651   Change is   -0.000001377452671
 Root      4 :     3.474865446985725   Change is   -0.000002673769955
 Root      5 :     3.559953639727300   Change is   -0.000012933820606
 Iteration     4 Dimension    40 NMult    30 NNew     10
 CISAX will form    10 AO SS matrices at one time.
 NMat=    10 NSing=    10 JSym2X= 0.
 Root      1 not converged, maximum delta is    0.000015718008743
 Root      2 not converged, maximum delta is    0.000043635736923
 Root      3 not converged, maximum delta is    0.000038776185872
 Root      4 not converged, maximum delta is    0.000115178185228
 Root      5 not converged, maximum delta is    0.000560007204909
 Excitation Energies [eV] at current iteration:
 Root      1 :     2.768873139034861   Change is   -0.000000012946776
 Root      2 :     3.039987576994259   Change is   -0.000000050422641
 Root      3 :     3.107363447880569   Change is   -0.000000141594083
 Root      4 :     3.474865095077790   Change is   -0.000000351907935
 Root      5 :     3.559951344420789   Change is   -0.000002295306511
 Iteration     5 Dimension    50 NMult    40 NNew     10
 CISAX will form    10 AO SS matrices at one time.
 NMat=    10 NSing=    10 JSym2X= 0.
 Root      1 not converged, maximum delta is    0.000001441237891
 Root      2 not converged, maximum delta is    0.000005390272743
 Root      3 not converged, maximum delta is    0.000009666385134
 Root      4 not converged, maximum delta is    0.000036826825605
 Root      5 not converged, maximum delta is    0.000129013740418
 Excitation Energies [eV] at current iteration:
 Root      1 :     2.768873138460985   Change is   -0.000000000573876
 Root      2 :     3.039987573955949   Change is   -0.000000003038310
 Root      3 :     3.107363435642395   Change is   -0.000000012238174
 Root      4 :     3.474865037414612   Change is   -0.000000057663178
 Root      5 :     3.559951007862004   Change is   -0.000000336558785
 Iteration     6 Dimension    60 NMult    50 NNew     10
 CISAX will form    10 AO SS matrices at one time.
 NMat=    10 NSing=    10 JSym2X= 0.
 Root      1 has converged.
 Root      2 not converged, maximum delta is    0.000001086230643
 Root      3 not converged, maximum delta is    0.000001729037468
 Root      4 not converged, maximum delta is    0.000005385740627
 Root      5 not converged, maximum delta is    0.000012189318092
 Excitation Energies [eV] at current iteration:
 Root      1 :     2.768873138396351   Change is   -0.000000000064635
 Root      2 :     3.039987573542476   Change is   -0.000000000413473
 Root      3 :     3.107363434712186   Change is   -0.000000000930209
 Root      4 :     3.474865031916999   Change is   -0.000000005497613
 Root      5 :     3.559950975602364   Change is   -0.000000032259640
 Iteration     7 Dimension    68 NMult    60 NNew      8
 CISAX will form     8 AO SS matrices at one time.
 NMat=     8 NSing=     8 JSym2X= 0.
 Root      1 has converged.
 Root      2 has converged.
 Root      3 has converged.
 Root      4 not converged, maximum delta is    0.000001251417449
 Root      5 not converged, maximum delta is    0.000003019162198
 Excitation Energies [eV] at current iteration:
 Root      1 :     2.768873138395489   Change is   -0.000000000000861
 Root      2 :     3.039987573523222   Change is   -0.000000000019254
 Root      3 :     3.107363434646443   Change is   -0.000000000065743
 Root      4 :     3.474865031447582   Change is   -0.000000000469417
 Root      5 :     3.559950972484485   Change is   -0.000000003117878
 Iteration     8 Dimension    72 NMult    68 NNew      4
 CISAX will form     4 AO SS matrices at one time.
 NMat=     4 NSing=     4 JSym2X= 0.
 Root      1 has converged.
 Root      2 has converged.
 Root      3 has converged.
 Root      4 has converged.
 Root      5 has converged.
 Excitation Energies [eV] at current iteration:
 Root      1 :     2.768873138395430   Change is   -0.000000000000060
 Root      2 :     3.039987573522843   Change is   -0.000000000000379
 Root      3 :     3.107363434643797   Change is   -0.000000000002646
 Root      4 :     3.474865031420163   Change is   -0.000000000027419
 Root      5 :     3.559950972279356   Change is   -0.000000000205128
 Convergence achieved on expansion vectors.
 ***********************************************************************
 Excited states from <AA,BB:AA,BB> singles matrix:
 ***********************************************************************
 
 1PDM for each excited state written to RWF  633
 Ground to excited state transition densities written to RWF  633
 Ground to excited state transition electric dipole moments (Au):
       state          X           Y           Z        Dip. S.      Osc.
         1         0.0001      0.0000      0.0021      0.0000      0.0000
         2         0.0001      0.0000     -0.0011      0.0000      0.0000
         3         1.0075      0.1602      0.0000      1.0408      0.0792
         4         1.3142     -0.3151      0.0000      1.8263      0.1555
         5         1.1518      0.4229      0.0000      1.5053      0.1313
 Ground to excited state transition velocity dipole moments (Au):
       state          X           Y           Z        Dip. S.      Osc.
         1         0.0000      0.0000     -0.0003      0.0000      0.0000
         2         0.0000      0.0000      0.0003      0.0000      0.0000
         3        -0.1139     -0.0170      0.0000      0.0133      0.0774
         4        -0.1710      0.0404      0.0000      0.0309      0.1611
         5        -0.1505     -0.0514      0.0000      0.0253      0.1289
 Ground to excited state transition magnetic dipole moments (Au):
       state          X           Y           Z
         1        -0.1652     -0.7604      0.0001
         2         0.0546      0.2620      0.0000
         3         0.0000      0.0001      1.2164
         4         0.0000      0.0000     -0.0209
         5         0.0000     -0.0001     -0.8094
 Ground to excited state transition velocity quadrupole moments (Au):
       state          XX          YY          ZZ          XY          XZ          YZ
         1         0.0000      0.0000      0.0000      0.0000      0.0181     -0.0043
         2         0.0000      0.0000      0.0000      0.0000     -0.0083      0.0015
         3         0.2749     -0.2169      0.0131      0.2490      0.0000      0.0000
         4        -1.5507      0.2108     -0.0181      0.2229      0.0000      0.0000
         5         0.2125     -0.1482      0.0240     -0.4511      0.0000      0.0000
 <0|del|b> * <b|rxdel|0> + <0|del|b> * <b|delr+rdel|0>
 Rotatory Strengths (R) in cgs (10**-40 erg-esu-cm/Gauss)
       state          XX          YY          ZZ    R(velocity)    E-M Angle
         1        -0.0005      0.0057      0.0051      0.0034       90.00
         2         0.0004     -0.0015     -0.0010     -0.0007       90.00
         3        -0.0109     -0.0083     -0.0024     -0.0072       90.00
         4         0.0004      0.0058     -0.0085     -0.0008       90.00
         5         0.0120     -0.0022      0.0045      0.0048       90.00
 1/2[<0|r|b>*<b|rxdel|0> + (<0|rxdel|b>*<b|r|0>)*]
 Rotatory Strengths (R) in cgs (10**-40 erg-esu-cm/Gauss)
       state          XX          YY          ZZ     R(length)
         1         0.0113     -0.0003     -0.0002      0.0036
         2        -0.0028      0.0009      0.0000     -0.0007
         3        -0.0021     -0.0162     -0.0031     -0.0071
         4        -0.0015     -0.0012      0.0004     -0.0008
         5        -0.0028      0.0189     -0.0030      0.0044
  1/2[<0|del|b>*<b|r|0> + (<0|r|b>*<b|del|0>)*] (Au)
       state          X           Y           Z        Dip. S.   Osc.(frdel)
         1         0.0000      0.0000      0.0000      0.0000      0.0000
         2         0.0000      0.0000      0.0000      0.0000      0.0000
         3        -0.1147     -0.0027      0.0000      0.1174      0.0783
         4        -0.2247     -0.0127      0.0000      0.2374      0.1583
         5        -0.1734     -0.0217      0.0000      0.1951      0.1301

 Excitation energies and oscillator strengths:
 
 Excited State   1:      Singlet-A      2.7689 eV  447.78 nm  f=0.0000  <S**2>=0.000
      70 -> 72         0.69333
 This state for optimization and/or second-order correction.
 Total Energy, E(TD-HF/TD-KS) =  -3262.43571863    
 Copying the excited state density for this state as the 1-particle RhoCI density.
 
 Excited State   2:      Singlet-A      3.0400 eV  407.84 nm  f=0.0000  <S**2>=0.000
      67 -> 72         0.68755
      70 -> 73         0.11316
 
 Excited State   3:      Singlet-A      3.1074 eV  399.00 nm  f=0.0792  <S**2>=0.000
      68 -> 72        -0.12454
      69 -> 72         0.16473
      71 -> 72         0.67187
 
 Excited State   4:      Singlet-A      3.4749 eV  356.80 nm  f=0.1555  <S**2>=0.000
      68 -> 72         0.36038
      69 -> 72         0.58606
 
 Excited State   5:      Singlet-A      3.5600 eV  348.27 nm  f=0.1313  <S**2>=0.000
      66 -> 72         0.26778
      68 -> 72         0.52069
      69 -> 72        -0.33714
      71 -> 72         0.16637
 SavETr:  write IOETrn=   770 NScale= 10 NData=  16 NLR=1 NState=    5 LETran=      96.
 The selected state is a singlet
 CISAX will form     1 AO SS matrices at one time.
 NMat=     1 NSing=     1 JSym2X= 0.
 GePol: Maximum number of non-zero 1st derivatives   =     351
 CISAX will form     1 AO SS matrices at one time.
 NMat=     1 NSing=     1 JSym2X= 0.
 Leave Link  914 at Sat Jan 11 23:48:43 2020, MaxMem=   183500800 cpu:      2256.0
 (Enter E:\Gaussian\G09W\l1002.exe)
 Minotr:  Closed shell wavefunction.
          Computing CIS/TD-HF/TD-KS derivatives.
          Using Z-Vector for PSCF gradient.
          Skipping F1 and S1 gradient terms here.
          IDoAtm=111111111111111111111111
 NEqPCM:  Using equilibrium solvation (IEInf=0, Eps=  35.6880, EpsInf=   1.8069)
          Frozen-core window.
          Direct CPHF calculation.
          Differentiating once with respect to electric field.
                with respect to dipole field.
          Differentiating once with respect to nuclear coordinates.
          Requested convergence is 1.0D-10 RMS, and 1.0D-09 maximum.
          NewPWx=F KeepS1=T KeepF1=T KeepIn=T MapXYZ=F SortEE=F KeepMc=T.
          MDV=     183500466 using IRadAn=       0.
 Using stored XC quadrature information.
          Solving linear equations separately, MaxMat=       0.
          There are     1 degrees of freedom in the 1st order CPHF.  IDoFFX=0 NUNeed=     1.
 FoFJK:  IHMeth= 1 ICntrl=       0 DoSepK=F KAlg= 0 I1Cent=   0 FoldK=F
 IRaf= 800000000 NMat=   1 IRICut=       1 DoRegI=T DoRafI=F ISym2E=-1.
 FoFCou: FMM=F IPFlag=           0 FMFlag=      100000 FMFlg1=           0
         NFxFlg=           0 DoJE=F BraDBF=F KetDBF=F FulRan=T
         wScrn=  0.000000 ICntrl=       0 IOpCl=  0 I1Cent=           0 NGrid=           0
         NMat0=    1 NMatS0=      1 NMatT0=    0 NMatD0=    1 NMtDS0=    0 NMtDT0=    0
 Petite list used in FoFCou.
 LinEq1:  Iter=  0 NonCon=     1 RMS=1.04D-02 Max=5.75D-01 NDo=     1
 AX will form     1 AO Fock derivatives at one time.
 LinEq1:  Iter=  1 NonCon=     1 RMS=2.68D-03 Max=1.23D-01 NDo=     1
 LinEq1:  Iter=  2 NonCon=     1 RMS=2.51D-03 Max=8.69D-02 NDo=     1
 LinEq1:  Iter=  3 NonCon=     1 RMS=1.24D-03 Max=4.41D-02 NDo=     1
 LinEq1:  Iter=  4 NonCon=     1 RMS=8.36D-04 Max=3.54D-02 NDo=     1
 LinEq1:  Iter=  5 NonCon=     1 RMS=5.64D-04 Max=1.82D-02 NDo=     1
 LinEq1:  Iter=  6 NonCon=     1 RMS=3.54D-04 Max=1.45D-02 NDo=     1
 LinEq1:  Iter=  7 NonCon=     1 RMS=2.61D-04 Max=1.02D-02 NDo=     1
 LinEq1:  Iter=  8 NonCon=     1 RMS=1.32D-04 Max=5.09D-03 NDo=     1
 LinEq1:  Iter=  9 NonCon=     1 RMS=1.03D-04 Max=4.90D-03 NDo=     1
 LinEq1:  Iter= 10 NonCon=     1 RMS=3.30D-05 Max=8.32D-04 NDo=     1
 LinEq1:  Iter= 11 NonCon=     1 RMS=1.52D-05 Max=6.15D-04 NDo=     1
 LinEq1:  Iter= 12 NonCon=     1 RMS=8.41D-06 Max=3.05D-04 NDo=     1
 LinEq1:  Iter= 13 NonCon=     1 RMS=3.78D-06 Max=1.13D-04 NDo=     1
 LinEq1:  Iter= 14 NonCon=     1 RMS=2.09D-06 Max=6.74D-05 NDo=     1
 LinEq1:  Iter= 15 NonCon=     1 RMS=1.27D-06 Max=3.77D-05 NDo=     1
 LinEq1:  Iter= 16 NonCon=     1 RMS=3.40D-07 Max=8.14D-06 NDo=     1
 LinEq1:  Iter= 17 NonCon=     1 RMS=2.08D-07 Max=7.19D-06 NDo=     1
 LinEq1:  Iter= 18 NonCon=     1 RMS=9.99D-08 Max=2.81D-06 NDo=     1
 LinEq1:  Iter= 19 NonCon=     1 RMS=5.87D-08 Max=2.18D-06 NDo=     1
 LinEq1:  Iter= 20 NonCon=     1 RMS=3.22D-08 Max=1.02D-06 NDo=     1
 LinEq1:  Iter= 21 NonCon=     1 RMS=1.19D-08 Max=2.33D-07 NDo=     1
 LinEq1:  Iter= 22 NonCon=     1 RMS=6.19D-09 Max=1.83D-07 NDo=     1
 LinEq1:  Iter= 23 NonCon=     1 RMS=2.06D-09 Max=4.14D-08 NDo=     1
 LinEq1:  Iter= 24 NonCon=     1 RMS=1.25D-09 Max=3.94D-08 NDo=     1
 LinEq1:  Iter= 25 NonCon=     1 RMS=3.71D-10 Max=1.14D-08 NDo=     1
 LinEq1:  Iter= 26 NonCon=     1 RMS=2.09D-10 Max=8.49D-09 NDo=     1
 LinEq1:  Iter= 27 NonCon=     1 RMS=8.45D-11 Max=2.62D-09 NDo=     1
 LinEq1:  Iter= 28 NonCon=     0 RMS=2.03D-11 Max=6.88D-10 NDo=     1
 Linear equations converged to 1.000D-10 1.000D-09 after    28 iterations.
 End of Minotr F.D. properties file   721 does not exist.
 End of Minotr F.D. properties file   722 does not exist.
 End of Minotr F.D. properties file   788 does not exist.
 Leave Link 1002 at Sun Jan 12 00:21:40 2020, MaxMem=   183500800 cpu:      1977.0
 (Enter E:\Gaussian\G09W\l701.exe)
 Compute integral first derivatives.
 ... and contract with generalized density number  6.
 R6Disp: Adding Grimme-D3(BJ) dispersion energy 1st derivatives to the gradient.
 D1PCM: PCM CHGder 1st derivatives, ID1Alg=3 FixD1E=F DoIter=F DoCFld=F I1PDM=6.
 Leave Link  701 at Sun Jan 12 00:22:29 2020, MaxMem=   183500800 cpu:        48.0
 (Enter E:\Gaussian\G09W\l702.exe)
 L702 exits ... SP integral derivatives will be done elsewhere.
 Leave Link  702 at Sun Jan 12 00:22:30 2020, MaxMem=   183500800 cpu:         0.0
 (Enter E:\Gaussian\G09W\l703.exe)
 Compute integral first derivatives, UseDBF=F ICtDFT=           0.
 Integral derivatives from FoFJK, PRISM(SPDF).
 Calling FoFJK, ICntrl=  10005127 FMM=F ISym2X=0 I1Cent= 0 IOpClX= 0 NMat=1 NMatS=1 NMatT=0.
 FoFJK:  IHMeth= 1 ICntrl=10005127 DoSepK=F KAlg= 0 I1Cent=   0 FoldK=F
 IRaf=         0 NMat=   1 IRICut=       1 DoRegI=T DoRafI=F ISym2E= 0.
 FoFCou: FMM=F IPFlag=           0 FMFlag=      100000 FMFlg1=         800
         NFxFlg=           0 DoJE=F BraDBF=F KetDBF=F FulRan=T
         wScrn=  0.000000 ICntrl=10005127 IOpCl=  0 I1Cent=           0 NGrid=           0
         NMat0=    1 NMatS0=      1 NMatT0=    0 NMatD0=    1 NMtDS0=    0 NMtDT0=    0
 Symmetry not used in FoFCou.
 Leave Link  703 at Sun Jan 12 00:26:03 2020, MaxMem=   183500800 cpu:       213.0
 (Enter E:\Gaussian\G09W\l716.exe)
 Dipole        = 1.17496846D+00 1.19994977D+00-7.15597937D-05
 ***** Axes restored to original set *****
 -------------------------------------------------------------------
 Center     Atomic                   Forces (Hartrees/Bohr)
 Number     Number              X              Y              Z
 -------------------------------------------------------------------
      1        6          -0.000041290    0.000005690    0.000000392
      2        6          -0.000214808   -0.000003980   -0.000000814
      3        6           0.000165210    0.000298057    0.000002234
      4        6          -0.000075884    0.000190753   -0.000003205
      5        6          -0.000295877   -0.000048744    0.000000963
      6        6          -0.000143717   -0.000102460   -0.000000476
      7        1          -0.000048480   -0.000047970    0.000000120
      8        1          -0.000000737    0.000001360    0.000000260
      9        1           0.000148318   -0.000002562    0.000000130
     10        1          -0.000065879    0.000009300   -0.000000183
     11        6           0.000290014   -0.001506977    0.000006694
     12        8          -0.000172890    0.000810820   -0.000002475
     13        6           0.000253955   -0.000880300   -0.000005142
     14        6           0.000047753    0.000219321   -0.000003091
     15        6          -0.000327078    0.000275277    0.000002200
     16        6           0.000167955    0.000052856    0.000000610
     17        6           0.000226833    0.000083490   -0.000000613
     18        6           0.000126588   -0.000037655    0.000000033
     19        1          -0.000083899   -0.000010367    0.000000143
     20        6          -0.000099152    0.000193113   -0.000000057
     21        1          -0.000039749    0.000012159    0.000000282
     22        1           0.000075316   -0.000054965    0.000000163
     23       35           0.000243538   -0.000023607   -0.000000116
     24        8          -0.000136039    0.000567390    0.000001949
 -------------------------------------------------------------------
 Cartesian Forces:  Max     0.001506977 RMS     0.000264714
 Leave Link  716 at Sun Jan 12 00:26:04 2020, MaxMem=   183500800 cpu:         0.0
 (Enter E:\Gaussian\G09W\l103.exe)

 GradGradGradGradGradGradGradGradGradGradGradGradGradGradGradGradGradGrad
 Berny optimization.
 Using GEDIIS/GDIIS optimizer.
 FormGI is forming the generalized inverse of G from B-inverse, IUseBI=4.
 Internal  Forces:  Max     0.000829138 RMS     0.000139425
 Search for a local minimum.
 Step number   2 out of a maximum of  142
 All quantities printed in internal units (Hartrees-Bohrs-Radians)
 RMS Force = .13943D-03 SwitMx=.10000D-02 MixMth= 2
 Mixed Optimization -- En-DIIS/RFO-DIIS
 Swapping is turned off.
 Update second derivatives using D2CorX and points    1    2
 DE= -5.18D-05 DEPred=-5.46D-05 R= 9.48D-01
 TightC=F SS=  1.41D+00  RLast= 1.75D-02 DXNew= 5.0454D-01 5.2396D-02
 Trust test= 9.48D-01 RLast= 1.75D-02 DXMaxT set to 3.00D-01
 ITU=  1  0
     Eigenvalues ---    0.01175   0.01287   0.01432   0.01618   0.01648
     Eigenvalues ---    0.01728   0.01756   0.01818   0.01841   0.02065
     Eigenvalues ---    0.02074   0.02079   0.02091   0.02140   0.02157
     Eigenvalues ---    0.02159   0.02181   0.02182   0.02206   0.02233
     Eigenvalues ---    0.02260   0.15264   0.16000   0.16000   0.16000
     Eigenvalues ---    0.16000   0.16000   0.16028   0.17779   0.21981
     Eigenvalues ---    0.22452   0.22669   0.23686   0.24346   0.24498
     Eigenvalues ---    0.24634   0.25000   0.25000   0.25000   0.25000
     Eigenvalues ---    0.25232   0.34544   0.34858   0.35459   0.35470
     Eigenvalues ---    0.35482   0.35501   0.35567   0.35645   0.35727
     Eigenvalues ---    0.37345   0.38313   0.39186   0.40863   0.41173
     Eigenvalues ---    0.41275   0.43361   0.43939   0.44232   0.46383
     Eigenvalues ---    0.47167   0.47587   0.48510   0.51872   0.76493
     Eigenvalues ---    0.80570
 En-DIIS/RFO-DIIS IScMMF=        0 using points:     2    1
 RFO step:  Lambda=-3.61316586D-06.
 NNeg= 0 NP= 2 Switch=  2.50D-03 Rises=F DC=  5.18D-05 SmlDif=  1.00D-05
 RMS Error=  0.2031941847D-03 NUsed= 2 EDIIS=F
 DidBck=F Rises=F RFO-DIIS coefs:    0.93861    0.06139
 Iteration  1 RMS(Cart)=  0.00056250 RMS(Int)=  0.00000011
 Iteration  2 RMS(Cart)=  0.00000017 RMS(Int)=  0.00000001
 ITry= 1 IFail=0 DXMaxC= 3.01D-03 DCOld= 1.00D+10 DXMaxT= 3.00D-01 DXLimC= 3.00D+00 Rises=F
 Variable       Old X    -DE/DX   Delta X   Delta X   Delta X     New X
                                 (Linear)    (Quad)   (Total)
    R1        2.60727   0.00014   0.00016  -0.00001   0.00015   2.60741
    R2        2.65699   0.00003   0.00007  -0.00008  -0.00001   2.65698
    R3        2.04838   0.00003   0.00006  -0.00002   0.00004   2.04843
    R4        2.66832   0.00032   0.00017   0.00039   0.00056   2.66888
    R5        2.04799   0.00001   0.00006  -0.00009  -0.00002   2.04796
    R6        2.66734   0.00014   0.00015   0.00005   0.00020   2.66753
    R7        2.73955   0.00003   0.00025  -0.00040  -0.00015   2.73940
    R8        2.65416   0.00030   0.00030   0.00012   0.00042   2.65458
    R9        2.77147   0.00050   0.00023   0.00094   0.00117   2.77264
   R10        2.61264   0.00015   0.00015   0.00003   0.00017   2.61282
   R11        2.04755   0.00003   0.00006  -0.00003   0.00003   2.04758
   R12        2.04821   0.00004   0.00006  -0.00001   0.00006   2.04827
   R13        2.34790  -0.00083   0.00026  -0.00137  -0.00111   2.34679
   R14        2.77325   0.00055   0.00024   0.00105   0.00130   2.77455
   R15        2.73106  -0.00004   0.00025  -0.00057  -0.00032   2.73074
   R16        2.40238   0.00058   0.00001   0.00070   0.00071   2.40309
   R17        2.66728   0.00018   0.00011   0.00020   0.00031   2.66759
   R18        2.65235   0.00028   0.00031   0.00006   0.00037   2.65272
   R19        2.66999   0.00030   0.00014   0.00041   0.00055   2.67054
   R20        2.60664   0.00019   0.00013   0.00013   0.00026   2.60690
   R21        2.04550   0.00000   0.00006  -0.00010  -0.00004   2.04546
   R22        2.60279   0.00011   0.00016  -0.00008   0.00009   2.60288
   R23        2.04792   0.00001   0.00007  -0.00008  -0.00001   2.04790
   R24        2.65724   0.00013   0.00006   0.00018   0.00023   2.65747
   R25        3.61321   0.00024   0.00024   0.00087   0.00111   3.61432
   R26        2.04510   0.00002   0.00007  -0.00008  -0.00001   2.04509
    A1        2.09725   0.00003  -0.00001   0.00010   0.00009   2.09734
    A2        2.08980   0.00003   0.00001   0.00023   0.00025   2.09004
    A3        2.09614  -0.00007   0.00000  -0.00033  -0.00033   2.09580
    A4        2.09595   0.00009   0.00007   0.00025   0.00031   2.09626
    A5        2.10927  -0.00004  -0.00010   0.00003  -0.00007   2.10920
    A6        2.07796  -0.00005   0.00003  -0.00027  -0.00024   2.07772
    A7        2.09378  -0.00011  -0.00003  -0.00032  -0.00035   2.09344
    A8        2.08796   0.00015   0.00002   0.00053   0.00055   2.08851
    A9        2.10144  -0.00004   0.00000  -0.00021  -0.00021   2.10124
   A10        2.07324  -0.00006  -0.00006  -0.00011  -0.00017   2.07307
   A11        2.13283   0.00002  -0.00012   0.00033   0.00021   2.13304
   A12        2.07712   0.00003   0.00017  -0.00022  -0.00005   2.07707
   A13        2.10960   0.00012   0.00004   0.00045   0.00050   2.11010
   A14        2.05589  -0.00020   0.00022  -0.00148  -0.00125   2.05463
   A15        2.11770   0.00008  -0.00026   0.00102   0.00076   2.11846
   A16        2.09654  -0.00008  -0.00001  -0.00037  -0.00038   2.09616
   A17        2.09455  -0.00002   0.00000  -0.00018  -0.00018   2.09436
   A18        2.09210   0.00010   0.00001   0.00055   0.00056   2.09266
   A19        2.13340   0.00008  -0.00010   0.00041   0.00030   2.13371
   A20        2.02207  -0.00017   0.00018  -0.00083  -0.00066   2.02141
   A21        2.12771   0.00009  -0.00007   0.00043   0.00035   2.12807
   A22        2.07431   0.00022   0.00003   0.00065   0.00068   2.07499
   A23        2.10428  -0.00012  -0.00001  -0.00038  -0.00039   2.10389
   A24        2.10460  -0.00010  -0.00002  -0.00027  -0.00029   2.10431
   A25        2.13259   0.00002  -0.00013   0.00036   0.00023   2.13282
   A26        2.06968   0.00003   0.00019  -0.00025  -0.00006   2.06963
   A27        2.08091  -0.00005  -0.00006  -0.00011  -0.00017   2.08074
   A28        2.10313  -0.00005   0.00003  -0.00029  -0.00026   2.10287
   A29        2.09079   0.00014   0.00001   0.00053   0.00054   2.09133
   A30        2.08926  -0.00009  -0.00004  -0.00024  -0.00028   2.08898
   A31        2.09137   0.00013   0.00009   0.00042   0.00050   2.09187
   A32        2.06311  -0.00016   0.00013  -0.00105  -0.00092   2.06219
   A33        2.12870   0.00003  -0.00021   0.00063   0.00042   2.12913
   A34        2.10547   0.00008   0.00007   0.00019   0.00026   2.10573
   A35        2.08114  -0.00007   0.00002  -0.00037  -0.00035   2.08079
   A36        2.09657  -0.00001  -0.00009   0.00018   0.00009   2.09666
   A37        2.12243  -0.00012  -0.00008  -0.00037  -0.00045   2.12198
   A38        2.08354   0.00013   0.00002   0.00048   0.00050   2.08404
   A39        2.07722  -0.00001   0.00006  -0.00011  -0.00005   2.07717
   A40        2.07694   0.00005   0.00003   0.00012   0.00014   2.07708
   A41        2.10174   0.00008  -0.00008   0.00068   0.00060   2.10234
   A42        2.10451  -0.00013   0.00005  -0.00080  -0.00074   2.10377
    D1        0.00000   0.00000   0.00000   0.00000   0.00000   0.00000
    D2       -3.14159   0.00000   0.00000   0.00000   0.00000  -3.14159
    D3        3.14159   0.00000   0.00000   0.00000   0.00000   3.14159
    D4        0.00000   0.00000   0.00000   0.00000   0.00000   0.00000
    D5       -0.00001   0.00000   0.00000   0.00001   0.00001   0.00000
    D6        3.14159   0.00000   0.00000   0.00000   0.00000   3.14159
    D7        3.14159   0.00000   0.00000   0.00001   0.00001  -3.14159
    D8        0.00000   0.00000   0.00000   0.00000   0.00000   0.00000
    D9        0.00000   0.00000   0.00000   0.00000   0.00000   0.00000
   D10       -3.14158   0.00000   0.00000  -0.00001  -0.00001   3.14159
   D11       -3.14159   0.00000   0.00000   0.00000   0.00000  -3.14159
   D12        0.00001   0.00000   0.00000  -0.00002  -0.00002   0.00000
   D13        0.00000   0.00000   0.00000   0.00000   0.00000  -0.00001
   D14        3.14157   0.00000   0.00000   0.00003   0.00003  -3.14159
   D15        3.14158   0.00000   0.00000   0.00001   0.00001   3.14159
   D16       -0.00003   0.00000   0.00000   0.00004   0.00004   0.00001
   D17       -3.14158   0.00000   0.00000  -0.00001  -0.00001   3.14159
   D18       -0.00007   0.00000   0.00001   0.00006   0.00007   0.00000
   D19        0.00002   0.00000   0.00000  -0.00002  -0.00002  -0.00001
   D20        3.14153   0.00000   0.00001   0.00005   0.00005   3.14159
   D21        0.00000   0.00000   0.00000   0.00000   0.00001   0.00001
   D22        3.14159   0.00000   0.00000   0.00001   0.00001  -3.14159
   D23       -3.14158   0.00000   0.00000  -0.00002  -0.00002   3.14159
   D24        0.00001   0.00000   0.00000  -0.00002  -0.00002  -0.00001
   D25        3.14157   0.00000   0.00001   0.00007   0.00008  -3.14153
   D26        0.00004   0.00000   0.00000  -0.00005  -0.00005  -0.00001
   D27       -0.00004   0.00000   0.00001   0.00010   0.00011   0.00007
   D28       -3.14157   0.00000   0.00000  -0.00003  -0.00002   3.14159
   D29        0.00001   0.00000   0.00000  -0.00001  -0.00001   0.00000
   D30       -3.14159   0.00000   0.00000   0.00000   0.00000   3.14159
   D31       -3.14158   0.00000   0.00000  -0.00001  -0.00001   3.14159
   D32        0.00000   0.00000   0.00000   0.00000   0.00000   0.00000
   D33       -0.00004   0.00000   0.00000   0.00005   0.00005   0.00001
   D34        3.14157   0.00000   0.00000   0.00003   0.00002  -3.14159
   D35       -3.14157   0.00000  -0.00001  -0.00007  -0.00008   3.14154
   D36        0.00004   0.00000  -0.00001  -0.00010  -0.00011  -0.00007
   D37       -0.00002   0.00000   0.00000   0.00002   0.00002   0.00001
   D38        3.14158   0.00000   0.00000   0.00001   0.00001  -3.14159
   D39       -3.14153   0.00000  -0.00001  -0.00005  -0.00005  -3.14159
   D40        0.00006   0.00000  -0.00001  -0.00006  -0.00007   0.00000
   D41        0.00003   0.00000   0.00000  -0.00004  -0.00004  -0.00001
   D42       -3.14157   0.00000   0.00000  -0.00003  -0.00003   3.14159
   D43       -3.14158   0.00000   0.00000  -0.00001  -0.00001   3.14159
   D44        0.00001   0.00000   0.00000   0.00000   0.00000   0.00001
   D45        3.14158   0.00000   0.00000   0.00002   0.00002  -3.14159
   D46       -0.00001   0.00000   0.00000   0.00002   0.00002   0.00001
   D47        0.00000   0.00000   0.00000   0.00000   0.00000   0.00000
   D48       -3.14159   0.00000   0.00000  -0.00001  -0.00001   3.14159
   D49        3.14158   0.00000   0.00000   0.00001   0.00001  -3.14159
   D50       -0.00001   0.00000   0.00000   0.00002   0.00002   0.00001
   D51       -0.00001   0.00000   0.00000   0.00000   0.00000   0.00000
   D52        3.14159   0.00000   0.00000   0.00000   0.00000   3.14159
   D53        0.00000   0.00000   0.00000   0.00000   0.00001   0.00000
   D54        3.14159   0.00000   0.00000   0.00000   0.00000  -3.14159
   D55        3.14158   0.00000   0.00000   0.00001   0.00001  -3.14159
   D56       -0.00001   0.00000   0.00000   0.00001   0.00001   0.00000
   D57        0.00000   0.00000   0.00000   0.00000   0.00000   0.00000
   D58       -3.14159   0.00000   0.00000   0.00000   0.00000  -3.14159
   D59       -3.14159   0.00000   0.00000   0.00000   0.00000   3.14159
   D60        0.00000   0.00000   0.00000   0.00000   0.00000   0.00000
   D61        0.00000   0.00000   0.00000   0.00000   0.00000   0.00000
   D62       -3.14159   0.00000   0.00000   0.00000  -0.00001   3.14159
   D63       -3.14159   0.00000   0.00000   0.00000   0.00000  -3.14159
   D64        0.00000   0.00000   0.00000   0.00000   0.00000   0.00000
         Item               Value     Threshold  Converged?
 Maximum Force            0.000829     0.000450     NO 
 RMS     Force            0.000139     0.000300     YES
 Maximum Displacement     0.003010     0.001800     NO 
 RMS     Displacement     0.000562     0.001200     YES
 Predicted change in Energy=-2.725025D-06
 Lowest energy point so far.  Saving SCF results.
 GradGradGradGradGradGradGradGradGradGradGradGradGradGradGradGradGradGrad

 Leave Link  103 at Sun Jan 12 00:26:05 2020, MaxMem=   183500800 cpu:         1.0
 (Enter E:\Gaussian\G09W\l202.exe)
                          Input orientation:                          
 ---------------------------------------------------------------------
 Center     Atomic      Atomic             Coordinates (Angstroms)
 Number     Number       Type             X           Y           Z
 ---------------------------------------------------------------------
      1          6           0       -3.691819    0.256260   -0.000024
      2          6           0       -2.664982    1.177893    0.000036
      3          6           0       -1.321669    0.741849    0.000027
      4          6           0       -1.029110   -0.639100   -0.000048
      5          6           0       -2.093461   -1.555867   -0.000105
      6          6           0       -3.405718   -1.120339   -0.000096
      7          1           0       -4.720741    0.597340   -0.000014
      8          1           0       -2.872900    2.241496    0.000093
      9          1           0       -1.849389   -2.611553   -0.000158
     10          1           0       -4.214508   -1.841929   -0.000142
     11          6           0        0.347395   -1.146996   -0.000053
     12          8           0        0.605585   -2.361727   -0.000180
     13          6           0       -0.250387    1.718467    0.000090
     14          6           0        1.404817   -0.128394    0.000007
     15          6           0        1.117902    1.253770    0.000083
     16          6           0        2.743676   -0.550286    0.000001
     17          6           0        2.177671    2.188643    0.000144
     18          6           0        3.758246    0.384436    0.000064
     19          1           0        2.943983   -1.614000   -0.000053
     20          6           0        3.488132    1.764524    0.000136
     21          1           0        1.948725    3.247888    0.000201
     22          1           0        4.297271    2.483191    0.000185
     23         35           0        5.577883   -0.204655    0.000055
     24          8           0       -0.510643    2.963211    0.000153
 ---------------------------------------------------------------------
                    Distance matrix (angstroms):
                    1          2          3          4          5
     1  C    0.000000
     2  C    1.379784   0.000000
     3  C    2.419382   1.412312   0.000000
     4  C    2.809215   2.444901   1.411598   0.000000
     5  C    2.416310   2.792863   2.423874   1.404745   0.000000
     6  C    1.406015   2.414655   2.794818   2.424842   1.382643
     7  H    1.083981   2.136162   3.402143   3.893189   3.396896
     8  H    2.147508   1.083735   2.157605   3.420146   3.876531
     9  H    3.408651   3.876222   3.394672   2.136219   1.083533
    10  H    2.162313   3.394165   3.878715   3.404932   2.140250
    11  C    4.276024   3.805197   2.520617   1.467216   2.474865
    12  O    5.032051   4.819286   3.653285   2.374800   2.816782
    13  C    3.739186   2.474367   1.449630   2.482847   3.757418
    14  C    5.111131   4.274301   2.862000   2.486930   3.778311
    15  C    4.912071   3.783645   2.492703   2.862274   4.266956
    16  C    6.485840   5.678044   4.265752   3.773831   4.940556
    17  C    6.179403   4.947010   3.786634   4.275462   5.680135
    18  C    7.451168   6.472050   5.092473   4.895549   6.165003
    19  H    6.894327   6.265394   4.872968   4.090953   5.037780
    20  C    7.336659   6.181015   4.917321   5.116921   6.494551
    21  H    6.384793   5.056795   4.120159   4.896547   6.278163
    22  H    8.293659   7.083556   5.882580   6.174061   7.560122
    23  Br   9.281154   8.358005   6.964171   6.621260   7.789435
    24  O    4.177017   2.797952   2.364785   3.639430   4.788254
                    6          7          8          9         10
     6  C    0.000000
     7  H    2.163263   0.000000
     8  H    3.403796   2.473411   0.000000
     9  H    2.155430   4.306003   4.959805   0.000000
    10  H    1.083897   2.491246   4.298171   2.487189   0.000000
    11  C    3.753207   5.359917   4.674631   2.640225   4.614530
    12  O    4.198999   6.093097   5.769708   2.467653   4.848040
    13  C    4.244400   4.608795   2.674161   4.615830   5.328290
    14  C    4.911741   6.168399   4.890321   4.093402   5.874778
    15  C    5.108770   5.875428   4.111217   4.872940   6.165870
    16  C    6.175759   7.552123   6.272159   5.034388   7.077052
    17  C    6.490269   7.079572   5.050848   6.265709   7.556816
    18  C    7.320295   8.481659   6.886274   6.357792   8.277772
    19  H    6.368862   7.977344   6.978609   4.896073   7.162119
    20  C    7.473125   8.291436   6.378890   6.902115   8.505126
    21  H    6.910243   7.176850   4.925535   6.982745   7.993227
    22  H    8.504203   9.213087   7.174243   7.983599   9.547620
    23  Br   9.030147  10.329803   8.797692   7.807530   9.928322
    24  O    5.005680   4.829313   2.470047   5.733257   6.066958
                   11         12         13         14         15
    11  C    0.000000
    12  O    1.241867   0.000000
    13  C    2.927152   4.169013   0.000000
    14  C    1.468228   2.372035   2.480039   0.000000
    15  C    2.521380   3.651615   1.445045   1.411629   0.000000
    16  C    2.469458   2.802276   3.756548   1.403758   2.428531
    17  C    3.804787   4.814284   2.473162   2.442532   1.413188
    18  C    3.738875   4.180991   4.224781   2.408656   2.779777
    19  H    2.638250   2.455036   4.616204   2.139173   3.399806
    20  C    4.282661   5.033392   3.738803   2.814843   2.424637
    21  H    4.677527   5.768172   2.678660   3.419812   2.160271
    22  H    5.364679   6.091123   4.611506   3.897007   3.408792
    23  Br   5.314697   5.420028   6.137354   4.173762   4.692380
    24  O    4.198813   5.440674   1.271661   3.636895   2.361005
                   16         17         18         19         20
    16  C    0.000000
    17  C    2.796801   0.000000
    18  C    1.379514   2.398621   0.000000
    19  H    1.082410   3.879089   2.157955   0.000000
    20  C    2.431576   1.377383   1.406273   3.422065   0.000000
    21  H    3.880473   1.083704   3.387288   4.962710   2.137789
    22  H    3.408173   2.139967   2.166869   4.314901   1.082214
    23  Br   2.855204   4.158042   1.912617   2.987253   2.871362
    24  O    4.789076   2.797675   4.987333   5.734571   4.174572
                   21         22         23         24
    21  H    0.000000
    22  H    2.469904   0.000000
    23  Br   5.009075   2.977328   0.000000
    24  O    2.475789   4.831817   6.863346   0.000000
 Stoichiometry    C14H7BrO2
 Framework group  C1[X(C14H7BrO2)]
 Deg. of freedom    66
 Full point group                 C1      NOp   1
 RotChk:  IX=0 Diff= 1.29D-04
 Largest Abelian subgroup         C1      NOp   1
 Largest concise Abelian subgroup C1      NOp   1
                         Standard orientation:                         
 ---------------------------------------------------------------------
 Center     Atomic      Atomic             Coordinates (Angstroms)
 Number     Number       Type             X           Y           Z
 ---------------------------------------------------------------------
      1          6           0        5.065101    0.069605    0.000048
      2          6           0        4.038628    0.991644   -0.000012
      3          6           0        2.695143    0.556132   -0.000003
      4          6           0        2.402038   -0.824701    0.000071
      5          6           0        3.466027   -1.741890    0.000129
      6          6           0        4.778455   -1.306880    0.000120
      7          1           0        6.094157    0.410279    0.000038
      8          1           0        4.246967    2.055165   -0.000069
      9          1           0        3.221537   -2.797479    0.000182
     10          1           0        5.586960   -2.028790    0.000166
     11          6           0        1.025332   -1.332053    0.000077
     12          8           0        0.766662   -2.546683    0.000204
     13          6           0        1.624247    1.533173   -0.000066
     14          6           0       -0.031687   -0.313033    0.000017
     15          6           0        0.255775    1.069017   -0.000059
     16          6           0       -1.370713   -0.734396    0.000023
     17          6           0       -0.803625    2.004309   -0.000120
     18          6           0       -2.384913    0.200727   -0.000040
     19          1           0       -1.571441   -1.798031    0.000077
     20          6           0       -2.114254    1.580709   -0.000112
     21          1           0       -0.574260    3.063463   -0.000177
     22          1           0       -2.923108    2.299696   -0.000161
     23         35           0       -4.204782   -0.387644   -0.000031
     24          8           0        1.884995    2.777814   -0.000129
 ---------------------------------------------------------------------
 Rotational constants (GHZ):      1.0041772      0.1781400      0.1512996
 Leave Link  202 at Sun Jan 12 00:26:05 2020, MaxMem=   183500800 cpu:         0.0
 (Enter E:\Gaussian\G09W\l301.exe)
 Standard basis: 6-311G(d) (5D, 7F)
 Ernie: Thresh=  0.10000D-02 Tol=  0.10000D-05 Strict=F.
 There are   372 symmetry adapted cartesian basis functions of A   symmetry.
 There are   353 symmetry adapted basis functions of A   symmetry.
   353 basis functions,   637 primitive gaussians,   372 cartesian basis functions
    71 alpha electrons       71 beta electrons
       nuclear repulsion energy      1374.3138835722 Hartrees.
 IExCor=  402 DFT=T Ex+Corr=B3LYP ExCW=0 ScaHFX=  0.200000
 ScaDFX=  0.800000  0.720000  1.000000  0.810000 ScalE2=  1.000000  1.000000
 IRadAn=      0 IRanWt=     -1 IRanGd=            0 ICorTp=0 IEmpDi=141
 NAtoms=   24 NActive=   24 NUniq=   24 SFac= 1.00D+00 NAtFMM=   60 NAOKFM=F Big=F
 Integral buffers will be    262144 words long.
 Regular integral format.
 Two-electron integral symmetry is turned on.
 R6Disp:  Grimme-D3(BJ) Dispersion energy=       -0.0620488863 Hartrees.
 Nuclear repulsion after empirical dispersion term =     1374.2518346859 Hartrees.
 ------------------------------------------------------------------------------
 Polarizable Continuum Model (PCM)
 =================================
 Model                : PCM (using non-symmetric T matrix).
 Atomic radii         : UFF (Universal Force Field).
 Polarization charges : Total charges.
 Charge compensation  : None.
 Solution method      : On-the-fly selection.
 Cavity type          : Scaled VdW (van der Waals Surface) (Alpha=1.100).
 Cavity algorithm     : GePol (No added spheres)
                        Default sphere list used, NSphG=   24.
                        Lebedev-Laikov grids with approx.  5.0 points / Ang**2.
                        Smoothing algorithm: Karplus/York (Gamma=1.0000).
                        Polarization charges: spherical gaussians, with
                                              point-specific exponents (IZeta= 3).
                        Self-potential: point-specific (ISelfS= 7).
                        Self-field    : sphere-specific E.n sum rule (ISelfD= 2).
 1st derivatives      : Analytical E(r).r(x)/FMM algorithm (CHGder, D1EAlg=3).
                        Cavity 1st derivative terms included.
 Solvent              : Acetonitrile, Eps=  35.688000 Eps(inf)=   1.806874
 ------------------------------------------------------------------------------
 GePol: Number of generator spheres                  =      24
 GePol: Total number of spheres                      =      24
 GePol: Number of exposed spheres                    =      24 (100.00%)
 GePol: Number of points                             =    2166
 GePol: Average weight of points                     =       0.13
 GePol: Minimum weight of points                     =   0.92D-09
 GePol: Maximum weight of points                     =    0.20577
 GePol: Number of points with low weight             =     119
 GePol: Fraction of low-weight points (<1% of avg)   =       5.49%
 GePol: Cavity surface area                          =    279.220 Ang**2
 GePol: Cavity volume                                =    305.124 Ang**3
 Leave Link  301 at Sun Jan 12 00:26:05 2020, MaxMem=   183500800 cpu:         0.0
 (Enter E:\Gaussian\G09W\l302.exe)
 NPDir=0 NMtPBC=     1 NCelOv=     1 NCel=       1 NClECP=     1 NCelD=      1
         NCelK=      1 NCelE2=     1 NClLst=     1 CellRange=     0.0.
 One-electron integrals computed using PRISM.
 NBasis=   353 RedAO= T EigKep=  9.43D-05  NBF=   353
 NBsUse=   353 1.00D-06 EigRej= -1.00D+00 NBFU=   353
 Precomputing XC quadrature grid using
 IXCGrd= 4 IRadAn=           0 IRanWt=          -1 IRanGd=           0 AccXCQ= 0.00D+00.
 Generated NRdTot=       0 NPtTot=           0 NUsed=           0 NTot=          16
 NSgBfM=   363   363   363   363   363 MxSgAt=    24 MxSgA2=    24.
 Leave Link  302 at Sun Jan 12 00:26:07 2020, MaxMem=   183500800 cpu:         1.0
 (Enter E:\Gaussian\G09W\l308.exe)
 Leave Link  308 at Sun Jan 12 00:26:08 2020, MaxMem=   183500800 cpu:         1.0
 (Enter E:\Gaussian\G09W\l303.exe)
 DipDrv:  MaxL=1.
 Leave Link  303 at Sun Jan 12 00:26:08 2020, MaxMem=   183500800 cpu:         0.0
 (Enter E:\Gaussian\G09W\l401.exe)
 Initial guess from the checkpoint file:  "E:\Gaussian file\2-BrAQ excited singlet opt.chk"
 B after Tr=     0.000000    0.000000    0.000000
         Rot=    1.000000    0.000002    0.000000   -0.000018 Ang=   0.00 deg.
 Guess basis will be translated and rotated to current coordinates.
 JPrj=2 DoOrth=T DoCkMO=T.
 Leave Link  401 at Sun Jan 12 00:26:10 2020, MaxMem=   183500800 cpu:         2.0
 (Enter E:\Gaussian\G09W\l502.exe)
 Closed shell SCF:
 Using DIIS extrapolation, IDIIS=  1040.
 Integral symmetry usage will be decided dynamically.
 IVT=      438130 IEndB=      438130 NGot=   183500800 MDV=   183218067
 LenX=   183218067 LenY=   183079242
 Requested convergence on RMS density matrix=1.00D-08 within 128 cycles.
 Requested convergence on MAX density matrix=1.00D-06.
 Requested convergence on             energy=1.00D-06.
 No special actions if energy rises.
 Fock matrices will be formed incrementally for  20 cycles.

 Cycle   1  Pass 1  IDiag  1:
 FoFJK:  IHMeth= 1 ICntrl=       0 DoSepK=F KAlg= 0 I1Cent=   0 FoldK=F
 IRaf= 780000000 NMat=   1 IRICut=       1 DoRegI=T DoRafI=F ISym2E= 0.
 FoFCou: FMM=F IPFlag=           0 FMFlag=      100000 FMFlg1=           0
         NFxFlg=           0 DoJE=F BraDBF=F KetDBF=F FulRan=T
         wScrn=  0.000000 ICntrl=       0 IOpCl=  0 I1Cent=           0 NGrid=           0
         NMat0=    1 NMatS0=      1 NMatT0=    0 NMatD0=    1 NMtDS0=    0 NMtDT0=    0
 Symmetry not used in FoFCou.
 Inv3:  Mode=1 IEnd=    14074668.
 Iteration    1 A*A^-1 deviation from unit magnitude is 3.22D-15 for   1245.
 Iteration    1 A*A^-1 deviation from orthogonality  is 2.33D-15 for   1448   1245.
 Iteration    1 A^-1*A deviation from unit magnitude is 2.22D-15 for    317.
 Iteration    1 A^-1*A deviation from orthogonality  is 5.59D-14 for   1570   1451.
 E= -3262.53745175822    
 DIIS: error= 6.56D-05 at cycle   1 NSaved=   1.
 NSaved= 1 IEnMin= 1 EnMin= -3262.53745175822     IErMin= 1 ErrMin= 6.56D-05
 ErrMax= 6.56D-05  0.00D+00 EMaxC= 1.00D-01 BMatC= 1.17D-06 BMatP= 1.17D-06
 IDIUse=1 WtCom= 1.00D+00 WtEn= 0.00D+00
 Coeff-Com:  0.100D+01
 Coeff:      0.100D+01
 Gap=     0.813 Goal=   None    Shift=    0.000
 RMSDP=1.25D-05 MaxDP=5.13D-04              OVMax= 3.39D-04

 Cycle   2  Pass 1  IDiag  1:
 RMSU=  1.23D-05    CP:  1.00D+00
 E= -3262.53745257540     Delta-E=       -0.000000817184 Rises=F Damp=F
 DIIS: error= 6.33D-05 at cycle   2 NSaved=   2.
 NSaved= 2 IEnMin= 2 EnMin= -3262.53745257540     IErMin= 2 ErrMin= 6.33D-05
 ErrMax= 6.33D-05  0.00D+00 EMaxC= 1.00D-01 BMatC= 6.90D-07 BMatP= 1.17D-06
 IDIUse=1 WtCom= 1.00D+00 WtEn= 0.00D+00
 Coeff-Com:  0.405D+00 0.595D+00
 Coeff:      0.405D+00 0.595D+00
 Gap=     0.138 Goal=   None    Shift=    0.000
 RMSDP=5.83D-06 MaxDP=2.37D-04 DE=-8.17D-07 OVMax= 3.42D-04

 Cycle   3  Pass 1  IDiag  1:
 RMSU=  4.65D-06    CP:  1.00D+00  7.15D-01
 E= -3262.53745263724     Delta-E=       -0.000000061840 Rises=F Damp=F
 DIIS: error= 6.44D-05 at cycle   3 NSaved=   3.
 NSaved= 3 IEnMin= 3 EnMin= -3262.53745263724     IErMin= 2 ErrMin= 6.33D-05
 ErrMax= 6.44D-05  0.00D+00 EMaxC= 1.00D-01 BMatC= 5.95D-07 BMatP= 6.90D-07
 IDIUse=1 WtCom= 1.00D+00 WtEn= 0.00D+00
 Coeff-Com:  0.383D-02 0.480D+00 0.516D+00
 Coeff:      0.383D-02 0.480D+00 0.516D+00
 Gap=     0.138 Goal=   None    Shift=    0.000
 RMSDP=3.90D-06 MaxDP=1.45D-04 DE=-6.18D-08 OVMax= 1.71D-04

 Cycle   4  Pass 1  IDiag  1:
 RMSU=  7.53D-07    CP:  1.00D+00  9.34D-01  4.19D-01
 E= -3262.53745307274     Delta-E=       -0.000000435502 Rises=F Damp=F
 DIIS: error= 5.51D-06 at cycle   4 NSaved=   4.
 NSaved= 4 IEnMin= 4 EnMin= -3262.53745307274     IErMin= 4 ErrMin= 5.51D-06
 ErrMax= 5.51D-06  0.00D+00 EMaxC= 1.00D-01 BMatC= 7.66D-09 BMatP= 5.95D-07
 IDIUse=1 WtCom= 1.00D+00 WtEn= 0.00D+00
 Coeff-Com: -0.888D-02 0.194D+00 0.240D+00 0.574D+00
 Coeff:     -0.888D-02 0.194D+00 0.240D+00 0.574D+00
 Gap=     0.138 Goal=   None    Shift=    0.000
 RMSDP=3.46D-07 MaxDP=1.33D-05 DE=-4.36D-07 OVMax= 2.37D-05

 Cycle   5  Pass 1  IDiag  1:
 RMSU=  2.07D-07    CP:  1.00D+00  9.22D-01  4.49D-01  7.49D-01
 E= -3262.53745307816     Delta-E=       -0.000000005414 Rises=F Damp=F
 DIIS: error= 1.79D-06 at cycle   5 NSaved=   5.
 NSaved= 5 IEnMin= 5 EnMin= -3262.53745307816     IErMin= 5 ErrMin= 1.79D-06
 ErrMax= 1.79D-06  0.00D+00 EMaxC= 1.00D-01 BMatC= 1.28D-09 BMatP= 7.66D-09
 IDIUse=1 WtCom= 1.00D+00 WtEn= 0.00D+00
 Coeff-Com: -0.508D-02 0.557D-01 0.832D-01 0.327D+00 0.540D+00
 Coeff:     -0.508D-02 0.557D-01 0.832D-01 0.327D+00 0.540D+00
 Gap=     0.138 Goal=   None    Shift=    0.000
 RMSDP=1.30D-07 MaxDP=6.08D-06 DE=-5.41D-09 OVMax= 1.34D-05

 Cycle   6  Pass 1  IDiag  1:
 RMSU=  8.79D-08    CP:  1.00D+00  9.19D-01  4.48D-01  7.52D-01  5.96D-01
 E= -3262.53745307926     Delta-E=       -0.000000001102 Rises=F Damp=F
 DIIS: error= 8.87D-07 at cycle   6 NSaved=   6.
 NSaved= 6 IEnMin= 6 EnMin= -3262.53745307926     IErMin= 6 ErrMin= 8.87D-07
 ErrMax= 8.87D-07  0.00D+00 EMaxC= 1.00D-01 BMatC= 1.19D-10 BMatP= 1.28D-09
 IDIUse=1 WtCom= 1.00D+00 WtEn= 0.00D+00
 Coeff-Com: -0.204D-02 0.165D-01 0.299D-01 0.146D+00 0.310D+00 0.500D+00
 Coeff:     -0.204D-02 0.165D-01 0.299D-01 0.146D+00 0.310D+00 0.500D+00
 Gap=     0.138 Goal=   None    Shift=    0.000
 RMSDP=6.10D-08 MaxDP=2.55D-06 DE=-1.10D-09 OVMax= 4.22D-06

 Cycle   7  Pass 1  IDiag  1:
 RMSU=  2.77D-08    CP:  1.00D+00  9.20D-01  4.54D-01  7.67D-01  6.98D-01
                    CP:  5.93D-01
 E= -3262.53745307930     Delta-E=       -0.000000000037 Rises=F Damp=F
 DIIS: error= 2.94D-07 at cycle   7 NSaved=   7.
 NSaved= 7 IEnMin= 7 EnMin= -3262.53745307930     IErMin= 7 ErrMin= 2.94D-07
 ErrMax= 2.94D-07  0.00D+00 EMaxC= 1.00D-01 BMatC= 1.57D-11 BMatP= 1.19D-10
 IDIUse=1 WtCom= 1.00D+00 WtEn= 0.00D+00
 Coeff-Com: -0.340D-03 0.343D-03 0.359D-02 0.297D-01 0.881D-01 0.300D+00
 Coeff-Com:  0.578D+00
 Coeff:     -0.340D-03 0.343D-03 0.359D-02 0.297D-01 0.881D-01 0.300D+00
 Coeff:      0.578D+00
 Gap=     0.138 Goal=   None    Shift=    0.000
 RMSDP=2.18D-08 MaxDP=9.38D-07 DE=-3.73D-11 OVMax= 1.24D-06

 Cycle   8  Pass 1  IDiag  1:
 RMSU=  9.30D-09    CP:  1.00D+00  9.19D-01  4.53D-01  7.64D-01  6.71D-01
                    CP:  7.25D-01  6.12D-01
 E= -3262.53745307937     Delta-E=       -0.000000000072 Rises=F Damp=F
 DIIS: error= 1.31D-07 at cycle   8 NSaved=   8.
 NSaved= 8 IEnMin= 8 EnMin= -3262.53745307937     IErMin= 8 ErrMin= 1.31D-07
 ErrMax= 1.31D-07  0.00D+00 EMaxC= 1.00D-01 BMatC= 2.91D-12 BMatP= 1.57D-11
 IDIUse=1 WtCom= 1.00D+00 WtEn= 0.00D+00
 Coeff-Com: -0.319D-04-0.153D-02-0.113D-02 0.314D-02 0.208D-01 0.136D+00
 Coeff-Com:  0.377D+00 0.465D+00
 Coeff:     -0.319D-04-0.153D-02-0.113D-02 0.314D-02 0.208D-01 0.136D+00
 Coeff:      0.377D+00 0.465D+00
 Gap=     0.138 Goal=   None    Shift=    0.000
 RMSDP=8.82D-09 MaxDP=3.01D-07 DE=-7.19D-11 OVMax= 4.99D-07

 Error on total polarization charges =  0.01381
 SCF Done:  E(RB3LYP) =  -3262.53745308     A.U. after    8 cycles
            NFock=  8  Conv=0.88D-08     -V/T= 2.0018
 KE= 3.256751668001D+03 PE=-1.050477332528D+04 EE= 2.611232369519D+03
 Leave Link  502 at Sun Jan 12 00:34:10 2020, MaxMem=   183500800 cpu:       480.0
 (Enter E:\Gaussian\G09W\l801.exe)
 DoSCS=F DFT=T ScalE2(SS,OS)=  1.000000  1.000000
 ExpMin= 1.03D-01 ExpMax= 4.40D+05 ExpMxC= 1.51D+04 IAcc=3 IRadAn=         5 AccDes= 0.00D+00
 HarFok:  IExCor=  205 AccDes= 0.00D+00 IRadAn=         5 IDoV=-2 UseB2=F ITyADJ=14
 ICtDFT= 12500011 ScaDFX=  1.000000  1.000000  1.000000  1.000000
 Largest valence mixing into a core orbital is  2.27D-04
 Largest core mixing into a valence orbital is  2.00D-05
 Range of M.O.s used for correlation:    31   353
 NBasis=   353 NAE=    71 NBE=    71 NFC=    30 NFV=     0
 NROrb=    323 NOA=    41 NOB=    41 NVA=   282 NVB=   282

 **** Warning!!: The largest alpha MO coefficient is  0.24645758D+02

 Leave Link  801 at Sun Jan 12 00:34:12 2020, MaxMem=   183500800 cpu:         1.0
 (Enter E:\Gaussian\G09W\l914.exe)
 RHF ground state
 MDV=   183500800 DFT=T DoStab=F Mixed=T DoRPA=T DoScal=F NonHer=T
 NEqPCM:  Using equilibrium solvation (IEInf=0, Eps=  35.6880, EpsInf=   1.8069)
 Making orbital integer symmetry assigments:
 Orbital symmetries:
       Occupied  (A) (A) (A) (A) (A) (A) (A) (A) (A) (A) (A) (A)
                 (A) (A) (A) (A) (A) (A) (A) (A) (A) (A) (A) (A)
                 (A) (A) (A) (A) (A) (A) (A) (A) (A) (A) (A) (A)
                 (A) (A) (A) (A) (A) (A) (A) (A) (A) (A) (A) (A)
                 (A) (A) (A) (A) (A) (A) (A) (A) (A) (A) (A) (A)
                 (A) (A) (A) (A) (A) (A) (A) (A) (A) (A) (A)
       Virtual   (A) (A) (A) (A) (A) (A) (A) (A) (A) (A) (A) (A)
                 (A) (A) (A) (A) (A) (A) (A) (A) (A) (A) (A) (A)
                 (A) (A) (A) (A) (A) (A) (A) (A) (A) (A) (A) (A)
                 (A) (A) (A) (A) (A) (A) (A) (A) (A) (A) (A) (A)
                 (A) (A) (A) (A) (A) (A) (A) (A) (A) (A) (A) (A)
                 (A) (A) (A) (A) (A) (A) (A) (A) (A) (A) (A) (A)
                 (A) (A) (A) (A) (A) (A) (A) (A) (A) (A) (A) (A)
                 (A) (A) (A) (A) (A) (A) (A) (A) (A) (A) (A) (A)
                 (A) (A) (A) (A) (A) (A) (A) (A) (A) (A) (A) (A)
                 (A) (A) (A) (A) (A) (A) (A) (A) (A) (A) (A) (A)
                 (A) (A) (A) (A) (A) (A) (A) (A) (A) (A) (A) (A)
                 (A) (A) (A) (A) (A) (A) (A) (A) (A) (A) (A) (A)
                 (A) (A) (A) (A) (A) (A) (A) (A) (A) (A) (A) (A)
                 (A) (A) (A) (A) (A) (A) (A) (A) (A) (A) (A) (A)
                 (A) (A) (A) (A) (A) (A) (A) (A) (A) (A) (A) (A)
                 (A) (A) (A) (A) (A) (A) (A) (A) (A) (A) (A) (A)
                 (A) (A) (A) (A) (A) (A) (A) (A) (A) (A) (A) (A)
                 (A) (A) (A) (A) (A) (A) (A) (A) (A) (A) (A) (A)
                 (A) (A) (A) (A) (A) (A) (A) (A) (A) (A) (A) (A)
                 (A) (A) (A) (A) (A) (A) (A) (A) (A) (A) (A) (A)
                 (A) (A) (A) (A) (A) (A) (A) (A) (A) (A) (A) (A)
                 (A) (A) (A) (A) (A) (A) (A) (A) (A) (A) (A) (A)
                 (A) (A) (A) (A) (A) (A) (A) (A) (A) (A) (A) (A)
                 (A) (A) (A) (A) (A) (A)
 Generating guess from densities on rwf.
 Convergence on wavefunction:    0.000001000000000
 Davidson Disk Diagonalization:  ConvIn= 1.00D-06 SkipCon=T Conv= 1.00D-06.
 Max sub-space:   200 roots to seek:     5 dimension of matrix:        23124
 Iteration     1 Dimension    10 NMult     0 NNew     10
 CISAX will form    10 AO SS matrices at one time.
 NMat=    10 NSing=    10 JSym2X= 0.
 FoFJK:  IHMeth= 1 ICntrl=       0 DoSepK=F KAlg= 0 I1Cent=   0 FoldK=F
 IRaf=         0 NMat=  20 IRICut=       1 DoRegI=T DoRafI=F ISym2E= 0.
 FoFCou: FMM=F IPFlag=           0 FMFlag=      100000 FMFlg1=           0
         NFxFlg=           0 DoJE=F BraDBF=F KetDBF=F FulRan=T
         wScrn=  0.000000 ICntrl=       0 IOpCl=  0 I1Cent=           0 NGrid=           0
         NMat0=   20 NMatS0=     10 NMatT0=    0 NMatD0=   20 NMtDS0=    0 NMtDT0=    0
 Symmetry not used in FoFCou.
 Excitation Energies [eV] at current iteration:
 Root      1 :     2.768237963000333
 Root      2 :     3.042061123262874
 Root      3 :     3.108332280631707
 Root      4 :     3.473974644091332
 Root      5 :     3.559971800026379
 Iteration     2 Dimension    20 NMult    10 NNew     10
 CISAX will form    10 AO SS matrices at one time.
 NMat=    10 NSing=    10 JSym2X= 0.
 Root      1 not converged, maximum delta is    0.000509463753189
 Root      2 not converged, maximum delta is    0.000564873521954
 Root      3 not converged, maximum delta is    0.000562954995781
 Root      4 not converged, maximum delta is    0.000465678107810
 Root      5 not converged, maximum delta is    0.000425880042397
 Excitation Energies [eV] at current iteration:
 Root      1 :     2.768232515145204   Change is   -0.000005447855129
 Root      2 :     3.042051093501786   Change is   -0.000010029761088
 Root      3 :     3.108329508451028   Change is   -0.000002772180679
 Root      4 :     3.473971861612403   Change is   -0.000002782478929
 Root      5 :     3.559968817040805   Change is   -0.000002982985574
 Iteration     3 Dimension    30 NMult    20 NNew     10
 CISAX will form    10 AO SS matrices at one time.
 NMat=    10 NSing=    10 JSym2X= 0.
 Root      1 not converged, maximum delta is    0.000091522812427
 Root      2 not converged, maximum delta is    0.000091995557809
 Root      3 not converged, maximum delta is    0.000093162281488
 Root      4 not converged, maximum delta is    0.000100892647011
 Root      5 not converged, maximum delta is    0.000114296044217
 Excitation Energies [eV] at current iteration:
 Root      1 :     2.768232425305793   Change is   -0.000000089839411
 Root      2 :     3.042050899866272   Change is   -0.000000193635514
 Root      3 :     3.108329308513801   Change is   -0.000000199937227
 Root      4 :     3.473971489647133   Change is   -0.000000371965270
 Root      5 :     3.559968424173131   Change is   -0.000000392867674
 Iteration     4 Dimension    40 NMult    30 NNew     10
 CISAX will form    10 AO SS matrices at one time.
 NMat=    10 NSing=    10 JSym2X= 0.
 Root      1 not converged, maximum delta is    0.000010840574041
 Root      2 not converged, maximum delta is    0.000013239469060
 Root      3 not converged, maximum delta is    0.000016416476245
 Root      4 not converged, maximum delta is    0.000031179920707
 Root      5 not converged, maximum delta is    0.000052580001044
 Excitation Energies [eV] at current iteration:
 Root      1 :     2.768232422965897   Change is   -0.000000002339896
 Root      2 :     3.042050894633023   Change is   -0.000000005233250
 Root      3 :     3.108329289439898   Change is   -0.000000019073904
 Root      4 :     3.473971450936236   Change is   -0.000000038710897
 Root      5 :     3.559968377215462   Change is   -0.000000046957669
 Iteration     5 Dimension    50 NMult    40 NNew     10
 CISAX will form    10 AO SS matrices at one time.
 NMat=    10 NSing=    10 JSym2X= 0.
 Root      1 has converged.
 Root      2 not converged, maximum delta is    0.000001367013735
 Root      3 not converged, maximum delta is    0.000003756603986
 Root      4 not converged, maximum delta is    0.000014470372216
 Root      5 not converged, maximum delta is    0.000008203810483
 Excitation Energies [eV] at current iteration:
 Root      1 :     2.768232422875292   Change is   -0.000000000090605
 Root      2 :     3.042050894303711   Change is   -0.000000000329311
 Root      3 :     3.108329287318068   Change is   -0.000000002121829
 Root      4 :     3.473971442372339   Change is   -0.000000008563896
 Root      5 :     3.559968371078779   Change is   -0.000000006136683
 Iteration     6 Dimension    58 NMult    50 NNew      8
 CISAX will form     8 AO SS matrices at one time.
 NMat=     8 NSing=     8 JSym2X= 0.
 Root      1 has converged.
 Root      2 has converged.
 Root      3 has converged.
 Root      4 not converged, maximum delta is    0.000002558621740
 Root      5 not converged, maximum delta is    0.000001350236340
 Excitation Energies [eV] at current iteration:
 Root      1 :     2.768232422874223   Change is   -0.000000000001069
 Root      2 :     3.042050894275363   Change is   -0.000000000028348
 Root      3 :     3.108329287159912   Change is   -0.000000000158156
 Root      4 :     3.473971441727783   Change is   -0.000000000644556
 Root      5 :     3.559968370519417   Change is   -0.000000000559363
 Iteration     7 Dimension    62 NMult    58 NNew      4
 CISAX will form     4 AO SS matrices at one time.
 NMat=     4 NSing=     4 JSym2X= 0.
 Root      1 has converged.
 Root      2 has converged.
 Root      3 has converged.
 Root      4 not converged, maximum delta is    0.000001311728800
 Root      5 has converged.
 Excitation Energies [eV] at current iteration:
 Root      1 :     2.768232422873510   Change is   -0.000000000000713
 Root      2 :     3.042050894274823   Change is   -0.000000000000540
 Root      3 :     3.108329287154385   Change is   -0.000000000005527
 Root      4 :     3.473971441642878   Change is   -0.000000000084906
 Root      5 :     3.559968370463718   Change is   -0.000000000055699
 Iteration     8 Dimension    64 NMult    62 NNew      2
 CISAX will form     2 AO SS matrices at one time.
 NMat=     2 NSing=     2 JSym2X= 0.
 Root      1 has converged.
 Root      2 has converged.
 Root      3 has converged.
 Root      4 has converged.
 Root      5 has converged.
 Excitation Energies [eV] at current iteration:
 Root      1 :     2.768232422873599   Change is    0.000000000000089
 Root      2 :     3.042050894275417   Change is    0.000000000000594
 Root      3 :     3.108329287153697   Change is   -0.000000000000688
 Root      4 :     3.473971441637790   Change is   -0.000000000005088
 Root      5 :     3.559968370463210   Change is   -0.000000000000508
 Convergence achieved on expansion vectors.
 ***********************************************************************
 Excited states from <AA,BB:AA,BB> singles matrix:
 ***********************************************************************
 
 1PDM for each excited state written to RWF  633
 Ground to excited state transition densities written to RWF  633
 Ground to excited state transition electric dipole moments (Au):
       state          X           Y           Z        Dip. S.      Osc.
         1         0.0000      0.0000      0.0021      0.0000      0.0000
         2         0.0000      0.0000     -0.0011      0.0000      0.0000
         3         1.0118      0.1592      0.0000      1.0490      0.0799
         4         1.3155     -0.3146      0.0000      1.8295      0.1557
         5         1.1484      0.4228      0.0000      1.4976      0.1306
 Ground to excited state transition velocity dipole moments (Au):
       state          X           Y           Z        Dip. S.      Osc.
         1         0.0000      0.0000     -0.0003      0.0000      0.0000
         2         0.0000      0.0000      0.0003      0.0000      0.0000
         3        -0.1144     -0.0169      0.0000      0.0134      0.0780
         4        -0.1711      0.0403      0.0000      0.0309      0.1614
         5        -0.1501     -0.0513      0.0000      0.0252      0.1282
 Ground to excited state transition magnetic dipole moments (Au):
       state          X           Y           Z
         1        -0.1648     -0.7590      0.0000
         2         0.0552      0.2652      0.0001
         3         0.0000      0.0000      1.2169
         4         0.0000      0.0000     -0.0233
         5         0.0000      0.0000     -0.8090
 Ground to excited state transition velocity quadrupole moments (Au):
       state          XX          YY          ZZ          XY          XZ          YZ
         1         0.0000      0.0000      0.0000      0.0000      0.0180     -0.0043
         2         0.0001      0.0000      0.0000      0.0000     -0.0085      0.0015
         3         0.2732     -0.2168      0.0131      0.2491      0.0000      0.0000
         4        -1.5506      0.2107     -0.0181      0.2216      0.0000      0.0000
         5         0.2170     -0.1487      0.0240     -0.4517      0.0000      0.0000
 <0|del|b> * <b|rxdel|0> + <0|del|b> * <b|delr+rdel|0>
 Rotatory Strengths (R) in cgs (10**-40 erg-esu-cm/Gauss)
       state          XX          YY          ZZ    R(velocity)    E-M Angle
         1        -0.0010      0.0017      0.0008      0.0005       90.00
         2        -0.0021     -0.0007     -0.0029     -0.0019       90.00
         3        -0.0040      0.0010      0.0122      0.0031       90.00
         4         0.0034      0.0063     -0.0088      0.0003       90.00
         5         0.0036     -0.0084     -0.0038     -0.0029       90.00
 1/2[<0|r|b>*<b|rxdel|0> + (<0|rxdel|b>*<b|r|0>)*]
 Rotatory Strengths (R) in cgs (10**-40 erg-esu-cm/Gauss)
       state          XX          YY          ZZ     R(length)
         1         0.0034     -0.0023     -0.0001      0.0003
         2        -0.0017     -0.0045      0.0001     -0.0020
         3         0.0157     -0.0030     -0.0036      0.0030
         4        -0.0040      0.0045      0.0004      0.0003
         5        -0.0106      0.0065     -0.0047     -0.0029
  1/2[<0|del|b>*<b|r|0> + (<0|r|b>*<b|del|0>)*] (Au)
       state          X           Y           Z        Dip. S.   Osc.(frdel)
         1         0.0000      0.0000      0.0000      0.0000      0.0000
         2         0.0000      0.0000      0.0000      0.0000      0.0000
         3        -0.1157     -0.0027      0.0000      0.1184      0.0789
         4        -0.2251     -0.0127      0.0000      0.2378      0.1585
         5        -0.1724     -0.0217      0.0000      0.1941      0.1294

 Excitation energies and oscillator strengths:
 
 Excited State   1:      Singlet-A      2.7682 eV  447.88 nm  f=0.0000  <S**2>=0.000
      70 -> 72         0.69322
 This state for optimization and/or second-order correction.
 Total Energy, E(TD-HF/TD-KS) =  -3262.43572241    
 Copying the excited state density for this state as the 1-particle RhoCI density.
 
 Excited State   2:      Singlet-A      3.0421 eV  407.57 nm  f=0.0000  <S**2>=0.000
      67 -> 72         0.68742
      70 -> 73         0.11254
 
 Excited State   3:      Singlet-A      3.1083 eV  398.88 nm  f=0.0799  <S**2>=0.000
      68 -> 72        -0.12495
      69 -> 72         0.16550
      71 -> 72         0.67159
 
 Excited State   4:      Singlet-A      3.4740 eV  356.89 nm  f=0.1557  <S**2>=0.000
      68 -> 72         0.36083
      69 -> 72         0.58597
 
 Excited State   5:      Singlet-A      3.5600 eV  348.27 nm  f=0.1306  <S**2>=0.000
      66 -> 72         0.26706
      68 -> 72         0.52101
      69 -> 72        -0.33684
      71 -> 72         0.16708
 SavETr:  write IOETrn=   770 NScale= 10 NData=  16 NLR=1 NState=    5 LETran=      96.
 The selected state is a singlet
 CISAX will form     1 AO SS matrices at one time.
 NMat=     1 NSing=     1 JSym2X= 0.
 GePol: Maximum number of non-zero 1st derivatives   =     351
 CISAX will form     1 AO SS matrices at one time.
 NMat=     1 NSing=     1 JSym2X= 0.
 Leave Link  914 at Sun Jan 12 01:10:16 2020, MaxMem=   183500800 cpu:      2163.0
 (Enter E:\Gaussian\G09W\l1002.exe)
 Minotr:  Closed shell wavefunction.
          Computing CIS/TD-HF/TD-KS derivatives.
          Using Z-Vector for PSCF gradient.
          Skipping F1 and S1 gradient terms here.
          IDoAtm=111111111111111111111111
 NEqPCM:  Using equilibrium solvation (IEInf=0, Eps=  35.6880, EpsInf=   1.8069)
          Frozen-core window.
          Direct CPHF calculation.
          Differentiating once with respect to electric field.
                with respect to dipole field.
          Differentiating once with respect to nuclear coordinates.
          Requested convergence is 1.0D-10 RMS, and 1.0D-09 maximum.
          NewPWx=F KeepS1=T KeepF1=T KeepIn=T MapXYZ=F SortEE=F KeepMc=T.
          MDV=     183500466 using IRadAn=       0.
 Using stored XC quadrature information.
          Solving linear equations separately, MaxMat=       0.
          There are     1 degrees of freedom in the 1st order CPHF.  IDoFFX=0 NUNeed=     1.
 FoFJK:  IHMeth= 1 ICntrl=       0 DoSepK=F KAlg= 0 I1Cent=   0 FoldK=F
 IRaf= 800000000 NMat=   1 IRICut=       1 DoRegI=T DoRafI=F ISym2E=-1.
 FoFCou: FMM=F IPFlag=           0 FMFlag=      100000 FMFlg1=           0
         NFxFlg=           0 DoJE=F BraDBF=F KetDBF=F FulRan=T
         wScrn=  0.000000 ICntrl=       0 IOpCl=  0 I1Cent=           0 NGrid=           0
         NMat0=    1 NMatS0=      1 NMatT0=    0 NMatD0=    1 NMtDS0=    0 NMtDT0=    0
 Petite list used in FoFCou.
 LinEq1:  Iter=  0 NonCon=     1 RMS=1.05D-02 Max=5.79D-01 NDo=     1
 AX will form     1 AO Fock derivatives at one time.
 LinEq1:  Iter=  1 NonCon=     1 RMS=2.70D-03 Max=1.24D-01 NDo=     1
 LinEq1:  Iter=  2 NonCon=     1 RMS=2.53D-03 Max=8.64D-02 NDo=     1
 LinEq1:  Iter=  3 NonCon=     1 RMS=1.25D-03 Max=4.46D-02 NDo=     1
 LinEq1:  Iter=  4 NonCon=     1 RMS=8.43D-04 Max=3.58D-02 NDo=     1
 LinEq1:  Iter=  5 NonCon=     1 RMS=5.69D-04 Max=1.84D-02 NDo=     1
 LinEq1:  Iter=  6 NonCon=     1 RMS=3.56D-04 Max=1.47D-02 NDo=     1
 LinEq1:  Iter=  7 NonCon=     1 RMS=2.62D-04 Max=1.02D-02 NDo=     1
 LinEq1:  Iter=  8 NonCon=     1 RMS=1.32D-04 Max=5.09D-03 NDo=     1
 LinEq1:  Iter=  9 NonCon=     1 RMS=1.04D-04 Max=4.97D-03 NDo=     1
 LinEq1:  Iter= 10 NonCon=     1 RMS=3.31D-05 Max=8.37D-04 NDo=     1
 LinEq1:  Iter= 11 NonCon=     1 RMS=1.53D-05 Max=6.17D-04 NDo=     1
 LinEq1:  Iter= 12 NonCon=     1 RMS=8.45D-06 Max=3.06D-04 NDo=     1
 LinEq1:  Iter= 13 NonCon=     1 RMS=3.77D-06 Max=1.13D-04 NDo=     1
 LinEq1:  Iter= 14 NonCon=     1 RMS=2.09D-06 Max=6.70D-05 NDo=     1
 LinEq1:  Iter= 15 NonCon=     1 RMS=1.27D-06 Max=3.80D-05 NDo=     1
 LinEq1:  Iter= 16 NonCon=     1 RMS=3.42D-07 Max=8.14D-06 NDo=     1
 LinEq1:  Iter= 17 NonCon=     1 RMS=2.09D-07 Max=7.24D-06 NDo=     1
 LinEq1:  Iter= 18 NonCon=     1 RMS=9.99D-08 Max=2.81D-06 NDo=     1
 LinEq1:  Iter= 19 NonCon=     1 RMS=5.90D-08 Max=2.22D-06 NDo=     1
 LinEq1:  Iter= 20 NonCon=     1 RMS=3.23D-08 Max=1.03D-06 NDo=     1
 LinEq1:  Iter= 21 NonCon=     1 RMS=1.21D-08 Max=2.32D-07 NDo=     1
 LinEq1:  Iter= 22 NonCon=     1 RMS=6.31D-09 Max=1.85D-07 NDo=     1
 LinEq1:  Iter= 23 NonCon=     1 RMS=2.11D-09 Max=4.27D-08 NDo=     1
 LinEq1:  Iter= 24 NonCon=     1 RMS=1.26D-09 Max=3.98D-08 NDo=     1
 LinEq1:  Iter= 25 NonCon=     1 RMS=3.77D-10 Max=1.18D-08 NDo=     1
 LinEq1:  Iter= 26 NonCon=     1 RMS=2.25D-10 Max=9.21D-09 NDo=     1
 LinEq1:  Iter= 27 NonCon=     1 RMS=8.33D-11 Max=2.78D-09 NDo=     1
 LinEq1:  Iter= 28 NonCon=     0 RMS=1.96D-11 Max=6.06D-10 NDo=     1
 Linear equations converged to 1.000D-10 1.000D-09 after    28 iterations.
 End of Minotr F.D. properties file   721 does not exist.
 End of Minotr F.D. properties file   722 does not exist.
 End of Minotr F.D. properties file   788 does not exist.
 Leave Link 1002 at Sun Jan 12 01:43:51 2020, MaxMem=   183500800 cpu:      2014.0
 (Enter E:\Gaussian\G09W\l701.exe)
 Compute integral first derivatives.
 ... and contract with generalized density number  6.
 R6Disp: Adding Grimme-D3(BJ) dispersion energy 1st derivatives to the gradient.
 D1PCM: PCM CHGder 1st derivatives, ID1Alg=3 FixD1E=F DoIter=F DoCFld=F I1PDM=6.
 Leave Link  701 at Sun Jan 12 01:44:40 2020, MaxMem=   183500800 cpu:        48.0
 (Enter E:\Gaussian\G09W\l702.exe)
 L702 exits ... SP integral derivatives will be done elsewhere.
 Leave Link  702 at Sun Jan 12 01:44:40 2020, MaxMem=   183500800 cpu:         0.0
 (Enter E:\Gaussian\G09W\l703.exe)
 Compute integral first derivatives, UseDBF=F ICtDFT=           0.
 Integral derivatives from FoFJK, PRISM(SPDF).
 Calling FoFJK, ICntrl=  10005127 FMM=F ISym2X=0 I1Cent= 0 IOpClX= 0 NMat=1 NMatS=1 NMatT=0.
 FoFJK:  IHMeth= 1 ICntrl=10005127 DoSepK=F KAlg= 0 I1Cent=   0 FoldK=F
 IRaf=         0 NMat=   1 IRICut=       1 DoRegI=T DoRafI=F ISym2E= 0.
 FoFCou: FMM=F IPFlag=           0 FMFlag=      100000 FMFlg1=         800
         NFxFlg=           0 DoJE=F BraDBF=F KetDBF=F FulRan=T
         wScrn=  0.000000 ICntrl=10005127 IOpCl=  0 I1Cent=           0 NGrid=           0
         NMat0=    1 NMatS0=      1 NMatT0=    0 NMatD0=    1 NMtDS0=    0 NMtDT0=    0
 Symmetry not used in FoFCou.
 Leave Link  703 at Sun Jan 12 01:48:16 2020, MaxMem=   183500800 cpu:       215.0
 (Enter E:\Gaussian\G09W\l716.exe)
 Dipole        = 1.17793955D+00 1.21016262D+00-1.04098279D-04
 ***** Axes restored to original set *****
 -------------------------------------------------------------------
 Center     Atomic                   Forces (Hartrees/Bohr)
 Number     Number              X              Y              Z
 -------------------------------------------------------------------
      1        6           0.000022851    0.000036195   -0.000000170
      2        6          -0.000086160    0.000005058    0.000000346
      3        6           0.000034604    0.000237068   -0.000000292
      4        6          -0.000067227    0.000056139    0.000003103
      5        6          -0.000046226    0.000005773   -0.000000619
      6        6          -0.000025782   -0.000073166    0.000000177
      7        1          -0.000017975   -0.000011032   -0.000000105
      8        1          -0.000033431    0.000009583   -0.000000026
      9        1           0.000045093   -0.000026333   -0.000000024
     10        1          -0.000013215   -0.000005781    0.000000030
     11        6           0.000152969   -0.000773568   -0.000008675
     12        8          -0.000081502    0.000433060    0.000003676
     13        6           0.000220260   -0.000869331    0.000000090
     14        6           0.000071762    0.000093971    0.000003173
     15        6          -0.000174229    0.000204401   -0.000000448
     16        6           0.000038008    0.000052429   -0.000000470
     17        6           0.000105918    0.000039980    0.000000328
     18        6           0.000049101   -0.000053861    0.000000038
     19        1          -0.000012600   -0.000025291   -0.000000039
     20        6          -0.000069473    0.000063085   -0.000000028
     21        1           0.000004501    0.000031597   -0.000000041
     22        1           0.000019883    0.000012794   -0.000000078
     23       35          -0.000007821    0.000027896    0.000000018
     24        8          -0.000129310    0.000529334    0.000000037
 -------------------------------------------------------------------
 Cartesian Forces:  Max     0.000869331 RMS     0.000171790
 Leave Link  716 at Sun Jan 12 01:48:17 2020, MaxMem=   183500800 cpu:         0.0
 (Enter E:\Gaussian\G09W\l103.exe)

 GradGradGradGradGradGradGradGradGradGradGradGradGradGradGradGradGradGrad
 Berny optimization.
 Using GEDIIS/GDIIS optimizer.
 FormGI is forming the generalized inverse of G from B-inverse, IUseBI=4.
 Internal  Forces:  Max     0.000544667 RMS     0.000076016
 Search for a local minimum.
 Step number   3 out of a maximum of  142
 All quantities printed in internal units (Hartrees-Bohrs-Radians)
 RMS Force = .76016D-04 SwitMx=.10000D-02 MixMth= 2
 Mixed Optimization -- En-DIIS/RFO-DIIS
 Swapping is turned off.
 Update second derivatives using D2CorX and points    1    2    3
 DE= -3.77D-06 DEPred=-2.73D-06 R= 1.38D+00
 TightC=F SS=  1.41D+00  RLast= 4.00D-03 DXNew= 5.0454D-01 1.1988D-02
 Trust test= 1.38D+00 RLast= 4.00D-03 DXMaxT set to 3.00D-01
 ITU=  1  1  0
     Eigenvalues ---    0.01175   0.01288   0.01432   0.01618   0.01648
     Eigenvalues ---    0.01728   0.01756   0.01818   0.01841   0.02065
     Eigenvalues ---    0.02074   0.02079   0.02091   0.02140   0.02157
     Eigenvalues ---    0.02159   0.02181   0.02182   0.02206   0.02233
     Eigenvalues ---    0.02260   0.12635   0.16000   0.16000   0.16000
     Eigenvalues ---    0.16000   0.16008   0.16130   0.18210   0.19995
     Eigenvalues ---    0.22145   0.22471   0.22977   0.24246   0.24514
     Eigenvalues ---    0.24878   0.25000   0.25000   0.25000   0.25058
     Eigenvalues ---    0.25473   0.30192   0.34834   0.35458   0.35473
     Eigenvalues ---    0.35482   0.35496   0.35525   0.35652   0.35689
     Eigenvalues ---    0.37328   0.38706   0.39223   0.40296   0.41165
     Eigenvalues ---    0.41325   0.43392   0.44002   0.44269   0.45514
     Eigenvalues ---    0.47154   0.47560   0.48453   0.52085   0.65291
     Eigenvalues ---    0.81932
 En-DIIS/RFO-DIIS IScMMF=        0 using points:     3    2    1
 RFO step:  Lambda=-1.48977299D-06.
 NNeg= 0 NP= 3 Switch=  2.50D-03 Rises=F DC=  5.18D-05 SmlDif=  1.00D-05
 RMS Error=  0.1559112027D-03 NUsed= 3 EDIIS=F
 DidBck=F Rises=F RFO-DIIS coefs:    1.80335   -0.76379   -0.03955
 Iteration  1 RMS(Cart)=  0.00041407 RMS(Int)=  0.00000013
 Iteration  2 RMS(Cart)=  0.00000029 RMS(Int)=  0.00000002
 ITry= 1 IFail=0 DXMaxC= 2.02D-03 DCOld= 1.00D+10 DXMaxT= 3.00D-01 DXLimC= 3.00D+00 Rises=F
 Variable       Old X    -DE/DX   Delta X   Delta X   Delta X     New X
                                 (Linear)    (Quad)   (Total)
    R1        2.60741   0.00001   0.00002  -0.00007  -0.00006   2.60735
    R2        2.65698   0.00006  -0.00005   0.00021   0.00016   2.65715
    R3        2.04843   0.00002  -0.00001   0.00006   0.00005   2.04848
    R4        2.66888   0.00011   0.00034   0.00016   0.00050   2.66938
    R5        2.04796   0.00002  -0.00006   0.00012   0.00006   2.04802
    R6        2.66753   0.00010   0.00006   0.00030   0.00036   2.66790
    R7        2.73940  -0.00010  -0.00028  -0.00044  -0.00072   2.73868
    R8        2.65458   0.00005   0.00014  -0.00004   0.00010   2.65469
    R9        2.77264   0.00021   0.00079   0.00048   0.00127   2.77391
   R10        2.61282   0.00004   0.00005   0.00004   0.00009   2.61290
   R11        2.04758   0.00003  -0.00001   0.00013   0.00011   2.04769
   R12        2.04827   0.00001   0.00000   0.00002   0.00002   2.04829
   R13        2.34679  -0.00044  -0.00106  -0.00037  -0.00143   2.34536
   R14        2.77455   0.00023   0.00089   0.00047   0.00136   2.77590
   R15        2.73074  -0.00013  -0.00042  -0.00048  -0.00090   2.72984
   R16        2.40309   0.00054   0.00056   0.00092   0.00148   2.40457
   R17        2.66759   0.00010   0.00018   0.00023   0.00041   2.66800
   R18        2.65272   0.00003   0.00010  -0.00010   0.00000   2.65272
   R19        2.67054   0.00012   0.00035   0.00021   0.00056   2.67110
   R20        2.60690   0.00002   0.00013  -0.00010   0.00002   2.60692
   R21        2.04546   0.00003  -0.00007   0.00016   0.00009   2.04555
   R22        2.60288  -0.00002  -0.00004  -0.00013  -0.00017   2.60271
   R23        2.04790   0.00002  -0.00005   0.00012   0.00007   2.04797
   R24        2.65747   0.00006   0.00015   0.00008   0.00023   2.65770
   R25        3.61432  -0.00001   0.00074  -0.00075  -0.00001   3.61431
   R26        2.04509   0.00002  -0.00005   0.00010   0.00005   2.04514
    A1        2.09734   0.00003   0.00008   0.00013   0.00021   2.09755
    A2        2.09004  -0.00001   0.00019  -0.00018   0.00001   2.09006
    A3        2.09580  -0.00002  -0.00027   0.00004  -0.00022   2.09558
    A4        2.09626  -0.00001   0.00021  -0.00024  -0.00003   2.09623
    A5        2.10920  -0.00002   0.00001  -0.00020  -0.00020   2.10901
    A6        2.07772   0.00003  -0.00021   0.00044   0.00023   2.07795
    A7        2.09344  -0.00001  -0.00026   0.00016  -0.00010   2.09333
    A8        2.08851   0.00007   0.00043   0.00020   0.00063   2.08915
    A9        2.10124  -0.00006  -0.00017  -0.00036  -0.00053   2.10071
   A10        2.07307  -0.00002  -0.00010  -0.00003  -0.00013   2.07294
   A11        2.13304   0.00002   0.00025   0.00011   0.00036   2.13340
   A12        2.07707   0.00000  -0.00015  -0.00008  -0.00023   2.07684
   A13        2.11010   0.00002   0.00037  -0.00008   0.00029   2.11039
   A14        2.05463  -0.00004  -0.00115   0.00019  -0.00096   2.05367
   A15        2.11846   0.00002   0.00078  -0.00011   0.00067   2.11913
   A16        2.09616  -0.00001  -0.00030   0.00007  -0.00023   2.09593
   A17        2.09436  -0.00001  -0.00015  -0.00003  -0.00017   2.09419
   A18        2.09266   0.00002   0.00045  -0.00004   0.00041   2.09307
   A19        2.13371   0.00006   0.00031   0.00018   0.00049   2.13420
   A20        2.02141  -0.00011  -0.00064  -0.00029  -0.00093   2.02049
   A21        2.12807   0.00005   0.00033   0.00010   0.00043   2.12850
   A22        2.07499   0.00017   0.00053   0.00074   0.00127   2.07626
   A23        2.10389  -0.00010  -0.00031  -0.00044  -0.00075   2.10314
   A24        2.10431  -0.00007  -0.00022  -0.00030  -0.00052   2.10379
   A25        2.13282   0.00002   0.00027   0.00012   0.00038   2.13320
   A26        2.06963  -0.00001  -0.00017  -0.00009  -0.00026   2.06937
   A27        2.08074  -0.00002  -0.00010  -0.00003  -0.00013   2.08061
   A28        2.10287  -0.00005  -0.00023  -0.00033  -0.00056   2.10231
   A29        2.09133   0.00007   0.00043   0.00022   0.00064   2.09197
   A30        2.08898  -0.00002  -0.00020   0.00011  -0.00009   2.08890
   A31        2.09187   0.00002   0.00035  -0.00011   0.00023   2.09210
   A32        2.06219  -0.00003  -0.00082   0.00013  -0.00069   2.06150
   A33        2.12913   0.00001   0.00048  -0.00002   0.00046   2.12958
   A34        2.10573  -0.00001   0.00016  -0.00020  -0.00004   2.10569
   A35        2.08079   0.00002  -0.00029   0.00042   0.00012   2.08092
   A36        2.09666  -0.00001   0.00013  -0.00022  -0.00009   2.09658
   A37        2.12198   0.00000  -0.00031   0.00019  -0.00012   2.12185
   A38        2.08404   0.00002   0.00039  -0.00011   0.00028   2.08432
   A39        2.07717  -0.00002  -0.00008  -0.00008  -0.00016   2.07701
   A40        2.07708   0.00002   0.00010   0.00004   0.00014   2.07721
   A41        2.10234   0.00001   0.00053  -0.00019   0.00034   2.10268
   A42        2.10377  -0.00003  -0.00063   0.00015  -0.00048   2.10329
    D1        0.00000   0.00000   0.00000   0.00001   0.00001   0.00001
    D2       -3.14159   0.00000   0.00000   0.00001   0.00001  -3.14159
    D3        3.14159   0.00000   0.00000   0.00001   0.00001  -3.14159
    D4        0.00000   0.00000   0.00000   0.00000   0.00000   0.00000
    D5        0.00000   0.00000   0.00001  -0.00001  -0.00001  -0.00001
    D6        3.14159   0.00000   0.00000   0.00000   0.00000   3.14159
    D7       -3.14159   0.00000   0.00001  -0.00001  -0.00001   3.14159
    D8        0.00000   0.00000   0.00000   0.00000   0.00000   0.00000
    D9        0.00000   0.00000   0.00000  -0.00001  -0.00001   0.00000
   D10        3.14159   0.00000  -0.00001   0.00002   0.00001  -3.14158
   D11       -3.14159   0.00000   0.00000   0.00000   0.00000   3.14159
   D12        0.00000   0.00000  -0.00001   0.00003   0.00001   0.00001
   D13       -0.00001   0.00000   0.00000   0.00001   0.00001   0.00000
   D14       -3.14159   0.00000   0.00002  -0.00005  -0.00003   3.14157
   D15        3.14159   0.00000   0.00001  -0.00002  -0.00001   3.14158
   D16        0.00001   0.00000   0.00003  -0.00008  -0.00005  -0.00004
   D17        3.14159   0.00000  -0.00001  -0.00006  -0.00006   3.14153
   D18        0.00000   0.00000   0.00005  -0.00005   0.00000   0.00000
   D19       -0.00001   0.00000  -0.00002  -0.00003  -0.00004  -0.00005
   D20        3.14159   0.00000   0.00004  -0.00002   0.00002  -3.14158
   D21        0.00001   0.00000   0.00000  -0.00001  -0.00001   0.00000
   D22       -3.14159   0.00000   0.00001  -0.00001  -0.00001   3.14159
   D23        3.14159   0.00000  -0.00001   0.00004   0.00002  -3.14157
   D24       -0.00001   0.00000  -0.00001   0.00004   0.00002   0.00002
   D25       -3.14153   0.00000   0.00006  -0.00030  -0.00024   3.14141
   D26       -0.00001   0.00000  -0.00004   0.00017   0.00013   0.00012
   D27        0.00007   0.00000   0.00008  -0.00036  -0.00028  -0.00021
   D28        3.14159   0.00000  -0.00002   0.00012   0.00010  -3.14150
   D29        0.00000   0.00000  -0.00001   0.00001   0.00001   0.00000
   D30        3.14159   0.00000   0.00000   0.00000   0.00000   3.14159
   D31        3.14159   0.00000  -0.00001   0.00002   0.00001  -3.14159
   D32        0.00000   0.00000   0.00000   0.00001   0.00000   0.00000
   D33        0.00001   0.00000   0.00004  -0.00017  -0.00013  -0.00012
   D34       -3.14159   0.00000   0.00002  -0.00012  -0.00010   3.14150
   D35        3.14154   0.00000  -0.00006   0.00030   0.00024  -3.14141
   D36       -0.00007   0.00000  -0.00008   0.00036   0.00028   0.00021
   D37        0.00001   0.00000   0.00002   0.00003   0.00004   0.00005
   D38       -3.14159   0.00000   0.00001   0.00006   0.00007  -3.14153
   D39       -3.14159   0.00000  -0.00004   0.00002  -0.00002   3.14157
   D40        0.00000   0.00000  -0.00005   0.00005   0.00000   0.00000
   D41       -0.00001   0.00000  -0.00003   0.00008   0.00005   0.00004
   D42        3.14159   0.00000  -0.00002   0.00005   0.00003  -3.14157
   D43        3.14159   0.00000  -0.00001   0.00002   0.00001  -3.14158
   D44        0.00001   0.00000   0.00000  -0.00001  -0.00001   0.00000
   D45       -3.14159   0.00000   0.00002  -0.00004  -0.00003   3.14157
   D46        0.00001   0.00000   0.00001  -0.00004  -0.00002  -0.00002
   D47        0.00000   0.00000   0.00000   0.00001   0.00001   0.00000
   D48        3.14159   0.00000  -0.00001   0.00002   0.00001  -3.14159
   D49       -3.14159   0.00000   0.00001  -0.00003  -0.00001   3.14158
   D50        0.00001   0.00000   0.00001  -0.00003  -0.00002  -0.00001
   D51        0.00000   0.00000   0.00000   0.00001   0.00001   0.00000
   D52        3.14159   0.00000   0.00000   0.00000   0.00001  -3.14159
   D53        0.00000   0.00000   0.00000  -0.00001   0.00000   0.00000
   D54       -3.14159   0.00000   0.00000   0.00000   0.00000  -3.14159
   D55       -3.14159   0.00000   0.00001  -0.00002  -0.00001   3.14159
   D56        0.00000   0.00000   0.00001  -0.00001   0.00000   0.00000
   D57        0.00000   0.00000   0.00000   0.00000  -0.00001   0.00000
   D58       -3.14159   0.00000   0.00000  -0.00001  -0.00001   3.14159
   D59        3.14159   0.00000   0.00000   0.00000   0.00000   3.14159
   D60        0.00000   0.00000   0.00000   0.00000   0.00000   0.00000
   D61        0.00000   0.00000   0.00000   0.00001   0.00000   0.00000
   D62        3.14159   0.00000   0.00000   0.00001   0.00000  -3.14159
   D63       -3.14159   0.00000   0.00000   0.00000   0.00000   3.14159
   D64        0.00000   0.00000   0.00000   0.00000   0.00000   0.00000
         Item               Value     Threshold  Converged?
 Maximum Force            0.000545     0.000450     NO 
 RMS     Force            0.000076     0.000300     YES
 Maximum Displacement     0.002023     0.001800     NO 
 RMS     Displacement     0.000414     0.001200     YES
 Predicted change in Energy=-1.603762D-06
 Lowest energy point so far.  Saving SCF results.
 GradGradGradGradGradGradGradGradGradGradGradGradGradGradGradGradGradGrad

 Leave Link  103 at Sun Jan 12 01:48:17 2020, MaxMem=   183500800 cpu:         0.0
 (Enter E:\Gaussian\G09W\l202.exe)
                          Input orientation:                          
 ---------------------------------------------------------------------
 Center     Atomic      Atomic             Coordinates (Angstroms)
 Number     Number       Type             X           Y           Z
 ---------------------------------------------------------------------
      1          6           0       -3.692111    0.256367    0.000022
      2          6           0       -2.665321    1.178006    0.000041
      3          6           0       -1.321760    0.741875   -0.000025
      4          6           0       -1.029311   -0.639293   -0.000107
      5          6           0       -2.093921   -1.555843   -0.000122
      6          6           0       -3.406244   -1.120368   -0.000057
      7          1           0       -4.721072    0.597413    0.000069
      8          1           0       -2.873484    2.241595    0.000108
      9          1           0       -1.849073   -2.611410   -0.000190
     10          1           0       -4.215298   -1.841678   -0.000071
     11          6           0        0.347586   -1.148066   -0.000203
     12          8           0        0.605652   -2.362052   -0.000081
     13          6           0       -0.250138    1.717551    0.000012
     14          6           0        1.405057   -0.128481   -0.000053
     15          6           0        1.117992    1.253873    0.000028
     16          6           0        2.744002   -0.550101   -0.000019
     17          6           0        2.177992    2.188932    0.000145
     18          6           0        3.758610    0.384597    0.000095
     19          1           0        2.943796   -1.613960   -0.000089
     20          6           0        3.488348    1.764781    0.000176
     21          1           0        1.949180    3.248242    0.000211
     22          1           0        4.297786    2.483151    0.000263
     23         35           0        5.578386   -0.204043    0.000139
     24          8           0       -0.510694    2.963034    0.000105
 ---------------------------------------------------------------------
                    Distance matrix (angstroms):
                    1          2          3          4          5
     1  C    0.000000
     2  C    1.379753   0.000000
     3  C    2.419562   1.412574   0.000000
     4  C    2.809397   2.445221   1.411790   0.000000
     5  C    2.416261   2.792925   2.423992   1.404799   0.000000
     6  C    1.406101   2.414848   2.795178   2.425128   1.382689
     7  H    1.084008   2.136165   3.402380   3.893398   3.396828
     8  H    2.147389   1.083768   2.158011   3.420599   3.876630
     9  H    3.408949   3.876331   3.394493   2.135710   1.083593
    10  H    2.162295   3.394249   3.879086   3.405326   2.140547
    11  C    4.276866   3.806340   2.521625   1.467888   2.475326
    12  O    5.032582   4.819884   3.653667   2.375079   2.817387
    13  C    3.739283   2.474715   1.449247   2.482302   3.756946
    14  C    5.111676   4.274914   2.862351   2.487383   3.778917
    15  C    4.912444   3.784073   2.492896   2.862689   4.267422
    16  C    6.486443   5.678656   4.266101   3.774366   4.941358
    17  C    6.180042   4.947692   3.787116   4.276172   5.680897
    18  C    7.451824   6.472742   5.092917   4.896175   6.165827
    19  H    6.894446   6.265562   4.872877   4.090911   5.038052
    20  C    7.337186   6.181581   4.917670   5.117501   6.495250
    21  H    6.385568   5.057617   4.120792   4.897380   6.279005
    22  H    8.294397   7.084367   5.883141   6.174756   7.560912
    23  Br   9.281923   8.358754   6.964680   6.622016   7.790485
    24  O    4.177016   2.797989   2.364610   3.639468   4.788200
                    6          7          8          9         10
     6  C    0.000000
     7  H    2.163226   0.000000
     8  H    3.403914   2.473240   0.000000
     9  H    2.155919   4.306383   4.959948   0.000000
    10  H    1.083909   2.490979   4.298091   2.488274   0.000000
    11  C    3.753932   5.360783   4.676013   2.639448   4.615302
    12  O    4.199653   6.093638   5.770439   2.467358   4.848953
    13  C    4.244383   4.609117   2.675176   4.614813   5.328284
    14  C    4.912480   6.168986   4.891133   4.093202   5.875665
    15  C    5.109376   5.875850   4.111870   4.872770   6.166557
    16  C    6.176627   7.552756   6.272935   5.034415   7.078137
    17  C    6.491160   7.080256   5.051751   6.265824   7.557777
    18  C    7.321205   8.482352   6.887170   6.357843   8.278859
    19  H    6.369194   7.977492   6.978973   4.895559   7.162715
    20  C    7.473920   8.292004   6.379676   6.902110   8.506040
    21  H    6.911245   7.177685   4.926604   6.982997   7.994253
    22  H    8.505141   9.213892   7.175337   7.983635   9.548652
    23  Br   9.031235  10.330594   8.798594   7.807853   9.929657
    24  O    5.005835   4.829436   2.470476   5.732861   6.067072
                   11         12         13         14         15
    11  C    0.000000
    12  O    1.241113   0.000000
    13  C    2.927291   4.168398   0.000000
    14  C    1.468945   2.372318   2.479416   0.000000
    15  C    2.522467   3.652042   1.444568   1.411846   0.000000
    16  C    2.469893   2.802804   3.755944   1.403758   2.428628
    17  C    3.806041   4.814947   2.473463   2.442915   1.413484
    18  C    3.739537   4.181534   4.224550   2.408829   2.780019
    19  H    2.637682   2.454905   4.615212   2.138777   3.399710
    20  C    4.283581   5.033954   3.738784   2.815056   2.424792
    21  H    4.678956   5.768923   2.679555   3.420281   2.160643
    22  H    5.365615   6.091622   4.611915   3.897243   3.409137
    23  Br   5.315303   5.420801   6.137118   4.174013   4.692615
    24  O    4.199737   5.440844   1.272446   3.636972   2.360900
                   16         17         18         19         20
    16  C    0.000000
    17  C    2.796904   0.000000
    18  C    1.379525   2.398745   0.000000
    19  H    1.082458   3.879233   2.158275   0.000000
    20  C    2.431611   1.377293   1.406396   3.422343   0.000000
    21  H    3.880612   1.083740   3.387403   4.962889   2.137684
    22  H    3.408058   2.140114   2.166712   4.315045   1.082241
    23  Br   2.855431   4.158005   1.912611   2.988131   2.871329
    24  O    4.789067   2.797904   4.987514   5.734316   4.174703
                   21         22         23         24
    21  H    0.000000
    22  H    2.470084   0.000000
    23  Br   5.008932   2.976734   0.000000
    24  O    2.476353   4.832367   6.863474   0.000000
 Stoichiometry    C14H7BrO2
 Framework group  C1[X(C14H7BrO2)]
 Deg. of freedom    66
 Full point group                 C1      NOp   1
 RotChk:  IX=0 Diff= 1.49D-04
 Largest Abelian subgroup         C1      NOp   1
 Largest concise Abelian subgroup C1      NOp   1
                         Standard orientation:                         
 ---------------------------------------------------------------------
 Center     Atomic      Atomic             Coordinates (Angstroms)
 Number     Number       Type             X           Y           Z
 ---------------------------------------------------------------------
      1          6           0        5.065510    0.070160    0.000013
      2          6           0        4.038987    0.992097   -0.000006
      3          6           0        2.695300    0.556355    0.000059
      4          6           0        2.402449   -0.824727    0.000142
      5          6           0        3.466794   -1.741586    0.000157
      6          6           0        4.779243   -1.306492    0.000092
      7          1           0        6.094570    0.410908   -0.000034
      8          1           0        4.247459    2.055626   -0.000073
      9          1           0        3.221640   -2.797083    0.000224
     10          1           0        5.588088   -2.028037    0.000106
     11          6           0        1.025405   -1.333101    0.000238
     12          8           0        0.766987   -2.547012    0.000116
     13          6           0        1.623961    1.532342    0.000023
     14          6           0       -0.031770   -0.313209    0.000088
     15          6           0        0.255697    1.069062    0.000007
     16          6           0       -1.370837   -0.734440    0.000054
     17          6           0       -0.804033    2.004428   -0.000110
     18          6           0       -2.385174    0.200552   -0.000060
     19          1           0       -1.570940   -1.798242    0.000124
     20          6           0       -2.114511    1.580658   -0.000142
     21          1           0       -0.574913    3.063671   -0.000176
     22          1           0       -2.923741    2.299262   -0.000228
     23         35           0       -4.205120   -0.387560   -0.000104
     24          8           0        1.884878    2.777750   -0.000070
 ---------------------------------------------------------------------
 Rotational constants (GHZ):      1.0041511      0.1781054      0.1512740
 Leave Link  202 at Sun Jan 12 01:48:17 2020, MaxMem=   183500800 cpu:         0.0
 (Enter E:\Gaussian\G09W\l301.exe)
 Standard basis: 6-311G(d) (5D, 7F)
 Ernie: Thresh=  0.10000D-02 Tol=  0.10000D-05 Strict=F.
 There are   372 symmetry adapted cartesian basis functions of A   symmetry.
 There are   353 symmetry adapted basis functions of A   symmetry.
   353 basis functions,   637 primitive gaussians,   372 cartesian basis functions
    71 alpha electrons       71 beta electrons
       nuclear repulsion energy      1374.2188900034 Hartrees.
 IExCor=  402 DFT=T Ex+Corr=B3LYP ExCW=0 ScaHFX=  0.200000
 ScaDFX=  0.800000  0.720000  1.000000  0.810000 ScalE2=  1.000000  1.000000
 IRadAn=      0 IRanWt=     -1 IRanGd=            0 ICorTp=0 IEmpDi=141
 NAtoms=   24 NActive=   24 NUniq=   24 SFac= 1.00D+00 NAtFMM=   60 NAOKFM=F Big=F
 Integral buffers will be    262144 words long.
 Regular integral format.
 Two-electron integral symmetry is turned on.
 R6Disp:  Grimme-D3(BJ) Dispersion energy=       -0.0620447377 Hartrees.
 Nuclear repulsion after empirical dispersion term =     1374.1568452656 Hartrees.
 ------------------------------------------------------------------------------
 Polarizable Continuum Model (PCM)
 =================================
 Model                : PCM (using non-symmetric T matrix).
 Atomic radii         : UFF (Universal Force Field).
 Polarization charges : Total charges.
 Charge compensation  : None.
 Solution method      : On-the-fly selection.
 Cavity type          : Scaled VdW (van der Waals Surface) (Alpha=1.100).
 Cavity algorithm     : GePol (No added spheres)
                        Default sphere list used, NSphG=   24.
                        Lebedev-Laikov grids with approx.  5.0 points / Ang**2.
                        Smoothing algorithm: Karplus/York (Gamma=1.0000).
                        Polarization charges: spherical gaussians, with
                                              point-specific exponents (IZeta= 3).
                        Self-potential: point-specific (ISelfS= 7).
                        Self-field    : sphere-specific E.n sum rule (ISelfD= 2).
 1st derivatives      : Analytical E(r).r(x)/FMM algorithm (CHGder, D1EAlg=3).
                        Cavity 1st derivative terms included.
 Solvent              : Acetonitrile, Eps=  35.688000 Eps(inf)=   1.806874
 ------------------------------------------------------------------------------
 GePol: Number of generator spheres                  =      24
 GePol: Total number of spheres                      =      24
 GePol: Number of exposed spheres                    =      24 (100.00%)
 GePol: Number of points                             =    2164
 GePol: Average weight of points                     =       0.13
 GePol: Minimum weight of points                     =   0.10D-08
 GePol: Maximum weight of points                     =    0.20577
 GePol: Number of points with low weight             =     113
 GePol: Fraction of low-weight points (<1% of avg)   =       5.22%
 GePol: Cavity surface area                          =    279.243 Ang**2
 GePol: Cavity volume                                =    305.150 Ang**3
 Leave Link  301 at Sun Jan 12 01:48:18 2020, MaxMem=   183500800 cpu:         0.0
 (Enter E:\Gaussian\G09W\l302.exe)
 NPDir=0 NMtPBC=     1 NCelOv=     1 NCel=       1 NClECP=     1 NCelD=      1
         NCelK=      1 NCelE2=     1 NClLst=     1 CellRange=     0.0.
 One-electron integrals computed using PRISM.
 NBasis=   353 RedAO= T EigKep=  9.44D-05  NBF=   353
 NBsUse=   353 1.00D-06 EigRej= -1.00D+00 NBFU=   353
 Precomputing XC quadrature grid using
 IXCGrd= 4 IRadAn=           0 IRanWt=          -1 IRanGd=           0 AccXCQ= 0.00D+00.
 Generated NRdTot=       0 NPtTot=           0 NUsed=           0 NTot=          16
 NSgBfM=   363   363   363   363   363 MxSgAt=    24 MxSgA2=    24.
 Leave Link  302 at Sun Jan 12 01:48:20 2020, MaxMem=   183500800 cpu:         2.0
 (Enter E:\Gaussian\G09W\l308.exe)
 Leave Link  308 at Sun Jan 12 01:48:21 2020, MaxMem=   183500800 cpu:         0.0
 (Enter E:\Gaussian\G09W\l303.exe)
 DipDrv:  MaxL=1.
 Leave Link  303 at Sun Jan 12 01:48:22 2020, MaxMem=   183500800 cpu:         1.0
 (Enter E:\Gaussian\G09W\l401.exe)
 Initial guess from the checkpoint file:  "E:\Gaussian file\2-BrAQ excited singlet opt.chk"
 B after Tr=     0.000000    0.000000    0.000000
         Rot=    1.000000   -0.000006    0.000005   -0.000021 Ang=   0.00 deg.
 Guess basis will be translated and rotated to current coordinates.
 JPrj=2 DoOrth=T DoCkMO=T.
 Leave Link  401 at Sun Jan 12 01:48:23 2020, MaxMem=   183500800 cpu:         1.0
 (Enter E:\Gaussian\G09W\l502.exe)
 Closed shell SCF:
 Using DIIS extrapolation, IDIIS=  1040.
 Integral symmetry usage will be decided dynamically.
 IVT=      438130 IEndB=      438130 NGot=   183500800 MDV=   183218067
 LenX=   183218067 LenY=   183079242
 Requested convergence on RMS density matrix=1.00D-08 within 128 cycles.
 Requested convergence on MAX density matrix=1.00D-06.
 Requested convergence on             energy=1.00D-06.
 No special actions if energy rises.
 Fock matrices will be formed incrementally for  20 cycles.

 Cycle   1  Pass 1  IDiag  1:
 FoFJK:  IHMeth= 1 ICntrl=       0 DoSepK=F KAlg= 0 I1Cent=   0 FoldK=F
 IRaf= 780000000 NMat=   1 IRICut=       1 DoRegI=T DoRafI=F ISym2E= 0.
 FoFCou: FMM=F IPFlag=           0 FMFlag=      100000 FMFlg1=           0
         NFxFlg=           0 DoJE=F BraDBF=F KetDBF=F FulRan=T
         wScrn=  0.000000 ICntrl=       0 IOpCl=  0 I1Cent=           0 NGrid=           0
         NMat0=    1 NMatS0=      1 NMatT0=    0 NMatD0=    1 NMtDS0=    0 NMtDT0=    0
 Symmetry not used in FoFCou.
 Inv3:  Mode=1 IEnd=    14048688.
 Iteration    1 A*A^-1 deviation from unit magnitude is 2.33D-15 for    523.
 Iteration    1 A*A^-1 deviation from orthogonality  is 3.59D-15 for   1451   1262.
 Iteration    1 A^-1*A deviation from unit magnitude is 2.22D-15 for   1109.
 Iteration    1 A^-1*A deviation from orthogonality  is 3.92D-14 for   1704   1678.
 E= -3262.53736196606    
 DIIS: error= 1.04D-04 at cycle   1 NSaved=   1.
 NSaved= 1 IEnMin= 1 EnMin= -3262.53736196606     IErMin= 1 ErrMin= 1.04D-04
 ErrMax= 1.04D-04  0.00D+00 EMaxC= 1.00D-01 BMatC= 2.12D-06 BMatP= 2.12D-06
 IDIUse=3 WtCom= 9.99D-01 WtEn= 1.04D-03
 Coeff-Com:  0.100D+01
 Coeff-En:   0.100D+01
 Coeff:      0.100D+01
 Gap=     0.813 Goal=   None    Shift=    0.000
 RMSDP=1.44D-05 MaxDP=6.00D-04              OVMax= 4.95D-04

 Cycle   2  Pass 1  IDiag  1:
 RMSU=  1.44D-05    CP:  1.00D+00
 E= -3262.53736332018     Delta-E=       -0.000001354117 Rises=F Damp=F
 DIIS: error= 1.07D-04 at cycle   2 NSaved=   2.
 NSaved= 2 IEnMin= 2 EnMin= -3262.53736332018     IErMin= 1 ErrMin= 1.04D-04
 ErrMax= 1.07D-04  0.00D+00 EMaxC= 1.00D-01 BMatC= 1.43D-06 BMatP= 2.12D-06
 IDIUse=3 WtCom= 9.99D-01 WtEn= 1.07D-03
 Coeff-Com:  0.430D+00 0.570D+00
 Coeff-En:   0.000D+00 0.100D+01
 Coeff:      0.430D+00 0.570D+00
 Gap=     0.138 Goal=   None    Shift=    0.000
 RMSDP=8.35D-06 MaxDP=3.06D-04 DE=-1.35D-06 OVMax= 4.35D-04

 Cycle   3  Pass 1  IDiag  1:
 RMSU=  6.32D-06    CP:  1.00D+00  6.21D-01
 E= -3262.53736353979     Delta-E=       -0.000000219610 Rises=F Damp=F
 DIIS: error= 1.00D-04 at cycle   3 NSaved=   3.
 NSaved= 3 IEnMin= 3 EnMin= -3262.53736353979     IErMin= 3 ErrMin= 1.00D-04
 ErrMax= 1.00D-04  0.00D+00 EMaxC= 1.00D-01 BMatC= 1.08D-06 BMatP= 1.43D-06
 IDIUse=3 WtCom= 9.99D-01 WtEn= 1.00D-03
 Coeff-Com:  0.167D-02 0.464D+00 0.535D+00
 Coeff-En:   0.000D+00 0.456D+00 0.544D+00
 Coeff:      0.167D-02 0.464D+00 0.535D+00
 Gap=     0.138 Goal=   None    Shift=    0.000
 RMSDP=5.29D-06 MaxDP=1.87D-04 DE=-2.20D-07 OVMax= 2.07D-04

 Cycle   4  Pass 1  IDiag  1:
 RMSU=  8.08D-07    CP:  1.00D+00  8.80D-01  4.20D-01
 E= -3262.53736432800     Delta-E=       -0.000000788216 Rises=F Damp=F
 DIIS: error= 7.21D-06 at cycle   4 NSaved=   4.
 NSaved= 4 IEnMin= 4 EnMin= -3262.53736432800     IErMin= 4 ErrMin= 7.21D-06
 ErrMax= 7.21D-06  0.00D+00 EMaxC= 1.00D-01 BMatC= 1.02D-08 BMatP= 1.08D-06
 IDIUse=1 WtCom= 1.00D+00 WtEn= 0.00D+00
 Coeff-Com: -0.894D-02 0.161D+00 0.221D+00 0.627D+00
 Coeff:     -0.894D-02 0.161D+00 0.221D+00 0.627D+00
 Gap=     0.138 Goal=   None    Shift=    0.000
 RMSDP=4.86D-07 MaxDP=2.19D-05 DE=-7.88D-07 OVMax= 3.17D-05

 Cycle   5  Pass 1  IDiag  1:
 RMSU=  3.41D-07    CP:  1.00D+00  8.71D-01  4.62D-01  8.05D-01
 E= -3262.53736433410     Delta-E=       -0.000000006102 Rises=F Damp=F
 DIIS: error= 4.22D-06 at cycle   5 NSaved=   5.
 NSaved= 5 IEnMin= 5 EnMin= -3262.53736433410     IErMin= 5 ErrMin= 4.22D-06
 ErrMax= 4.22D-06  0.00D+00 EMaxC= 1.00D-01 BMatC= 2.90D-09 BMatP= 1.02D-08
 IDIUse=1 WtCom= 1.00D+00 WtEn= 0.00D+00
 Coeff-Com: -0.533D-02 0.551D-01 0.905D-01 0.394D+00 0.466D+00
 Coeff:     -0.533D-02 0.551D-01 0.905D-01 0.394D+00 0.466D+00
 Gap=     0.138 Goal=   None    Shift=    0.000
 RMSDP=2.77D-07 MaxDP=1.05D-05 DE=-6.10D-09 OVMax= 1.56D-05

 Cycle   6  Pass 1  IDiag  1:
 RMSU=  1.35D-07    CP:  1.00D+00  8.67D-01  4.56D-01  8.03D-01  3.62D-01
 E= -3262.53736433627     Delta-E=       -0.000000002166 Rises=F Damp=F
 DIIS: error= 1.63D-06 at cycle   6 NSaved=   6.
 NSaved= 6 IEnMin= 6 EnMin= -3262.53736433627     IErMin= 6 ErrMin= 1.63D-06
 ErrMax= 1.63D-06  0.00D+00 EMaxC= 1.00D-01 BMatC= 3.84D-10 BMatP= 2.90D-09
 IDIUse=1 WtCom= 1.00D+00 WtEn= 0.00D+00
 Coeff-Com: -0.235D-02 0.177D-01 0.355D-01 0.195D+00 0.306D+00 0.448D+00
 Coeff:     -0.235D-02 0.177D-01 0.355D-01 0.195D+00 0.306D+00 0.448D+00
 Gap=     0.138 Goal=   None    Shift=    0.000
 RMSDP=1.02D-07 MaxDP=3.97D-06 DE=-2.17D-09 OVMax= 6.12D-06

 Cycle   7  Pass 1  IDiag  1:
 RMSU=  3.42D-08    CP:  1.00D+00  8.67D-01  4.62D-01  8.12D-01  5.57D-01
                    CP:  6.21D-01
 E= -3262.53736433659     Delta-E=       -0.000000000320 Rises=F Damp=F
 DIIS: error= 3.03D-07 at cycle   7 NSaved=   7.
 NSaved= 7 IEnMin= 7 EnMin= -3262.53736433659     IErMin= 7 ErrMin= 3.03D-07
 ErrMax= 3.03D-07  0.00D+00 EMaxC= 1.00D-01 BMatC= 2.02D-11 BMatP= 3.84D-10
 IDIUse=1 WtCom= 1.00D+00 WtEn= 0.00D+00
 Coeff-Com: -0.213D-03-0.683D-03 0.220D-02 0.319D-01 0.707D-01 0.224D+00
 Coeff-Com:  0.672D+00
 Coeff:     -0.213D-03-0.683D-03 0.220D-02 0.319D-01 0.707D-01 0.224D+00
 Coeff:      0.672D+00
 Gap=     0.138 Goal=   None    Shift=    0.000
 RMSDP=2.06D-08 MaxDP=8.44D-07 DE=-3.20D-10 OVMax= 1.94D-06

 Cycle   8  Pass 1  IDiag  1:
 RMSU=  1.04D-08    CP:  1.00D+00  8.67D-01  4.62D-01  8.16D-01  5.25D-01
                    CP:  6.75D-01  7.11D-01
 E= -3262.53736433655     Delta-E=        0.000000000038 Rises=F Damp=F
 DIIS: error= 1.61D-07 at cycle   8 NSaved=   8.
 NSaved= 8 IEnMin= 7 EnMin= -3262.53736433659     IErMin= 8 ErrMin= 1.61D-07
 ErrMax= 1.61D-07  0.00D+00 EMaxC= 1.00D-01 BMatC= 4.08D-12 BMatP= 2.02D-11
 IDIUse=1 WtCom= 1.00D+00 WtEn= 0.00D+00
 Coeff-Com:  0.118D-04-0.182D-02-0.189D-02 0.203D-02 0.133D-01 0.945D-01
 Coeff-Com:  0.417D+00 0.477D+00
 Coeff:      0.118D-04-0.182D-02-0.189D-02 0.203D-02 0.133D-01 0.945D-01
 Coeff:      0.417D+00 0.477D+00
 Gap=     0.138 Goal=   None    Shift=    0.000
 RMSDP=8.54D-09 MaxDP=2.53D-07 DE= 3.82D-11 OVMax= 5.93D-07

 Error on total polarization charges =  0.01381
 SCF Done:  E(RB3LYP) =  -3262.53736434     A.U. after    8 cycles
            NFock=  8  Conv=0.85D-08     -V/T= 2.0018
 KE= 3.256747763517D+03 PE=-1.050457916686D+04 EE= 2.611137193742D+03
 Leave Link  502 at Sun Jan 12 01:56:08 2020, MaxMem=   183500800 cpu:       465.0
 (Enter E:\Gaussian\G09W\l801.exe)
 DoSCS=F DFT=T ScalE2(SS,OS)=  1.000000  1.000000
 ExpMin= 1.03D-01 ExpMax= 4.40D+05 ExpMxC= 1.51D+04 IAcc=3 IRadAn=         5 AccDes= 0.00D+00
 HarFok:  IExCor=  205 AccDes= 0.00D+00 IRadAn=         5 IDoV=-2 UseB2=F ITyADJ=14
 ICtDFT= 12500011 ScaDFX=  1.000000  1.000000  1.000000  1.000000
 Largest valence mixing into a core orbital is  2.27D-04
 Largest core mixing into a valence orbital is  2.00D-05
 Range of M.O.s used for correlation:    31   353
 NBasis=   353 NAE=    71 NBE=    71 NFC=    30 NFV=     0
 NROrb=    323 NOA=    41 NOB=    41 NVA=   282 NVB=   282

 **** Warning!!: The largest alpha MO coefficient is  0.24464671D+02

 Leave Link  801 at Sun Jan 12 01:56:10 2020, MaxMem=   183500800 cpu:         1.0
 (Enter E:\Gaussian\G09W\l914.exe)
 RHF ground state
 MDV=   183500800 DFT=T DoStab=F Mixed=T DoRPA=T DoScal=F NonHer=T
 NEqPCM:  Using equilibrium solvation (IEInf=0, Eps=  35.6880, EpsInf=   1.8069)
 Making orbital integer symmetry assigments:
 Orbital symmetries:
       Occupied  (A) (A) (A) (A) (A) (A) (A) (A) (A) (A) (A) (A)
                 (A) (A) (A) (A) (A) (A) (A) (A) (A) (A) (A) (A)
                 (A) (A) (A) (A) (A) (A) (A) (A) (A) (A) (A) (A)
                 (A) (A) (A) (A) (A) (A) (A) (A) (A) (A) (A) (A)
                 (A) (A) (A) (A) (A) (A) (A) (A) (A) (A) (A) (A)
                 (A) (A) (A) (A) (A) (A) (A) (A) (A) (A) (A)
       Virtual   (A) (A) (A) (A) (A) (A) (A) (A) (A) (A) (A) (A)
                 (A) (A) (A) (A) (A) (A) (A) (A) (A) (A) (A) (A)
                 (A) (A) (A) (A) (A) (A) (A) (A) (A) (A) (A) (A)
                 (A) (A) (A) (A) (A) (A) (A) (A) (A) (A) (A) (A)
                 (A) (A) (A) (A) (A) (A) (A) (A) (A) (A) (A) (A)
                 (A) (A) (A) (A) (A) (A) (A) (A) (A) (A) (A) (A)
                 (A) (A) (A) (A) (A) (A) (A) (A) (A) (A) (A) (A)
                 (A) (A) (A) (A) (A) (A) (A) (A) (A) (A) (A) (A)
                 (A) (A) (A) (A) (A) (A) (A) (A) (A) (A) (A) (A)
                 (A) (A) (A) (A) (A) (A) (A) (A) (A) (A) (A) (A)
                 (A) (A) (A) (A) (A) (A) (A) (A) (A) (A) (A) (A)
                 (A) (A) (A) (A) (A) (A) (A) (A) (A) (A) (A) (A)
                 (A) (A) (A) (A) (A) (A) (A) (A) (A) (A) (A) (A)
                 (A) (A) (A) (A) (A) (A) (A) (A) (A) (A) (A) (A)
                 (A) (A) (A) (A) (A) (A) (A) (A) (A) (A) (A) (A)
                 (A) (A) (A) (A) (A) (A) (A) (A) (A) (A) (A) (A)
                 (A) (A) (A) (A) (A) (A) (A) (A) (A) (A) (A) (A)
                 (A) (A) (A) (A) (A) (A) (A) (A) (A) (A) (A) (A)
                 (A) (A) (A) (A) (A) (A) (A) (A) (A) (A) (A) (A)
                 (A) (A) (A) (A) (A) (A) (A) (A) (A) (A) (A) (A)
                 (A) (A) (A) (A) (A) (A) (A) (A) (A) (A) (A) (A)
                 (A) (A) (A) (A) (A) (A) (A) (A) (A) (A) (A) (A)
                 (A) (A) (A) (A) (A) (A) (A) (A) (A) (A) (A) (A)
                 (A) (A) (A) (A) (A) (A)
 Generating guess from densities on rwf.
 Convergence on wavefunction:    0.000001000000000
 Davidson Disk Diagonalization:  ConvIn= 1.00D-06 SkipCon=T Conv= 1.00D-06.
 Max sub-space:   200 roots to seek:     5 dimension of matrix:        23124
 Iteration     1 Dimension    10 NMult     0 NNew     10
 CISAX will form    10 AO SS matrices at one time.
 NMat=    10 NSing=    10 JSym2X= 0.
 FoFJK:  IHMeth= 1 ICntrl=       0 DoSepK=F KAlg= 0 I1Cent=   0 FoldK=F
 IRaf=         0 NMat=  20 IRICut=       1 DoRegI=T DoRafI=F ISym2E= 0.
 FoFCou: FMM=F IPFlag=           0 FMFlag=      100000 FMFlg1=           0
         NFxFlg=           0 DoJE=F BraDBF=F KetDBF=F FulRan=T
         wScrn=  0.000000 ICntrl=       0 IOpCl=  0 I1Cent=           0 NGrid=           0
         NMat0=   20 NMatS0=     10 NMatT0=    0 NMatD0=   20 NMtDS0=    0 NMtDT0=    0
 Symmetry not used in FoFCou.
 Excitation Energies [eV] at current iteration:
 Root      1 :     2.765781795044617
 Root      2 :     3.043848355064005
 Root      3 :     3.107791718164882
 Root      4 :     3.473400765425504
 Root      5 :     3.559695584223223
 Iteration     2 Dimension    20 NMult    10 NNew     10
 CISAX will form    10 AO SS matrices at one time.
 NMat=    10 NSing=    10 JSym2X= 0.
 Root      1 not converged, maximum delta is    0.000682574801195
 Root      2 not converged, maximum delta is    0.000868490936512
 Root      3 not converged, maximum delta is    0.000804973245799
 Root      4 not converged, maximum delta is    0.000645192424776
 Root      5 not converged, maximum delta is    0.000620953778199
 Excitation Energies [eV] at current iteration:
 Root      1 :     2.765767716006237   Change is   -0.000014079038380
 Root      2 :     3.043829184937954   Change is   -0.000019170126051
 Root      3 :     3.107786543370038   Change is   -0.000005174794844
 Root      4 :     3.473395266022477   Change is   -0.000005499403026
 Root      5 :     3.559689488717126   Change is   -0.000006095506096
 Iteration     3 Dimension    30 NMult    20 NNew     10
 CISAX will form    10 AO SS matrices at one time.
 NMat=    10 NSing=    10 JSym2X= 0.
 Root      1 not converged, maximum delta is    0.000123850513652
 Root      2 not converged, maximum delta is    0.000131480782192
 Root      3 not converged, maximum delta is    0.000134073240486
 Root      4 not converged, maximum delta is    0.000102247806592
 Root      5 not converged, maximum delta is    0.000134571431975
 Excitation Energies [eV] at current iteration:
 Root      1 :     2.765767515771006   Change is   -0.000000200235231
 Root      2 :     3.043828813258954   Change is   -0.000000371679001
 Root      3 :     3.107786210574607   Change is   -0.000000332795431
 Root      4 :     3.473394591092118   Change is   -0.000000674930360
 Root      5 :     3.559688855815302   Change is   -0.000000632901824
 Iteration     4 Dimension    40 NMult    30 NNew     10
 CISAX will form    10 AO SS matrices at one time.
 NMat=    10 NSing=    10 JSym2X= 0.
 Root      1 not converged, maximum delta is    0.000015398562851
 Root      2 not converged, maximum delta is    0.000016577465508
 Root      3 not converged, maximum delta is    0.000027302318049
 Root      4 not converged, maximum delta is    0.000108503788750
 Root      5 not converged, maximum delta is    0.000161108894997
 Excitation Energies [eV] at current iteration:
 Root      1 :     2.765767510810915   Change is   -0.000000004960091
 Root      2 :     3.043828803937059   Change is   -0.000000009321894
 Root      3 :     3.107786175854332   Change is   -0.000000034720275
 Root      4 :     3.473394485809775   Change is   -0.000000105282343
 Root      5 :     3.559688700574811   Change is   -0.000000155240491
 Iteration     5 Dimension    50 NMult    40 NNew     10
 CISAX will form    10 AO SS matrices at one time.
 NMat=    10 NSing=    10 JSym2X= 0.
 Root      1 not converged, maximum delta is    0.000001252725634
 Root      2 not converged, maximum delta is    0.000002398476024
 Root      3 not converged, maximum delta is    0.000004314936302
 Root      4 not converged, maximum delta is    0.000019672331433
 Root      5 not converged, maximum delta is    0.000024629715631
 Excitation Energies [eV] at current iteration:
 Root      1 :     2.765767510525899   Change is   -0.000000000285016
 Root      2 :     3.043828802828708   Change is   -0.000000001108351
 Root      3 :     3.107786171917702   Change is   -0.000000003936630
 Root      4 :     3.473394466779963   Change is   -0.000000019029812
 Root      5 :     3.559688678701821   Change is   -0.000000021872990
 Iteration     6 Dimension    60 NMult    50 NNew     10
 CISAX will form    10 AO SS matrices at one time.
 NMat=    10 NSing=    10 JSym2X= 0.
 Root      1 has converged.
 Root      2 has converged.
 Root      3 has converged.
 Root      4 not converged, maximum delta is    0.000002895607402
 Root      5 not converged, maximum delta is    0.000004246594965
 Excitation Energies [eV] at current iteration:
 Root      1 :     2.765767510500872   Change is   -0.000000000025027
 Root      2 :     3.043828802732020   Change is   -0.000000000096689
 Root      3 :     3.107786171693124   Change is   -0.000000000224578
 Root      4 :     3.473394465552836   Change is   -0.000000001227126
 Root      5 :     3.559688676830998   Change is   -0.000000001870823
 Iteration     7 Dimension    64 NMult    60 NNew      4
 CISAX will form     4 AO SS matrices at one time.
 NMat=     4 NSing=     4 JSym2X= 0.
 Root      1 has converged.
 Root      2 has converged.
 Root      3 has converged.
 Root      4 has converged.
 Root      5 not converged, maximum delta is    0.000001034681049
 Excitation Energies [eV] at current iteration:
 Root      1 :     2.765767510500991   Change is    0.000000000000119
 Root      2 :     3.043828802731155   Change is   -0.000000000000864
 Root      3 :     3.107786171679051   Change is   -0.000000000014073
 Root      4 :     3.473394465436225   Change is   -0.000000000116611
 Root      5 :     3.559688676670772   Change is   -0.000000000160226
 Iteration     8 Dimension    66 NMult    64 NNew      2
 CISAX will form     2 AO SS matrices at one time.
 NMat=     2 NSing=     2 JSym2X= 0.
 Root      1 has converged.
 Root      2 has converged.
 Root      3 has converged.
 Root      4 has converged.
 Root      5 has converged.
 Excitation Energies [eV] at current iteration:
 Root      1 :     2.765767510501110   Change is    0.000000000000119
 Root      2 :     3.043828802731210   Change is    0.000000000000054
 Root      3 :     3.107786171679898   Change is    0.000000000000847
 Root      4 :     3.473394465433101   Change is   -0.000000000003125
 Root      5 :     3.559688676657470   Change is   -0.000000000013303
 Convergence achieved on expansion vectors.
 ***********************************************************************
 Excited states from <AA,BB:AA,BB> singles matrix:
 ***********************************************************************
 
 1PDM for each excited state written to RWF  633
 Ground to excited state transition densities written to RWF  633
 Ground to excited state transition electric dipole moments (Au):
       state          X           Y           Z        Dip. S.      Osc.
         1        -0.0001      0.0000      0.0021      0.0000      0.0000
         2        -0.0003     -0.0001     -0.0012      0.0000      0.0000
         3         1.0180      0.1585      0.0000      1.0615      0.0808
         4         1.3131     -0.3160      0.0000      1.8241      0.1552
         5         1.1481      0.4252      0.0000      1.4989      0.1307
 Ground to excited state transition velocity dipole moments (Au):
       state          X           Y           Z        Dip. S.      Osc.
         1         0.0000      0.0000     -0.0003      0.0000      0.0000
         2         0.0000      0.0000      0.0003      0.0000      0.0000
         3        -0.1151     -0.0168      0.0000      0.0135      0.0789
         4        -0.1708      0.0405      0.0000      0.0308      0.1609
         5        -0.1500     -0.0516      0.0000      0.0252      0.1283
 Ground to excited state transition magnetic dipole moments (Au):
       state          X           Y           Z
         1        -0.1644     -0.7569      0.0001
         2         0.0564      0.2710     -0.0007
         3         0.0000      0.0002      1.2175
         4         0.0000     -0.0001     -0.0240
         5         0.0000     -0.0002     -0.8099
 Ground to excited state transition velocity quadrupole moments (Au):
       state          XX          YY          ZZ          XY          XZ          YZ
         1         0.0001      0.0000      0.0000      0.0000      0.0180     -0.0043
         2        -0.0003      0.0001      0.0000     -0.0001     -0.0087      0.0015
         3         0.2709     -0.2168      0.0131      0.2491      0.0000      0.0000
         4        -1.5506      0.2112     -0.0181      0.2215      0.0000      0.0000
         5         0.2180     -0.1491      0.0241     -0.4527      0.0000      0.0000
 <0|del|b> * <b|rxdel|0> + <0|del|b> * <b|delr+rdel|0>
 Rotatory Strengths (R) in cgs (10**-40 erg-esu-cm/Gauss)
       state          XX          YY          ZZ    R(velocity)    E-M Angle
         1         0.0039     -0.0051     -0.0011     -0.0008       90.00
         2         0.0085      0.0053      0.0142      0.0093       90.00
         3        -0.0222     -0.0216     -0.0172     -0.0204       90.00
         4        -0.0139      0.0152     -0.0075     -0.0021       90.00
         5         0.0341      0.0075      0.0172      0.0196       90.00
 1/2[<0|r|b>*<b|rxdel|0> + (<0|rxdel|b>*<b|r|0>)*]
 Rotatory Strengths (R) in cgs (10**-40 erg-esu-cm/Gauss)
       state          XX          YY          ZZ     R(length)
         1        -0.0098      0.0073     -0.0001     -0.0009
         2         0.0116      0.0187     -0.0006      0.0099
         3        -0.0211     -0.0270     -0.0154     -0.0212
         4         0.0214     -0.0281      0.0001     -0.0022
         5         0.0054      0.0458      0.0093      0.0202
  1/2[<0|del|b>*<b|r|0> + (<0|r|b>*<b|del|0>)*] (Au)
       state          X           Y           Z        Dip. S.   Osc.(frdel)
         1         0.0000      0.0000      0.0000      0.0000      0.0000
         2         0.0000      0.0000      0.0000      0.0000      0.0000
         3        -0.1171     -0.0027      0.0000      0.1198      0.0799
         4        -0.2243     -0.0128      0.0000      0.2370      0.1580
         5        -0.1723     -0.0219      0.0000      0.1942      0.1295

 Excitation energies and oscillator strengths:
 
 Excited State   1:      Singlet-A      2.7658 eV  448.28 nm  f=0.0000  <S**2>=0.000
      70 -> 72         0.69309
 This state for optimization and/or second-order correction.
 Total Energy, E(TD-HF/TD-KS) =  -3262.43572425    
 Copying the excited state density for this state as the 1-particle RhoCI density.
 
 Excited State   2:      Singlet-A      3.0438 eV  407.33 nm  f=0.0000  <S**2>=0.000
      67 -> 72         0.68727
      70 -> 73         0.11127
 
 Excited State   3:      Singlet-A      3.1078 eV  398.95 nm  f=0.0808  <S**2>=0.000
      68 -> 72        -0.12470
      69 -> 72         0.16702
      71 -> 72         0.67127
 
 Excited State   4:      Singlet-A      3.4734 eV  356.95 nm  f=0.1552  <S**2>=0.000
      68 -> 72         0.36302
      69 -> 72         0.58481
 
 Excited State   5:      Singlet-A      3.5597 eV  348.30 nm  f=0.1307  <S**2>=0.000
      66 -> 72         0.26747
      68 -> 72         0.52000
      69 -> 72        -0.33770
      71 -> 72         0.16780
 SavETr:  write IOETrn=   770 NScale= 10 NData=  16 NLR=1 NState=    5 LETran=      96.
 The selected state is a singlet
 CISAX will form     1 AO SS matrices at one time.
 NMat=     1 NSing=     1 JSym2X= 0.
 GePol: Maximum number of non-zero 1st derivatives   =     349
 CISAX will form     1 AO SS matrices at one time.
 NMat=     1 NSing=     1 JSym2X= 0.
 Leave Link  914 at Sun Jan 12 02:32:09 2020, MaxMem=   183500800 cpu:      2159.0
 (Enter E:\Gaussian\G09W\l1002.exe)
 Minotr:  Closed shell wavefunction.
          Computing CIS/TD-HF/TD-KS derivatives.
          Using Z-Vector for PSCF gradient.
          Skipping F1 and S1 gradient terms here.
          IDoAtm=111111111111111111111111
 NEqPCM:  Using equilibrium solvation (IEInf=0, Eps=  35.6880, EpsInf=   1.8069)
          Frozen-core window.
          Direct CPHF calculation.
          Differentiating once with respect to electric field.
                with respect to dipole field.
          Differentiating once with respect to nuclear coordinates.
          Requested convergence is 1.0D-10 RMS, and 1.0D-09 maximum.
          NewPWx=F KeepS1=T KeepF1=T KeepIn=T MapXYZ=F SortEE=F KeepMc=T.
          MDV=     183500466 using IRadAn=       0.
 Using stored XC quadrature information.
          Solving linear equations separately, MaxMat=       0.
          There are     1 degrees of freedom in the 1st order CPHF.  IDoFFX=0 NUNeed=     1.
 FoFJK:  IHMeth= 1 ICntrl=       0 DoSepK=F KAlg= 0 I1Cent=   0 FoldK=F
 IRaf= 800000000 NMat=   1 IRICut=       1 DoRegI=T DoRafI=F ISym2E=-1.
 FoFCou: FMM=F IPFlag=           0 FMFlag=      100000 FMFlg1=           0
         NFxFlg=           0 DoJE=F BraDBF=F KetDBF=F FulRan=T
         wScrn=  0.000000 ICntrl=       0 IOpCl=  0 I1Cent=           0 NGrid=           0
         NMat0=    1 NMatS0=      1 NMatT0=    0 NMatD0=    1 NMtDS0=    0 NMtDT0=    0
 Petite list used in FoFCou.
 LinEq1:  Iter=  0 NonCon=     1 RMS=1.06D-02 Max=5.89D-01 NDo=     1
 AX will form     1 AO Fock derivatives at one time.
 LinEq1:  Iter=  1 NonCon=     1 RMS=2.73D-03 Max=1.25D-01 NDo=     1
 LinEq1:  Iter=  2 NonCon=     1 RMS=2.55D-03 Max=8.60D-02 NDo=     1
 LinEq1:  Iter=  3 NonCon=     1 RMS=1.27D-03 Max=4.56D-02 NDo=     1
 LinEq1:  Iter=  4 NonCon=     1 RMS=8.56D-04 Max=3.65D-02 NDo=     1
 LinEq1:  Iter=  5 NonCon=     1 RMS=5.77D-04 Max=1.88D-02 NDo=     1
 LinEq1:  Iter=  6 NonCon=     1 RMS=3.59D-04 Max=1.49D-02 NDo=     1
 LinEq1:  Iter=  7 NonCon=     1 RMS=2.64D-04 Max=1.02D-02 NDo=     1
 LinEq1:  Iter=  8 NonCon=     1 RMS=1.33D-04 Max=5.10D-03 NDo=     1
 LinEq1:  Iter=  9 NonCon=     1 RMS=1.05D-04 Max=5.08D-03 NDo=     1
 LinEq1:  Iter= 10 NonCon=     1 RMS=3.32D-05 Max=8.44D-04 NDo=     1
 LinEq1:  Iter= 11 NonCon=     1 RMS=1.54D-05 Max=6.27D-04 NDo=     1
 LinEq1:  Iter= 12 NonCon=     1 RMS=8.49D-06 Max=3.05D-04 NDo=     1
 LinEq1:  Iter= 13 NonCon=     1 RMS=3.74D-06 Max=1.10D-04 NDo=     1
 LinEq1:  Iter= 14 NonCon=     1 RMS=2.09D-06 Max=6.64D-05 NDo=     1
 LinEq1:  Iter= 15 NonCon=     1 RMS=1.27D-06 Max=3.81D-05 NDo=     1
 LinEq1:  Iter= 16 NonCon=     1 RMS=3.44D-07 Max=8.13D-06 NDo=     1
 LinEq1:  Iter= 17 NonCon=     1 RMS=2.08D-07 Max=7.27D-06 NDo=     1
 LinEq1:  Iter= 18 NonCon=     1 RMS=9.89D-08 Max=2.77D-06 NDo=     1
 LinEq1:  Iter= 19 NonCon=     1 RMS=5.86D-08 Max=2.25D-06 NDo=     1
 LinEq1:  Iter= 20 NonCon=     1 RMS=3.23D-08 Max=1.05D-06 NDo=     1
 LinEq1:  Iter= 21 NonCon=     1 RMS=1.25D-08 Max=2.36D-07 NDo=     1
 LinEq1:  Iter= 22 NonCon=     1 RMS=6.50D-09 Max=1.89D-07 NDo=     1
 LinEq1:  Iter= 23 NonCon=     1 RMS=2.17D-09 Max=4.47D-08 NDo=     1
 LinEq1:  Iter= 24 NonCon=     1 RMS=1.28D-09 Max=3.94D-08 NDo=     1
 LinEq1:  Iter= 25 NonCon=     1 RMS=3.88D-10 Max=1.20D-08 NDo=     1
 LinEq1:  Iter= 26 NonCon=     1 RMS=2.41D-10 Max=9.84D-09 NDo=     1
 LinEq1:  Iter= 27 NonCon=     1 RMS=8.49D-11 Max=2.78D-09 NDo=     1
 LinEq1:  Iter= 28 NonCon=     0 RMS=2.03D-11 Max=6.06D-10 NDo=     1
 Linear equations converged to 1.000D-10 1.000D-09 after    28 iterations.
 End of Minotr F.D. properties file   721 does not exist.
 End of Minotr F.D. properties file   722 does not exist.
 End of Minotr F.D. properties file   788 does not exist.
 Leave Link 1002 at Sun Jan 12 03:04:27 2020, MaxMem=   183500800 cpu:      1938.0
 (Enter E:\Gaussian\G09W\l701.exe)
 Compute integral first derivatives.
 ... and contract with generalized density number  6.
 R6Disp: Adding Grimme-D3(BJ) dispersion energy 1st derivatives to the gradient.
 D1PCM: PCM CHGder 1st derivatives, ID1Alg=3 FixD1E=F DoIter=F DoCFld=F I1PDM=6.
 Leave Link  701 at Sun Jan 12 03:05:14 2020, MaxMem=   183500800 cpu:        47.0
 (Enter E:\Gaussian\G09W\l702.exe)
 L702 exits ... SP integral derivatives will be done elsewhere.
 Leave Link  702 at Sun Jan 12 03:05:15 2020, MaxMem=   183500800 cpu:         0.0
 (Enter E:\Gaussian\G09W\l703.exe)
 Compute integral first derivatives, UseDBF=F ICtDFT=           0.
 Integral derivatives from FoFJK, PRISM(SPDF).
 Calling FoFJK, ICntrl=  10005127 FMM=F ISym2X=0 I1Cent= 0 IOpClX= 0 NMat=1 NMatS=1 NMatT=0.
 FoFJK:  IHMeth= 1 ICntrl=10005127 DoSepK=F KAlg= 0 I1Cent=   0 FoldK=F
 IRaf=         0 NMat=   1 IRICut=       1 DoRegI=T DoRafI=F ISym2E= 0.
 FoFCou: FMM=F IPFlag=           0 FMFlag=      100000 FMFlg1=         800
         NFxFlg=           0 DoJE=F BraDBF=F KetDBF=F FulRan=T
         wScrn=  0.000000 ICntrl=10005127 IOpCl=  0 I1Cent=           0 NGrid=           0
         NMat0=    1 NMatS0=      1 NMatT0=    0 NMatD0=    1 NMtDS0=    0 NMtDT0=    0
 Symmetry not used in FoFCou.
 Leave Link  703 at Sun Jan 12 03:08:48 2020, MaxMem=   183500800 cpu:       213.0
 (Enter E:\Gaussian\G09W\l716.exe)
 Dipole        = 1.18140097D+00 1.22806874D+00 1.71426414D-05
 ***** Axes restored to original set *****
 -------------------------------------------------------------------
 Center     Atomic                   Forces (Hartrees/Bohr)
 Number     Number              X              Y              Z
 -------------------------------------------------------------------
      1        6           0.000003592   -0.000021342    0.000000237
      2        6           0.000039453    0.000010389   -0.000000583
      3        6          -0.000049096    0.000162225   -0.000001499
      4        6          -0.000002136   -0.000110247   -0.000011346
      5        6           0.000144730    0.000037418    0.000000880
      6        6          -0.000007718    0.000007573   -0.000000207
      7        1           0.000003035   -0.000004079    0.000000302
      8        1          -0.000036615   -0.000014397   -0.000000185
      9        1          -0.000046496   -0.000009139   -0.000000083
     10        1           0.000013478   -0.000014684   -0.000000001
     11        6          -0.000028001    0.000121271    0.000035038
     12        8           0.000017087   -0.000035950   -0.000014092
     13        6           0.000137620   -0.000653698    0.000006121
     14        6           0.000044335   -0.000076415   -0.000011524
     15        6          -0.000039921    0.000144181   -0.000001205
     16        6          -0.000110482    0.000009316    0.000000681
     17        6          -0.000050394    0.000021809   -0.000000498
     18        6           0.000024214    0.000031347   -0.000000062
     19        1           0.000036666    0.000013756   -0.000000010
     20        6           0.000012879   -0.000047061    0.000000164
     21        1           0.000025982    0.000011995   -0.000000135
     22        1          -0.000023727    0.000035531    0.000000276
     23       35          -0.000022266    0.000016632    0.000000031
     24        8          -0.000086220    0.000363569   -0.000002300
 -------------------------------------------------------------------
 Cartesian Forces:  Max     0.000653698 RMS     0.000100608
 Leave Link  716 at Sun Jan 12 03:08:48 2020, MaxMem=   183500800 cpu:         0.0
 (Enter E:\Gaussian\G09W\l103.exe)

 GradGradGradGradGradGradGradGradGradGradGradGradGradGradGradGradGradGrad
 Berny optimization.
 Using GEDIIS/GDIIS optimizer.
 FormGI is forming the generalized inverse of G from B-inverse, IUseBI=4.
 Internal  Forces:  Max     0.000373593 RMS     0.000042774
 Search for a local minimum.
 Step number   4 out of a maximum of  142
 All quantities printed in internal units (Hartrees-Bohrs-Radians)
 RMS Force = .42774D-04 SwitMx=.10000D-02 MixMth= 2
 Mixed Optimization -- En-DIIS/RFO-DIIS
 Swapping is turned off.
 Update second derivatives using D2CorX and points    1    2    3    4
 DE= -1.84D-06 DEPred=-1.60D-06 R= 1.15D+00
 TightC=F SS=  1.41D+00  RLast= 4.37D-03 DXNew= 5.0454D-01 1.3122D-02
 Trust test= 1.15D+00 RLast= 4.37D-03 DXMaxT set to 3.00D-01
 ITU=  1  1  1  0
     Eigenvalues ---    0.01180   0.01290   0.01432   0.01618   0.01648
     Eigenvalues ---    0.01728   0.01756   0.01818   0.01841   0.02065
     Eigenvalues ---    0.02074   0.02079   0.02091   0.02140   0.02157
     Eigenvalues ---    0.02159   0.02181   0.02182   0.02206   0.02233
     Eigenvalues ---    0.02260   0.10534   0.16000   0.16000   0.16000
     Eigenvalues ---    0.16001   0.16021   0.16440   0.17601   0.18842
     Eigenvalues ---    0.22086   0.22477   0.22989   0.24178   0.24521
     Eigenvalues ---    0.24856   0.25000   0.25000   0.25001   0.25210
     Eigenvalues ---    0.26280   0.29964   0.34835   0.35458   0.35473
     Eigenvalues ---    0.35482   0.35500   0.35551   0.35653   0.35790
     Eigenvalues ---    0.37327   0.39093   0.39215   0.40492   0.41181
     Eigenvalues ---    0.41308   0.43411   0.44010   0.44367   0.46556
     Eigenvalues ---    0.47337   0.47581   0.48548   0.52019   0.60549
     Eigenvalues ---    0.90668
 En-DIIS/RFO-DIIS IScMMF=        0 using points:     4    3    2    1
 RFO step:  Lambda=-4.01662860D-07.
 NNeg= 0 NP= 4 Switch=  2.50D-03 Rises=F DC=  5.18D-05 SmlDif=  1.00D-05
 RMS Error=  0.7900101601D-04 NUsed= 4 EDIIS=F
 DidBck=F Rises=F RFO-DIIS coefs:    1.41910   -0.58122    0.16216   -0.00003
 Iteration  1 RMS(Cart)=  0.00028646 RMS(Int)=  0.00000010
 Iteration  2 RMS(Cart)=  0.00000019 RMS(Int)=  0.00000005
 ITry= 1 IFail=0 DXMaxC= 1.52D-03 DCOld= 1.00D+10 DXMaxT= 3.00D-01 DXLimC= 3.00D+00 Rises=F
 Variable       Old X    -DE/DX   Delta X   Delta X   Delta X     New X
                                 (Linear)    (Quad)   (Total)
    R1        2.60735  -0.00002  -0.00005   0.00000  -0.00005   2.60730
    R2        2.65715  -0.00001   0.00007  -0.00008  -0.00001   2.65713
    R3        2.04848   0.00000   0.00001  -0.00001   0.00000   2.04848
    R4        2.66938  -0.00002   0.00012   0.00000   0.00012   2.66950
    R5        2.04802   0.00000   0.00003  -0.00004  -0.00001   2.04801
    R6        2.66790   0.00003   0.00012   0.00007   0.00019   2.66809
    R7        2.73868  -0.00012  -0.00028  -0.00036  -0.00064   2.73804
    R8        2.65469  -0.00008  -0.00002  -0.00017  -0.00019   2.65449
    R9        2.77391  -0.00004   0.00034  -0.00003   0.00031   2.77421
   R10        2.61290   0.00001   0.00001   0.00006   0.00006   2.61297
   R11        2.04769  -0.00001   0.00004  -0.00006  -0.00002   2.04768
   R12        2.04829   0.00000   0.00000  -0.00001  -0.00001   2.04828
   R13        2.34536   0.00004  -0.00042  -0.00008  -0.00050   2.34487
   R14        2.77590  -0.00004   0.00036   0.00000   0.00036   2.77627
   R15        2.72984  -0.00012  -0.00033  -0.00038  -0.00071   2.72913
   R16        2.40457   0.00037   0.00051   0.00058   0.00109   2.40566
   R17        2.66800   0.00002   0.00012   0.00005   0.00017   2.66817
   R18        2.65272  -0.00007  -0.00006  -0.00013  -0.00019   2.65253
   R19        2.67110  -0.00001   0.00015   0.00002   0.00016   2.67126
   R20        2.60692   0.00001  -0.00003   0.00011   0.00008   2.60700
   R21        2.04555   0.00000   0.00004  -0.00005  -0.00001   2.04554
   R22        2.60271  -0.00001  -0.00009   0.00003  -0.00006   2.60265
   R23        2.04797   0.00000   0.00003  -0.00004  -0.00001   2.04796
   R24        2.65770  -0.00002   0.00006  -0.00003   0.00003   2.65773
   R25        3.61431  -0.00002  -0.00019   0.00023   0.00004   3.61436
   R26        2.04514   0.00000   0.00002  -0.00002   0.00000   2.04514
    A1        2.09755   0.00000   0.00007  -0.00002   0.00006   2.09760
    A2        2.09006  -0.00001  -0.00003   0.00001  -0.00002   2.09004
    A3        2.09558   0.00001  -0.00004   0.00000  -0.00004   2.09554
    A4        2.09623  -0.00003  -0.00006  -0.00004  -0.00010   2.09613
    A5        2.10901  -0.00002  -0.00007  -0.00016  -0.00023   2.10877
    A6        2.07795   0.00005   0.00014   0.00020   0.00033   2.07828
    A7        2.09333   0.00003   0.00001   0.00006   0.00007   2.09341
    A8        2.08915   0.00003   0.00018   0.00025   0.00042   2.08957
    A9        2.10071  -0.00006  -0.00019  -0.00031  -0.00050   2.10021
   A10        2.07294  -0.00001  -0.00003  -0.00008  -0.00011   2.07283
   A11        2.13340  -0.00001   0.00012  -0.00004   0.00008   2.13348
   A12        2.07684   0.00002  -0.00009   0.00012   0.00003   2.07687
   A13        2.11039  -0.00001   0.00004   0.00005   0.00009   2.11048
   A14        2.05367   0.00006  -0.00020   0.00019  -0.00001   2.05367
   A15        2.11913  -0.00005   0.00016  -0.00024  -0.00009   2.11904
   A16        2.09593   0.00002  -0.00004   0.00002  -0.00002   2.09591
   A17        2.09419   0.00000  -0.00004  -0.00002  -0.00006   2.09413
   A18        2.09307  -0.00002   0.00008   0.00000   0.00008   2.09314
   A19        2.13420  -0.00001   0.00016  -0.00005   0.00010   2.13431
   A20        2.02049   0.00003  -0.00028   0.00011  -0.00018   2.02031
   A21        2.12850  -0.00002   0.00012  -0.00005   0.00007   2.12857
   A22        2.07626   0.00012   0.00042   0.00058   0.00100   2.07727
   A23        2.10314  -0.00006  -0.00025  -0.00030  -0.00055   2.10258
   A24        2.10379  -0.00006  -0.00017  -0.00028  -0.00045   2.10333
   A25        2.13320  -0.00002   0.00012  -0.00006   0.00007   2.13327
   A26        2.06937   0.00002  -0.00010   0.00011   0.00001   2.06938
   A27        2.08061   0.00000  -0.00003  -0.00005  -0.00007   2.08054
   A28        2.10231  -0.00005  -0.00019  -0.00029  -0.00048   2.10184
   A29        2.09197   0.00003   0.00018   0.00025   0.00043   2.09240
   A30        2.08890   0.00002   0.00001   0.00004   0.00005   2.08894
   A31        2.09210   0.00000   0.00002   0.00010   0.00012   2.09222
   A32        2.06150   0.00003  -0.00014   0.00007  -0.00007   2.06143
   A33        2.12958  -0.00003   0.00012  -0.00017  -0.00005   2.12954
   A34        2.10569  -0.00003  -0.00006  -0.00005  -0.00011   2.10558
   A35        2.08092   0.00005   0.00011   0.00020   0.00031   2.08123
   A36        2.09658  -0.00002  -0.00005  -0.00015  -0.00020   2.09638
   A37        2.12185   0.00001   0.00002  -0.00010  -0.00008   2.12177
   A38        2.08432  -0.00001   0.00004   0.00006   0.00010   2.08441
   A39        2.07701   0.00001  -0.00006   0.00004  -0.00001   2.07700
   A40        2.07721   0.00001   0.00003   0.00007   0.00010   2.07732
   A41        2.10268  -0.00003   0.00005  -0.00012  -0.00007   2.10261
   A42        2.10329   0.00003  -0.00008   0.00005  -0.00003   2.10326
    D1        0.00001   0.00000   0.00000  -0.00002  -0.00002  -0.00001
    D2       -3.14159   0.00000   0.00000  -0.00003  -0.00003   3.14157
    D3       -3.14159   0.00000   0.00000  -0.00001  -0.00001   3.14159
    D4        0.00000   0.00000   0.00000  -0.00002  -0.00002  -0.00001
    D5       -0.00001   0.00000   0.00000   0.00002   0.00002   0.00001
    D6        3.14159   0.00000   0.00000   0.00001   0.00000  -3.14159
    D7        3.14159   0.00000   0.00000   0.00001   0.00001  -3.14159
    D8        0.00000   0.00000   0.00000  -0.00001  -0.00001  -0.00001
    D9        0.00000   0.00000   0.00000   0.00001   0.00000   0.00000
   D10       -3.14158   0.00000   0.00001  -0.00006  -0.00005   3.14155
   D11        3.14159   0.00000   0.00000   0.00001   0.00001  -3.14159
   D12        0.00001   0.00000   0.00001  -0.00006  -0.00005  -0.00004
   D13        0.00000   0.00000   0.00000   0.00001   0.00001   0.00001
   D14        3.14157   0.00000  -0.00001   0.00010   0.00009  -3.14152
   D15        3.14158   0.00000  -0.00001   0.00008   0.00007  -3.14154
   D16       -0.00004   0.00000  -0.00003   0.00017   0.00015   0.00011
   D17        3.14153   0.00000  -0.00003   0.00032   0.00029  -3.14137
   D18        0.00000   0.00000  -0.00001  -0.00006  -0.00007  -0.00007
   D19       -0.00005   0.00000  -0.00001   0.00025   0.00023   0.00018
   D20       -3.14158   0.00000   0.00000  -0.00013  -0.00013   3.14148
   D21        0.00000   0.00000   0.00000  -0.00001  -0.00001  -0.00001
   D22        3.14159   0.00000   0.00000   0.00002   0.00001  -3.14159
   D23       -3.14157   0.00000   0.00001  -0.00010  -0.00009   3.14153
   D24        0.00002   0.00000   0.00001  -0.00008  -0.00007  -0.00005
   D25        3.14141   0.00001  -0.00012   0.00087   0.00076  -3.14102
   D26        0.00012   0.00000   0.00006  -0.00057  -0.00051  -0.00039
   D27       -0.00021   0.00001  -0.00013   0.00097   0.00084   0.00063
   D28       -3.14150   0.00000   0.00004  -0.00047  -0.00043   3.14126
   D29        0.00000   0.00000   0.00000  -0.00001   0.00000   0.00000
   D30        3.14159   0.00000   0.00000   0.00001   0.00001  -3.14158
   D31       -3.14159   0.00000   0.00001  -0.00003  -0.00003   3.14157
   D32        0.00000   0.00000   0.00000  -0.00001  -0.00001  -0.00001
   D33       -0.00012   0.00001  -0.00006   0.00057   0.00051   0.00039
   D34        3.14150   0.00000  -0.00004   0.00047   0.00043  -3.14126
   D35       -3.14141  -0.00001   0.00011  -0.00086  -0.00075   3.14103
   D36        0.00021  -0.00001   0.00013  -0.00097  -0.00083  -0.00063
   D37        0.00005   0.00000   0.00001  -0.00024  -0.00023  -0.00018
   D38       -3.14153   0.00000   0.00003  -0.00032  -0.00029   3.14137
   D39        3.14157   0.00000   0.00000   0.00013   0.00013  -3.14148
   D40        0.00000   0.00000   0.00001   0.00006   0.00007   0.00007
   D41        0.00004   0.00000   0.00003  -0.00018  -0.00016  -0.00012
   D42       -3.14157   0.00000   0.00002  -0.00011  -0.00010   3.14152
   D43       -3.14158   0.00000   0.00001  -0.00008  -0.00007   3.14153
   D44        0.00000   0.00000   0.00000  -0.00001  -0.00001  -0.00001
   D45        3.14157   0.00000  -0.00002   0.00011   0.00009  -3.14152
   D46       -0.00002   0.00000  -0.00001   0.00008   0.00007   0.00005
   D47        0.00000   0.00000   0.00000   0.00001   0.00001   0.00001
   D48       -3.14159   0.00000   0.00001  -0.00002  -0.00001   3.14158
   D49        3.14158   0.00000  -0.00001   0.00007   0.00006  -3.14155
   D50       -0.00001   0.00000  -0.00001   0.00006   0.00005   0.00004
   D51        0.00000   0.00000   0.00000  -0.00001   0.00000   0.00000
   D52       -3.14159   0.00000   0.00000  -0.00001  -0.00001   3.14159
   D53        0.00000   0.00000   0.00000   0.00000   0.00000   0.00000
   D54       -3.14159   0.00000   0.00000  -0.00001  -0.00001   3.14158
   D55        3.14159   0.00000  -0.00001   0.00003   0.00003  -3.14157
   D56        0.00000   0.00000   0.00000   0.00002   0.00001   0.00001
   D57        0.00000   0.00000   0.00000   0.00002   0.00002   0.00001
   D58        3.14159   0.00000   0.00000   0.00001   0.00001  -3.14159
   D59        3.14159   0.00000   0.00000   0.00003   0.00002  -3.14157
   D60        0.00000   0.00000   0.00000   0.00002   0.00002   0.00001
   D61        0.00000   0.00000   0.00000  -0.00002  -0.00002  -0.00001
   D62       -3.14159   0.00000   0.00000  -0.00001  -0.00001   3.14159
   D63        3.14159   0.00000   0.00000   0.00000   0.00000   3.14159
   D64        0.00000   0.00000   0.00000   0.00001   0.00001   0.00001
         Item               Value     Threshold  Converged?
 Maximum Force            0.000374     0.000450     YES
 RMS     Force            0.000043     0.000300     YES
 Maximum Displacement     0.001519     0.001800     YES
 RMS     Displacement     0.000286     0.001200     YES
 Predicted change in Energy=-4.061622D-07
 Optimization completed.
    -- Stationary point found.
                           ----------------------------
                           !   Optimized Parameters   !
                           ! (Angstroms and Degrees)  !
 --------------------------                            --------------------------
 ! Name  Definition              Value          Derivative Info.                !
 --------------------------------------------------------------------------------
 ! R1    R(1,2)                  1.3798         -DE/DX =    0.0                 !
 ! R2    R(1,6)                  1.4061         -DE/DX =    0.0                 !
 ! R3    R(1,7)                  1.084          -DE/DX =    0.0                 !
 ! R4    R(2,3)                  1.4126         -DE/DX =    0.0                 !
 ! R5    R(2,8)                  1.0838         -DE/DX =    0.0                 !
 ! R6    R(3,4)                  1.4118         -DE/DX =    0.0                 !
 ! R7    R(3,13)                 1.4492         -DE/DX =   -0.0001              !
 ! R8    R(4,5)                  1.4048         -DE/DX =   -0.0001              !
 ! R9    R(4,11)                 1.4679         -DE/DX =    0.0                 !
 ! R10   R(5,6)                  1.3827         -DE/DX =    0.0                 !
 ! R11   R(5,9)                  1.0836         -DE/DX =    0.0                 !
 ! R12   R(6,10)                 1.0839         -DE/DX =    0.0                 !
 ! R13   R(11,12)                1.2411         -DE/DX =    0.0                 !
 ! R14   R(11,14)                1.4689         -DE/DX =    0.0                 !
 ! R15   R(13,15)                1.4446         -DE/DX =   -0.0001              !
 ! R16   R(13,24)                1.2724         -DE/DX =    0.0004              !
 ! R17   R(14,15)                1.4118         -DE/DX =    0.0                 !
 ! R18   R(14,16)                1.4038         -DE/DX =   -0.0001              !
 ! R19   R(15,17)                1.4135         -DE/DX =    0.0                 !
 ! R20   R(16,18)                1.3795         -DE/DX =    0.0                 !
 ! R21   R(16,19)                1.0825         -DE/DX =    0.0                 !
 ! R22   R(17,20)                1.3773         -DE/DX =    0.0                 !
 ! R23   R(17,21)                1.0837         -DE/DX =    0.0                 !
 ! R24   R(18,20)                1.4064         -DE/DX =    0.0                 !
 ! R25   R(18,23)                1.9126         -DE/DX =    0.0                 !
 ! R26   R(20,22)                1.0822         -DE/DX =    0.0                 !
 ! A1    A(2,1,6)              120.1806         -DE/DX =    0.0                 !
 ! A2    A(2,1,7)              119.7514         -DE/DX =    0.0                 !
 ! A3    A(6,1,7)              120.0679         -DE/DX =    0.0                 !
 ! A4    A(1,2,3)              120.1052         -DE/DX =    0.0                 !
 ! A5    A(1,2,8)              120.8371         -DE/DX =    0.0                 !
 ! A6    A(3,2,8)              119.0577         -DE/DX =    0.0                 !
 ! A7    A(2,3,4)              119.9392         -DE/DX =    0.0                 !
 ! A8    A(2,3,13)             119.6993         -DE/DX =    0.0                 !
 ! A9    A(4,3,13)             120.3615         -DE/DX =   -0.0001              !
 ! A10   A(3,4,5)              118.7707         -DE/DX =    0.0                 !
 ! A11   A(3,4,11)             122.2349         -DE/DX =    0.0                 !
 ! A12   A(5,4,11)             118.9944         -DE/DX =    0.0                 !
 ! A13   A(4,5,6)              120.9163         -DE/DX =    0.0                 !
 ! A14   A(4,5,9)              117.6667         -DE/DX =    0.0001              !
 ! A15   A(6,5,9)              121.417          -DE/DX =    0.0                 !
 ! A16   A(1,6,5)              120.088          -DE/DX =    0.0                 !
 ! A17   A(1,6,10)             119.9882         -DE/DX =    0.0                 !
 ! A18   A(5,6,10)             119.9238         -DE/DX =    0.0                 !
 ! A19   A(4,11,12)            122.2808         -DE/DX =    0.0                 !
 ! A20   A(4,11,14)            115.7653         -DE/DX =    0.0                 !
 ! A21   A(12,11,14)           121.9539         -DE/DX =    0.0                 !
 ! A22   A(3,13,15)            118.961          -DE/DX =    0.0001              !
 ! A23   A(3,13,24)            120.5009         -DE/DX =   -0.0001              !
 ! A24   A(15,13,24)           120.5381         -DE/DX =   -0.0001              !
 ! A25   A(11,14,15)           122.2235         -DE/DX =    0.0                 !
 ! A26   A(11,14,16)           118.5663         -DE/DX =    0.0                 !
 ! A27   A(15,14,16)           119.2102         -DE/DX =    0.0                 !
 ! A28   A(13,15,14)           120.4537         -DE/DX =   -0.0001              !
 ! A29   A(13,15,17)           119.8613         -DE/DX =    0.0                 !
 ! A30   A(14,15,17)           119.685          -DE/DX =    0.0                 !
 ! A31   A(14,16,18)           119.8688         -DE/DX =    0.0                 !
 ! A32   A(14,16,19)           118.115          -DE/DX =    0.0                 !
 ! A33   A(18,16,19)           122.0162         -DE/DX =    0.0                 !
 ! A34   A(15,17,20)           120.6472         -DE/DX =    0.0                 !
 ! A35   A(15,17,21)           119.2278         -DE/DX =    0.0                 !
 ! A36   A(20,17,21)           120.125          -DE/DX =    0.0                 !
 ! A37   A(16,18,20)           121.5733         -DE/DX =    0.0                 !
 ! A38   A(16,18,23)           119.4227         -DE/DX =    0.0                 !
 ! A39   A(20,18,23)           119.004          -DE/DX =    0.0                 !
 ! A40   A(17,20,18)           119.0156         -DE/DX =    0.0                 !
 ! A41   A(17,20,22)           120.4749         -DE/DX =    0.0                 !
 ! A42   A(18,20,22)           120.5096         -DE/DX =    0.0                 !
 ! D1    D(6,1,2,3)              0.0003         -DE/DX =    0.0                 !
 ! D2    D(6,1,2,8)            180.0004         -DE/DX =    0.0                 !
 ! D3    D(7,1,2,3)            180.0002         -DE/DX =    0.0                 !
 ! D4    D(7,1,2,8)              0.0003         -DE/DX =    0.0                 !
 ! D5    D(2,1,6,5)             -0.0003         -DE/DX =    0.0                 !
 ! D6    D(2,1,6,10)          -180.0001         -DE/DX =    0.0                 !
 ! D7    D(7,1,6,5)           -180.0002         -DE/DX =    0.0                 !
 ! D8    D(7,1,6,10)             0.0            -DE/DX =    0.0                 !
 ! D9    D(1,2,3,4)             -0.0002         -DE/DX =    0.0                 !
 ! D10   D(1,2,3,13)           180.0007         -DE/DX =    0.0                 !
 ! D11   D(8,2,3,4)           -180.0002         -DE/DX =    0.0                 !
 ! D12   D(8,2,3,13)             0.0006         -DE/DX =    0.0                 !
 ! D13   D(2,3,4,5)              0.0            -DE/DX =    0.0                 !
 ! D14   D(2,3,4,11)          -180.0012         -DE/DX =    0.0                 !
 ! D15   D(13,3,4,5)          -180.0009         -DE/DX =    0.0                 !
 ! D16   D(13,3,4,11)           -0.002          -DE/DX =    0.0                 !
 ! D17   D(2,3,13,15)         -180.0038         -DE/DX =    0.0                 !
 ! D18   D(2,3,13,24)            0.0001         -DE/DX =    0.0                 !
 ! D19   D(4,3,13,15)           -0.0029         -DE/DX =    0.0                 !
 ! D20   D(4,3,13,24)          180.001          -DE/DX =    0.0                 !
 ! D21   D(3,4,5,6)              0.0            -DE/DX =    0.0                 !
 ! D22   D(3,4,5,9)           -180.0002         -DE/DX =    0.0                 !
 ! D23   D(11,4,5,6)           180.0011         -DE/DX =    0.0                 !
 ! D24   D(11,4,5,9)             0.0009         -DE/DX =    0.0                 !
 ! D25   D(3,4,11,12)         -180.0106         -DE/DX =    0.0                 !
 ! D26   D(3,4,11,14)            0.0067         -DE/DX =    0.0                 !
 ! D27   D(5,4,11,12)           -0.0118         -DE/DX =    0.0                 !
 ! D28   D(5,4,11,14)          180.0055         -DE/DX =    0.0                 !
 ! D29   D(4,5,6,1)              0.0002         -DE/DX =    0.0                 !
 ! D30   D(4,5,6,10)          -180.0            -DE/DX =    0.0                 !
 ! D31   D(9,5,6,1)            180.0004         -DE/DX =    0.0                 !
 ! D32   D(9,5,6,10)             0.0002         -DE/DX =    0.0                 !
 ! D33   D(4,11,14,15)          -0.0067         -DE/DX =    0.0                 !
 ! D34   D(4,11,14,16)        -180.0054         -DE/DX =    0.0                 !
 ! D35   D(12,11,14,15)        180.0105         -DE/DX =    0.0                 !
 ! D36   D(12,11,14,16)          0.0119         -DE/DX =    0.0                 !
 ! D37   D(3,13,15,14)           0.0029         -DE/DX =    0.0                 !
 ! D38   D(3,13,15,17)         180.0038         -DE/DX =    0.0                 !
 ! D39   D(24,13,15,14)       -180.001          -DE/DX =    0.0                 !
 ! D40   D(24,13,15,17)         -0.0001         -DE/DX =    0.0                 !
 ! D41   D(11,14,15,13)          0.0021         -DE/DX =    0.0                 !
 ! D42   D(11,14,15,17)        180.0012         -DE/DX =    0.0                 !
 ! D43   D(16,14,15,13)        180.0008         -DE/DX =    0.0                 !
 ! D44   D(16,14,15,17)         -0.0001         -DE/DX =    0.0                 !
 ! D45   D(11,14,16,18)       -180.0012         -DE/DX =    0.0                 !
 ! D46   D(11,14,16,19)         -0.0009         -DE/DX =    0.0                 !
 ! D47   D(15,14,16,18)          0.0001         -DE/DX =    0.0                 !
 ! D48   D(15,14,16,19)        180.0004         -DE/DX =    0.0                 !
 ! D49   D(13,15,17,20)       -180.0007         -DE/DX =    0.0                 !
 ! D50   D(13,15,17,21)         -0.0006         -DE/DX =    0.0                 !
 ! D51   D(14,15,17,20)          0.0002         -DE/DX =    0.0                 !
 ! D52   D(14,15,17,21)        180.0003         -DE/DX =    0.0                 !
 ! D53   D(14,16,18,20)         -0.0001         -DE/DX =    0.0                 !
 ! D54   D(14,16,18,23)        180.0001         -DE/DX =    0.0                 !
 ! D55   D(19,16,18,20)       -180.0004         -DE/DX =    0.0                 !
 ! D56   D(19,16,18,23)         -0.0002         -DE/DX =    0.0                 !
 ! D57   D(15,17,20,18)         -0.0002         -DE/DX =    0.0                 !
 ! D58   D(15,17,20,22)       -180.0002         -DE/DX =    0.0                 !
 ! D59   D(21,17,20,18)       -180.0003         -DE/DX =    0.0                 !
 ! D60   D(21,17,20,22)         -0.0003         -DE/DX =    0.0                 !
 ! D61   D(16,18,20,17)          0.0002         -DE/DX =    0.0                 !
 ! D62   D(16,18,20,22)        180.0002         -DE/DX =    0.0                 !
 ! D63   D(23,18,20,17)        180.0            -DE/DX =    0.0                 !
 ! D64   D(23,18,20,22)          0.0            -DE/DX =    0.0                 !
 --------------------------------------------------------------------------------
 Lowest energy point so far.  Saving SCF results.
 GradGradGradGradGradGradGradGradGradGradGradGradGradGradGradGradGradGrad

 Largest change from initial coordinates is atom    9       0.001 Angstoms.
 Leave Link  103 at Sun Jan 12 03:08:49 2020, MaxMem=   183500800 cpu:         1.0
 (Enter E:\Gaussian\G09W\l202.exe)
                          Input orientation:                          
 ---------------------------------------------------------------------
 Center     Atomic      Atomic             Coordinates (Angstroms)
 Number     Number       Type             X           Y           Z
 ---------------------------------------------------------------------
      1          6           0       -3.692111    0.256367    0.000022
      2          6           0       -2.665321    1.178006    0.000041
      3          6           0       -1.321760    0.741875   -0.000025
      4          6           0       -1.029311   -0.639293   -0.000107
      5          6           0       -2.093921   -1.555843   -0.000122
      6          6           0       -3.406244   -1.120368   -0.000057
      7          1           0       -4.721072    0.597413    0.000069
      8          1           0       -2.873484    2.241595    0.000108
      9          1           0       -1.849073   -2.611410   -0.000190
     10          1           0       -4.215298   -1.841678   -0.000071
     11          6           0        0.347586   -1.148066   -0.000203
     12          8           0        0.605652   -2.362052   -0.000081
     13          6           0       -0.250138    1.717551    0.000012
     14          6           0        1.405057   -0.128481   -0.000053
     15          6           0        1.117992    1.253873    0.000028
     16          6           0        2.744002   -0.550101   -0.000019
     17          6           0        2.177992    2.188932    0.000145
     18          6           0        3.758610    0.384597    0.000095
     19          1           0        2.943796   -1.613960   -0.000089
     20          6           0        3.488348    1.764781    0.000176
     21          1           0        1.949180    3.248242    0.000211
     22          1           0        4.297786    2.483151    0.000263
     23         35           0        5.578386   -0.204043    0.000139
     24          8           0       -0.510694    2.963034    0.000105
 ---------------------------------------------------------------------
                    Distance matrix (angstroms):
                    1          2          3          4          5
     1  C    0.000000
     2  C    1.379753   0.000000
     3  C    2.419562   1.412574   0.000000
     4  C    2.809397   2.445221   1.411790   0.000000
     5  C    2.416261   2.792925   2.423992   1.404799   0.000000
     6  C    1.406101   2.414848   2.795178   2.425128   1.382689
     7  H    1.084008   2.136165   3.402380   3.893398   3.396828
     8  H    2.147389   1.083768   2.158011   3.420599   3.876630
     9  H    3.408949   3.876331   3.394493   2.135710   1.083593
    10  H    2.162295   3.394249   3.879086   3.405326   2.140547
    11  C    4.276866   3.806340   2.521625   1.467888   2.475326
    12  O    5.032582   4.819884   3.653667   2.375079   2.817387
    13  C    3.739283   2.474715   1.449247   2.482302   3.756946
    14  C    5.111676   4.274914   2.862351   2.487383   3.778917
    15  C    4.912444   3.784073   2.492896   2.862689   4.267422
    16  C    6.486443   5.678656   4.266101   3.774366   4.941358
    17  C    6.180042   4.947692   3.787116   4.276172   5.680897
    18  C    7.451824   6.472742   5.092917   4.896175   6.165827
    19  H    6.894446   6.265562   4.872877   4.090911   5.038052
    20  C    7.337186   6.181581   4.917670   5.117501   6.495250
    21  H    6.385568   5.057617   4.120792   4.897380   6.279005
    22  H    8.294397   7.084367   5.883141   6.174756   7.560912
    23  Br   9.281923   8.358754   6.964680   6.622016   7.790485
    24  O    4.177016   2.797989   2.364610   3.639468   4.788200
                    6          7          8          9         10
     6  C    0.000000
     7  H    2.163226   0.000000
     8  H    3.403914   2.473240   0.000000
     9  H    2.155919   4.306383   4.959948   0.000000
    10  H    1.083909   2.490979   4.298091   2.488274   0.000000
    11  C    3.753932   5.360783   4.676013   2.639448   4.615302
    12  O    4.199653   6.093638   5.770439   2.467358   4.848953
    13  C    4.244383   4.609117   2.675176   4.614813   5.328284
    14  C    4.912480   6.168986   4.891133   4.093202   5.875665
    15  C    5.109376   5.875850   4.111870   4.872770   6.166557
    16  C    6.176627   7.552756   6.272935   5.034415   7.078137
    17  C    6.491160   7.080256   5.051751   6.265824   7.557777
    18  C    7.321205   8.482352   6.887170   6.357843   8.278859
    19  H    6.369194   7.977492   6.978973   4.895559   7.162715
    20  C    7.473920   8.292004   6.379676   6.902110   8.506040
    21  H    6.911245   7.177685   4.926604   6.982997   7.994253
    22  H    8.505141   9.213892   7.175337   7.983635   9.548652
    23  Br   9.031235  10.330594   8.798594   7.807853   9.929657
    24  O    5.005835   4.829436   2.470476   5.732861   6.067072
                   11         12         13         14         15
    11  C    0.000000
    12  O    1.241113   0.000000
    13  C    2.927291   4.168398   0.000000
    14  C    1.468945   2.372318   2.479416   0.000000
    15  C    2.522467   3.652042   1.444568   1.411846   0.000000
    16  C    2.469893   2.802804   3.755944   1.403758   2.428628
    17  C    3.806041   4.814947   2.473463   2.442915   1.413484
    18  C    3.739537   4.181534   4.224550   2.408829   2.780019
    19  H    2.637682   2.454905   4.615212   2.138777   3.399710
    20  C    4.283581   5.033954   3.738784   2.815056   2.424792
    21  H    4.678956   5.768923   2.679555   3.420281   2.160643
    22  H    5.365615   6.091622   4.611915   3.897243   3.409137
    23  Br   5.315303   5.420801   6.137118   4.174013   4.692615
    24  O    4.199737   5.440844   1.272446   3.636972   2.360900
                   16         17         18         19         20
    16  C    0.000000
    17  C    2.796904   0.000000
    18  C    1.379525   2.398745   0.000000
    19  H    1.082458   3.879233   2.158275   0.000000
    20  C    2.431611   1.377293   1.406396   3.422343   0.000000
    21  H    3.880612   1.083740   3.387403   4.962889   2.137684
    22  H    3.408058   2.140114   2.166712   4.315045   1.082241
    23  Br   2.855431   4.158005   1.912611   2.988131   2.871329
    24  O    4.789067   2.797904   4.987514   5.734316   4.174703
                   21         22         23         24
    21  H    0.000000
    22  H    2.470084   0.000000
    23  Br   5.008932   2.976734   0.000000
    24  O    2.476353   4.832367   6.863474   0.000000
 Stoichiometry    C14H7BrO2
 Framework group  C1[X(C14H7BrO2)]
 Deg. of freedom    66
 Full point group                 C1      NOp   1
 RotChk:  IX=0 Diff= 1.02D-15
 Largest Abelian subgroup         C1      NOp   1
 Largest concise Abelian subgroup C1      NOp   1
                         Standard orientation:                         
 ---------------------------------------------------------------------
 Center     Atomic      Atomic             Coordinates (Angstroms)
 Number     Number       Type             X           Y           Z
 ---------------------------------------------------------------------
      1          6           0        5.065510    0.070160    0.000013
      2          6           0        4.038987    0.992097   -0.000006
      3          6           0        2.695300    0.556355    0.000059
      4          6           0        2.402449   -0.824727    0.000142
      5          6           0        3.466794   -1.741586    0.000157
      6          6           0        4.779243   -1.306492    0.000092
      7          1           0        6.094570    0.410908   -0.000034
      8          1           0        4.247459    2.055626   -0.000073
      9          1           0        3.221640   -2.797083    0.000224
     10          1           0        5.588088   -2.028037    0.000106
     11          6           0        1.025405   -1.333101    0.000238
     12          8           0        0.766987   -2.547012    0.000116
     13          6           0        1.623961    1.532342    0.000023
     14          6           0       -0.031770   -0.313209    0.000088
     15          6           0        0.255697    1.069062    0.000007
     16          6           0       -1.370837   -0.734440    0.000054
     17          6           0       -0.804033    2.004428   -0.000110
     18          6           0       -2.385174    0.200552   -0.000060
     19          1           0       -1.570940   -1.798242    0.000124
     20          6           0       -2.114511    1.580658   -0.000142
     21          1           0       -0.574913    3.063671   -0.000176
     22          1           0       -2.923741    2.299262   -0.000228
     23         35           0       -4.205120   -0.387560   -0.000104
     24          8           0        1.884878    2.777750   -0.000070
 ---------------------------------------------------------------------
 Rotational constants (GHZ):      1.0041511      0.1781054      0.1512740
 Leave Link  202 at Sun Jan 12 03:08:49 2020, MaxMem=   183500800 cpu:         0.0
 (Enter E:\Gaussian\G09W\l601.exe)
 Copying SCF densities to generalized density rwf, IOpCl= 0 IROHF=0.

 **********************************************************************

            Population analysis using the SCF density.

 **********************************************************************

 Orbital symmetries:
       Occupied  (A) (A) (A) (A) (A) (A) (A) (A) (A) (A) (A) (A)
                 (A) (A) (A) (A) (A) (A) (A) (A) (A) (A) (A) (A)
                 (A) (A) (A) (A) (A) (A) (A) (A) (A) (A) (A) (A)
                 (A) (A) (A) (A) (A) (A) (A) (A) (A) (A) (A) (A)
                 (A) (A) (A) (A) (A) (A) (A) (A) (A) (A) (A) (A)
                 (A) (A) (A) (A) (A) (A) (A) (A) (A) (A) (A)
       Virtual   (A) (A) (A) (A) (A) (A) (A) (A) (A) (A) (A) (A)
                 (A) (A) (A) (A) (A) (A) (A) (A) (A) (A) (A) (A)
                 (A) (A) (A) (A) (A) (A) (A) (A) (A) (A) (A) (A)
                 (A) (A) (A) (A) (A) (A) (A) (A) (A) (A) (A) (A)
                 (A) (A) (A) (A) (A) (A) (A) (A) (A) (A) (A) (A)
                 (A) (A) (A) (A) (A) (A) (A) (A) (A) (A) (A) (A)
                 (A) (A) (A) (A) (A) (A) (A) (A) (A) (A) (A) (A)
                 (A) (A) (A) (A) (A) (A) (A) (A) (A) (A) (A) (A)
                 (A) (A) (A) (A) (A) (A) (A) (A) (A) (A) (A) (A)
                 (A) (A) (A) (A) (A) (A) (A) (A) (A) (A) (A) (A)
                 (A) (A) (A) (A) (A) (A) (A) (A) (A) (A) (A) (A)
                 (A) (A) (A) (A) (A) (A) (A) (A) (A) (A) (A) (A)
                 (A) (A) (A) (A) (A) (A) (A) (A) (A) (A) (A) (A)
                 (A) (A) (A) (A) (A) (A) (A) (A) (A) (A) (A) (A)
                 (A) (A) (A) (A) (A) (A) (A) (A) (A) (A) (A) (A)
                 (A) (A) (A) (A) (A) (A) (A) (A) (A) (A) (A) (A)
                 (A) (A) (A) (A) (A) (A) (A) (A) (A) (A) (A) (A)
                 (A) (A) (A) (A) (A) (A) (A) (A) (A) (A) (A) (A)
                 (A) (A) (A) (A) (A) (A) (A) (A) (A) (A) (A) (A)
                 (A) (A) (A) (A) (A) (A) (A) (A) (A) (A) (A) (A)
                 (A) (A) (A) (A) (A) (A) (A) (A) (A) (A) (A) (A)
                 (A) (A) (A) (A) (A) (A) (A) (A) (A) (A) (A) (A)
                 (A) (A) (A) (A) (A) (A) (A) (A) (A) (A) (A) (A)
                 (A) (A) (A) (A) (A) (A)
 The electronic state is 1-A.
 Alpha  occ. eigenvalues -- -482.84534 -62.49828 -56.31863 -56.31481 -56.31457
 Alpha  occ. eigenvalues --  -19.13084 -19.12207 -10.28504 -10.27869 -10.25825
 Alpha  occ. eigenvalues --  -10.21819 -10.21499 -10.21125 -10.21086 -10.21023
 Alpha  occ. eigenvalues --  -10.21007 -10.20798 -10.20026 -10.19997 -10.19937
 Alpha  occ. eigenvalues --  -10.19866  -8.70796  -6.53943  -6.52664  -6.52602
 Alpha  occ. eigenvalues --   -2.65037  -2.64678  -2.64633  -2.63616  -2.63615
 Alpha  occ. eigenvalues --   -1.05738  -1.03646  -0.90828  -0.88996  -0.84273
 Alpha  occ. eigenvalues --   -0.80724  -0.78799  -0.78211  -0.75888  -0.70344
 Alpha  occ. eigenvalues --   -0.67280  -0.64747  -0.62456  -0.59308  -0.56815
 Alpha  occ. eigenvalues --   -0.55650  -0.51216  -0.49761  -0.49416  -0.47973
 Alpha  occ. eigenvalues --   -0.46240  -0.45883  -0.45522  -0.45274  -0.44776
 Alpha  occ. eigenvalues --   -0.43655  -0.41266  -0.40671  -0.40450  -0.38448
 Alpha  occ. eigenvalues --   -0.37873  -0.37443  -0.36795  -0.32983  -0.30849
 Alpha  occ. eigenvalues --   -0.29220  -0.28833  -0.28439  -0.27884  -0.27765
 Alpha  occ. eigenvalues --   -0.26788
 Alpha virt. eigenvalues --   -0.12976  -0.07718  -0.04314  -0.02854  -0.02073
 Alpha virt. eigenvalues --    0.03539   0.03765   0.05303   0.07047   0.08446
 Alpha virt. eigenvalues --    0.09391   0.10632   0.12174   0.12239   0.12884
 Alpha virt. eigenvalues --    0.19183   0.19839   0.20385   0.20767   0.21121
 Alpha virt. eigenvalues --    0.23768   0.24083   0.25279   0.26206   0.26675
 Alpha virt. eigenvalues --    0.27310   0.28007   0.28659   0.29015   0.30871
 Alpha virt. eigenvalues --    0.31970   0.34559   0.35015   0.36396   0.37046
 Alpha virt. eigenvalues --    0.37409   0.37562   0.37858   0.38812   0.39119
 Alpha virt. eigenvalues --    0.40228   0.40312   0.40735   0.41346   0.42374
 Alpha virt. eigenvalues --    0.42633   0.42754   0.44314   0.44566   0.45076
 Alpha virt. eigenvalues --    0.45522   0.45573   0.47685   0.47866   0.51856
 Alpha virt. eigenvalues --    0.52086   0.53420   0.54854   0.55736   0.55769
 Alpha virt. eigenvalues --    0.56082   0.57577   0.58709   0.58801   0.59527
 Alpha virt. eigenvalues --    0.59675   0.60476   0.61444   0.61598   0.62337
 Alpha virt. eigenvalues --    0.63053   0.64705   0.65334   0.65641   0.66886
 Alpha virt. eigenvalues --    0.70782   0.70844   0.71397   0.71822   0.72775
 Alpha virt. eigenvalues --    0.74368   0.75295   0.77478   0.77880   0.79279
 Alpha virt. eigenvalues --    0.80618   0.81046   0.82797   0.83379   0.84750
 Alpha virt. eigenvalues --    0.86792   0.87488   0.88535   0.90211   0.92073
 Alpha virt. eigenvalues --    0.92680   0.96162   0.96635   0.96656   0.97616
 Alpha virt. eigenvalues --    0.98360   0.99296   1.00125   1.03297   1.04383
 Alpha virt. eigenvalues --    1.08818   1.09120   1.09388   1.10769   1.11051
 Alpha virt. eigenvalues --    1.11592   1.12308   1.14447   1.15261   1.15877
 Alpha virt. eigenvalues --    1.17558   1.18597   1.19734   1.22745   1.24467
 Alpha virt. eigenvalues --    1.25255   1.26511   1.27736   1.29578   1.32391
 Alpha virt. eigenvalues --    1.39076   1.41769   1.43419   1.45200   1.45580
 Alpha virt. eigenvalues --    1.46630   1.46871   1.49747   1.52332   1.53568
 Alpha virt. eigenvalues --    1.55627   1.56718   1.56990   1.57676   1.64575
 Alpha virt. eigenvalues --    1.66165   1.68249   1.69635   1.70174   1.73509
 Alpha virt. eigenvalues --    1.77250   1.77525   1.78677   1.80864   1.81589
 Alpha virt. eigenvalues --    1.82326   1.83596   1.84037   1.84446   1.86611
 Alpha virt. eigenvalues --    1.87555   1.87949   1.88594   1.90132   1.90826
 Alpha virt. eigenvalues --    1.91079   1.91816   1.94105   1.95416   1.97262
 Alpha virt. eigenvalues --    2.01249   2.06428   2.07816   2.13802   2.17060
 Alpha virt. eigenvalues --    2.18853   2.19890   2.24482   2.25494   2.26719
 Alpha virt. eigenvalues --    2.29551   2.31000   2.31768   2.32901   2.33712
 Alpha virt. eigenvalues --    2.35480   2.36413   2.39211   2.46142   2.46358
 Alpha virt. eigenvalues --    2.51117   2.51221   2.53932   2.55812   2.56563
 Alpha virt. eigenvalues --    2.57942   2.64907   2.65424   2.69068   2.72629
 Alpha virt. eigenvalues --    2.72871   2.76560   2.78756   2.79204   2.81215
 Alpha virt. eigenvalues --    2.82022   2.83177   2.88097   2.89018   2.91368
 Alpha virt. eigenvalues --    2.92321   2.96955   2.97702   3.02893   3.04205
 Alpha virt. eigenvalues --    3.06165   3.11603   3.13360   3.15792   3.16781
 Alpha virt. eigenvalues --    3.18892   3.23565   3.24635   3.25575   3.26179
 Alpha virt. eigenvalues --    3.27679   3.28406   3.29275   3.30326   3.31677
 Alpha virt. eigenvalues --    3.35656   3.39347   3.42102   3.44230   3.44803
 Alpha virt. eigenvalues --    3.50420   3.51452   3.52617   3.56268   3.67538
 Alpha virt. eigenvalues --    3.68676   3.74284   3.80483   3.90772   3.93824
 Alpha virt. eigenvalues --    4.11012   4.11242   4.12440   4.15615   4.19909
 Alpha virt. eigenvalues --    4.35769   4.36615   4.53344   4.74425   4.77185
 Alpha virt. eigenvalues --    4.78411   4.86188   4.88318   5.05636   5.07629
 Alpha virt. eigenvalues --    5.57244   5.70036   6.46941   7.44928   7.52283
 Alpha virt. eigenvalues --    7.61968  23.17184  23.34888  23.74699  23.75775
 Alpha virt. eigenvalues --   23.77195  23.84742  23.85133  23.87273  23.97976
 Alpha virt. eigenvalues --   23.99836  24.02842  24.03259  24.10301  24.11833
 Alpha virt. eigenvalues --   47.76013  49.94261  49.95846 289.64813 289.72071
 Alpha virt. eigenvalues --  289.840191020.50881
          Condensed to atoms (all electrons):
               1          2          3          4          5          6
     1  C    4.990544   0.482808  -0.031047  -0.049094  -0.029027   0.480049
     2  C    0.482808   5.119647   0.398226  -0.102049  -0.058022  -0.030177
     3  C   -0.031047   0.398226   5.563167   0.425996  -0.089972  -0.050697
     4  C   -0.049094  -0.102049   0.425996   5.525417   0.400816  -0.031409
     5  C   -0.029027  -0.058022  -0.089972   0.400816   5.107560   0.490363
     6  C    0.480049  -0.030177  -0.050697  -0.031409   0.490363   4.981815
     7  H    0.399309  -0.041593   0.007384   0.000194   0.005916  -0.042005
     8  H   -0.038680   0.401690  -0.062630   0.004364  -0.001007   0.006753
     9  H    0.006729  -0.001064   0.004831  -0.065415   0.402725  -0.038354
    10  H   -0.042396   0.006123  -0.000050   0.007296  -0.042325   0.400578
    11  C   -0.002167   0.011701   0.044769   0.163432  -0.072862   0.012275
    12  O    0.000004  -0.000025   0.004770  -0.153322   0.019858   0.001193
    13  C    0.013838  -0.076144   0.124228   0.062143   0.011615  -0.002066
    14  C    0.000573  -0.005936  -0.146660  -0.027956   0.035063  -0.000815
    15  C   -0.000794   0.037272  -0.020990  -0.147918  -0.004920   0.000532
    16  C    0.000005   0.000091  -0.005073   0.035217  -0.001450  -0.000012
    17  C   -0.000016  -0.001217   0.037868  -0.006080   0.000088   0.000005
    18  C    0.000000   0.000007   0.000583  -0.000759  -0.000020   0.000000
    19  H    0.000001  -0.000001  -0.000279   0.004798  -0.000181  -0.000005
    20  C    0.000000  -0.000017  -0.000827   0.000635   0.000006   0.000000
    21  H   -0.000005  -0.000153   0.004376  -0.000277  -0.000001   0.000001
    22  H    0.000000   0.000000  -0.000024   0.000010   0.000000   0.000000
    23  Br   0.000000   0.000000   0.000003  -0.000006   0.000000   0.000000
    24  O    0.001432   0.021076  -0.165939   0.005281  -0.000060   0.000006
               7          8          9         10         11         12
     1  C    0.399309  -0.038680   0.006729  -0.042396  -0.002167   0.000004
     2  C   -0.041593   0.401690  -0.001064   0.006123   0.011701  -0.000025
     3  C    0.007384  -0.062630   0.004831  -0.000050   0.044769   0.004770
     4  C    0.000194   0.004364  -0.065415   0.007296   0.163432  -0.153322
     5  C    0.005916  -0.001007   0.402725  -0.042325  -0.072862   0.019858
     6  C   -0.042005   0.006753  -0.038354   0.400578   0.012275   0.001193
     7  H    0.452391  -0.006278  -0.000234  -0.005504   0.000028   0.000000
     8  H   -0.006278   0.454469   0.000072  -0.000231   0.000102   0.000003
     9  H   -0.000234   0.000072   0.457718  -0.006091  -0.011508   0.023269
    10  H   -0.005504  -0.000231  -0.006091   0.451989  -0.000345  -0.000047
    11  C    0.000028   0.000102  -0.011508  -0.000345   4.774403   0.753398
    12  O    0.000000   0.000003   0.023269  -0.000047   0.753398   7.793586
    13  C   -0.000408  -0.010627   0.000105   0.000023  -0.066199  -0.001420
    14  C    0.000009  -0.000279   0.004683  -0.000023   0.128552  -0.160328
    15  C   -0.000025   0.004421  -0.000267   0.000011   0.047785   0.004733
    16  C    0.000000  -0.000001  -0.000190   0.000000  -0.065234   0.022115
    17  C    0.000000  -0.000152  -0.000001   0.000000   0.011140  -0.000033
    18  C    0.000000   0.000001  -0.000007   0.000000   0.013217   0.001937
    19  H    0.000000  -0.000001  -0.000085   0.000000  -0.010316   0.025077
    20  C    0.000000  -0.000005   0.000001   0.000000  -0.001954   0.000020
    21  H    0.000000  -0.000078  -0.000001   0.000000   0.000084   0.000003
    22  H    0.000000   0.000000   0.000000   0.000000   0.000017   0.000000
    23  Br   0.000000   0.000000   0.000000   0.000000  -0.000393  -0.000001
    24  O   -0.000059   0.023972   0.000003   0.000000  -0.001209   0.000000
              13         14         15         16         17         18
     1  C    0.013838   0.000573  -0.000794   0.000005  -0.000016   0.000000
     2  C   -0.076144  -0.005936   0.037272   0.000091  -0.001217   0.000007
     3  C    0.124228  -0.146660  -0.020990  -0.005073   0.037868   0.000583
     4  C    0.062143  -0.027956  -0.147918   0.035217  -0.006080  -0.000759
     5  C    0.011615   0.035063  -0.004920  -0.001450   0.000088  -0.000020
     6  C   -0.002066  -0.000815   0.000532  -0.000012   0.000005   0.000000
     7  H   -0.000408   0.000009  -0.000025   0.000000   0.000000   0.000000
     8  H   -0.010627  -0.000279   0.004421  -0.000001  -0.000152   0.000001
     9  H    0.000105   0.004683  -0.000267  -0.000190  -0.000001  -0.000007
    10  H    0.000023  -0.000023   0.000011   0.000000   0.000000   0.000000
    11  C   -0.066199   0.128552   0.047785  -0.065234   0.011140   0.013217
    12  O   -0.001420  -0.160328   0.004733   0.022115  -0.000033   0.001937
    13  C    4.846502   0.064595   0.115357   0.012235  -0.076195  -0.002148
    14  C    0.064595   5.577325   0.425985   0.373816  -0.100737  -0.018859
    15  C    0.115357   0.425985   5.580334  -0.097912   0.387459  -0.053318
    16  C    0.012235   0.373816  -0.097912   5.198848  -0.057341   0.427869
    17  C   -0.076195  -0.100737   0.387459  -0.057341   5.120379  -0.015521
    18  C   -0.002148  -0.018859  -0.053318   0.427869  -0.015521   5.122383
    19  H    0.000150  -0.062100   0.004625   0.400016  -0.001463  -0.045114
    20  C    0.014665  -0.048307  -0.030330  -0.032100   0.471356   0.437672
    21  H   -0.009879   0.003939  -0.061392  -0.000801   0.400458   0.006771
    22  H   -0.000328  -0.000288   0.007426   0.006195  -0.036596  -0.049444
    23  Br   0.000017   0.009732  -0.000370  -0.088507   0.007990   0.294739
    24  O    0.749866   0.005258  -0.167470  -0.000051   0.021932  -0.000004
              19         20         21         22         23         24
     1  C    0.000001   0.000000  -0.000005   0.000000   0.000000   0.001432
     2  C   -0.000001  -0.000017  -0.000153   0.000000   0.000000   0.021076
     3  C   -0.000279  -0.000827   0.004376  -0.000024   0.000003  -0.165939
     4  C    0.004798   0.000635  -0.000277   0.000010  -0.000006   0.005281
     5  C   -0.000181   0.000006  -0.000001   0.000000   0.000000  -0.000060
     6  C   -0.000005   0.000000   0.000001   0.000000   0.000000   0.000006
     7  H    0.000000   0.000000   0.000000   0.000000   0.000000  -0.000059
     8  H   -0.000001  -0.000005  -0.000078   0.000000   0.000000   0.023972
     9  H   -0.000085   0.000001  -0.000001   0.000000   0.000000   0.000003
    10  H    0.000000   0.000000   0.000000   0.000000   0.000000   0.000000
    11  C   -0.010316  -0.001954   0.000084   0.000017  -0.000393  -0.001209
    12  O    0.025077   0.000020   0.000003   0.000000  -0.000001   0.000000
    13  C    0.000150   0.014665  -0.009879  -0.000328   0.000017   0.749866
    14  C   -0.062100  -0.048307   0.003939  -0.000288   0.009732   0.005258
    15  C    0.004625  -0.030330  -0.061392   0.007426  -0.000370  -0.167470
    16  C    0.400016  -0.032100  -0.000801   0.006195  -0.088507  -0.000051
    17  C   -0.001463   0.471356   0.400458  -0.036596   0.007990   0.021932
    18  C   -0.045114   0.437672   0.006771  -0.049444   0.294739  -0.000004
    19  H    0.442960   0.007155   0.000067  -0.000129  -0.005105   0.000003
    20  C    0.007155   5.036932  -0.038073   0.400005  -0.079933   0.001571
    21  H    0.000067  -0.038073   0.445951  -0.006264  -0.000224   0.023788
    22  H   -0.000129   0.400005  -0.006264   0.435252  -0.004427  -0.000056
    23  Br  -0.005105  -0.079933  -0.000224  -0.004427  34.871055   0.000000
    24  O    0.000003   0.001571   0.023788  -0.000056   0.000000   7.845183
 Mulliken charges:
               1
     1  C   -0.182065
     2  C   -0.162244
     3  C   -0.042014
     4  C   -0.051315
     5  C   -0.174164
     6  C   -0.178030
     7  H    0.230875
     8  H    0.224123
     9  H    0.223081
    10  H    0.230991
    11  C    0.271285
    12  O   -0.334793
    13  C    0.230073
    14  C   -0.057243
    15  C   -0.030235
    16  C   -0.127736
    17  C   -0.163322
    18  C   -0.119988
    19  H    0.239925
    20  C   -0.138471
    21  H    0.231709
    22  H    0.248653
    23  Br  -0.004570
    24  O   -0.364524
 Sum of Mulliken charges =   0.00000
 Mulliken charges with hydrogens summed into heavy atoms:
               1
     1  C    0.048810
     2  C    0.061879
     3  C   -0.042014
     4  C   -0.051315
     5  C    0.048917
     6  C    0.052961
    11  C    0.271285
    12  O   -0.334793
    13  C    0.230073
    14  C   -0.057243
    15  C   -0.030235
    16  C    0.112189
    17  C    0.068386
    18  C   -0.119988
    20  C    0.110182
    23  Br  -0.004570
    24  O   -0.364524
 Electronic spatial extent (au):  <R**2>=           6182.7041
 Charge=              0.0000 electrons
 Dipole moment (field-independent basis, Debye):
    X=              2.1068    Y=              0.2699    Z=              0.0002  Tot=              2.1240
 Quadrupole moment (field-independent basis, Debye-Ang):
   XX=            -83.8513   YY=           -117.4214   ZZ=           -111.3971
   XY=            -10.6827   XZ=              0.0007   YZ=             -0.0006
 Traceless Quadrupole moment (field-independent basis, Debye-Ang):
   XX=             20.3720   YY=            -13.1982   ZZ=             -7.1738
   XY=            -10.6827   XZ=              0.0007   YZ=             -0.0006
 Octapole moment (field-independent basis, Debye-Ang**2):
  XXX=             16.7042  YYY=            -15.1261  ZZZ=             -0.0034  XYY=            -63.7450
  XXY=            -24.3812  XXZ=             -0.0019  XZZ=            -48.9608  YZZ=             -4.5376
  YYZ=             -0.0015  XYZ=              0.0002
 Hexadecapole moment (field-independent basis, Debye-Ang**3):
 XXXX=          -4928.9546 YYYY=          -1446.0211 ZZZZ=           -121.4919 XXXY=            -25.6367
 XXXZ=             -0.0585 YYYX=            -52.8363 YYYZ=              0.0285 ZZZX=             -0.0645
 ZZZY=              0.0316 XXYY=          -1124.4666 XXZZ=          -1074.2606 YYZZ=           -249.2290
 XXYZ=              0.0003 YYXZ=             -0.0130 ZZXY=             28.1368
 N-N= 1.374156845266D+03 E-N=-1.050457916270D+04  KE= 3.256747763517D+03
 No NMR shielding tensors so no spin-rotation constants.
 Leave Link  601 at Sun Jan 12 03:08:50 2020, MaxMem=   183500800 cpu:         1.0
 (Enter E:\Gaussian\G09W\l9999.exe)
 1|1|UNPC-DESKTOP-K4OTQA5|FOpt|RB3LYP TD-FC|6-311G(d)|C14H7Br1O2|������
 |12-Jan-2020|0||#p opt td=(singlets,nstates=5,root=1) b3lyp/6-311g(d) 
 scrf=(solvent=acetonitrile) guess=save geom=connectivity empiricaldisp
 ersion=gd3bj||2-BrAQ excited singlet opt||0,1|C,-3.6921110819,0.256367
 0915,0.000021695|C,-2.6653209184,1.1780064853,0.0000413274|C,-1.321760
 1501,0.7418746978,-0.0000245833|C,-1.029310563,-0.6392930286,-0.000107
 0367|C,-2.0939212029,-1.5558430622,-0.0001222041|C,-3.4062435542,-1.12
 03679462,-0.0000572001|H,-4.7210724255,0.597413448,0.0000691838|H,-2.8
 734843176,2.2415953631,0.0001082782|H,-1.849073157,-2.6114104082,-0.00
 01895136|H,-4.2152981296,-1.8416783605,-0.0000706934|C,0.3475859171,-1
 .1480663281,-0.0002028133|O,0.6056517548,-2.3620524974,-0.0000807716|C
 ,-0.2501379989,1.7175507864,0.0000121942|C,1.4050571576,-0.128480645,-
 0.0000532555|C,1.1179916807,1.2538733265,0.000028102|C,2.7440018754,-0
 .5501009465,-0.0000187715|C,2.1779924719,2.1889322533,0.0001450584|C,3
 .7586096933,0.3845969443,0.0000951974|H,2.9437960683,-1.6139602893,-0.
 0000886355|C,3.4883479484,1.7647812424,0.000176445|H,1.9491801178,3.24
 82416876,0.0002112823|H,4.2977860475,2.4831509935,0.0002628019|Br,5.57
 83857272,-0.204043192,0.0001385993|O,-0.5106939211,2.9630343844,0.0001
 053138||Version=IA32W-G09RevD.01|State=1-A|HF=-3262.5373643|RMSD=8.538
 e-009|RMSF=1.006e-004|Dipole=-1.1810445,1.2284115,-0.0000171|PG=C01 [X
 (C14H7Br1O2)]||@


 SCIENCE IS A VERY HUMAN FORM OF KNOWLEDGE.
 WE ARE ALWAYS AT THE BRINK OF THE KNOWN,
 WE ALWAYS FEEL FORWARD FOR WHAT IS HOPED.
 EVERY JUDGEMENT IN SCIENCE STANDS ON THE EDGE OF ERROR, AND IS PERSONAL.
 SCIENCE IS A TRIBUTE TO WHAT WE CAN KNOW ALTHOUGH WE ARE FALLIBLE.

                     -- J. BRONOWSKI
 Job cpu time:       0 days  5 hours 54 minutes 28.0 seconds.
 File lengths (MBytes):  RWF=    314 Int=      0 D2E=      0 Chk=     33 Scr=      1
 Normal termination of Gaussian 09 at Sun Jan 12 03:08:52 2020.
