# Supplementary material for: 2-Bromoanthraquinone as a highly efficient photocatalyst for the oxidation of sec-aromatic alcohols: experimental and DFT study
Source: Royal Society of Chemistry journal article supplement (doi:10.1039/d0ra06414a), 2020-01-01
Supplement: d0ra06414a15.out [file d0ra06414a15.out]

 Entering Link 1 = E:\Gaussian\G09W\l1.exe PID=    172144.
  
 Copyright (c) 1988,1990,1992,1993,1995,1998,2003,2009,2013,
            Gaussian, Inc.  All Rights Reserved.
  
 This is part of the Gaussian(R) 09 program.  It is based on
 the Gaussian(R) 03 system (copyright 2003, Gaussian, Inc.),
 the Gaussian(R) 98 system (copyright 1998, Gaussian, Inc.),
 the Gaussian(R) 94 system (copyright 1995, Gaussian, Inc.),
 the Gaussian 92(TM) system (copyright 1992, Gaussian, Inc.),
 the Gaussian 90(TM) system (copyright 1990, Gaussian, Inc.),
 the Gaussian 88(TM) system (copyright 1988, Gaussian, Inc.),
 the Gaussian 86(TM) system (copyright 1986, Carnegie Mellon
 University), and the Gaussian 82(TM) system (copyright 1983,
 Carnegie Mellon University). Gaussian is a federally registered
 trademark of Gaussian, Inc.
  
 This software contains proprietary and confidential information,
 including trade secrets, belonging to Gaussian, Inc.
  
 This software is provided under written license and may be
 used, copied, transmitted, or stored only in accord with that
 written license.
  
 The following legend is applicable only to US Government
 contracts under FAR:
  
                    RESTRICTED RIGHTS LEGEND
  
 Use, reproduction and disclosure by the US Government is
 subject to restrictions as set forth in subparagraphs (a)
 and (c) of the Commercial Computer Software - Restricted
 Rights clause in FAR 52.227-19.
  
 Gaussian, Inc.
 340 Quinnipiac St., Bldg. 40, Wallingford CT 06492
  
  
 ---------------------------------------------------------------
 Warning -- This program may not be used in any manner that
 competes with the business of Gaussian, Inc. or will provide
 assistance to any competitor of Gaussian, Inc.  The licensee
 of this program is prohibited from giving any competitor of
 Gaussian, Inc. access to this program.  By using this program,
 the user acknowledges that Gaussian, Inc. is engaged in the
 business of creating and licensing software in the field of
 computational chemistry and represents and warrants to the
 licensee that it is not a competitor of Gaussian, Inc. and that
 it will not use this program in any manner prohibited above.
 ---------------------------------------------------------------
  

 Cite this work as:
 Gaussian 09, Revision D.01,
 M. J. Frisch, G. W. Trucks, H. B. Schlegel, G. E. Scuseria, 
 M. A. Robb, J. R. Cheeseman, G. Scalmani, V. Barone, B. Mennucci, 
 G. A. Petersson, H. Nakatsuji, M. Caricato, X. Li, H. P. Hratchian, 
 A. F. Izmaylov, J. Bloino, G. Zheng, J. L. Sonnenberg, M. Hada, 
 M. Ehara, K. Toyota, R. Fukuda, J. Hasegawa, M. Ishida, T. Nakajima, 
 Y. Honda, O. Kitao, H. Nakai, T. Vreven, J. A. Montgomery, Jr., 
 J. E. Peralta, F. Ogliaro, M. Bearpark, J. J. Heyd, E. Brothers, 
 K. N. Kudin, V. N. Staroverov, T. Keith, R. Kobayashi, J. Normand, 
 K. Raghavachari, A. Rendell, J. C. Burant, S. S. Iyengar, J. Tomasi, 
 M. Cossi, N. Rega, J. M. Millam, M. Klene, J. E. Knox, J. B. Cross, 
 V. Bakken, C. Adamo, J. Jaramillo, R. Gomperts, R. E. Stratmann, 
 O. Yazyev, A. J. Austin, R. Cammi, C. Pomelli, J. W. Ochterski, 
 R. L. Martin, K. Morokuma, V. G. Zakrzewski, G. A. Voth, 
 P. Salvador, J. J. Dannenberg, S. Dapprich, A. D. Daniels, 
 O. Farkas, J. B. Foresman, J. V. Ortiz, J. Cioslowski, 
 and D. J. Fox, Gaussian, Inc., Wallingford CT, 2013.
 
 ******************************************
 Gaussian 09:  IA32W-G09RevD.01 24-Apr-2013
                15-Jan-2020 
 ******************************************
 %nprocshared=2
 Will use up to    2 processors via shared memory.
 %mem=1GB
 %chk=E:\Gaussian file\2-BrAQ excited triplet state energy.chk
 ----------------------------------------------------------------------
 #p td=(triplets,nstates=4,root=1) m062x/gen scrf=(solvent=acetonitrile
 ,read) guess=save geom=connectivity empiricaldispersion=gd3
 ----------------------------------------------------------------------
 1/38=1,40=2,57=2/1;
 2/12=2,17=6,18=5,40=1/2;
 3/5=7,11=9,16=1,25=1,30=1,70=2203,72=2,74=-55,124=31/1,2,8,3;
 4//1;
 5/5=2,38=5,53=2/2;
 8/6=1,10=1,107=1,108=4/1;
 9/8=1,41=4,42=1,48=3,70=2/14;
 6/7=2,8=2,9=2,10=2/1;
 99/5=1,9=1/99;
 Leave Link    1 at Wed Jan 15 22:34:27 2020, MaxMem=   134217728 cpu:         0.0
 (Enter E:\Gaussian\G09W\l101.exe)
 -----------------------------------
 2-BrAQ excited triplet state energy
 -----------------------------------
 Symbolic Z-matrix:
 Charge =  0 Multiplicity = 1
 C                     5.05585   0.08558  -0.00008 
 C                     4.01605   0.99846  -0.00008 
 C                     2.68054   0.56215  -0.00004 
 C                     2.40767  -0.82638   0.00002 
 C                     3.47739  -1.73796   0.00004 
 C                     4.78598  -1.29207  -0.00002 
 H                     6.08213   0.43576  -0.00013 
 H                     4.20999   2.0637   -0.00013 
 H                     3.24705  -2.79612   0.00009 
 H                     5.60312  -2.00462  -0.00002 
 C                     1.03016  -1.34878   0.00006 
 O                     0.7817   -2.56477   0.00012 
 C                     1.60322   1.55636  -0.00004 
 C                    -0.04477  -0.35573   0.00001 
 C                     0.25429   1.08904   0.00007 
 C                    -1.3626   -0.76975   0. 
 C                    -0.83927   2.02951   0.00019 
 C                    -2.39369   0.17428   0.00006 
 H                    -1.57618  -1.83065  -0.00003 
 C                    -2.12517   1.60071   0.0002 
 H                    -0.59759   3.08348   0.00027 
 H                    -2.95405   2.29583   0.0003 
 Br                   -4.17887  -0.39325  -0.00008 
 O                     1.83982   2.80524  -0.00011 
 
 NAtoms=     24 NQM=       24 NQMF=       0 NMMI=      0 NMMIF=      0
                NMic=       0 NMicF=      0.
                    Isotopes and Nuclear Properties:
 (Nuclear quadrupole moments (NQMom) in fm**2, nuclear magnetic moments (NMagM)
  in nuclear magnetons)

  Atom         1           2           3           4           5           6           7           8           9          10
 IAtWgt=          12          12          12          12          12          12           1           1           1           1
 AtmWgt=  12.0000000  12.0000000  12.0000000  12.0000000  12.0000000  12.0000000   1.0078250   1.0078250   1.0078250   1.0078250
 NucSpn=           0           0           0           0           0           0           1           1           1           1
 AtZEff=   0.0000000   0.0000000   0.0000000   0.0000000   0.0000000   0.0000000   0.0000000   0.0000000   0.0000000   0.0000000
 NQMom=    0.0000000   0.0000000   0.0000000   0.0000000   0.0000000   0.0000000   0.0000000   0.0000000   0.0000000   0.0000000
 NMagM=    0.0000000   0.0000000   0.0000000   0.0000000   0.0000000   0.0000000   2.7928460   2.7928460   2.7928460   2.7928460
 AtZNuc=   6.0000000   6.0000000   6.0000000   6.0000000   6.0000000   6.0000000   1.0000000   1.0000000   1.0000000   1.0000000

  Atom        11          12          13          14          15          16          17          18          19          20
 IAtWgt=          12          16          12          12          12          12          12          12           1          12
 AtmWgt=  12.0000000  15.9949146  12.0000000  12.0000000  12.0000000  12.0000000  12.0000000  12.0000000   1.0078250  12.0000000
 NucSpn=           0           0           0           0           0           0           0           0           1           0
 AtZEff=   0.0000000   0.0000000   0.0000000   0.0000000   0.0000000   0.0000000   0.0000000   0.0000000   0.0000000   0.0000000
 NQMom=    0.0000000   0.0000000   0.0000000   0.0000000   0.0000000   0.0000000   0.0000000   0.0000000   0.0000000   0.0000000
 NMagM=    0.0000000   0.0000000   0.0000000   0.0000000   0.0000000   0.0000000   0.0000000   0.0000000   2.7928460   0.0000000
 AtZNuc=   6.0000000   8.0000000   6.0000000   6.0000000   6.0000000   6.0000000   6.0000000   6.0000000   1.0000000   6.0000000

  Atom        21          22          23          24
 IAtWgt=           1           1          79          16
 AtmWgt=   1.0078250   1.0078250  78.9183361  15.9949146
 NucSpn=           1           1           3           0
 AtZEff=   0.0000000   0.0000000   0.0000000   0.0000000
 NQMom=    0.0000000   0.0000000  31.3000000   0.0000000
 NMagM=    2.7928460   2.7928460   2.1063990   0.0000000
 AtZNuc=   1.0000000   1.0000000  35.0000000   8.0000000
 Leave Link  101 at Wed Jan 15 22:34:28 2020, MaxMem=   134217728 cpu:         0.0
 (Enter E:\Gaussian\G09W\l202.exe)
                          Input orientation:                          
 ---------------------------------------------------------------------
 Center     Atomic      Atomic             Coordinates (Angstroms)
 Number     Number       Type             X           Y           Z
 ---------------------------------------------------------------------
      1          6           0        5.055850    0.085583   -0.000075
      2          6           0        4.016053    0.998456   -0.000081
      3          6           0        2.680535    0.562151   -0.000035
      4          6           0        2.407672   -0.826375    0.000020
      5          6           0        3.477394   -1.737963    0.000038
      6          6           0        4.785978   -1.292074   -0.000018
      7          1           0        6.082126    0.435757   -0.000130
      8          1           0        4.209986    2.063698   -0.000129
      9          1           0        3.247053   -2.796117    0.000085
     10          1           0        5.603116   -2.004625   -0.000016
     11          6           0        1.030160   -1.348775    0.000055
     12          8           0        0.781701   -2.564765    0.000118
     13          6           0        1.603219    1.556363   -0.000039
     14          6           0       -0.044765   -0.355729    0.000013
     15          6           0        0.254288    1.089038    0.000074
     16          6           0       -1.362596   -0.769750    0.000000
     17          6           0       -0.839272    2.029511    0.000186
     18          6           0       -2.393691    0.174281    0.000059
     19          1           0       -1.576183   -1.830651   -0.000025
     20          6           0       -2.125167    1.600705    0.000198
     21          1           0       -0.597591    3.083479    0.000271
     22          1           0       -2.954046    2.295834    0.000296
     23         35           0       -4.178873   -0.393248   -0.000079
     24          8           0        1.839819    2.805239   -0.000114
 ---------------------------------------------------------------------
                    Distance matrix (angstroms):
                    1          2          3          4          5
     1  C    0.000000
     2  C    1.383660   0.000000
     3  C    2.422651   1.404981   0.000000
     4  C    2.800806   2.432467   1.415083   0.000000
     5  C    2.411813   2.788932   2.434237   1.405453   0.000000
     6  C    1.403841   2.416467   2.805537   2.423472   1.382465
     7  H    1.084373   2.141329   3.403938   3.885176   3.392593
     8  H    2.151377   1.082751   2.143330   3.406003   3.871604
     9  H    3.402344   3.871711   3.405717   2.141131   1.082934
    10  H    2.160664   3.396655   3.889707   3.405750   2.142382
    11  C    4.273589   3.798032   2.524951   1.473242   2.477987
    12  O    5.029184   4.812232   3.658302   2.380290   2.819639
    13  C    3.752846   2.476495   1.465970   2.514873   3.790134
    14  C    5.119671   4.280661   2.875720   2.497189   3.783672
    15  C    4.905295   3.762855   2.482798   2.881991   4.287231
    16  C    6.475187   5.661839   4.256861   3.770693   4.935883
    17  C    6.207360   4.963593   3.813422   4.324203   5.729526
    18  C    7.450069   6.462514   5.089029   4.904528   6.174651
    19  H    6.903319   6.267133   4.883150   4.108488   5.054427
    20  C    7.339114   6.170680   4.916642   5.141726   6.521916
    21  H    6.399123   5.062907   4.135602   4.931386   6.312829
    22  H    8.309250   7.089815   5.895266   6.204531   7.591768
    23  Br   9.247129   8.312259   6.925624   6.600771   7.773460
    24  O    4.211815   2.828508   2.395464   3.675742   4.829320
                    6          7          8          9         10
     6  C    0.000000
     7  H    2.159954   0.000000
     8  H    3.404845   2.480947   0.000000
     9  H    2.151845   4.299145   4.954295   0.000000
    10  H    1.084179   2.486949   4.300240   2.485456   0.000000
    11  C    3.756246   5.357883   4.664361   2.647530   4.619747
    12  O    4.201664   6.090783   5.759844   2.476183   4.853844
    13  C    4.271247   4.616965   2.655678   4.652555   5.355354
    14  C    4.920652   6.177802   4.894541   4.097751   5.883657
    15  C    5.119171   5.864339   4.074004   4.904189   6.179054
    16  C    6.170720   7.541693   6.251568   5.035378   7.074324
    17  C    6.532715   7.102521   5.049374   6.323349   7.601225
    18  C    7.327881   8.479849   6.868657   6.375050   8.288338
    19  H    6.384916   7.986633   6.974647   4.918916   7.181407
    20  C    7.492136   8.289557   6.352049   6.942103   8.527881
    21  H    6.937455   7.185336   4.914545   7.025022   8.021070
    22  H    8.531181   9.225632   7.167792   8.023814   9.577002
    23  Br   9.009797  10.294433   8.741255   7.805008   9.913821
    24  O    5.046566   4.859178   2.483460   5.775422   6.107143
                   11         12         13         14         15
    11  C    0.000000
    12  O    1.241114   0.000000
    13  C    2.961119   4.202212   0.000000
    14  C    1.463422   2.358577   2.524272   0.000000
    15  C    2.558302   3.691672   1.427588   1.475393   0.000000
    16  C    2.461819   2.796442   3.769199   1.381337   2.463617
    17  C    3.861035   4.871850   2.487897   2.514083   1.442346
    18  C    3.747326   4.193505   4.229118   2.407979   2.801531
    19  H    2.650515   2.469522   4.645477   2.126179   3.446042
    20  C    4.319204   5.079471   3.728650   2.855820   2.433847
    21  H    4.721700   5.814216   2.678740   3.483356   2.168754
    22  H    5.399729   6.130353   4.616869   3.936331   3.427793
    23  Br   5.295947   5.415051   6.101932   4.134278   4.674408
    24  O    4.232184   5.473258   1.271090   3.680133   2.336505
                   16         17         18         19         20
    16  C    0.000000
    17  C    2.847759   0.000000
    18  C    1.397981   2.420351   0.000000
    19  H    1.082188   3.929871   2.165196   0.000000
    20  C    2.490095   1.355507   1.451479   3.474995   0.000000
    21  H    3.928436   1.081322   3.418978   5.010620   2.128875
    22  H    3.454058   2.131478   2.194307   4.350447   1.081779
    23  Br   2.841332   4.125857   1.873223   2.973234   2.862439
    24  O    4.799584   2.789137   4.984430   5.758519   4.143913
                   21         22         23         24
    21  H    0.000000
    22  H    2.484606   0.000000
    23  Br   4.991314   2.954888   0.000000
    24  O    2.453240   4.820854   6.815788   0.000000
 Stoichiometry    C14H7BrO2
 Framework group  C1[X(C14H7BrO2)]
 Deg. of freedom    66
 Full point group                 C1      NOp   1
 Largest Abelian subgroup         C1      NOp   1
 Largest concise Abelian subgroup C1      NOp   1
                         Standard orientation:                         
 ---------------------------------------------------------------------
 Center     Atomic      Atomic             Coordinates (Angstroms)
 Number     Number       Type             X           Y           Z
 ---------------------------------------------------------------------
      1          6           0        5.055850    0.085583   -0.000075
      2          6           0        4.016053    0.998456   -0.000081
      3          6           0        2.680535    0.562151   -0.000035
      4          6           0        2.407672   -0.826375    0.000020
      5          6           0        3.477394   -1.737963    0.000038
      6          6           0        4.785978   -1.292074   -0.000018
      7          1           0        6.082126    0.435757   -0.000130
      8          1           0        4.209986    2.063698   -0.000129
      9          1           0        3.247053   -2.796117    0.000085
     10          1           0        5.603116   -2.004625   -0.000016
     11          6           0        1.030160   -1.348775    0.000055
     12          8           0        0.781701   -2.564765    0.000118
     13          6           0        1.603219    1.556363   -0.000039
     14          6           0       -0.044765   -0.355729    0.000013
     15          6           0        0.254288    1.089038    0.000074
     16          6           0       -1.362596   -0.769750    0.000000
     17          6           0       -0.839272    2.029511    0.000186
     18          6           0       -2.393691    0.174281    0.000059
     19          1           0       -1.576183   -1.830651   -0.000025
     20          6           0       -2.125167    1.600705    0.000198
     21          1           0       -0.597591    3.083479    0.000271
     22          1           0       -2.954046    2.295834    0.000296
     23         35           0       -4.178873   -0.393248   -0.000079
     24          8           0        1.839819    2.805239   -0.000114
 ---------------------------------------------------------------------
 Rotational constants (GHZ):      0.9867611      0.1794396      0.1518298
 Leave Link  202 at Wed Jan 15 22:34:28 2020, MaxMem=   134217728 cpu:         0.0
 (Enter E:\Gaussian\G09W\l301.exe)
 General basis read from cards:  (5D, 7F)
 Centers:       7      8      9     10     19     21     22
 S 3 1.00
     Exponent=  3.4061341000D+01 Coefficients=  6.0251978000D-03
     Exponent=  5.1235746000D+00 Coefficients=  4.5021094000D-02
     Exponent=  1.1646626000D+00 Coefficients=  2.0189726000D-01
 S 1 1.00
     Exponent=  3.2723041000D-01 Coefficients=  1.0000000000D+00
 S 1 1.00
     Exponent=  1.0307241000D-01 Coefficients=  1.0000000000D+00
 P 1 1.00
     Exponent=  8.0000000000D-01 Coefficients=  1.0000000000D+00
 ****
 Centers:       1      2      3      4      5      6     11     13     14     15
 Centers:      16     17     18     20
 S 6 1.00
     Exponent=  1.3575349682D+04 Coefficients=  2.2245814352D-04
     Exponent=  2.0352333680D+03 Coefficients=  1.7232738252D-03
     Exponent=  4.6322562359D+02 Coefficients=  8.9255715314D-03
     Exponent=  1.3120019598D+02 Coefficients=  3.5727984502D-02
     Exponent=  4.2853015891D+01 Coefficients=  1.1076259931D-01
     Exponent=  1.5584185766D+01 Coefficients=  2.4295627626D-01
 S 2 1.00
     Exponent=  6.2067138508D+00 Coefficients=  4.1440263448D-01
     Exponent=  2.5764896527D+00 Coefficients=  2.3744968655D-01
 S 1 1.00
     Exponent=  5.7696339419D-01 Coefficients=  1.0000000000D+00
 S 1 1.00
     Exponent=  2.2972831358D-01 Coefficients=  1.0000000000D+00
 S 1 1.00
     Exponent=  9.5164440028D-02 Coefficients=  1.0000000000D+00
 P 4 1.00
     Exponent=  3.4697232244D+01 Coefficients=  5.3333657805D-03
     Exponent=  7.9582622826D+00 Coefficients=  3.5864109092D-02
     Exponent=  2.3780826883D+00 Coefficients=  1.4215873329D-01
     Exponent=  8.1433208183D-01 Coefficients=  3.4270471845D-01
 P 1 1.00
     Exponent=  2.8887547253D-01 Coefficients=  4.6445822433D-01
 P 1 1.00
     Exponent=  1.0056823671D-01 Coefficients=  2.4955789874D-01
 D 1 1.00
     Exponent=  1.0970000000D+00 Coefficients=  1.0000000000D+00
 D 1 1.00
     Exponent=  3.1800000000D-01 Coefficients=  1.0000000000D+00
 F 1 1.00
     Exponent=  7.6100000000D-01 Coefficients=  1.0000000000D+00
 ****
 Centers:      12     24
 S 6 1.00
     Exponent=  2.7032382631D+04 Coefficients=  2.1726302465D-04
     Exponent=  4.0523871392D+03 Coefficients=  1.6838662199D-03
     Exponent=  9.2232722710D+02 Coefficients=  8.7395616265D-03
     Exponent=  2.6124070989D+02 Coefficients=  3.5239968808D-02
     Exponent=  8.5354641351D+01 Coefficients=  1.1153519115D-01
     Exponent=  3.1035035245D+01 Coefficients=  2.5588953961D-01
 S 2 1.00
     Exponent=  1.2260860728D+01 Coefficients=  3.9768730901D-01
     Exponent=  4.9987076005D+00 Coefficients=  2.4627849430D-01
 S 1 1.00
     Exponent=  1.1703108158D+00 Coefficients=  1.0000000000D+00
 S 1 1.00
     Exponent=  4.6474740994D-01 Coefficients=  1.0000000000D+00
 S 1 1.00
     Exponent=  1.8504536357D-01 Coefficients=  1.0000000000D+00
 P 4 1.00
     Exponent=  6.3274954801D+01 Coefficients=  6.0685103418D-03
     Exponent=  1.4627049379D+01 Coefficients=  4.1912575824D-02
     Exponent=  4.4501223456D+00 Coefficients=  1.6153841088D-01
     Exponent=  1.5275799647D+00 Coefficients=  3.5706951311D-01
 P 1 1.00
     Exponent=  5.2935117943D-01 Coefficients=  4.4794207502D-01
 P 1 1.00
     Exponent=  1.7478421270D-01 Coefficients=  2.4446069663D-01
 D 1 1.00
     Exponent=  2.3140000000D+00 Coefficients=  1.0000000000D+00
 D 1 1.00
     Exponent=  6.4500000000D-01 Coefficients=  1.0000000000D+00
 F 1 1.00
     Exponent=  1.4280000000D+00 Coefficients=  1.0000000000D+00
 ****
 Centers:      23
 S 8 1.00
     Exponent=  5.6507325256D+05 Coefficients=  2.3660314690D-04
     Exponent=  8.4701723179D+04 Coefficients=  1.8348332508D-03
     Exponent=  1.9276271900D+04 Coefficients=  9.5465849860D-03
     Exponent=  5.4564284576D+03 Coefficients=  3.8877142153D-02
     Exponent=  1.7769503500D+03 Coefficients=  1.2718314231D-01
     Exponent=  6.3919398276D+02 Coefficients=  3.0437662191D-01
     Exponent=  2.4878823961D+02 Coefficients=  4.4490940497D-01
     Exponent=  9.8678305494D+01 Coefficients=  2.4381643058D-01
 S 4 1.00
     Exponent=  6.0607824568D+02 Coefficients= -2.6527158709D-02
     Exponent=  1.8845598484D+02 Coefficients= -1.2484584809D-01
     Exponent=  3.1497144506D+01 Coefficients=  5.6468683559D-01
     Exponent=  1.3736008320D+01 Coefficients=  5.5555268564D-01
 S 2 1.00
     Exponent=  2.1203212766D+01 Coefficients= -2.4940920493D-01
     Exponent=  3.7616420178D+00 Coefficients=  7.1213119743D-01
 S 1 1.00
     Exponent=  1.7735933962D+00 Coefficients=  1.0000000000D+00
 S 1 1.00
     Exponent=  4.5197413664D-01 Coefficients=  1.0000000000D+00
 S 1 1.00
     Exponent=  1.6613377099D-01 Coefficients=  1.0000000000D+00
 P 6 1.00
     Exponent=  3.0196955723D+03 Coefficients=  2.4971049798D-03
     Exponent=  7.1535481126D+02 Coefficients=  2.0419267596D-02
     Exponent=  2.2998328751D+02 Coefficients=  9.6897148309D-02
     Exponent=  8.6167844615D+01 Coefficients=  2.8053901252D-01
     Exponent=  3.4667870802D+01 Coefficients=  4.4606390473D-01
     Exponent=  1.4113870307D+01 Coefficients=  2.4410073923D-01
 P 4 1.00
     Exponent=  5.7085653082D+01 Coefficients= -2.1855950710D-02
     Exponent=  8.8193845840D+00 Coefficients=  3.2707075320D-01
     Exponent=  3.9340302872D+00 Coefficients=  5.7855229520D-01
     Exponent=  1.7998830384D+00 Coefficients=  3.3570987698D-01
 P 1 1.00
     Exponent=  6.6899410512D-01 Coefficients=  1.0000000000D+00
 P 1 1.00
     Exponent=  2.7136238231D-01 Coefficients=  1.0000000000D+00
 P 1 1.00
     Exponent=  1.0083790243D-01 Coefficients=  1.0000000000D+00
 D 5 1.00
     Exponent=  1.6885370257D+02 Coefficients=  8.9663981988D-03
     Exponent=  4.9977949919D+01 Coefficients=  6.2062059316D-02
     Exponent=  1.8274913338D+01 Coefficients=  2.1474732384D-01
     Exponent=  7.2455694631D+00 Coefficients=  4.0335336746D-01
     Exponent=  2.8562315025D+00 Coefficients=  4.2208813080D-01
 D 1 1.00
     Exponent=  1.0459621144D+00 Coefficients=  1.7874813267D-01
 D 1 1.00
     Exponent=  5.6865655000D-01 Coefficients=  1.0000000000D+00
 D 1 1.00
     Exponent=  2.2031490000D-01 Coefficients=  1.0000000000D+00
 F 1 1.00
     Exponent=  5.7083312000D-01 Coefficients=  1.0000000000D+00
 ****
 Ernie: Thresh=  0.10000D-02 Tol=  0.10000D-05 Strict=F.
 There are   673 symmetry adapted cartesian basis functions of A   symmetry.
 There are   586 symmetry adapted basis functions of A   symmetry.
   586 basis functions,   986 primitive gaussians,   673 cartesian basis functions
    71 alpha electrons       71 beta electrons
       nuclear repulsion energy      1373.5559806678 Hartrees.
 IExCor= 4336 DFT=T Ex+Corr=M062X ExCW=0 ScaHFX=  0.540000
 ScaDFX=  1.000000  1.000000  1.000000  1.000000 ScalE2=  1.000000  1.000000
 IRadAn=      0 IRanWt=     -1 IRanGd=            0 ICorTp=0 IEmpDi=131
 NAtoms=   24 NActive=   24 NUniq=   24 SFac= 1.00D+00 NAtFMM=   60 NAOKFM=F Big=F
 Integral buffers will be    262144 words long.
 Regular integral format.
 Two-electron integral symmetry is turned on.
 R6Disp:  Grimme-D3 Dispersion energy=       -0.0011132888 Hartrees.
 Nuclear repulsion after empirical dispersion term =     1373.5548673790 Hartrees.
 Using the following non-standard input for PCM:
 --- end of non-standard input.
 ------------------------------------------------------------------------------
 Polarizable Continuum Model (PCM)
 =================================
 Model                : PCM (using non-symmetric T matrix).
 Atomic radii         : UFF (Universal Force Field).
 Polarization charges : Total charges.
 Charge compensation  : None.
 Solution method      : On-the-fly selection.
 Cavity type          : Scaled VdW (van der Waals Surface) (Alpha=1.100).
 Cavity algorithm     : GePol (No added spheres)
                        Default sphere list used, NSphG=   24.
                        Lebedev-Laikov grids with approx.  5.0 points / Ang**2.
                        Smoothing algorithm: Karplus/York (Gamma=1.0000).
                        Polarization charges: spherical gaussians, with
                                              point-specific exponents (IZeta= 3).
                        Self-potential: point-specific (ISelfS= 7).
                        Self-field    : sphere-specific E.n sum rule (ISelfD= 2).
 Solvent              : Acetonitrile, Eps=  35.688000 Eps(inf)=   1.806874
 ------------------------------------------------------------------------------
 GePol: Number of generator spheres                  =      24
 GePol: Total number of spheres                      =      24
 GePol: Number of exposed spheres                    =      24 (100.00%)
 GePol: Number of points                             =    2169
 GePol: Average weight of points                     =       0.13
 GePol: Minimum weight of points                     =   0.23D-10
 GePol: Maximum weight of points                     =    0.20577
 GePol: Number of points with low weight             =     132
 GePol: Fraction of low-weight points (<1% of avg)   =       6.09%
 GePol: Cavity surface area                          =    279.838 Ang**2
 GePol: Cavity volume                                =    306.095 Ang**3
 Leave Link  301 at Wed Jan 15 22:34:31 2020, MaxMem=   134217728 cpu:         2.0
 (Enter E:\Gaussian\G09W\l302.exe)
 NPDir=0 NMtPBC=     1 NCelOv=     1 NCel=       1 NClECP=     1 NCelD=      1
         NCelK=      1 NCelE2=     1 NClLst=     1 CellRange=     0.0.
 One-electron integrals computed using PRISM.
 NBasis=   586 RedAO= T EigKep=  6.29D-06  NBF=   586
 NBsUse=   586 1.00D-06 EigRej= -1.00D+00 NBFU=   586
 Precomputing XC quadrature grid using
 IXCGrd= 4 IRadAn=           0 IRanWt=          -1 IRanGd=           0 AccXCQ= 0.00D+00.
 Generated NRdTot=       0 NPtTot=           0 NUsed=           0 NTot=          16
 NSgBfM=   657   657   657   657   657 MxSgAt=    24 MxSgA2=    24.
 Leave Link  302 at Wed Jan 15 22:34:40 2020, MaxMem=   134217728 cpu:         8.0
 (Enter E:\Gaussian\G09W\l308.exe)
 Leave Link  308 at Wed Jan 15 22:34:42 2020, MaxMem=   134217728 cpu:         2.0
 (Enter E:\Gaussian\G09W\l303.exe)
 DipDrv:  MaxL=1.
 Leave Link  303 at Wed Jan 15 22:34:43 2020, MaxMem=   134217728 cpu:         1.0
 (Enter E:\Gaussian\G09W\l401.exe)
 ExpMin= 9.52D-02 ExpMax= 5.65D+05 ExpMxC= 5.46D+03 IAcc=2 IRadAn=         4 AccDes= 0.00D+00
 Harris functional with IExCor= 1009 and IRadAn=       4 diagonalized for initial guess.
 HarFok:  IExCor= 1009 AccDes= 0.00D+00 IRadAn=         4 IDoV= 1 UseB2=F ITyADJ=14
 ICtDFT=  3500011 ScaDFX=  1.000000  1.000000  1.000000  1.000000
 FoFCou: FMM=F IPFlag=           0 FMFlag=      100000 FMFlg1=           0
         NFxFlg=           0 DoJE=T BraDBF=F KetDBF=T FulRan=T
         wScrn=  0.000000 ICntrl=     500 IOpCl=  0 I1Cent=   200000004 NGrid=           0
         NMat0=    1 NMatS0=      1 NMatT0=    0 NMatD0=    1 NMtDS0=    0 NMtDT0=    0
 Petite list used in FoFCou.
 Harris En= -3261.54303433650    
 JPrj=0 DoOrth=F DoCkMO=F.
 Leave Link  401 at Wed Jan 15 22:35:29 2020, MaxMem=   134217728 cpu:        45.0
 (Enter E:\Gaussian\G09W\l502.exe)
 Closed shell SCF:
 Using DIIS extrapolation, IDIIS=  1040.
 Integral symmetry usage will be decided dynamically.
 IVT=     1385392 IEndB=     1385392 NGot=   134217728 MDV=   133302579
 LenX=   133302579 LenY=   132848977
 Requested convergence on RMS density matrix=1.00D-08 within 128 cycles.
 Requested convergence on MAX density matrix=1.00D-06.
 Requested convergence on             energy=1.00D-06.
 No special actions if energy rises.
 Fock matrices will be formed incrementally for  20 cycles.

 Cycle   1  Pass 1  IDiag  1:
 FoFJK:  IHMeth= 1 ICntrl=       0 DoSepK=F KAlg= 0 I1Cent=   0 FoldK=F
 IRaf= 830000000 NMat=   1 IRICut=       1 DoRegI=T DoRafI=F ISym2E= 0.
 FoFCou: FMM=F IPFlag=           0 FMFlag=      100000 FMFlg1=           0
         NFxFlg=           0 DoJE=F BraDBF=F KetDBF=F FulRan=T
         wScrn=  0.000000 ICntrl=       0 IOpCl=  0 I1Cent=           0 NGrid=           0
         NMat0=    1 NMatS0=      1 NMatT0=    0 NMatD0=    1 NMtDS0=    0 NMtDT0=    0
 Symmetry not used in FoFCou.
 Inv3:  Mode=1 IEnd=    14113683.
 Iteration    1 A*A^-1 deviation from unit magnitude is 2.44D-15 for   1454.
 Iteration    1 A*A^-1 deviation from orthogonality  is 2.33D-15 for   1454   1267.
 Iteration    1 A^-1*A deviation from unit magnitude is 2.22D-15 for   2071.
 Iteration    1 A^-1*A deviation from orthogonality  is 1.48D-13 for   1542   1528.
 E= -3261.99072646975    
 DIIS: error= 2.94D-02 at cycle   1 NSaved=   1.
 NSaved= 1 IEnMin= 1 EnMin= -3261.99072646975     IErMin= 1 ErrMin= 2.94D-02
 ErrMax= 2.94D-02  0.00D+00 EMaxC= 1.00D-01 BMatC= 6.60D-01 BMatP= 6.60D-01
 IDIUse=3 WtCom= 7.06D-01 WtEn= 2.94D-01
 Coeff-Com:  0.100D+01
 Coeff-En:   0.100D+01
 Coeff:      0.100D+01
 Gap=     0.233 Goal=   None    Shift=    0.000
 GapD=    0.233 DampG=1.000 DampE=0.500 DampFc=0.5000 IDamp=-1.
 Damping current iteration by 5.00D-01
 RMSDP=6.41D-03 MaxDP=4.27D-01              OVMax= 1.68D-01

 Cycle   2  Pass 1  IDiag  1:
 RMSU=  3.20D-03    CP:  1.02D+00
 E= -3262.15800903890     Delta-E=       -0.167282569154 Rises=F Damp=T
 DIIS: error= 8.04D-03 at cycle   2 NSaved=   2.
 NSaved= 2 IEnMin= 2 EnMin= -3262.15800903890     IErMin= 2 ErrMin= 8.04D-03
 ErrMax= 8.04D-03  0.00D+00 EMaxC= 1.00D-01 BMatC= 6.36D-02 BMatP= 6.60D-01
 IDIUse=3 WtCom= 9.20D-01 WtEn= 8.04D-02
 Coeff-Com: -0.105D+00 0.111D+01
 Coeff-En:   0.000D+00 0.100D+01
 Coeff:     -0.967D-01 0.110D+01
 Gap=     0.270 Goal=   None    Shift=    0.000
 RMSDP=2.14D-03 MaxDP=1.49D-01 DE=-1.67D-01 OVMax= 1.69D-01

 Cycle   3  Pass 1  IDiag  1:
 RMSU=  1.62D-03    CP:  9.81D-01  5.81D-01
 E= -3262.30170452227     Delta-E=       -0.143695483369 Rises=F Damp=F
 DIIS: error= 1.24D-02 at cycle   3 NSaved=   3.
 NSaved= 3 IEnMin= 3 EnMin= -3262.30170452227     IErMin= 2 ErrMin= 8.04D-03
 ErrMax= 1.24D-02  0.00D+00 EMaxC= 1.00D-01 BMatC= 5.16D-02 BMatP= 6.36D-02
 IDIUse=3 WtCom= 8.76D-01 WtEn= 1.24D-01
 Coeff-Com: -0.143D+00 0.578D+00 0.565D+00
 Coeff-En:   0.000D+00 0.000D+00 0.100D+01
 Coeff:     -0.125D+00 0.506D+00 0.619D+00
 Gap=     0.202 Goal=   None    Shift=    0.000
 RMSDP=7.75D-04 MaxDP=6.38D-02 DE=-1.44D-01 OVMax= 7.88D-02

 Cycle   4  Pass 1  IDiag  1:
 RMSU=  4.48D-04    CP:  9.89D-01  7.59D-01  8.42D-01
 E= -3262.33412086791     Delta-E=       -0.032416345639 Rises=F Damp=F
 DIIS: error= 6.17D-03 at cycle   4 NSaved=   4.
 NSaved= 4 IEnMin= 4 EnMin= -3262.33412086791     IErMin= 4 ErrMin= 6.17D-03
 ErrMax= 6.17D-03  0.00D+00 EMaxC= 1.00D-01 BMatC= 1.02D-02 BMatP= 5.16D-02
 IDIUse=3 WtCom= 9.38D-01 WtEn= 6.17D-02
 Coeff-Com: -0.383D-01 0.992D-01 0.344D+00 0.595D+00
 Coeff-En:   0.000D+00 0.000D+00 0.183D+00 0.817D+00
 Coeff:     -0.360D-01 0.931D-01 0.334D+00 0.609D+00
 Gap=     0.203 Goal=   None    Shift=    0.000
 RMSDP=3.59D-04 MaxDP=2.87D-02 DE=-3.24D-02 OVMax= 2.52D-02

 Cycle   5  Pass 1  IDiag  1:
 RMSU=  9.53D-05    CP:  9.85D-01  6.70D-01  9.18D-01  6.71D-01
 E= -3262.34209351913     Delta-E=       -0.007972651215 Rises=F Damp=F
 DIIS: error= 4.62D-04 at cycle   5 NSaved=   5.
 NSaved= 5 IEnMin= 5 EnMin= -3262.34209351913     IErMin= 5 ErrMin= 4.62D-04
 ErrMax= 4.62D-04  0.00D+00 EMaxC= 1.00D-01 BMatC= 1.72D-04 BMatP= 1.02D-02
 IDIUse=3 WtCom= 9.95D-01 WtEn= 4.62D-03
 Coeff-Com: -0.571D-02 0.886D-02 0.100D+00 0.246D+00 0.651D+00
 Coeff-En:   0.000D+00 0.000D+00 0.000D+00 0.000D+00 0.100D+01
 Coeff:     -0.568D-02 0.882D-02 0.995D-01 0.244D+00 0.653D+00
 Gap=     0.204 Goal=   None    Shift=    0.000
 RMSDP=4.84D-05 MaxDP=3.92D-03 DE=-7.97D-03 OVMax= 3.35D-03

 Cycle   6  Pass 1  IDiag  1:
 RMSU=  2.46D-05    CP:  9.85D-01  6.81D-01  9.12D-01  7.02D-01  8.30D-01
 E= -3262.34224683260     Delta-E=       -0.000153313471 Rises=F Damp=F
 DIIS: error= 1.17D-04 at cycle   6 NSaved=   6.
 NSaved= 6 IEnMin= 6 EnMin= -3262.34224683260     IErMin= 6 ErrMin= 1.17D-04
 ErrMax= 1.17D-04  0.00D+00 EMaxC= 1.00D-01 BMatC= 1.02D-05 BMatP= 1.72D-04
 IDIUse=3 WtCom= 9.99D-01 WtEn= 1.17D-03
 Coeff-Com:  0.117D-02-0.465D-02 0.120D-01 0.486D-01 0.247D+00 0.696D+00
 Coeff-En:   0.000D+00 0.000D+00 0.000D+00 0.000D+00 0.000D+00 0.100D+01
 Coeff:      0.117D-02-0.464D-02 0.120D-01 0.486D-01 0.246D+00 0.697D+00
 Gap=     0.204 Goal=   None    Shift=    0.000
 RMSDP=3.05D-05 MaxDP=2.08D-03 DE=-1.53D-04 OVMax= 8.52D-04

 Cycle   7  Pass 1  IDiag  1:
 RMSU=  1.13D-05    CP:  9.85D-01  6.72D-01  9.15D-01  7.06D-01  8.79D-01
                    CP:  1.01D+00
 E= -3262.34225657108     Delta-E=       -0.000009738479 Rises=F Damp=F
 DIIS: error= 5.80D-05 at cycle   7 NSaved=   7.
 NSaved= 7 IEnMin= 7 EnMin= -3262.34225657108     IErMin= 7 ErrMin= 5.80D-05
 ErrMax= 5.80D-05  0.00D+00 EMaxC= 1.00D-01 BMatC= 1.51D-06 BMatP= 1.02D-05
 IDIUse=1 WtCom= 1.00D+00 WtEn= 0.00D+00
 Coeff-Com:  0.112D-02-0.300D-02-0.645D-02-0.103D-01 0.255D-01 0.273D+00
 Coeff-Com:  0.720D+00
 Coeff:      0.112D-02-0.300D-02-0.645D-02-0.103D-01 0.255D-01 0.273D+00
 Coeff:      0.720D+00
 Gap=     0.204 Goal=   None    Shift=    0.000
 RMSDP=8.32D-06 MaxDP=4.38D-04 DE=-9.74D-06 OVMax= 6.51D-04

 Cycle   8  Pass 1  IDiag  1:
 RMSU=  4.57D-06    CP:  9.85D-01  6.70D-01  9.16D-01  7.09D-01  8.98D-01
                    CP:  1.08D+00  9.86D-01
 E= -3262.34225821562     Delta-E=       -0.000001644545 Rises=F Damp=F
 DIIS: error= 2.25D-05 at cycle   8 NSaved=   8.
 NSaved= 8 IEnMin= 8 EnMin= -3262.34225821562     IErMin= 8 ErrMin= 2.25D-05
 ErrMax= 2.25D-05  0.00D+00 EMaxC= 1.00D-01 BMatC= 4.39D-07 BMatP= 1.51D-06
 IDIUse=1 WtCom= 1.00D+00 WtEn= 0.00D+00
 Coeff-Com:  0.315D-03-0.622D-03-0.492D-02-0.139D-01-0.276D-01 0.101D-01
 Coeff-Com:  0.380D+00 0.657D+00
 Coeff:      0.315D-03-0.622D-03-0.492D-02-0.139D-01-0.276D-01 0.101D-01
 Coeff:      0.380D+00 0.657D+00
 Gap=     0.204 Goal=   None    Shift=    0.000
 RMSDP=4.95D-06 MaxDP=3.36D-04 DE=-1.64D-06 OVMax= 3.29D-04

 Cycle   9  Pass 1  IDiag  1:
 RMSU=  1.52D-06    CP:  9.85D-01  6.69D-01  9.16D-01  7.08D-01  9.09D-01
                    CP:  1.11D+00  1.18D+00  7.30D-01
 E= -3262.34225867147     Delta-E=       -0.000000455846 Rises=F Damp=F
 DIIS: error= 6.96D-06 at cycle   9 NSaved=   9.
 NSaved= 9 IEnMin= 9 EnMin= -3262.34225867147     IErMin= 9 ErrMin= 6.96D-06
 ErrMax= 6.96D-06  0.00D+00 EMaxC= 1.00D-01 BMatC= 3.44D-08 BMatP= 4.39D-07
 IDIUse=1 WtCom= 1.00D+00 WtEn= 0.00D+00
 Coeff-Com:  0.168D-04 0.559D-04-0.107D-02-0.421D-02-0.122D-01-0.308D-01
 Coeff-Com:  0.610D-01 0.226D+00 0.761D+00
 Coeff:      0.168D-04 0.559D-04-0.107D-02-0.421D-02-0.122D-01-0.308D-01
 Coeff:      0.610D-01 0.226D+00 0.761D+00
 Gap=     0.204 Goal=   None    Shift=    0.000
 RMSDP=2.16D-06 MaxDP=1.20D-04 DE=-4.56D-07 OVMax= 1.72D-04

 Cycle  10  Pass 1  IDiag  1:
 RMSU=  4.75D-07    CP:  9.85D-01  6.69D-01  9.16D-01  7.08D-01  9.11D-01
                    CP:  1.11D+00  1.21D+00  8.63D-01  1.04D+00
 E= -3262.34225872299     Delta-E=       -0.000000051520 Rises=F Damp=F
 DIIS: error= 4.21D-06 at cycle  10 NSaved=  10.
 NSaved=10 IEnMin=10 EnMin= -3262.34225872299     IErMin=10 ErrMin= 4.21D-06
 ErrMax= 4.21D-06  0.00D+00 EMaxC= 1.00D-01 BMatC= 8.03D-09 BMatP= 3.44D-08
 IDIUse=1 WtCom= 1.00D+00 WtEn= 0.00D+00
 Coeff-Com: -0.500D-04 0.137D-03 0.570D-03 0.939D-03-0.368D-04-0.180D-01
 Coeff-Com: -0.444D-01-0.370D-01 0.342D+00 0.755D+00
 Coeff:     -0.500D-04 0.137D-03 0.570D-03 0.939D-03-0.368D-04-0.180D-01
 Coeff:     -0.444D-01-0.370D-01 0.342D+00 0.755D+00
 Gap=     0.204 Goal=   None    Shift=    0.000
 RMSDP=9.95D-07 MaxDP=7.57D-05 DE=-5.15D-08 OVMax= 7.73D-05

 Cycle  11  Pass 1  IDiag  1:
 RMSU=  2.17D-07    CP:  9.85D-01  6.68D-01  9.17D-01  7.08D-01  9.12D-01
                    CP:  1.11D+00  1.24D+00  8.32D-01  1.22D+00  1.12D+00
 E= -3262.34225873638     Delta-E=       -0.000000013392 Rises=F Damp=F
 DIIS: error= 1.50D-06 at cycle  11 NSaved=  11.
 NSaved=11 IEnMin=11 EnMin= -3262.34225873638     IErMin=11 ErrMin= 1.50D-06
 ErrMax= 1.50D-06  0.00D+00 EMaxC= 1.00D-01 BMatC= 8.64D-10 BMatP= 8.03D-09
 IDIUse=1 WtCom= 1.00D+00 WtEn= 0.00D+00
 Coeff-Com: -0.228D-04 0.475D-04 0.403D-03 0.100D-02 0.155D-02-0.329D-02
 Coeff-Com: -0.232D-01-0.473D-01 0.277D-01 0.283D+00 0.760D+00
 Coeff:     -0.228D-04 0.475D-04 0.403D-03 0.100D-02 0.155D-02-0.329D-02
 Coeff:     -0.232D-01-0.473D-01 0.277D-01 0.283D+00 0.760D+00
 Gap=     0.204 Goal=   None    Shift=    0.000
 RMSDP=3.54D-07 MaxDP=2.43D-05 DE=-1.34D-08 OVMax= 3.49D-05

 Cycle  12  Pass 1  IDiag  1:
 RMSU=  6.32D-08    CP:  9.85D-01  6.68D-01  9.17D-01  7.08D-01  9.13D-01
                    CP:  1.11D+00  1.25D+00  8.39D-01  1.26D+00  1.26D+00
                    CP:  1.11D+00
 E= -3262.34225873797     Delta-E=       -0.000000001593 Rises=F Damp=F
 DIIS: error= 4.28D-07 at cycle  12 NSaved=  12.
 NSaved=12 IEnMin=12 EnMin= -3262.34225873797     IErMin=12 ErrMin= 4.28D-07
 ErrMax= 4.28D-07  0.00D+00 EMaxC= 1.00D-01 BMatC= 8.02D-11 BMatP= 8.64D-10
 IDIUse=1 WtCom= 1.00D+00 WtEn= 0.00D+00
 Coeff-Com:  0.386D-05-0.124D-04 0.450D-05 0.856D-04 0.398D-03 0.205D-02
 Coeff-Com:  0.130D-02-0.889D-02-0.438D-01-0.470D-01 0.160D+00 0.936D+00
 Coeff:      0.386D-05-0.124D-04 0.450D-05 0.856D-04 0.398D-03 0.205D-02
 Coeff:      0.130D-02-0.889D-02-0.438D-01-0.470D-01 0.160D+00 0.936D+00
 Gap=     0.204 Goal=   None    Shift=    0.000
 RMSDP=1.09D-07 MaxDP=8.30D-06 DE=-1.59D-09 OVMax= 1.28D-05

 Cycle  13  Pass 1  IDiag  1:
 RMSU=  2.80D-08    CP:  9.85D-01  6.68D-01  9.17D-01  7.08D-01  9.13D-01
                    CP:  1.11D+00  1.26D+00  8.31D-01  1.28D+00  1.29D+00
                    CP:  1.28D+00  1.22D+00
 E= -3262.34225873822     Delta-E=       -0.000000000246 Rises=F Damp=F
 DIIS: error= 2.23D-07 at cycle  13 NSaved=  13.
 NSaved=13 IEnMin=13 EnMin= -3262.34225873822     IErMin=13 ErrMin= 2.23D-07
 ErrMax= 2.23D-07  0.00D+00 EMaxC= 1.00D-01 BMatC= 1.50D-11 BMatP= 8.02D-11
 IDIUse=1 WtCom= 1.00D+00 WtEn= 0.00D+00
 Coeff-Com:  0.402D-05-0.999D-05-0.406D-04-0.757D-04-0.124D-04 0.108D-02
 Coeff-Com:  0.319D-02 0.143D-02-0.170D-01-0.454D-01-0.153D-01 0.374D+00
 Coeff-Com:  0.699D+00
 Coeff:      0.402D-05-0.999D-05-0.406D-04-0.757D-04-0.124D-04 0.108D-02
 Coeff:      0.319D-02 0.143D-02-0.170D-01-0.454D-01-0.153D-01 0.374D+00
 Coeff:      0.699D+00
 Gap=     0.204 Goal=   None    Shift=    0.000
 RMSDP=1.41D-08 MaxDP=7.27D-07 DE=-2.46D-10 OVMax= 3.74D-06

 Cycle  14  Pass 1  IDiag  1:
 RMSU=  8.76D-09    CP:  9.85D-01  6.68D-01  9.17D-01  7.08D-01  9.13D-01
                    CP:  1.11D+00  1.26D+00  8.30D-01  1.28D+00  1.30D+00
                    CP:  1.30D+00  1.30D+00  1.07D+00
 E= -3262.34225873840     Delta-E=       -0.000000000180 Rises=F Damp=F
 DIIS: error= 9.30D-08 at cycle  14 NSaved=  14.
 NSaved=14 IEnMin=14 EnMin= -3262.34225873840     IErMin=14 ErrMin= 9.30D-08
 ErrMax= 9.30D-08  0.00D+00 EMaxC= 1.00D-01 BMatC= 2.25D-12 BMatP= 1.50D-11
 IDIUse=1 WtCom= 1.00D+00 WtEn= 0.00D+00
 Coeff-Com:  0.427D-06-0.741D-06-0.136D-04-0.368D-04-0.737D-04 0.568D-05
 Coeff-Com:  0.881D-03 0.193D-02 0.115D-02-0.110D-01-0.368D-01-0.400D-01
 Coeff-Com:  0.243D+00 0.841D+00
 Coeff:      0.427D-06-0.741D-06-0.136D-04-0.368D-04-0.737D-04 0.568D-05
 Coeff:      0.881D-03 0.193D-02 0.115D-02-0.110D-01-0.368D-01-0.400D-01
 Coeff:      0.243D+00 0.841D+00
 Gap=     0.204 Goal=   None    Shift=    0.000
 RMSDP=1.18D-08 MaxDP=7.85D-07 DE=-1.80D-10 OVMax= 1.46D-06

 Cycle  15  Pass 1  IDiag  1:
 RMSU=  4.32D-09    CP:  9.85D-01  6.68D-01  9.17D-01  7.08D-01  9.13D-01
                    CP:  1.11D+00  1.26D+00  8.29D-01  1.28D+00  1.30D+00
                    CP:  1.32D+00  1.33D+00  1.16D+00  1.09D+00
 E= -3262.34225873832     Delta-E=        0.000000000082 Rises=F Damp=F
 DIIS: error= 3.55D-08 at cycle  15 NSaved=  15.
 NSaved=15 IEnMin=14 EnMin= -3262.34225873840     IErMin=15 ErrMin= 3.55D-08
 ErrMax= 3.55D-08  0.00D+00 EMaxC= 1.00D-01 BMatC= 3.10D-13 BMatP= 2.25D-12
 IDIUse=1 WtCom= 1.00D+00 WtEn= 0.00D+00
 Coeff-Com: -0.144D-06 0.505D-06-0.226D-05-0.818D-05-0.309D-04-0.969D-04
 Coeff-Com:  0.851D-04 0.678D-03 0.232D-02 0.315D-03-0.946D-02-0.497D-01
 Coeff-Com:  0.268D-01 0.333D+00 0.696D+00
 Coeff:     -0.144D-06 0.505D-06-0.226D-05-0.818D-05-0.309D-04-0.969D-04
 Coeff:      0.851D-04 0.678D-03 0.232D-02 0.315D-03-0.946D-02-0.497D-01
 Coeff:      0.268D-01 0.333D+00 0.696D+00
 Gap=     0.204 Goal=   None    Shift=    0.000
 RMSDP=5.92D-09 MaxDP=3.78D-07 DE= 8.19D-11 OVMax= 2.91D-07

 Error on total polarization charges =  0.01659
 SCF Done:  E(RM062X) =  -3262.34225874     A.U. after   15 cycles
            NFock= 15  Conv=0.59D-08     -V/T= 2.0022
 KE= 3.255255465022D+03 PE=-1.050112968559D+04 EE= 2.609977094448D+03
 Leave Link  502 at Thu Jan 16 01:05:29 2020, MaxMem=   134217728 cpu:      8999.0
 (Enter E:\Gaussian\G09W\l801.exe)
 DoSCS=F DFT=T ScalE2(SS,OS)=  1.000000  1.000000
 ExpMin= 9.52D-02 ExpMax= 5.65D+05 ExpMxC= 5.46D+03 IAcc=3 IRadAn=         5 AccDes= 0.00D+00
 HarFok:  IExCor=  205 AccDes= 0.00D+00 IRadAn=         5 IDoV=-2 UseB2=F ITyADJ=14
 ICtDFT= 12500011 ScaDFX=  1.000000  1.000000  1.000000  1.000000
 Largest valence mixing into a core orbital is  1.12D-04
 Largest core mixing into a valence orbital is  3.38D-05
 Range of M.O.s used for correlation:    26   586
 NBasis=   586 NAE=    71 NBE=    71 NFC=    25 NFV=     0
 NROrb=    561 NOA=    46 NOB=    46 NVA=   515 NVB=   515

 **** Warning!!: The largest alpha MO coefficient is  0.68250530D+02

 Leave Link  801 at Thu Jan 16 01:05:40 2020, MaxMem=   134217728 cpu:         3.0
 (Enter E:\Gaussian\G09W\l914.exe)
 RHF ground state
 MDV=   134217728 DFT=T DoStab=F Mixed=T DoRPA=T DoScal=F NonHer=T
 NEqPCM:  Using non-equilibrium solvation (IEInf=1, Eps=  35.6880, EpsInf=   1.8069)
 Inv3:  Mode=1 IEnd=    14113683.
 Iteration    1 A*A^-1 deviation from unit magnitude is 2.55D-15 for    143.
 Iteration    1 A*A^-1 deviation from orthogonality  is 1.85D-15 for   1528   1224.
 Iteration    1 A^-1*A deviation from unit magnitude is 2.89D-15 for   1234.
 Iteration    1 A^-1*A deviation from orthogonality  is 8.38D-16 for   1028    864.
 Making orbital integer symmetry assigments:
 Orbital symmetries:
       Occupied  (A) (A) (A) (A) (A) (A) (A) (A) (A) (A) (A) (A)
                 (A) (A) (A) (A) (A) (A) (A) (A) (A) (A) (A) (A)
                 (A) (A) (A) (A) (A) (A) (A) (A) (A) (A) (A) (A)
                 (A) (A) (A) (A) (A) (A) (A) (A) (A) (A) (A) (A)
                 (A) (A) (A) (A) (A) (A) (A) (A) (A) (A) (A) (A)
                 (A) (A) (A) (A) (A) (A) (A) (A) (A) (A) (A)
       Virtual   (A) (A) (A) (A) (A) (A) (A) (A) (A) (A) (A) (A)
                 (A) (A) (A) (A) (A) (A) (A) (A) (A) (A) (A) (A)
                 (A) (A) (A) (A) (A) (A) (A) (A) (A) (A) (A) (A)
                 (A) (A) (A) (A) (A) (A) (A) (A) (A) (A) (A) (A)
                 (A) (A) (A) (A) (A) (A) (A) (A) (A) (A) (A) (A)
                 (A) (A) (A) (A) (A) (A) (A) (A) (A) (A) (A) (A)
                 (A) (A) (A) (A) (A) (A) (A) (A) (A) (A) (A) (A)
                 (A) (A) (A) (A) (A) (A) (A) (A) (A) (A) (A) (A)
                 (A) (A) (A) (A) (A) (A) (A) (A) (A) (A) (A) (A)
                 (A) (A) (A) (A) (A) (A) (A) (A) (A) (A) (A) (A)
                 (A) (A) (A) (A) (A) (A) (A) (A) (A) (A) (A) (A)
                 (A) (A) (A) (A) (A) (A) (A) (A) (A) (A) (A) (A)
                 (A) (A) (A) (A) (A) (A) (A) (A) (A) (A) (A) (A)
                 (A) (A) (A) (A) (A) (A) (A) (A) (A) (A) (A) (A)
                 (A) (A) (A) (A) (A) (A) (A) (A) (A) (A) (A) (A)
                 (A) (A) (A) (A) (A) (A) (A) (A) (A) (A) (A) (A)
                 (A) (A) (A) (A) (A) (A) (A) (A) (A) (A) (A) (A)
                 (A) (A) (A) (A) (A) (A) (A) (A) (A) (A) (A) (A)
                 (A) (A) (A) (A) (A) (A) (A) (A) (A) (A) (A) (A)
                 (A) (A) (A) (A) (A) (A) (A) (A) (A) (A) (A) (A)
                 (A) (A) (A) (A) (A) (A) (A) (A) (A) (A) (A) (A)
                 (A) (A) (A) (A) (A) (A) (A) (A) (A) (A) (A) (A)
                 (A) (A) (A) (A) (A) (A) (A) (A) (A) (A) (A) (A)
                 (A) (A) (A) (A) (A) (A) (A) (A) (A) (A) (A) (A)
                 (A) (A) (A) (A) (A) (A) (A) (A) (A) (A) (A) (A)
                 (A) (A) (A) (A) (A) (A) (A) (A) (A) (A) (A) (A)
                 (A) (A) (A) (A) (A) (A) (A) (A) (A) (A) (A) (A)
                 (A) (A) (A) (A) (A) (A) (A) (A) (A) (A) (A) (A)
                 (A) (A) (A) (A) (A) (A) (A) (A) (A) (A) (A) (A)
                 (A) (A) (A) (A) (A) (A) (A) (A) (A) (A) (A) (A)
                 (A) (A) (A) (A) (A) (A) (A) (A) (A) (A) (A) (A)
                 (A) (A) (A) (A) (A) (A) (A) (A) (A) (A) (A) (A)
                 (A) (A) (A) (A) (A) (A) (A) (A) (A) (A) (A) (A)
                 (A) (A) (A) (A) (A) (A) (A) (A) (A) (A) (A) (A)
                 (A) (A) (A) (A) (A) (A) (A) (A) (A) (A) (A) (A)
                 (A) (A) (A) (A) (A) (A) (A) (A) (A) (A) (A) (A)
                 (A) (A) (A) (A) (A) (A) (A) (A) (A) (A) (A) (A)
                 (A) (A) (A) (A) (A) (A) (A) (A) (A) (A) (A) (A)
                 (A) (A) (A) (A) (A) (A) (A) (A) (A) (A) (A) (A)
                 (A) (A) (A) (A) (A) (A) (A) (A) (A) (A) (A) (A)
                 (A) (A) (A) (A) (A) (A) (A) (A) (A) (A) (A) (A)
                 (A) (A) (A) (A) (A) (A) (A) (A) (A) (A) (A) (A)
                 (A) (A) (A) (A) (A) (A) (A) (A) (A) (A) (A)
    16 initial guesses have been made.
 Convergence on wavefunction:    0.001000000000000
 Davidson Disk Diagonalization:  ConvIn= 1.00D-03 SkipCon=T Conv= 1.00D-03.
 Max sub-space:   200 roots to seek:    16 dimension of matrix:        47380
 Iteration     1 Dimension    16 NMult     0 NNew     16
 CISAX will form    16 AO SS matrices at one time.
 NMat=    16 NSing=     0 JSym2X= 0.
 FoFJK:  IHMeth= 1 ICntrl=       0 DoSepK=F KAlg= 0 I1Cent=   0 FoldK=F
 IRaf=         0 NMat=  32 IRICut=       1 DoRegI=T DoRafI=F ISym2E= 0.
 New state      2 was old state      5
 New state      3 was old state      2
 New state      4 was old state      3
 Excitation Energies [eV] at current iteration:
 Root      1 :     2.699574520340149
 Root      2 :     3.401070780267953
 Root      3 :     3.421298905912936
 Root      4 :     3.536130255792613
 Root      5 :     3.611572953291663
 Root      6 :     3.854016533185703
 Root      7 :     4.443060400320958
 Root      8 :     5.160006106336662
 Root      9 :     5.233160656585390
 Root     10 :     5.379178260805702
 Root     11 :     5.479694553919428
 Root     12 :     5.484703861876448
 Root     13 :     5.811105465928154
 Root     14 :     5.976939392641321
 Root     15 :     6.092447557378309
 Root     16 :     6.565381123538408
 Iteration     2 Dimension    24 NMult    16 NNew      8
 CISAX will form     8 AO SS matrices at one time.
 NMat=     8 NSing=     0 JSym2X= 0.
 Root      1 not converged, maximum delta is    0.062531626670107
 Root      2 not converged, maximum delta is    0.121894407501316
 New state      3 was old state      4
 Root      3 not converged, maximum delta is    0.496562363325288
 New state      4 was old state      3
 Root      4 not converged, maximum delta is    0.440315332133757
 Excitation Energies [eV] at current iteration:
 Root      1 :     2.410831313700529   Change is   -0.288743206639620
 Root      2 :     2.716421856650589   Change is   -0.684648923617365
 Root      3 :     2.992104173458080   Change is   -0.544026082334533
 Root      4 :     3.262395883295184   Change is   -0.158903022617752
 Iteration     3 Dimension    32 NMult    24 NNew      8
 CISAX will form     8 AO SS matrices at one time.
 NMat=     8 NSing=     0 JSym2X= 0.
 Root      1 not converged, maximum delta is    0.023240669056476
 Root      2 not converged, maximum delta is    0.020625396931072
 Root      3 not converged, maximum delta is    0.027640220519740
 Root      4 not converged, maximum delta is    0.104378805444601
 Excitation Energies [eV] at current iteration:
 Root      1 :     2.379693813030062   Change is   -0.031137500670467
 Root      2 :     2.677253786932948   Change is   -0.039168069717641
 Root      3 :     2.944434855092342   Change is   -0.047669318365738
 Root      4 :     3.196677114999392   Change is   -0.065718768295792
 Iteration     4 Dimension    40 NMult    32 NNew      8
 CISAX will form     8 AO SS matrices at one time.
 NMat=     8 NSing=     0 JSym2X= 0.
 Root      1 not converged, maximum delta is    0.006808266371651
 Root      2 not converged, maximum delta is    0.038927901255789
 Root      3 not converged, maximum delta is    0.007525472265820
 No map to state      4
 Excitation Energies [eV] at current iteration:
 Root      1 :     2.377194283914695   Change is   -0.002499529115367
 Root      2 :     2.667588816913656   Change is   -0.009664970019291
 Root      3 :     2.941202981272559   Change is   -0.003231873819782
 Root      4 :     3.173286014350976
 Iteration     5 Dimension    48 NMult    40 NNew      8
 CISAX will form     8 AO SS matrices at one time.
 NMat=     8 NSing=     0 JSym2X= 0.
 Root      1 not converged, maximum delta is    0.001614119022923
 Root      2 not converged, maximum delta is    0.065511999917591
 New state      3 was old state      4
 Root      3 not converged, maximum delta is    0.092212355783983
 New state      4 was old state      3
 Root      4 not converged, maximum delta is    0.002859612218387
 Excitation Energies [eV] at current iteration:
 Root      1 :     2.376945443335800   Change is   -0.000248840578895
 Root      2 :     2.659438627201985   Change is   -0.008150189711671
 Root      3 :     2.881073668545024   Change is   -0.292212345805952
 Root      4 :     2.940854346181082   Change is   -0.000348635091477
 Iteration     6 Dimension    56 NMult    48 NNew      8
 CISAX will form     8 AO SS matrices at one time.
 NMat=     8 NSing=     0 JSym2X= 0.
 Root      1 has converged.
 Root      2 not converged, maximum delta is    0.005588181125765
 Root      3 not converged, maximum delta is    0.011895647834113
 Root      4 has converged.
 Excitation Energies [eV] at current iteration:
 Root      1 :     2.376925993783682   Change is   -0.000019449552118
 Root      2 :     2.658756533746938   Change is   -0.000682093455047
 Root      3 :     2.870797479125127   Change is   -0.010276189419897
 Root      4 :     2.940826115910081   Change is   -0.000028230271002
 Iteration     7 Dimension    60 NMult    56 NNew      4
 CISAX will form     4 AO SS matrices at one time.
 NMat=     4 NSing=     0 JSym2X= 0.
 Root      1 has converged.
 Root      2 has converged.
 Root      3 not converged, maximum delta is    0.001133721528597
 Root      4 has converged.
 Excitation Energies [eV] at current iteration:
 Root      1 :     2.376925993768534   Change is   -0.000000000015148
 Root      2 :     2.658735872702963   Change is   -0.000020661043975
 Root      3 :     2.870496996571965   Change is   -0.000300482553162
 Root      4 :     2.940826115884391   Change is   -0.000000000025690
 Iteration     8 Dimension    62 NMult    60 NNew      2
 CISAX will form     2 AO SS matrices at one time.
 NMat=     2 NSing=     0 JSym2X= 0.
 Root      1 has converged.
 Root      2 has converged.
 Root      3 has converged.
 Root      4 has converged.
 Excitation Energies [eV] at current iteration:
 Root      1 :     2.376925993764038   Change is   -0.000000000004496
 Root      2 :     2.658735326149514   Change is   -0.000000546553449
 Root      3 :     2.870488470372306   Change is   -0.000008526199659
 Root      4 :     2.940826115881931   Change is   -0.000000000002460
 Convergence achieved on expansion vectors.
 ***********************************************************************
 Excited states from <AA,BB:AA,BB> singles matrix:
 ***********************************************************************
 
 1PDM for each excited state written to RWF  633
 Ground to excited state transition densities written to RWF  633
 Ground to excited state transition electric dipole moments (Au):
       state          X           Y           Z        Dip. S.      Osc.
         1         0.0000      0.0000      0.0000      0.0000      0.0000
         2         0.0000      0.0000      0.0000      0.0000      0.0000
         3         0.0000      0.0000      0.0000      0.0000      0.0000
         4         0.0000      0.0000      0.0000      0.0000      0.0000
 Ground to excited state transition velocity dipole moments (Au):
       state          X           Y           Z        Dip. S.      Osc.
         1         0.0000      0.0000      0.0000      0.0000      0.0000
         2         0.0000      0.0000      0.0000      0.0000      0.0000
         3         0.0000      0.0000      0.0000      0.0000      0.0000
         4         0.0000      0.0000      0.0000      0.0000      0.0000
 Ground to excited state transition magnetic dipole moments (Au):
       state          X           Y           Z
         1         0.0000      0.0000      0.0000
         2         0.0000      0.0000      0.0000
         3         0.0000      0.0000      0.0000
         4         0.0000      0.0000      0.0000
 Ground to excited state transition velocity quadrupole moments (Au):
       state          XX          YY          ZZ          XY          XZ          YZ
         1         0.0000      0.0000      0.0000      0.0000      0.0000      0.0000
         2         0.0000      0.0000      0.0000      0.0000      0.0000      0.0000
         3         0.0000      0.0000      0.0000      0.0000      0.0000      0.0000
         4         0.0000      0.0000      0.0000      0.0000      0.0000      0.0000
 <0|del|b> * <b|rxdel|0> + <0|del|b> * <b|delr+rdel|0>
 Rotatory Strengths (R) in cgs (10**-40 erg-esu-cm/Gauss)
       state          XX          YY          ZZ    R(velocity)    E-M Angle
         1         0.0000      0.0000      0.0000      0.0000       90.00
         2         0.0000      0.0000      0.0000      0.0000       90.00
         3         0.0000      0.0000      0.0000      0.0000       90.00
         4         0.0000      0.0000      0.0000      0.0000       90.00
 1/2[<0|r|b>*<b|rxdel|0> + (<0|rxdel|b>*<b|r|0>)*]
 Rotatory Strengths (R) in cgs (10**-40 erg-esu-cm/Gauss)
       state          XX          YY          ZZ     R(length)
         1         0.0000      0.0000      0.0000      0.0000
         2         0.0000      0.0000      0.0000      0.0000
         3         0.0000      0.0000      0.0000      0.0000
         4         0.0000      0.0000      0.0000      0.0000
  1/2[<0|del|b>*<b|r|0> + (<0|r|b>*<b|del|0>)*] (Au)
       state          X           Y           Z        Dip. S.   Osc.(frdel)
         1         0.0000      0.0000      0.0000      0.0000      0.0000
         2         0.0000      0.0000      0.0000      0.0000      0.0000
         3         0.0000      0.0000      0.0000      0.0000      0.0000
         4         0.0000      0.0000      0.0000      0.0000      0.0000

 Excitation energies and oscillator strengths:
 
 Excited State   1:      Triplet-A      2.3769 eV  521.62 nm  f=0.0000  <S**2>=2.000
      64 -> 72        -0.20136
      68 -> 72        -0.13647
      69 -> 72         0.18695
      71 -> 72         0.59083
      71 -> 73         0.10781
      71 -> 74         0.15376
 This state for optimization and/or second-order correction.
 Total Energy, E(TD-HF/TD-KS) =  -3262.25490831    
 Copying the excited state density for this state as the 1-particle RhoCI density.
 
 Excited State   2:      Triplet-A      2.6587 eV  466.33 nm  f=0.0000  <S**2>=2.000
      66 -> 72         0.22305
      66 -> 73         0.16303
      66 -> 78        -0.12363
      67 -> 72         0.60004
 
 Excited State   3:      Triplet-A      2.8705 eV  431.93 nm  f=0.0000  <S**2>=2.000
      65 -> 72        -0.35922
      65 -> 73         0.11118
      66 -> 72         0.48033
      67 -> 72        -0.15258
      67 -> 73         0.21938
      67 -> 78        -0.14329
 
 Excited State   4:      Triplet-A      2.9408 eV  421.60 nm  f=0.0000  <S**2>=2.000
      60 -> 72        -0.12442
      68 -> 72        -0.17722
      69 -> 72         0.52887
      69 -> 74        -0.17092
      70 -> 72        -0.15033
      70 -> 73        -0.13319
      71 -> 72        -0.27792
 SavETr:  write IOETrn=   770 NScale= 10 NData=  16 NLR=1 NState=    4 LETran=      78.
 Leave Link  914 at Thu Jan 16 07:05:14 2020, MaxMem=   134217728 cpu:     21573.0
 (Enter E:\Gaussian\G09W\l601.exe)
 Copying SCF densities to generalized density rwf, IOpCl= 0 IROHF=0.

 **********************************************************************

            Population analysis using the SCF density.

 **********************************************************************

 Orbital symmetries:
       Occupied  (A) (A) (A) (A) (A) (A) (A) (A) (A) (A) (A) (A)
                 (A) (A) (A) (A) (A) (A) (A) (A) (A) (A) (A) (A)
                 (A) (A) (A) (A) (A) (A) (A) (A) (A) (A) (A) (A)
                 (A) (A) (A) (A) (A) (A) (A) (A) (A) (A) (A) (A)
                 (A) (A) (A) (A) (A) (A) (A) (A) (A) (A) (A) (A)
                 (A) (A) (A) (A) (A) (A) (A) (A) (A) (A) (A)
       Virtual   (A) (A) (A) (A) (A) (A) (A) (A) (A) (A) (A) (A)
                 (A) (A) (A) (A) (A) (A) (A) (A) (A) (A) (A) (A)
                 (A) (A) (A) (A) (A) (A) (A) (A) (A) (A) (A) (A)
                 (A) (A) (A) (A) (A) (A) (A) (A) (A) (A) (A) (A)
                 (A) (A) (A) (A) (A) (A) (A) (A) (A) (A) (A) (A)
                 (A) (A) (A) (A) (A) (A) (A) (A) (A) (A) (A) (A)
                 (A) (A) (A) (A) (A) (A) (A) (A) (A) (A) (A) (A)
                 (A) (A) (A) (A) (A) (A) (A) (A) (A) (A) (A) (A)
                 (A) (A) (A) (A) (A) (A) (A) (A) (A) (A) (A) (A)
                 (A) (A) (A) (A) (A) (A) (A) (A) (A) (A) (A) (A)
                 (A) (A) (A) (A) (A) (A) (A) (A) (A) (A) (A) (A)
                 (A) (A) (A) (A) (A) (A) (A) (A) (A) (A) (A) (A)
                 (A) (A) (A) (A) (A) (A) (A) (A) (A) (A) (A) (A)
                 (A) (A) (A) (A) (A) (A) (A) (A) (A) (A) (A) (A)
                 (A) (A) (A) (A) (A) (A) (A) (A) (A) (A) (A) (A)
                 (A) (A) (A) (A) (A) (A) (A) (A) (A) (A) (A) (A)
                 (A) (A) (A) (A) (A) (A) (A) (A) (A) (A) (A) (A)
                 (A) (A) (A) (A) (A) (A) (A) (A) (A) (A) (A) (A)
                 (A) (A) (A) (A) (A) (A) (A) (A) (A) (A) (A) (A)
                 (A) (A) (A) (A) (A) (A) (A) (A) (A) (A) (A) (A)
                 (A) (A) (A) (A) (A) (A) (A) (A) (A) (A) (A) (A)
                 (A) (A) (A) (A) (A) (A) (A) (A) (A) (A) (A) (A)
                 (A) (A) (A) (A) (A) (A) (A) (A) (A) (A) (A) (A)
                 (A) (A) (A) (A) (A) (A) (A) (A) (A) (A) (A) (A)
                 (A) (A) (A) (A) (A) (A) (A) (A) (A) (A) (A) (A)
                 (A) (A) (A) (A) (A) (A) (A) (A) (A) (A) (A) (A)
                 (A) (A) (A) (A) (A) (A) (A) (A) (A) (A) (A) (A)
                 (A) (A) (A) (A) (A) (A) (A) (A) (A) (A) (A) (A)
                 (A) (A) (A) (A) (A) (A) (A) (A) (A) (A) (A) (A)
                 (A) (A) (A) (A) (A) (A) (A) (A) (A) (A) (A) (A)
                 (A) (A) (A) (A) (A) (A) (A) (A) (A) (A) (A) (A)
                 (A) (A) (A) (A) (A) (A) (A) (A) (A) (A) (A) (A)
                 (A) (A) (A) (A) (A) (A) (A) (A) (A) (A) (A) (A)
                 (A) (A) (A) (A) (A) (A) (A) (A) (A) (A) (A) (A)
                 (A) (A) (A) (A) (A) (A) (A) (A) (A) (A) (A) (A)
                 (A) (A) (A) (A) (A) (A) (A) (A) (A) (A) (A) (A)
                 (A) (A) (A) (A) (A) (A) (A) (A) (A) (A) (A) (A)
                 (A) (A) (A) (A) (A) (A) (A) (A) (A) (A) (A) (A)
                 (A) (A) (A) (A) (A) (A) (A) (A) (A) (A) (A) (A)
                 (A) (A) (A) (A) (A) (A) (A) (A) (A) (A) (A) (A)
                 (A) (A) (A) (A) (A) (A) (A) (A) (A) (A) (A) (A)
                 (A) (A) (A) (A) (A) (A) (A) (A) (A) (A) (A) (A)
                 (A) (A) (A) (A) (A) (A) (A) (A) (A) (A) (A)
 The electronic state is 1-A.
 Alpha  occ. eigenvalues -- -485.39243 -63.37723 -57.19657 -57.19427 -57.19410
 Alpha  occ. eigenvalues --  -19.64373 -19.63527 -10.65871 -10.65321 -10.63411
 Alpha  occ. eigenvalues --  -10.59239 -10.58970 -10.58130 -10.58113 -10.58041
 Alpha  occ. eigenvalues --  -10.57939 -10.57772 -10.56766 -10.56734 -10.56677
 Alpha  occ. eigenvalues --  -10.56637  -9.04390  -6.86801  -6.85934  -6.85876
 Alpha  occ. eigenvalues --   -2.90181  -2.89869  -2.89810  -2.89004  -2.89003
 Alpha  occ. eigenvalues --   -1.18084  -1.15952  -1.00431  -0.98994  -0.93536
 Alpha  occ. eigenvalues --   -0.90173  -0.88492  -0.87654  -0.84322  -0.79294
 Alpha  occ. eigenvalues --   -0.75045  -0.72956  -0.69872  -0.66925  -0.64411
 Alpha  occ. eigenvalues --   -0.63023  -0.58601  -0.56715  -0.56000  -0.54398
 Alpha  occ. eigenvalues --   -0.53713  -0.53231  -0.53123  -0.51701  -0.51117
 Alpha  occ. eigenvalues --   -0.50098  -0.48652  -0.47318  -0.46318  -0.44202
 Alpha  occ. eigenvalues --   -0.44160  -0.43456  -0.42238  -0.38972  -0.36858
 Alpha  occ. eigenvalues --   -0.36493  -0.35237  -0.34828  -0.33545  -0.33123
 Alpha  occ. eigenvalues --   -0.30819
 Alpha virt. eigenvalues --   -0.10419  -0.04671  -0.01592   0.00686   0.03345
 Alpha virt. eigenvalues --    0.07204   0.08096   0.08883   0.10029   0.10848
 Alpha virt. eigenvalues --    0.11123   0.11689   0.13241   0.13689   0.14487
 Alpha virt. eigenvalues --    0.14662   0.16163   0.16395   0.17812   0.19509
 Alpha virt. eigenvalues --    0.20236   0.21138   0.21743   0.21988   0.22368
 Alpha virt. eigenvalues --    0.22921   0.23822   0.24104   0.24470   0.25110
 Alpha virt. eigenvalues --    0.25303   0.25531   0.26560   0.26735   0.26909
 Alpha virt. eigenvalues --    0.27387   0.28238   0.29425   0.29455   0.30024
 Alpha virt. eigenvalues --    0.30277   0.31730   0.31982   0.32411   0.32988
 Alpha virt. eigenvalues --    0.33077   0.33813   0.34012   0.34643   0.35802
 Alpha virt. eigenvalues --    0.35949   0.37551   0.37979   0.38223   0.38383
 Alpha virt. eigenvalues --    0.38813   0.39755   0.40143   0.41024   0.41349
 Alpha virt. eigenvalues --    0.41813   0.43421   0.43634   0.44044   0.45287
 Alpha virt. eigenvalues --    0.46246   0.46442   0.47415   0.49060   0.49425
 Alpha virt. eigenvalues --    0.50248   0.50331   0.50721   0.51437   0.51843
 Alpha virt. eigenvalues --    0.52592   0.52656   0.53851   0.54291   0.55866
 Alpha virt. eigenvalues --    0.56526   0.57377   0.57614   0.59025   0.59766
 Alpha virt. eigenvalues --    0.61396   0.61763   0.62990   0.64248   0.65395
 Alpha virt. eigenvalues --    0.66118   0.67263   0.67343   0.67889   0.68456
 Alpha virt. eigenvalues --    0.68724   0.69056   0.70583   0.71655   0.72173
 Alpha virt. eigenvalues --    0.72586   0.73430   0.73855   0.75605   0.75890
 Alpha virt. eigenvalues --    0.76134   0.76805   0.77658   0.77667   0.78327
 Alpha virt. eigenvalues --    0.79066   0.80680   0.80708   0.81689   0.81730
 Alpha virt. eigenvalues --    0.83333   0.85230   0.86041   0.87013   0.87711
 Alpha virt. eigenvalues --    0.88531   0.89410   0.90483   0.90500   0.91100
 Alpha virt. eigenvalues --    0.92276   0.92558   0.92773   0.96024   0.97108
 Alpha virt. eigenvalues --    0.97522   0.97911   0.99388   0.99820   1.00786
 Alpha virt. eigenvalues --    1.02337   1.04230   1.04244   1.05686   1.06717
 Alpha virt. eigenvalues --    1.09943   1.09980   1.10556   1.12357   1.14280
 Alpha virt. eigenvalues --    1.14299   1.14958   1.15468   1.18366   1.20191
 Alpha virt. eigenvalues --    1.21194   1.21455   1.22724   1.23197   1.24064
 Alpha virt. eigenvalues --    1.25502   1.25617   1.26807   1.27397   1.27880
 Alpha virt. eigenvalues --    1.28541   1.29580   1.31090   1.34161   1.34319
 Alpha virt. eigenvalues --    1.36235   1.36983   1.38733   1.39146   1.41139
 Alpha virt. eigenvalues --    1.41352   1.41581   1.41700   1.42636   1.44983
 Alpha virt. eigenvalues --    1.46059   1.46501   1.46651   1.47322   1.49429
 Alpha virt. eigenvalues --    1.49845   1.50912   1.52440   1.52466   1.53167
 Alpha virt. eigenvalues --    1.53360   1.54198   1.56250   1.56642   1.56820
 Alpha virt. eigenvalues --    1.58189   1.58948   1.60711   1.60857   1.62658
 Alpha virt. eigenvalues --    1.63389   1.63588   1.64350   1.64650   1.65221
 Alpha virt. eigenvalues --    1.66797   1.67397   1.68930   1.69506   1.70599
 Alpha virt. eigenvalues --    1.70902   1.71939   1.72601   1.73416   1.74614
 Alpha virt. eigenvalues --    1.75056   1.75458   1.78571   1.79204   1.80269
 Alpha virt. eigenvalues --    1.80599   1.82984   1.84408   1.85463   1.86762
 Alpha virt. eigenvalues --    1.86903   1.88435   1.89928   1.90064   1.90644
 Alpha virt. eigenvalues --    1.91917   1.93663   1.94162   1.94337   1.97544
 Alpha virt. eigenvalues --    2.00943   2.01031   2.02181   2.04253   2.05397
 Alpha virt. eigenvalues --    2.06542   2.08099   2.08811   2.11437   2.13245
 Alpha virt. eigenvalues --    2.14770   2.15846   2.16773   2.18882   2.19464
 Alpha virt. eigenvalues --    2.20567   2.20790   2.21227   2.22927   2.23693
 Alpha virt. eigenvalues --    2.26111   2.28877   2.29904   2.30567   2.34231
 Alpha virt. eigenvalues --    2.35131   2.35917   2.36301   2.36864   2.38756
 Alpha virt. eigenvalues --    2.40020   2.44316   2.44857   2.45827   2.48905
 Alpha virt. eigenvalues --    2.51110   2.52500   2.52645   2.54772   2.54813
 Alpha virt. eigenvalues --    2.57630   2.58611   2.59215   2.60493   2.60885
 Alpha virt. eigenvalues --    2.61560   2.63117   2.63754   2.65367   2.65742
 Alpha virt. eigenvalues --    2.67059   2.67925   2.68919   2.70392   2.70450
 Alpha virt. eigenvalues --    2.71157   2.72294   2.74012   2.74445   2.75004
 Alpha virt. eigenvalues --    2.75918   2.76904   2.77045   2.79464   2.80407
 Alpha virt. eigenvalues --    2.81038   2.82198   2.83303   2.83555   2.83654
 Alpha virt. eigenvalues --    2.84382   2.87067   2.87113   2.88267   2.88464
 Alpha virt. eigenvalues --    2.88832   2.89583   2.89667   2.89797   2.92640
 Alpha virt. eigenvalues --    2.93340   2.94637   2.94751   2.96558   2.96704
 Alpha virt. eigenvalues --    2.98320   2.98323   2.98864   2.99791   3.02022
 Alpha virt. eigenvalues --    3.02461   3.02989   3.03141   3.04857   3.06121
 Alpha virt. eigenvalues --    3.06742   3.09169   3.09809   3.10103   3.12138
 Alpha virt. eigenvalues --    3.12250   3.12279   3.13578   3.14741   3.15361
 Alpha virt. eigenvalues --    3.16455   3.17628   3.18367   3.19148   3.20178
 Alpha virt. eigenvalues --    3.20727   3.21654   3.22854   3.24862   3.26210
 Alpha virt. eigenvalues --    3.26861   3.27610   3.28906   3.30191   3.30586
 Alpha virt. eigenvalues --    3.31137   3.31390   3.31875   3.32722   3.33943
 Alpha virt. eigenvalues --    3.35228   3.37115   3.38075   3.38951   3.39278
 Alpha virt. eigenvalues --    3.40732   3.40800   3.41959   3.42658   3.43612
 Alpha virt. eigenvalues --    3.45027   3.45593   3.46336   3.46478   3.47927
 Alpha virt. eigenvalues --    3.48315   3.49102   3.50223   3.51373   3.51551
 Alpha virt. eigenvalues --    3.52111   3.53555   3.54080   3.55458   3.55702
 Alpha virt. eigenvalues --    3.58442   3.59433   3.60537   3.62619   3.64264
 Alpha virt. eigenvalues --    3.65904   3.66357   3.68341   3.72086   3.75707
 Alpha virt. eigenvalues --    3.76547   3.76763   3.78899   3.80530   3.83450
 Alpha virt. eigenvalues --    3.84717   3.85233   3.85506   3.86385   3.88693
 Alpha virt. eigenvalues --    3.92344   3.94571   3.97615   3.98809   3.98937
 Alpha virt. eigenvalues --    4.00620   4.01967   4.03091   4.04231   4.04521
 Alpha virt. eigenvalues --    4.05595   4.07433   4.09151   4.10344   4.10877
 Alpha virt. eigenvalues --    4.12861   4.14446   4.14585   4.15996   4.16732
 Alpha virt. eigenvalues --    4.17919   4.18883   4.19071   4.19832   4.22119
 Alpha virt. eigenvalues --    4.23918   4.24332   4.25189   4.26443   4.29978
 Alpha virt. eigenvalues --    4.31027   4.33970   4.34194   4.37138   4.39578
 Alpha virt. eigenvalues --    4.41704   4.47885   4.49229   4.49839   4.52070
 Alpha virt. eigenvalues --    4.53326   4.54332   4.56129   4.57373   4.61847
 Alpha virt. eigenvalues --    4.64844   4.67101   4.67725   4.68734   4.71750
 Alpha virt. eigenvalues --    4.72983   4.75905   4.78800   4.81925   4.84245
 Alpha virt. eigenvalues --    4.91032   4.95936   4.98215   4.99969   5.03076
 Alpha virt. eigenvalues --    5.05246   5.07311   5.14833   5.17088   5.17434
 Alpha virt. eigenvalues --    5.19691   5.21990   5.24855   5.27046   5.27902
 Alpha virt. eigenvalues --    5.29470   5.35239   5.38609   5.40485   5.49472
 Alpha virt. eigenvalues --    5.51281   5.57577   5.58577   5.65179   5.68749
 Alpha virt. eigenvalues --    5.73586   5.88195   5.96578   6.04529   6.25509
 Alpha virt. eigenvalues --    6.36259   6.38475   6.40537   6.46375   6.58811
 Alpha virt. eigenvalues --    6.68838   6.77687   6.78814   6.80292   7.02660
 Alpha virt. eigenvalues --    7.06673   7.08155   7.23451   7.89170  22.03046
 Alpha virt. eigenvalues --   22.56231  22.69980  22.72900  22.76492  22.80218
 Alpha virt. eigenvalues --   22.90447  22.93839  22.94972  23.06941  23.23147
 Alpha virt. eigenvalues --   23.34870  23.42578  23.93858  44.08341  44.20359
          Condensed to atoms (all electrons):
               1          2          3          4          5          6
     1  C    4.974240   0.395088  -0.006021  -0.062742   0.039730   0.422911
     2  C    0.395088   5.378774   0.250783  -0.091072  -0.178313   0.043861
     3  C   -0.006021   0.250783   5.479937   0.488017  -0.081334  -0.066901
     4  C   -0.062742  -0.091072   0.488017   5.435728   0.274686  -0.010137
     5  C    0.039730  -0.178313  -0.081334   0.274686   5.351030   0.399212
     6  C    0.422911   0.043861  -0.066901  -0.010137   0.399212   4.974873
     7  H    0.420059  -0.035987   0.006274   0.000292   0.005470  -0.034993
     8  H   -0.029770   0.426064  -0.049003   0.008670  -0.002426   0.005951
     9  H    0.005589  -0.002263   0.009127  -0.046656   0.424302  -0.029197
    10  H   -0.034624   0.005384   0.000187   0.005752  -0.035463   0.420145
    11  C   -0.009418   0.027285   0.063274   0.180519  -0.146821   0.019194
    12  O    0.000683  -0.000402   0.000018  -0.198905   0.047685   0.000116
    13  C    0.019613  -0.150469   0.133449   0.068287   0.023596  -0.009117
    14  C    0.003966  -0.011060  -0.151333   0.003955   0.074297  -0.006576
    15  C   -0.007087   0.081652   0.015185  -0.151181  -0.009566   0.004147
    16  C   -0.000175   0.002205  -0.002704   0.064123  -0.012520   0.000244
    17  C    0.000186  -0.010624   0.070070  -0.003955   0.001861  -0.000136
    18  C   -0.000002  -0.000106   0.002809  -0.003404   0.000077   0.000000
    19  H    0.000000  -0.000003  -0.000363   0.004726  -0.000354  -0.000001
    20  C    0.000001   0.000200  -0.006584   0.002730  -0.000106  -0.000001
    21  H   -0.000003  -0.000358   0.004439  -0.000386  -0.000006   0.000001
    22  H    0.000000   0.000003  -0.000017   0.000001   0.000000   0.000000
    23  Br   0.000000   0.000000  -0.000011   0.000078  -0.000003   0.000000
    24  O    0.000215   0.048825  -0.209394   0.000641  -0.000370   0.000686
               7          8          9         10         11         12
     1  C    0.420059  -0.029770   0.005589  -0.034624  -0.009418   0.000683
     2  C   -0.035987   0.426064  -0.002263   0.005384   0.027285  -0.000402
     3  C    0.006274  -0.049003   0.009127   0.000187   0.063274   0.000018
     4  C    0.000292   0.008670  -0.046656   0.005752   0.180519  -0.198905
     5  C    0.005470  -0.002426   0.424302  -0.035463  -0.146821   0.047685
     6  C   -0.034993   0.005951  -0.029197   0.420145   0.019194   0.000116
     7  H    0.467914  -0.003299  -0.000153  -0.003333   0.000093   0.000001
     8  H   -0.003299   0.462724   0.000044  -0.000146   0.000995   0.000008
     9  H   -0.000153   0.000044   0.463584  -0.003131  -0.022209   0.019449
    10  H   -0.003333  -0.000146  -0.003131   0.467276  -0.000266  -0.000112
    11  C    0.000093   0.000995  -0.022209  -0.000266   5.006075   0.719807
    12  O    0.000001   0.000008   0.019449  -0.000112   0.719807   7.930712
    13  C   -0.000330  -0.021766   0.000974   0.000097  -0.151823  -0.005333
    14  C    0.000008  -0.000464   0.004803  -0.000032   0.103572  -0.213126
    15  C   -0.000039   0.005440  -0.000434   0.000010   0.071772   0.001567
    16  C   -0.000001  -0.000008  -0.000460   0.000002  -0.098992   0.058846
    17  C    0.000002  -0.000421  -0.000008   0.000000   0.015152  -0.000511
    18  C    0.000000   0.000001  -0.000004   0.000000   0.005782   0.001323
    19  H    0.000000   0.000000  -0.000043   0.000000  -0.015122   0.020222
    20  C    0.000000  -0.000003   0.000001   0.000000  -0.002662   0.000655
    21  H    0.000000  -0.000047   0.000000   0.000000   0.000804   0.000007
    22  H    0.000000   0.000000   0.000000   0.000000   0.000176   0.000001
    23  Br   0.000000   0.000000   0.000000   0.000000  -0.001936   0.000056
    24  O   -0.000129   0.020520   0.000007   0.000001  -0.005409   0.000005
              13         14         15         16         17         18
     1  C    0.019613   0.003966  -0.007087  -0.000175   0.000186  -0.000002
     2  C   -0.150469  -0.011060   0.081652   0.002205  -0.010624  -0.000106
     3  C    0.133449  -0.151333   0.015185  -0.002704   0.070070   0.002809
     4  C    0.068287   0.003955  -0.151181   0.064123  -0.003955  -0.003404
     5  C    0.023596   0.074297  -0.009566  -0.012520   0.001861   0.000077
     6  C   -0.009117  -0.006576   0.004147   0.000244  -0.000136   0.000000
     7  H   -0.000330   0.000008  -0.000039  -0.000001   0.000002   0.000000
     8  H   -0.021766  -0.000464   0.005440  -0.000008  -0.000421   0.000001
     9  H    0.000974   0.004803  -0.000434  -0.000460  -0.000008  -0.000004
    10  H    0.000097  -0.000032   0.000010   0.000002   0.000000   0.000000
    11  C   -0.151823   0.103572   0.071772  -0.098992   0.015152   0.005782
    12  O   -0.005333  -0.213126   0.001567   0.058846  -0.000511   0.001323
    13  C    5.070152   0.073437   0.101369   0.018841  -0.125483  -0.007397
    14  C    0.073437   5.597452   0.472226   0.107802  -0.038865   0.029336
    15  C    0.101369   0.472226   5.533311  -0.076787   0.237659  -0.064912
    16  C    0.018841   0.107802  -0.076787   5.595221  -0.180666   0.337901
    17  C   -0.125483  -0.038865   0.237659  -0.180666   5.358317   0.067845
    18  C   -0.007397   0.029336  -0.064912   0.337901   0.067845   4.884674
    19  H    0.000978  -0.039004   0.006791   0.410854  -0.004152  -0.034116
    20  C    0.016715  -0.077758  -0.001087   0.063604   0.343824   0.361076
    21  H   -0.018262   0.005747  -0.036707  -0.001295   0.412510   0.004038
    22  H   -0.000081  -0.001662   0.006497   0.011793  -0.031028  -0.045546
    23  Br  -0.000058   0.017698  -0.001965  -0.104641   0.020146   0.383041
    24  O    0.725991   0.001631  -0.225659  -0.000333   0.049868   0.000669
              19         20         21         22         23         24
     1  C    0.000000   0.000001  -0.000003   0.000000   0.000000   0.000215
     2  C   -0.000003   0.000200  -0.000358   0.000003   0.000000   0.048825
     3  C   -0.000363  -0.006584   0.004439  -0.000017  -0.000011  -0.209394
     4  C    0.004726   0.002730  -0.000386   0.000001   0.000078   0.000641
     5  C   -0.000354  -0.000106  -0.000006   0.000000  -0.000003  -0.000370
     6  C   -0.000001  -0.000001   0.000001   0.000000   0.000000   0.000686
     7  H    0.000000   0.000000   0.000000   0.000000   0.000000  -0.000129
     8  H    0.000000  -0.000003  -0.000047   0.000000   0.000000   0.020520
     9  H   -0.000043   0.000001   0.000000   0.000000   0.000000   0.000007
    10  H    0.000000   0.000000   0.000000   0.000000   0.000000   0.000001
    11  C   -0.015122  -0.002662   0.000804   0.000176  -0.001936  -0.005409
    12  O    0.020222   0.000655   0.000007   0.000001   0.000056   0.000005
    13  C    0.000978   0.016715  -0.018262  -0.000081  -0.000058   0.725991
    14  C   -0.039004  -0.077758   0.005747  -0.001662   0.017698   0.001631
    15  C    0.006791  -0.001087  -0.036707   0.006497  -0.001965  -0.225659
    16  C    0.410854   0.063604  -0.001295   0.011793  -0.104641  -0.000333
    17  C   -0.004152   0.343824   0.412510  -0.031028   0.020146   0.049868
    18  C   -0.034116   0.361076   0.004038  -0.045546   0.383041   0.000669
    19  H    0.449230   0.010424   0.000041   0.000013  -0.004657   0.000008
    20  C    0.010424   5.129336  -0.023736   0.418331  -0.098469   0.000833
    21  H    0.000041  -0.023736   0.451004  -0.003031  -0.000192   0.020497
    22  H    0.000013   0.418331  -0.003031   0.456868  -0.004901  -0.000138
    23  Br  -0.004657  -0.098469  -0.000192  -0.004901  34.852475   0.000000
    24  O    0.000008   0.000833   0.020497  -0.000138   0.000000   7.996949
 Mulliken charges:
               1
     1  C   -0.132439
     2  C   -0.179465
     3  C    0.050096
     4  C    0.030232
     5  C   -0.174663
     6  C   -0.134284
     7  H    0.178151
     8  H    0.176935
     9  H    0.176677
    10  H    0.178253
    11  C    0.240155
    12  O   -0.382769
    13  C    0.236618
    14  C    0.043948
    15  C    0.037797
    16  C   -0.192855
    17  C   -0.181591
    18  C    0.076916
    19  H    0.194528
    20  C   -0.137323
    21  H    0.184937
    22  H    0.192724
    23  Br  -0.056662
    24  O   -0.425916
 Sum of Mulliken charges =   0.00000
 Mulliken charges with hydrogens summed into heavy atoms:
               1
     1  C    0.045713
     2  C   -0.002529
     3  C    0.050096
     4  C    0.030232
     5  C    0.002014
     6  C    0.043969
    11  C    0.240155
    12  O   -0.382769
    13  C    0.236618
    14  C    0.043948
    15  C    0.037797
    16  C    0.001673
    17  C    0.003346
    18  C    0.076916
    20  C    0.055401
    23  Br  -0.056662
    24  O   -0.425916
 Electronic spatial extent (au):  <R**2>=           6165.2929
 Charge=              0.0000 electrons
 Dipole moment (field-independent basis, Debye):
    X=              1.5847    Y=              0.1335    Z=              0.0002  Tot=              1.5903
 Quadrupole moment (field-independent basis, Debye-Ang):
   XX=            -83.0316   YY=           -118.6868   ZZ=           -111.9073
   XY=            -10.9439   XZ=             -0.0006   YZ=              0.0019
 Traceless Quadrupole moment (field-independent basis, Debye-Ang):
   XX=             21.5103   YY=            -14.1449   ZZ=             -7.3654
   XY=            -10.9439   XZ=             -0.0006   YZ=              0.0019
 Octapole moment (field-independent basis, Debye-Ang**2):
  XXX=             11.6833  YYY=            -16.5475  ZZZ=             -0.0030  XYY=            -65.8644
  XXY=            -25.0390  XXZ=             -0.0031  XZZ=            -50.0750  YZZ=             -4.9113
  YYZ=              0.0023  XYZ=             -0.0014
 Hexadecapole moment (field-independent basis, Debye-Ang**3):
 XXXX=          -4891.8671 YYYY=          -1491.3100 ZZZZ=           -124.3592 XXXY=            -33.7958
 XXXZ=             -0.0057 YYYX=            -59.7063 YYYZ=              0.0171 ZZZX=              0.0122
 ZZZY=             -0.0018 XXYY=          -1124.8663 XXZZ=          -1071.0775 YYZZ=           -256.9305
 XXYZ=              0.0035 YYXZ=              0.0021 ZZXY=             27.5478
 N-N= 1.373554867379D+03 E-N=-1.050112968382D+04  KE= 3.255255465022D+03
 Leave Link  601 at Thu Jan 16 07:05:39 2020, MaxMem=   134217728 cpu:         2.0
 (Enter E:\Gaussian\G09W\l9999.exe)
 1|1|UNPC-DESKTOP-K4OTQA5|SP|RM062X TD-FC|Gen|C14H7Br1O2|������|16-Jan-
 2020|0||#p td=(triplets,nstates=4,root=1) m062x/gen scrf=(solvent=acet
 onitrile,read) guess=save geom=connectivity empiricaldispersion=gd3||2
 -BrAQ excited triplet state energy||0,1|C,0,5.05585,0.085583,-0.000075
 |C,0,4.016053,0.998456,-0.000081|C,0,2.680535,0.562151,-0.000035|C,0,2
 .407672,-0.826375,0.00002|C,0,3.477394,-1.737963,0.000038|C,0,4.785978
 ,-1.292074,-0.000018|H,0,6.082126,0.435757,-0.00013|H,0,4.209986,2.063
 698,-0.000129|H,0,3.247053,-2.796117,0.000085|H,0,5.603116,-2.004625,-
 0.000016|C,0,1.03016,-1.348775,0.000055|O,0,0.781701,-2.564765,0.00011
 8|C,0,1.603219,1.556363,-0.000039|C,0,-0.044765,-0.355729,0.000013|C,0
 ,0.254288,1.089038,0.000074|C,0,-1.362596,-0.76975,0.|C,0,-0.839272,2.
 029511,0.000186|C,0,-2.393691,0.174281,0.000059|H,0,-1.576183,-1.83065
 1,-0.000025|C,0,-2.125167,1.600705,0.000198|H,0,-0.597591,3.083479,0.0
 00271|H,0,-2.954046,2.295834,0.000296|Br,0,-4.178873,-0.393248,-0.0000
 79|O,0,1.839819,2.805239,-0.000114||Version=IA32W-G09RevD.01|State=1-A
 |HF=-3262.3422587|RMSD=5.918e-009|PG=C01 [X(C14H7Br1O2)]||@


 ... IT IS NO ONE DREAME THAT
     CAN PLEASE THESE ALL ...

                -- BEN JONSON
 Job cpu time:       0 days  8 hours 31 minutes 18.0 seconds.
 File lengths (MBytes):  RWF=    612 Int=      0 D2E=      0 Chk=     55 Scr=      1
 Normal termination of Gaussian 09 at Thu Jan 16 07:05:45 2020.
