# Supplementary material for: 2-Bromoanthraquinone as a highly efficient photocatalyst for the oxidation of sec-aromatic alcohols: experimental and DFT study
Source: Royal Society of Chemistry journal article supplement (doi:10.1039/d0ra06414a), 2020-01-01
Supplement: d0ra06414a16.out [file d0ra06414a16.out]

 Entering Link 1 = E:\Gaussian\G09W\l1.exe PID=    135352.
  
 Copyright (c) 1988,1990,1992,1993,1995,1998,2003,2009,2013,
            Gaussian, Inc.  All Rights Reserved.
  
 This is part of the Gaussian(R) 09 program.  It is based on
 the Gaussian(R) 03 system (copyright 2003, Gaussian, Inc.),
 the Gaussian(R) 98 system (copyright 1998, Gaussian, Inc.),
 the Gaussian(R) 94 system (copyright 1995, Gaussian, Inc.),
 the Gaussian 92(TM) system (copyright 1992, Gaussian, Inc.),
 the Gaussian 90(TM) system (copyright 1990, Gaussian, Inc.),
 the Gaussian 88(TM) system (copyright 1988, Gaussian, Inc.),
 the Gaussian 86(TM) system (copyright 1986, Carnegie Mellon
 University), and the Gaussian 82(TM) system (copyright 1983,
 Carnegie Mellon University). Gaussian is a federally registered
 trademark of Gaussian, Inc.
  
 This software contains proprietary and confidential information,
 including trade secrets, belonging to Gaussian, Inc.
  
 This software is provided under written license and may be
 used, copied, transmitted, or stored only in accord with that
 written license.
  
 The following legend is applicable only to US Government
 contracts under FAR:
  
                    RESTRICTED RIGHTS LEGEND
  
 Use, reproduction and disclosure by the US Government is
 subject to restrictions as set forth in subparagraphs (a)
 and (c) of the Commercial Computer Software - Restricted
 Rights clause in FAR 52.227-19.
  
 Gaussian, Inc.
 340 Quinnipiac St., Bldg. 40, Wallingford CT 06492
  
  
 ---------------------------------------------------------------
 Warning -- This program may not be used in any manner that
 competes with the business of Gaussian, Inc. or will provide
 assistance to any competitor of Gaussian, Inc.  The licensee
 of this program is prohibited from giving any competitor of
 Gaussian, Inc. access to this program.  By using this program,
 the user acknowledges that Gaussian, Inc. is engaged in the
 business of creating and licensing software in the field of
 computational chemistry and represents and warrants to the
 licensee that it is not a competitor of Gaussian, Inc. and that
 it will not use this program in any manner prohibited above.
 ---------------------------------------------------------------
  

 Cite this work as:
 Gaussian 09, Revision D.01,
 M. J. Frisch, G. W. Trucks, H. B. Schlegel, G. E. Scuseria, 
 M. A. Robb, J. R. Cheeseman, G. Scalmani, V. Barone, B. Mennucci, 
 G. A. Petersson, H. Nakatsuji, M. Caricato, X. Li, H. P. Hratchian, 
 A. F. Izmaylov, J. Bloino, G. Zheng, J. L. Sonnenberg, M. Hada, 
 M. Ehara, K. Toyota, R. Fukuda, J. Hasegawa, M. Ishida, T. Nakajima, 
 Y. Honda, O. Kitao, H. Nakai, T. Vreven, J. A. Montgomery, Jr., 
 J. E. Peralta, F. Ogliaro, M. Bearpark, J. J. Heyd, E. Brothers, 
 K. N. Kudin, V. N. Staroverov, T. Keith, R. Kobayashi, J. Normand, 
 K. Raghavachari, A. Rendell, J. C. Burant, S. S. Iyengar, J. Tomasi, 
 M. Cossi, N. Rega, J. M. Millam, M. Klene, J. E. Knox, J. B. Cross, 
 V. Bakken, C. Adamo, J. Jaramillo, R. Gomperts, R. E. Stratmann, 
 O. Yazyev, A. J. Austin, R. Cammi, C. Pomelli, J. W. Ochterski, 
 R. L. Martin, K. Morokuma, V. G. Zakrzewski, G. A. Voth, 
 P. Salvador, J. J. Dannenberg, S. Dapprich, A. D. Daniels, 
 O. Farkas, J. B. Foresman, J. V. Ortiz, J. Cioslowski, 
 and D. J. Fox, Gaussian, Inc., Wallingford CT, 2013.
 
 ******************************************
 Gaussian 09:  IA32W-G09RevD.01 24-Apr-2013
                12-Jan-2020 
 ******************************************
 %nprocshared=2
 Will use up to    2 processors via shared memory.
 %mem=1GB
 %chk=E:\Gaussian file\error\2-BrAQ excited triplet state opt.chk
 ----------------------------------------------------------------------
 #p opt td=(triplets,nstates=5,root=1) b3lyp/6-311g(d) scrf=(solvent=ac
 etonitrile,read) guess=save geom=connectivity empiricaldispersion=gd3b
 j
 ----------------------------------------------------------------------
 1/14=-1,18=20,19=15,26=3,38=1,40=2,57=2/1,3;
 2/9=110,12=2,17=6,18=5,40=1/2;
 3/5=4,6=6,7=1,11=9,16=1,25=1,30=1,70=2203,71=1,72=2,74=-5,124=41/1,2,8,3;
 4//1;
 5/5=2,38=5,53=2/2;
 8/6=1,10=2,107=1,108=5/1;
 9/8=1,15=2,41=5,42=1,48=3,70=2/14;
 10/5=4/2;
 6/7=2,8=2,9=2,10=2/1;
 7/12=6,13=5,14=1/1,2,3,16;
 1/14=-1,18=20,19=15,26=3/3(2);
 2/9=110/2;
 99//99;
 2/9=110/2;
 3/5=4,6=6,7=1,11=9,16=1,25=1,30=1,70=2205,71=1,72=2,74=-5,124=41/1,2,8,3;
 4/5=5,16=3,69=1/1;
 5/5=2,38=5,53=2/2;
 8/6=1,10=2,107=1,108=5/1;
 9/8=1,15=2,41=5,42=1,48=3,49=4,70=2/14;
 10/5=4/2;
 7/12=6,13=5,14=1/1,2,3,16;
 1/14=-1,18=20,19=15,26=3/3(-8);
 2/9=110/2;
 6/7=2,8=2,9=2,10=2/1;
 99//99;
 Leave Link    1 at Sun Jan 12 14:41:13 2020, MaxMem=   134217728 cpu:         0.0
 (Enter E:\Gaussian\G09W\l101.exe)
 --------------------------------
 2-BrAQ excited triplet state opt
 --------------------------------
 Symbolic Z-matrix:
 Charge =  0 Multiplicity = 1
 C                    -5.04394   0.07305   0.23191 
 C                    -4.01462   0.98964   0.10593 
 C                    -2.67957   0.5621   -0.02432 
 C                    -2.40103  -0.82587  -0.0412 
 C                    -3.46276  -1.74547   0.08769 
 C                    -4.76571  -1.3049    0.2259 
 H                    -6.06614   0.42007   0.33945 
 H                    -4.21787   2.05384   0.11153 
 H                    -3.23608  -2.80473   0.07801 
 H                    -5.57194  -2.0229    0.33148 
 C                    -1.0312   -1.33595  -0.18793 
 O                    -0.78457  -2.54395  -0.37161 
 C                    -1.61433   1.5644   -0.10785 
 C                     0.04166  -0.34369  -0.10846 
 C                    -0.25811   1.08656  -0.07874 
 C                     1.36062  -0.76084  -0.0435 
 C                     0.83675   2.02813  -0.02735 
 C                     2.39245   0.1863    0.02721 
 H                     1.58524  -1.81962  -0.05462 
 C                     2.12569   1.60078   0.03828 
 H                     0.59687   3.08273  -0.02506 
 H                     2.94663   2.3038    0.09711 
 Br                    4.17336  -0.39888   0.09057 
 O                    -1.84291   2.8067   -0.20756 
 
 NAtoms=     24 NQM=       24 NQMF=       0 NMMI=      0 NMMIF=      0
                NMic=       0 NMicF=      0.
                    Isotopes and Nuclear Properties:
 (Nuclear quadrupole moments (NQMom) in fm**2, nuclear magnetic moments (NMagM)
  in nuclear magnetons)

  Atom         1           2           3           4           5           6           7           8           9          10
 IAtWgt=          12          12          12          12          12          12           1           1           1           1
 AtmWgt=  12.0000000  12.0000000  12.0000000  12.0000000  12.0000000  12.0000000   1.0078250   1.0078250   1.0078250   1.0078250
 NucSpn=           0           0           0           0           0           0           1           1           1           1
 AtZEff=   0.0000000   0.0000000   0.0000000   0.0000000   0.0000000   0.0000000   0.0000000   0.0000000   0.0000000   0.0000000
 NQMom=    0.0000000   0.0000000   0.0000000   0.0000000   0.0000000   0.0000000   0.0000000   0.0000000   0.0000000   0.0000000
 NMagM=    0.0000000   0.0000000   0.0000000   0.0000000   0.0000000   0.0000000   2.7928460   2.7928460   2.7928460   2.7928460
 AtZNuc=   6.0000000   6.0000000   6.0000000   6.0000000   6.0000000   6.0000000   1.0000000   1.0000000   1.0000000   1.0000000

  Atom        11          12          13          14          15          16          17          18          19          20
 IAtWgt=          12          16          12          12          12          12          12          12           1          12
 AtmWgt=  12.0000000  15.9949146  12.0000000  12.0000000  12.0000000  12.0000000  12.0000000  12.0000000   1.0078250  12.0000000
 NucSpn=           0           0           0           0           0           0           0           0           1           0
 AtZEff=   0.0000000   0.0000000   0.0000000   0.0000000   0.0000000   0.0000000   0.0000000   0.0000000   0.0000000   0.0000000
 NQMom=    0.0000000   0.0000000   0.0000000   0.0000000   0.0000000   0.0000000   0.0000000   0.0000000   0.0000000   0.0000000
 NMagM=    0.0000000   0.0000000   0.0000000   0.0000000   0.0000000   0.0000000   0.0000000   0.0000000   2.7928460   0.0000000
 AtZNuc=   6.0000000   8.0000000   6.0000000   6.0000000   6.0000000   6.0000000   6.0000000   6.0000000   1.0000000   6.0000000

  Atom        21          22          23          24
 IAtWgt=           1           1          79          16
 AtmWgt=   1.0078250   1.0078250  78.9183361  15.9949146
 NucSpn=           1           1           3           0
 AtZEff=   0.0000000   0.0000000   0.0000000   0.0000000
 NQMom=    0.0000000   0.0000000  31.3000000   0.0000000
 NMagM=    2.7928460   2.7928460   2.1063990   0.0000000
 AtZNuc=   1.0000000   1.0000000  35.0000000   8.0000000
 Leave Link  101 at Sun Jan 12 14:41:14 2020, MaxMem=   134217728 cpu:         0.0
 (Enter E:\Gaussian\G09W\l103.exe)

 GradGradGradGradGradGradGradGradGradGradGradGradGradGradGradGradGradGrad
 Berny optimization.
 Initialization pass.
                           ----------------------------
                           !    Initial Parameters    !
                           ! (Angstroms and Degrees)  !
 --------------------------                            --------------------------
 ! Name  Definition              Value          Derivative Info.                !
 --------------------------------------------------------------------------------
 ! R1    R(1,2)                  1.384          estimate D2E/DX2                !
 ! R2    R(1,6)                  1.4058         estimate D2E/DX2                !
 ! R3    R(1,7)                  1.0848         estimate D2E/DX2                !
 ! R4    R(2,3)                  1.4079         estimate D2E/DX2                !
 ! R5    R(2,8)                  1.0835         estimate D2E/DX2                !
 ! R6    R(3,4)                  1.4157         estimate D2E/DX2                !
 ! R7    R(3,13)                 1.465          estimate D2E/DX2                !
 ! R8    R(4,5)                  1.4105         estimate D2E/DX2                !
 ! R9    R(4,11)                 1.4691         estimate D2E/DX2                !
 ! R10   R(5,6)                  1.3823         estimate D2E/DX2                !
 ! R11   R(5,9)                  1.0833         estimate D2E/DX2                !
 ! R12   R(6,10)                 1.0847         estimate D2E/DX2                !
 ! R13   R(11,12)                1.2465         estimate D2E/DX2                !
 ! R14   R(11,14)                1.4635         estimate D2E/DX2                !
 ! R15   R(13,15)                1.4382         estimate D2E/DX2                !
 ! R16   R(13,24)                1.2671         estimate D2E/DX2                !
 ! R17   R(14,15)                1.4616         estimate D2E/DX2                !
 ! R18   R(14,16)                1.3849         estimate D2E/DX2                !
 ! R19   R(15,17)                1.445          estimate D2E/DX2                !
 ! R20   R(16,18)                1.4024         estimate D2E/DX2                !
 ! R21   R(16,19)                1.0824         estimate D2E/DX2                !
 ! R22   R(17,20)                1.3595         estimate D2E/DX2                !
 ! R23   R(17,21)                1.0815         estimate D2E/DX2                !
 ! R24   R(18,20)                1.4395         estimate D2E/DX2                !
 ! R25   R(18,23)                1.8757         estimate D2E/DX2                !
 ! R26   R(20,22)                1.0824         estimate D2E/DX2                !
 ! A1    A(2,1,6)              120.1038         estimate D2E/DX2                !
 ! A2    A(2,1,7)              119.8642         estimate D2E/DX2                !
 ! A3    A(6,1,7)              120.0315         estimate D2E/DX2                !
 ! A4    A(1,2,3)              120.8339         estimate D2E/DX2                !
 ! A5    A(1,2,8)              120.6981         estimate D2E/DX2                !
 ! A6    A(3,2,8)              118.4669         estimate D2E/DX2                !
 ! A7    A(2,3,4)              119.0384         estimate D2E/DX2                !
 ! A8    A(2,3,13)             119.1442         estimate D2E/DX2                !
 ! A9    A(4,3,13)             121.8024         estimate D2E/DX2                !
 ! A10   A(3,4,5)              119.3392         estimate D2E/DX2                !
 ! A11   A(3,4,11)             121.6718         estimate D2E/DX2                !
 ! A12   A(5,4,11)             118.9889         estimate D2E/DX2                !
 ! A13   A(4,5,6)              120.7203         estimate D2E/DX2                !
 ! A14   A(4,5,9)              118.631          estimate D2E/DX2                !
 ! A15   A(6,5,9)              120.6486         estimate D2E/DX2                !
 ! A16   A(1,6,5)              119.9595         estimate D2E/DX2                !
 ! A17   A(1,6,10)             120.0843         estimate D2E/DX2                !
 ! A18   A(5,6,10)             119.9561         estimate D2E/DX2                !
 ! A19   A(4,11,12)            122.3911         estimate D2E/DX2                !
 ! A20   A(4,11,14)            116.2773         estimate D2E/DX2                !
 ! A21   A(12,11,14)           121.3315         estimate D2E/DX2                !
 ! A22   A(3,13,15)            117.206          estimate D2E/DX2                !
 ! A23   A(3,13,24)            122.962          estimate D2E/DX2                !
 ! A24   A(15,13,24)           119.8314         estimate D2E/DX2                !
 ! A25   A(11,14,15)           120.9434         estimate D2E/DX2                !
 ! A26   A(11,14,16)           119.7686         estimate D2E/DX2                !
 ! A27   A(15,14,16)           119.2831         estimate D2E/DX2                !
 ! A28   A(13,15,14)           121.2044         estimate D2E/DX2                !
 ! A29   A(13,15,17)           119.9159         estimate D2E/DX2                !
 ! A30   A(14,15,17)           118.8787         estimate D2E/DX2                !
 ! A31   A(14,16,18)           119.9778         estimate D2E/DX2                !
 ! A32   A(14,16,19)           119.4595         estimate D2E/DX2                !
 ! A33   A(18,16,19)           120.5615         estimate D2E/DX2                !
 ! A34   A(15,17,20)           121.0149         estimate D2E/DX2                !
 ! A35   A(15,17,21)           117.8663         estimate D2E/DX2                !
 ! A36   A(20,17,21)           121.11           estimate D2E/DX2                !
 ! A37   A(16,18,20)           121.8497         estimate D2E/DX2                !
 ! A38   A(16,18,23)           119.3134         estimate D2E/DX2                !
 ! A39   A(20,18,23)           118.8334         estimate D2E/DX2                !
 ! A40   A(17,20,18)           118.9604         estimate D2E/DX2                !
 ! A41   A(17,20,22)           121.1661         estimate D2E/DX2                !
 ! A42   A(18,20,22)           119.8734         estimate D2E/DX2                !
 ! D1    D(6,1,2,3)             -0.2489         estimate D2E/DX2                !
 ! D2    D(6,1,2,8)           -179.8654         estimate D2E/DX2                !
 ! D3    D(7,1,2,3)            179.5021         estimate D2E/DX2                !
 ! D4    D(7,1,2,8)             -0.1145         estimate D2E/DX2                !
 ! D5    D(2,1,6,5)             -0.3016         estimate D2E/DX2                !
 ! D6    D(2,1,6,10)           179.5809         estimate D2E/DX2                !
 ! D7    D(7,1,6,5)            179.9479         estimate D2E/DX2                !
 ! D8    D(7,1,6,10)            -0.1696         estimate D2E/DX2                !
 ! D9    D(1,2,3,4)              0.7527         estimate D2E/DX2                !
 ! D10   D(1,2,3,13)          -177.8641         estimate D2E/DX2                !
 ! D11   D(8,2,3,4)           -179.6224         estimate D2E/DX2                !
 ! D12   D(8,2,3,13)             1.7608         estimate D2E/DX2                !
 ! D13   D(2,3,4,5)             -0.7106         estimate D2E/DX2                !
 ! D14   D(2,3,4,11)           179.3773         estimate D2E/DX2                !
 ! D15   D(13,3,4,5)           177.868          estimate D2E/DX2                !
 ! D16   D(13,3,4,11)           -2.0442         estimate D2E/DX2                !
 ! D17   D(2,3,13,15)          172.7526         estimate D2E/DX2                !
 ! D18   D(2,3,13,24)           -7.5208         estimate D2E/DX2                !
 ! D19   D(4,3,13,15)           -5.8244         estimate D2E/DX2                !
 ! D20   D(4,3,13,24)          173.9021         estimate D2E/DX2                !
 ! D21   D(3,4,5,6)              0.1752         estimate D2E/DX2                !
 ! D22   D(3,4,5,9)           -179.7134         estimate D2E/DX2                !
 ! D23   D(11,4,5,6)          -179.9103         estimate D2E/DX2                !
 ! D24   D(11,4,5,9)             0.2012         estimate D2E/DX2                !
 ! D25   D(3,4,11,12)         -170.8442         estimate D2E/DX2                !
 ! D26   D(3,4,11,14)            9.0823         estimate D2E/DX2                !
 ! D27   D(5,4,11,12)            9.2433         estimate D2E/DX2                !
 ! D28   D(5,4,11,14)         -170.8302         estimate D2E/DX2                !
 ! D29   D(4,5,6,1)              0.3349         estimate D2E/DX2                !
 ! D30   D(4,5,6,10)          -179.5478         estimate D2E/DX2                !
 ! D31   D(9,5,6,1)           -179.7788         estimate D2E/DX2                !
 ! D32   D(9,5,6,10)             0.3385         estimate D2E/DX2                !
 ! D33   D(4,11,14,15)          -8.4633         estimate D2E/DX2                !
 ! D34   D(4,11,14,16)         170.7261         estimate D2E/DX2                !
 ! D35   D(12,11,14,15)        171.464          estimate D2E/DX2                !
 ! D36   D(12,11,14,16)         -9.3466         estimate D2E/DX2                !
 ! D37   D(3,13,15,14)           6.339          estimate D2E/DX2                !
 ! D38   D(3,13,15,17)        -174.0413         estimate D2E/DX2                !
 ! D39   D(24,13,15,14)       -173.3966         estimate D2E/DX2                !
 ! D40   D(24,13,15,17)          6.2232         estimate D2E/DX2                !
 ! D41   D(11,14,15,13)          0.8689         estimate D2E/DX2                !
 ! D42   D(11,14,15,17)       -178.7547         estimate D2E/DX2                !
 ! D43   D(16,14,15,13)       -178.3243         estimate D2E/DX2                !
 ! D44   D(16,14,15,17)          2.0521         estimate D2E/DX2                !
 ! D45   D(11,14,16,18)        179.7376         estimate D2E/DX2                !
 ! D46   D(11,14,16,19)          0.1467         estimate D2E/DX2                !
 ! D47   D(15,14,16,18)         -1.0595         estimate D2E/DX2                !
 ! D48   D(15,14,16,19)        179.3496         estimate D2E/DX2                !
 ! D49   D(13,15,17,20)        178.1616         estimate D2E/DX2                !
 ! D50   D(13,15,17,21)         -0.7758         estimate D2E/DX2                !
 ! D51   D(14,15,17,20)         -2.2098         estimate D2E/DX2                !
 ! D52   D(14,15,17,21)        178.8527         estimate D2E/DX2                !
 ! D53   D(14,16,18,20)          0.1603         estimate D2E/DX2                !
 ! D54   D(14,16,18,23)       -179.1606         estimate D2E/DX2                !
 ! D55   D(19,16,18,20)        179.7466         estimate D2E/DX2                !
 ! D56   D(19,16,18,23)          0.4257         estimate D2E/DX2                !
 ! D57   D(15,17,20,18)          1.3211         estimate D2E/DX2                !
 ! D58   D(15,17,20,22)       -178.747          estimate D2E/DX2                !
 ! D59   D(21,17,20,18)       -179.7761         estimate D2E/DX2                !
 ! D60   D(21,17,20,22)          0.1559         estimate D2E/DX2                !
 ! D61   D(16,18,20,17)         -0.2781         estimate D2E/DX2                !
 ! D62   D(16,18,20,22)        179.789          estimate D2E/DX2                !
 ! D63   D(23,18,20,17)        179.0459         estimate D2E/DX2                !
 ! D64   D(23,18,20,22)         -0.887          estimate D2E/DX2                !
 --------------------------------------------------------------------------------
 Trust Radius=3.00D-01 FncErr=1.00D-07 GrdErr=1.00D-06
 Number of steps in this run=    142 maximum allowed number of steps=    144.
 GradGradGradGradGradGradGradGradGradGradGradGradGradGradGradGradGradGrad

 Leave Link  103 at Sun Jan 12 14:41:15 2020, MaxMem=   134217728 cpu:         1.0
 (Enter E:\Gaussian\G09W\l202.exe)
                          Input orientation:                          
 ---------------------------------------------------------------------
 Center     Atomic      Atomic             Coordinates (Angstroms)
 Number     Number       Type             X           Y           Z
 ---------------------------------------------------------------------
      1          6           0       -5.043945    0.073050    0.231911
      2          6           0       -4.014624    0.989642    0.105925
      3          6           0       -2.679570    0.562098   -0.024320
      4          6           0       -2.401026   -0.825869   -0.041200
      5          6           0       -3.462764   -1.745465    0.087690
      6          6           0       -4.765705   -1.304902    0.225896
      7          1           0       -6.066136    0.420074    0.339452
      8          1           0       -4.217872    2.053844    0.111526
      9          1           0       -3.236079   -2.804725    0.078009
     10          1           0       -5.571940   -2.022896    0.331483
     11          6           0       -1.031203   -1.335949   -0.187928
     12          8           0       -0.784565   -2.543950   -0.371607
     13          6           0       -1.614329    1.564403   -0.107849
     14          6           0        0.041661   -0.343694   -0.108459
     15          6           0       -0.258106    1.086563   -0.078744
     16          6           0        1.360620   -0.760843   -0.043504
     17          6           0        0.836753    2.028129   -0.027346
     18          6           0        2.392445    0.186300    0.027209
     19          1           0        1.585243   -1.819619   -0.054616
     20          6           0        2.125691    1.600783    0.038281
     21          1           0        0.596874    3.082729   -0.025056
     22          1           0        2.946628    2.303797    0.097109
     23         35           0        4.173364   -0.398877    0.090574
     24          8           0       -1.842914    2.806700   -0.207562
 ---------------------------------------------------------------------
                    Distance matrix (angstroms):
                    1          2          3          4          5
     1  C    0.000000
     2  C    1.384021   0.000000
     3  C    2.427981   1.407880   0.000000
     4  C    2.804936   2.433398   1.415742   0.000000
     5  C    2.414111   2.790285   2.439423   1.410517   0.000000
     6  C    1.405776   2.417322   2.810739   2.427451   1.382336
     7  H    1.084834   2.141879   3.409007   3.889769   3.395657
     8  H    2.149519   1.083451   2.147122   3.408372   3.873694
     9  H    3.402007   3.873517   3.414040   2.151138   1.083287
    10  H    2.163720   3.398749   3.895458   3.409760   2.141267
    11  C    4.273598   3.794143   2.519219   1.469056   2.481161
    12  O    5.035399   4.811194   3.655022   2.381999   2.832187
    13  C    3.755241   2.477391   1.465036   2.517287   3.796073
    14  C    5.113992   4.275183   2.869257   2.490730   3.779475
    15  C    4.901833   3.762303   2.478208   2.872440   4.279943
    16  C    6.464494   5.655066   4.251315   3.762209   4.924604
    17  C    6.202593   4.963071   3.809696   4.316099   5.721808
    18  C    7.440069   6.457715   5.086179   4.899646   6.165942
    19  H    6.900031   6.267075   4.884887   4.108292   5.050557
    20  C    7.333154   6.171024   4.916637   5.136743   6.513881
    21  H    6.398675   5.065973   4.133844   4.925932   6.309107
    22  H    8.297208   7.084216   5.890871   6.197688   7.581353
    23  Br   9.230465   8.304900   6.920938   6.589559   7.753951
    24  O    4.232325   2.848912   2.402459   3.678957   4.840795
                    6          7          8          9         10
     6  C    0.000000
     7  H    2.163229   0.000000
     8  H    3.405052   2.477344   0.000000
     9  H    2.147346   4.298477   4.956887   0.000000
    10  H    1.084748   2.492468   4.301359   2.476238   0.000000
    11  C    3.757488   5.358386   4.662106   2.662612   4.621685
    12  O    4.212093   6.098035   5.758535   2.506009   4.866702
    13  C    4.274982   4.618241   2.658216   4.664107   5.359516
    14  C    4.913907   6.171641   4.892873   4.103051   5.875865
    15  C    5.111786   5.861084   4.080635   4.902552   6.170401
    16  C    6.156333   7.529802   6.250286   5.032083   7.056471
    17  C    6.523861   7.097201   5.056598   6.321039   7.590185
    18  C    7.314525   8.467570   6.869579   6.374096   8.270705
    19  H    6.377943   7.982175   6.979073   4.922720   7.170472
    20  C    7.481280   8.281957   6.360143   6.939644   8.512963
    21  H    6.933364   7.184588   4.925346   7.025971   8.015534
    22  H    8.515831   9.210703   7.168873   8.020176   9.557259
    23  Br   8.985886  10.275212   8.742375   7.790257   9.882632
    24  O    5.063187   4.881681   2.511779   5.788830   6.125455
                   11         12         13         14         15
    11  C    0.000000
    12  O    1.246529   0.000000
    13  C    2.959475   4.199600   0.000000
    14  C    1.463531   2.364957   2.526487   0.000000
    15  C    2.545224   3.680157   1.438235   1.461635   0.000000
    16  C    2.464229   2.808726   3.776404   1.384877   2.456507
    17  C    3.851242   4.863239   2.495862   2.502857   1.444958
    18  C    3.752984   4.207934   4.239298   2.413604   2.801271
    19  H    2.664113   2.498225   4.657435   2.136328   3.441571
    20  C    4.317586   5.080985   3.743051   2.854068   2.441435
    21  H    4.711887   5.804135   2.683577   3.472116   2.172223
    22  H    5.399272   6.135320   4.625045   3.935772   3.432623
    23  Br   5.295582   5.421809   6.114837   4.136862   4.676871
    24  O    4.221469   5.456782   1.267082   3.672387   2.342452
                   16         17         18         19         20
    16  C    0.000000
    17  C    2.837792   0.000000
    18  C    1.402406   2.411532   0.000000
    19  H    1.082398   3.919968   2.163789   0.000000
    20  C    2.483808   1.359519   1.439459   3.464082   0.000000
    21  H    3.918762   1.081540   3.408241   5.001076   2.130131
    22  H    3.453580   2.131444   2.189931   4.344991   1.082417
    23  Br   2.839106   4.127619   1.875665   2.956004   2.862576
    24  O    4.797594   2.796295   4.985968   5.760076   4.155057
                   21         22         23         24
    21  H    0.000000
    22  H    2.478508   0.000000
    23  Br   4.992618   2.968058   0.000000
    24  O    2.462126   4.825500   6.823504   0.000000
 Stoichiometry    C14H7BrO2
 Framework group  C1[X(C14H7BrO2)]
 Deg. of freedom    66
 Full point group                 C1      NOp   1
 Largest Abelian subgroup         C1      NOp   1
 Largest concise Abelian subgroup C1      NOp   1
                         Standard orientation:                         
 ---------------------------------------------------------------------
 Center     Atomic      Atomic             Coordinates (Angstroms)
 Number     Number       Type             X           Y           Z
 ---------------------------------------------------------------------
      1          6           0        5.043945    0.073050   -0.231911
      2          6           0        4.014624    0.989642   -0.105925
      3          6           0        2.679570    0.562098    0.024320
      4          6           0        2.401026   -0.825869    0.041200
      5          6           0        3.462764   -1.745465   -0.087690
      6          6           0        4.765705   -1.304902   -0.225896
      7          1           0        6.066136    0.420073   -0.339452
      8          1           0        4.217872    2.053844   -0.111526
      9          1           0        3.236079   -2.804725   -0.078009
     10          1           0        5.571940   -2.022896   -0.331483
     11          6           0        1.031203   -1.335949    0.187928
     12          8           0        0.784565   -2.543950    0.371607
     13          6           0        1.614329    1.564403    0.107849
     14          6           0       -0.041661   -0.343694    0.108459
     15          6           0        0.258106    1.086563    0.078744
     16          6           0       -1.360620   -0.760843    0.043504
     17          6           0       -0.836753    2.028129    0.027346
     18          6           0       -2.392445    0.186300   -0.027209
     19          1           0       -1.585243   -1.819619    0.054616
     20          6           0       -2.125691    1.600783   -0.038281
     21          1           0       -0.596874    3.082729    0.025056
     22          1           0       -2.946628    2.303797   -0.097109
     23         35           0       -4.173364   -0.398876   -0.090574
     24          8           0        1.842914    2.806700    0.207562
 ---------------------------------------------------------------------
 Rotational constants (GHZ):      0.9772626      0.1796309      0.1523004
 Leave Link  202 at Sun Jan 12 14:41:15 2020, MaxMem=   134217728 cpu:         0.0
 (Enter E:\Gaussian\G09W\l301.exe)
 Standard basis: 6-311G(d) (5D, 7F)
 Ernie: Thresh=  0.10000D-02 Tol=  0.10000D-05 Strict=F.
 There are   372 symmetry adapted cartesian basis functions of A   symmetry.
 There are   353 symmetry adapted basis functions of A   symmetry.
   353 basis functions,   637 primitive gaussians,   372 cartesian basis functions
    71 alpha electrons       71 beta electrons
       nuclear repulsion energy      1373.2034472471 Hartrees.
 IExCor=  402 DFT=T Ex+Corr=B3LYP ExCW=0 ScaHFX=  0.200000
 ScaDFX=  0.800000  0.720000  1.000000  0.810000 ScalE2=  1.000000  1.000000
 IRadAn=      0 IRanWt=     -1 IRanGd=            0 ICorTp=0 IEmpDi=141
 NAtoms=   24 NActive=   24 NUniq=   24 SFac= 1.00D+00 NAtFMM=   60 NAOKFM=F Big=F
 Integral buffers will be    262144 words long.
 Regular integral format.
 Two-electron integral symmetry is turned on.
 R6Disp:  Grimme-D3(BJ) Dispersion energy=       -0.0619413586 Hartrees.
 Nuclear repulsion after empirical dispersion term =     1373.1415058885 Hartrees.
 Using the following non-standard input for PCM:
 --- end of non-standard input.
 ------------------------------------------------------------------------------
 Polarizable Continuum Model (PCM)
 =================================
 Model                : PCM (using non-symmetric T matrix).
 Atomic radii         : UFF (Universal Force Field).
 Polarization charges : Total charges.
 Charge compensation  : None.
 Solution method      : On-the-fly selection.
 Cavity type          : Scaled VdW (van der Waals Surface) (Alpha=1.100).
 Cavity algorithm     : GePol (No added spheres)
                        Default sphere list used, NSphG=   24.
                        Lebedev-Laikov grids with approx.  5.0 points / Ang**2.
                        Smoothing algorithm: Karplus/York (Gamma=1.0000).
                        Polarization charges: spherical gaussians, with
                                              point-specific exponents (IZeta= 3).
                        Self-potential: point-specific (ISelfS= 7).
                        Self-field    : sphere-specific E.n sum rule (ISelfD= 2).
 1st derivatives      : Analytical E(r).r(x)/FMM algorithm (CHGder, D1EAlg=3).
                        Cavity 1st derivative terms included.
 Solvent              : Acetonitrile, Eps=  35.688000 Eps(inf)=   1.806874
 ------------------------------------------------------------------------------
 GePol: Number of generator spheres                  =      24
 GePol: Total number of spheres                      =      24
 GePol: Number of exposed spheres                    =      24 (100.00%)
 GePol: Number of points                             =    2161
 GePol: Average weight of points                     =       0.13
 GePol: Minimum weight of points                     =   0.10D-09
 GePol: Maximum weight of points                     =    0.20577
 GePol: Number of points with low weight             =     118
 GePol: Fraction of low-weight points (<1% of avg)   =       5.46%
 GePol: Cavity surface area                          =    280.938 Ang**2
 GePol: Cavity volume                                =    306.735 Ang**3
 Leave Link  301 at Sun Jan 12 14:41:17 2020, MaxMem=   134217728 cpu:         1.0
 (Enter E:\Gaussian\G09W\l302.exe)
 NPDir=0 NMtPBC=     1 NCelOv=     1 NCel=       1 NClECP=     1 NCelD=      1
         NCelK=      1 NCelE2=     1 NClLst=     1 CellRange=     0.0.
 One-electron integrals computed using PRISM.
 NBasis=   353 RedAO= T EigKep=  1.06D-04  NBF=   353
 NBsUse=   353 1.00D-06 EigRej= -1.00D+00 NBFU=   353
 Precomputing XC quadrature grid using
 IXCGrd= 4 IRadAn=           0 IRanWt=          -1 IRanGd=           0 AccXCQ= 0.00D+00.
 Generated NRdTot=       0 NPtTot=           0 NUsed=           0 NTot=          16
 NSgBfM=   363   363   363   363   363 MxSgAt=    24 MxSgA2=    24.
 Leave Link  302 at Sun Jan 12 14:41:23 2020, MaxMem=   134217728 cpu:         5.0
 (Enter E:\Gaussian\G09W\l308.exe)
 Leave Link  308 at Sun Jan 12 14:41:26 2020, MaxMem=   134217728 cpu:         2.0
 (Enter E:\Gaussian\G09W\l303.exe)
 DipDrv:  MaxL=1.
 Leave Link  303 at Sun Jan 12 14:41:27 2020, MaxMem=   134217728 cpu:         1.0
 (Enter E:\Gaussian\G09W\l401.exe)
 ExpMin= 1.03D-01 ExpMax= 4.40D+05 ExpMxC= 1.51D+04 IAcc=2 IRadAn=         4 AccDes= 0.00D+00
 Harris functional with IExCor=  402 and IRadAn=       4 diagonalized for initial guess.
 HarFok:  IExCor=  402 AccDes= 0.00D+00 IRadAn=         4 IDoV= 1 UseB2=F ITyADJ=14
 ICtDFT=  3500011 ScaDFX=  1.000000  1.000000  1.000000  1.000000
 FoFCou: FMM=F IPFlag=           0 FMFlag=      100000 FMFlg1=           0
         NFxFlg=           0 DoJE=T BraDBF=F KetDBF=T FulRan=T
         wScrn=  0.000000 ICntrl=     500 IOpCl=  0 I1Cent=   200000004 NGrid=           0
         NMat0=    1 NMatS0=      1 NMatT0=    0 NMatD0=    1 NMtDS0=    0 NMtDT0=    0
 Petite list used in FoFCou.
 Harris En= -3262.59036253957    
 JPrj=0 DoOrth=F DoCkMO=F.
 Leave Link  401 at Sun Jan 12 14:41:52 2020, MaxMem=   134217728 cpu:        24.0
 (Enter E:\Gaussian\G09W\l502.exe)
 Closed shell SCF:
 Using DIIS extrapolation, IDIIS=  1040.
 Integral symmetry usage will be decided dynamically.
 IVT=      438130 IEndB=      438130 NGot=   134217728 MDV=   133934995
 LenX=   133934995 LenY=   133796170
 Requested convergence on RMS density matrix=1.00D-08 within 128 cycles.
 Requested convergence on MAX density matrix=1.00D-06.
 Requested convergence on             energy=1.00D-06.
 No special actions if energy rises.
 Fock matrices will be formed incrementally for  20 cycles.

 Cycle   1  Pass 1  IDiag  1:
 FoFJK:  IHMeth= 1 ICntrl=       0 DoSepK=F KAlg= 0 I1Cent=   0 FoldK=F
 IRaf= 780000000 NMat=   1 IRICut=       1 DoRegI=T DoRafI=F ISym2E= 0.
 FoFCou: FMM=F IPFlag=           0 FMFlag=      100000 FMFlg1=           0
         NFxFlg=           0 DoJE=F BraDBF=F KetDBF=F FulRan=T
         wScrn=  0.000000 ICntrl=       0 IOpCl=  0 I1Cent=           0 NGrid=           0
         NMat0=    1 NMatS0=      1 NMatT0=    0 NMatD0=    1 NMtDS0=    0 NMtDT0=    0
 Symmetry not used in FoFCou.
 Inv3:  Mode=1 IEnd=    14009763.
 Iteration    1 A*A^-1 deviation from unit magnitude is 2.33D-15 for    432.
 Iteration    1 A*A^-1 deviation from orthogonality  is 2.49D-15 for   1604   1456.
 Iteration    1 A^-1*A deviation from unit magnitude is 2.22D-15 for    172.
 Iteration    1 A^-1*A deviation from orthogonality  is 1.03D-12 for   1841   1839.
 E= -3262.18827841113    
 DIIS: error= 1.05D-01 at cycle   1 NSaved=   1.
 NSaved= 1 IEnMin= 1 EnMin= -3262.18827841113     IErMin= 1 ErrMin= 1.05D-01
 ErrMax= 1.05D-01  0.00D+00 EMaxC= 1.00D-01 BMatC= 1.57D+00 BMatP= 1.57D+00
 IDIUse=3 WtCom= 0.00D+00 WtEn= 1.00D+00
 Coeff-Com:  0.100D+01
 Coeff-En:   0.100D+01
 Coeff:      0.100D+01
 Gap=     0.154 Goal=   None    Shift=    0.000
 GapD=    0.154 DampG=1.000 DampE=0.250 DampFc=0.2500 IDamp=-1.
 Damping current iteration by 2.50D-01
 RMSDP=8.23D-03 MaxDP=3.19D-01              OVMax= 2.73D-01

 Cycle   2  Pass 1  IDiag  1:
 RMSU=  2.05D-03    CP:  1.01D+00
 E= -3262.30662505433     Delta-E=       -0.118346643197 Rises=F Damp=T
 DIIS: error= 7.08D-02 at cycle   2 NSaved=   2.
 NSaved= 2 IEnMin= 2 EnMin= -3262.30662505433     IErMin= 2 ErrMin= 7.08D-02
 ErrMax= 7.08D-02  0.00D+00 EMaxC= 1.00D-01 BMatC= 6.53D-01 BMatP= 1.57D+00
 IDIUse=3 WtCom= 2.92D-01 WtEn= 7.08D-01
 Coeff-Com: -0.126D+01 0.226D+01
 Coeff-En:   0.000D+00 0.100D+01
 Coeff:     -0.369D+00 0.137D+01
 Gap=     0.151 Goal=   None    Shift=    0.000
 RMSDP=1.33D-03 MaxDP=3.98D-02 DE=-1.18D-01 OVMax= 2.46D-01

 Cycle   3  Pass 1  IDiag  1:
 RMSU=  1.15D-03    CP:  1.01D+00  1.32D+00
 E= -3262.49595575591     Delta-E=       -0.189330701578 Rises=F Damp=F
 DIIS: error= 1.24D-02 at cycle   3 NSaved=   3.
 NSaved= 3 IEnMin= 3 EnMin= -3262.49595575591     IErMin= 3 ErrMin= 1.24D-02
 ErrMax= 1.24D-02  0.00D+00 EMaxC= 1.00D-01 BMatC= 5.13D-02 BMatP= 6.53D-01
 IDIUse=3 WtCom= 8.76D-01 WtEn= 1.24D-01
 Coeff-Com: -0.203D+00 0.448D+00 0.755D+00
 Coeff-En:   0.000D+00 0.000D+00 0.100D+01
 Coeff:     -0.178D+00 0.393D+00 0.786D+00
 Gap=     0.138 Goal=   None    Shift=    0.000
 RMSDP=1.21D-03 MaxDP=4.22D-02 DE=-1.89D-01 OVMax= 7.91D-02

 Cycle   4  Pass 1  IDiag  1:
 RMSU=  7.66D-04    CP:  1.02D+00  1.66D+00  4.64D-01
 E= -3262.49276427759     Delta-E=        0.003191478319 Rises=F Damp=F
 DIIS: error= 1.62D-02 at cycle   4 NSaved=   4.
 NSaved= 4 IEnMin= 3 EnMin= -3262.49595575591     IErMin= 3 ErrMin= 1.24D-02
 ErrMax= 1.62D-02  0.00D+00 EMaxC= 1.00D-01 BMatC= 4.90D-02 BMatP= 5.13D-02
 IDIUse=3 WtCom= 8.38D-01 WtEn= 1.62D-01
 Coeff-Com:  0.622D-01-0.511D-01 0.507D+00 0.482D+00
 Coeff-En:   0.000D+00 0.000D+00 0.518D+00 0.482D+00
 Coeff:      0.521D-01-0.429D-01 0.509D+00 0.482D+00
 Gap=     0.133 Goal=   None    Shift=    0.000
 RMSDP=8.83D-04 MaxDP=3.89D-02 DE= 3.19D-03 OVMax= 4.94D-02

 Cycle   5  Pass 1  IDiag  1:
 RMSU=  1.75D-04    CP:  1.01D+00  1.32D+00  7.34D-01  4.52D-01
 E= -3262.53039812762     Delta-E=       -0.037633850035 Rises=F Damp=F
 DIIS: error= 1.72D-03 at cycle   5 NSaved=   5.
 NSaved= 5 IEnMin= 5 EnMin= -3262.53039812762     IErMin= 5 ErrMin= 1.72D-03
 ErrMax= 1.72D-03  0.00D+00 EMaxC= 1.00D-01 BMatC= 7.75D-04 BMatP= 4.90D-02
 IDIUse=3 WtCom= 9.83D-01 WtEn= 1.72D-02
 Coeff-Com:  0.335D-01-0.337D-01 0.232D+00 0.247D+00 0.522D+00
 Coeff-En:   0.000D+00 0.000D+00 0.000D+00 0.000D+00 0.100D+01
 Coeff:      0.329D-01-0.332D-01 0.228D+00 0.242D+00 0.530D+00
 Gap=     0.131 Goal=   None    Shift=    0.000
 RMSDP=1.67D-04 MaxDP=7.32D-03 DE=-3.76D-02 OVMax= 9.90D-03

 Cycle   6  Pass 1  IDiag  1:
 RMSU=  6.21D-05    CP:  1.01D+00  1.38D+00  7.30D-01  4.71D-01  4.43D-01
 E= -3262.53100104098     Delta-E=       -0.000602913356 Rises=F Damp=F
 DIIS: error= 7.66D-04 at cycle   6 NSaved=   6.
 NSaved= 6 IEnMin= 6 EnMin= -3262.53100104098     IErMin= 6 ErrMin= 7.66D-04
 ErrMax= 7.66D-04  0.00D+00 EMaxC= 1.00D-01 BMatC= 1.12D-04 BMatP= 7.75D-04
 IDIUse=3 WtCom= 9.92D-01 WtEn= 7.66D-03
 Coeff-Com:  0.150D-01-0.159D-01 0.965D-01 0.109D+00 0.325D+00 0.471D+00
 Coeff-En:   0.000D+00 0.000D+00 0.000D+00 0.000D+00 0.741D-01 0.926D+00
 Coeff:      0.149D-01-0.158D-01 0.958D-01 0.108D+00 0.323D+00 0.475D+00
 Gap=     0.130 Goal=   None    Shift=    0.000
 RMSDP=5.10D-05 MaxDP=1.92D-03 DE=-6.03D-04 OVMax= 3.86D-03

 Cycle   7  Pass 1  IDiag  1:
 RMSU=  2.22D-05    CP:  1.01D+00  1.37D+00  7.34D-01  4.76D-01  5.48D-01
                    CP:  3.82D-01
 E= -3262.53109365612     Delta-E=       -0.000092615141 Rises=F Damp=F
 DIIS: error= 3.01D-04 at cycle   7 NSaved=   7.
 NSaved= 7 IEnMin= 7 EnMin= -3262.53109365612     IErMin= 7 ErrMin= 3.01D-04
 ErrMax= 3.01D-04  0.00D+00 EMaxC= 1.00D-01 BMatC= 1.40D-05 BMatP= 1.12D-04
 IDIUse=3 WtCom= 9.97D-01 WtEn= 3.01D-03
 Coeff-Com:  0.390D-02-0.431D-02 0.245D-01 0.296D-01 0.121D+00 0.298D+00
 Coeff-Com:  0.528D+00
 Coeff-En:   0.000D+00 0.000D+00 0.000D+00 0.000D+00 0.000D+00 0.709D-01
 Coeff-En:   0.929D+00
 Coeff:      0.388D-02-0.430D-02 0.245D-01 0.295D-01 0.120D+00 0.297D+00
 Coeff:      0.529D+00
 Gap=     0.130 Goal=   None    Shift=    0.000
 RMSDP=1.74D-05 MaxDP=7.31D-04 DE=-9.26D-05 OVMax= 9.01D-04

 Cycle   8  Pass 1  IDiag  1:
 RMSU=  6.70D-06    CP:  1.01D+00  1.37D+00  7.33D-01  4.80D-01  5.39D-01
                    CP:  5.24D-01  4.39D-01
 E= -3262.53110386351     Delta-E=       -0.000010207395 Rises=F Damp=F
 DIIS: error= 7.16D-05 at cycle   8 NSaved=   8.
 NSaved= 8 IEnMin= 8 EnMin= -3262.53110386351     IErMin= 8 ErrMin= 7.16D-05
 ErrMax= 7.16D-05  0.00D+00 EMaxC= 1.00D-01 BMatC= 1.31D-06 BMatP= 1.40D-05
 IDIUse=1 WtCom= 1.00D+00 WtEn= 0.00D+00
 Coeff-Com:  0.490D-03-0.556D-03 0.434D-02 0.556D-02 0.352D-01 0.122D+00
 Coeff-Com:  0.300D+00 0.533D+00
 Coeff:      0.490D-03-0.556D-03 0.434D-02 0.556D-02 0.352D-01 0.122D+00
 Coeff:      0.300D+00 0.533D+00
 Gap=     0.130 Goal=   None    Shift=    0.000
 RMSDP=5.52D-06 MaxDP=2.34D-04 DE=-1.02D-05 OVMax= 4.53D-04

 Cycle   9  Pass 1  IDiag  1:
 RMSU=  1.75D-06    CP:  1.01D+00  1.37D+00  7.33D-01  4.79D-01  5.44D-01
                    CP:  5.12D-01  5.85D-01  5.20D-01
 E= -3262.53110485418     Delta-E=       -0.000000990663 Rises=F Damp=F
 DIIS: error= 2.64D-05 at cycle   9 NSaved=   9.
 NSaved= 9 IEnMin= 9 EnMin= -3262.53110485418     IErMin= 9 ErrMin= 2.64D-05
 ErrMax= 2.64D-05  0.00D+00 EMaxC= 1.00D-01 BMatC= 1.95D-07 BMatP= 1.31D-06
 IDIUse=1 WtCom= 1.00D+00 WtEn= 0.00D+00
 Coeff-Com: -0.197D-03 0.223D-03-0.361D-03-0.253D-03 0.835D-02 0.429D-01
 Coeff-Com:  0.126D+00 0.326D+00 0.497D+00
 Coeff:     -0.197D-03 0.223D-03-0.361D-03-0.253D-03 0.835D-02 0.429D-01
 Coeff:      0.126D+00 0.326D+00 0.497D+00
 Gap=     0.130 Goal=   None    Shift=    0.000
 RMSDP=1.54D-06 MaxDP=6.04D-05 DE=-9.91D-07 OVMax= 1.27D-04

 Cycle  10  Pass 1  IDiag  1:
 RMSU=  5.52D-07    CP:  1.01D+00  1.37D+00  7.33D-01  4.79D-01  5.44D-01
                    CP:  5.19D-01  5.55D-01  6.18D-01  5.16D-01
 E= -3262.53110502518     Delta-E=       -0.000000171004 Rises=F Damp=F
 DIIS: error= 5.29D-06 at cycle  10 NSaved=  10.
 NSaved=10 IEnMin=10 EnMin= -3262.53110502518     IErMin=10 ErrMin= 5.29D-06
 ErrMax= 5.29D-06  0.00D+00 EMaxC= 1.00D-01 BMatC= 8.65D-09 BMatP= 1.95D-07
 IDIUse=1 WtCom= 1.00D+00 WtEn= 0.00D+00
 Coeff-Com: -0.115D-03 0.128D-03-0.431D-03-0.427D-03 0.292D-02 0.173D-01
 Coeff-Com:  0.542D-01 0.150D+00 0.269D+00 0.507D+00
 Coeff:     -0.115D-03 0.128D-03-0.431D-03-0.427D-03 0.292D-02 0.173D-01
 Coeff:      0.542D-01 0.150D+00 0.269D+00 0.507D+00
 Gap=     0.130 Goal=   None    Shift=    0.000
 RMSDP=3.03D-07 MaxDP=1.19D-05 DE=-1.71D-07 OVMax= 3.53D-05

 Cycle  11  Pass 1  IDiag  1:
 RMSU=  1.58D-07    CP:  1.01D+00  1.37D+00  7.33D-01  4.79D-01  5.44D-01
                    CP:  5.18D-01  5.60D-01  6.13D-01  5.92D-01  7.19D-01
 E= -3262.53110503254     Delta-E=       -0.000000007356 Rises=F Damp=F
 DIIS: error= 1.53D-06 at cycle  11 NSaved=  11.
 NSaved=11 IEnMin=11 EnMin= -3262.53110503254     IErMin=11 ErrMin= 1.53D-06
 ErrMax= 1.53D-06  0.00D+00 EMaxC= 1.00D-01 BMatC= 8.19D-10 BMatP= 8.65D-09
 IDIUse=1 WtCom= 1.00D+00 WtEn= 0.00D+00
 Coeff-Com: -0.270D-04 0.276D-04-0.167D-03-0.179D-03 0.266D-03 0.239D-02
 Coeff-Com:  0.964D-02 0.310D-01 0.684D-01 0.262D+00 0.627D+00
 Coeff:     -0.270D-04 0.276D-04-0.167D-03-0.179D-03 0.266D-03 0.239D-02
 Coeff:      0.964D-02 0.310D-01 0.684D-01 0.262D+00 0.627D+00
 Gap=     0.130 Goal=   None    Shift=    0.000
 RMSDP=1.38D-07 MaxDP=5.27D-06 DE=-7.36D-09 OVMax= 1.38D-05

 Cycle  12  Pass 1  IDiag  1:
 RMSU=  7.70D-08    CP:  1.01D+00  1.37D+00  7.33D-01  4.79D-01  5.44D-01
                    CP:  5.18D-01  5.61D-01  6.19D-01  5.85D-01  7.67D-01
                    CP:  6.77D-01
 E= -3262.53110503323     Delta-E=       -0.000000000697 Rises=F Damp=F
 DIIS: error= 7.15D-07 at cycle  12 NSaved=  12.
 NSaved=12 IEnMin=12 EnMin= -3262.53110503323     IErMin=12 ErrMin= 7.15D-07
 ErrMax= 7.15D-07  0.00D+00 EMaxC= 1.00D-01 BMatC= 1.66D-10 BMatP= 8.19D-10
 IDIUse=1 WtCom= 1.00D+00 WtEn= 0.00D+00
 Coeff-Com: -0.564D-05 0.511D-05-0.507D-04-0.606D-04-0.137D-03-0.414D-03
 Coeff-Com:  0.207D-03 0.370D-02 0.136D-01 0.105D+00 0.369D+00 0.509D+00
 Coeff:     -0.564D-05 0.511D-05-0.507D-04-0.606D-04-0.137D-03-0.414D-03
 Coeff:      0.207D-03 0.370D-02 0.136D-01 0.105D+00 0.369D+00 0.509D+00
 Gap=     0.130 Goal=   None    Shift=    0.000
 RMSDP=4.41D-08 MaxDP=2.05D-06 DE=-6.97D-10 OVMax= 7.32D-06

 Cycle  13  Pass 1  IDiag  1:
 RMSU=  2.11D-08    CP:  1.01D+00  1.37D+00  7.33D-01  4.79D-01  5.44D-01
                    CP:  5.18D-01  5.61D-01  6.18D-01  5.89D-01  7.76D-01
                    CP:  8.26D-01  6.44D-01
 E= -3262.53110503339     Delta-E=       -0.000000000156 Rises=F Damp=F
 DIIS: error= 1.74D-07 at cycle  13 NSaved=  13.
 NSaved=13 IEnMin=13 EnMin= -3262.53110503339     IErMin=13 ErrMin= 1.74D-07
 ErrMax= 1.74D-07  0.00D+00 EMaxC= 1.00D-01 BMatC= 1.31D-11 BMatP= 1.66D-10
 IDIUse=1 WtCom= 1.00D+00 WtEn= 0.00D+00
 Coeff-Com: -0.537D-06 0.636D-06-0.586D-05-0.114D-04-0.996D-04-0.562D-03
 Coeff-Com: -0.126D-02-0.238D-02-0.262D-02 0.221D-01 0.897D-01 0.247D+00
 Coeff-Com:  0.648D+00
 Coeff:     -0.537D-06 0.636D-06-0.586D-05-0.114D-04-0.996D-04-0.562D-03
 Coeff:     -0.126D-02-0.238D-02-0.262D-02 0.221D-01 0.897D-01 0.247D+00
 Coeff:      0.648D+00
 Gap=     0.130 Goal=   None    Shift=    0.000
 RMSDP=1.30D-08 MaxDP=5.47D-07 DE=-1.56D-10 OVMax= 1.23D-06

 Cycle  14  Pass 1  IDiag  1:
 RMSU=  6.61D-09    CP:  1.01D+00  1.37D+00  7.33D-01  4.79D-01  5.44D-01
                    CP:  5.18D-01  5.61D-01  6.19D-01  5.90D-01  7.85D-01
                    CP:  8.25D-01  7.10D-01  8.02D-01
 E= -3262.53110503339     Delta-E=       -0.000000000002 Rises=F Damp=F
 DIIS: error= 7.21D-08 at cycle  14 NSaved=  14.
 NSaved=14 IEnMin=14 EnMin= -3262.53110503339     IErMin=14 ErrMin= 7.21D-08
 ErrMax= 7.21D-08  0.00D+00 EMaxC= 1.00D-01 BMatC= 1.75D-12 BMatP= 1.31D-11
 IDIUse=1 WtCom= 1.00D+00 WtEn= 0.00D+00
 Coeff-Com:  0.354D-06-0.278D-06 0.115D-05-0.108D-05-0.462D-04-0.310D-03
 Coeff-Com: -0.799D-03-0.185D-02-0.319D-02 0.319D-02 0.158D-01 0.993D-01
 Coeff-Com:  0.353D+00 0.535D+00
 Coeff:      0.354D-06-0.278D-06 0.115D-05-0.108D-05-0.462D-04-0.310D-03
 Coeff:     -0.799D-03-0.185D-02-0.319D-02 0.319D-02 0.158D-01 0.993D-01
 Coeff:      0.353D+00 0.535D+00
 Gap=     0.130 Goal=   None    Shift=    0.000
 RMSDP=3.98D-09 MaxDP=1.44D-07 DE=-1.82D-12 OVMax= 6.92D-07

 Error on total polarization charges =  0.01379
 SCF Done:  E(RB3LYP) =  -3262.53110503     A.U. after   14 cycles
            NFock= 14  Conv=0.40D-08     -V/T= 2.0018
 KE= 3.256553394379D+03 PE=-1.050235121687D+04 EE= 2.610125211565D+03
 Leave Link  502 at Sun Jan 12 14:58:27 2020, MaxMem=   134217728 cpu:       995.0
 (Enter E:\Gaussian\G09W\l801.exe)
 DoSCS=F DFT=T ScalE2(SS,OS)=  1.000000  1.000000
 ExpMin= 1.03D-01 ExpMax= 4.40D+05 ExpMxC= 1.51D+04 IAcc=3 IRadAn=         5 AccDes= 0.00D+00
 HarFok:  IExCor=  205 AccDes= 0.00D+00 IRadAn=         5 IDoV=-2 UseB2=F ITyADJ=14
 ICtDFT= 12500011 ScaDFX=  1.000000  1.000000  1.000000  1.000000
 Largest valence mixing into a core orbital is  2.37D-04
 Largest core mixing into a valence orbital is  1.99D-05
 Range of M.O.s used for correlation:    31   353
 NBasis=   353 NAE=    71 NBE=    71 NFC=    30 NFV=     0
 NROrb=    323 NOA=    41 NOB=    41 NVA=   282 NVB=   282

 **** Warning!!: The largest alpha MO coefficient is  0.20160809D+02

 Leave Link  801 at Sun Jan 12 14:58:30 2020, MaxMem=   134217728 cpu:         2.0
 (Enter E:\Gaussian\G09W\l914.exe)
 RHF ground state
 MDV=   134217728 DFT=T DoStab=F Mixed=T DoRPA=T DoScal=F NonHer=T
 NEqPCM:  Using equilibrium solvation (IEInf=0, Eps=  35.6880, EpsInf=   1.8069)
 Making orbital integer symmetry assigments:
 Orbital symmetries:
       Occupied  (A) (A) (A) (A) (A) (A) (A) (A) (A) (A) (A) (A)
                 (A) (A) (A) (A) (A) (A) (A) (A) (A) (A) (A) (A)
                 (A) (A) (A) (A) (A) (A) (A) (A) (A) (A) (A) (A)
                 (A) (A) (A) (A) (A) (A) (A) (A) (A) (A) (A) (A)
                 (A) (A) (A) (A) (A) (A) (A) (A) (A) (A) (A) (A)
                 (A) (A) (A) (A) (A) (A) (A) (A) (A) (A) (A)
       Virtual   (A) (A) (A) (A) (A) (A) (A) (A) (A) (A) (A) (A)
                 (A) (A) (A) (A) (A) (A) (A) (A) (A) (A) (A) (A)
                 (A) (A) (A) (A) (A) (A) (A) (A) (A) (A) (A) (A)
                 (A) (A) (A) (A) (A) (A) (A) (A) (A) (A) (A) (A)
                 (A) (A) (A) (A) (A) (A) (A) (A) (A) (A) (A) (A)
                 (A) (A) (A) (A) (A) (A) (A) (A) (A) (A) (A) (A)
                 (A) (A) (A) (A) (A) (A) (A) (A) (A) (A) (A) (A)
                 (A) (A) (A) (A) (A) (A) (A) (A) (A) (A) (A) (A)
                 (A) (A) (A) (A) (A) (A) (A) (A) (A) (A) (A) (A)
                 (A) (A) (A) (A) (A) (A) (A) (A) (A) (A) (A) (A)
                 (A) (A) (A) (A) (A) (A) (A) (A) (A) (A) (A) (A)
                 (A) (A) (A) (A) (A) (A) (A) (A) (A) (A) (A) (A)
                 (A) (A) (A) (A) (A) (A) (A) (A) (A) (A) (A) (A)
                 (A) (A) (A) (A) (A) (A) (A) (A) (A) (A) (A) (A)
                 (A) (A) (A) (A) (A) (A) (A) (A) (A) (A) (A) (A)
                 (A) (A) (A) (A) (A) (A) (A) (A) (A) (A) (A) (A)
                 (A) (A) (A) (A) (A) (A) (A) (A) (A) (A) (A) (A)
                 (A) (A) (A) (A) (A) (A) (A) (A) (A) (A) (A) (A)
                 (A) (A) (A) (A) (A) (A) (A) (A) (A) (A) (A) (A)
                 (A) (A) (A) (A) (A) (A) (A) (A) (A) (A) (A) (A)
                 (A) (A) (A) (A) (A) (A) (A) (A) (A) (A) (A) (A)
                 (A) (A) (A) (A) (A) (A) (A) (A) (A) (A) (A) (A)
                 (A) (A) (A) (A) (A) (A) (A) (A) (A) (A) (A) (A)
                 (A) (A) (A) (A) (A) (A)
    20 initial guesses have been made.
 Convergence on wavefunction:    0.000001000000000
 Davidson Disk Diagonalization:  ConvIn= 1.00D-06 SkipCon=T Conv= 1.00D-06.
 Max sub-space:   240 roots to seek:    20 dimension of matrix:        23124
 Iteration     1 Dimension    20 NMult     0 NNew     20
 CISAX will form    20 AO SS matrices at one time.
 NMat=    20 NSing=     0 JSym2X= 0.
 FoFJK:  IHMeth= 1 ICntrl=       0 DoSepK=F KAlg= 0 I1Cent=   0 FoldK=F
 IRaf=         0 NMat=  40 IRICut=       1 DoRegI=T DoRafI=F ISym2E= 0.
 FoFCou: FMM=F IPFlag=           0 FMFlag=      100000 FMFlg1=           0
         NFxFlg=           0 DoJE=F BraDBF=F KetDBF=F FulRan=T
         wScrn=  0.000000 ICntrl=       0 IOpCl=  0 I1Cent=           0 NGrid=           0
         NMat0=   40 NMatS0=      0 NMatT0=   20 NMatD0=   40 NMtDS0=    0 NMtDT0=    0
 Symmetry not used in FoFCou.
 New state      3 was old state      5
 New state      4 was old state      3
 New state      5 was old state      4
 Excitation Energies [eV] at current iteration:
 Root      1 :     2.352558906110509
 Root      2 :     2.511162678748315
 Root      3 :     2.723440516656076
 Root      4 :     2.898251108083759
 Root      5 :     2.950600124944657
 Root      6 :     3.272592869454802
 Root      7 :     3.906895984696213
 Root      8 :     4.236949106874992
 Root      9 :     4.369946290782368
 Root     10 :     4.451965758566275
 Root     11 :     4.566061085071334
 Root     12 :     4.577541931267202
 Root     13 :     4.734864832764982
 Root     14 :     4.770331193583984
 Root     15 :     4.786323394982388
 Root     16 :     5.250217961086448
 Root     17 :     5.366602027556524
 Root     18 :     5.400128647721440
 Root     19 :     5.486753201958645
 Root     20 :     5.644849600118420
 Iteration     2 Dimension    30 NMult    20 NNew     10
 CISAX will form    10 AO SS matrices at one time.
 NMat=    10 NSing=     0 JSym2X= 0.
 Root      1 not converged, maximum delta is    0.053928297888401
 Root      2 not converged, maximum delta is    0.068899580295798
 Root      3 not converged, maximum delta is    0.111433309846792
 Root      4 not converged, maximum delta is    0.367662525970483
 Root      5 not converged, maximum delta is    0.408096225560517
 Excitation Energies [eV] at current iteration:
 Root      1 :     2.166218876008775   Change is   -0.186340030101735
 Root      2 :     2.348488406505765   Change is   -0.162674272242550
 Root      3 :     2.548368325232180   Change is   -0.175072191423896
 Root      4 :     2.627414790247154   Change is   -0.270836317836606
 Root      5 :     2.801168444118582   Change is   -0.149431680826075
 Iteration     3 Dimension    40 NMult    30 NNew     10
 CISAX will form    10 AO SS matrices at one time.
 NMat=    10 NSing=     0 JSym2X= 0.
 Root      1 not converged, maximum delta is    0.011106995427177
 Root      2 not converged, maximum delta is    0.013060044114738
 Root      3 not converged, maximum delta is    0.066450605629184
 Root      4 not converged, maximum delta is    0.073632655833200
 Root      5 not converged, maximum delta is    0.039864355524812
 Excitation Energies [eV] at current iteration:
 Root      1 :     2.150540352336853   Change is   -0.015678523671922
 Root      2 :     2.345550982744824   Change is   -0.002937423760942
 Root      3 :     2.541744944080941   Change is   -0.006623381151239
 Root      4 :     2.603298107116277   Change is   -0.024116683130877
 Root      5 :     2.780197541281630   Change is   -0.020970902836951
 Iteration     4 Dimension    50 NMult    40 NNew     10
 CISAX will form    10 AO SS matrices at one time.
 NMat=    10 NSing=     0 JSym2X= 0.
 Root      1 not converged, maximum delta is    0.001872542834492
 Root      2 not converged, maximum delta is    0.000723985487344
 Root      3 not converged, maximum delta is    0.005202889354936
 Root      4 not converged, maximum delta is    0.006222446737435
 Root      5 not converged, maximum delta is    0.005126306691374
 Excitation Energies [eV] at current iteration:
 Root      1 :     2.150032864242703   Change is   -0.000507488094150
 Root      2 :     2.345474418893416   Change is   -0.000076563851408
 Root      3 :     2.541338622676678   Change is   -0.000406321404263
 Root      4 :     2.602071662297012   Change is   -0.001226444819265
 Root      5 :     2.778792028944138   Change is   -0.001405512337493
 Iteration     5 Dimension    60 NMult    50 NNew     10
 CISAX will form    10 AO SS matrices at one time.
 NMat=    10 NSing=     0 JSym2X= 0.
 Root      1 not converged, maximum delta is    0.000242539090149
 Root      2 not converged, maximum delta is    0.000099574121951
 Root      3 not converged, maximum delta is    0.000301941783692
 Root      4 not converged, maximum delta is    0.000457748470498
 Root      5 not converged, maximum delta is    0.000811497717016
 Excitation Energies [eV] at current iteration:
 Root      1 :     2.150020311517479   Change is   -0.000012552725224
 Root      2 :     2.345472276142531   Change is   -0.000002142750885
 Root      3 :     2.541322963254997   Change is   -0.000015659421681
 Root      4 :     2.602024526434906   Change is   -0.000047135862106
 Root      5 :     2.778729677542587   Change is   -0.000062351401551
 Iteration     6 Dimension    70 NMult    60 NNew     10
 CISAX will form    10 AO SS matrices at one time.
 NMat=    10 NSing=     0 JSym2X= 0.
 Root      1 not converged, maximum delta is    0.000035286809639
 Root      2 not converged, maximum delta is    0.000013934957840
 Root      3 not converged, maximum delta is    0.000104231196742
 Root      4 not converged, maximum delta is    0.000164177946726
 Root      5 not converged, maximum delta is    0.000191078011014
 Excitation Energies [eV] at current iteration:
 Root      1 :     2.150019996332562   Change is   -0.000000315184917
 Root      2 :     2.345472213622271   Change is   -0.000000062520260
 Root      3 :     2.541322262678186   Change is   -0.000000700576811
 Root      4 :     2.602022462144174   Change is   -0.000002064290733
 Root      5 :     2.778725966507333   Change is   -0.000003711035254
 Iteration     7 Dimension    80 NMult    70 NNew     10
 CISAX will form    10 AO SS matrices at one time.
 NMat=    10 NSing=     0 JSym2X= 0.
 Root      1 not converged, maximum delta is    0.000005492721666
 Root      2 not converged, maximum delta is    0.000002405776785
 Root      3 not converged, maximum delta is    0.000012495473434
 Root      4 not converged, maximum delta is    0.000022017222001
 Root      5 not converged, maximum delta is    0.000035819160580
 Excitation Energies [eV] at current iteration:
 Root      1 :     2.150019987746355   Change is   -0.000000008586207
 Root      2 :     2.345472211839621   Change is   -0.000000001782650
 Root      3 :     2.541322234027245   Change is   -0.000000028650941
 Root      4 :     2.602022380918010   Change is   -0.000000081226164
 Root      5 :     2.778725824881745   Change is   -0.000000141625588
 Iteration     8 Dimension    90 NMult    80 NNew     10
 CISAX will form    10 AO SS matrices at one time.
 NMat=    10 NSing=     0 JSym2X= 0.
 Root      1 has converged.
 Root      2 has converged.
 Root      3 not converged, maximum delta is    0.000001988752856
 Root      4 not converged, maximum delta is    0.000003620219863
 Root      5 not converged, maximum delta is    0.000005177245925
 Excitation Energies [eV] at current iteration:
 Root      1 :     2.150019987514379   Change is   -0.000000000231976
 Root      2 :     2.345472211789816   Change is   -0.000000000049805
 Root      3 :     2.541322233012413   Change is   -0.000000001014832
 Root      4 :     2.602022378032779   Change is   -0.000000002885231
 Root      5 :     2.778725818074948   Change is   -0.000000006806797
 Iteration     9 Dimension    96 NMult    90 NNew      6
 CISAX will form     6 AO SS matrices at one time.
 NMat=     6 NSing=     0 JSym2X= 0.
 Root      1 has converged.
 Root      2 has converged.
 Root      3 has converged.
 Root      4 has converged.
 Root      5 has converged.
 Excitation Energies [eV] at current iteration:
 Root      1 :     2.150019987513079   Change is   -0.000000000001300
 Root      2 :     2.345472211788870   Change is   -0.000000000000946
 Root      3 :     2.541322232978383   Change is   -0.000000000034030
 Root      4 :     2.602022377931964   Change is   -0.000000000100815
 Root      5 :     2.778725817876524   Change is   -0.000000000198424
 Convergence achieved on expansion vectors.
 ***********************************************************************
 Excited states from <AA,BB:AA,BB> singles matrix:
 ***********************************************************************
 
 1PDM for each excited state written to RWF  633
 Ground to excited state transition densities written to RWF  633
 Ground to excited state transition electric dipole moments (Au):
       state          X           Y           Z        Dip. S.      Osc.
         1         0.0000      0.0000      0.0000      0.0000      0.0000
         2         0.0000      0.0000      0.0000      0.0000      0.0000
         3         0.0000      0.0000      0.0000      0.0000      0.0000
         4         0.0000      0.0000      0.0000      0.0000      0.0000
         5         0.0000      0.0000      0.0000      0.0000      0.0000
 Ground to excited state transition velocity dipole moments (Au):
       state          X           Y           Z        Dip. S.      Osc.
         1         0.0000      0.0000      0.0000      0.0000      0.0000
         2         0.0000      0.0000      0.0000      0.0000      0.0000
         3         0.0000      0.0000      0.0000      0.0000      0.0000
         4         0.0000      0.0000      0.0000      0.0000      0.0000
         5         0.0000      0.0000      0.0000      0.0000      0.0000
 Ground to excited state transition magnetic dipole moments (Au):
       state          X           Y           Z
         1         0.0000      0.0000      0.0000
         2         0.0000      0.0000      0.0000
         3         0.0000      0.0000      0.0000
         4         0.0000      0.0000      0.0000
         5         0.0000      0.0000      0.0000
 Ground to excited state transition velocity quadrupole moments (Au):
       state          XX          YY          ZZ          XY          XZ          YZ
         1         0.0000      0.0000      0.0000      0.0000      0.0000      0.0000
         2         0.0000      0.0000      0.0000      0.0000      0.0000      0.0000
         3         0.0000      0.0000      0.0000      0.0000      0.0000      0.0000
         4         0.0000      0.0000      0.0000      0.0000      0.0000      0.0000
         5         0.0000      0.0000      0.0000      0.0000      0.0000      0.0000
 <0|del|b> * <b|rxdel|0> + <0|del|b> * <b|delr+rdel|0>
 Rotatory Strengths (R) in cgs (10**-40 erg-esu-cm/Gauss)
       state          XX          YY          ZZ    R(velocity)    E-M Angle
         1         0.0000      0.0000      0.0000      0.0000       90.00
         2         0.0000      0.0000      0.0000      0.0000       90.00
         3         0.0000      0.0000      0.0000      0.0000       90.00
         4         0.0000      0.0000      0.0000      0.0000       90.00
         5         0.0000      0.0000      0.0000      0.0000       90.00
 1/2[<0|r|b>*<b|rxdel|0> + (<0|rxdel|b>*<b|r|0>)*]
 Rotatory Strengths (R) in cgs (10**-40 erg-esu-cm/Gauss)
       state          XX          YY          ZZ     R(length)
         1         0.0000      0.0000      0.0000      0.0000
         2         0.0000      0.0000      0.0000      0.0000
         3         0.0000      0.0000      0.0000      0.0000
         4         0.0000      0.0000      0.0000      0.0000
         5         0.0000      0.0000      0.0000      0.0000
  1/2[<0|del|b>*<b|r|0> + (<0|r|b>*<b|del|0>)*] (Au)
       state          X           Y           Z        Dip. S.   Osc.(frdel)
         1         0.0000      0.0000      0.0000      0.0000      0.0000
         2         0.0000      0.0000      0.0000      0.0000      0.0000
         3         0.0000      0.0000      0.0000      0.0000      0.0000
         4         0.0000      0.0000      0.0000      0.0000      0.0000
         5         0.0000      0.0000      0.0000      0.0000      0.0000

 Excitation energies and oscillator strengths:
 
 Excited State   1:      Triplet-A      2.1500 eV  576.67 nm  f=0.0000  <S**2>=2.000
      64 -> 72        -0.15114
      66 -> 72        -0.11939
      71 -> 72         0.63700
      71 -> 74        -0.12618
 This state for optimization and/or second-order correction.
 Total Energy, E(TD-HF/TD-KS) =  -3262.45209325    
 Copying the excited state density for this state as the 1-particle RhoCI density.
 
 Excited State   2:      Triplet-A      2.3455 eV  528.61 nm  f=0.0000  <S**2>=2.000
      67 -> 73         0.10810
      68 -> 72        -0.11057
      69 -> 72        -0.29925
      70 -> 72         0.60273
 
 Excited State   3:      Triplet-A      2.5413 eV  487.87 nm  f=0.0000  <S**2>=2.000
      66 -> 72        -0.13803
      67 -> 72        -0.44764
      68 -> 72         0.46476
      70 -> 73        -0.14942
 
 Excited State   4:      Triplet-A      2.6020 eV  476.49 nm  f=0.0000  <S**2>=2.000
      66 -> 72        -0.16226
      67 -> 72         0.47839
      68 -> 72         0.34939
      68 -> 74         0.11115
      69 -> 72        -0.15664
      69 -> 73        -0.13410
      71 -> 72        -0.19178
 
 Excited State   5:      Triplet-A      2.7787 eV  446.19 nm  f=0.0000  <S**2>=2.000
      66 -> 72        -0.22296
      69 -> 72         0.56857
      70 -> 72         0.29574
 SavETr:  write IOETrn=   770 NScale= 10 NData=  16 NLR=1 NState=    5 LETran=      96.
 The selected state is a triplet
 CISAX will form     1 AO SS matrices at one time.
 NMat=     1 NSing=     0 JSym2X= 0.
 CISAX will form     1 AO SS matrices at one time.
 NMat=     1 NSing=     0 JSym2X= 0.
 Leave Link  914 at Sun Jan 12 15:59:19 2020, MaxMem=   134217728 cpu:      3648.0
 (Enter E:\Gaussian\G09W\l1002.exe)
 Minotr:  Closed shell wavefunction.
          Computing CIS/TD-HF/TD-KS derivatives.
          Using Z-Vector for PSCF gradient.
          Skipping F1 and S1 gradient terms here.
          IDoAtm=111111111111111111111111
 NEqPCM:  Using equilibrium solvation (IEInf=0, Eps=  35.6880, EpsInf=   1.8069)
          Frozen-core window.
          Direct CPHF calculation.
          Differentiating once with respect to electric field.
                with respect to dipole field.
          Differentiating once with respect to nuclear coordinates.
          Requested convergence is 1.0D-10 RMS, and 1.0D-09 maximum.
          NewPWx=F KeepS1=T KeepF1=T KeepIn=T MapXYZ=F SortEE=F KeepMc=T.
          MDV=     134217394 using IRadAn=       0.
 Using stored XC quadrature information.
          Solving linear equations separately, MaxMat=       0.
          There are     1 degrees of freedom in the 1st order CPHF.  IDoFFX=0 NUNeed=     1.
 FoFJK:  IHMeth= 1 ICntrl=       0 DoSepK=F KAlg= 0 I1Cent=   0 FoldK=F
 IRaf= 800000000 NMat=   1 IRICut=       1 DoRegI=T DoRafI=F ISym2E=-1.
 FoFCou: FMM=F IPFlag=           0 FMFlag=      100000 FMFlg1=           0
         NFxFlg=           0 DoJE=F BraDBF=F KetDBF=F FulRan=T
         wScrn=  0.000000 ICntrl=       0 IOpCl=  0 I1Cent=           0 NGrid=           0
         NMat0=    1 NMatS0=      1 NMatT0=    0 NMatD0=    1 NMtDS0=    0 NMtDT0=    0
 Petite list used in FoFCou.
 LinEq1:  Iter=  0 NonCon=     1 RMS=3.57D-03 Max=1.88D-01 NDo=     1
 AX will form     1 AO Fock derivatives at one time.
 LinEq1:  Iter=  1 NonCon=     1 RMS=2.44D-03 Max=1.19D-01 NDo=     1
 LinEq1:  Iter=  2 NonCon=     1 RMS=1.95D-03 Max=9.49D-02 NDo=     1
 LinEq1:  Iter=  3 NonCon=     1 RMS=1.10D-03 Max=5.19D-02 NDo=     1
 LinEq1:  Iter=  4 NonCon=     1 RMS=7.18D-04 Max=3.66D-02 NDo=     1
 LinEq1:  Iter=  5 NonCon=     1 RMS=5.14D-04 Max=2.33D-02 NDo=     1
 LinEq1:  Iter=  6 NonCon=     1 RMS=3.12D-04 Max=1.34D-02 NDo=     1
 LinEq1:  Iter=  7 NonCon=     1 RMS=2.15D-04 Max=6.97D-03 NDo=     1
 LinEq1:  Iter=  8 NonCon=     1 RMS=1.31D-04 Max=5.21D-03 NDo=     1
 LinEq1:  Iter=  9 NonCon=     1 RMS=1.06D-04 Max=5.06D-03 NDo=     1
 LinEq1:  Iter= 10 NonCon=     1 RMS=7.36D-05 Max=2.39D-03 NDo=     1
 LinEq1:  Iter= 11 NonCon=     1 RMS=4.66D-05 Max=1.32D-03 NDo=     1
 LinEq1:  Iter= 12 NonCon=     1 RMS=2.19D-05 Max=7.11D-04 NDo=     1
 LinEq1:  Iter= 13 NonCon=     1 RMS=1.13D-05 Max=3.18D-04 NDo=     1
 LinEq1:  Iter= 14 NonCon=     1 RMS=4.81D-06 Max=1.11D-04 NDo=     1
 LinEq1:  Iter= 15 NonCon=     1 RMS=2.67D-06 Max=8.60D-05 NDo=     1
 LinEq1:  Iter= 16 NonCon=     1 RMS=9.07D-07 Max=2.62D-05 NDo=     1
 LinEq1:  Iter= 17 NonCon=     1 RMS=6.45D-07 Max=2.03D-05 NDo=     1
 LinEq1:  Iter= 18 NonCon=     1 RMS=3.47D-07 Max=1.34D-05 NDo=     1
 LinEq1:  Iter= 19 NonCon=     1 RMS=1.93D-07 Max=8.21D-06 NDo=     1
 LinEq1:  Iter= 20 NonCon=     1 RMS=7.89D-08 Max=3.52D-06 NDo=     1
 LinEq1:  Iter= 21 NonCon=     1 RMS=4.24D-08 Max=1.20D-06 NDo=     1
 LinEq1:  Iter= 22 NonCon=     1 RMS=1.82D-08 Max=6.22D-07 NDo=     1
 LinEq1:  Iter= 23 NonCon=     1 RMS=1.03D-08 Max=3.49D-07 NDo=     1
 LinEq1:  Iter= 24 NonCon=     1 RMS=5.17D-09 Max=2.02D-07 NDo=     1
 LinEq1:  Iter= 25 NonCon=     1 RMS=3.11D-09 Max=1.23D-07 NDo=     1
 LinEq1:  Iter= 26 NonCon=     1 RMS=1.40D-09 Max=3.85D-08 NDo=     1
 LinEq1:  Iter= 27 NonCon=     1 RMS=4.48D-10 Max=1.44D-08 NDo=     1
 LinEq1:  Iter= 28 NonCon=     1 RMS=2.38D-10 Max=6.56D-09 NDo=     1
 LinEq1:  Iter= 29 NonCon=     1 RMS=1.16D-10 Max=3.78D-09 NDo=     1
 LinEq1:  Iter= 30 NonCon=     0 RMS=2.44D-11 Max=7.89D-10 NDo=     1
 Linear equations converged to 1.000D-10 1.000D-09 after    30 iterations.
 End of Minotr F.D. properties file   721 does not exist.
 End of Minotr F.D. properties file   722 does not exist.
 End of Minotr F.D. properties file   788 does not exist.
 Leave Link 1002 at Sun Jan 12 16:41:26 2020, MaxMem=   134217728 cpu:      2526.0
 (Enter E:\Gaussian\G09W\l601.exe)
 Copying SCF densities to generalized density rwf, IOpCl= 0 IROHF=0.

 **********************************************************************

            Population analysis using the SCF density.

 **********************************************************************

 Orbital symmetries:
       Occupied  (A) (A) (A) (A) (A) (A) (A) (A) (A) (A) (A) (A)
                 (A) (A) (A) (A) (A) (A) (A) (A) (A) (A) (A) (A)
                 (A) (A) (A) (A) (A) (A) (A) (A) (A) (A) (A) (A)
                 (A) (A) (A) (A) (A) (A) (A) (A) (A) (A) (A) (A)
                 (A) (A) (A) (A) (A) (A) (A) (A) (A) (A) (A) (A)
                 (A) (A) (A) (A) (A) (A) (A) (A) (A) (A) (A)
       Virtual   (A) (A) (A) (A) (A) (A) (A) (A) (A) (A) (A) (A)
                 (A) (A) (A) (A) (A) (A) (A) (A) (A) (A) (A) (A)
                 (A) (A) (A) (A) (A) (A) (A) (A) (A) (A) (A) (A)
                 (A) (A) (A) (A) (A) (A) (A) (A) (A) (A) (A) (A)
                 (A) (A) (A) (A) (A) (A) (A) (A) (A) (A) (A) (A)
                 (A) (A) (A) (A) (A) (A) (A) (A) (A) (A) (A) (A)
                 (A) (A) (A) (A) (A) (A) (A) (A) (A) (A) (A) (A)
                 (A) (A) (A) (A) (A) (A) (A) (A) (A) (A) (A) (A)
                 (A) (A) (A) (A) (A) (A) (A) (A) (A) (A) (A) (A)
                 (A) (A) (A) (A) (A) (A) (A) (A) (A) (A) (A) (A)
                 (A) (A) (A) (A) (A) (A) (A) (A) (A) (A) (A) (A)
                 (A) (A) (A) (A) (A) (A) (A) (A) (A) (A) (A) (A)
                 (A) (A) (A) (A) (A) (A) (A) (A) (A) (A) (A) (A)
                 (A) (A) (A) (A) (A) (A) (A) (A) (A) (A) (A) (A)
                 (A) (A) (A) (A) (A) (A) (A) (A) (A) (A) (A) (A)
                 (A) (A) (A) (A) (A) (A) (A) (A) (A) (A) (A) (A)
                 (A) (A) (A) (A) (A) (A) (A) (A) (A) (A) (A) (A)
                 (A) (A) (A) (A) (A) (A) (A) (A) (A) (A) (A) (A)
                 (A) (A) (A) (A) (A) (A) (A) (A) (A) (A) (A) (A)
                 (A) (A) (A) (A) (A) (A) (A) (A) (A) (A) (A) (A)
                 (A) (A) (A) (A) (A) (A) (A) (A) (A) (A) (A) (A)
                 (A) (A) (A) (A) (A) (A) (A) (A) (A) (A) (A) (A)
                 (A) (A) (A) (A) (A) (A) (A) (A) (A) (A) (A) (A)
                 (A) (A) (A) (A) (A) (A)
 The electronic state is 1-A.
 Alpha  occ. eigenvalues -- -482.84754 -62.50062 -56.32090 -56.31719 -56.31689
 Alpha  occ. eigenvalues --  -19.12988 -19.12282 -10.28452 -10.27959 -10.26210
 Alpha  occ. eigenvalues --  -10.22110 -10.21902 -10.21223 -10.21215 -10.21177
 Alpha  occ. eigenvalues --  -10.21138 -10.20895 -10.20022 -10.19999 -10.19947
 Alpha  occ. eigenvalues --  -10.19921  -8.71054  -6.54193  -6.52936  -6.52855
 Alpha  occ. eigenvalues --   -2.65297  -2.64942  -2.64882  -2.63882  -2.63881
 Alpha  occ. eigenvalues --   -1.05380  -1.03853  -0.90254  -0.88850  -0.84211
 Alpha  occ. eigenvalues --   -0.80789  -0.79018  -0.78157  -0.75423  -0.70391
 Alpha  occ. eigenvalues --   -0.66806  -0.64734  -0.62069  -0.59095  -0.56724
 Alpha  occ. eigenvalues --   -0.55510  -0.50916  -0.49785  -0.49256  -0.48024
 Alpha  occ. eigenvalues --   -0.46466  -0.45669  -0.45457  -0.45188  -0.44680
 Alpha  occ. eigenvalues --   -0.43505  -0.41225  -0.40647  -0.40397  -0.38181
 Alpha  occ. eigenvalues --   -0.38074  -0.37438  -0.36782  -0.32965  -0.30953
 Alpha  occ. eigenvalues --   -0.29475  -0.28740  -0.28353  -0.28057  -0.27749
 Alpha  occ. eigenvalues --   -0.26100
 Alpha virt. eigenvalues --   -0.13113  -0.07639  -0.04630  -0.02700  -0.01170
 Alpha virt. eigenvalues --    0.03255   0.03601   0.05287   0.07069   0.08411
 Alpha virt. eigenvalues --    0.09258   0.10583   0.11809   0.12141   0.12835
 Alpha virt. eigenvalues --    0.17562   0.19071   0.20230   0.20850   0.21371
 Alpha virt. eigenvalues --    0.23400   0.23809   0.25418   0.26217   0.26836
 Alpha virt. eigenvalues --    0.27341   0.27860   0.28007   0.28945   0.30147
 Alpha virt. eigenvalues --    0.31905   0.34614   0.35112   0.36264   0.36326
 Alpha virt. eigenvalues --    0.37324   0.37400   0.37702   0.38786   0.39154
 Alpha virt. eigenvalues --    0.39713   0.40376   0.40492   0.40986   0.42051
 Alpha virt. eigenvalues --    0.42693   0.42779   0.44335   0.44472   0.45079
 Alpha virt. eigenvalues --    0.45348   0.45937   0.47703   0.47928   0.51310
 Alpha virt. eigenvalues --    0.52290   0.53192   0.54584   0.55246   0.55749
 Alpha virt. eigenvalues --    0.56059   0.57647   0.58507   0.58738   0.59299
 Alpha virt. eigenvalues --    0.59498   0.60542   0.61027   0.61623   0.62175
 Alpha virt. eigenvalues --    0.63156   0.64630   0.65219   0.65433   0.66358
 Alpha virt. eigenvalues --    0.69704   0.69974   0.71579   0.71787   0.73096
 Alpha virt. eigenvalues --    0.74320   0.75286   0.76975   0.77817   0.79312
 Alpha virt. eigenvalues --    0.80011   0.80670   0.82316   0.82939   0.84518
 Alpha virt. eigenvalues --    0.86157   0.87684   0.88036   0.88968   0.90536
 Alpha virt. eigenvalues --    0.91965   0.93541   0.95984   0.97180   0.97703
 Alpha virt. eigenvalues --    0.98136   0.99037   1.00638   1.03311   1.03840
 Alpha virt. eigenvalues --    1.05135   1.07880   1.09249   1.09627   1.10877
 Alpha virt. eigenvalues --    1.11395   1.12561   1.13002   1.15292   1.16667
 Alpha virt. eigenvalues --    1.17715   1.18985   1.20232   1.22768   1.24306
 Alpha virt. eigenvalues --    1.25264   1.27183   1.27385   1.29526   1.31994
 Alpha virt. eigenvalues --    1.38626   1.41397   1.42612   1.44469   1.44910
 Alpha virt. eigenvalues --    1.46101   1.46882   1.49121   1.51154   1.53624
 Alpha virt. eigenvalues --    1.55759   1.56469   1.57258   1.57827   1.63626
 Alpha virt. eigenvalues --    1.65666   1.67525   1.68708   1.69909   1.72883
 Alpha virt. eigenvalues --    1.76599   1.77167   1.77866   1.80584   1.81305
 Alpha virt. eigenvalues --    1.82644   1.82979   1.83793   1.84582   1.85484
 Alpha virt. eigenvalues --    1.86800   1.87489   1.87949   1.89862   1.90563
 Alpha virt. eigenvalues --    1.90797   1.92201   1.93868   1.94787   1.97231
 Alpha virt. eigenvalues --    2.01144   2.05506   2.08015   2.12838   2.15452
 Alpha virt. eigenvalues --    2.18554   2.19005   2.22813   2.25278   2.26153
 Alpha virt. eigenvalues --    2.28349   2.29399   2.29951   2.31627   2.32883
 Alpha virt. eigenvalues --    2.34429   2.35019   2.37568   2.45274   2.45794
 Alpha virt. eigenvalues --    2.48052   2.50969   2.53969   2.54407   2.56612
 Alpha virt. eigenvalues --    2.58477   2.64168   2.64995   2.69211   2.71918
 Alpha virt. eigenvalues --    2.72533   2.75662   2.78731   2.79238   2.81026
 Alpha virt. eigenvalues --    2.82534   2.83179   2.87213   2.88504   2.91179
 Alpha virt. eigenvalues --    2.92170   2.96372   2.97794   3.02012   3.03558
 Alpha virt. eigenvalues --    3.04959   3.10530   3.11562   3.13435   3.16029
 Alpha virt. eigenvalues --    3.16652   3.21062   3.23172   3.25092   3.26482
 Alpha virt. eigenvalues --    3.26960   3.28394   3.29856   3.30065   3.31092
 Alpha virt. eigenvalues --    3.33939   3.37263   3.39958   3.43741   3.44071
 Alpha virt. eigenvalues --    3.49618   3.50921   3.51705   3.55132   3.65320
 Alpha virt. eigenvalues --    3.67801   3.71368   3.79795   3.90756   3.93620
 Alpha virt. eigenvalues --    4.10499   4.11091   4.12250   4.15591   4.20279
 Alpha virt. eigenvalues --    4.35403   4.36370   4.53079   4.71586   4.73558
 Alpha virt. eigenvalues --    4.76908   4.86574   4.88625   5.04933   5.06816
 Alpha virt. eigenvalues --    5.56572   5.68562   6.48298   7.44723   7.52313
 Alpha virt. eigenvalues --    7.61979  23.17521  23.34885  23.66384  23.73611
 Alpha virt. eigenvalues --   23.77064  23.82184  23.84422  23.86308  23.90152
 Alpha virt. eigenvalues --   23.98184  24.02567  24.03720  24.10476  24.11295
 Alpha virt. eigenvalues --   47.76879  49.94328  49.95660 289.64687 289.72154
 Alpha virt. eigenvalues --  289.839641020.52039
          Condensed to atoms (all electrons):
               1          2          3          4          5          6
     1  C    4.985701   0.485873  -0.031160  -0.048971  -0.030945   0.482485
     2  C    0.485873   5.119518   0.394596  -0.095304  -0.057298  -0.030311
     3  C   -0.031160   0.394596   5.514215   0.441965  -0.090443  -0.048711
     4  C   -0.048971  -0.095304   0.441965   5.510521   0.403871  -0.031006
     5  C   -0.030945  -0.057298  -0.090443   0.403871   5.103853   0.488085
     6  C    0.482485  -0.030311  -0.048711  -0.031006   0.488085   4.982857
     7  H    0.399673  -0.041921   0.007346   0.000070   0.006046  -0.042159
     8  H   -0.038473   0.403112  -0.066803   0.004414  -0.001014   0.006828
     9  H    0.006650  -0.000882   0.004327  -0.062973   0.402118  -0.038361
    10  H   -0.041988   0.006001   0.000033   0.007167  -0.042082   0.399974
    11  C   -0.002025   0.011777   0.039554   0.160266  -0.068820   0.012232
    12  O   -0.000001  -0.000031   0.004214  -0.152009   0.020166   0.001182
    13  C    0.012652  -0.070675   0.146246   0.046527   0.010840  -0.001988
    14  C    0.000494  -0.005456  -0.130097  -0.044195   0.033746  -0.000751
    15  C   -0.000802   0.036045  -0.032117  -0.132512  -0.005008   0.000494
    16  C    0.000006   0.000092  -0.004875   0.035070  -0.001391  -0.000012
    17  C   -0.000011  -0.001184   0.031853  -0.004530   0.000074   0.000004
    18  C    0.000000   0.000007   0.000492  -0.000695  -0.000016   0.000000
    19  H    0.000001  -0.000001  -0.000242   0.004410  -0.000170  -0.000004
    20  C    0.000000  -0.000018  -0.000709   0.000548   0.000005   0.000000
    21  H   -0.000004  -0.000149   0.003927  -0.000235  -0.000001   0.000001
    22  H    0.000000   0.000000  -0.000020   0.000009   0.000000   0.000000
    23  Br   0.000000   0.000000   0.000002  -0.000005   0.000000   0.000000
    24  O    0.001149   0.019620  -0.150101   0.004730  -0.000031   0.000002
               7          8          9         10         11         12
     1  C    0.399673  -0.038473   0.006650  -0.041988  -0.002025  -0.000001
     2  C   -0.041921   0.403112  -0.000882   0.006001   0.011777  -0.000031
     3  C    0.007346  -0.066803   0.004327   0.000033   0.039554   0.004214
     4  C    0.000070   0.004414  -0.062973   0.007167   0.160266  -0.152009
     5  C    0.006046  -0.001014   0.402118  -0.042082  -0.068820   0.020166
     6  C   -0.042159   0.006828  -0.038361   0.399974   0.012232   0.001182
     7  H    0.452602  -0.006313  -0.000248  -0.005445   0.000022   0.000000
     8  H   -0.006313   0.458156   0.000077  -0.000237   0.000112   0.000003
     9  H   -0.000248   0.000077   0.455772  -0.006171  -0.010031   0.021291
    10  H   -0.005445  -0.000237  -0.006171   0.452255  -0.000344  -0.000044
    11  C    0.000022   0.000112  -0.010031  -0.000344   4.783751   0.749883
    12  O    0.000000   0.000003   0.021291  -0.000044   0.749883   7.804676
    13  C   -0.000366  -0.010061   0.000067   0.000022  -0.059255  -0.001298
    14  C    0.000009  -0.000277   0.004267  -0.000021   0.138861  -0.161319
    15  C   -0.000024   0.004743  -0.000232   0.000010   0.040404   0.004442
    16  C    0.000000  -0.000001  -0.000175   0.000000  -0.060042   0.023420
    17  C    0.000000  -0.000153   0.000000   0.000000   0.009094  -0.000039
    18  C    0.000000   0.000001  -0.000005   0.000000   0.012058   0.001688
    19  H    0.000000  -0.000001  -0.000077   0.000000  -0.008643   0.023049
    20  C    0.000000  -0.000006   0.000000   0.000000  -0.001583   0.000018
    21  H    0.000000  -0.000077  -0.000001   0.000000   0.000069   0.000003
    22  H    0.000000   0.000000   0.000000   0.000000   0.000016   0.000000
    23  Br   0.000000   0.000000   0.000000   0.000000  -0.000423  -0.000004
    24  O   -0.000048   0.022800   0.000003   0.000000  -0.001216   0.000000
              13         14         15         16         17         18
     1  C    0.012652   0.000494  -0.000802   0.000006  -0.000011   0.000000
     2  C   -0.070675  -0.005456   0.036045   0.000092  -0.001184   0.000007
     3  C    0.146246  -0.130097  -0.032117  -0.004875   0.031853   0.000492
     4  C    0.046527  -0.044195  -0.132512   0.035070  -0.004530  -0.000695
     5  C    0.010840   0.033746  -0.005008  -0.001391   0.000074  -0.000016
     6  C   -0.001988  -0.000751   0.000494  -0.000012   0.000004   0.000000
     7  H   -0.000366   0.000009  -0.000024   0.000000   0.000000   0.000000
     8  H   -0.010061  -0.000277   0.004743  -0.000001  -0.000153   0.000001
     9  H    0.000067   0.004267  -0.000232  -0.000175   0.000000  -0.000005
    10  H    0.000022  -0.000021   0.000010   0.000000   0.000000   0.000000
    11  C   -0.059255   0.138861   0.040404  -0.060042   0.009094   0.012058
    12  O   -0.001298  -0.161319   0.004442   0.023420  -0.000039   0.001688
    13  C    4.812241   0.051365   0.136052   0.011461  -0.068346  -0.001904
    14  C    0.051365   5.557074   0.424193   0.361751  -0.081989  -0.022234
    15  C    0.136052   0.424193   5.572662  -0.094172   0.400215  -0.050192
    16  C    0.011461   0.361751  -0.094172   5.195663  -0.048077   0.428951
    17  C   -0.068346  -0.081989   0.400215  -0.048077   5.084809  -0.018630
    18  C   -0.001904  -0.022234  -0.050192   0.428951  -0.018630   5.136456
    19  H    0.000119  -0.062083   0.004324   0.399998  -0.001376  -0.044279
    20  C    0.013910  -0.041430  -0.036469  -0.033796   0.475650   0.435215
    21  H   -0.009785   0.004188  -0.057191  -0.000754   0.396623   0.006421
    22  H   -0.000275  -0.000433   0.006997   0.005731  -0.036637  -0.048367
    23  Br   0.000016   0.010089  -0.000037  -0.087817   0.007953   0.290211
    24  O    0.743688   0.004953  -0.168841  -0.000027   0.019467  -0.000014
              19         20         21         22         23         24
     1  C    0.000001   0.000000  -0.000004   0.000000   0.000000   0.001149
     2  C   -0.000001  -0.000018  -0.000149   0.000000   0.000000   0.019620
     3  C   -0.000242  -0.000709   0.003927  -0.000020   0.000002  -0.150101
     4  C    0.004410   0.000548  -0.000235   0.000009  -0.000005   0.004730
     5  C   -0.000170   0.000005  -0.000001   0.000000   0.000000  -0.000031
     6  C   -0.000004   0.000000   0.000001   0.000000   0.000000   0.000002
     7  H    0.000000   0.000000   0.000000   0.000000   0.000000  -0.000048
     8  H   -0.000001  -0.000006  -0.000077   0.000000   0.000000   0.022800
     9  H   -0.000077   0.000000  -0.000001   0.000000   0.000000   0.000003
    10  H    0.000000   0.000000   0.000000   0.000000   0.000000   0.000000
    11  C   -0.008643  -0.001583   0.000069   0.000016  -0.000423  -0.001216
    12  O    0.023049   0.000018   0.000003   0.000000  -0.000004   0.000000
    13  C    0.000119   0.013910  -0.009785  -0.000275   0.000016   0.743688
    14  C   -0.062083  -0.041430   0.004188  -0.000433   0.010089   0.004953
    15  C    0.004324  -0.036469  -0.057191   0.006997  -0.000037  -0.168841
    16  C    0.399998  -0.033796  -0.000754   0.005731  -0.087817  -0.000027
    17  C   -0.001376   0.475650   0.396623  -0.036637   0.007953   0.019467
    18  C   -0.044279   0.435215   0.006421  -0.048367   0.290211  -0.000014
    19  H    0.441539   0.006674   0.000067  -0.000125  -0.004740   0.000003
    20  C    0.006674   5.040459  -0.037721   0.399142  -0.081012   0.001798
    21  H    0.000067  -0.037721   0.444313  -0.006352  -0.000239   0.023468
    22  H   -0.000125   0.399142  -0.006352   0.434685  -0.003643  -0.000052
    23  Br  -0.004740  -0.081012  -0.000239  -0.003643  34.852077   0.000000
    24  O    0.000003   0.001798   0.023468  -0.000052   0.000000   7.841588
 Mulliken charges:
               1
     1  C   -0.180305
     2  C   -0.173412
     3  C   -0.033493
     4  C   -0.047132
     5  C   -0.171585
     6  C   -0.180840
     7  H    0.230757
     8  H    0.223171
     9  H    0.224583
    10  H    0.230871
    11  C    0.254284
    12  O   -0.339289
    13  C    0.238745
    14  C   -0.040705
    15  C   -0.052983
    16  C   -0.131003
    17  C   -0.164769
    18  C   -0.125162
    19  H    0.241556
    20  C   -0.140674
    21  H    0.233430
    22  H    0.249326
    23  Br   0.017571
    24  O   -0.362941
 Sum of Mulliken charges =   0.00000
 Mulliken charges with hydrogens summed into heavy atoms:
               1
     1  C    0.050452
     2  C    0.049759
     3  C   -0.033493
     4  C   -0.047132
     5  C    0.052997
     6  C    0.050032
    11  C    0.254284
    12  O   -0.339289
    13  C    0.238745
    14  C   -0.040705
    15  C   -0.052983
    16  C    0.110553
    17  C    0.068660
    18  C   -0.125162
    20  C    0.108652
    23  Br   0.017571
    24  O   -0.362941
 Electronic spatial extent (au):  <R**2>=           6156.6653
 Charge=              0.0000 electrons
 Dipole moment (field-independent basis, Debye):
    X=              1.6757    Y=              0.1864    Z=             -1.0595  Tot=              1.9913
 Quadrupole moment (field-independent basis, Debye-Ang):
   XX=            -82.7327   YY=           -117.4651   ZZ=           -111.7547
   XY=            -10.4532   XZ=             -2.5505   YZ=              0.6632
 Traceless Quadrupole moment (field-independent basis, Debye-Ang):
   XX=             21.2515   YY=            -13.4809   ZZ=             -7.7705
   XY=            -10.4532   XZ=             -2.5505   YZ=              0.6632
 Octapole moment (field-independent basis, Debye-Ang**2):
  XXX=              6.9231  YYY=            -16.5221  ZZZ=              0.2296  XYY=            -64.1847
  XXY=            -25.1089  XXZ=            -14.0974  XZZ=            -48.8073  YZZ=             -4.3492
  YYZ=            -10.2835  XYZ=              0.8127
 Hexadecapole moment (field-independent basis, Debye-Ang**3):
 XXXX=          -4871.4434 YYYY=          -1465.6153 ZZZZ=           -136.0698 XXXY=            -24.4390
 XXXZ=            -54.7856 YYYX=            -53.3271 YYYZ=              4.2794 ZZZX=             18.9645
 ZZZY=             -0.7655 XXYY=          -1116.2061 XXZZ=          -1061.9488 YYZZ=           -257.3553
 XXYZ=              3.2067 YYXZ=            -10.6301 ZZXY=             28.1499
 N-N= 1.373141505888D+03 E-N=-1.050235120453D+04  KE= 3.256553394379D+03
 No NMR shielding tensors so no spin-rotation constants.
 Leave Link  601 at Sun Jan 12 16:41:28 2020, MaxMem=   134217728 cpu:         2.0
 (Enter E:\Gaussian\G09W\l701.exe)
 Compute integral first derivatives.
 ... and contract with generalized density number  6.
 R6Disp: Adding Grimme-D3(BJ) dispersion energy 1st derivatives to the gradient.
 D1PCM: PCM CHGder 1st derivatives, ID1Alg=3 FixD1E=F DoIter=F DoCFld=F I1PDM=6.
 GePol: Maximum number of non-zero 1st derivatives   =     347
 Leave Link  701 at Sun Jan 12 16:42:28 2020, MaxMem=   134217728 cpu:        60.0
 (Enter E:\Gaussian\G09W\l702.exe)
 L702 exits ... SP integral derivatives will be done elsewhere.
 Leave Link  702 at Sun Jan 12 16:42:28 2020, MaxMem=   134217728 cpu:         0.0
 (Enter E:\Gaussian\G09W\l703.exe)
 Compute integral first derivatives, UseDBF=F ICtDFT=           0.
 Integral derivatives from FoFJK, PRISM(SPDF).
 Calling FoFJK, ICntrl=  10005127 FMM=F ISym2X=0 I1Cent= 0 IOpClX= 0 NMat=1 NMatS=1 NMatT=0.
 FoFJK:  IHMeth= 1 ICntrl=10005127 DoSepK=F KAlg= 0 I1Cent=   0 FoldK=F
 IRaf=         0 NMat=   1 IRICut=       1 DoRegI=T DoRafI=F ISym2E= 0.
 FoFCou: FMM=F IPFlag=           0 FMFlag=      100000 FMFlg1=         800
         NFxFlg=           0 DoJE=F BraDBF=F KetDBF=F FulRan=T
         wScrn=  0.000000 ICntrl=10005127 IOpCl=  0 I1Cent=           0 NGrid=           0
         NMat0=    1 NMatS0=      1 NMatT0=    0 NMatD0=    1 NMtDS0=    0 NMtDT0=    0
 Symmetry not used in FoFCou.
 Leave Link  703 at Sun Jan 12 16:46:52 2020, MaxMem=   134217728 cpu:       263.0
 (Enter E:\Gaussian\G09W\l716.exe)
 Dipole        =-1.42011789D+00 5.26767698D-01-4.44962949D-01
 ***** Axes restored to original set *****
 -------------------------------------------------------------------
 Center     Atomic                   Forces (Hartrees/Bohr)
 Number     Number              X              Y              Z
 -------------------------------------------------------------------
      1        6           0.001157265   -0.000216283   -0.000341679
      2        6           0.000120600   -0.000094792   -0.000926592
      3        6          -0.003729288    0.001276672    0.001226794
      4        6          -0.002486912   -0.001334125    0.001498435
      5        6           0.000957592    0.002123965   -0.000966611
      6        6           0.000156670    0.000516916   -0.000076728
      7        1           0.000339014   -0.000224722    0.000042826
      8        1           0.000296610   -0.000219275   -0.000023384
      9        1           0.000972161    0.000546348   -0.000355639
     10        1           0.000161331    0.000408983   -0.000007795
     11        6           0.002098477   -0.007536591   -0.004501063
     12        8          -0.001069987    0.006492244    0.004037402
     13        6           0.005980291   -0.005317308    0.000898223
     14        6           0.003248582   -0.007041738   -0.000104744
     15        6          -0.002471584    0.008767910    0.000714320
     16        6          -0.001044751    0.002383924   -0.000684739
     17        6           0.001446704   -0.000334249   -0.000588535
     18        6           0.000145679   -0.006622555   -0.000161086
     19        1          -0.001162697    0.000129035   -0.000119820
     20        6          -0.003428469    0.006025590   -0.000511370
     21        1          -0.000186831   -0.000182520    0.000191001
     22        1          -0.000039583   -0.000631627    0.000063341
     23       35          -0.000640188    0.000815586    0.000182721
     24        8          -0.000820685    0.000268617    0.000514721
 -------------------------------------------------------------------
 Cartesian Forces:  Max     0.008767910 RMS     0.002618703
 Leave Link  716 at Sun Jan 12 16:46:54 2020, MaxMem=   134217728 cpu:         1.0
 (Enter E:\Gaussian\G09W\l103.exe)

 GradGradGradGradGradGradGradGradGradGradGradGradGradGradGradGradGradGrad
 Berny optimization.
 FormGI is forming the generalized inverse of G from B-inverse, IUseBI=4.
 Internal  Forces:  Max     0.007098279 RMS     0.001290790
 Search for a local minimum.
 Step number   1 out of a maximum of  142
 All quantities printed in internal units (Hartrees-Bohrs-Radians)
 RMS Force = .12908D-02 SwitMx=.10000D-02 MixMth= 1
 Mixed Optimization -- RFO/linear search
 Second derivative matrix not updated -- first step.
 ITU=  0
     Eigenvalues ---    0.01211   0.01321   0.01386   0.01409   0.01529
     Eigenvalues ---    0.01592   0.01643   0.01701   0.01786   0.01798
     Eigenvalues ---    0.01899   0.02023   0.02075   0.02082   0.02113
     Eigenvalues ---    0.02143   0.02158   0.02176   0.02181   0.02228
     Eigenvalues ---    0.02260   0.15997   0.16000   0.16000   0.16000
     Eigenvalues ---    0.16000   0.16000   0.16000   0.19493   0.22000
     Eigenvalues ---    0.22412   0.22574   0.23506   0.24465   0.24589
     Eigenvalues ---    0.24877   0.24948   0.24998   0.24998   0.25000
     Eigenvalues ---    0.25000   0.33560   0.34598   0.35417   0.35427
     Eigenvalues ---    0.35581   0.35600   0.35704   0.35706   0.35809
     Eigenvalues ---    0.35891   0.36409   0.37705   0.38781   0.39054
     Eigenvalues ---    0.39817   0.41287   0.43487   0.43924   0.44363
     Eigenvalues ---    0.46713   0.47113   0.48113   0.51884   0.77232
     Eigenvalues ---    0.84533
 RFO step:  Lambda=-1.49929774D-03 EMin= 1.21086314D-02
 Linear search not attempted -- first point.
 Iteration  1 RMS(Cart)=  0.04342807 RMS(Int)=  0.00085245
 Iteration  2 RMS(Cart)=  0.00112335 RMS(Int)=  0.00012213
 Iteration  3 RMS(Cart)=  0.00000044 RMS(Int)=  0.00012213
 ITry= 1 IFail=0 DXMaxC= 2.96D-01 DCOld= 1.00D+10 DXMaxT= 3.00D-01 DXLimC= 3.00D+00 Rises=F
 Variable       Old X    -DE/DX   Delta X   Delta X   Delta X     New X
                                 (Linear)    (Quad)   (Total)
    R1        2.61542  -0.00126   0.00000  -0.00256  -0.00257   2.61285
    R2        2.65653  -0.00084   0.00000  -0.00191  -0.00190   2.65463
    R3        2.05004  -0.00039   0.00000  -0.00108  -0.00108   2.04896
    R4        2.66051  -0.00174   0.00000  -0.00383  -0.00384   2.65667
    R5        2.04743  -0.00027   0.00000  -0.00075  -0.00075   2.04668
    R6        2.67536  -0.00025   0.00000  -0.00066  -0.00065   2.67472
    R7        2.76852  -0.00036   0.00000  -0.00140  -0.00146   2.76705
    R8        2.66549  -0.00377   0.00000  -0.00860  -0.00859   2.65690
    R9        2.77611   0.00121   0.00000   0.00363   0.00371   2.77982
   R10        2.61224  -0.00044   0.00000  -0.00097  -0.00096   2.61128
   R11        2.04712  -0.00033   0.00000  -0.00093  -0.00093   2.04619
   R12        2.04988  -0.00039   0.00000  -0.00110  -0.00110   2.04877
   R13        2.35560  -0.00710   0.00000  -0.00838  -0.00838   2.34722
   R14        2.76567  -0.00014   0.00000   0.00003   0.00010   2.76578
   R15        2.71787  -0.00483   0.00000  -0.01232  -0.01240   2.70546
   R16        2.39444   0.00037   0.00000   0.00048   0.00048   2.39492
   R17        2.76209   0.00513   0.00000   0.01418   0.01415   2.77624
   R18        2.61704  -0.00381   0.00000  -0.00788  -0.00789   2.60915
   R19        2.73058  -0.00136   0.00000  -0.00335  -0.00337   2.72721
   R20        2.65016  -0.00132   0.00000  -0.00303  -0.00302   2.64715
   R21        2.04544  -0.00036   0.00000  -0.00101  -0.00101   2.04442
   R22        2.56912  -0.00274   0.00000  -0.00514  -0.00514   2.56398
   R23        2.04381  -0.00014   0.00000  -0.00039  -0.00039   2.04343
   R24        2.72018   0.00517   0.00000   0.01287   0.01289   2.73307
   R25        3.54449  -0.00085   0.00000  -0.00435  -0.00435   3.54014
   R26        2.04547  -0.00044   0.00000  -0.00122  -0.00122   2.04425
    A1        2.09621   0.00009   0.00000   0.00069   0.00068   2.09689
    A2        2.09202   0.00006   0.00000   0.00030   0.00030   2.09233
    A3        2.09495  -0.00015   0.00000  -0.00099  -0.00098   2.09396
    A4        2.10895  -0.00084   0.00000  -0.00329  -0.00330   2.10565
    A5        2.10658   0.00068   0.00000   0.00326   0.00327   2.10985
    A6        2.06764   0.00016   0.00000   0.00003   0.00003   2.06767
    A7        2.07761   0.00082   0.00000   0.00339   0.00343   2.08104
    A8        2.07946   0.00013   0.00000  -0.00001   0.00005   2.07951
    A9        2.12585  -0.00094   0.00000  -0.00304  -0.00324   2.12261
   A10        2.08286  -0.00019   0.00000  -0.00144  -0.00147   2.08139
   A11        2.12357   0.00047   0.00000   0.00357   0.00351   2.12709
   A12        2.07675  -0.00027   0.00000  -0.00211  -0.00214   2.07461
   A13        2.10697   0.00013   0.00000   0.00059   0.00059   2.10756
   A14        2.07050  -0.00118   0.00000  -0.00722  -0.00724   2.06326
   A15        2.10572   0.00106   0.00000   0.00665   0.00664   2.11235
   A16        2.09369  -0.00001   0.00000  -0.00001   0.00000   2.09369
   A17        2.09587  -0.00021   0.00000  -0.00130  -0.00130   2.09456
   A18        2.09363   0.00021   0.00000   0.00131   0.00131   2.09494
   A19        2.13613   0.00049   0.00000   0.00067  -0.00003   2.13610
   A20        2.02942  -0.00059   0.00000   0.00031  -0.00036   2.02906
   A21        2.11763   0.00010   0.00000  -0.00091  -0.00160   2.11603
   A22        2.04563   0.00270   0.00000   0.01138   0.01098   2.05661
   A23        2.14609  -0.00227   0.00000  -0.00940  -0.00939   2.13670
   A24        2.09145  -0.00043   0.00000  -0.00211  -0.00211   2.08934
   A25        2.11086  -0.00002   0.00000   0.00218   0.00213   2.11299
   A26        2.09036   0.00043   0.00000   0.00010   0.00015   2.09051
   A27        2.08188  -0.00041   0.00000  -0.00236  -0.00239   2.07950
   A28        2.11542  -0.00147   0.00000  -0.00474  -0.00495   2.11047
   A29        2.09293   0.00038   0.00000   0.00033   0.00048   2.09340
   A30        2.07482   0.00109   0.00000   0.00438   0.00443   2.07925
   A31        2.09401  -0.00010   0.00000  -0.00027  -0.00028   2.09372
   A32        2.08496  -0.00109   0.00000  -0.00695  -0.00694   2.07802
   A33        2.10419   0.00119   0.00000   0.00721   0.00722   2.11142
   A34        2.11211  -0.00110   0.00000  -0.00432  -0.00437   2.10774
   A35        2.05716   0.00034   0.00000   0.00079   0.00080   2.05796
   A36        2.11377   0.00076   0.00000   0.00344   0.00346   2.11723
   A37        2.12668   0.00033   0.00000   0.00130   0.00130   2.12798
   A38        2.08241   0.00086   0.00000   0.00343   0.00342   2.08584
   A39        2.07403  -0.00118   0.00000  -0.00468  -0.00469   2.06935
   A40        2.07625   0.00019   0.00000   0.00106   0.00105   2.07730
   A41        2.11475   0.00038   0.00000   0.00240   0.00238   2.11713
   A42        2.09219  -0.00056   0.00000  -0.00345  -0.00346   2.08873
    D1       -0.00434  -0.00004   0.00000  -0.00300  -0.00299  -0.00734
    D2       -3.13924  -0.00001   0.00000  -0.00253  -0.00255   3.14139
    D3        3.13290  -0.00006   0.00000  -0.00270  -0.00268   3.13022
    D4       -0.00200  -0.00004   0.00000  -0.00223  -0.00224  -0.00424
    D5       -0.00526  -0.00004   0.00000  -0.00135  -0.00132  -0.00658
    D6        3.13428   0.00004   0.00000   0.00257   0.00258   3.13686
    D7        3.14068  -0.00002   0.00000  -0.00165  -0.00164   3.13905
    D8       -0.00296   0.00006   0.00000   0.00227   0.00226  -0.00070
    D9        0.01314   0.00011   0.00000   0.00545   0.00542   0.01856
   D10       -3.10431  -0.00012   0.00000  -0.01029  -0.01037  -3.11469
   D11       -3.13500   0.00009   0.00000   0.00500   0.00501  -3.13000
   D12        0.03073  -0.00014   0.00000  -0.01074  -0.01079   0.01994
   D13       -0.01240  -0.00010   0.00000  -0.00359  -0.00356  -0.01597
   D14        3.13072  -0.00042   0.00000  -0.02019  -0.02011   3.11062
   D15        3.10438   0.00015   0.00000   0.01263   0.01269   3.11707
   D16       -0.03568  -0.00017   0.00000  -0.00396  -0.00386  -0.03953
   D17        3.01510   0.00083   0.00000   0.06012   0.06024   3.07534
   D18       -0.13126   0.00044   0.00000   0.02984   0.02991  -0.10135
   D19       -0.10166   0.00056   0.00000   0.04383   0.04396  -0.05770
   D20        3.03516   0.00018   0.00000   0.01355   0.01363   3.04879
   D21        0.00306   0.00001   0.00000  -0.00070  -0.00072   0.00233
   D22       -3.13659  -0.00016   0.00000  -0.00786  -0.00782   3.13877
   D23       -3.14003   0.00032   0.00000   0.01545   0.01532  -3.12470
   D24        0.00351   0.00014   0.00000   0.00829   0.00823   0.01174
   D25       -2.98179  -0.00143   0.00000  -0.10802  -0.10807  -3.08987
   D26        0.15852  -0.00062   0.00000  -0.03976  -0.03969   0.11883
   D27        0.16133  -0.00174   0.00000  -0.12456  -0.12456   0.03677
   D28       -2.98155  -0.00093   0.00000  -0.05630  -0.05617  -3.03772
   D29        0.00584   0.00005   0.00000   0.00319   0.00317   0.00902
   D30       -3.13370  -0.00002   0.00000  -0.00073  -0.00073  -3.13443
   D31       -3.13773   0.00023   0.00000   0.01047   0.01046  -3.12728
   D32        0.00591   0.00016   0.00000   0.00656   0.00656   0.01247
   D33       -0.14771   0.00069   0.00000   0.04284   0.04275  -0.10496
   D34        2.97973   0.00061   0.00000   0.03596   0.03584   3.01557
   D35        2.99261   0.00149   0.00000   0.11032   0.11029   3.10290
   D36       -0.16313   0.00141   0.00000   0.10344   0.10338  -0.05975
   D37        0.11064  -0.00057   0.00000  -0.04042  -0.04050   0.07014
   D38       -3.03759  -0.00065   0.00000  -0.04588  -0.04601  -3.08360
   D39       -3.02634  -0.00019   0.00000  -0.01111  -0.01100  -3.03734
   D40        0.10861  -0.00027   0.00000  -0.01657  -0.01651   0.09210
   D41        0.01517   0.00007   0.00000  -0.00245  -0.00253   0.01263
   D42       -3.11986   0.00014   0.00000   0.00298   0.00295  -3.11691
   D43       -3.11235   0.00014   0.00000   0.00438   0.00431  -3.10803
   D44        0.03582   0.00021   0.00000   0.00980   0.00980   0.04561
   D45        3.13701  -0.00002   0.00000   0.00070   0.00075   3.13776
   D46        0.00256  -0.00002   0.00000   0.00084   0.00088   0.00344
   D47       -0.01849  -0.00010   0.00000  -0.00603  -0.00599  -0.02448
   D48        3.13024  -0.00009   0.00000  -0.00589  -0.00586   3.12438
   D49        3.10951  -0.00001   0.00000   0.00034   0.00043   3.10994
   D50       -0.01354   0.00011   0.00000   0.00586   0.00592  -0.00762
   D51       -0.03857  -0.00010   0.00000  -0.00503  -0.00502  -0.04358
   D52        3.12157   0.00003   0.00000   0.00048   0.00048   3.12205
   D53        0.00280  -0.00005   0.00000  -0.00224  -0.00222   0.00058
   D54       -3.12694  -0.00014   0.00000  -0.00742  -0.00742  -3.13436
   D55        3.13717  -0.00006   0.00000  -0.00244  -0.00241   3.13476
   D56        0.00743  -0.00015   0.00000  -0.00763  -0.00761  -0.00018
   D57        0.02306  -0.00007   0.00000  -0.00317  -0.00316   0.01990
   D58       -3.11972   0.00013   0.00000   0.00570   0.00572  -3.11401
   D59       -3.13768  -0.00021   0.00000  -0.00890  -0.00887   3.13663
   D60        0.00272   0.00000   0.00000  -0.00003   0.00000   0.00272
   D61       -0.00485   0.00015   0.00000   0.00704   0.00704   0.00218
   D62        3.13791  -0.00005   0.00000  -0.00172  -0.00169   3.13622
   D63        3.12494   0.00025   0.00000   0.01225   0.01225   3.13719
   D64       -0.01548   0.00005   0.00000   0.00350   0.00352  -0.01196
         Item               Value     Threshold  Converged?
 Maximum Force            0.007098     0.000450     NO 
 RMS     Force            0.001291     0.000300     NO 
 Maximum Displacement     0.296361     0.001800     NO 
 RMS     Displacement     0.043353     0.001200     NO 
 Predicted change in Energy=-8.037485D-04
 Lowest energy point so far.  Saving SCF results.
 GradGradGradGradGradGradGradGradGradGradGradGradGradGradGradGradGradGrad

 Leave Link  103 at Sun Jan 12 16:46:56 2020, MaxMem=   134217728 cpu:         2.0
 (Enter E:\Gaussian\G09W\l202.exe)
                          Input orientation:                          
 ---------------------------------------------------------------------
 Center     Atomic      Atomic             Coordinates (Angstroms)
 Number     Number       Type             X           Y           Z
 ---------------------------------------------------------------------
      1          6           0       -5.045267    0.075523    0.193270
      2          6           0       -4.012944    0.991178    0.105883
      3          6           0       -2.678013    0.559608    0.015766
      4          6           0       -2.400221   -0.828067   -0.007585
      5          6           0       -3.463963   -1.743296    0.079389
      6          6           0       -4.769190   -1.301819    0.183942
      7          1           0       -6.069523    0.422189    0.272914
      8          1           0       -4.212077    2.055753    0.111804
      9          1           0       -3.232528   -2.800840    0.057274
     10          1           0       -5.579963   -2.017864    0.257007
     11          6           0       -1.028795   -1.343588   -0.139198
     12          8           0       -0.778845   -2.557923   -0.214780
     13          6           0       -1.608119    1.557689   -0.041003
     14          6           0        0.044179   -0.349439   -0.089438
     15          6           0       -0.255644    1.088185   -0.048689
     16          6           0        1.361057   -0.762961   -0.055165
     17          6           0        0.835015    2.033128   -0.031333
     18          6           0        2.391207    0.185305   -0.012145
     19          1           0        1.579723   -1.822404   -0.068978
     20          6           0        2.122608    1.606383   -0.001387
     21          1           0        0.591827    3.086701   -0.019982
     22          1           0        2.946102    2.306804    0.037298
     23         35           0        4.173821   -0.389666    0.022263
     24          8           0       -1.841946    2.800743   -0.120252
 ---------------------------------------------------------------------
                    Distance matrix (angstroms):
                    1          2          3          4          5
     1  C    0.000000
     2  C    1.382662   0.000000
     3  C    2.422754   1.405850   0.000000
     4  C    2.802336   2.433804   1.415400   0.000000
     5  C    2.412798   2.789163   2.434160   1.405971   0.000000
     6  C    1.404769   2.415748   2.804678   2.423456   1.381829
     7  H    1.084261   2.140366   3.404020   3.886592   3.393482
     8  H    2.149919   1.083055   2.145000   3.407857   3.872143
     9  H    3.402643   3.871797   3.406145   2.142142   1.082798
    10  H    2.161534   3.395986   3.888814   3.405346   2.141120
    11  C    4.272758   3.796887   2.523112   1.471018   2.477416
    12  O    5.030298   4.812312   3.657731   2.379956   2.821349
    13  C    3.750426   2.475014   1.464262   2.514036   3.788820
    14  C    5.114976   4.277342   2.871892   2.492164   3.778677
    15  C    4.901481   3.761729   2.480205   2.876268   4.281004
    16  C    6.465737   5.655336   4.250683   3.762142   4.925441
    17  C    6.201643   4.960563   3.809835   4.318999   5.723185
    18  C    7.440121   6.455735   5.083097   4.897420   6.165297
    19  H    6.896477   6.262966   4.879496   4.102734   5.046487
    20  C    7.332112   6.167251   4.913450   5.136397   6.514342
    21  H    6.394490   5.060728   4.132714   4.927262   6.307787
    22  H    8.298489   7.082647   5.889297   6.197790   7.582480
    23  Br   9.232401   8.302821   6.917282   6.588711   7.757017
    24  O    4.217391   2.835294   2.395870   3.673232   4.828984
                    6          7          8          9         10
     6  C    0.000000
     7  H    2.161247   0.000000
     8  H    3.404243   2.478829   0.000000
     9  H    2.150451   4.299181   4.954693   0.000000
    10  H    1.084164   2.488730   4.299598   2.482620   0.000000
    11  C    3.754560   5.356935   4.663883   2.649268   4.617874
    12  O    4.202336   6.091814   5.760186   2.480641   4.854378
    13  C    4.268461   4.614329   2.655563   4.652434   5.352470
    14  C    4.914294   6.172849   4.892971   4.094838   5.876619
    15  C    5.112566   5.860731   4.076188   4.898732   6.171658
    16  C    6.158528   7.531649   6.247627   5.026590   7.060452
    17  C    6.524977   7.096501   5.049172   6.318227   7.592471
    18  C    7.315823   8.468844   6.864204   6.367752   8.274415
    19  H    6.375239   7.979101   6.972641   4.912335   7.169768
    20  C    7.482571   8.281822   6.351613   6.935743   8.516545
    21  H    6.931175   7.180459   4.915050   7.021025   8.014006
    22  H    8.518767   9.213511   7.162967   8.016476   9.562678
    23  Br   8.990862  10.278523   8.735638   7.789030   9.891534
    24  O    5.048991   4.866673   2.495272   5.774337   6.110161
                   11         12         13         14         15
    11  C    0.000000
    12  O    1.242093   0.000000
    13  C    2.960181   4.201923   0.000000
    14  C    1.463586   2.360187   2.523801   0.000000
    15  C    2.553326   3.687198   1.431670   1.469121   0.000000
    16  C    2.460809   2.797596   3.768504   1.380703   2.457744
    17  C    3.858450   4.869902   2.488983   2.511060   1.443176
    18  C    3.748342   4.197093   4.228342   2.408415   2.796846
    19  H    2.653028   2.474891   4.646305   2.127895   3.441005
    20  C    4.318873   5.079903   3.731255   2.855321   2.434513
    21  H    4.718908   5.811924   2.679193   3.480201   2.170967
    22  H    5.399659   6.132237   4.616083   3.936094   3.426894
    23  Br   5.291810   5.411693   6.101395   4.131348   4.670036
    24  O    4.223394   5.463920   1.267335   3.671793   2.335451
                   16         17         18         19         20
    16  C    0.000000
    17  C    2.845242   0.000000
    18  C    1.400810   2.415896   0.000000
    19  H    1.081862   3.926975   2.166248   0.000000
    20  C    2.489306   1.356799   1.446279   3.472157   0.000000
    21  H    3.925920   1.081335   3.414078   5.007759   2.129549
    22  H    3.456063   2.129858   2.193424   4.350706   1.081770
    23  Br   2.838483   4.125582   1.873363   2.964862   2.862210
    24  O    4.792019   2.786263   4.977127   5.751864   4.142260
                   21         22         23         24
    21  H    0.000000
    22  H    2.480752   0.000000
    23  Br   4.991752   2.962848   0.000000
    24  O    2.452565   4.816036   6.810908   0.000000
 Stoichiometry    C14H7BrO2
 Framework group  C1[X(C14H7BrO2)]
 Deg. of freedom    66
 Full point group                 C1      NOp   1
 RotChk:  IX=0 Diff= 1.28D-02
 Largest Abelian subgroup         C1      NOp   1
 Largest concise Abelian subgroup C1      NOp   1
                         Standard orientation:                         
 ---------------------------------------------------------------------
 Center     Atomic      Atomic             Coordinates (Angstroms)
 Number     Number       Type             X           Y           Z
 ---------------------------------------------------------------------
      1          6           0        5.047365    0.081087   -0.150530
      2          6           0        4.013135    0.995361   -0.071627
      3          6           0        2.678004    0.562024    0.006216
      4          6           0        2.401786   -0.826022    0.025965
      5          6           0        3.467429   -1.739829   -0.052245
      6          6           0        4.772973   -1.296611   -0.144781
      7          1           0        6.071848    0.429118   -0.220743
      8          1           0        4.210955    2.060191   -0.074909
      9          1           0        3.237155   -2.797683   -0.033052
     10          1           0        5.585280   -2.011566   -0.211180
     11          6           0        1.029898   -1.343390    0.144908
     12          8           0        0.780832   -2.558102    0.217273
     13          6           0        1.606373    1.558700    0.054234
     14          6           0       -0.043857   -0.350562    0.086370
     15          6           0        0.254484    1.087474    0.049461
     16          6           0       -1.359847   -0.765726    0.040003
     17          6           0       -0.837181    2.031046    0.023128
     18          6           0       -2.390781    0.181267   -0.011450
     19          1           0       -1.577276   -1.825457    0.051007
     20          6           0       -2.123910    1.602693   -0.018661
     21          1           0       -0.595246    3.084936    0.014800
     22          1           0       -2.947918    2.302100   -0.064133
     23         35           0       -4.172282   -0.395936   -0.062242
     24          8           0        1.837897    2.801984    0.136571
 ---------------------------------------------------------------------
 Rotational constants (GHZ):      0.9830292      0.1798684      0.1522787
 Leave Link  202 at Sun Jan 12 16:46:56 2020, MaxMem=   134217728 cpu:         0.0
 (Enter E:\Gaussian\G09W\l301.exe)
 Standard basis: 6-311G(d) (5D, 7F)
 Ernie: Thresh=  0.10000D-02 Tol=  0.10000D-05 Strict=F.
 There are   372 symmetry adapted cartesian basis functions of A   symmetry.
 There are   353 symmetry adapted basis functions of A   symmetry.
   353 basis functions,   637 primitive gaussians,   372 cartesian basis functions
    71 alpha electrons       71 beta electrons
       nuclear repulsion energy      1374.2556339109 Hartrees.
 IExCor=  402 DFT=T Ex+Corr=B3LYP ExCW=0 ScaHFX=  0.200000
 ScaDFX=  0.800000  0.720000  1.000000  0.810000 ScalE2=  1.000000  1.000000
 IRadAn=      0 IRanWt=     -1 IRanGd=            0 ICorTp=0 IEmpDi=141
 NAtoms=   24 NActive=   24 NUniq=   24 SFac= 1.00D+00 NAtFMM=   60 NAOKFM=F Big=F
 Integral buffers will be    262144 words long.
 Regular integral format.
 Two-electron integral symmetry is turned on.
 R6Disp:  Grimme-D3(BJ) Dispersion energy=       -0.0619868034 Hartrees.
 Nuclear repulsion after empirical dispersion term =     1374.1936471076 Hartrees.
 ------------------------------------------------------------------------------
 Polarizable Continuum Model (PCM)
 =================================
 Model                : PCM (using non-symmetric T matrix).
 Atomic radii         : UFF (Universal Force Field).
 Polarization charges : Total charges.
 Charge compensation  : None.
 Solution method      : On-the-fly selection.
 Cavity type          : Scaled VdW (van der Waals Surface) (Alpha=1.100).
 Cavity algorithm     : GePol (No added spheres)
                        Default sphere list used, NSphG=   24.
                        Lebedev-Laikov grids with approx.  5.0 points / Ang**2.
                        Smoothing algorithm: Karplus/York (Gamma=1.0000).
                        Polarization charges: spherical gaussians, with
                                              point-specific exponents (IZeta= 3).
                        Self-potential: point-specific (ISelfS= 7).
                        Self-field    : sphere-specific E.n sum rule (ISelfD= 2).
 1st derivatives      : Analytical E(r).r(x)/FMM algorithm (CHGder, D1EAlg=3).
                        Cavity 1st derivative terms included.
 Solvent              : Acetonitrile, Eps=  35.688000 Eps(inf)=   1.806874
 ------------------------------------------------------------------------------
 GePol: Number of generator spheres                  =      24
 GePol: Total number of spheres                      =      24
 GePol: Number of exposed spheres                    =      24 (100.00%)
 GePol: Number of points                             =    2166
 GePol: Average weight of points                     =       0.13
 GePol: Minimum weight of points                     =   0.43D-11
 GePol: Maximum weight of points                     =    0.20577
 GePol: Number of points with low weight             =     119
 GePol: Fraction of low-weight points (<1% of avg)   =       5.49%
 GePol: Cavity surface area                          =    279.900 Ang**2
 GePol: Cavity volume                                =    305.981 Ang**3
 Leave Link  301 at Sun Jan 12 16:46:57 2020, MaxMem=   134217728 cpu:         1.0
 (Enter E:\Gaussian\G09W\l302.exe)
 NPDir=0 NMtPBC=     1 NCelOv=     1 NCel=       1 NClECP=     1 NCelD=      1
         NCelK=      1 NCelE2=     1 NClLst=     1 CellRange=     0.0.
 One-electron integrals computed using PRISM.
 NBasis=   353 RedAO= T EigKep=  1.03D-04  NBF=   353
 NBsUse=   353 1.00D-06 EigRej= -1.00D+00 NBFU=   353
 Precomputing XC quadrature grid using
 IXCGrd= 4 IRadAn=           0 IRanWt=          -1 IRanGd=           0 AccXCQ= 0.00D+00.
 Generated NRdTot=       0 NPtTot=           0 NUsed=           0 NTot=          16
 NSgBfM=   363   363   363   363   363 MxSgAt=    24 MxSgA2=    24.
 Leave Link  302 at Sun Jan 12 16:47:00 2020, MaxMem=   134217728 cpu:         3.0
 (Enter E:\Gaussian\G09W\l308.exe)
 Leave Link  308 at Sun Jan 12 16:47:01 2020, MaxMem=   134217728 cpu:         1.0
 (Enter E:\Gaussian\G09W\l303.exe)
 DipDrv:  MaxL=1.
 Leave Link  303 at Sun Jan 12 16:47:02 2020, MaxMem=   134217728 cpu:         1.0
 (Enter E:\Gaussian\G09W\l401.exe)
 Initial guess from the checkpoint file:  "E:\Gaussian file\error\2-BrAQ excited triplet state opt.chk"
 B after Tr=     0.000000    0.000000    0.000000
         Rot=    1.000000   -0.000338    0.000032   -0.000181 Ang=  -0.04 deg.
 Guess basis will be translated and rotated to current coordinates.
 JPrj=2 DoOrth=T DoCkMO=T.
 Generating alternative initial guess.
 ExpMin= 1.03D-01 ExpMax= 4.40D+05 ExpMxC= 1.51D+04 IAcc=2 IRadAn=         4 AccDes= 0.00D+00
 Harris functional with IExCor=  402 and IRadAn=       4 diagonalized for initial guess.
 HarFok:  IExCor=  402 AccDes= 0.00D+00 IRadAn=         4 IDoV= 1 UseB2=F ITyADJ=14
 ICtDFT=  3500011 ScaDFX=  1.000000  1.000000  1.000000  1.000000
 FoFCou: FMM=F IPFlag=           0 FMFlag=      100000 FMFlg1=           0
         NFxFlg=           0 DoJE=T BraDBF=F KetDBF=T FulRan=T
         wScrn=  0.000000 ICntrl=     500 IOpCl=  0 I1Cent=   200000004 NGrid=           0
         NMat0=    1 NMatS0=      1 NMatT0=    0 NMatD0=    1 NMtDS0=    0 NMtDT0=    0
 Petite list used in FoFCou.
 Harris En= -3262.59098119947    
 Leave Link  401 at Sun Jan 12 16:47:23 2020, MaxMem=   134217728 cpu:        21.0
 (Enter E:\Gaussian\G09W\l502.exe)
 Closed shell SCF:
 Using DIIS extrapolation, IDIIS=  1040.
 Integral symmetry usage will be decided dynamically.
 IVT=      438130 IEndB=      438130 NGot=   134217728 MDV=   133934995
 LenX=   133934995 LenY=   133796170
 Requested convergence on RMS density matrix=1.00D-08 within 128 cycles.
 Requested convergence on MAX density matrix=1.00D-06.
 Requested convergence on             energy=1.00D-06.
 No special actions if energy rises.
 Fock matrices will be formed incrementally for  20 cycles.

 Cycle   1  Pass 1  IDiag  1:
 FoFJK:  IHMeth= 1 ICntrl=       0 DoSepK=F KAlg= 0 I1Cent=   0 FoldK=F
 IRaf= 780000000 NMat=   1 IRICut=       1 DoRegI=T DoRafI=F ISym2E= 0.
 FoFCou: FMM=F IPFlag=           0 FMFlag=      100000 FMFlg1=           0
         NFxFlg=           0 DoJE=F BraDBF=F KetDBF=F FulRan=T
         wScrn=  0.000000 ICntrl=       0 IOpCl=  0 I1Cent=           0 NGrid=           0
         NMat0=    1 NMatS0=      1 NMatT0=    0 NMatD0=    1 NMtDS0=    0 NMtDT0=    0
 Symmetry not used in FoFCou.
 Inv3:  Mode=1 IEnd=    14074668.
 Iteration    1 A*A^-1 deviation from unit magnitude is 2.22D-15 for     34.
 Iteration    1 A*A^-1 deviation from orthogonality  is 2.30D-15 for   1584     40.
 Iteration    1 A^-1*A deviation from unit magnitude is 2.33D-15 for   1614.
 Iteration    1 A^-1*A deviation from orthogonality  is 3.26D-10 for   1625   1608.
 Iteration    2 A*A^-1 deviation from unit magnitude is 2.89D-15 for    264.
 Iteration    2 A*A^-1 deviation from orthogonality  is 4.05D-15 for   1115    845.
 Iteration    2 A^-1*A deviation from unit magnitude is 8.88D-16 for    202.
 Iteration    2 A^-1*A deviation from orthogonality  is 3.81D-16 for   1481   1259.
 E= -3262.52069791402    
 DIIS: error= 3.78D-03 at cycle   1 NSaved=   1.
 NSaved= 1 IEnMin= 1 EnMin= -3262.52069791402     IErMin= 1 ErrMin= 3.78D-03
 ErrMax= 3.78D-03  0.00D+00 EMaxC= 1.00D-01 BMatC= 5.12D-03 BMatP= 5.12D-03
 IDIUse=3 WtCom= 9.62D-01 WtEn= 3.78D-02
 Coeff-Com:  0.100D+01
 Coeff-En:   0.100D+01
 Coeff:      0.100D+01
 Gap=     0.805 Goal=   None    Shift=    0.000
 GapD=    0.805 DampG=2.000 DampE=1.000 DampFc=2.0000 IDamp=-1.
 RMSDP=3.57D-04 MaxDP=1.23D-02              OVMax= 3.03D-02

 Cycle   2  Pass 1  IDiag  1:
 RMSU=  3.57D-04    CP:  1.00D+00
 E= -3262.53007059691     Delta-E=       -0.009372682893 Rises=F Damp=F
 DIIS: error= 6.19D-04 at cycle   2 NSaved=   2.
 NSaved= 2 IEnMin= 2 EnMin= -3262.53007059691     IErMin= 2 ErrMin= 6.19D-04
 ErrMax= 6.19D-04  0.00D+00 EMaxC= 1.00D-01 BMatC= 1.21D-04 BMatP= 5.12D-03
 IDIUse=3 WtCom= 9.94D-01 WtEn= 6.19D-03
 Coeff-Com: -0.583D-01 0.106D+01
 Coeff-En:   0.000D+00 0.100D+01
 Coeff:     -0.579D-01 0.106D+01
 Gap=     0.129 Goal=   None    Shift=    0.000
 RMSDP=6.99D-05 MaxDP=2.23D-03 DE=-9.37D-03 OVMax= 4.00D-03

 Cycle   3  Pass 1  IDiag  1:
 RMSU=  6.78D-05    CP:  1.00D+00  1.05D+00
 E= -3262.53014447527     Delta-E=       -0.000073878353 Rises=F Damp=F
 DIIS: error= 8.23D-04 at cycle   3 NSaved=   3.
 NSaved= 3 IEnMin= 3 EnMin= -3262.53014447527     IErMin= 2 ErrMin= 6.19D-04
 ErrMax= 8.23D-04  0.00D+00 EMaxC= 1.00D-01 BMatC= 1.21D-04 BMatP= 1.21D-04
 IDIUse=3 WtCom= 9.92D-01 WtEn= 8.23D-03
 Coeff-Com: -0.416D-01 0.558D+00 0.484D+00
 Coeff-En:   0.000D+00 0.204D+00 0.796D+00
 Coeff:     -0.413D-01 0.555D+00 0.486D+00
 Gap=     0.129 Goal=   None    Shift=    0.000
 RMSDP=6.52D-05 MaxDP=2.67D-03 DE=-7.39D-05 OVMax= 3.74D-03

 Cycle   4  Pass 1  IDiag  1:
 RMSU=  3.85D-05    CP:  1.00D+00  1.07D+00  2.35D-01
 E= -3262.53021327326     Delta-E=       -0.000068797990 Rises=F Damp=F
 DIIS: error= 5.01D-04 at cycle   4 NSaved=   4.
 NSaved= 4 IEnMin= 4 EnMin= -3262.53021327326     IErMin= 4 ErrMin= 5.01D-04
 ErrMax= 5.01D-04  0.00D+00 EMaxC= 1.00D-01 BMatC= 3.81D-05 BMatP= 1.21D-04
 IDIUse=3 WtCom= 9.95D-01 WtEn= 5.01D-03
 Coeff-Com: -0.153D-01 0.178D+00 0.351D+00 0.486D+00
 Coeff-En:   0.000D+00 0.000D+00 0.268D+00 0.732D+00
 Coeff:     -0.152D-01 0.177D+00 0.351D+00 0.487D+00
 Gap=     0.129 Goal=   None    Shift=    0.000
 RMSDP=2.78D-05 MaxDP=1.33D-03 DE=-6.88D-05 OVMax= 1.33D-03

 Cycle   5  Pass 1  IDiag  1:
 RMSU=  8.79D-06    CP:  1.00D+00  1.07D+00  4.96D-01  5.00D-01
 E= -3262.53024153144     Delta-E=       -0.000028258180 Rises=F Damp=F
 DIIS: error= 5.40D-05 at cycle   5 NSaved=   5.
 NSaved= 5 IEnMin= 5 EnMin= -3262.53024153144     IErMin= 5 ErrMin= 5.40D-05
 ErrMax= 5.40D-05  0.00D+00 EMaxC= 1.00D-01 BMatC= 1.26D-06 BMatP= 3.81D-05
 IDIUse=1 WtCom= 1.00D+00 WtEn= 0.00D+00
 Coeff-Com: -0.447D-02 0.451D-01 0.145D+00 0.248D+00 0.566D+00
 Coeff:     -0.447D-02 0.451D-01 0.145D+00 0.248D+00 0.566D+00
 Gap=     0.129 Goal=   None    Shift=    0.000
 RMSDP=5.88D-06 MaxDP=2.40D-04 DE=-2.83D-05 OVMax= 3.59D-04

 Cycle   6  Pass 1  IDiag  1:
 RMSU=  3.32D-06    CP:  1.00D+00  1.07D+00  4.91D-01  5.54D-01  5.48D-01
 E= -3262.53024242595     Delta-E=       -0.000000894510 Rises=F Damp=F
 DIIS: error= 3.43D-05 at cycle   6 NSaved=   6.
 NSaved= 6 IEnMin= 6 EnMin= -3262.53024242595     IErMin= 6 ErrMin= 3.43D-05
 ErrMax= 3.43D-05  0.00D+00 EMaxC= 1.00D-01 BMatC= 2.55D-07 BMatP= 1.26D-06
 IDIUse=1 WtCom= 1.00D+00 WtEn= 0.00D+00
 Coeff-Com:  0.261D-03-0.990D-02 0.201D-01 0.588D-01 0.342D+00 0.589D+00
 Coeff:      0.261D-03-0.990D-02 0.201D-01 0.588D-01 0.342D+00 0.589D+00
 Gap=     0.129 Goal=   None    Shift=    0.000
 RMSDP=2.53D-06 MaxDP=8.21D-05 DE=-8.95D-07 OVMax= 1.56D-04

 Cycle   7  Pass 1  IDiag  1:
 RMSU=  9.29D-07    CP:  1.00D+00  1.07D+00  4.95D-01  5.56D-01  7.27D-01
                    CP:  5.24D-01
 E= -3262.53024262817     Delta-E=       -0.000000202221 Rises=F Damp=F
 DIIS: error= 1.47D-05 at cycle   7 NSaved=   7.
 NSaved= 7 IEnMin= 7 EnMin= -3262.53024262817     IErMin= 7 ErrMin= 1.47D-05
 ErrMax= 1.47D-05  0.00D+00 EMaxC= 1.00D-01 BMatC= 4.59D-08 BMatP= 2.55D-07
 IDIUse=1 WtCom= 1.00D+00 WtEn= 0.00D+00
 Coeff-Com:  0.610D-03-0.115D-01-0.176D-02 0.135D-01 0.164D+00 0.385D+00
 Coeff-Com:  0.450D+00
 Coeff:      0.610D-03-0.115D-01-0.176D-02 0.135D-01 0.164D+00 0.385D+00
 Coeff:      0.450D+00
 Gap=     0.129 Goal=   None    Shift=    0.000
 RMSDP=9.01D-07 MaxDP=3.64D-05 DE=-2.02D-07 OVMax= 5.16D-05

 Cycle   8  Pass 1  IDiag  1:
 RMSU=  3.59D-07    CP:  1.00D+00  1.07D+00  4.96D-01  5.59D-01  6.84D-01
                    CP:  6.64D-01  4.83D-01
 E= -3262.53024266564     Delta-E=       -0.000000037470 Rises=F Damp=F
 DIIS: error= 2.68D-06 at cycle   8 NSaved=   8.
 NSaved= 8 IEnMin= 8 EnMin= -3262.53024266564     IErMin= 8 ErrMin= 2.68D-06
 ErrMax= 2.68D-06  0.00D+00 EMaxC= 1.00D-01 BMatC= 2.15D-09 BMatP= 4.59D-08
 IDIUse=1 WtCom= 1.00D+00 WtEn= 0.00D+00
 Coeff-Com:  0.309D-03-0.531D-02-0.286D-02 0.203D-02 0.564D-01 0.153D+00
 Coeff-Com:  0.233D+00 0.564D+00
 Coeff:      0.309D-03-0.531D-02-0.286D-02 0.203D-02 0.564D-01 0.153D+00
 Coeff:      0.233D+00 0.564D+00
 Gap=     0.129 Goal=   None    Shift=    0.000
 RMSDP=2.76D-07 MaxDP=1.18D-05 DE=-3.75D-08 OVMax= 1.10D-05

 Cycle   9  Pass 1  IDiag  1:
 RMSU=  1.47D-07    CP:  1.00D+00  1.07D+00  4.96D-01  5.60D-01  6.99D-01
                    CP:  6.38D-01  5.58D-01  6.33D-01
 E= -3262.53024266712     Delta-E=       -0.000000001485 Rises=F Damp=F
 DIIS: error= 1.38D-06 at cycle   9 NSaved=   9.
 NSaved= 9 IEnMin= 9 EnMin= -3262.53024266712     IErMin= 9 ErrMin= 1.38D-06
 ErrMax= 1.38D-06  0.00D+00 EMaxC= 1.00D-01 BMatC= 4.32D-10 BMatP= 2.15D-09
 IDIUse=1 WtCom= 1.00D+00 WtEn= 0.00D+00
 Coeff-Com:  0.716D-04-0.105D-02-0.122D-02-0.924D-03 0.476D-02 0.235D-01
 Coeff-Com:  0.588D-01 0.335D+00 0.581D+00
 Coeff:      0.716D-04-0.105D-02-0.122D-02-0.924D-03 0.476D-02 0.235D-01
 Coeff:      0.588D-01 0.335D+00 0.581D+00
 Gap=     0.129 Goal=   None    Shift=    0.000
 RMSDP=9.50D-08 MaxDP=4.26D-06 DE=-1.49D-09 OVMax= 5.37D-06

 Cycle  10  Pass 1  IDiag  1:
 RMSU=  4.60D-08    CP:  1.00D+00  1.07D+00  4.96D-01  5.60D-01  6.96D-01
                    CP:  6.49D-01  5.47D-01  7.75D-01  7.34D-01
 E= -3262.53024266740     Delta-E=       -0.000000000278 Rises=F Damp=F
 DIIS: error= 6.19D-07 at cycle  10 NSaved=  10.
 NSaved=10 IEnMin=10 EnMin= -3262.53024266740     IErMin=10 ErrMin= 6.19D-07
 ErrMax= 6.19D-07  0.00D+00 EMaxC= 1.00D-01 BMatC= 7.70D-11 BMatP= 4.32D-10
 IDIUse=1 WtCom= 1.00D+00 WtEn= 0.00D+00
 Coeff-Com:  0.565D-05 0.355D-04-0.370D-03-0.808D-03-0.412D-02-0.494D-02
 Coeff-Com:  0.738D-02 0.133D+00 0.368D+00 0.502D+00
 Coeff:      0.565D-05 0.355D-04-0.370D-03-0.808D-03-0.412D-02-0.494D-02
 Coeff:      0.738D-02 0.133D+00 0.368D+00 0.502D+00
 Gap=     0.129 Goal=   None    Shift=    0.000
 RMSDP=2.96D-08 MaxDP=7.61D-07 DE=-2.78D-10 OVMax= 3.59D-06

 Cycle  11  Pass 1  IDiag  1:
 RMSU=  1.44D-08    CP:  1.00D+00  1.07D+00  4.96D-01  5.60D-01  6.96D-01
                    CP:  6.48D-01  5.53D-01  7.77D-01  7.84D-01  5.09D-01
 E= -3262.53024266748     Delta-E=       -0.000000000076 Rises=F Damp=F
 DIIS: error= 1.49D-07 at cycle  11 NSaved=  11.
 NSaved=11 IEnMin=11 EnMin= -3262.53024266748     IErMin=11 ErrMin= 1.49D-07
 ErrMax= 1.49D-07  0.00D+00 EMaxC= 1.00D-01 BMatC= 6.31D-12 BMatP= 7.70D-11
 IDIUse=1 WtCom= 1.00D+00 WtEn= 0.00D+00
 Coeff-Com: -0.316D-05 0.118D-03-0.972D-04-0.379D-03-0.284D-02-0.497D-02
 Coeff-Com: -0.687D-03 0.486D-01 0.163D+00 0.294D+00 0.503D+00
 Coeff:     -0.316D-05 0.118D-03-0.972D-04-0.379D-03-0.284D-02-0.497D-02
 Coeff:     -0.687D-03 0.486D-01 0.163D+00 0.294D+00 0.503D+00
 Gap=     0.129 Goal=   None    Shift=    0.000
 RMSDP=8.42D-09 MaxDP=2.26D-07 DE=-7.64D-11 OVMax= 1.22D-06

 Error on total polarization charges =  0.01378
 SCF Done:  E(RB3LYP) =  -3262.53024267     A.U. after   11 cycles
            NFock= 11  Conv=0.84D-08     -V/T= 2.0018
 KE= 3.256611806882D+03 PE=-1.050450799886D+04 EE= 2.611172302207D+03
 Leave Link  502 at Sun Jan 12 17:00:09 2020, MaxMem=   134217728 cpu:       765.0
 (Enter E:\Gaussian\G09W\l801.exe)
 DoSCS=F DFT=T ScalE2(SS,OS)=  1.000000  1.000000
 ExpMin= 1.03D-01 ExpMax= 4.40D+05 ExpMxC= 1.51D+04 IAcc=3 IRadAn=         5 AccDes= 0.00D+00
 HarFok:  IExCor=  205 AccDes= 0.00D+00 IRadAn=         5 IDoV=-2 UseB2=F ITyADJ=14
 ICtDFT= 12500011 ScaDFX=  1.000000  1.000000  1.000000  1.000000
 Largest valence mixing into a core orbital is  2.38D-04
 Largest core mixing into a valence orbital is  1.99D-05
 Range of M.O.s used for correlation:    31   353
 NBasis=   353 NAE=    71 NBE=    71 NFC=    30 NFV=     0
 NROrb=    323 NOA=    41 NOB=    41 NVA=   282 NVB=   282

 **** Warning!!: The largest alpha MO coefficient is  0.24224780D+02

 Leave Link  801 at Sun Jan 12 17:00:11 2020, MaxMem=   134217728 cpu:         2.0
 (Enter E:\Gaussian\G09W\l914.exe)
 RHF ground state
 MDV=   134217728 DFT=T DoStab=F Mixed=T DoRPA=T DoScal=F NonHer=T
 NEqPCM:  Using equilibrium solvation (IEInf=0, Eps=  35.6880, EpsInf=   1.8069)
 Making orbital integer symmetry assigments:
 Orbital symmetries:
       Occupied  (A) (A) (A) (A) (A) (A) (A) (A) (A) (A) (A) (A)
                 (A) (A) (A) (A) (A) (A) (A) (A) (A) (A) (A) (A)
                 (A) (A) (A) (A) (A) (A) (A) (A) (A) (A) (A) (A)
                 (A) (A) (A) (A) (A) (A) (A) (A) (A) (A) (A) (A)
                 (A) (A) (A) (A) (A) (A) (A) (A) (A) (A) (A) (A)
                 (A) (A) (A) (A) (A) (A) (A) (A) (A) (A) (A)
       Virtual   (A) (A) (A) (A) (A) (A) (A) (A) (A) (A) (A) (A)
                 (A) (A) (A) (A) (A) (A) (A) (A) (A) (A) (A) (A)
                 (A) (A) (A) (A) (A) (A) (A) (A) (A) (A) (A) (A)
                 (A) (A) (A) (A) (A) (A) (A) (A) (A) (A) (A) (A)
                 (A) (A) (A) (A) (A) (A) (A) (A) (A) (A) (A) (A)
                 (A) (A) (A) (A) (A) (A) (A) (A) (A) (A) (A) (A)
                 (A) (A) (A) (A) (A) (A) (A) (A) (A) (A) (A) (A)
                 (A) (A) (A) (A) (A) (A) (A) (A) (A) (A) (A) (A)
                 (A) (A) (A) (A) (A) (A) (A) (A) (A) (A) (A) (A)
                 (A) (A) (A) (A) (A) (A) (A) (A) (A) (A) (A) (A)
                 (A) (A) (A) (A) (A) (A) (A) (A) (A) (A) (A) (A)
                 (A) (A) (A) (A) (A) (A) (A) (A) (A) (A) (A) (A)
                 (A) (A) (A) (A) (A) (A) (A) (A) (A) (A) (A) (A)
                 (A) (A) (A) (A) (A) (A) (A) (A) (A) (A) (A) (A)
                 (A) (A) (A) (A) (A) (A) (A) (A) (A) (A) (A) (A)
                 (A) (A) (A) (A) (A) (A) (A) (A) (A) (A) (A) (A)
                 (A) (A) (A) (A) (A) (A) (A) (A) (A) (A) (A) (A)
                 (A) (A) (A) (A) (A) (A) (A) (A) (A) (A) (A) (A)
                 (A) (A) (A) (A) (A) (A) (A) (A) (A) (A) (A) (A)
                 (A) (A) (A) (A) (A) (A) (A) (A) (A) (A) (A) (A)
                 (A) (A) (A) (A) (A) (A) (A) (A) (A) (A) (A) (A)
                 (A) (A) (A) (A) (A) (A) (A) (A) (A) (A) (A) (A)
                 (A) (A) (A) (A) (A) (A) (A) (A) (A) (A) (A) (A)
                 (A) (A) (A) (A) (A) (A)
 Generating guess from densities on rwf.
 Convergence on wavefunction:    0.000001000000000
 Davidson Disk Diagonalization:  ConvIn= 1.00D-06 SkipCon=T Conv= 1.00D-06.
 Max sub-space:   200 roots to seek:     5 dimension of matrix:        23124
 Iteration     1 Dimension    10 NMult     0 NNew     10
 CISAX will form    10 AO SS matrices at one time.
 NMat=    10 NSing=     0 JSym2X= 0.
 FoFJK:  IHMeth= 1 ICntrl=       0 DoSepK=F KAlg= 0 I1Cent=   0 FoldK=F
 IRaf=         0 NMat=  20 IRICut=       1 DoRegI=T DoRafI=F ISym2E= 0.
 FoFCou: FMM=F IPFlag=           0 FMFlag=      100000 FMFlg1=           0
         NFxFlg=           0 DoJE=F BraDBF=F KetDBF=F FulRan=T
         wScrn=  0.000000 ICntrl=       0 IOpCl=  0 I1Cent=           0 NGrid=           0
         NMat0=   20 NMatS0=      0 NMatT0=   10 NMatD0=   20 NMtDS0=    0 NMtDT0=    0
 Symmetry not used in FoFCou.
 Excitation Energies [eV] at current iteration:
 Root      1 :     2.114891318918515
 Root      2 :     2.335674684659368
 Root      3 :     2.571112467081762
 Root      4 :     2.614322329151562
 Root      5 :     2.800021457526306
 Iteration     2 Dimension    20 NMult    10 NNew     10
 CISAX will form    10 AO SS matrices at one time.
 NMat=    10 NSing=     0 JSym2X= 0.
 Root      1 not converged, maximum delta is    0.008781296836247
 Root      2 not converged, maximum delta is    0.008492798274542
 Root      3 not converged, maximum delta is    0.032556855534941
 Root      4 not converged, maximum delta is    0.041999397100043
 Root      5 not converged, maximum delta is    0.026487816678504
 Excitation Energies [eV] at current iteration:
 Root      1 :     2.104886687141887   Change is   -0.010004631776628
 Root      2 :     2.330072507694284   Change is   -0.005602176965085
 Root      3 :     2.560791326693789   Change is   -0.010321140387973
 Root      4 :     2.587611899853437   Change is   -0.026710429298126
 Root      5 :     2.778107624939969   Change is   -0.021913832586337
 Iteration     3 Dimension    30 NMult    20 NNew     10
 CISAX will form    10 AO SS matrices at one time.
 NMat=    10 NSing=     0 JSym2X= 0.
 Root      1 not converged, maximum delta is    0.003672953436693
 Root      2 not converged, maximum delta is    0.005472035613655
 Root      3 not converged, maximum delta is    0.021918057666486
 Root      4 not converged, maximum delta is    0.001915334312891
 Root      5 not converged, maximum delta is    0.002647193897352
 Excitation Energies [eV] at current iteration:
 Root      1 :     2.104693368688131   Change is   -0.000193318453755
 Root      2 :     2.329931626196741   Change is   -0.000140881497542
 Root      3 :     2.559579394937472   Change is   -0.001211931756317
 Root      4 :     2.587197963095446   Change is   -0.000413936757991
 Root      5 :     2.777640504006416   Change is   -0.000467120933553
 Iteration     4 Dimension    40 NMult    30 NNew     10
 CISAX will form    10 AO SS matrices at one time.
 NMat=    10 NSing=     0 JSym2X= 0.
 Root      1 not converged, maximum delta is    0.000412292570530
 Root      2 not converged, maximum delta is    0.000818701149965
 Root      3 not converged, maximum delta is    0.004677750693298
 Root      4 not converged, maximum delta is    0.000510733405702
 Root      5 not converged, maximum delta is    0.000472111970055
 Excitation Energies [eV] at current iteration:
 Root      1 :     2.104685411321099   Change is   -0.000007957367033
 Root      2 :     2.329920624062243   Change is   -0.000011002134498
 Root      3 :     2.559412052585867   Change is   -0.000167342351605
 Root      4 :     2.587180265652801   Change is   -0.000017697442645
 Root      5 :     2.777623090398194   Change is   -0.000017413608222
 Iteration     5 Dimension    50 NMult    40 NNew     10
 CISAX will form    10 AO SS matrices at one time.
 NMat=    10 NSing=     0 JSym2X= 0.
 Root      1 not converged, maximum delta is    0.000068100391971
 Root      2 not converged, maximum delta is    0.000057452817292
 Root      3 not converged, maximum delta is    0.000286033847899
 Root      4 not converged, maximum delta is    0.000116472431846
 Root      5 not converged, maximum delta is    0.000138072558492
 Excitation Energies [eV] at current iteration:
 Root      1 :     2.104685072289010   Change is   -0.000000339032088
 Root      2 :     2.329920210184000   Change is   -0.000000413878242
 Root      3 :     2.559404354319701   Change is   -0.000007698266166
 Root      4 :     2.587178849566243   Change is   -0.000001416086558
 Root      5 :     2.777621955878364   Change is   -0.000001134519830
 Iteration     6 Dimension    60 NMult    50 NNew     10
 CISAX will form    10 AO SS matrices at one time.
 NMat=    10 NSing=     0 JSym2X= 0.
 Root      1 not converged, maximum delta is    0.000010024066475
 Root      2 not converged, maximum delta is    0.000011596929850
 Root      3 not converged, maximum delta is    0.000079971695939
 Root      4 not converged, maximum delta is    0.000052710370146
 Root      5 not converged, maximum delta is    0.000027865430974
 Excitation Energies [eV] at current iteration:
 Root      1 :     2.104685058463506   Change is   -0.000000013825505
 Root      2 :     2.329920188389761   Change is   -0.000000021794239
 Root      3 :     2.559403856020492   Change is   -0.000000498299209
 Root      4 :     2.587178714530438   Change is   -0.000000135035806
 Root      5 :     2.777621868955146   Change is   -0.000000086923219
 Iteration     7 Dimension    70 NMult    60 NNew     10
 CISAX will form    10 AO SS matrices at one time.
 NMat=    10 NSing=     0 JSym2X= 0.
 Root      1 not converged, maximum delta is    0.000001589972036
 Root      2 not converged, maximum delta is    0.000001780996827
 Root      3 not converged, maximum delta is    0.000017013696227
 Root      4 not converged, maximum delta is    0.000011008209097
 Root      5 not converged, maximum delta is    0.000009491179291
 Excitation Energies [eV] at current iteration:
 Root      1 :     2.104685057982607   Change is   -0.000000000480898
 Root      2 :     2.329920187477862   Change is   -0.000000000911900
 Root      3 :     2.559403827260306   Change is   -0.000000028760187
 Root      4 :     2.587178705842114   Change is   -0.000000008688323
 Root      5 :     2.777621862487481   Change is   -0.000000006467664
 Iteration     8 Dimension    80 NMult    70 NNew     10
 CISAX will form    10 AO SS matrices at one time.
 NMat=    10 NSing=     0 JSym2X= 0.
 Root      1 has converged.
 Root      2 has converged.
 Root      3 not converged, maximum delta is    0.000002548832891
 Root      4 not converged, maximum delta is    0.000001414464499
 Root      5 not converged, maximum delta is    0.000001225113539
 Excitation Energies [eV] at current iteration:
 Root      1 :     2.104685057967453   Change is   -0.000000000015155
 Root      2 :     2.329920187436263   Change is   -0.000000000041599
 Root      3 :     2.559403825742902   Change is   -0.000000001517403
 Root      4 :     2.587178705359166   Change is   -0.000000000482948
 Root      5 :     2.777621862111579   Change is   -0.000000000375903
 Iteration     9 Dimension    86 NMult    80 NNew      6
 CISAX will form     6 AO SS matrices at one time.
 NMat=     6 NSing=     0 JSym2X= 0.
 Root      1 has converged.
 Root      2 has converged.
 Root      3 has converged.
 Root      4 has converged.
 Root      5 has converged.
 Excitation Energies [eV] at current iteration:
 Root      1 :     2.104685057967569   Change is    0.000000000000117
 Root      2 :     2.329920187433581   Change is   -0.000000000002682
 Root      3 :     2.559403825681971   Change is   -0.000000000060931
 Root      4 :     2.587178705331204   Change is   -0.000000000027962
 Root      5 :     2.777621862091778   Change is   -0.000000000019800
 Convergence achieved on expansion vectors.
 ***********************************************************************
 Excited states from <AA,BB:AA,BB> singles matrix:
 ***********************************************************************
 
 1PDM for each excited state written to RWF  633
 Ground to excited state transition densities written to RWF  633
 Ground to excited state transition electric dipole moments (Au):
       state          X           Y           Z        Dip. S.      Osc.
         1         0.0000      0.0000      0.0000      0.0000      0.0000
         2         0.0000      0.0000      0.0000      0.0000      0.0000
         3         0.0000      0.0000      0.0000      0.0000      0.0000
         4         0.0000      0.0000      0.0000      0.0000      0.0000
         5         0.0000      0.0000      0.0000      0.0000      0.0000
 Ground to excited state transition velocity dipole moments (Au):
       state          X           Y           Z        Dip. S.      Osc.
         1         0.0000      0.0000      0.0000      0.0000      0.0000
         2         0.0000      0.0000      0.0000      0.0000      0.0000
         3         0.0000      0.0000      0.0000      0.0000      0.0000
         4         0.0000      0.0000      0.0000      0.0000      0.0000
         5         0.0000      0.0000      0.0000      0.0000      0.0000
 Ground to excited state transition magnetic dipole moments (Au):
       state          X           Y           Z
         1         0.0000      0.0000      0.0000
         2         0.0000      0.0000      0.0000
         3         0.0000      0.0000      0.0000
         4         0.0000      0.0000      0.0000
         5         0.0000      0.0000      0.0000
 Ground to excited state transition velocity quadrupole moments (Au):
       state          XX          YY          ZZ          XY          XZ          YZ
         1         0.0000      0.0000      0.0000      0.0000      0.0000      0.0000
         2         0.0000      0.0000      0.0000      0.0000      0.0000      0.0000
         3         0.0000      0.0000      0.0000      0.0000      0.0000      0.0000
         4         0.0000      0.0000      0.0000      0.0000      0.0000      0.0000
         5         0.0000      0.0000      0.0000      0.0000      0.0000      0.0000
 <0|del|b> * <b|rxdel|0> + <0|del|b> * <b|delr+rdel|0>
 Rotatory Strengths (R) in cgs (10**-40 erg-esu-cm/Gauss)
       state          XX          YY          ZZ    R(velocity)    E-M Angle
         1         0.0000      0.0000      0.0000      0.0000       90.00
         2         0.0000      0.0000      0.0000      0.0000       90.00
         3         0.0000      0.0000      0.0000      0.0000       90.00
         4         0.0000      0.0000      0.0000      0.0000       90.00
         5         0.0000      0.0000      0.0000      0.0000       90.00
 1/2[<0|r|b>*<b|rxdel|0> + (<0|rxdel|b>*<b|r|0>)*]
 Rotatory Strengths (R) in cgs (10**-40 erg-esu-cm/Gauss)
       state          XX          YY          ZZ     R(length)
         1         0.0000      0.0000      0.0000      0.0000
         2         0.0000      0.0000      0.0000      0.0000
         3         0.0000      0.0000      0.0000      0.0000
         4         0.0000      0.0000      0.0000      0.0000
         5         0.0000      0.0000      0.0000      0.0000
  1/2[<0|del|b>*<b|r|0> + (<0|r|b>*<b|del|0>)*] (Au)
       state          X           Y           Z        Dip. S.   Osc.(frdel)
         1         0.0000      0.0000      0.0000      0.0000      0.0000
         2         0.0000      0.0000      0.0000      0.0000      0.0000
         3         0.0000      0.0000      0.0000      0.0000      0.0000
         4         0.0000      0.0000      0.0000      0.0000      0.0000
         5         0.0000      0.0000      0.0000      0.0000      0.0000

 Excitation energies and oscillator strengths:
 
 Excited State   1:      Triplet-A      2.1047 eV  589.09 nm  f=0.0000  <S**2>=2.000
      64 -> 72        -0.14915
      66 -> 72        -0.11643
      68 -> 72         0.12702
      71 -> 72         0.63862
      71 -> 74         0.12625
 This state for optimization and/or second-order correction.
 Total Energy, E(TD-HF/TD-KS) =  -3262.45289691    
 Copying the excited state density for this state as the 1-particle RhoCI density.
 
 Excited State   2:      Triplet-A      2.3299 eV  532.14 nm  f=0.0000  <S**2>=2.000
      67 -> 73         0.10334
      69 -> 72        -0.23518
      70 -> 72         0.63585
 
 Excited State   3:      Triplet-A      2.5594 eV  484.43 nm  f=0.0000  <S**2>=2.000
      67 -> 72        -0.66166
      67 -> 73         0.11659
      68 -> 72         0.10431
      70 -> 73        -0.12562
 
 Excited State   4:      Triplet-A      2.5872 eV  479.23 nm  f=0.0000  <S**2>=2.000
      66 -> 72        -0.18256
      67 -> 72         0.11923
      68 -> 72         0.55290
      68 -> 74        -0.13101
      69 -> 72        -0.20115
      69 -> 73        -0.12553
      71 -> 72        -0.20392
 
 Excited State   5:      Triplet-A      2.7776 eV  446.37 nm  f=0.0000  <S**2>=2.000
      66 -> 72        -0.23909
      68 -> 72         0.12576
      69 -> 72         0.58111
      70 -> 72         0.24129
 SavETr:  write IOETrn=   770 NScale= 10 NData=  16 NLR=1 NState=    5 LETran=      96.
 The selected state is a triplet
 CISAX will form     1 AO SS matrices at one time.
 NMat=     1 NSing=     0 JSym2X= 0.
 CISAX will form     1 AO SS matrices at one time.
 NMat=     1 NSing=     0 JSym2X= 0.
 Leave Link  914 at Sun Jan 12 17:55:23 2020, MaxMem=   134217728 cpu:      3311.0
 (Enter E:\Gaussian\G09W\l1002.exe)
 Minotr:  Closed shell wavefunction.
          Computing CIS/TD-HF/TD-KS derivatives.
          Using Z-Vector for PSCF gradient.
          Skipping F1 and S1 gradient terms here.
          IDoAtm=111111111111111111111111
 NEqPCM:  Using equilibrium solvation (IEInf=0, Eps=  35.6880, EpsInf=   1.8069)
          Frozen-core window.
          Direct CPHF calculation.
          Differentiating once with respect to electric field.
                with respect to dipole field.
          Differentiating once with respect to nuclear coordinates.
          Requested convergence is 1.0D-10 RMS, and 1.0D-09 maximum.
          NewPWx=F KeepS1=T KeepF1=T KeepIn=T MapXYZ=F SortEE=F KeepMc=T.
          MDV=     134217394 using IRadAn=       0.
 Using stored XC quadrature information.
          Solving linear equations separately, MaxMat=       0.
          There are     1 degrees of freedom in the 1st order CPHF.  IDoFFX=0 NUNeed=     1.
 FoFJK:  IHMeth= 1 ICntrl=       0 DoSepK=F KAlg= 0 I1Cent=   0 FoldK=F
 IRaf= 800000000 NMat=   1 IRICut=       1 DoRegI=T DoRafI=F ISym2E=-1.
 FoFCou: FMM=F IPFlag=           0 FMFlag=      100000 FMFlg1=           0
         NFxFlg=           0 DoJE=F BraDBF=F KetDBF=F FulRan=T
         wScrn=  0.000000 ICntrl=       0 IOpCl=  0 I1Cent=           0 NGrid=           0
         NMat0=    1 NMatS0=      1 NMatT0=    0 NMatD0=    1 NMtDS0=    0 NMtDT0=    0
 Petite list used in FoFCou.
 LinEq1:  Iter=  0 NonCon=     1 RMS=3.49D-03 Max=1.87D-01 NDo=     1
 AX will form     1 AO Fock derivatives at one time.
 LinEq1:  Iter=  1 NonCon=     1 RMS=2.46D-03 Max=1.25D-01 NDo=     1
 LinEq1:  Iter=  2 NonCon=     1 RMS=1.93D-03 Max=8.77D-02 NDo=     1
 LinEq1:  Iter=  3 NonCon=     1 RMS=1.08D-03 Max=5.14D-02 NDo=     1
 LinEq1:  Iter=  4 NonCon=     1 RMS=7.17D-04 Max=3.59D-02 NDo=     1
 LinEq1:  Iter=  5 NonCon=     1 RMS=5.16D-04 Max=2.49D-02 NDo=     1
 LinEq1:  Iter=  6 NonCon=     1 RMS=3.20D-04 Max=1.30D-02 NDo=     1
 LinEq1:  Iter=  7 NonCon=     1 RMS=2.26D-04 Max=7.16D-03 NDo=     1
 LinEq1:  Iter=  8 NonCon=     1 RMS=1.43D-04 Max=6.23D-03 NDo=     1
 LinEq1:  Iter=  9 NonCon=     1 RMS=1.14D-04 Max=5.10D-03 NDo=     1
 LinEq1:  Iter= 10 NonCon=     1 RMS=7.52D-05 Max=2.54D-03 NDo=     1
 LinEq1:  Iter= 11 NonCon=     1 RMS=4.70D-05 Max=1.41D-03 NDo=     1
 LinEq1:  Iter= 12 NonCon=     1 RMS=2.17D-05 Max=7.28D-04 NDo=     1
 LinEq1:  Iter= 13 NonCon=     1 RMS=1.13D-05 Max=3.25D-04 NDo=     1
 LinEq1:  Iter= 14 NonCon=     1 RMS=4.70D-06 Max=1.38D-04 NDo=     1
 LinEq1:  Iter= 15 NonCon=     1 RMS=2.64D-06 Max=7.74D-05 NDo=     1
 LinEq1:  Iter= 16 NonCon=     1 RMS=8.91D-07 Max=2.51D-05 NDo=     1
 LinEq1:  Iter= 17 NonCon=     1 RMS=6.32D-07 Max=2.14D-05 NDo=     1
 LinEq1:  Iter= 18 NonCon=     1 RMS=3.42D-07 Max=1.45D-05 NDo=     1
 LinEq1:  Iter= 19 NonCon=     1 RMS=1.94D-07 Max=9.07D-06 NDo=     1
 LinEq1:  Iter= 20 NonCon=     1 RMS=8.02D-08 Max=3.35D-06 NDo=     1
 LinEq1:  Iter= 21 NonCon=     1 RMS=4.21D-08 Max=1.33D-06 NDo=     1
 LinEq1:  Iter= 22 NonCon=     1 RMS=1.81D-08 Max=6.48D-07 NDo=     1
 LinEq1:  Iter= 23 NonCon=     1 RMS=1.01D-08 Max=3.94D-07 NDo=     1
 LinEq1:  Iter= 24 NonCon=     1 RMS=5.09D-09 Max=2.15D-07 NDo=     1
 LinEq1:  Iter= 25 NonCon=     1 RMS=3.06D-09 Max=1.34D-07 NDo=     1
 LinEq1:  Iter= 26 NonCon=     1 RMS=1.38D-09 Max=3.55D-08 NDo=     1
 LinEq1:  Iter= 27 NonCon=     1 RMS=4.29D-10 Max=1.35D-08 NDo=     1
 LinEq1:  Iter= 28 NonCon=     1 RMS=2.12D-10 Max=5.16D-09 NDo=     1
 LinEq1:  Iter= 29 NonCon=     1 RMS=1.12D-10 Max=3.78D-09 NDo=     1
 LinEq1:  Iter= 30 NonCon=     0 RMS=2.36D-11 Max=7.96D-10 NDo=     1
 Linear equations converged to 1.000D-10 1.000D-09 after    30 iterations.
 End of Minotr F.D. properties file   721 does not exist.
 End of Minotr F.D. properties file   722 does not exist.
 End of Minotr F.D. properties file   788 does not exist.
 Leave Link 1002 at Sun Jan 12 18:31:52 2020, MaxMem=   134217728 cpu:      2188.0
 (Enter E:\Gaussian\G09W\l701.exe)
 Compute integral first derivatives.
 ... and contract with generalized density number  6.
 R6Disp: Adding Grimme-D3(BJ) dispersion energy 1st derivatives to the gradient.
 D1PCM: PCM CHGder 1st derivatives, ID1Alg=3 FixD1E=F DoIter=F DoCFld=F I1PDM=6.
 GePol: Maximum number of non-zero 1st derivatives   =     345
 Leave Link  701 at Sun Jan 12 18:32:43 2020, MaxMem=   134217728 cpu:        51.0
 (Enter E:\Gaussian\G09W\l702.exe)
 L702 exits ... SP integral derivatives will be done elsewhere.
 Leave Link  702 at Sun Jan 12 18:32:43 2020, MaxMem=   134217728 cpu:         0.0
 (Enter E:\Gaussian\G09W\l703.exe)
 Compute integral first derivatives, UseDBF=F ICtDFT=           0.
 Integral derivatives from FoFJK, PRISM(SPDF).
 Calling FoFJK, ICntrl=  10005127 FMM=F ISym2X=0 I1Cent= 0 IOpClX= 0 NMat=1 NMatS=1 NMatT=0.
 FoFJK:  IHMeth= 1 ICntrl=10005127 DoSepK=F KAlg= 0 I1Cent=   0 FoldK=F
 IRaf=         0 NMat=   1 IRICut=       1 DoRegI=T DoRafI=F ISym2E= 0.
 FoFCou: FMM=F IPFlag=           0 FMFlag=      100000 FMFlg1=         800
         NFxFlg=           0 DoJE=F BraDBF=F KetDBF=F FulRan=T
         wScrn=  0.000000 ICntrl=10005127 IOpCl=  0 I1Cent=           0 NGrid=           0
         NMat0=    1 NMatS0=      1 NMatT0=    0 NMatD0=    1 NMtDS0=    0 NMtDT0=    0
 Symmetry not used in FoFCou.
 Leave Link  703 at Sun Jan 12 18:36:33 2020, MaxMem=   134217728 cpu:       230.0
 (Enter E:\Gaussian\G09W\l716.exe)
 Dipole        =-1.36647481D+00 5.29943390D-01-2.60303188D-01
 ***** Axes restored to original set *****
 -------------------------------------------------------------------
 Center     Atomic                   Forces (Hartrees/Bohr)
 Number     Number              X              Y              Z
 -------------------------------------------------------------------
      1        6          -0.000027021   -0.000640057    0.000029567
      2        6           0.000485004    0.000304613    0.000007373
      3        6          -0.001318328    0.000262136    0.000341547
      4        6          -0.001157924    0.000461336   -0.002000588
      5        6           0.000065950    0.000112863   -0.000445799
      6        6          -0.000396084    0.000186756    0.000023359
      7        1          -0.000089065   -0.000083231   -0.000079654
      8        1           0.000151828   -0.000077313    0.000078698
      9        1           0.000188973   -0.000048681    0.000042209
     10        1          -0.000076919    0.000044763   -0.000055659
     11        6           0.001259760   -0.002400147    0.005863813
     12        8          -0.000405834    0.001566958   -0.001399662
     13        6           0.002535041   -0.002837182   -0.001171081
     14        6           0.000058792   -0.001506657   -0.002120182
     15        6          -0.000968459    0.003230666    0.000425552
     16        6           0.001237691    0.001620719   -0.000174420
     17        6           0.000366358   -0.000758601   -0.000213445
     18        6          -0.000324061   -0.002960342   -0.000044093
     19        1          -0.000195788   -0.000177509    0.000005927
     20        6          -0.001138641    0.002023979    0.000051438
     21        1          -0.000130758   -0.000086639    0.000037923
     22        1           0.000332443   -0.000354882   -0.000115437
     23       35           0.000340276    0.000297562    0.000027364
     24        8          -0.000793233    0.001818891    0.000885251
 -------------------------------------------------------------------
 Cartesian Forces:  Max     0.005863813 RMS     0.001256650
 Leave Link  716 at Sun Jan 12 18:36:33 2020, MaxMem=   134217728 cpu:         0.0
 (Enter E:\Gaussian\G09W\l103.exe)

 GradGradGradGradGradGradGradGradGradGradGradGradGradGradGradGradGradGrad
 Berny optimization.
 Using GEDIIS/GDIIS optimizer.
 FormGI is forming the generalized inverse of G from B-inverse, IUseBI=4.
 Internal  Forces:  Max     0.001875145 RMS     0.000495560
 Search for a local minimum.
 Step number   2 out of a maximum of  142
 All quantities printed in internal units (Hartrees-Bohrs-Radians)
 RMS Force = .49556D-03 SwitMx=.10000D-02 MixMth= 2
 Mixed Optimization -- En-DIIS/RFO-DIIS
 Update second derivatives using D2CorX and points    1    2
 DE= -8.04D-04 DEPred=-8.04D-04 R= 1.00D+00
 TightC=F SS=  1.41D+00  RLast= 2.69D-01 DXNew= 5.0454D-01 8.0670D-01
 Trust test= 1.00D+00 RLast= 2.69D-01 DXMaxT set to 5.05D-01
 ITU=  1  0
 Use linear search instead of GDIIS.
     Eigenvalues ---    0.00732   0.01383   0.01399   0.01522   0.01566
     Eigenvalues ---    0.01613   0.01690   0.01763   0.01788   0.01894
     Eigenvalues ---    0.02017   0.02068   0.02081   0.02113   0.02143
     Eigenvalues ---    0.02158   0.02175   0.02178   0.02220   0.02259
     Eigenvalues ---    0.02655   0.15722   0.15995   0.16000   0.16000
     Eigenvalues ---    0.16000   0.16000   0.16051   0.19526   0.21973
     Eigenvalues ---    0.22416   0.22560   0.23473   0.24046   0.24502
     Eigenvalues ---    0.24782   0.24911   0.24958   0.24983   0.24993
     Eigenvalues ---    0.25039   0.33129   0.34302   0.35386   0.35421
     Eigenvalues ---    0.35476   0.35588   0.35608   0.35706   0.35724
     Eigenvalues ---    0.35809   0.36440   0.37085   0.38212   0.38807
     Eigenvalues ---    0.39786   0.41306   0.43455   0.43729   0.44336
     Eigenvalues ---    0.46940   0.47279   0.48289   0.51831   0.77354
     Eigenvalues ---    0.83391
 RFO step:  Lambda=-9.63497488D-04 EMin= 7.32204012D-03
 Quartic linear search produced a step of  0.07330.
 Iteration  1 RMS(Cart)=  0.06595228 RMS(Int)=  0.00111364
 Iteration  2 RMS(Cart)=  0.00281934 RMS(Int)=  0.00039104
 Iteration  3 RMS(Cart)=  0.00000121 RMS(Int)=  0.00039104
 Iteration  4 RMS(Cart)=  0.00000000 RMS(Int)=  0.00039104
 ITry= 1 IFail=0 DXMaxC= 2.84D-01 DCOld= 1.00D+10 DXMaxT= 5.05D-01 DXLimC= 3.00D+00 Rises=F
 Variable       Old X    -DE/DX   Delta X   Delta X   Delta X     New X
                                 (Linear)    (Quad)   (Total)
    R1        2.61285   0.00055  -0.00019  -0.00032  -0.00043   2.61243
    R2        2.65463  -0.00030  -0.00014  -0.00188  -0.00187   2.65276
    R3        2.04896   0.00005  -0.00008  -0.00046  -0.00054   2.04842
    R4        2.65667  -0.00035  -0.00028  -0.00297  -0.00331   2.65336
    R5        2.04668  -0.00010  -0.00005  -0.00072  -0.00078   2.04590
    R6        2.67472  -0.00005  -0.00005  -0.00040  -0.00060   2.67412
    R7        2.76705   0.00071  -0.00011   0.00104   0.00103   2.76808
    R8        2.65690  -0.00006  -0.00063  -0.00500  -0.00571   2.65119
    R9        2.77982   0.00102   0.00027   0.00525   0.00543   2.78526
   R10        2.61128   0.00023  -0.00007  -0.00009  -0.00009   2.61118
   R11        2.04619   0.00008  -0.00007  -0.00028  -0.00035   2.04584
   R12        2.04877   0.00002  -0.00008  -0.00056  -0.00065   2.04813
   R13        2.34722  -0.00153  -0.00061  -0.00669  -0.00730   2.33991
   R14        2.76578   0.00038   0.00001   0.00132   0.00123   2.76701
   R15        2.70546  -0.00097  -0.00091  -0.00976  -0.01058   2.69488
   R16        2.39492   0.00188   0.00004   0.00282   0.00285   2.39777
   R17        2.77624   0.00165   0.00104   0.01302   0.01390   2.79014
   R18        2.60915   0.00042  -0.00058  -0.00351  -0.00416   2.60499
   R19        2.72721  -0.00047  -0.00025  -0.00308  -0.00339   2.72381
   R20        2.64715  -0.00118  -0.00022  -0.00456  -0.00470   2.64244
   R21        2.04442   0.00014  -0.00007  -0.00018  -0.00025   2.04417
   R22        2.56398  -0.00031  -0.00038  -0.00364  -0.00394   2.56004
   R23        2.04343  -0.00006  -0.00003  -0.00039  -0.00042   2.04301
   R24        2.73307   0.00156   0.00094   0.01126   0.01236   2.74543
   R25        3.54014   0.00023  -0.00032  -0.00122  -0.00154   3.53860
   R26        2.04425   0.00002  -0.00009  -0.00065  -0.00074   2.04351
    A1        2.09689   0.00012   0.00005   0.00093   0.00103   2.09792
    A2        2.09233   0.00004   0.00002   0.00056   0.00055   2.09288
    A3        2.09396  -0.00016  -0.00007  -0.00148  -0.00158   2.09238
    A4        2.10565  -0.00005  -0.00024  -0.00187  -0.00228   2.10337
    A5        2.10985   0.00016   0.00024   0.00276   0.00308   2.11292
    A6        2.06767  -0.00011   0.00000  -0.00085  -0.00078   2.06689
    A7        2.08104  -0.00003   0.00025   0.00174   0.00206   2.08310
    A8        2.07951   0.00025   0.00000   0.00024   0.00091   2.08042
    A9        2.12261  -0.00022  -0.00024  -0.00185  -0.00300   2.11960
   A10        2.08139   0.00011  -0.00011  -0.00065  -0.00057   2.08083
   A11        2.12709  -0.00005   0.00026   0.00319   0.00241   2.12949
   A12        2.07461  -0.00006  -0.00016  -0.00249  -0.00181   2.07280
   A13        2.10756   0.00004   0.00004   0.00081   0.00065   2.10820
   A14        2.06326  -0.00019  -0.00053  -0.00546  -0.00589   2.05737
   A15        2.11235   0.00015   0.00049   0.00466   0.00525   2.11760
   A16        2.09369  -0.00018   0.00000  -0.00084  -0.00081   2.09288
   A17        2.09456   0.00000  -0.00010  -0.00091  -0.00103   2.09354
   A18        2.09494   0.00018   0.00010   0.00175   0.00183   2.09677
   A19        2.13610  -0.00004   0.00000   0.00132   0.00026   2.13636
   A20        2.02906   0.00011  -0.00003   0.00453   0.00142   2.03047
   A21        2.11603   0.00005  -0.00012   0.00080  -0.00037   2.11566
   A22        2.05661   0.00081   0.00080   0.01054   0.01030   2.06691
   A23        2.13670  -0.00096  -0.00069  -0.00999  -0.01027   2.12643
   A24        2.08934   0.00015  -0.00015  -0.00117  -0.00093   2.08841
   A25        2.11299  -0.00008   0.00016   0.00218   0.00124   2.11423
   A26        2.09051   0.00018   0.00001  -0.00050   0.00029   2.09080
   A27        2.07950  -0.00011  -0.00018  -0.00200  -0.00201   2.07749
   A28        2.11047  -0.00041  -0.00036  -0.00371  -0.00496   2.10551
   A29        2.09340   0.00071   0.00003   0.00220   0.00294   2.09634
   A30        2.07925  -0.00030   0.00032   0.00136   0.00178   2.08103
   A31        2.09372   0.00032  -0.00002   0.00165   0.00144   2.09517
   A32        2.07802  -0.00040  -0.00051  -0.00639  -0.00680   2.07122
   A33        2.11142   0.00008   0.00053   0.00475   0.00538   2.11679
   A34        2.10774   0.00015  -0.00032  -0.00153  -0.00202   2.10572
   A35        2.05796  -0.00022   0.00006  -0.00092  -0.00078   2.05718
   A36        2.11723   0.00007   0.00025   0.00252   0.00285   2.12008
   A37        2.12798  -0.00031   0.00010  -0.00084  -0.00072   2.12726
   A38        2.08584   0.00083   0.00025   0.00557   0.00579   2.09163
   A39        2.06935  -0.00052  -0.00034  -0.00469  -0.00506   2.06429
   A40        2.07730   0.00025   0.00008   0.00143   0.00155   2.07885
   A41        2.11713   0.00038   0.00017   0.00421   0.00436   2.12150
   A42        2.08873  -0.00063  -0.00025  -0.00566  -0.00593   2.08279
    D1       -0.00734   0.00007  -0.00022   0.00115   0.00092  -0.00642
    D2        3.14139  -0.00008  -0.00019  -0.00611  -0.00635   3.13504
    D3        3.13022   0.00013  -0.00020   0.00479   0.00460   3.13482
    D4       -0.00424  -0.00001  -0.00016  -0.00247  -0.00266  -0.00690
    D5       -0.00658   0.00008  -0.00010   0.00339   0.00331  -0.00327
    D6        3.13686   0.00002   0.00019   0.00236   0.00256   3.13942
    D7        3.13905   0.00001  -0.00012  -0.00026  -0.00038   3.13867
    D8       -0.00070  -0.00005   0.00017  -0.00129  -0.00113  -0.00183
    D9        0.01856  -0.00021   0.00040  -0.00683  -0.00645   0.01211
   D10       -3.11469  -0.00032  -0.00076  -0.02550  -0.02636  -3.14105
   D11       -3.13000  -0.00006   0.00037   0.00028   0.00064  -3.12935
   D12        0.01994  -0.00018  -0.00079  -0.01840  -0.01926   0.00068
   D13       -0.01597   0.00020  -0.00026   0.00799   0.00777  -0.00819
   D14        3.11062   0.00040  -0.00147   0.01181   0.01046   3.12108
   D15        3.11707   0.00032   0.00093   0.02716   0.02816  -3.13796
   D16       -0.03953   0.00052  -0.00028   0.03097   0.03085  -0.00869
   D17        3.07534   0.00051   0.00442   0.07671   0.08129  -3.12655
   D18       -0.10135   0.00054   0.00219   0.05637   0.05865  -0.04270
   D19       -0.05770   0.00039   0.00322   0.05755   0.06093   0.00324
   D20        3.04879   0.00042   0.00100   0.03721   0.03829   3.08708
   D21        0.00233  -0.00006  -0.00005  -0.00362  -0.00370  -0.00136
   D22        3.13877   0.00002  -0.00057  -0.00321  -0.00377   3.13500
   D23       -3.12470  -0.00025   0.00112  -0.00737  -0.00633  -3.13104
   D24        0.01174  -0.00018   0.00060  -0.00696  -0.00641   0.00533
   D25       -3.08987   0.00062  -0.00792  -0.00406  -0.01204  -3.10191
   D26        0.11883  -0.00134  -0.00291  -0.11587  -0.11868   0.00014
   D27        0.03677   0.00082  -0.00913  -0.00024  -0.00935   0.02742
   D28       -3.03772  -0.00114  -0.00412  -0.11205  -0.11600   3.12947
   D29        0.00902  -0.00008   0.00023  -0.00211  -0.00187   0.00714
   D30       -3.13443  -0.00003  -0.00005  -0.00108  -0.00112  -3.13555
   D31       -3.12728  -0.00016   0.00077  -0.00250  -0.00176  -3.12904
   D32        0.01247  -0.00010   0.00048  -0.00147  -0.00101   0.01146
   D33       -0.10496   0.00125   0.00313   0.11555   0.11853   0.01357
   D34        3.01557   0.00107   0.00263   0.09764   0.10005   3.11563
   D35        3.10290  -0.00068   0.00808   0.00511   0.01322   3.11612
   D36       -0.05975  -0.00086   0.00758  -0.01280  -0.00526  -0.06500
   D37        0.07014  -0.00047  -0.00297  -0.05657  -0.05964   0.01050
   D38       -3.08360  -0.00060  -0.00337  -0.07034  -0.07387   3.12572
   D39       -3.03734  -0.00048  -0.00081  -0.03661  -0.03730  -3.07464
   D40        0.09210  -0.00060  -0.00121  -0.05038  -0.05153   0.04058
   D41        0.01263  -0.00036  -0.00019  -0.03167  -0.03195  -0.01932
   D42       -3.11691  -0.00024   0.00022  -0.01802  -0.01785  -3.13476
   D43       -3.10803  -0.00018   0.00032  -0.01389  -0.01364  -3.12167
   D44        0.04561  -0.00006   0.00072  -0.00023   0.00046   0.04607
   D45        3.13776   0.00018   0.00005   0.01517   0.01529  -3.13014
   D46        0.00344   0.00014   0.00006   0.01140   0.01152   0.01495
   D47       -0.02448   0.00000  -0.00044  -0.00235  -0.00276  -0.02725
   D48        3.12438  -0.00004  -0.00043  -0.00612  -0.00654   3.11784
   D49        3.10994   0.00021   0.00003   0.01743   0.01759   3.12753
   D50       -0.00762   0.00012   0.00043   0.01426   0.01480   0.00718
   D51       -0.04358   0.00009  -0.00037   0.00387   0.00351  -0.04008
   D52        3.12205  -0.00001   0.00003   0.00070   0.00072   3.12276
   D53        0.00058   0.00004  -0.00016   0.00174   0.00158   0.00216
   D54       -3.13436   0.00001  -0.00054  -0.00460  -0.00518  -3.13954
   D55        3.13476   0.00008  -0.00018   0.00553   0.00540   3.14016
   D56       -0.00018   0.00005  -0.00056  -0.00081  -0.00136  -0.00153
   D57        0.01990  -0.00004  -0.00023  -0.00457  -0.00478   0.01511
   D58       -3.11401  -0.00009   0.00042  -0.00263  -0.00221  -3.11622
   D59        3.13663   0.00005  -0.00065  -0.00135  -0.00195   3.13468
   D60        0.00272   0.00000   0.00000   0.00060   0.00063   0.00335
   D61        0.00218  -0.00001   0.00052   0.00189   0.00239   0.00458
   D62        3.13622   0.00005  -0.00012   0.00002  -0.00008   3.13614
   D63        3.13719   0.00002   0.00090   0.00821   0.00909  -3.13691
   D64       -0.01196   0.00008   0.00026   0.00635   0.00662  -0.00535
         Item               Value     Threshold  Converged?
 Maximum Force            0.001875     0.000450     NO 
 RMS     Force            0.000496     0.000300     NO 
 Maximum Displacement     0.283788     0.001800     NO 
 RMS     Displacement     0.065794     0.001200     NO 
 Predicted change in Energy=-5.292696D-04
 Lowest energy point so far.  Saving SCF results.
 GradGradGradGradGradGradGradGradGradGradGradGradGradGradGradGradGradGrad

 Leave Link  103 at Sun Jan 12 18:36:34 2020, MaxMem=   134217728 cpu:         1.0
 (Enter E:\Gaussian\G09W\l202.exe)
                          Input orientation:                          
 ---------------------------------------------------------------------
 Center     Atomic      Atomic             Coordinates (Angstroms)
 Number     Number       Type             X           Y           Z
 ---------------------------------------------------------------------
      1          6           0       -5.048274    0.077699    0.128082
      2          6           0       -4.011706    0.992147    0.107071
      3          6           0       -2.677213    0.556549    0.077511
      4          6           0       -2.400832   -0.831091    0.054434
      5          6           0       -3.467455   -1.742290    0.071636
      6          6           0       -4.775657   -1.299265    0.112249
      7          1           0       -6.074778    0.424746    0.157199
      8          1           0       -4.206155    2.057170    0.112812
      9          1           0       -3.231350   -2.798557    0.047091
     10          1           0       -5.591402   -2.012627    0.130870
     11          6           0       -1.023445   -1.352540   -0.002660
     12          8           0       -0.774564   -2.563915   -0.064605
     13          6           0       -1.601386    1.550434    0.056474
     14          6           0        0.048014   -0.355055   -0.034177
     15          6           0       -0.252612    1.089888    0.007683
     16          6           0        1.364227   -0.764126   -0.056832
     17          6           0        0.833633    2.036408   -0.034113
     18          6           0        2.391858    0.184036   -0.073104
     19          1           0        1.578113   -1.824469   -0.064942
     20          6           0        2.119492    1.611067   -0.064252
     21          1           0        0.587503    3.089038   -0.020179
     22          1           0        2.946088    2.308246   -0.072376
     23         35           0        4.177755   -0.377963   -0.107187
     24          8           0       -1.841351    2.795793    0.018187
 ---------------------------------------------------------------------
                    Distance matrix (angstroms):
                    1          2          3          4          5
     1  C    0.000000
     2  C    1.382437   0.000000
     3  C    2.419460   1.404097   0.000000
     4  C    2.800048   2.433492   1.415085   0.000000
     5  C    2.411334   2.788298   2.430880   1.402948   0.000000
     6  C    1.403780   2.415412   2.801557   2.421224   1.381779
     7  H    1.083975   2.140263   3.401054   3.884015   3.391386
     8  H    2.151210   1.082644   2.142609   3.406560   3.870822
     9  H    3.403030   3.870657   3.400696   2.135588   1.082612
    10  H    2.159735   3.394801   3.885358   3.403176   2.141901
    11  C    4.273397   3.799908   2.527053   1.473894   2.476007
    12  O    5.027907   4.811874   3.657536   2.379411   2.818739
    13  C    3.749014   2.474648   1.464804   2.512126   3.784768
    14  C    5.117202   4.279746   2.875823   2.496259   3.780759
    15  C    4.902794   3.761677   2.483549   2.882220   4.284919
    16  C    6.470164   5.657915   4.253877   3.767297   4.931374
    17  C    6.201587   4.958601   3.811625   4.323442   5.726176
    18  C    7.443610   6.456867   5.084971   4.900676   6.169540
    19  H    6.896702   6.261707   4.878251   4.102810   5.048085
    20  C    7.332467   6.164738   4.913296   5.139217   6.517472
    21  H    6.391567   5.056270   4.132967   4.929820   6.308157
    22  H    8.302128   7.083446   5.891724   6.201698   7.586903
    23  Br   9.240269   8.306044   6.920839   6.596154   7.768050
    24  O    4.205290   2.823380   2.390898   3.669961   4.820919
                    6          7          8          9         10
     6  C    0.000000
     7  H    2.159155   0.000000
     8  H    3.404407   2.481638   0.000000
     9  H    2.153371   4.299638   4.953044   0.000000
    10  H    1.083823   2.484982   4.299125   2.488885   0.000000
    11  C    3.754349   5.357263   4.665736   2.639752   4.617334
    12  O    4.199924   6.088806   5.758621   2.470492   4.852222
    13  C    4.266133   4.613952   2.654199   4.644415   5.349875
    14  C    4.917395   6.175217   4.892687   4.090420   5.880289
    15  C    5.116338   5.861944   4.071509   4.898411   6.176038
    16  C    6.165479   7.536446   6.246410   5.026832   7.069282
    17  C    6.527808   7.096492   5.041972   6.317244   7.596247
    18  C    7.321735   8.473187   6.861266   6.366379   8.282473
    19  H    6.377901   7.979665   6.968247   4.908394   7.174655
    20  C    7.486272   8.282660   6.343829   6.934601   8.522154
    21  H    6.930961   7.177458   4.905262   7.017973   8.014279
    22  H    8.524879   9.218259   7.159044   8.015887   9.570787
    23  Br   9.003362  10.287306   8.733168   7.796019   9.907836
    24  O    5.038700   4.854183   2.479277   5.764519   6.098891
                   11         12         13         14         15
    11  C    0.000000
    12  O    1.238228   0.000000
    13  C    2.960535   4.198352   0.000000
    14  C    1.464238   2.357249   2.521830   0.000000
    15  C    2.561199   3.691603   1.426070   1.476478   0.000000
    16  C    2.459703   2.795304   3.763627   1.378502   2.460833
    17  C    3.864543   4.873418   2.484693   2.517199   1.441380
    18  C    3.745707   4.192557   4.222539   2.405356   2.796483
    19  H    2.644749   2.466144   4.638311   2.121633   3.442427
    20  C    4.320279   5.079964   3.723330   2.856145   2.429749
    21  H    4.724730   5.814902   2.676643   3.486118   2.168680
    22  H    5.400315   6.130356   4.611985   3.936173   3.423812
    23  Br   5.292750   5.413470   6.094586   4.130450   4.668612
    24  O    4.228246   5.465469   1.268845   3.674273   2.331162
                   16         17         18         19         20
    16  C    0.000000
    17  C    2.850445   0.000000
    18  C    1.398321   2.420922   0.000000
    19  H    1.081730   3.932121   2.167104   0.000000
    20  C    2.492394   1.354716   1.452818   3.477931   0.000000
    21  H    3.930842   1.081113   3.420166   5.012571   2.129162
    22  H    3.455719   2.130217   2.195322   4.353245   1.081381
    23  Br   2.840352   4.125249   1.872547   2.975282   2.862609
    24  O    4.791073   2.781177   4.974904   5.748605   4.135051
                   21         22         23         24
    21  H    0.000000
    22  H    2.485012   0.000000
    23  Br   4.991751   2.955323   0.000000
    24  O    2.446794   4.813053   6.805739   0.000000
 Stoichiometry    C14H7BrO2
 Framework group  C1[X(C14H7BrO2)]
 Deg. of freedom    66
 Full point group                 C1      NOp   1
 RotChk:  IX=0 Diff= 2.42D-02
 Largest Abelian subgroup         C1      NOp   1
 Largest concise Abelian subgroup C1      NOp   1
                         Standard orientation:                         
 ---------------------------------------------------------------------
 Center     Atomic      Atomic             Coordinates (Angstroms)
 Number     Number       Type             X           Y           Z
 ---------------------------------------------------------------------
      1          6           0        5.052036    0.089444   -0.014186
      2          6           0        4.012661    1.000942   -0.012567
      3          6           0        2.679094    0.561574   -0.019224
      4          6           0        2.406185   -0.826930   -0.012704
      5          6           0        3.475501   -1.735124   -0.009746
      6          6           0        4.783039   -1.288322   -0.014740
      7          1           0        6.077953    0.439437   -0.015359
      8          1           0        4.204154    2.066496   -0.006044
      9          1           0        3.241874   -2.792167    0.001554
     10          1           0        5.601026   -1.999347   -0.018055
     11          6           0        1.029298   -1.352455    0.006498
     12          8           0        0.782412   -2.564899    0.053787
     13          6           0        1.600246    1.552401   -0.018001
     14          6           0       -0.045455   -0.358090    0.018331
     15          6           0        0.251996    1.087911   -0.005962
     16          6           0       -1.360651   -0.770835    0.005411
     17          6           0       -0.837649    2.031201    0.015423
     18          6           0       -2.391070    0.174433    0.002750
     19          1           0       -1.571647   -1.831778    0.000805
     20          6           0       -2.122641    1.602216    0.010625
     21          1           0       -0.594252    3.084559    0.014954
     22          1           0       -2.951169    2.297103    0.003065
     23         35           0       -4.175652   -0.392574   -0.011488
     24          8           0        1.835633    2.798097    0.034925
 ---------------------------------------------------------------------
 Rotational constants (GHZ):      0.9879494      0.1797215      0.1520694
 Leave Link  202 at Sun Jan 12 18:36:35 2020, MaxMem=   134217728 cpu:         0.0
 (Enter E:\Gaussian\G09W\l301.exe)
 Standard basis: 6-311G(d) (5D, 7F)
 Ernie: Thresh=  0.10000D-02 Tol=  0.10000D-05 Strict=F.
 There are   372 symmetry adapted cartesian basis functions of A   symmetry.
 There are   353 symmetry adapted basis functions of A   symmetry.
   353 basis functions,   637 primitive gaussians,   372 cartesian basis functions
    71 alpha electrons       71 beta electrons
       nuclear repulsion energy      1374.4376498696 Hartrees.
 IExCor=  402 DFT=T Ex+Corr=B3LYP ExCW=0 ScaHFX=  0.200000
 ScaDFX=  0.800000  0.720000  1.000000  0.810000 ScalE2=  1.000000  1.000000
 IRadAn=      0 IRanWt=     -1 IRanGd=            0 ICorTp=0 IEmpDi=141
 NAtoms=   24 NActive=   24 NUniq=   24 SFac= 1.00D+00 NAtFMM=   60 NAOKFM=F Big=F
 Integral buffers will be    262144 words long.
 Regular integral format.
 Two-electron integral symmetry is turned on.
 R6Disp:  Grimme-D3(BJ) Dispersion energy=       -0.0619982926 Hartrees.
 Nuclear repulsion after empirical dispersion term =     1374.3756515770 Hartrees.
 ------------------------------------------------------------------------------
 Polarizable Continuum Model (PCM)
 =================================
 Model                : PCM (using non-symmetric T matrix).
 Atomic radii         : UFF (Universal Force Field).
 Polarization charges : Total charges.
 Charge compensation  : None.
 Solution method      : On-the-fly selection.
 Cavity type          : Scaled VdW (van der Waals Surface) (Alpha=1.100).
 Cavity algorithm     : GePol (No added spheres)
                        Default sphere list used, NSphG=   24.
                        Lebedev-Laikov grids with approx.  5.0 points / Ang**2.
                        Smoothing algorithm: Karplus/York (Gamma=1.0000).
                        Polarization charges: spherical gaussians, with
                                              point-specific exponents (IZeta= 3).
                        Self-potential: point-specific (ISelfS= 7).
                        Self-field    : sphere-specific E.n sum rule (ISelfD= 2).
 1st derivatives      : Analytical E(r).r(x)/FMM algorithm (CHGder, D1EAlg=3).
                        Cavity 1st derivative terms included.
 Solvent              : Acetonitrile, Eps=  35.688000 Eps(inf)=   1.806874
 ------------------------------------------------------------------------------
 GePol: Number of generator spheres                  =      24
 GePol: Total number of spheres                      =      24
 GePol: Number of exposed spheres                    =      24 (100.00%)
 GePol: Number of points                             =    2161
 GePol: Average weight of points                     =       0.13
 GePol: Minimum weight of points                     =   0.12D-09
 GePol: Maximum weight of points                     =    0.20577
 GePol: Number of points with low weight             =     125
 GePol: Fraction of low-weight points (<1% of avg)   =       5.78%
 GePol: Cavity surface area                          =    279.491 Ang**2
 GePol: Cavity volume                                =    305.779 Ang**3
 Leave Link  301 at Sun Jan 12 18:36:35 2020, MaxMem=   134217728 cpu:         0.0
 (Enter E:\Gaussian\G09W\l302.exe)
 NPDir=0 NMtPBC=     1 NCelOv=     1 NCel=       1 NClECP=     1 NCelD=      1
         NCelK=      1 NCelE2=     1 NClLst=     1 CellRange=     0.0.
 One-electron integrals computed using PRISM.
 NBasis=   353 RedAO= T EigKep=  1.01D-04  NBF=   353
 NBsUse=   353 1.00D-06 EigRej= -1.00D+00 NBFU=   353
 Precomputing XC quadrature grid using
 IXCGrd= 4 IRadAn=           0 IRanWt=          -1 IRanGd=           0 AccXCQ= 0.00D+00.
 Generated NRdTot=       0 NPtTot=           0 NUsed=           0 NTot=          16
 NSgBfM=   363   363   363   363   363 MxSgAt=    24 MxSgA2=    24.
 Leave Link  302 at Sun Jan 12 18:36:38 2020, MaxMem=   134217728 cpu:         2.0
 (Enter E:\Gaussian\G09W\l308.exe)
 Leave Link  308 at Sun Jan 12 18:36:38 2020, MaxMem=   134217728 cpu:         0.0
 (Enter E:\Gaussian\G09W\l303.exe)
 DipDrv:  MaxL=1.
 Leave Link  303 at Sun Jan 12 18:36:39 2020, MaxMem=   134217728 cpu:         0.0
 (Enter E:\Gaussian\G09W\l401.exe)
 Initial guess from the checkpoint file:  "E:\Gaussian file\error\2-BrAQ excited triplet state opt.chk"
 B after Tr=     0.000000    0.000000    0.000000
         Rot=    1.000000   -0.000130    0.000006   -0.000207 Ang=  -0.03 deg.
 Guess basis will be translated and rotated to current coordinates.
 JPrj=2 DoOrth=T DoCkMO=T.
 Generating alternative initial guess.
 ExpMin= 1.03D-01 ExpMax= 4.40D+05 ExpMxC= 1.51D+04 IAcc=2 IRadAn=         4 AccDes= 0.00D+00
 Harris functional with IExCor=  402 and IRadAn=       4 diagonalized for initial guess.
 HarFok:  IExCor=  402 AccDes= 0.00D+00 IRadAn=         4 IDoV= 1 UseB2=F ITyADJ=14
 ICtDFT=  3500011 ScaDFX=  1.000000  1.000000  1.000000  1.000000
 FoFCou: FMM=F IPFlag=           0 FMFlag=      100000 FMFlg1=           0
         NFxFlg=           0 DoJE=T BraDBF=F KetDBF=T FulRan=T
         wScrn=  0.000000 ICntrl=     500 IOpCl=  0 I1Cent=   200000004 NGrid=           0
         NMat0=    1 NMatS0=      1 NMatT0=    0 NMatD0=    1 NMtDS0=    0 NMtDT0=    0
 Petite list used in FoFCou.
 Harris En= -3262.59106462698    
 Leave Link  401 at Sun Jan 12 18:36:57 2020, MaxMem=   134217728 cpu:        18.0
 (Enter E:\Gaussian\G09W\l502.exe)
 Closed shell SCF:
 Using DIIS extrapolation, IDIIS=  1040.
 Integral symmetry usage will be decided dynamically.
 IVT=      438130 IEndB=      438130 NGot=   134217728 MDV=   133934995
 LenX=   133934995 LenY=   133796170
 Requested convergence on RMS density matrix=1.00D-08 within 128 cycles.
 Requested convergence on MAX density matrix=1.00D-06.
 Requested convergence on             energy=1.00D-06.
 No special actions if energy rises.
 Fock matrices will be formed incrementally for  20 cycles.

 Cycle   1  Pass 1  IDiag  1:
 FoFJK:  IHMeth= 1 ICntrl=       0 DoSepK=F KAlg= 0 I1Cent=   0 FoldK=F
 IRaf= 780000000 NMat=   1 IRICut=       1 DoRegI=T DoRafI=F ISym2E= 0.
 FoFCou: FMM=F IPFlag=           0 FMFlag=      100000 FMFlg1=           0
         NFxFlg=           0 DoJE=F BraDBF=F KetDBF=F FulRan=T
         wScrn=  0.000000 ICntrl=       0 IOpCl=  0 I1Cent=           0 NGrid=           0
         NMat0=    1 NMatS0=      1 NMatT0=    0 NMatD0=    1 NMtDS0=    0 NMtDT0=    0
 Symmetry not used in FoFCou.
 Inv3:  Mode=1 IEnd=    14009763.
 Iteration    1 A*A^-1 deviation from unit magnitude is 4.00D-15 for    835.
 Iteration    1 A*A^-1 deviation from orthogonality  is 2.64D-15 for   1451   1265.
 Iteration    1 A^-1*A deviation from unit magnitude is 3.11D-15 for   1601.
 Iteration    1 A^-1*A deviation from orthogonality  is 3.13D-12 for   1511   1237.
 E= -3262.51594637225    
 DIIS: error= 4.90D-03 at cycle   1 NSaved=   1.
 NSaved= 1 IEnMin= 1 EnMin= -3262.51594637225     IErMin= 1 ErrMin= 4.90D-03
 ErrMax= 4.90D-03  0.00D+00 EMaxC= 1.00D-01 BMatC= 6.59D-03 BMatP= 6.59D-03
 IDIUse=3 WtCom= 9.51D-01 WtEn= 4.90D-02
 Coeff-Com:  0.100D+01
 Coeff-En:   0.100D+01
 Coeff:      0.100D+01
 Gap=     0.806 Goal=   None    Shift=    0.000
 GapD=    0.806 DampG=2.000 DampE=1.000 DampFc=2.0000 IDamp=-1.
 RMSDP=6.86D-04 MaxDP=2.77D-02              OVMax= 2.86D-02

 Cycle   2  Pass 1  IDiag  1:
 RMSU=  6.86D-04    CP:  9.99D-01
 E= -3262.52910484771     Delta-E=       -0.013158475461 Rises=F Damp=F
 DIIS: error= 6.88D-04 at cycle   2 NSaved=   2.
 NSaved= 2 IEnMin= 2 EnMin= -3262.52910484771     IErMin= 2 ErrMin= 6.88D-04
 ErrMax= 6.88D-04  0.00D+00 EMaxC= 1.00D-01 BMatC= 1.42D-04 BMatP= 6.59D-03
 IDIUse=3 WtCom= 9.93D-01 WtEn= 6.88D-03
 Coeff-Com: -0.505D-01 0.105D+01
 Coeff-En:   0.000D+00 0.100D+01
 Coeff:     -0.502D-01 0.105D+01
 Gap=     0.129 Goal=   None    Shift=    0.000
 RMSDP=1.30D-04 MaxDP=5.77D-03 DE=-1.32D-02 OVMax= 7.90D-03

 Cycle   3  Pass 1  IDiag  1:
 RMSU=  1.28D-04    CP:  9.99D-01  1.03D+00
 E= -3262.52907376857     Delta-E=        0.000031079137 Rises=F Damp=F
 DIIS: error= 1.66D-03 at cycle   3 NSaved=   3.
 NSaved= 3 IEnMin= 2 EnMin= -3262.52910484771     IErMin= 2 ErrMin= 6.88D-04
 ErrMax= 1.66D-03  0.00D+00 EMaxC= 1.00D-01 BMatC= 3.83D-04 BMatP= 1.42D-04
 IDIUse=3 WtCom= 1.97D-01 WtEn= 8.03D-01
 Coeff-Com: -0.489D-01 0.692D+00 0.357D+00
 Coeff-En:   0.000D+00 0.541D+00 0.459D+00
 Coeff:     -0.963D-02 0.571D+00 0.439D+00
 Gap=     0.129 Goal=   None    Shift=    0.000
 RMSDP=1.23D-04 MaxDP=5.37D-03 DE= 3.11D-05 OVMax= 7.15D-03

 Cycle   4  Pass 1  IDiag  1:
 RMSU=  3.80D-05    CP:  9.99D-01  1.05D+00  9.17D-02
 E= -3262.52930311465     Delta-E=       -0.000229346072 Rises=F Damp=F
 DIIS: error= 7.88D-04 at cycle   4 NSaved=   4.
 NSaved= 4 IEnMin= 4 EnMin= -3262.52930311465     IErMin= 2 ErrMin= 6.88D-04
 ErrMax= 7.88D-04  0.00D+00 EMaxC= 1.00D-01 BMatC= 8.46D-05 BMatP= 1.42D-04
 IDIUse=3 WtCom= 9.92D-01 WtEn= 7.88D-03
 Coeff-Com: -0.135D-01 0.132D+00 0.319D+00 0.562D+00
 Coeff-En:   0.000D+00 0.000D+00 0.228D+00 0.772D+00
 Coeff:     -0.134D-01 0.131D+00 0.318D+00 0.564D+00
 Gap=     0.129 Goal=   None    Shift=    0.000
 RMSDP=3.97D-05 MaxDP=1.49D-03 DE=-2.29D-04 OVMax= 1.94D-03

 Cycle   5  Pass 1  IDiag  1:
 RMSU=  1.02D-05    CP:  9.99D-01  1.05D+00  3.73D-01  6.47D-01
 E= -3262.52936455544     Delta-E=       -0.000061440798 Rises=F Damp=F
 DIIS: error= 7.20D-05 at cycle   5 NSaved=   5.
 NSaved= 5 IEnMin= 5 EnMin= -3262.52936455544     IErMin= 5 ErrMin= 7.20D-05
 ErrMax= 7.20D-05  0.00D+00 EMaxC= 1.00D-01 BMatC= 2.01D-06 BMatP= 8.46D-05
 IDIUse=1 WtCom= 1.00D+00 WtEn= 0.00D+00
 Coeff-Com: -0.215D-02-0.328D-02 0.135D+00 0.307D+00 0.563D+00
 Coeff:     -0.215D-02-0.328D-02 0.135D+00 0.307D+00 0.563D+00
 Gap=     0.129 Goal=   None    Shift=    0.000
 RMSDP=6.76D-06 MaxDP=2.40D-04 DE=-6.14D-05 OVMax= 4.24D-04

 Cycle   6  Pass 1  IDiag  1:
 RMSU=  3.37D-06    CP:  9.99D-01  1.05D+00  3.81D-01  7.19D-01  5.29D-01
 E= -3262.52936616477     Delta-E=       -0.000001609325 Rises=F Damp=F
 DIIS: error= 4.45D-05 at cycle   6 NSaved=   6.
 NSaved= 6 IEnMin= 6 EnMin= -3262.52936616477     IErMin= 6 ErrMin= 4.45D-05
 ErrMax= 4.45D-05  0.00D+00 EMaxC= 1.00D-01 BMatC= 3.42D-07 BMatP= 2.01D-06
 IDIUse=1 WtCom= 1.00D+00 WtEn= 0.00D+00
 Coeff-Com:  0.527D-03-0.211D-01 0.376D-01 0.109D+00 0.341D+00 0.533D+00
 Coeff:      0.527D-03-0.211D-01 0.376D-01 0.109D+00 0.341D+00 0.533D+00
 Gap=     0.129 Goal=   None    Shift=    0.000
 RMSDP=2.91D-06 MaxDP=1.09D-04 DE=-1.61D-06 OVMax= 1.91D-04

 Cycle   7  Pass 1  IDiag  1:
 RMSU=  1.13D-06    CP:  9.99D-01  1.05D+00  3.79D-01  7.08D-01  6.97D-01
                    CP:  4.44D-01
 E= -3262.52936645408     Delta-E=       -0.000000289308 Rises=F Damp=F
 DIIS: error= 1.50D-05 at cycle   7 NSaved=   7.
 NSaved= 7 IEnMin= 7 EnMin= -3262.52936645408     IErMin= 7 ErrMin= 1.50D-05
 ErrMax= 1.50D-05  0.00D+00 EMaxC= 1.00D-01 BMatC= 4.91D-08 BMatP= 3.42D-07
 IDIUse=1 WtCom= 1.00D+00 WtEn= 0.00D+00
 Coeff-Com:  0.532D-03-0.132D-01 0.102D-01 0.387D-01 0.161D+00 0.342D+00
 Coeff-Com:  0.461D+00
 Coeff:      0.532D-03-0.132D-01 0.102D-01 0.387D-01 0.161D+00 0.342D+00
 Coeff:      0.461D+00
 Gap=     0.129 Goal=   None    Shift=    0.000
 RMSDP=1.04D-06 MaxDP=4.16D-05 DE=-2.89D-07 OVMax= 5.72D-05

 Cycle   8  Pass 1  IDiag  1:
 RMSU=  3.66D-07    CP:  9.99D-01  1.05D+00  3.79D-01  7.17D-01  6.52D-01
                    CP:  5.71D-01  4.55D-01
 E= -3262.52936649221     Delta-E=       -0.000000038129 Rises=F Damp=F
 DIIS: error= 3.49D-06 at cycle   8 NSaved=   8.
 NSaved= 8 IEnMin= 8 EnMin= -3262.52936649221     IErMin= 8 ErrMin= 3.49D-06
 ErrMax= 3.49D-06  0.00D+00 EMaxC= 1.00D-01 BMatC= 2.76D-09 BMatP= 4.91D-08
 IDIUse=1 WtCom= 1.00D+00 WtEn= 0.00D+00
 Coeff-Com:  0.252D-03-0.554D-02 0.248D-02 0.124D-01 0.612D-01 0.147D+00
 Coeff-Com:  0.253D+00 0.529D+00
 Coeff:      0.252D-03-0.554D-02 0.248D-02 0.124D-01 0.612D-01 0.147D+00
 Coeff:      0.253D+00 0.529D+00
 Gap=     0.129 Goal=   None    Shift=    0.000
 RMSDP=2.85D-07 MaxDP=1.08D-05 DE=-3.81D-08 OVMax= 1.98D-05

 Cycle   9  Pass 1  IDiag  1:
 RMSU=  1.47D-07    CP:  9.99D-01  1.05D+00  3.79D-01  7.15D-01  6.62D-01
                    CP:  5.49D-01  5.77D-01  6.82D-01
 E= -3262.52936649411     Delta-E=       -0.000000001906 Rises=F Damp=F
 DIIS: error= 1.90D-06 at cycle   9 NSaved=   9.
 NSaved= 9 IEnMin= 9 EnMin= -3262.52936649411     IErMin= 9 ErrMin= 1.90D-06
 ErrMax= 1.90D-06  0.00D+00 EMaxC= 1.00D-01 BMatC= 5.68D-10 BMatP= 2.76D-09
 IDIUse=1 WtCom= 1.00D+00 WtEn= 0.00D+00
 Coeff-Com:  0.449D-04-0.645D-03-0.610D-03-0.432D-03 0.397D-02 0.206D-01
 Coeff-Com:  0.601D-01 0.333D+00 0.584D+00
 Coeff:      0.449D-04-0.645D-03-0.610D-03-0.432D-03 0.397D-02 0.206D-01
 Coeff:      0.601D-01 0.333D+00 0.584D+00
 Gap=     0.129 Goal=   None    Shift=    0.000
 RMSDP=9.42D-08 MaxDP=3.60D-06 DE=-1.91D-09 OVMax= 6.60D-06

 Cycle  10  Pass 1  IDiag  1:
 RMSU=  4.89D-08    CP:  9.99D-01  1.05D+00  3.79D-01  7.16D-01  6.60D-01
                    CP:  5.57D-01  5.55D-01  8.11D-01  7.12D-01
 E= -3262.52936649457     Delta-E=       -0.000000000457 Rises=F Damp=F
 DIIS: error= 6.37D-07 at cycle  10 NSaved=  10.
 NSaved=10 IEnMin=10 EnMin= -3262.52936649457     IErMin=10 ErrMin= 6.37D-07
 ErrMax= 6.37D-07  0.00D+00 EMaxC= 1.00D-01 BMatC= 7.21D-11 BMatP= 5.68D-10
 IDIUse=1 WtCom= 1.00D+00 WtEn= 0.00D+00
 Coeff-Com:  0.278D-05 0.155D-03-0.618D-03-0.149D-02-0.356D-02-0.173D-02
 Coeff-Com:  0.127D-01 0.149D+00 0.357D+00 0.489D+00
 Coeff:      0.278D-05 0.155D-03-0.618D-03-0.149D-02-0.356D-02-0.173D-02
 Coeff:      0.127D-01 0.149D+00 0.357D+00 0.489D+00
 Gap=     0.129 Goal=   None    Shift=    0.000
 RMSDP=2.72D-08 MaxDP=1.00D-06 DE=-4.57D-10 OVMax= 3.92D-06

 Cycle  11  Pass 1  IDiag  1:
 RMSU=  1.63D-08    CP:  9.99D-01  1.05D+00  3.79D-01  7.16D-01  6.60D-01
                    CP:  5.58D-01  5.59D-01  8.16D-01  7.76D-01  6.13D-01
 E= -3262.52936649456     Delta-E=        0.000000000007 Rises=F Damp=F
 DIIS: error= 1.50D-07 at cycle  11 NSaved=  11.
 NSaved=11 IEnMin=10 EnMin= -3262.52936649457     IErMin=11 ErrMin= 1.50D-07
 ErrMax= 1.50D-07  0.00D+00 EMaxC= 1.00D-01 BMatC= 5.85D-12 BMatP= 7.21D-11
 IDIUse=1 WtCom= 1.00D+00 WtEn= 0.00D+00
 Coeff-Com: -0.380D-05 0.165D-03-0.266D-03-0.778D-03-0.249D-02-0.352D-02
 Coeff-Com: -0.868D-04 0.428D-01 0.129D+00 0.271D+00 0.564D+00
 Coeff:     -0.380D-05 0.165D-03-0.266D-03-0.778D-03-0.249D-02-0.352D-02
 Coeff:     -0.868D-04 0.428D-01 0.129D+00 0.271D+00 0.564D+00
 Gap=     0.129 Goal=   None    Shift=    0.000
 RMSDP=8.73D-09 MaxDP=2.43D-07 DE= 7.28D-12 OVMax= 1.19D-06

 Error on total polarization charges =  0.01376
 SCF Done:  E(RB3LYP) =  -3262.52936649     A.U. after   11 cycles
            NFock= 11  Conv=0.87D-08     -V/T= 2.0018
 KE= 3.256638681197D+03 PE=-1.050488599983D+04 EE= 2.611342300558D+03
 Leave Link  502 at Sun Jan 12 18:48:07 2020, MaxMem=   134217728 cpu:       670.0
 (Enter E:\Gaussian\G09W\l801.exe)
 DoSCS=F DFT=T ScalE2(SS,OS)=  1.000000  1.000000
 ExpMin= 1.03D-01 ExpMax= 4.40D+05 ExpMxC= 1.51D+04 IAcc=3 IRadAn=         5 AccDes= 0.00D+00
 HarFok:  IExCor=  205 AccDes= 0.00D+00 IRadAn=         5 IDoV=-2 UseB2=F ITyADJ=14
 ICtDFT= 12500011 ScaDFX=  1.000000  1.000000  1.000000  1.000000
 Largest valence mixing into a core orbital is  2.38D-04
 Largest core mixing into a valence orbital is  1.99D-05
 Range of M.O.s used for correlation:    31   353
 NBasis=   353 NAE=    71 NBE=    71 NFC=    30 NFV=     0
 NROrb=    323 NOA=    41 NOB=    41 NVA=   282 NVB=   282

 **** Warning!!: The largest alpha MO coefficient is  0.25867613D+02

 Leave Link  801 at Sun Jan 12 18:48:10 2020, MaxMem=   134217728 cpu:         3.0
 (Enter E:\Gaussian\G09W\l914.exe)
 RHF ground state
 MDV=   134217728 DFT=T DoStab=F Mixed=T DoRPA=T DoScal=F NonHer=T
 NEqPCM:  Using equilibrium solvation (IEInf=0, Eps=  35.6880, EpsInf=   1.8069)
 Making orbital integer symmetry assigments:
 Orbital symmetries:
       Occupied  (A) (A) (A) (A) (A) (A) (A) (A) (A) (A) (A) (A)
                 (A) (A) (A) (A) (A) (A) (A) (A) (A) (A) (A) (A)
                 (A) (A) (A) (A) (A) (A) (A) (A) (A) (A) (A) (A)
                 (A) (A) (A) (A) (A) (A) (A) (A) (A) (A) (A) (A)
                 (A) (A) (A) (A) (A) (A) (A) (A) (A) (A) (A) (A)
                 (A) (A) (A) (A) (A) (A) (A) (A) (A) (A) (A)
       Virtual   (A) (A) (A) (A) (A) (A) (A) (A) (A) (A) (A) (A)
                 (A) (A) (A) (A) (A) (A) (A) (A) (A) (A) (A) (A)
                 (A) (A) (A) (A) (A) (A) (A) (A) (A) (A) (A) (A)
                 (A) (A) (A) (A) (A) (A) (A) (A) (A) (A) (A) (A)
                 (A) (A) (A) (A) (A) (A) (A) (A) (A) (A) (A) (A)
                 (A) (A) (A) (A) (A) (A) (A) (A) (A) (A) (A) (A)
                 (A) (A) (A) (A) (A) (A) (A) (A) (A) (A) (A) (A)
                 (A) (A) (A) (A) (A) (A) (A) (A) (A) (A) (A) (A)
                 (A) (A) (A) (A) (A) (A) (A) (A) (A) (A) (A) (A)
                 (A) (A) (A) (A) (A) (A) (A) (A) (A) (A) (A) (A)
                 (A) (A) (A) (A) (A) (A) (A) (A) (A) (A) (A) (A)
                 (A) (A) (A) (A) (A) (A) (A) (A) (A) (A) (A) (A)
                 (A) (A) (A) (A) (A) (A) (A) (A) (A) (A) (A) (A)
                 (A) (A) (A) (A) (A) (A) (A) (A) (A) (A) (A) (A)
                 (A) (A) (A) (A) (A) (A) (A) (A) (A) (A) (A) (A)
                 (A) (A) (A) (A) (A) (A) (A) (A) (A) (A) (A) (A)
                 (A) (A) (A) (A) (A) (A) (A) (A) (A) (A) (A) (A)
                 (A) (A) (A) (A) (A) (A) (A) (A) (A) (A) (A) (A)
                 (A) (A) (A) (A) (A) (A) (A) (A) (A) (A) (A) (A)
                 (A) (A) (A) (A) (A) (A) (A) (A) (A) (A) (A) (A)
                 (A) (A) (A) (A) (A) (A) (A) (A) (A) (A) (A) (A)
                 (A) (A) (A) (A) (A) (A) (A) (A) (A) (A) (A) (A)
                 (A) (A) (A) (A) (A) (A) (A) (A) (A) (A) (A) (A)
                 (A) (A) (A) (A) (A) (A)
 Generating guess from densities on rwf.
 Convergence on wavefunction:    0.000001000000000
 Davidson Disk Diagonalization:  ConvIn= 1.00D-06 SkipCon=T Conv= 1.00D-06.
 Max sub-space:   200 roots to seek:     5 dimension of matrix:        23124
 Iteration     1 Dimension    10 NMult     0 NNew     10
 CISAX will form    10 AO SS matrices at one time.
 NMat=    10 NSing=     0 JSym2X= 0.
 FoFJK:  IHMeth= 1 ICntrl=       0 DoSepK=F KAlg= 0 I1Cent=   0 FoldK=F
 IRaf=         0 NMat=  20 IRICut=       1 DoRegI=T DoRafI=F ISym2E= 0.
 FoFCou: FMM=F IPFlag=           0 FMFlag=      100000 FMFlg1=           0
         NFxFlg=           0 DoJE=F BraDBF=F KetDBF=F FulRan=T
         wScrn=  0.000000 ICntrl=       0 IOpCl=  0 I1Cent=           0 NGrid=           0
         NMat0=   20 NMatS0=      0 NMatT0=   10 NMatD0=   20 NMtDS0=    0 NMtDT0=    0
 Symmetry not used in FoFCou.
 Excitation Energies [eV] at current iteration:
 Root      1 :     2.095110042428309
 Root      2 :     2.323535814516190
 Root      3 :     2.579518941776942
 Root      4 :     2.645245651693405
 Root      5 :     2.817993526643640
 Iteration     2 Dimension    20 NMult    10 NNew     10
 CISAX will form    10 AO SS matrices at one time.
 NMat=    10 NSing=     0 JSym2X= 0.
 Root      1 not converged, maximum delta is    0.013484161759509
 Root      2 not converged, maximum delta is    0.006174763868206
 Root      3 not converged, maximum delta is    0.161440459939593
 Root      4 not converged, maximum delta is    0.189843982935815
 Root      5 not converged, maximum delta is    0.029028160659570
 Excitation Energies [eV] at current iteration:
 Root      1 :     2.075394577866686   Change is   -0.019715464561623
 Root      2 :     2.315050202314238   Change is   -0.008485612201952
 Root      3 :     2.564255785070855   Change is   -0.015263156706088
 Root      4 :     2.591276338816807   Change is   -0.053969312876598
 Root      5 :     2.784090791652542   Change is   -0.033902734991098
 Iteration     3 Dimension    30 NMult    20 NNew     10
 CISAX will form    10 AO SS matrices at one time.
 NMat=    10 NSing=     0 JSym2X= 0.
 Root      1 not converged, maximum delta is    0.002376982285578
 Root      2 not converged, maximum delta is    0.000967339604225
 Root      3 not converged, maximum delta is    0.002982457324482
 Root      4 not converged, maximum delta is    0.003192775479167
 Root      5 not converged, maximum delta is    0.001536274248598
 Excitation Energies [eV] at current iteration:
 Root      1 :     2.075140406893633   Change is   -0.000254170973053
 Root      2 :     2.314979256626721   Change is   -0.000070945687517
 Root      3 :     2.564040880818230   Change is   -0.000214904252625
 Root      4 :     2.590833332124106   Change is   -0.000443006692701
 Root      5 :     2.783792472826379   Change is   -0.000298318826163
 Iteration     4 Dimension    40 NMult    30 NNew     10
 CISAX will form    10 AO SS matrices at one time.
 NMat=    10 NSing=     0 JSym2X= 0.
 Root      1 not converged, maximum delta is    0.001086840395599
 Root      2 not converged, maximum delta is    0.000241824027049
 Root      3 not converged, maximum delta is    0.000425015311389
 Root      4 not converged, maximum delta is    0.000354673556537
 Root      5 not converged, maximum delta is    0.000655859822335
 Excitation Energies [eV] at current iteration:
 Root      1 :     2.075127476736427   Change is   -0.000012930157205
 Root      2 :     2.314975185655348   Change is   -0.000004070971374
 Root      3 :     2.564030605642959   Change is   -0.000010275175271
 Root      4 :     2.590816301164223   Change is   -0.000017030959883
 Root      5 :     2.783774635157324   Change is   -0.000017837669055
 Iteration     5 Dimension    50 NMult    40 NNew     10
 CISAX will form    10 AO SS matrices at one time.
 NMat=    10 NSing=     0 JSym2X= 0.
 Root      1 not converged, maximum delta is    0.000166714459728
 Root      2 not converged, maximum delta is    0.000087788205106
 Root      3 not converged, maximum delta is    0.000190467521833
 Root      4 not converged, maximum delta is    0.000114970902775
 Root      5 not converged, maximum delta is    0.000373234059179
 Excitation Energies [eV] at current iteration:
 Root      1 :     2.075126616078765   Change is   -0.000000860657663
 Root      2 :     2.314974888420437   Change is   -0.000000297234911
 Root      3 :     2.564029711334759   Change is   -0.000000894308200
 Root      4 :     2.590815267411924   Change is   -0.000001033752300
 Root      5 :     2.783772716082373   Change is   -0.000001919074951
 Iteration     6 Dimension    60 NMult    50 NNew     10
 CISAX will form    10 AO SS matrices at one time.
 NMat=    10 NSing=     0 JSym2X= 0.
 Root      1 not converged, maximum delta is    0.000013661698321
 Root      2 not converged, maximum delta is    0.000015602953855
 Root      3 not converged, maximum delta is    0.000037003387043
 Root      4 not converged, maximum delta is    0.000022726332294
 Root      5 not converged, maximum delta is    0.000126563127743
 Excitation Energies [eV] at current iteration:
 Root      1 :     2.075126581031464   Change is   -0.000000035047301
 Root      2 :     2.314974866120547   Change is   -0.000000022299890
 Root      3 :     2.564029651416920   Change is   -0.000000059917839
 Root      4 :     2.590815207879035   Change is   -0.000000059532888
 Root      5 :     2.783772536472173   Change is   -0.000000179610200
 Iteration     7 Dimension    70 NMult    60 NNew     10
 CISAX will form    10 AO SS matrices at one time.
 NMat=    10 NSing=     0 JSym2X= 0.
 Root      1 not converged, maximum delta is    0.000002764838862
 Root      2 not converged, maximum delta is    0.000002862764577
 Root      3 not converged, maximum delta is    0.000004166432050
 Root      4 not converged, maximum delta is    0.000003127316941
 Root      5 not converged, maximum delta is    0.000013502062954
 Excitation Energies [eV] at current iteration:
 Root      1 :     2.075126579671459   Change is   -0.000000001360005
 Root      2 :     2.314974865194025   Change is   -0.000000000926522
 Root      3 :     2.564029648363959   Change is   -0.000000003052961
 Root      4 :     2.590815204762003   Change is   -0.000000003117033
 Root      5 :     2.783772523303249   Change is   -0.000000013168924
 Iteration     8 Dimension    80 NMult    70 NNew     10
 CISAX will form    10 AO SS matrices at one time.
 NMat=    10 NSing=     0 JSym2X= 0.
 Root      1 has converged.
 Root      2 has converged.
 Root      3 has converged.
 Root      4 has converged.
 Root      5 not converged, maximum delta is    0.000002034495340
 Excitation Energies [eV] at current iteration:
 Root      1 :     2.075126579627684   Change is   -0.000000000043775
 Root      2 :     2.314974865157910   Change is   -0.000000000036115
 Root      3 :     2.564029648236417   Change is   -0.000000000127542
 Root      4 :     2.590815204637524   Change is   -0.000000000124478
 Root      5 :     2.783772522491974   Change is   -0.000000000811275
 Iteration     9 Dimension    82 NMult    80 NNew      2
 CISAX will form     2 AO SS matrices at one time.
 NMat=     2 NSing=     0 JSym2X= 0.
 Root      1 has converged.
 Root      2 has converged.
 Root      3 has converged.
 Root      4 has converged.
 Root      5 has converged.
 Excitation Energies [eV] at current iteration:
 Root      1 :     2.075126579625822   Change is   -0.000000000001862
 Root      2 :     2.314974865157554   Change is   -0.000000000000355
 Root      3 :     2.564029648235616   Change is   -0.000000000000801
 Root      4 :     2.590815204636636   Change is   -0.000000000000888
 Root      5 :     2.783772522446733   Change is   -0.000000000045241
 Convergence achieved on expansion vectors.
 ***********************************************************************
 Excited states from <AA,BB:AA,BB> singles matrix:
 ***********************************************************************
 
 1PDM for each excited state written to RWF  633
 Ground to excited state transition densities written to RWF  633
 Ground to excited state transition electric dipole moments (Au):
       state          X           Y           Z        Dip. S.      Osc.
         1         0.0000      0.0000      0.0000      0.0000      0.0000
         2         0.0000      0.0000      0.0000      0.0000      0.0000
         3         0.0000      0.0000      0.0000      0.0000      0.0000
         4         0.0000      0.0000      0.0000      0.0000      0.0000
         5         0.0000      0.0000      0.0000      0.0000      0.0000
 Ground to excited state transition velocity dipole moments (Au):
       state          X           Y           Z        Dip. S.      Osc.
         1         0.0000      0.0000      0.0000      0.0000      0.0000
         2         0.0000      0.0000      0.0000      0.0000      0.0000
         3         0.0000      0.0000      0.0000      0.0000      0.0000
         4         0.0000      0.0000      0.0000      0.0000      0.0000
         5         0.0000      0.0000      0.0000      0.0000      0.0000
 Ground to excited state transition magnetic dipole moments (Au):
       state          X           Y           Z
         1         0.0000      0.0000      0.0000
         2         0.0000      0.0000      0.0000
         3         0.0000      0.0000      0.0000
         4         0.0000      0.0000      0.0000
         5         0.0000      0.0000      0.0000
 Ground to excited state transition velocity quadrupole moments (Au):
       state          XX          YY          ZZ          XY          XZ          YZ
         1         0.0000      0.0000      0.0000      0.0000      0.0000      0.0000
         2         0.0000      0.0000      0.0000      0.0000      0.0000      0.0000
         3         0.0000      0.0000      0.0000      0.0000      0.0000      0.0000
         4         0.0000      0.0000      0.0000      0.0000      0.0000      0.0000
         5         0.0000      0.0000      0.0000      0.0000      0.0000      0.0000
 <0|del|b> * <b|rxdel|0> + <0|del|b> * <b|delr+rdel|0>
 Rotatory Strengths (R) in cgs (10**-40 erg-esu-cm/Gauss)
       state          XX          YY          ZZ    R(velocity)    E-M Angle
         1         0.0000      0.0000      0.0000      0.0000       90.00
         2         0.0000      0.0000      0.0000      0.0000       90.00
         3         0.0000      0.0000      0.0000      0.0000       90.00
         4         0.0000      0.0000      0.0000      0.0000       90.00
         5         0.0000      0.0000      0.0000      0.0000       90.00
 1/2[<0|r|b>*<b|rxdel|0> + (<0|rxdel|b>*<b|r|0>)*]
 Rotatory Strengths (R) in cgs (10**-40 erg-esu-cm/Gauss)
       state          XX          YY          ZZ     R(length)
         1         0.0000      0.0000      0.0000      0.0000
         2         0.0000      0.0000      0.0000      0.0000
         3         0.0000      0.0000      0.0000      0.0000
         4         0.0000      0.0000      0.0000      0.0000
         5         0.0000      0.0000      0.0000      0.0000
  1/2[<0|del|b>*<b|r|0> + (<0|r|b>*<b|del|0>)*] (Au)
       state          X           Y           Z        Dip. S.   Osc.(frdel)
         1         0.0000      0.0000      0.0000      0.0000      0.0000
         2         0.0000      0.0000      0.0000      0.0000      0.0000
         3         0.0000      0.0000      0.0000      0.0000      0.0000
         4         0.0000      0.0000      0.0000      0.0000      0.0000
         5         0.0000      0.0000      0.0000      0.0000      0.0000

 Excitation energies and oscillator strengths:
 
 Excited State   1:      Triplet-A      2.0751 eV  597.48 nm  f=0.0000  <S**2>=2.000
      64 -> 72        -0.15116
      66 -> 72         0.11267
      68 -> 72         0.13007
      71 -> 72         0.63869
      71 -> 74         0.12828
 This state for optimization and/or second-order correction.
 Total Energy, E(TD-HF/TD-KS) =  -3262.45310699    
 Copying the excited state density for this state as the 1-particle RhoCI density.
 
 Excited State   2:      Triplet-A      2.3150 eV  535.57 nm  f=0.0000  <S**2>=2.000
      69 -> 72        -0.15697
      70 -> 72         0.66127
 
 Excited State   3:      Triplet-A      2.5640 eV  483.55 nm  f=0.0000  <S**2>=2.000
      67 -> 72        -0.56737
      67 -> 73         0.11443
      68 -> 72         0.30857
      69 -> 72        -0.14376
      70 -> 73        -0.11872
 
 Excited State   4:      Triplet-A      2.5908 eV  478.55 nm  f=0.0000  <S**2>=2.000
      66 -> 72         0.13517
      67 -> 72         0.35767
      68 -> 72         0.44646
      68 -> 74        -0.11482
      69 -> 72        -0.23785
      69 -> 73        -0.12026
      71 -> 72        -0.19081
 
 Excited State   5:      Triplet-A      2.7838 eV  445.38 nm  f=0.0000  <S**2>=2.000
      66 -> 72         0.24638
      68 -> 72         0.20441
      69 -> 72         0.58196
      70 -> 72         0.16125
 SavETr:  write IOETrn=   770 NScale= 10 NData=  16 NLR=1 NState=    5 LETran=      96.
 The selected state is a triplet
 CISAX will form     1 AO SS matrices at one time.
 NMat=     1 NSing=     0 JSym2X= 0.
 CISAX will form     1 AO SS matrices at one time.
 NMat=     1 NSing=     0 JSym2X= 0.
 Leave Link  914 at Sun Jan 12 19:39:20 2020, MaxMem=   134217728 cpu:      3070.0
 (Enter E:\Gaussian\G09W\l1002.exe)
 Minotr:  Closed shell wavefunction.
          Computing CIS/TD-HF/TD-KS derivatives.
          Using Z-Vector for PSCF gradient.
          Skipping F1 and S1 gradient terms here.
          IDoAtm=111111111111111111111111
 NEqPCM:  Using equilibrium solvation (IEInf=0, Eps=  35.6880, EpsInf=   1.8069)
          Frozen-core window.
          Direct CPHF calculation.
          Differentiating once with respect to electric field.
                with respect to dipole field.
          Differentiating once with respect to nuclear coordinates.
          Requested convergence is 1.0D-10 RMS, and 1.0D-09 maximum.
          NewPWx=F KeepS1=T KeepF1=T KeepIn=T MapXYZ=F SortEE=F KeepMc=T.
          MDV=     134217394 using IRadAn=       0.
 Using stored XC quadrature information.
          Solving linear equations separately, MaxMat=       0.
          There are     1 degrees of freedom in the 1st order CPHF.  IDoFFX=0 NUNeed=     1.
 FoFJK:  IHMeth= 1 ICntrl=       0 DoSepK=F KAlg= 0 I1Cent=   0 FoldK=F
 IRaf= 800000000 NMat=   1 IRICut=       1 DoRegI=T DoRafI=F ISym2E=-1.
 FoFCou: FMM=F IPFlag=           0 FMFlag=      100000 FMFlg1=           0
         NFxFlg=           0 DoJE=F BraDBF=F KetDBF=F FulRan=T
         wScrn=  0.000000 ICntrl=       0 IOpCl=  0 I1Cent=           0 NGrid=           0
         NMat0=    1 NMatS0=      1 NMatT0=    0 NMatD0=    1 NMtDS0=    0 NMtDT0=    0
 Petite list used in FoFCou.
 LinEq1:  Iter=  0 NonCon=     1 RMS=3.45D-03 Max=1.86D-01 NDo=     1
 AX will form     1 AO Fock derivatives at one time.
 LinEq1:  Iter=  1 NonCon=     1 RMS=2.42D-03 Max=1.24D-01 NDo=     1
 LinEq1:  Iter=  2 NonCon=     1 RMS=1.87D-03 Max=7.96D-02 NDo=     1
 LinEq1:  Iter=  3 NonCon=     1 RMS=1.03D-03 Max=4.98D-02 NDo=     1
 LinEq1:  Iter=  4 NonCon=     1 RMS=6.65D-04 Max=3.75D-02 NDo=     1
 LinEq1:  Iter=  5 NonCon=     1 RMS=4.67D-04 Max=1.93D-02 NDo=     1
 LinEq1:  Iter=  6 NonCon=     1 RMS=3.09D-04 Max=1.21D-02 NDo=     1
 LinEq1:  Iter=  7 NonCon=     1 RMS=2.21D-04 Max=8.10D-03 NDo=     1
 LinEq1:  Iter=  8 NonCon=     1 RMS=1.41D-04 Max=6.51D-03 NDo=     1
 LinEq1:  Iter=  9 NonCon=     1 RMS=1.11D-04 Max=4.80D-03 NDo=     1
 LinEq1:  Iter= 10 NonCon=     1 RMS=7.43D-05 Max=2.73D-03 NDo=     1
 LinEq1:  Iter= 11 NonCon=     1 RMS=4.67D-05 Max=1.59D-03 NDo=     1
 LinEq1:  Iter= 12 NonCon=     1 RMS=2.15D-05 Max=7.03D-04 NDo=     1
 LinEq1:  Iter= 13 NonCon=     1 RMS=1.13D-05 Max=3.18D-04 NDo=     1
 LinEq1:  Iter= 14 NonCon=     1 RMS=4.65D-06 Max=1.55D-04 NDo=     1
 LinEq1:  Iter= 15 NonCon=     1 RMS=2.60D-06 Max=7.04D-05 NDo=     1
 LinEq1:  Iter= 16 NonCon=     1 RMS=9.22D-07 Max=3.05D-05 NDo=     1
 LinEq1:  Iter= 17 NonCon=     1 RMS=6.44D-07 Max=1.74D-05 NDo=     1
 LinEq1:  Iter= 18 NonCon=     1 RMS=3.31D-07 Max=1.25D-05 NDo=     1
 LinEq1:  Iter= 19 NonCon=     1 RMS=1.73D-07 Max=7.88D-06 NDo=     1
 LinEq1:  Iter= 20 NonCon=     1 RMS=7.25D-08 Max=3.67D-06 NDo=     1
 LinEq1:  Iter= 21 NonCon=     1 RMS=3.97D-08 Max=1.87D-06 NDo=     1
 LinEq1:  Iter= 22 NonCon=     1 RMS=1.86D-08 Max=7.50D-07 NDo=     1
 LinEq1:  Iter= 23 NonCon=     1 RMS=1.15D-08 Max=4.76D-07 NDo=     1
 LinEq1:  Iter= 24 NonCon=     1 RMS=5.55D-09 Max=2.33D-07 NDo=     1
 LinEq1:  Iter= 25 NonCon=     1 RMS=3.23D-09 Max=1.20D-07 NDo=     1
 LinEq1:  Iter= 26 NonCon=     1 RMS=1.39D-09 Max=3.05D-08 NDo=     1
 LinEq1:  Iter= 27 NonCon=     1 RMS=4.10D-10 Max=1.16D-08 NDo=     1
 LinEq1:  Iter= 28 NonCon=     1 RMS=1.87D-10 Max=4.22D-09 NDo=     1
 LinEq1:  Iter= 29 NonCon=     1 RMS=1.07D-10 Max=3.60D-09 NDo=     1
 LinEq1:  Iter= 30 NonCon=     0 RMS=2.26D-11 Max=7.25D-10 NDo=     1
 Linear equations converged to 1.000D-10 1.000D-09 after    30 iterations.
 End of Minotr F.D. properties file   721 does not exist.
 End of Minotr F.D. properties file   722 does not exist.
 End of Minotr F.D. properties file   788 does not exist.
 Leave Link 1002 at Sun Jan 12 20:15:36 2020, MaxMem=   134217728 cpu:      2176.0
 (Enter E:\Gaussian\G09W\l701.exe)
 Compute integral first derivatives.
 ... and contract with generalized density number  6.
 R6Disp: Adding Grimme-D3(BJ) dispersion energy 1st derivatives to the gradient.
 D1PCM: PCM CHGder 1st derivatives, ID1Alg=3 FixD1E=F DoIter=F DoCFld=F I1PDM=6.
 GePol: Maximum number of non-zero 1st derivatives   =     350
 Leave Link  701 at Sun Jan 12 20:16:27 2020, MaxMem=   134217728 cpu:        51.0
 (Enter E:\Gaussian\G09W\l702.exe)
 L702 exits ... SP integral derivatives will be done elsewhere.
 Leave Link  702 at Sun Jan 12 20:16:27 2020, MaxMem=   134217728 cpu:         0.0
 (Enter E:\Gaussian\G09W\l703.exe)
 Compute integral first derivatives, UseDBF=F ICtDFT=           0.
 Integral derivatives from FoFJK, PRISM(SPDF).
 Calling FoFJK, ICntrl=  10005127 FMM=F ISym2X=0 I1Cent= 0 IOpClX= 0 NMat=1 NMatS=1 NMatT=0.
 FoFJK:  IHMeth= 1 ICntrl=10005127 DoSepK=F KAlg= 0 I1Cent=   0 FoldK=F
 IRaf=         0 NMat=   1 IRICut=       1 DoRegI=T DoRafI=F ISym2E= 0.
 FoFCou: FMM=F IPFlag=           0 FMFlag=      100000 FMFlg1=         800
         NFxFlg=           0 DoJE=F BraDBF=F KetDBF=F FulRan=T
         wScrn=  0.000000 ICntrl=10005127 IOpCl=  0 I1Cent=           0 NGrid=           0
         NMat0=    1 NMatS0=      1 NMatT0=    0 NMatD0=    1 NMtDS0=    0 NMtDT0=    0
 Symmetry not used in FoFCou.
 Leave Link  703 at Sun Jan 12 20:20:20 2020, MaxMem=   134217728 cpu:       233.0
 (Enter E:\Gaussian\G09W\l716.exe)
 Dipole        =-1.36483042D+00 5.14368805D-01-7.26853960D-02
 ***** Axes restored to original set *****
 -------------------------------------------------------------------
 Center     Atomic                   Forces (Hartrees/Bohr)
 Number     Number              X              Y              Z
 -------------------------------------------------------------------
      1        6          -0.000738073   -0.000676791    0.000095585
      2        6           0.000374886    0.000337021    0.000187220
      3        6           0.001264110   -0.000723547    0.000334683
      4        6           0.000472228    0.001006730    0.001338138
      5        6          -0.000221448   -0.001296409    0.000009268
      6        6          -0.000624519    0.000057308    0.000045803
      7        1          -0.000275033    0.000090847   -0.000057262
      8        1          -0.000063500    0.000030882    0.000175360
      9        1          -0.000505627   -0.000456087    0.000213871
     10        1          -0.000153529   -0.000214819   -0.000168922
     11        6          -0.000809509    0.003804154   -0.005442462
     12        8           0.000559140   -0.003078438    0.002099882
     13        6          -0.000610192   -0.000213245   -0.002704652
     14        6          -0.001301029    0.001591350    0.003482948
     15        6          -0.000489591   -0.001733240   -0.000913907
     16        6           0.001446974   -0.000125110   -0.000612568
     17        6           0.000093508   -0.000517325    0.001006803
     18        6           0.000067002    0.000737417   -0.000035754
     19        1           0.000554215   -0.000281906   -0.000003357
     20        6           0.000745590   -0.001023601    0.000129824
     21        1          -0.000007788    0.000077183   -0.000053636
     22        1           0.000320807    0.000067519   -0.000350153
     23       35           0.000428043   -0.000078499   -0.000021220
     24        8          -0.000526664    0.002618605    0.001244508
 -------------------------------------------------------------------
 Cartesian Forces:  Max     0.005442462 RMS     0.001247081
 Leave Link  716 at Sun Jan 12 20:20:21 2020, MaxMem=   134217728 cpu:         0.0
 (Enter E:\Gaussian\G09W\l103.exe)

 GradGradGradGradGradGradGradGradGradGradGradGradGradGradGradGradGradGrad
 Berny optimization.
 Using GEDIIS/GDIIS optimizer.
 FormGI is forming the generalized inverse of G from B-inverse, IUseBI=4.
 Internal  Forces:  Max     0.003018952 RMS     0.000670839
 Search for a local minimum.
 Step number   3 out of a maximum of  142
 All quantities printed in internal units (Hartrees-Bohrs-Radians)
 RMS Force = .67084D-03 SwitMx=.10000D-02 MixMth= 2
 Mixed Optimization -- En-DIIS/RFO-DIIS
 Swapping is turned off.
 Update second derivatives using D2CorX and points    1    2    3
 DE= -2.10D-04 DEPred=-5.29D-04 R= 3.97D-01
 Trust test= 3.97D-01 RLast= 2.96D-01 DXMaxT set to 5.05D-01
 ITU=  0  1  0
     Eigenvalues ---    0.00548   0.01388   0.01492   0.01527   0.01587
     Eigenvalues ---    0.01676   0.01726   0.01785   0.01849   0.01948
     Eigenvalues ---    0.02026   0.02081   0.02086   0.02133   0.02144
     Eigenvalues ---    0.02159   0.02175   0.02183   0.02241   0.02286
     Eigenvalues ---    0.03484   0.15772   0.15996   0.16000   0.16000
     Eigenvalues ---    0.16000   0.16000   0.16137   0.19540   0.21971
     Eigenvalues ---    0.22492   0.22583   0.23395   0.24096   0.24510
     Eigenvalues ---    0.24864   0.24965   0.24980   0.24990   0.24998
     Eigenvalues ---    0.25414   0.33105   0.34432   0.35241   0.35421
     Eigenvalues ---    0.35440   0.35585   0.35609   0.35705   0.35732
     Eigenvalues ---    0.35810   0.36425   0.37480   0.38324   0.38881
     Eigenvalues ---    0.39863   0.41393   0.43584   0.43776   0.44483
     Eigenvalues ---    0.46998   0.47556   0.48877   0.52487   0.77325
     Eigenvalues ---    0.85308
 En-DIIS/RFO-DIIS IScMMF=        0 using points:     3    2
 RFO step:  Lambda=-1.31540252D-04.
 NNeg= 0 NP= 2 Switch=  2.50D-03 Rises=F DC=  2.10D-04 SmlDif=  1.00D-05
 RMS Error=  0.1930360813D-02 NUsed= 2 EDIIS=F
 DidBck=T Rises=F RFO-DIIS coefs:    0.63320    0.36680
 Iteration  1 RMS(Cart)=  0.01035994 RMS(Int)=  0.00029962
 Iteration  2 RMS(Cart)=  0.00023611 RMS(Int)=  0.00016381
 Iteration  3 RMS(Cart)=  0.00000003 RMS(Int)=  0.00016381
 ITry= 1 IFail=0 DXMaxC= 7.85D-02 DCOld= 1.00D+10 DXMaxT= 5.05D-01 DXLimC= 3.00D+00 Rises=F
 Variable       Old X    -DE/DX   Delta X   Delta X   Delta X     New X
                                 (Linear)    (Quad)   (Total)
    R1        2.61243   0.00133   0.00016   0.00184   0.00195   2.61438
    R2        2.65276   0.00009   0.00069  -0.00088  -0.00027   2.65249
    R3        2.04842   0.00029   0.00020   0.00031   0.00050   2.04892
    R4        2.65336   0.00072   0.00121  -0.00080   0.00044   2.65380
    R5        2.04590   0.00005   0.00028  -0.00036  -0.00007   2.04583
    R6        2.67412   0.00007   0.00022  -0.00026   0.00003   2.67416
    R7        2.76808   0.00109  -0.00038   0.00295   0.00255   2.77062
    R8        2.65119   0.00219   0.00210   0.00044   0.00258   2.65377
    R9        2.78526   0.00003  -0.00199   0.00330   0.00133   2.78658
   R10        2.61118   0.00059   0.00003   0.00091   0.00091   2.61209
   R11        2.04584   0.00033   0.00013   0.00048   0.00061   2.04645
   R12        2.04813   0.00025   0.00024   0.00016   0.00040   2.04853
   R13        2.33991   0.00302   0.00268  -0.00164   0.00104   2.34095
   R14        2.76701   0.00015  -0.00045   0.00105   0.00062   2.76763
   R15        2.69488   0.00171   0.00388  -0.00288   0.00097   2.69585
   R16        2.39777   0.00263  -0.00105   0.00417   0.00313   2.40090
   R17        2.79014  -0.00077  -0.00510   0.00645   0.00143   2.79157
   R18        2.60499   0.00253   0.00153   0.00162   0.00319   2.60818
   R19        2.72381   0.00075   0.00124  -0.00070   0.00058   2.72440
   R20        2.64244  -0.00004   0.00173  -0.00292  -0.00124   2.64121
   R21        2.04417   0.00039   0.00009   0.00068   0.00077   2.04494
   R22        2.56004   0.00110   0.00144  -0.00074   0.00067   2.56071
   R23        2.04301   0.00007   0.00015  -0.00011   0.00004   2.04305
   R24        2.74543  -0.00106  -0.00453   0.00517   0.00057   2.74599
   R25        3.53860   0.00043   0.00057   0.00097   0.00153   3.54013
   R26        2.04351   0.00029   0.00027   0.00018   0.00045   2.04396
    A1        2.09792   0.00009  -0.00038   0.00088   0.00047   2.09839
    A2        2.09288  -0.00005  -0.00020   0.00020   0.00001   2.09289
    A3        2.09238  -0.00004   0.00058  -0.00107  -0.00048   2.09190
    A4        2.10337   0.00050   0.00084   0.00001   0.00093   2.10429
    A5        2.11292  -0.00031  -0.00113   0.00089  -0.00027   2.11265
    A6        2.06689  -0.00019   0.00029  -0.00090  -0.00066   2.06624
    A7        2.08310  -0.00066  -0.00076  -0.00075  -0.00156   2.08154
    A8        2.08042   0.00013  -0.00034   0.00159   0.00090   2.08132
    A9        2.11960   0.00053   0.00110  -0.00087   0.00070   2.12030
   A10        2.08083   0.00039   0.00021   0.00108   0.00120   2.08202
   A11        2.12949  -0.00042  -0.00088  -0.00079  -0.00117   2.12832
   A12        2.07280   0.00003   0.00066  -0.00023   0.00002   2.07282
   A13        2.10820  -0.00015  -0.00024  -0.00012  -0.00026   2.10794
   A14        2.05737   0.00069   0.00216  -0.00038   0.00173   2.05910
   A15        2.11760  -0.00054  -0.00192   0.00051  -0.00146   2.11614
   A16        2.09288  -0.00017   0.00030  -0.00097  -0.00070   2.09218
   A17        2.09354   0.00014   0.00038  -0.00010   0.00028   2.09382
   A18        2.09677   0.00003  -0.00067   0.00108   0.00042   2.09719
   A19        2.13636  -0.00046  -0.00010  -0.00071  -0.00096   2.13540
   A20        2.03047   0.00063  -0.00052   0.00124   0.00154   2.03201
   A21        2.11566  -0.00010   0.00014   0.00003   0.00001   2.11567
   A22        2.06691  -0.00105  -0.00378   0.00323  -0.00050   2.06641
   A23        2.12643   0.00049   0.00377  -0.00333  -0.00030   2.12614
   A24        2.08841   0.00062   0.00034   0.00261   0.00222   2.09063
   A25        2.11423  -0.00025  -0.00045  -0.00095  -0.00088   2.11335
   A26        2.09080   0.00001  -0.00011   0.00100   0.00049   2.09129
   A27        2.07749   0.00025   0.00074   0.00010   0.00072   2.07821
   A28        2.10551   0.00058   0.00182  -0.00191   0.00036   2.10587
   A29        2.09634   0.00052  -0.00108   0.00403   0.00256   2.09891
   A30        2.08103  -0.00108  -0.00065  -0.00197  -0.00272   2.07832
   A31        2.09517   0.00025  -0.00053   0.00171   0.00126   2.09643
   A32        2.07122   0.00037   0.00249  -0.00215   0.00031   2.07153
   A33        2.11679  -0.00062  -0.00197   0.00044  -0.00157   2.11522
   A34        2.10572   0.00088   0.00074   0.00149   0.00229   2.10802
   A35        2.05718  -0.00042   0.00029  -0.00167  -0.00143   2.05575
   A36        2.12008  -0.00045  -0.00105   0.00039  -0.00071   2.11937
   A37        2.12726  -0.00041   0.00026  -0.00183  -0.00159   2.12567
   A38        2.09163   0.00028  -0.00212   0.00438   0.00227   2.09390
   A39        2.06429   0.00013   0.00185  -0.00255  -0.00068   2.06361
   A40        2.07885   0.00013  -0.00057   0.00114   0.00054   2.07939
   A41        2.12150   0.00011  -0.00160   0.00338   0.00180   2.12329
   A42        2.08279  -0.00024   0.00218  -0.00449  -0.00230   2.08049
    D1       -0.00642   0.00010  -0.00034   0.00460   0.00427  -0.00215
    D2        3.13504   0.00010   0.00233  -0.00046   0.00189   3.13693
    D3        3.13482   0.00010  -0.00169   0.00654   0.00485   3.13967
    D4       -0.00690   0.00010   0.00098   0.00148   0.00247  -0.00444
    D5       -0.00327   0.00004  -0.00122   0.00390   0.00268  -0.00059
    D6        3.13942   0.00002  -0.00094   0.00196   0.00102   3.14044
    D7        3.13867   0.00005   0.00014   0.00196   0.00210   3.14077
    D8       -0.00183   0.00003   0.00042   0.00002   0.00044  -0.00139
    D9        0.01211  -0.00016   0.00237  -0.01054  -0.00815   0.00395
   D10       -3.14105   0.00005   0.00967  -0.01425  -0.00454   3.13760
   D11       -3.12935  -0.00016  -0.00023  -0.00561  -0.00584  -3.13519
   D12        0.00068   0.00005   0.00707  -0.00932  -0.00223  -0.00155
   D13       -0.00819   0.00006  -0.00285   0.00803   0.00516  -0.00304
   D14        3.12108   0.00013  -0.00384   0.01439   0.01049   3.13157
   D15       -3.13796  -0.00015  -0.01033   0.01181   0.00146  -3.13650
   D16       -0.00869  -0.00008  -0.01131   0.01817   0.00680  -0.00189
   D17       -3.12655  -0.00077  -0.02982   0.01402  -0.01586   3.14078
   D18       -0.04270   0.00055  -0.02151   0.06450   0.04292   0.00022
   D19        0.00324  -0.00056  -0.02235   0.01023  -0.01218  -0.00895
   D20        3.08708   0.00076  -0.01404   0.06071   0.04660   3.13368
   D21       -0.00136   0.00009   0.00136   0.00035   0.00172   0.00035
   D22        3.13500   0.00008   0.00138   0.00096   0.00235   3.13735
   D23       -3.13104   0.00002   0.00232  -0.00580  -0.00344  -3.13448
   D24        0.00533   0.00002   0.00235  -0.00519  -0.00281   0.00252
   D25       -3.10191  -0.00113   0.00442  -0.05427  -0.04982   3.13146
   D26        0.00014   0.00083   0.04353  -0.03833   0.00517   0.00532
   D27        0.02742  -0.00105   0.00343  -0.04793  -0.04450  -0.01708
   D28        3.12947   0.00091   0.04255  -0.03198   0.01049   3.13996
   D29        0.00714  -0.00014   0.00069  -0.00636  -0.00567   0.00148
   D30       -3.13555  -0.00012   0.00041  -0.00441  -0.00400  -3.13955
   D31       -3.12904  -0.00014   0.00065  -0.00699  -0.00633  -3.13536
   D32        0.01146  -0.00012   0.00037  -0.00504  -0.00466   0.00680
   D33        0.01357  -0.00097  -0.04348   0.03169  -0.01173   0.00184
   D34        3.11563  -0.00057  -0.03670   0.03627  -0.00035   3.11528
   D35        3.11612   0.00095  -0.00485   0.04741   0.04257  -3.12449
   D36       -0.06500   0.00135   0.00193   0.05199   0.05394  -0.01106
   D37        0.01050   0.00041   0.02187  -0.01643   0.00548   0.01599
   D38        3.12572   0.00076   0.02709  -0.00974   0.01743  -3.14004
   D39       -3.07464  -0.00087   0.01368  -0.06558  -0.05199  -3.12662
   D40        0.04058  -0.00052   0.01890  -0.05889  -0.04004   0.00054
   D41       -0.01932   0.00037   0.01172  -0.00516   0.00658  -0.01274
   D42       -3.13476   0.00000   0.00655  -0.01188  -0.00531  -3.14007
   D43       -3.12167  -0.00002   0.00500  -0.00973  -0.00471  -3.12638
   D44        0.04607  -0.00039  -0.00017  -0.01645  -0.01660   0.02947
   D45       -3.13014  -0.00025  -0.00561   0.00141  -0.00423  -3.13436
   D46        0.01495  -0.00019  -0.00422  -0.00003  -0.00428   0.01068
   D47       -0.02725   0.00013   0.00101   0.00587   0.00689  -0.02036
   D48        3.11784   0.00019   0.00240   0.00443   0.00683   3.12468
   D49        3.12753   0.00003  -0.00645   0.01186   0.00535   3.13287
   D50        0.00718  -0.00023  -0.00543   0.00031  -0.00517   0.00202
   D51       -0.04008   0.00040  -0.00129   0.01845   0.01715  -0.02292
   D52        3.12276   0.00014  -0.00026   0.00690   0.00664   3.12940
   D53        0.00216   0.00005  -0.00058   0.00305   0.00248   0.00464
   D54       -3.13954   0.00007   0.00190  -0.00120   0.00070  -3.13884
   D55        3.14016  -0.00001  -0.00198   0.00452   0.00253  -3.14049
   D56       -0.00153   0.00002   0.00050   0.00027   0.00076  -0.00078
   D57        0.01511  -0.00019   0.00176  -0.00961  -0.00788   0.00724
   D58       -3.11622  -0.00034   0.00081  -0.01323  -0.01243  -3.12865
   D59        3.13468   0.00008   0.00071   0.00233   0.00302   3.13770
   D60        0.00335  -0.00006  -0.00023  -0.00129  -0.00154   0.00182
   D61        0.00458  -0.00003  -0.00088  -0.00127  -0.00215   0.00243
   D62        3.13614   0.00011   0.00003   0.00231   0.00232   3.13846
   D63       -3.13691  -0.00005  -0.00333   0.00292  -0.00040  -3.13732
   D64       -0.00535   0.00009  -0.00243   0.00650   0.00406  -0.00129
         Item               Value     Threshold  Converged?
 Maximum Force            0.003019     0.000450     NO 
 RMS     Force            0.000671     0.000300     NO 
 Maximum Displacement     0.078473     0.001800     NO 
 RMS     Displacement     0.010339     0.001200     NO 
 Predicted change in Energy=-2.468196D-04
 Lowest energy point so far.  Saving SCF results.
 GradGradGradGradGradGradGradGradGradGradGradGradGradGradGradGradGradGrad

 Leave Link  103 at Sun Jan 12 20:20:22 2020, MaxMem=   134217728 cpu:         1.0
 (Enter E:\Gaussian\G09W\l202.exe)
                          Input orientation:                          
 ---------------------------------------------------------------------
 Center     Atomic      Atomic             Coordinates (Angstroms)
 Number     Number       Type             X           Y           Z
 ---------------------------------------------------------------------
      1          6           0       -5.050588    0.075820    0.130329
      2          6           0       -4.013742    0.991450    0.106759
      3          6           0       -2.678722    0.557696    0.065167
      4          6           0       -2.402653   -0.830034    0.042636
      5          6           0       -3.469265   -1.743208    0.066067
      6          6           0       -4.778127   -1.300972    0.110248
      7          1           0       -6.077374    0.422433    0.164215
      8          1           0       -4.208857    2.056274    0.117486
      9          1           0       -3.233851   -2.800015    0.044072
     10          1           0       -5.593797   -2.014712    0.129931
     11          6           0       -1.024091   -1.350454   -0.013640
     12          8           0       -0.773413   -2.563565   -0.023079
     13          6           0       -1.602631    1.553070    0.035905
     14          6           0        0.048470   -0.353473   -0.038146
     15          6           0       -0.253143    1.092269   -0.005186
     16          6           0        1.366225   -0.763353   -0.059203
     17          6           0        0.836275    2.036121   -0.033036
     18          6           0        2.394818    0.182825   -0.073906
     19          1           0        1.580275   -1.824080   -0.067255
     20          6           0        2.122312    1.610112   -0.061988
     21          1           0        0.591324    3.089058   -0.019728
     22          1           0        2.950615    2.305619   -0.071185
     23         35           0        4.181941   -0.378036   -0.106944
     24          8           0       -1.843501    2.800476    0.047356
 ---------------------------------------------------------------------
                    Distance matrix (angstroms):
                    1          2          3          4          5
     1  C    0.000000
     2  C    1.383468   0.000000
     3  C    2.421198   1.404333   0.000000
     4  C    2.799968   2.432596   1.415103   0.000000
     5  C    2.411136   2.788632   2.432924   1.404314   0.000000
     6  C    1.403636   2.416505   2.804314   2.422650   1.382261
     7  H    1.084241   2.141416   3.402785   3.884203   3.391441
     8  H    2.151947   1.082606   2.142379   3.405694   3.871138
     9  H    3.402705   3.871352   3.403357   2.138158   1.082933
    10  H    2.159954   3.396192   3.888334   3.405067   2.142762
    11  C    4.274068   3.799608   2.526866   1.474597   2.477798
    12  O    5.028331   4.811935   3.657903   2.379889   2.819317
    13  C    3.752279   2.476670   1.466151   2.513815   3.788230
    14  C    5.119870   4.281516   2.877235   2.498328   3.783740
    15  C    4.905814   3.763615   2.484784   2.884082   4.288176
    16  C    6.474227   5.661353   4.257022   3.770843   4.935359
    17  C    6.206821   4.963219   3.814524   4.325648   5.729820
    18  C    7.448975   6.461900   5.089271   4.904609   6.173869
    19  H    6.900507   6.265023   4.881541   4.106570   5.051947
    20  C    7.337679   6.169471   4.916673   5.142039   6.521264
    21  H    6.397913   5.061876   4.136207   4.932248   6.312412
    22  H    8.308542   7.089497   5.896038   6.205059   7.591225
    23  Br   9.246723   8.312062   6.926321   6.601784   7.773968
    24  O    4.209043   2.825959   2.393319   3.673319   4.825819
                    6          7          8          9         10
     6  C    0.000000
     7  H    2.158954   0.000000
     8  H    3.405176   2.482535   0.000000
     9  H    2.153206   4.299329   4.953743   0.000000
    10  H    1.084034   2.484893   4.300133   2.488658   0.000000
    11  C    3.756405   5.358211   4.665375   2.643406   4.619963
    12  O    4.201148   6.089603   5.758901   2.472685   4.853942
    13  C    4.270230   4.617157   2.655614   4.648688   5.354187
    14  C    4.920957   6.178103   4.894481   4.094626   5.884144
    15  C    5.120196   5.865070   4.073331   4.902747   6.180144
    16  C    6.170154   7.540767   6.250044   5.031834   7.074148
    17  C    6.532858   7.102215   5.047417   6.321400   7.601424
    18  C    7.327121   8.478924   6.866947   6.371277   8.287864
    19  H    6.382353   7.983733   6.971752   4.913314   7.179313
    20  C    7.491337   8.288342   6.349407   6.938945   8.527281
    21  H    6.936877   7.184446   4.911945   7.022622   8.020386
    22  H    8.530760   9.225313   7.166297   8.020499   9.576674
    23  Br   9.010095  10.294068   8.739664   7.802741   9.914630
    24  O    5.043596   4.857410   2.480657   5.770493   6.103898
                   11         12         13         14         15
    11  C    0.000000
    12  O    1.238776   0.000000
    13  C    2.961016   4.199734   0.000000
    14  C    1.464568   2.358013   2.523198   0.000000
    15  C    2.561509   3.692712   1.426585   1.477236   0.000000
    16  C    2.461783   2.796447   3.766824   1.380189   2.463453
    17  C    3.863966   4.873224   2.487238   2.516113   1.441688
    18  C    3.747468   4.193201   4.227200   2.407123   2.800626
    19  H    2.647625   2.467517   4.641839   2.123666   3.445339
    20  C    4.320549   5.079992   3.726665   2.856056   2.431907
    21  H    4.724286   5.815038   2.678767   3.485119   2.168064
    22  H    5.400785   6.130225   4.616259   3.936281   3.426462
    23  Br   5.296893   5.416559   6.100070   4.134116   4.673556
    24  O    4.231474   5.470191   1.270500   3.678894   2.334517
                   16         17         18         19         20
    16  C    0.000000
    17  C    2.849314   0.000000
    18  C    1.397667   2.421865   0.000000
    19  H    1.082138   3.931394   2.165916   0.000000
    20  C    2.490987   1.355069   1.453117   3.476709   0.000000
    21  H    3.929772   1.081136   3.420777   5.011907   2.129082
    22  H    3.453842   2.131787   2.194350   4.351121   1.081619
    23  Br   2.842360   4.126391   1.873357   2.976791   2.863010
    24  O    4.797351   2.787813   4.982986   5.755162   4.142052
                   21         22         23         24
    21  H    0.000000
    22  H    2.486500   0.000000
    23  Br   4.992082   2.952871   0.000000
    24  O    2.452785   4.821046   6.814155   0.000000
 Stoichiometry    C14H7BrO2
 Framework group  C1[X(C14H7BrO2)]
 Deg. of freedom    66
 Full point group                 C1      NOp   1
 RotChk:  IX=0 Diff= 1.13D-03
 Largest Abelian subgroup         C1      NOp   1
 Largest concise Abelian subgroup C1      NOp   1
                         Standard orientation:                         
 ---------------------------------------------------------------------
 Center     Atomic      Atomic             Coordinates (Angstroms)
 Number     Number       Type             X           Y           Z
 ---------------------------------------------------------------------
      1          6           0        5.055224    0.086998   -0.015995
      2          6           0        4.015541    0.999704   -0.012471
      3          6           0        2.681126    0.562150   -0.006660
      4          6           0        2.408487   -0.826422    0.000448
      5          6           0        3.477916   -1.736594   -0.002184
      6          6           0        4.786222   -1.290612   -0.011180
      7          1           0        6.081556    0.436544   -0.022281
      8          1           0        4.207866    2.065089   -0.011779
      9          1           0        3.245003   -2.794139    0.007439
     10          1           0        5.604133   -2.002044   -0.015052
     11          6           0        1.030424   -1.350846    0.019324
     12          8           0        0.783001   -2.564655    0.015052
     13          6           0        1.601845    1.554459    0.002075
     14          6           0       -0.045216   -0.356893    0.023401
     15          6           0        0.253054    1.089824    0.006861
     16          6           0       -1.361929   -0.770398    0.009260
     17          6           0       -0.839370    2.030584    0.013534
     18          6           0       -2.393228    0.172933    0.004313
     19          1           0       -1.573129   -1.831719    0.005450
     20          6           0       -2.124526    1.600986    0.007972
     21          1           0       -0.597126    3.084231    0.012807
     22          1           0       -2.954755    2.294217    0.000936
     23         35           0       -4.179037   -0.392873   -0.010416
     24          8           0        1.839416    2.802547    0.004305
 ---------------------------------------------------------------------
 Rotational constants (GHZ):      0.9871908      0.1794385      0.1518425
 Leave Link  202 at Sun Jan 12 20:20:22 2020, MaxMem=   134217728 cpu:         0.0
 (Enter E:\Gaussian\G09W\l301.exe)
 Standard basis: 6-311G(d) (5D, 7F)
 Ernie: Thresh=  0.10000D-02 Tol=  0.10000D-05 Strict=F.
 There are   372 symmetry adapted cartesian basis functions of A   symmetry.
 There are   353 symmetry adapted basis functions of A   symmetry.
   353 basis functions,   637 primitive gaussians,   372 cartesian basis functions
    71 alpha electrons       71 beta electrons
       nuclear repulsion energy      1373.6543512682 Hartrees.
 IExCor=  402 DFT=T Ex+Corr=B3LYP ExCW=0 ScaHFX=  0.200000
 ScaDFX=  0.800000  0.720000  1.000000  0.810000 ScalE2=  1.000000  1.000000
 IRadAn=      0 IRanWt=     -1 IRanGd=            0 ICorTp=0 IEmpDi=141
 NAtoms=   24 NActive=   24 NUniq=   24 SFac= 1.00D+00 NAtFMM=   60 NAOKFM=F Big=F
 Integral buffers will be    262144 words long.
 Regular integral format.
 Two-electron integral symmetry is turned on.
 R6Disp:  Grimme-D3(BJ) Dispersion energy=       -0.0619671606 Hartrees.
 Nuclear repulsion after empirical dispersion term =     1373.5923841075 Hartrees.
 ------------------------------------------------------------------------------
 Polarizable Continuum Model (PCM)
 =================================
 Model                : PCM (using non-symmetric T matrix).
 Atomic radii         : UFF (Universal Force Field).
 Polarization charges : Total charges.
 Charge compensation  : None.
 Solution method      : On-the-fly selection.
 Cavity type          : Scaled VdW (van der Waals Surface) (Alpha=1.100).
 Cavity algorithm     : GePol (No added spheres)
                        Default sphere list used, NSphG=   24.
                        Lebedev-Laikov grids with approx.  5.0 points / Ang**2.
                        Smoothing algorithm: Karplus/York (Gamma=1.0000).
                        Polarization charges: spherical gaussians, with
                                              point-specific exponents (IZeta= 3).
                        Self-potential: point-specific (ISelfS= 7).
                        Self-field    : sphere-specific E.n sum rule (ISelfD= 2).
 1st derivatives      : Analytical E(r).r(x)/FMM algorithm (CHGder, D1EAlg=3).
                        Cavity 1st derivative terms included.
 Solvent              : Acetonitrile, Eps=  35.688000 Eps(inf)=   1.806874
 ------------------------------------------------------------------------------
 GePol: Number of generator spheres                  =      24
 GePol: Total number of spheres                      =      24
 GePol: Number of exposed spheres                    =      24 (100.00%)
 GePol: Number of points                             =    2169
 GePol: Average weight of points                     =       0.13
 GePol: Minimum weight of points                     =   0.96D-09
 GePol: Maximum weight of points                     =    0.20577
 GePol: Number of points with low weight             =     134
 GePol: Fraction of low-weight points (<1% of avg)   =       6.18%
 GePol: Cavity surface area                          =    279.787 Ang**2
 GePol: Cavity volume                                =    306.056 Ang**3
 Leave Link  301 at Sun Jan 12 20:20:23 2020, MaxMem=   134217728 cpu:         0.0
 (Enter E:\Gaussian\G09W\l302.exe)
 NPDir=0 NMtPBC=     1 NCelOv=     1 NCel=       1 NClECP=     1 NCelD=      1
         NCelK=      1 NCelE2=     1 NClLst=     1 CellRange=     0.0.
 One-electron integrals computed using PRISM.
 NBasis=   353 RedAO= T EigKep=  1.00D-04  NBF=   353
 NBsUse=   353 1.00D-06 EigRej= -1.00D+00 NBFU=   353
 Precomputing XC quadrature grid using
 IXCGrd= 4 IRadAn=           0 IRanWt=          -1 IRanGd=           0 AccXCQ= 0.00D+00.
 Generated NRdTot=       0 NPtTot=           0 NUsed=           0 NTot=          16
 NSgBfM=   363   363   363   363   363 MxSgAt=    24 MxSgA2=    24.
 Leave Link  302 at Sun Jan 12 20:20:25 2020, MaxMem=   134217728 cpu:         2.0
 (Enter E:\Gaussian\G09W\l308.exe)
 Leave Link  308 at Sun Jan 12 20:20:26 2020, MaxMem=   134217728 cpu:         0.0
 (Enter E:\Gaussian\G09W\l303.exe)
 DipDrv:  MaxL=1.
 Leave Link  303 at Sun Jan 12 20:20:26 2020, MaxMem=   134217728 cpu:         0.0
 (Enter E:\Gaussian\G09W\l401.exe)
 Initial guess from the checkpoint file:  "E:\Gaussian file\error\2-BrAQ excited triplet state opt.chk"
 B after Tr=     0.000000    0.000000    0.000000
         Rot=    1.000000    0.000006    0.000000    0.000024 Ang=   0.00 deg.
 Guess basis will be translated and rotated to current coordinates.
 JPrj=2 DoOrth=T DoCkMO=T.
 Generating alternative initial guess.
 ExpMin= 1.03D-01 ExpMax= 4.40D+05 ExpMxC= 1.51D+04 IAcc=2 IRadAn=         4 AccDes= 0.00D+00
 Harris functional with IExCor=  402 and IRadAn=       4 diagonalized for initial guess.
 HarFok:  IExCor=  402 AccDes= 0.00D+00 IRadAn=         4 IDoV= 1 UseB2=F ITyADJ=14
 ICtDFT=  3500011 ScaDFX=  1.000000  1.000000  1.000000  1.000000
 FoFCou: FMM=F IPFlag=           0 FMFlag=      100000 FMFlg1=           0
         NFxFlg=           0 DoJE=T BraDBF=F KetDBF=T FulRan=T
         wScrn=  0.000000 ICntrl=     500 IOpCl=  0 I1Cent=   200000004 NGrid=           0
         NMat0=    1 NMatS0=      1 NMatT0=    0 NMatD0=    1 NMtDS0=    0 NMtDT0=    0
 Petite list used in FoFCou.
 Harris En= -3262.59071191491    
 Leave Link  401 at Sun Jan 12 20:20:44 2020, MaxMem=   134217728 cpu:        17.0
 (Enter E:\Gaussian\G09W\l502.exe)
 Closed shell SCF:
 Using DIIS extrapolation, IDIIS=  1040.
 Integral symmetry usage will be decided dynamically.
 IVT=      438130 IEndB=      438130 NGot=   134217728 MDV=   133934995
 LenX=   133934995 LenY=   133796170
 Requested convergence on RMS density matrix=1.00D-08 within 128 cycles.
 Requested convergence on MAX density matrix=1.00D-06.
 Requested convergence on             energy=1.00D-06.
 No special actions if energy rises.
 Fock matrices will be formed incrementally for  20 cycles.

 Cycle   1  Pass 1  IDiag  1:
 FoFJK:  IHMeth= 1 ICntrl=       0 DoSepK=F KAlg= 0 I1Cent=   0 FoldK=F
 IRaf= 780000000 NMat=   1 IRICut=       1 DoRegI=T DoRafI=F ISym2E= 0.
 FoFCou: FMM=F IPFlag=           0 FMFlag=      100000 FMFlg1=           0
         NFxFlg=           0 DoJE=F BraDBF=F KetDBF=F FulRan=T
         wScrn=  0.000000 ICntrl=       0 IOpCl=  0 I1Cent=           0 NGrid=           0
         NMat0=    1 NMatS0=      1 NMatT0=    0 NMatD0=    1 NMtDS0=    0 NMtDT0=    0
 Symmetry not used in FoFCou.
 Inv3:  Mode=1 IEnd=    14113683.
 Iteration    1 A*A^-1 deviation from unit magnitude is 3.33D-15 for   1528.
 Iteration    1 A*A^-1 deviation from orthogonality  is 3.59D-15 for   1528   1225.
 Iteration    1 A^-1*A deviation from unit magnitude is 2.22D-15 for     46.
 Iteration    1 A^-1*A deviation from orthogonality  is 1.29D-12 for   1297   1247.
 E= -3262.52729553232    
 DIIS: error= 2.60D-03 at cycle   1 NSaved=   1.
 NSaved= 1 IEnMin= 1 EnMin= -3262.52729553232     IErMin= 1 ErrMin= 2.60D-03
 ErrMax= 2.60D-03  0.00D+00 EMaxC= 1.00D-01 BMatC= 1.33D-03 BMatP= 1.33D-03
 IDIUse=3 WtCom= 9.74D-01 WtEn= 2.60D-02
 Coeff-Com:  0.100D+01
 Coeff-En:   0.100D+01
 Coeff:      0.100D+01
 Gap=     0.806 Goal=   None    Shift=    0.000
 GapD=    0.806 DampG=2.000 DampE=1.000 DampFc=2.0000 IDamp=-1.
 RMSDP=2.36D-04 MaxDP=5.44D-03              OVMax= 1.94D-02

 Cycle   2  Pass 1  IDiag  1:
 RMSU=  2.36D-04    CP:  1.00D+00
 E= -3262.52962219447     Delta-E=       -0.002326662147 Rises=F Damp=F
 DIIS: error= 5.72D-04 at cycle   2 NSaved=   2.
 NSaved= 2 IEnMin= 2 EnMin= -3262.52962219447     IErMin= 2 ErrMin= 5.72D-04
 ErrMax= 5.72D-04  0.00D+00 EMaxC= 1.00D-01 BMatC= 3.36D-05 BMatP= 1.33D-03
 IDIUse=3 WtCom= 9.94D-01 WtEn= 5.72D-03
 Coeff-Com: -0.647D-01 0.106D+01
 Coeff-En:   0.000D+00 0.100D+01
 Coeff:     -0.643D-01 0.106D+01
 Gap=     0.129 Goal=   None    Shift=    0.000
 RMSDP=3.54D-05 MaxDP=9.80D-04 DE=-2.33D-03 OVMax= 2.21D-03

 Cycle   3  Pass 1  IDiag  1:
 RMSU=  3.37D-05    CP:  1.00D+00  1.04D+00
 E= -3262.52965115544     Delta-E=       -0.000028960966 Rises=F Damp=F
 DIIS: error= 2.45D-04 at cycle   3 NSaved=   3.
 NSaved= 3 IEnMin= 3 EnMin= -3262.52965115544     IErMin= 3 ErrMin= 2.45D-04
 ErrMax= 2.45D-04  0.00D+00 EMaxC= 1.00D-01 BMatC= 1.41D-05 BMatP= 3.36D-05
 IDIUse=3 WtCom= 9.98D-01 WtEn= 2.45D-03
 Coeff-Com: -0.335D-01 0.424D+00 0.609D+00
 Coeff-En:   0.000D+00 0.000D+00 0.100D+01
 Coeff:     -0.334D-01 0.423D+00 0.610D+00
 Gap=     0.129 Goal=   None    Shift=    0.000
 RMSDP=3.29D-05 MaxDP=1.37D-03 DE=-2.90D-05 OVMax= 1.72D-03

 Cycle   4  Pass 1  IDiag  1:
 RMSU=  1.91D-05    CP:  1.00D+00  1.06D+00  2.69D-01
 E= -3262.52965299292     Delta-E=       -0.000001837485 Rises=F Damp=F
 DIIS: error= 2.65D-04 at cycle   4 NSaved=   4.
 NSaved= 4 IEnMin= 4 EnMin= -3262.52965299292     IErMin= 3 ErrMin= 2.45D-04
 ErrMax= 2.65D-04  0.00D+00 EMaxC= 1.00D-01 BMatC= 1.15D-05 BMatP= 1.41D-05
 IDIUse=3 WtCom= 9.97D-01 WtEn= 2.65D-03
 Coeff-Com: -0.138D-01 0.163D+00 0.457D+00 0.394D+00
 Coeff-En:   0.000D+00 0.000D+00 0.461D+00 0.539D+00
 Coeff:     -0.137D-01 0.163D+00 0.457D+00 0.394D+00
 Gap=     0.129 Goal=   None    Shift=    0.000
 RMSDP=1.64D-05 MaxDP=7.08D-04 DE=-1.84D-06 OVMax= 9.59D-04

 Cycle   5  Pass 1  IDiag  1:
 RMSU=  3.17D-06    CP:  1.00D+00  1.05D+00  5.98D-01  4.42D-01
 E= -3262.52966137473     Delta-E=       -0.000008381806 Rises=F Damp=F
 DIIS: error= 2.42D-05 at cycle   5 NSaved=   5.
 NSaved= 5 IEnMin= 5 EnMin= -3262.52966137473     IErMin= 5 ErrMin= 2.42D-05
 ErrMax= 2.42D-05  0.00D+00 EMaxC= 1.00D-01 BMatC= 1.26D-07 BMatP= 1.15D-05
 IDIUse=1 WtCom= 1.00D+00 WtEn= 0.00D+00
 Coeff-Com: -0.281D-02 0.273D-01 0.139D+00 0.159D+00 0.678D+00
 Coeff:     -0.281D-02 0.273D-01 0.139D+00 0.159D+00 0.678D+00
 Gap=     0.129 Goal=   None    Shift=    0.000
 RMSDP=1.57D-06 MaxDP=5.77D-05 DE=-8.38D-06 OVMax= 1.33D-04

 Cycle   6  Pass 1  IDiag  1:
 RMSU=  1.28D-06    CP:  1.00D+00  1.05D+00  6.00D-01  4.77D-01  8.12D-01
 E= -3262.52966145217     Delta-E=       -0.000000077443 Rises=F Damp=F
 DIIS: error= 1.68D-05 at cycle   6 NSaved=   6.
 NSaved= 6 IEnMin= 6 EnMin= -3262.52966145217     IErMin= 6 ErrMin= 1.68D-05
 ErrMax= 1.68D-05  0.00D+00 EMaxC= 1.00D-01 BMatC= 5.03D-08 BMatP= 1.26D-07
 IDIUse=1 WtCom= 1.00D+00 WtEn= 0.00D+00
 Coeff-Com:  0.768D-03-0.148D-01 0.729D-02 0.315D-01 0.442D+00 0.534D+00
 Coeff:      0.768D-03-0.148D-01 0.729D-02 0.315D-01 0.442D+00 0.534D+00
 Gap=     0.129 Goal=   None    Shift=    0.000
 RMSDP=8.32D-07 MaxDP=2.78D-05 DE=-7.74D-08 OVMax= 8.73D-05

 Cycle   7  Pass 1  IDiag  1:
 RMSU=  3.79D-07    CP:  1.00D+00  1.05D+00  6.02D-01  4.83D-01  8.94D-01
                    CP:  4.76D-01
 E= -3262.52966149923     Delta-E=       -0.000000047061 Rises=F Damp=F
 DIIS: error= 3.77D-06 at cycle   7 NSaved=   7.
 NSaved= 7 IEnMin= 7 EnMin= -3262.52966149923     IErMin= 7 ErrMin= 3.77D-06
 ErrMax= 3.77D-06  0.00D+00 EMaxC= 1.00D-01 BMatC= 3.63D-09 BMatP= 5.03D-08
 IDIUse=1 WtCom= 1.00D+00 WtEn= 0.00D+00
 Coeff-Com:  0.654D-03-0.109D-01-0.534D-02 0.743D-02 0.213D+00 0.311D+00
 Coeff-Com:  0.485D+00
 Coeff:      0.654D-03-0.109D-01-0.534D-02 0.743D-02 0.213D+00 0.311D+00
 Coeff:      0.485D+00
 Gap=     0.129 Goal=   None    Shift=    0.000
 RMSDP=2.91D-07 MaxDP=1.16D-05 DE=-4.71D-08 OVMax= 2.25D-05

 Cycle   8  Pass 1  IDiag  1:
 RMSU=  1.34D-07    CP:  1.00D+00  1.05D+00  6.03D-01  4.83D-01  8.92D-01
                    CP:  5.89D-01  4.54D-01
 E= -3262.52966150271     Delta-E=       -0.000000003476 Rises=F Damp=F
 DIIS: error= 1.07D-06 at cycle   8 NSaved=   8.
 NSaved= 8 IEnMin= 8 EnMin= -3262.52966150271     IErMin= 8 ErrMin= 1.07D-06
 ErrMax= 1.07D-06  0.00D+00 EMaxC= 1.00D-01 BMatC= 3.35D-10 BMatP= 3.63D-09
 IDIUse=1 WtCom= 1.00D+00 WtEn= 0.00D+00
 Coeff-Com:  0.246D-03-0.386D-02-0.358D-02 0.265D-03 0.570D-01 0.960D-01
 Coeff-Com:  0.262D+00 0.592D+00
 Coeff:      0.246D-03-0.386D-02-0.358D-02 0.265D-03 0.570D-01 0.960D-01
 Coeff:      0.262D+00 0.592D+00
 Gap=     0.129 Goal=   None    Shift=    0.000
 RMSDP=9.66D-08 MaxDP=4.59D-06 DE=-3.48D-09 OVMax= 5.50D-06

 Cycle   9  Pass 1  IDiag  1:
 RMSU=  5.47D-08    CP:  1.00D+00  1.05D+00  6.03D-01  4.84D-01  8.96D-01
                    CP:  5.59D-01  5.97D-01  7.37D-01
 E= -3262.52966150277     Delta-E=       -0.000000000062 Rises=F Damp=F
 DIIS: error= 6.10D-07 at cycle   9 NSaved=   9.
 NSaved= 9 IEnMin= 9 EnMin= -3262.52966150277     IErMin= 9 ErrMin= 6.10D-07
 ErrMax= 6.10D-07  0.00D+00 EMaxC= 1.00D-01 BMatC= 8.63D-11 BMatP= 3.35D-10
 IDIUse=1 WtCom= 1.00D+00 WtEn= 0.00D+00
 Coeff-Com:  0.309D-04-0.323D-03-0.114D-02-0.105D-02-0.424D-02 0.263D-02
 Coeff-Com:  0.778D-01 0.377D+00 0.549D+00
 Coeff:      0.309D-04-0.323D-03-0.114D-02-0.105D-02-0.424D-02 0.263D-02
 Coeff:      0.778D-01 0.377D+00 0.549D+00
 Gap=     0.129 Goal=   None    Shift=    0.000
 RMSDP=3.73D-08 MaxDP=1.24D-06 DE=-6.18D-11 OVMax= 2.32D-06

 Cycle  10  Pass 1  IDiag  1:
 RMSU=  1.76D-08    CP:  1.00D+00  1.05D+00  6.03D-01  4.84D-01  8.96D-01
                    CP:  5.69D-01  5.74D-01  8.83D-01  6.07D-01
 E= -3262.52966150286     Delta-E=       -0.000000000095 Rises=F Damp=F
 DIIS: error= 2.06D-07 at cycle  10 NSaved=  10.
 NSaved=10 IEnMin=10 EnMin= -3262.52966150286     IErMin=10 ErrMin= 2.06D-07
 ErrMax= 2.06D-07  0.00D+00 EMaxC= 1.00D-01 BMatC= 1.15D-11 BMatP= 8.63D-11
 IDIUse=1 WtCom= 1.00D+00 WtEn= 0.00D+00
 Coeff-Com: -0.616D-05 0.213D-03-0.318D-03-0.665D-03-0.862D-02-0.817D-02
 Coeff-Com:  0.219D-01 0.174D+00 0.344D+00 0.477D+00
 Coeff:     -0.616D-05 0.213D-03-0.318D-03-0.665D-03-0.862D-02-0.817D-02
 Coeff:      0.219D-01 0.174D+00 0.344D+00 0.477D+00
 Gap=     0.129 Goal=   None    Shift=    0.000
 RMSDP=1.19D-08 MaxDP=3.78D-07 DE=-9.55D-11 OVMax= 8.63D-07

 Cycle  11  Pass 1  IDiag  1:
 RMSU=  4.77D-09    CP:  1.00D+00  1.05D+00  6.03D-01  4.84D-01  8.96D-01
                    CP:  5.69D-01  5.88D-01  8.71D-01  6.78D-01  5.94D-01
 E= -3262.52966150293     Delta-E=       -0.000000000065 Rises=F Damp=F
 DIIS: error= 3.39D-08 at cycle  11 NSaved=  11.
 NSaved=11 IEnMin=11 EnMin= -3262.52966150293     IErMin=11 ErrMin= 3.39D-08
 ErrMax= 3.39D-08  0.00D+00 EMaxC= 1.00D-01 BMatC= 3.29D-13 BMatP= 1.15D-11
 IDIUse=1 WtCom= 1.00D+00 WtEn= 0.00D+00
 Coeff-Com: -0.483D-05 0.123D-03-0.810D-04-0.270D-03-0.382D-02-0.401D-02
 Coeff-Com:  0.544D-02 0.599D-01 0.126D+00 0.213D+00 0.603D+00
 Coeff:     -0.483D-05 0.123D-03-0.810D-04-0.270D-03-0.382D-02-0.401D-02
 Coeff:      0.544D-02 0.599D-01 0.126D+00 0.213D+00 0.603D+00
 Gap=     0.129 Goal=   None    Shift=    0.000
 RMSDP=2.91D-09 MaxDP=7.05D-08 DE=-6.46D-11 OVMax= 3.51D-07

 Error on total polarization charges =  0.01376
 SCF Done:  E(RB3LYP) =  -3262.52966150     A.U. after   11 cycles
            NFock= 11  Conv=0.29D-08     -V/T= 2.0018
 KE= 3.256606208761D+03 PE=-1.050328474139D+04 EE= 2.610556487014D+03
 Leave Link  502 at Sun Jan 12 20:32:07 2020, MaxMem=   134217728 cpu:       682.0
 (Enter E:\Gaussian\G09W\l801.exe)
 DoSCS=F DFT=T ScalE2(SS,OS)=  1.000000  1.000000
 ExpMin= 1.03D-01 ExpMax= 4.40D+05 ExpMxC= 1.51D+04 IAcc=3 IRadAn=         5 AccDes= 0.00D+00
 HarFok:  IExCor=  205 AccDes= 0.00D+00 IRadAn=         5 IDoV=-2 UseB2=F ITyADJ=14
 ICtDFT= 12500011 ScaDFX=  1.000000  1.000000  1.000000  1.000000
 Largest valence mixing into a core orbital is  2.38D-04
 Largest core mixing into a valence orbital is  1.99D-05
 Range of M.O.s used for correlation:    31   353
 NBasis=   353 NAE=    71 NBE=    71 NFC=    30 NFV=     0
 NROrb=    323 NOA=    41 NOB=    41 NVA=   282 NVB=   282

 **** Warning!!: The largest alpha MO coefficient is  0.26056943D+02

 Leave Link  801 at Sun Jan 12 20:32:09 2020, MaxMem=   134217728 cpu:         1.0
 (Enter E:\Gaussian\G09W\l914.exe)
 RHF ground state
 MDV=   134217728 DFT=T DoStab=F Mixed=T DoRPA=T DoScal=F NonHer=T
 NEqPCM:  Using equilibrium solvation (IEInf=0, Eps=  35.6880, EpsInf=   1.8069)
 Making orbital integer symmetry assigments:
 Orbital symmetries:
       Occupied  (A) (A) (A) (A) (A) (A) (A) (A) (A) (A) (A) (A)
                 (A) (A) (A) (A) (A) (A) (A) (A) (A) (A) (A) (A)
                 (A) (A) (A) (A) (A) (A) (A) (A) (A) (A) (A) (A)
                 (A) (A) (A) (A) (A) (A) (A) (A) (A) (A) (A) (A)
                 (A) (A) (A) (A) (A) (A) (A) (A) (A) (A) (A) (A)
                 (A) (A) (A) (A) (A) (A) (A) (A) (A) (A) (A)
       Virtual   (A) (A) (A) (A) (A) (A) (A) (A) (A) (A) (A) (A)
                 (A) (A) (A) (A) (A) (A) (A) (A) (A) (A) (A) (A)
                 (A) (A) (A) (A) (A) (A) (A) (A) (A) (A) (A) (A)
                 (A) (A) (A) (A) (A) (A) (A) (A) (A) (A) (A) (A)
                 (A) (A) (A) (A) (A) (A) (A) (A) (A) (A) (A) (A)
                 (A) (A) (A) (A) (A) (A) (A) (A) (A) (A) (A) (A)
                 (A) (A) (A) (A) (A) (A) (A) (A) (A) (A) (A) (A)
                 (A) (A) (A) (A) (A) (A) (A) (A) (A) (A) (A) (A)
                 (A) (A) (A) (A) (A) (A) (A) (A) (A) (A) (A) (A)
                 (A) (A) (A) (A) (A) (A) (A) (A) (A) (A) (A) (A)
                 (A) (A) (A) (A) (A) (A) (A) (A) (A) (A) (A) (A)
                 (A) (A) (A) (A) (A) (A) (A) (A) (A) (A) (A) (A)
                 (A) (A) (A) (A) (A) (A) (A) (A) (A) (A) (A) (A)
                 (A) (A) (A) (A) (A) (A) (A) (A) (A) (A) (A) (A)
                 (A) (A) (A) (A) (A) (A) (A) (A) (A) (A) (A) (A)
                 (A) (A) (A) (A) (A) (A) (A) (A) (A) (A) (A) (A)
                 (A) (A) (A) (A) (A) (A) (A) (A) (A) (A) (A) (A)
                 (A) (A) (A) (A) (A) (A) (A) (A) (A) (A) (A) (A)
                 (A) (A) (A) (A) (A) (A) (A) (A) (A) (A) (A) (A)
                 (A) (A) (A) (A) (A) (A) (A) (A) (A) (A) (A) (A)
                 (A) (A) (A) (A) (A) (A) (A) (A) (A) (A) (A) (A)
                 (A) (A) (A) (A) (A) (A) (A) (A) (A) (A) (A) (A)
                 (A) (A) (A) (A) (A) (A) (A) (A) (A) (A) (A) (A)
                 (A) (A) (A) (A) (A) (A)
 Generating guess from densities on rwf.
 Convergence on wavefunction:    0.000001000000000
 Davidson Disk Diagonalization:  ConvIn= 1.00D-06 SkipCon=T Conv= 1.00D-06.
 Max sub-space:   200 roots to seek:     5 dimension of matrix:        23124
 Iteration     1 Dimension    10 NMult     0 NNew     10
 CISAX will form    10 AO SS matrices at one time.
 NMat=    10 NSing=     0 JSym2X= 0.
 FoFJK:  IHMeth= 1 ICntrl=       0 DoSepK=F KAlg= 0 I1Cent=   0 FoldK=F
 IRaf=         0 NMat=  20 IRICut=       1 DoRegI=T DoRafI=F ISym2E= 0.
 FoFCou: FMM=F IPFlag=           0 FMFlag=      100000 FMFlg1=           0
         NFxFlg=           0 DoJE=F BraDBF=F KetDBF=F FulRan=T
         wScrn=  0.000000 ICntrl=       0 IOpCl=  0 I1Cent=           0 NGrid=           0
         NMat0=   20 NMatS0=      0 NMatT0=   10 NMatD0=   20 NMtDS0=    0 NMtDT0=    0
 Symmetry not used in FoFCou.
 Excitation Energies [eV] at current iteration:
 Root      1 :     2.082333110393568
 Root      2 :     2.314856512005935
 Root      3 :     2.565501577391288
 Root      4 :     2.587428261213389
 Root      5 :     2.778770725853982
 Iteration     2 Dimension    20 NMult    10 NNew     10
 CISAX will form    10 AO SS matrices at one time.
 NMat=    10 NSing=     0 JSym2X= 0.
 Root      1 not converged, maximum delta is    0.011251145771997
 Root      2 not converged, maximum delta is    0.007147475908456
 Root      3 not converged, maximum delta is    0.013894158676955
 Root      4 not converged, maximum delta is    0.012155798998127
 Root      5 not converged, maximum delta is    0.010767255553754
 Excitation Energies [eV] at current iteration:
 Root      1 :     2.077357890600044   Change is   -0.004975219793524
 Root      2 :     2.312300865125840   Change is   -0.002555646880095
 Root      3 :     2.562778429401426   Change is   -0.002723147989862
 Root      4 :     2.582771468567752   Change is   -0.004656792645637
 Root      5 :     2.774481782804016   Change is   -0.004288943049966
 Iteration     3 Dimension    30 NMult    20 NNew     10
 CISAX will form    10 AO SS matrices at one time.
 NMat=    10 NSing=     0 JSym2X= 0.
 Root      1 not converged, maximum delta is    0.001451173788766
 Root      2 not converged, maximum delta is    0.005999008736298
 Root      3 not converged, maximum delta is    0.008375655155725
 Root      4 not converged, maximum delta is    0.001494278333520
 Root      5 not converged, maximum delta is    0.001936096776169
 Excitation Energies [eV] at current iteration:
 Root      1 :     2.077225932248560   Change is   -0.000131958351485
 Root      2 :     2.312167637358347   Change is   -0.000133227767493
 Root      3 :     2.562588413088181   Change is   -0.000190016313244
 Root      4 :     2.582642408754787   Change is   -0.000129059812965
 Root      5 :     2.774382465113651   Change is   -0.000099317690365
 Iteration     4 Dimension    40 NMult    30 NNew     10
 CISAX will form    10 AO SS matrices at one time.
 NMat=    10 NSing=     0 JSym2X= 0.
 Root      1 not converged, maximum delta is    0.000192836229493
 Root      2 not converged, maximum delta is    0.000954169865684
 Root      3 not converged, maximum delta is    0.001993407457239
 Root      4 not converged, maximum delta is    0.000314281714590
 Root      5 not converged, maximum delta is    0.000185138768961
 Excitation Energies [eV] at current iteration:
 Root      1 :     2.077222853262394   Change is   -0.000003078986165
 Root      2 :     2.312155708035693   Change is   -0.000011929322653
 Root      3 :     2.562561891578642   Change is   -0.000026521509539
 Root      4 :     2.582638104036036   Change is   -0.000004304718751
 Root      5 :     2.774379986811228   Change is   -0.000002478302423
 Iteration     5 Dimension    50 NMult    40 NNew     10
 CISAX will form    10 AO SS matrices at one time.
 NMat=    10 NSing=     0 JSym2X= 0.
 Root      1 not converged, maximum delta is    0.000046361564738
 Root      2 not converged, maximum delta is    0.000058056544852
 Root      3 not converged, maximum delta is    0.000089615927289
 Root      4 not converged, maximum delta is    0.000092351644081
 Root      5 not converged, maximum delta is    0.000057338110171
 Excitation Energies [eV] at current iteration:
 Root      1 :     2.077222672392344   Change is   -0.000000180870051
 Root      2 :     2.312155267909046   Change is   -0.000000440126647
 Root      3 :     2.562560866036673   Change is   -0.000001025541970
 Root      4 :     2.582637768086391   Change is   -0.000000335949645
 Root      5 :     2.774379843159233   Change is   -0.000000143651995
 Iteration     6 Dimension    60 NMult    50 NNew     10
 CISAX will form    10 AO SS matrices at one time.
 NMat=    10 NSing=     0 JSym2X= 0.
 Root      1 not converged, maximum delta is    0.000014020817377
 Root      2 not converged, maximum delta is    0.000012843970945
 Root      3 not converged, maximum delta is    0.000033189775783
 Root      4 not converged, maximum delta is    0.000022521719047
 Root      5 not converged, maximum delta is    0.000018687165723
 Excitation Energies [eV] at current iteration:
 Root      1 :     2.077222657315749   Change is   -0.000000015076594
 Root      2 :     2.312155249357956   Change is   -0.000000018551090
 Root      3 :     2.562560802280833   Change is   -0.000000063755839
 Root      4 :     2.582637732545740   Change is   -0.000000035540652
 Root      5 :     2.774379824123896   Change is   -0.000000019035337
 Iteration     7 Dimension    70 NMult    60 NNew     10
 CISAX will form    10 AO SS matrices at one time.
 NMat=    10 NSing=     0 JSym2X= 0.
 Root      1 not converged, maximum delta is    0.000002094622357
 Root      2 not converged, maximum delta is    0.000001815696471
 Root      3 not converged, maximum delta is    0.000003874518152
 Root      4 not converged, maximum delta is    0.000003230578042
 Root      5 not converged, maximum delta is    0.000002328160029
 Excitation Energies [eV] at current iteration:
 Root      1 :     2.077222656766320   Change is   -0.000000000549429
 Root      2 :     2.312155248455867   Change is   -0.000000000902089
 Root      3 :     2.562560798860730   Change is   -0.000000003420104
 Root      4 :     2.582637730835755   Change is   -0.000000001709984
 Root      5 :     2.774379823096028   Change is   -0.000000001027868
 Iteration     8 Dimension    80 NMult    70 NNew     10
 CISAX will form    10 AO SS matrices at one time.
 NMat=    10 NSing=     0 JSym2X= 0.
 Root      1 has converged.
 Root      2 has converged.
 Root      3 has converged.
 Root      4 has converged.
 Root      5 has converged.
 Excitation Energies [eV] at current iteration:
 Root      1 :     2.077222656734976   Change is   -0.000000000031344
 Root      2 :     2.312155248419566   Change is   -0.000000000036301
 Root      3 :     2.562560798687561   Change is   -0.000000000173169
 Root      4 :     2.582637730746120   Change is   -0.000000000089636
 Root      5 :     2.774379823037803   Change is   -0.000000000058225
 Convergence achieved on expansion vectors.
 ***********************************************************************
 Excited states from <AA,BB:AA,BB> singles matrix:
 ***********************************************************************
 
 1PDM for each excited state written to RWF  633
 Ground to excited state transition densities written to RWF  633
 Ground to excited state transition electric dipole moments (Au):
       state          X           Y           Z        Dip. S.      Osc.
         1         0.0000      0.0000      0.0000      0.0000      0.0000
         2         0.0000      0.0000      0.0000      0.0000      0.0000
         3         0.0000      0.0000      0.0000      0.0000      0.0000
         4         0.0000      0.0000      0.0000      0.0000      0.0000
         5         0.0000      0.0000      0.0000      0.0000      0.0000
 Ground to excited state transition velocity dipole moments (Au):
       state          X           Y           Z        Dip. S.      Osc.
         1         0.0000      0.0000      0.0000      0.0000      0.0000
         2         0.0000      0.0000      0.0000      0.0000      0.0000
         3         0.0000      0.0000      0.0000      0.0000      0.0000
         4         0.0000      0.0000      0.0000      0.0000      0.0000
         5         0.0000      0.0000      0.0000      0.0000      0.0000
 Ground to excited state transition magnetic dipole moments (Au):
       state          X           Y           Z
         1         0.0000      0.0000      0.0000
         2         0.0000      0.0000      0.0000
         3         0.0000      0.0000      0.0000
         4         0.0000      0.0000      0.0000
         5         0.0000      0.0000      0.0000
 Ground to excited state transition velocity quadrupole moments (Au):
       state          XX          YY          ZZ          XY          XZ          YZ
         1         0.0000      0.0000      0.0000      0.0000      0.0000      0.0000
         2         0.0000      0.0000      0.0000      0.0000      0.0000      0.0000
         3         0.0000      0.0000      0.0000      0.0000      0.0000      0.0000
         4         0.0000      0.0000      0.0000      0.0000      0.0000      0.0000
         5         0.0000      0.0000      0.0000      0.0000      0.0000      0.0000
 <0|del|b> * <b|rxdel|0> + <0|del|b> * <b|delr+rdel|0>
 Rotatory Strengths (R) in cgs (10**-40 erg-esu-cm/Gauss)
       state          XX          YY          ZZ    R(velocity)    E-M Angle
         1         0.0000      0.0000      0.0000      0.0000       90.00
         2         0.0000      0.0000      0.0000      0.0000       90.00
         3         0.0000      0.0000      0.0000      0.0000       90.00
         4         0.0000      0.0000      0.0000      0.0000       90.00
         5         0.0000      0.0000      0.0000      0.0000       90.00
 1/2[<0|r|b>*<b|rxdel|0> + (<0|rxdel|b>*<b|r|0>)*]
 Rotatory Strengths (R) in cgs (10**-40 erg-esu-cm/Gauss)
       state          XX          YY          ZZ     R(length)
         1         0.0000      0.0000      0.0000      0.0000
         2         0.0000      0.0000      0.0000      0.0000
         3         0.0000      0.0000      0.0000      0.0000
         4         0.0000      0.0000      0.0000      0.0000
         5         0.0000      0.0000      0.0000      0.0000
  1/2[<0|del|b>*<b|r|0> + (<0|r|b>*<b|del|0>)*] (Au)
       state          X           Y           Z        Dip. S.   Osc.(frdel)
         1         0.0000      0.0000      0.0000      0.0000      0.0000
         2         0.0000      0.0000      0.0000      0.0000      0.0000
         3         0.0000      0.0000      0.0000      0.0000      0.0000
         4         0.0000      0.0000      0.0000      0.0000      0.0000
         5         0.0000      0.0000      0.0000      0.0000      0.0000

 Excitation energies and oscillator strengths:
 
 Excited State   1:      Triplet-A      2.0772 eV  596.87 nm  f=0.0000  <S**2>=2.000
      64 -> 72        -0.15349
      66 -> 72         0.11551
      68 -> 72         0.14011
      71 -> 72         0.63762
      71 -> 74         0.12878
 This state for optimization and/or second-order correction.
 Total Energy, E(TD-HF/TD-KS) =  -3262.45332497    
 Copying the excited state density for this state as the 1-particle RhoCI density.
 
 Excited State   2:      Triplet-A      2.3122 eV  536.23 nm  f=0.0000  <S**2>=2.000
      70 -> 72         0.68161
 
 Excited State   3:      Triplet-A      2.5626 eV  483.83 nm  f=0.0000  <S**2>=2.000
      67 -> 72        -0.66050
      67 -> 73         0.12500
      68 -> 72        -0.11319
      70 -> 73        -0.12204
 
 Excited State   4:      Triplet-A      2.5826 eV  480.07 nm  f=0.0000  <S**2>=2.000
      66 -> 72         0.15158
      67 -> 72        -0.11747
      68 -> 72         0.54245
      68 -> 74        -0.13138
      69 -> 72        -0.24704
      69 -> 73        -0.12260
      71 -> 72        -0.21099
 
 Excited State   5:      Triplet-A      2.7744 eV  446.89 nm  f=0.0000  <S**2>=2.000
      66 -> 72         0.24453
      68 -> 72         0.17516
      69 -> 72         0.61358
 SavETr:  write IOETrn=   770 NScale= 10 NData=  16 NLR=1 NState=    5 LETran=      96.
 The selected state is a triplet
 CISAX will form     1 AO SS matrices at one time.
 NMat=     1 NSing=     0 JSym2X= 0.
 CISAX will form     1 AO SS matrices at one time.
 NMat=     1 NSing=     0 JSym2X= 0.
 Leave Link  914 at Sun Jan 12 21:26:58 2020, MaxMem=   134217728 cpu:      3288.0
 (Enter E:\Gaussian\G09W\l1002.exe)
 Minotr:  Closed shell wavefunction.
          Computing CIS/TD-HF/TD-KS derivatives.
          Using Z-Vector for PSCF gradient.
          Skipping F1 and S1 gradient terms here.
          IDoAtm=111111111111111111111111
 NEqPCM:  Using equilibrium solvation (IEInf=0, Eps=  35.6880, EpsInf=   1.8069)
          Frozen-core window.
          Direct CPHF calculation.
          Differentiating once with respect to electric field.
                with respect to dipole field.
          Differentiating once with respect to nuclear coordinates.
          Requested convergence is 1.0D-10 RMS, and 1.0D-09 maximum.
          NewPWx=F KeepS1=T KeepF1=T KeepIn=T MapXYZ=F SortEE=F KeepMc=T.
          MDV=     134217394 using IRadAn=       0.
 Using stored XC quadrature information.
          Solving linear equations separately, MaxMat=       0.
          There are     1 degrees of freedom in the 1st order CPHF.  IDoFFX=0 NUNeed=     1.
 FoFJK:  IHMeth= 1 ICntrl=       0 DoSepK=F KAlg= 0 I1Cent=   0 FoldK=F
 IRaf= 800000000 NMat=   1 IRICut=       1 DoRegI=T DoRafI=F ISym2E=-1.
 FoFCou: FMM=F IPFlag=           0 FMFlag=      100000 FMFlg1=           0
         NFxFlg=           0 DoJE=F BraDBF=F KetDBF=F FulRan=T
         wScrn=  0.000000 ICntrl=       0 IOpCl=  0 I1Cent=           0 NGrid=           0
         NMat0=    1 NMatS0=      1 NMatT0=    0 NMatD0=    1 NMtDS0=    0 NMtDT0=    0
 Petite list used in FoFCou.
 LinEq1:  Iter=  0 NonCon=     1 RMS=3.46D-03 Max=1.85D-01 NDo=     1
 AX will form     1 AO Fock derivatives at one time.
 LinEq1:  Iter=  1 NonCon=     1 RMS=2.38D-03 Max=1.23D-01 NDo=     1
 LinEq1:  Iter=  2 NonCon=     1 RMS=1.84D-03 Max=7.79D-02 NDo=     1
 LinEq1:  Iter=  3 NonCon=     1 RMS=1.01D-03 Max=4.63D-02 NDo=     1
 LinEq1:  Iter=  4 NonCon=     1 RMS=6.22D-04 Max=3.86D-02 NDo=     1
 LinEq1:  Iter=  5 NonCon=     1 RMS=4.13D-04 Max=1.54D-02 NDo=     1
 LinEq1:  Iter=  6 NonCon=     1 RMS=2.83D-04 Max=1.08D-02 NDo=     1
 LinEq1:  Iter=  7 NonCon=     1 RMS=1.97D-04 Max=8.18D-03 NDo=     1
 LinEq1:  Iter=  8 NonCon=     1 RMS=1.23D-04 Max=6.56D-03 NDo=     1
 LinEq1:  Iter=  9 NonCon=     1 RMS=9.77D-05 Max=3.51D-03 NDo=     1
 LinEq1:  Iter= 10 NonCon=     1 RMS=6.40D-05 Max=2.23D-03 NDo=     1
 LinEq1:  Iter= 11 NonCon=     1 RMS=4.00D-05 Max=1.73D-03 NDo=     1
 LinEq1:  Iter= 12 NonCon=     1 RMS=1.91D-05 Max=8.47D-04 NDo=     1
 LinEq1:  Iter= 13 NonCon=     1 RMS=1.03D-05 Max=4.64D-04 NDo=     1
 LinEq1:  Iter= 14 NonCon=     1 RMS=4.58D-06 Max=1.48D-04 NDo=     1
 LinEq1:  Iter= 15 NonCon=     1 RMS=2.57D-06 Max=7.23D-05 NDo=     1
 LinEq1:  Iter= 16 NonCon=     1 RMS=9.73D-07 Max=3.51D-05 NDo=     1
 LinEq1:  Iter= 17 NonCon=     1 RMS=6.62D-07 Max=1.77D-05 NDo=     1
 LinEq1:  Iter= 18 NonCon=     1 RMS=3.31D-07 Max=1.35D-05 NDo=     1
 LinEq1:  Iter= 19 NonCon=     1 RMS=1.59D-07 Max=3.44D-06 NDo=     1
 LinEq1:  Iter= 20 NonCon=     1 RMS=6.43D-08 Max=1.93D-06 NDo=     1
 LinEq1:  Iter= 21 NonCon=     1 RMS=3.44D-08 Max=1.48D-06 NDo=     1
 LinEq1:  Iter= 22 NonCon=     1 RMS=1.75D-08 Max=7.66D-07 NDo=     1
 LinEq1:  Iter= 23 NonCon=     1 RMS=1.18D-08 Max=5.10D-07 NDo=     1
 LinEq1:  Iter= 24 NonCon=     1 RMS=5.42D-09 Max=2.27D-07 NDo=     1
 LinEq1:  Iter= 25 NonCon=     1 RMS=3.21D-09 Max=1.04D-07 NDo=     1
 LinEq1:  Iter= 26 NonCon=     1 RMS=1.37D-09 Max=3.81D-08 NDo=     1
 LinEq1:  Iter= 27 NonCon=     1 RMS=4.00D-10 Max=1.06D-08 NDo=     1
 LinEq1:  Iter= 28 NonCon=     1 RMS=1.77D-10 Max=4.04D-09 NDo=     1
 LinEq1:  Iter= 29 NonCon=     1 RMS=1.06D-10 Max=3.52D-09 NDo=     1
 LinEq1:  Iter= 30 NonCon=     0 RMS=2.25D-11 Max=6.85D-10 NDo=     1
 Linear equations converged to 1.000D-10 1.000D-09 after    30 iterations.
 End of Minotr F.D. properties file   721 does not exist.
 End of Minotr F.D. properties file   722 does not exist.
 End of Minotr F.D. properties file   788 does not exist.
 Leave Link 1002 at Sun Jan 12 22:05:13 2020, MaxMem=   134217728 cpu:      2294.0
 (Enter E:\Gaussian\G09W\l701.exe)
 Compute integral first derivatives.
 ... and contract with generalized density number  6.
 R6Disp: Adding Grimme-D3(BJ) dispersion energy 1st derivatives to the gradient.
 D1PCM: PCM CHGder 1st derivatives, ID1Alg=3 FixD1E=F DoIter=F DoCFld=F I1PDM=6.
 GePol: Maximum number of non-zero 1st derivatives   =     350
 Leave Link  701 at Sun Jan 12 22:06:09 2020, MaxMem=   134217728 cpu:        56.0
 (Enter E:\Gaussian\G09W\l702.exe)
 L702 exits ... SP integral derivatives will be done elsewhere.
 Leave Link  702 at Sun Jan 12 22:06:10 2020, MaxMem=   134217728 cpu:         0.0
 (Enter E:\Gaussian\G09W\l703.exe)
 Compute integral first derivatives, UseDBF=F ICtDFT=           0.
 Integral derivatives from FoFJK, PRISM(SPDF).
 Calling FoFJK, ICntrl=  10005127 FMM=F ISym2X=0 I1Cent= 0 IOpClX= 0 NMat=1 NMatS=1 NMatT=0.
 FoFJK:  IHMeth= 1 ICntrl=10005127 DoSepK=F KAlg= 0 I1Cent=   0 FoldK=F
 IRaf=         0 NMat=   1 IRICut=       1 DoRegI=T DoRafI=F ISym2E= 0.
 FoFCou: FMM=F IPFlag=           0 FMFlag=      100000 FMFlg1=         800
         NFxFlg=           0 DoJE=F BraDBF=F KetDBF=F FulRan=T
         wScrn=  0.000000 ICntrl=10005127 IOpCl=  0 I1Cent=           0 NGrid=           0
         NMat0=    1 NMatS0=      1 NMatT0=    0 NMatD0=    1 NMtDS0=    0 NMtDT0=    0
 Symmetry not used in FoFCou.
 Leave Link  703 at Sun Jan 12 22:09:55 2020, MaxMem=   134217728 cpu:       225.0
 (Enter E:\Gaussian\G09W\l716.exe)
 Dipole        =-1.38411794D+00 5.00244716D-01-9.33106800D-03
 ***** Axes restored to original set *****
 -------------------------------------------------------------------
 Center     Atomic                   Forces (Hartrees/Bohr)
 Number     Number              X              Y              Z
 -------------------------------------------------------------------
      1        6          -0.000344201   -0.000121181    0.000110482
      2        6           0.000077087    0.000035836    0.000056578
      3        6           0.001107319   -0.000537533   -0.000943345
      4        6           0.000478670    0.000420347   -0.000709711
      5        6           0.000092366   -0.000718408   -0.000062489
      6        6          -0.000133672    0.000077259    0.000220803
      7        1          -0.000074153    0.000109849   -0.000046336
      8        1          -0.000117127    0.000056356    0.000152360
      9        1          -0.000337072   -0.000153964    0.000172443
     10        1          -0.000013062   -0.000128787   -0.000122038
     11        6          -0.000573789    0.003032579    0.001365265
     12        8           0.000446195   -0.002357751   -0.000696783
     13        6          -0.000716028    0.000574647    0.001279193
     14        6          -0.000733011    0.001009310    0.001387851
     15        6          -0.000362315   -0.001678327   -0.001830534
     16        6           0.000429812   -0.000607694   -0.000602286
     17        6          -0.000013824   -0.000162107    0.000579956
     18        6           0.000030861    0.000900413    0.000221131
     19        1           0.000301053   -0.000045120   -0.000059465
     20        6           0.000591333   -0.000833925    0.000070626
     21        1           0.000028718    0.000136925    0.000000266
     22        1          -0.000003596    0.000188988   -0.000232805
     23       35          -0.000090408   -0.000050190   -0.000025220
     24        8          -0.000071154    0.000852479   -0.000285944
 -------------------------------------------------------------------
 Cartesian Forces:  Max     0.003032579 RMS     0.000730719
 Leave Link  716 at Sun Jan 12 22:09:56 2020, MaxMem=   134217728 cpu:         0.0
 (Enter E:\Gaussian\G09W\l103.exe)

 GradGradGradGradGradGradGradGradGradGradGradGradGradGradGradGradGradGrad
 Berny optimization.
 Using GEDIIS/GDIIS optimizer.
 FormGI is forming the generalized inverse of G from B-inverse, IUseBI=4.
 Internal  Forces:  Max     0.002404436 RMS     0.000342112
 Search for a local minimum.
 Step number   4 out of a maximum of  142
 All quantities printed in internal units (Hartrees-Bohrs-Radians)
 RMS Force = .34211D-03 SwitMx=.10000D-02 MixMth= 2
 Mixed Optimization -- En-DIIS/RFO-DIIS
 Swapping is turned off.
 Update second derivatives using D2CorX and points    1    2    3    4
 DE= -2.18D-04 DEPred=-2.47D-04 R= 8.83D-01
 TightC=F SS=  1.41D+00  RLast= 1.42D-01 DXNew= 8.4853D-01 4.2748D-01
 Trust test= 8.83D-01 RLast= 1.42D-01 DXMaxT set to 5.05D-01
 ITU=  1  0  1  0
     Eigenvalues ---    0.00549   0.01386   0.01505   0.01561   0.01639
     Eigenvalues ---    0.01706   0.01740   0.01787   0.01899   0.01927
     Eigenvalues ---    0.02027   0.02079   0.02085   0.02123   0.02152
     Eigenvalues ---    0.02160   0.02176   0.02186   0.02230   0.02263
     Eigenvalues ---    0.04243   0.15938   0.15999   0.16000   0.16000
     Eigenvalues ---    0.16000   0.16018   0.16092   0.19548   0.22006
     Eigenvalues ---    0.22468   0.22584   0.23570   0.24499   0.24530
     Eigenvalues ---    0.24837   0.24994   0.24997   0.25000   0.25025
     Eigenvalues ---    0.25200   0.33357   0.34667   0.35360   0.35421
     Eigenvalues ---    0.35433   0.35584   0.35606   0.35705   0.35721
     Eigenvalues ---    0.35813   0.36538   0.37508   0.38385   0.38871
     Eigenvalues ---    0.39847   0.41360   0.43559   0.43820   0.44465
     Eigenvalues ---    0.46970   0.47390   0.48404   0.52222   0.76622
     Eigenvalues ---    0.85513
 En-DIIS/RFO-DIIS IScMMF=        0 using points:     4    3    2
 RFO step:  Lambda=-2.87521149D-05.
 NNeg= 0 NP= 3 Switch=  2.50D-03 Rises=F DC=  2.10D-04 SmlDif=  1.00D-05
 RMS Error=  0.8134491747D-03 NUsed= 3 EDIIS=F
 DidBck=F Rises=F RFO-DIIS coefs:    0.82562    0.10308    0.07130
 Iteration  1 RMS(Cart)=  0.00472400 RMS(Int)=  0.00002818
 Iteration  2 RMS(Cart)=  0.00002941 RMS(Int)=  0.00002405
 Iteration  3 RMS(Cart)=  0.00000000 RMS(Int)=  0.00002405
 ITry= 1 IFail=0 DXMaxC= 2.92D-02 DCOld= 1.00D+10 DXMaxT= 5.05D-01 DXLimC= 3.00D+00 Rises=F
 Variable       Old X    -DE/DX   Delta X   Delta X   Delta X     New X
                                 (Linear)    (Quad)   (Total)
    R1        2.61438   0.00033  -0.00031   0.00093   0.00062   2.61499
    R2        2.65249   0.00012   0.00018  -0.00001   0.00016   2.65265
    R3        2.04892   0.00011  -0.00005   0.00031   0.00026   2.04918
    R4        2.65380   0.00037   0.00016   0.00050   0.00066   2.65447
    R5        2.04583   0.00008   0.00007   0.00010   0.00017   2.04600
    R6        2.67416  -0.00002   0.00004  -0.00006  -0.00001   2.67414
    R7        2.77062   0.00011  -0.00052   0.00100   0.00046   2.77108
    R8        2.65377   0.00088  -0.00004   0.00175   0.00172   2.65549
    R9        2.78658  -0.00046  -0.00062  -0.00041  -0.00100   2.78558
   R10        2.61209   0.00023  -0.00015   0.00060   0.00045   2.61254
   R11        2.04645   0.00007  -0.00008   0.00027   0.00019   2.04664
   R12        2.04853   0.00009  -0.00002   0.00024   0.00022   2.04875
   R13        2.34095   0.00240   0.00034   0.00193   0.00227   2.34322
   R14        2.76763  -0.00039  -0.00020  -0.00072  -0.00090   2.76674
   R15        2.69585   0.00066   0.00058   0.00079   0.00135   2.69720
   R16        2.40090   0.00085  -0.00075   0.00185   0.00110   2.40199
   R17        2.79157  -0.00074  -0.00124  -0.00013  -0.00136   2.79021
   R18        2.60818   0.00096  -0.00026   0.00198   0.00173   2.60991
   R19        2.72440   0.00036   0.00014   0.00064   0.00079   2.72518
   R20        2.64121   0.00015   0.00055  -0.00031   0.00024   2.64145
   R21        2.04494   0.00011  -0.00012   0.00040   0.00028   2.04523
   R22        2.56071   0.00039   0.00016   0.00040   0.00055   2.56126
   R23        2.04305   0.00012   0.00002   0.00025   0.00027   2.04332
   R24        2.74599  -0.00074  -0.00098  -0.00038  -0.00137   2.74463
   R25        3.54013  -0.00007  -0.00016  -0.00012  -0.00028   3.53985
   R26        2.04396   0.00012  -0.00003   0.00031   0.00028   2.04425
    A1        2.09839  -0.00004  -0.00016   0.00000  -0.00016   2.09823
    A2        2.09289  -0.00007  -0.00004  -0.00032  -0.00036   2.09253
    A3        2.09190   0.00011   0.00020   0.00032   0.00052   2.09242
    A4        2.10429   0.00022   0.00000   0.00076   0.00077   2.10506
    A5        2.11265  -0.00022  -0.00017  -0.00072  -0.00090   2.11175
    A6        2.06624  -0.00001   0.00017  -0.00003   0.00013   2.06637
    A7        2.08154  -0.00024   0.00013  -0.00105  -0.00092   2.08062
    A8        2.08132  -0.00015  -0.00022  -0.00022  -0.00047   2.08084
    A9        2.12030   0.00038   0.00009   0.00131   0.00142   2.12173
   A10        2.08202   0.00016  -0.00017   0.00087   0.00068   2.08270
   A11        2.12832  -0.00015   0.00003  -0.00072  -0.00062   2.12770
   A12        2.07282   0.00000   0.00013  -0.00010  -0.00004   2.07278
   A13        2.10794  -0.00015   0.00000  -0.00049  -0.00048   2.10746
   A14        2.05910   0.00045   0.00012   0.00209   0.00220   2.06130
   A15        2.11614  -0.00030  -0.00012  -0.00158  -0.00171   2.11442
   A16        2.09218   0.00004   0.00018  -0.00006   0.00012   2.09229
   A17        2.09382   0.00007   0.00002   0.00033   0.00035   2.09418
   A18        2.09719  -0.00011  -0.00020  -0.00027  -0.00047   2.09672
   A19        2.13540  -0.00013   0.00015  -0.00055  -0.00040   2.13500
   A20        2.03201   0.00022  -0.00037   0.00084   0.00065   2.03266
   A21        2.11567  -0.00008   0.00003  -0.00020  -0.00017   2.11549
   A22        2.06641  -0.00085  -0.00065  -0.00198  -0.00257   2.06384
   A23        2.12614   0.00055   0.00078   0.00074   0.00156   2.12770
   A24        2.09063   0.00030  -0.00032   0.00124   0.00095   2.09158
   A25        2.11335  -0.00011   0.00007  -0.00062  -0.00052   2.11283
   A26        2.09129  -0.00009  -0.00011   0.00008  -0.00013   2.09116
   A27        2.07821   0.00021   0.00002   0.00100   0.00095   2.07916
   A28        2.10587   0.00052   0.00029   0.00144   0.00174   2.10761
   A29        2.09891  -0.00013  -0.00066   0.00045  -0.00026   2.09865
   A30        2.07832  -0.00039   0.00035  -0.00171  -0.00139   2.07693
   A31        2.09643  -0.00011  -0.00032   0.00006  -0.00025   2.09619
   A32        2.07153   0.00034   0.00043   0.00116   0.00158   2.07311
   A33        2.11522  -0.00023  -0.00011  -0.00122  -0.00133   2.11389
   A34        2.10802   0.00034  -0.00026   0.00152   0.00127   2.10928
   A35        2.05575  -0.00011   0.00031  -0.00061  -0.00031   2.05544
   A36        2.11937  -0.00024  -0.00008  -0.00083  -0.00091   2.11846
   A37        2.12567   0.00001   0.00033  -0.00038  -0.00005   2.12562
   A38        2.09390  -0.00015  -0.00081   0.00046  -0.00035   2.09355
   A39        2.06361   0.00015   0.00048  -0.00008   0.00040   2.06402
   A40        2.07939  -0.00005  -0.00020  -0.00002  -0.00024   2.07915
   A41        2.12329  -0.00011  -0.00062   0.00019  -0.00043   2.12286
   A42        2.08049   0.00016   0.00082  -0.00014   0.00068   2.08117
    D1       -0.00215   0.00003  -0.00081   0.00256   0.00176  -0.00040
    D2        3.13693   0.00008   0.00012   0.00374   0.00387   3.14079
    D3        3.13967   0.00003  -0.00117   0.00249   0.00131   3.14098
    D4       -0.00444   0.00009  -0.00024   0.00366   0.00342  -0.00101
    D5       -0.00059   0.00001  -0.00070   0.00127   0.00057  -0.00002
    D6        3.14044   0.00002  -0.00036   0.00109   0.00073   3.14117
    D7        3.14077   0.00001  -0.00034   0.00135   0.00101  -3.14140
    D8       -0.00139   0.00002   0.00000   0.00117   0.00117  -0.00021
    D9        0.00395  -0.00007   0.00188  -0.00494  -0.00305   0.00090
   D10        3.13760   0.00008   0.00267   0.00151   0.00419  -3.14140
   D11       -3.13519  -0.00012   0.00097  -0.00608  -0.00511  -3.14030
   D12       -0.00155   0.00003   0.00176   0.00037   0.00213   0.00058
   D13       -0.00304   0.00006  -0.00145   0.00351   0.00206  -0.00098
   D14        3.13157   0.00019  -0.00258   0.01004   0.00746   3.13903
   D15       -3.13650  -0.00009  -0.00226  -0.00308  -0.00535   3.14134
   D16       -0.00189   0.00005  -0.00338   0.00345   0.00005  -0.00184
   D17        3.14078   0.00010  -0.00303   0.00630   0.00324  -3.13916
   D18        0.00022  -0.00027  -0.01167   0.00188  -0.00978  -0.00956
   D19       -0.00895   0.00025  -0.00222   0.01288   0.01065   0.00170
   D20        3.13368  -0.00012  -0.01086   0.00847  -0.00238   3.13131
   D21        0.00035  -0.00001  -0.00004   0.00026   0.00023   0.00058
   D22        3.13735   0.00008  -0.00014   0.00325   0.00312   3.14046
   D23       -3.13448  -0.00014   0.00105  -0.00605  -0.00500  -3.13948
   D24        0.00252  -0.00005   0.00095  -0.00306  -0.00211   0.00040
   D25        3.13146   0.00033   0.00955  -0.00546   0.00409   3.13555
   D26        0.00532  -0.00020   0.00756  -0.01150  -0.00395   0.00137
   D27       -0.01708   0.00046   0.00843   0.00104   0.00946  -0.00762
   D28        3.13996  -0.00007   0.00644  -0.00500   0.00143   3.14138
   D29        0.00148  -0.00002   0.00112  -0.00267  -0.00155  -0.00007
   D30       -3.13955  -0.00003   0.00078  -0.00249  -0.00171  -3.14126
   D31       -3.13536  -0.00012   0.00123  -0.00577  -0.00454  -3.13990
   D32        0.00680  -0.00013   0.00088  -0.00559  -0.00470   0.00209
   D33        0.00184   0.00007  -0.00641   0.00370  -0.00269  -0.00084
   D34        3.11528   0.00040  -0.00707   0.02277   0.01571   3.13098
   D35       -3.12449  -0.00045  -0.00837  -0.00225  -0.01062  -3.13511
   D36       -0.01106  -0.00012  -0.00903   0.01681   0.00777  -0.00329
   D37        0.01599  -0.00037   0.00330  -0.02046  -0.01716  -0.00117
   D38       -3.14004  -0.00014   0.00223  -0.00592  -0.00368   3.13947
   D39       -3.12662  -0.00001   0.01172  -0.01614  -0.00441  -3.13103
   D40        0.00054   0.00022   0.01066  -0.00160   0.00907   0.00961
   D41       -0.01274   0.00021   0.00113   0.01239   0.01355   0.00081
   D42       -3.14007  -0.00002   0.00220  -0.00199   0.00022  -3.13985
   D43       -3.12638  -0.00011   0.00179  -0.00651  -0.00471  -3.13109
   D44        0.02947  -0.00034   0.00286  -0.02090  -0.01803   0.01144
   D45       -3.13436  -0.00009  -0.00035  -0.00558  -0.00593  -3.14029
   D46        0.01068  -0.00011  -0.00008  -0.00724  -0.00732   0.00336
   D47       -0.02036   0.00023  -0.00100   0.01308   0.01208  -0.00828
   D48        3.12468   0.00021  -0.00073   0.01141   0.01070   3.13537
   D49        3.13287   0.00003  -0.00219   0.00335   0.00117   3.13404
   D50        0.00202  -0.00012  -0.00015  -0.00585  -0.00601  -0.00399
   D51       -0.02292   0.00027  -0.00324   0.01769   0.01444  -0.00848
   D52        3.12940   0.00012  -0.00121   0.00848   0.00727   3.13667
   D53        0.00464  -0.00007  -0.00054  -0.00195  -0.00249   0.00214
   D54       -3.13884   0.00001   0.00025  -0.00076  -0.00051  -3.13935
   D55       -3.14049  -0.00004  -0.00083  -0.00024  -0.00107  -3.14156
   D56       -0.00078   0.00003  -0.00004   0.00095   0.00091   0.00014
   D57        0.00724  -0.00009   0.00171  -0.00659  -0.00487   0.00236
   D58       -3.12865  -0.00022   0.00233  -0.01172  -0.00939  -3.13804
   D59        3.13770   0.00006  -0.00039   0.00296   0.00256   3.14027
   D60        0.00182  -0.00006   0.00022  -0.00217  -0.00195  -0.00013
   D61        0.00243  -0.00001   0.00020  -0.00162  -0.00141   0.00102
   D62        3.13846   0.00010  -0.00040   0.00339   0.00299   3.14145
   D63       -3.13732  -0.00008  -0.00058  -0.00279  -0.00336  -3.14068
   D64       -0.00129   0.00003  -0.00118   0.00222   0.00104  -0.00025
         Item               Value     Threshold  Converged?
 Maximum Force            0.002404     0.000450     NO 
 RMS     Force            0.000342     0.000300     NO 
 Maximum Displacement     0.029153     0.001800     NO 
 RMS     Displacement     0.004724     0.001200     NO 
 Predicted change in Energy=-4.368885D-05
 Lowest energy point so far.  Saving SCF results.
 GradGradGradGradGradGradGradGradGradGradGradGradGradGradGradGradGradGrad

 Leave Link  103 at Sun Jan 12 22:09:57 2020, MaxMem=   134217728 cpu:         0.0
 (Enter E:\Gaussian\G09W\l202.exe)
                          Input orientation:                          
 ---------------------------------------------------------------------
 Center     Atomic      Atomic             Coordinates (Angstroms)
 Number     Number       Type             X           Y           Z
 ---------------------------------------------------------------------
      1          6           0       -5.051331    0.075254    0.126117
      2          6           0       -4.014181    0.991087    0.104730
      3          6           0       -2.678488    0.558255    0.063303
      4          6           0       -2.402579   -0.829526    0.042455
      5          6           0       -3.469428   -1.743848    0.064819
      6          6           0       -4.778623   -1.301577    0.106082
      7          1           0       -6.078165    0.422286    0.158661
      8          1           0       -4.210173    2.055800    0.119054
      9          1           0       -3.235618   -2.801196    0.047172
     10          1           0       -5.594081   -2.015797    0.123351
     11          6           0       -1.023945   -1.349201   -0.004208
     12          8           0       -0.773107   -2.563482   -0.016401
     13          6           0       -1.603236    1.555090    0.041780
     14          6           0        0.048517   -0.352751   -0.026155
     15          6           0       -0.253802    1.092303   -0.003351
     16          6           0        1.366811   -0.763348   -0.057172
     17          6           0        0.837009    2.035255   -0.028550
     18          6           0        2.395509    0.182816   -0.076677
     19          1           0        1.582122   -1.823949   -0.067875
     20          6           0        2.123279    1.609401   -0.062650
     21          1           0        0.592801    3.088521   -0.015897
     22          1           0        2.951138    2.305548   -0.078554
     23         35           0        4.181971   -0.378776   -0.122371
     24          8           0       -1.843900    2.803157    0.049212
 ---------------------------------------------------------------------
                    Distance matrix (angstroms):
                    1          2          3          4          5
     1  C    0.000000
     2  C    1.383794   0.000000
     3  C    2.422317   1.404684   0.000000
     4  C    2.800271   2.432236   1.415096   0.000000
     5  C    2.411495   2.788946   2.434187   1.405223   0.000000
     6  C    1.403721   2.416750   2.805597   2.423318   1.382498
     7  H    1.084379   2.141605   3.403731   3.884646   3.392116
     8  H    2.151780   1.082697   2.142851   3.405638   3.871559
     9  H    3.402501   3.871806   3.405373   2.140435   1.083034
    10  H    2.160342   3.396731   3.889734   3.405799   2.142786
    11  C    4.273862   3.798727   2.525957   1.474066   2.478083
    12  O    5.028562   4.811880   3.658151   2.380178   2.819316
    13  C    3.753184   2.476837   1.466394   2.515024   3.790277
    14  C    5.120042   4.281185   2.876542   2.497977   3.784093
    15  C    4.905857   3.763293   2.483697   2.883186   4.288198
    16  C    6.475291   5.662096   4.257416   3.771287   4.936139
    17  C    6.207905   4.964081   3.814274   4.325152   5.730248
    18  C    7.450378   6.462998   5.089793   4.905168   6.174912
    19  H    6.902703   6.266803   4.883124   4.108392   5.053927
    20  C    7.339228   6.170798   4.917086   5.142256   6.522185
    21  H    6.399701   5.063404   4.136405   4.932220   6.313478
    22  H    8.309971   7.090633   5.896257   6.205289   7.592222
    23  Br   9.247797   8.312942   6.926644   6.602017   7.774469
    24  O    4.211292   2.827861   2.395062   3.675398   4.828855
                    6          7          8          9         10
     6  C    0.000000
     7  H    2.159462   0.000000
     8  H    3.405185   2.481800   0.000000
     9  H    2.152485   4.299226   4.954325   0.000000
    10  H    1.084149   2.485927   4.300363   2.486966   0.000000
    11  C    3.756600   5.358156   4.664899   2.646210   4.620256
    12  O    4.201377   6.090082   5.759300   2.474775   4.853996
    13  C    4.271740   4.617564   2.655712   4.652089   5.355813
    14  C    4.921284   6.178274   4.894757   4.097048   5.884470
    15  C    5.120219   5.865012   4.073841   4.904397   6.180203
    16  C    6.171119   7.541882   6.251512   5.034488   7.074972
    17  C    6.533598   7.103264   5.049382   6.323234   7.602172
    18  C    7.328370   8.480324   6.868874   6.374109   8.288996
    19  H    6.384529   7.986043   6.974101   4.917201   7.181313
    20  C    7.492564   8.289867   6.351764   6.941412   8.528440
    21  H    6.938302   7.186172   4.914599   7.024923   8.021905
    22  H    8.531978   9.226660   7.168389   8.023129   9.577868
    23  Br   9.010882  10.295196   8.741483   7.804966   9.915211
    24  O    5.046253   4.858963   2.482472   5.774570   6.106690
                   11         12         13         14         15
    11  C    0.000000
    12  O    1.239978   0.000000
    13  C    2.961858   4.201801   0.000000
    14  C    1.464093   2.358493   2.524433   0.000000
    15  C    2.560090   3.692507   1.427298   1.476516   0.000000
    16  C    2.462061   2.796675   3.769101   1.381105   2.464290
    17  C    3.862420   4.872474   2.488032   2.514817   1.442104
    18  C    3.747665   4.193556   4.229318   2.407853   2.802034
    19  H    2.649721   2.469142   4.645044   2.125584   3.446637
    20  C    4.319926   5.079777   3.728373   2.855873   2.433397
    21  H    4.723069   5.814709   2.679051   3.484065   2.168359
    22  H    5.400371   6.130360   4.617357   3.936307   3.427720
    23  Br   5.296909   5.416361   6.102082   4.134655   4.674861
    24  O    4.232879   5.472816   1.271080   3.680582   2.336279
                   16         17         18         19         20
    16  C    0.000000
    17  C    2.848454   0.000000
    18  C    1.397793   2.421316   0.000000
    19  H    1.082288   3.930674   2.165359   0.000000
    20  C    2.490424   1.355361   1.452395   3.475740   0.000000
    21  H    3.929083   1.081280   3.420026   5.011369   2.128931
    22  H    3.453791   2.131924   2.194247   4.350525   1.081769
    23  Br   2.842054   4.126150   1.873210   2.975014   2.862626
    24  O    4.799994   2.789802   4.985442   5.758598   4.144403
                   21         22         23         24
    21  H    0.000000
    22  H    2.485705   0.000000
    23  Br   4.991556   2.953382   0.000000
    24  O    2.454218   4.822482   6.816543   0.000000
 Stoichiometry    C14H7BrO2
 Framework group  C1[X(C14H7BrO2)]
 Deg. of freedom    66
 Full point group                 C1      NOp   1
 RotChk:  IX=0 Diff= 2.23D-03
 Largest Abelian subgroup         C1      NOp   1
 Largest concise Abelian subgroup C1      NOp   1
                         Standard orientation:                         
 ---------------------------------------------------------------------
 Center     Atomic      Atomic             Coordinates (Angstroms)
 Number     Number       Type             X           Y           Z
 ---------------------------------------------------------------------
      1          6           0        5.055972    0.085716   -0.006857
      2          6           0        4.016166    0.998782   -0.006581
      3          6           0        2.681011    0.562335   -0.003152
      4          6           0        2.408372   -0.826242    0.001142
      5          6           0        3.477889   -1.737716    0.000679
      6          6           0        4.786526   -1.291897   -0.003219
      7          1           0        6.082372    0.435532   -0.010094
      8          1           0        4.209610    2.064056   -0.008618
      9          1           0        3.246534   -2.795742    0.005093
     10          1           0        5.604069   -2.003939   -0.003849
     11          6           0        1.030388   -1.349673    0.008095
     12          8           0        0.782574   -2.564633    0.005558
     13          6           0        1.602895    1.556305   -0.003199
     14          6           0       -0.044949   -0.356085    0.008544
     15          6           0        0.253988    1.089844    0.003372
     16          6           0       -1.362497   -0.770183    0.002173
     17          6           0       -0.839635    2.029869    0.006231
     18          6           0       -2.393887    0.173247    0.000992
     19          1           0       -1.575170   -1.831368    0.000109
     20          6           0       -2.125209    1.600572    0.003680
     21          1           0       -0.598004    3.083804    0.007054
     22          1           0       -2.955065    2.294520    0.002499
     23         35           0       -4.179420   -0.393114   -0.004015
     24          8           0        1.840323    2.804993    0.004057
 ---------------------------------------------------------------------
 Rotational constants (GHZ):      0.9867235      0.1793990      0.1518004
 Leave Link  202 at Sun Jan 12 22:09:57 2020, MaxMem=   134217728 cpu:         0.0
 (Enter E:\Gaussian\G09W\l301.exe)
 Standard basis: 6-311G(d) (5D, 7F)
 Ernie: Thresh=  0.10000D-02 Tol=  0.10000D-05 Strict=F.
 There are   372 symmetry adapted cartesian basis functions of A   symmetry.
 There are   353 symmetry adapted basis functions of A   symmetry.
   353 basis functions,   637 primitive gaussians,   372 cartesian basis functions
    71 alpha electrons       71 beta electrons
       nuclear repulsion energy      1373.4656794338 Hartrees.
 IExCor=  402 DFT=T Ex+Corr=B3LYP ExCW=0 ScaHFX=  0.200000
 ScaDFX=  0.800000  0.720000  1.000000  0.810000 ScalE2=  1.000000  1.000000
 IRadAn=      0 IRanWt=     -1 IRanGd=            0 ICorTp=0 IEmpDi=141
 NAtoms=   24 NActive=   24 NUniq=   24 SFac= 1.00D+00 NAtFMM=   60 NAOKFM=F Big=F
 Integral buffers will be    262144 words long.
 Regular integral format.
 Two-electron integral symmetry is turned on.
 R6Disp:  Grimme-D3(BJ) Dispersion energy=       -0.0619589134 Hartrees.
 Nuclear repulsion after empirical dispersion term =     1373.4037205204 Hartrees.
 ------------------------------------------------------------------------------
 Polarizable Continuum Model (PCM)
 =================================
 Model                : PCM (using non-symmetric T matrix).
 Atomic radii         : UFF (Universal Force Field).
 Polarization charges : Total charges.
 Charge compensation  : None.
 Solution method      : On-the-fly selection.
 Cavity type          : Scaled VdW (van der Waals Surface) (Alpha=1.100).
 Cavity algorithm     : GePol (No added spheres)
                        Default sphere list used, NSphG=   24.
                        Lebedev-Laikov grids with approx.  5.0 points / Ang**2.
                        Smoothing algorithm: Karplus/York (Gamma=1.0000).
                        Polarization charges: spherical gaussians, with
                                              point-specific exponents (IZeta= 3).
                        Self-potential: point-specific (ISelfS= 7).
                        Self-field    : sphere-specific E.n sum rule (ISelfD= 2).
 1st derivatives      : Analytical E(r).r(x)/FMM algorithm (CHGder, D1EAlg=3).
                        Cavity 1st derivative terms included.
 Solvent              : Acetonitrile, Eps=  35.688000 Eps(inf)=   1.806874
 ------------------------------------------------------------------------------
 GePol: Number of generator spheres                  =      24
 GePol: Total number of spheres                      =      24
 GePol: Number of exposed spheres                    =      24 (100.00%)
 GePol: Number of points                             =    2163
 GePol: Average weight of points                     =       0.13
 GePol: Minimum weight of points                     =   0.17D-09
 GePol: Maximum weight of points                     =    0.20577
 GePol: Number of points with low weight             =     126
 GePol: Fraction of low-weight points (<1% of avg)   =       5.83%
 GePol: Cavity surface area                          =    279.844 Ang**2
 GePol: Cavity volume                                =    306.108 Ang**3
 Leave Link  301 at Sun Jan 12 22:09:58 2020, MaxMem=   134217728 cpu:         0.0
 (Enter E:\Gaussian\G09W\l302.exe)
 NPDir=0 NMtPBC=     1 NCelOv=     1 NCel=       1 NClECP=     1 NCelD=      1
         NCelK=      1 NCelE2=     1 NClLst=     1 CellRange=     0.0.
 One-electron integrals computed using PRISM.
 NBasis=   353 RedAO= T EigKep=  9.95D-05  NBF=   353
 NBsUse=   353 1.00D-06 EigRej= -1.00D+00 NBFU=   353
 Precomputing XC quadrature grid using
 IXCGrd= 4 IRadAn=           0 IRanWt=          -1 IRanGd=           0 AccXCQ= 0.00D+00.
 Generated NRdTot=       0 NPtTot=           0 NUsed=           0 NTot=          16
 NSgBfM=   363   363   363   363   363 MxSgAt=    24 MxSgA2=    24.
 Leave Link  302 at Sun Jan 12 22:10:00 2020, MaxMem=   134217728 cpu:         2.0
 (Enter E:\Gaussian\G09W\l308.exe)
 Leave Link  308 at Sun Jan 12 22:10:01 2020, MaxMem=   134217728 cpu:         0.0
 (Enter E:\Gaussian\G09W\l303.exe)
 DipDrv:  MaxL=1.
 Leave Link  303 at Sun Jan 12 22:10:01 2020, MaxMem=   134217728 cpu:         0.0
 (Enter E:\Gaussian\G09W\l401.exe)
 Initial guess from the checkpoint file:  "E:\Gaussian file\error\2-BrAQ excited triplet state opt.chk"
 B after Tr=     0.000000    0.000000    0.000000
         Rot=    1.000000    0.000002    0.000000    0.000027 Ang=   0.00 deg.
 Guess basis will be translated and rotated to current coordinates.
 JPrj=2 DoOrth=T DoCkMO=T.
 Generating alternative initial guess.
 ExpMin= 1.03D-01 ExpMax= 4.40D+05 ExpMxC= 1.51D+04 IAcc=2 IRadAn=         4 AccDes= 0.00D+00
 Harris functional with IExCor=  402 and IRadAn=       4 diagonalized for initial guess.
 HarFok:  IExCor=  402 AccDes= 0.00D+00 IRadAn=         4 IDoV= 1 UseB2=F ITyADJ=14
 ICtDFT=  3500011 ScaDFX=  1.000000  1.000000  1.000000  1.000000
 FoFCou: FMM=F IPFlag=           0 FMFlag=      100000 FMFlg1=           0
         NFxFlg=           0 DoJE=T BraDBF=F KetDBF=T FulRan=T
         wScrn=  0.000000 ICntrl=     500 IOpCl=  0 I1Cent=   200000004 NGrid=           0
         NMat0=    1 NMatS0=      1 NMatT0=    0 NMatD0=    1 NMtDS0=    0 NMtDT0=    0
 Petite list used in FoFCou.
 Harris En= -3262.59044842238    
 Leave Link  401 at Sun Jan 12 22:10:18 2020, MaxMem=   134217728 cpu:        16.0
 (Enter E:\Gaussian\G09W\l502.exe)
 Closed shell SCF:
 Using DIIS extrapolation, IDIIS=  1040.
 Integral symmetry usage will be decided dynamically.
 IVT=      438130 IEndB=      438130 NGot=   134217728 MDV=   133934995
 LenX=   133934995 LenY=   133796170
 Requested convergence on RMS density matrix=1.00D-08 within 128 cycles.
 Requested convergence on MAX density matrix=1.00D-06.
 Requested convergence on             energy=1.00D-06.
 No special actions if energy rises.
 Fock matrices will be formed incrementally for  20 cycles.

 Cycle   1  Pass 1  IDiag  1:
 FoFJK:  IHMeth= 1 ICntrl=       0 DoSepK=F KAlg= 0 I1Cent=   0 FoldK=F
 IRaf= 780000000 NMat=   1 IRICut=       1 DoRegI=T DoRafI=F ISym2E= 0.
 FoFCou: FMM=F IPFlag=           0 FMFlag=      100000 FMFlg1=           0
         NFxFlg=           0 DoJE=F BraDBF=F KetDBF=F FulRan=T
         wScrn=  0.000000 ICntrl=       0 IOpCl=  0 I1Cent=           0 NGrid=           0
         NMat0=    1 NMatS0=      1 NMatT0=    0 NMatD0=    1 NMtDS0=    0 NMtDT0=    0
 Symmetry not used in FoFCou.
 Inv3:  Mode=1 IEnd=    14035707.
 Iteration    1 A*A^-1 deviation from unit magnitude is 2.66D-15 for    840.
 Iteration    1 A*A^-1 deviation from orthogonality  is 2.86D-15 for   1121    807.
 Iteration    1 A^-1*A deviation from unit magnitude is 2.33D-15 for    476.
 Iteration    1 A^-1*A deviation from orthogonality  is 5.32D-13 for   1270   1242.
 E= -3262.52963431857    
 DIIS: error= 2.83D-04 at cycle   1 NSaved=   1.
 NSaved= 1 IEnMin= 1 EnMin= -3262.52963431857     IErMin= 1 ErrMin= 2.83D-04
 ErrMax= 2.83D-04  0.00D+00 EMaxC= 1.00D-01 BMatC= 6.75D-05 BMatP= 6.75D-05
 IDIUse=3 WtCom= 9.97D-01 WtEn= 2.83D-03
 Coeff-Com:  0.100D+01
 Coeff-En:   0.100D+01
 Coeff:      0.100D+01
 Gap=     0.806 Goal=   None    Shift=    0.000
 RMSDP=1.82D-04 MaxDP=5.85D-03              OVMax= 2.87D-03

 Cycle   2  Pass 1  IDiag  1:
 RMSU=  1.82D-04    CP:  1.00D+00
 E= -3262.52975889353     Delta-E=       -0.000124574967 Rises=F Damp=F
 DIIS: error= 7.58D-05 at cycle   2 NSaved=   2.
 NSaved= 2 IEnMin= 2 EnMin= -3262.52975889353     IErMin= 2 ErrMin= 7.58D-05
 ErrMax= 7.58D-05  0.00D+00 EMaxC= 1.00D-01 BMatC= 2.04D-06 BMatP= 6.75D-05
 IDIUse=1 WtCom= 1.00D+00 WtEn= 0.00D+00
 Coeff-Com: -0.222D-01 0.102D+01
 Coeff:     -0.222D-01 0.102D+01
 Gap=     0.129 Goal=   None    Shift=    0.000
 RMSDP=1.49D-05 MaxDP=5.93D-04 DE=-1.25D-04 OVMax= 8.39D-04

 Cycle   3  Pass 1  IDiag  1:
 RMSU=  1.40D-05    CP:  1.00D+00  1.03D+00
 E= -3262.52975745590     Delta-E=        0.000001437639 Rises=F Damp=F
 DIIS: error= 1.91D-04 at cycle   3 NSaved=   3.
 NSaved= 3 IEnMin= 2 EnMin= -3262.52975889353     IErMin= 2 ErrMin= 7.58D-05
 ErrMax= 1.91D-04  0.00D+00 EMaxC= 1.00D-01 BMatC= 5.81D-06 BMatP= 2.04D-06
 IDIUse=3 WtCom= 4.20D-01 WtEn= 5.80D-01
 Coeff-Com: -0.403D-01 0.674D+00 0.366D+00
 Coeff-En:   0.000D+00 0.620D+00 0.380D+00
 Coeff:     -0.169D-01 0.643D+00 0.374D+00
 Gap=     0.129 Goal=   None    Shift=    0.000
 RMSDP=1.18D-05 MaxDP=4.83D-04 DE= 1.44D-06 OVMax= 6.07D-04

 Cycle   4  Pass 1  IDiag  1:
 RMSU=  4.96D-06    CP:  1.00D+00  1.03D+00  2.35D-01
 E= -3262.52976154604     Delta-E=       -0.000004090146 Rises=F Damp=F
 DIIS: error= 4.83D-05 at cycle   4 NSaved=   4.
 NSaved= 4 IEnMin= 4 EnMin= -3262.52976154604     IErMin= 4 ErrMin= 4.83D-05
 ErrMax= 4.83D-05  0.00D+00 EMaxC= 1.00D-01 BMatC= 3.31D-07 BMatP= 2.04D-06
 IDIUse=1 WtCom= 1.00D+00 WtEn= 0.00D+00
 Coeff-Com: -0.154D-01 0.179D+00 0.218D+00 0.618D+00
 Coeff:     -0.154D-01 0.179D+00 0.218D+00 0.618D+00
 Gap=     0.129 Goal=   None    Shift=    0.000
 RMSDP=2.76D-06 MaxDP=9.43D-05 DE=-4.09D-06 OVMax= 1.34D-04

 Cycle   5  Pass 1  IDiag  1:
 RMSU=  1.26D-06    CP:  1.00D+00  1.03D+00  3.97D-01  8.07D-01
 E= -3262.52976178969     Delta-E=       -0.000000243653 Rises=F Damp=F
 DIIS: error= 8.48D-06 at cycle   5 NSaved=   5.
 NSaved= 5 IEnMin= 5 EnMin= -3262.52976178969     IErMin= 5 ErrMin= 8.48D-06
 ErrMax= 8.48D-06  0.00D+00 EMaxC= 1.00D-01 BMatC= 2.43D-08 BMatP= 3.31D-07
 IDIUse=1 WtCom= 1.00D+00 WtEn= 0.00D+00
 Coeff-Com: -0.360D-02 0.201D-01 0.750D-01 0.321D+00 0.587D+00
 Coeff:     -0.360D-02 0.201D-01 0.750D-01 0.321D+00 0.587D+00
 Gap=     0.129 Goal=   None    Shift=    0.000
 RMSDP=6.40D-07 MaxDP=2.40D-05 DE=-2.44D-07 OVMax= 6.15D-05

 Cycle   6  Pass 1  IDiag  1:
 RMSU=  4.78D-07    CP:  1.00D+00  1.03D+00  3.92D-01  8.66D-01  7.76D-01
 E= -3262.52976181070     Delta-E=       -0.000000021003 Rises=F Damp=F
 DIIS: error= 3.58D-06 at cycle   6 NSaved=   6.
 NSaved= 6 IEnMin= 6 EnMin= -3262.52976181070     IErMin= 6 ErrMin= 3.58D-06
 ErrMax= 3.58D-06  0.00D+00 EMaxC= 1.00D-01 BMatC= 4.38D-09 BMatP= 2.43D-08
 IDIUse=1 WtCom= 1.00D+00 WtEn= 0.00D+00
 Coeff-Com:  0.414D-03-0.184D-01 0.703D-02 0.833D-01 0.340D+00 0.587D+00
 Coeff:      0.414D-03-0.184D-01 0.703D-02 0.833D-01 0.340D+00 0.587D+00
 Gap=     0.129 Goal=   None    Shift=    0.000
 RMSDP=3.11D-07 MaxDP=1.12D-05 DE=-2.10D-08 OVMax= 2.47D-05

 Cycle   7  Pass 1  IDiag  1:
 RMSU=  1.92D-07    CP:  1.00D+00  1.03D+00  3.97D-01  8.79D-01  8.83D-01
                    CP:  6.45D-01
 E= -3262.52976181477     Delta-E=       -0.000000004077 Rises=F Damp=F
 DIIS: error= 1.98D-06 at cycle   7 NSaved=   7.
 NSaved= 7 IEnMin= 7 EnMin= -3262.52976181477     IErMin= 7 ErrMin= 1.98D-06
 ErrMax= 1.98D-06  0.00D+00 EMaxC= 1.00D-01 BMatC= 8.47D-10 BMatP= 4.38D-09
 IDIUse=1 WtCom= 1.00D+00 WtEn= 0.00D+00
 Coeff-Com:  0.693D-03-0.146D-01-0.427D-02 0.178D-01 0.151D+00 0.376D+00
 Coeff-Com:  0.473D+00
 Coeff:      0.693D-03-0.146D-01-0.427D-02 0.178D-01 0.151D+00 0.376D+00
 Coeff:      0.473D+00
 Gap=     0.129 Goal=   None    Shift=    0.000
 RMSDP=1.56D-07 MaxDP=6.23D-06 DE=-4.08D-09 OVMax= 9.08D-06

 Cycle   8  Pass 1  IDiag  1:
 RMSU=  9.62D-08    CP:  1.00D+00  1.03D+00  3.97D-01  8.85D-01  8.54D-01
                    CP:  8.25D-01  6.90D-01
 E= -3262.52976181550     Delta-E=       -0.000000000729 Rises=F Damp=F
 DIIS: error= 7.53D-07 at cycle   8 NSaved=   8.
 NSaved= 8 IEnMin= 8 EnMin= -3262.52976181550     IErMin= 8 ErrMin= 7.53D-07
 ErrMax= 7.53D-07  0.00D+00 EMaxC= 1.00D-01 BMatC= 9.88D-11 BMatP= 8.47D-10
 IDIUse=1 WtCom= 1.00D+00 WtEn= 0.00D+00
 Coeff-Com:  0.333D-03-0.526D-02-0.421D-02-0.581D-02 0.270D-01 0.119D+00
 Coeff-Com:  0.281D+00 0.587D+00
 Coeff:      0.333D-03-0.526D-02-0.421D-02-0.581D-02 0.270D-01 0.119D+00
 Coeff:      0.281D+00 0.587D+00
 Gap=     0.129 Goal=   None    Shift=    0.000
 RMSDP=6.97D-08 MaxDP=2.38D-06 DE=-7.29D-10 OVMax= 5.26D-06

 Cycle   9  Pass 1  IDiag  1:
 RMSU=  3.42D-08    CP:  1.00D+00  1.03D+00  3.97D-01  8.87D-01  8.82D-01
                    CP:  8.03D-01  8.50D-01  6.73D-01
 E= -3262.52976181564     Delta-E=       -0.000000000139 Rises=F Damp=F
 DIIS: error= 2.27D-07 at cycle   9 NSaved=   9.
 NSaved= 9 IEnMin= 9 EnMin= -3262.52976181564     IErMin= 9 ErrMin= 2.27D-07
 ErrMax= 2.27D-07  0.00D+00 EMaxC= 1.00D-01 BMatC= 1.43D-11 BMatP= 9.88D-11
 IDIUse=1 WtCom= 1.00D+00 WtEn= 0.00D+00
 Coeff-Com:  0.672D-04-0.317D-03-0.161D-02-0.636D-02-0.120D-01-0.636D-03
 Coeff-Com:  0.747D-01 0.320D+00 0.626D+00
 Coeff:      0.672D-04-0.317D-03-0.161D-02-0.636D-02-0.120D-01-0.636D-03
 Coeff:      0.747D-01 0.320D+00 0.626D+00
 Gap=     0.129 Goal=   None    Shift=    0.000
 RMSDP=2.18D-08 MaxDP=7.99D-07 DE=-1.39D-10 OVMax= 2.43D-06

 Cycle  10  Pass 1  IDiag  1:
 RMSU=  1.09D-08    CP:  1.00D+00  1.03D+00  3.97D-01  8.88D-01  8.82D-01
                    CP:  8.24D-01  8.67D-01  8.04D-01  8.05D-01
 E= -3262.52976181559     Delta-E=        0.000000000054 Rises=F Damp=F
 DIIS: error= 1.39D-07 at cycle  10 NSaved=  10.
 NSaved=10 IEnMin= 9 EnMin= -3262.52976181564     IErMin=10 ErrMin= 1.39D-07
 ErrMax= 1.39D-07  0.00D+00 EMaxC= 1.00D-01 BMatC= 4.49D-12 BMatP= 1.43D-11
 IDIUse=1 WtCom= 1.00D+00 WtEn= 0.00D+00
 Coeff-Com: -0.192D-04 0.834D-03-0.247D-03-0.315D-02-0.131D-01-0.236D-01
 Coeff-Com: -0.543D-02 0.936D-01 0.415D+00 0.536D+00
 Coeff:     -0.192D-04 0.834D-03-0.247D-03-0.315D-02-0.131D-01-0.236D-01
 Coeff:     -0.543D-02 0.936D-01 0.415D+00 0.536D+00
 Gap=     0.129 Goal=   None    Shift=    0.000
 RMSDP=7.93D-09 MaxDP=1.82D-07 DE= 5.37D-11 OVMax= 9.24D-07

 Error on total polarization charges =  0.01376
 SCF Done:  E(RB3LYP) =  -3262.52976182     A.U. after   10 cycles
            NFock= 10  Conv=0.79D-08     -V/T= 2.0018
 KE= 3.256592588335D+03 PE=-1.050289566516D+04 EE= 2.610369594490D+03
 Leave Link  502 at Sun Jan 12 22:21:32 2020, MaxMem=   134217728 cpu:       674.0
 (Enter E:\Gaussian\G09W\l801.exe)
 DoSCS=F DFT=T ScalE2(SS,OS)=  1.000000  1.000000
 ExpMin= 1.03D-01 ExpMax= 4.40D+05 ExpMxC= 1.51D+04 IAcc=3 IRadAn=         5 AccDes= 0.00D+00
 HarFok:  IExCor=  205 AccDes= 0.00D+00 IRadAn=         5 IDoV=-2 UseB2=F ITyADJ=14
 ICtDFT= 12500011 ScaDFX=  1.000000  1.000000  1.000000  1.000000
 Largest valence mixing into a core orbital is  2.38D-04
 Largest core mixing into a valence orbital is  1.99D-05
 Range of M.O.s used for correlation:    31   353
 NBasis=   353 NAE=    71 NBE=    71 NFC=    30 NFV=     0
 NROrb=    323 NOA=    41 NOB=    41 NVA=   282 NVB=   282

 **** Warning!!: The largest alpha MO coefficient is  0.26242329D+02

 Leave Link  801 at Sun Jan 12 22:21:35 2020, MaxMem=   134217728 cpu:         2.0
 (Enter E:\Gaussian\G09W\l914.exe)
 RHF ground state
 MDV=   134217728 DFT=T DoStab=F Mixed=T DoRPA=T DoScal=F NonHer=T
 NEqPCM:  Using equilibrium solvation (IEInf=0, Eps=  35.6880, EpsInf=   1.8069)
 Making orbital integer symmetry assigments:
 Orbital symmetries:
       Occupied  (A) (A) (A) (A) (A) (A) (A) (A) (A) (A) (A) (A)
                 (A) (A) (A) (A) (A) (A) (A) (A) (A) (A) (A) (A)
                 (A) (A) (A) (A) (A) (A) (A) (A) (A) (A) (A) (A)
                 (A) (A) (A) (A) (A) (A) (A) (A) (A) (A) (A) (A)
                 (A) (A) (A) (A) (A) (A) (A) (A) (A) (A) (A) (A)
                 (A) (A) (A) (A) (A) (A) (A) (A) (A) (A) (A)
       Virtual   (A) (A) (A) (A) (A) (A) (A) (A) (A) (A) (A) (A)
                 (A) (A) (A) (A) (A) (A) (A) (A) (A) (A) (A) (A)
                 (A) (A) (A) (A) (A) (A) (A) (A) (A) (A) (A) (A)
                 (A) (A) (A) (A) (A) (A) (A) (A) (A) (A) (A) (A)
                 (A) (A) (A) (A) (A) (A) (A) (A) (A) (A) (A) (A)
                 (A) (A) (A) (A) (A) (A) (A) (A) (A) (A) (A) (A)
                 (A) (A) (A) (A) (A) (A) (A) (A) (A) (A) (A) (A)
                 (A) (A) (A) (A) (A) (A) (A) (A) (A) (A) (A) (A)
                 (A) (A) (A) (A) (A) (A) (A) (A) (A) (A) (A) (A)
                 (A) (A) (A) (A) (A) (A) (A) (A) (A) (A) (A) (A)
                 (A) (A) (A) (A) (A) (A) (A) (A) (A) (A) (A) (A)
                 (A) (A) (A) (A) (A) (A) (A) (A) (A) (A) (A) (A)
                 (A) (A) (A) (A) (A) (A) (A) (A) (A) (A) (A) (A)
                 (A) (A) (A) (A) (A) (A) (A) (A) (A) (A) (A) (A)
                 (A) (A) (A) (A) (A) (A) (A) (A) (A) (A) (A) (A)
                 (A) (A) (A) (A) (A) (A) (A) (A) (A) (A) (A) (A)
                 (A) (A) (A) (A) (A) (A) (A) (A) (A) (A) (A) (A)
                 (A) (A) (A) (A) (A) (A) (A) (A) (A) (A) (A) (A)
                 (A) (A) (A) (A) (A) (A) (A) (A) (A) (A) (A) (A)
                 (A) (A) (A) (A) (A) (A) (A) (A) (A) (A) (A) (A)
                 (A) (A) (A) (A) (A) (A) (A) (A) (A) (A) (A) (A)
                 (A) (A) (A) (A) (A) (A) (A) (A) (A) (A) (A) (A)
                 (A) (A) (A) (A) (A) (A) (A) (A) (A) (A) (A) (A)
                 (A) (A) (A) (A) (A) (A)
 Generating guess from densities on rwf.
 Convergence on wavefunction:    0.000001000000000
 Davidson Disk Diagonalization:  ConvIn= 1.00D-06 SkipCon=T Conv= 1.00D-06.
 Max sub-space:   200 roots to seek:     5 dimension of matrix:        23124
 Iteration     1 Dimension    10 NMult     0 NNew     10
 CISAX will form    10 AO SS matrices at one time.
 NMat=    10 NSing=     0 JSym2X= 0.
 FoFJK:  IHMeth= 1 ICntrl=       0 DoSepK=F KAlg= 0 I1Cent=   0 FoldK=F
 IRaf=         0 NMat=  20 IRICut=       1 DoRegI=T DoRafI=F ISym2E= 0.
 FoFCou: FMM=F IPFlag=           0 FMFlag=      100000 FMFlg1=           0
         NFxFlg=           0 DoJE=F BraDBF=F KetDBF=F FulRan=T
         wScrn=  0.000000 ICntrl=       0 IOpCl=  0 I1Cent=           0 NGrid=           0
         NMat0=   20 NMatS0=      0 NMatT0=   10 NMatD0=   20 NMtDS0=    0 NMtDT0=    0
 Symmetry not used in FoFCou.
 Excitation Energies [eV] at current iteration:
 Root      1 :     2.078963166436739
 Root      2 :     2.311480858165398
 Root      3 :     2.555933276804126
 Root      4 :     2.579053025634955
 Root      5 :     2.766428655237056
 Iteration     2 Dimension    20 NMult    10 NNew     10
 CISAX will form    10 AO SS matrices at one time.
 NMat=    10 NSing=     0 JSym2X= 0.
 Root      1 not converged, maximum delta is    0.002155978249400
 Root      2 not converged, maximum delta is    0.001378715344973
 Root      3 not converged, maximum delta is    0.002454085647978
 Root      4 not converged, maximum delta is    0.001641006883374
 Root      5 not converged, maximum delta is    0.002101907091554
 Excitation Energies [eV] at current iteration:
 Root      1 :     2.078586996904101   Change is   -0.000376169532638
 Root      2 :     2.311304295836166   Change is   -0.000176562329232
 Root      3 :     2.555624647711341   Change is   -0.000308629092785
 Root      4 :     2.578633419067049   Change is   -0.000419606567905
 Root      5 :     2.766095166494752   Change is   -0.000333488742304
 Iteration     3 Dimension    30 NMult    20 NNew     10
 CISAX will form    10 AO SS matrices at one time.
 NMat=    10 NSing=     0 JSym2X= 0.
 Root      1 not converged, maximum delta is    0.000246648699590
 Root      2 not converged, maximum delta is    0.000519063843702
 Root      3 not converged, maximum delta is    0.001493600286108
 Root      4 not converged, maximum delta is    0.000406886852784
 Root      5 not converged, maximum delta is    0.000496642854405
 Excitation Energies [eV] at current iteration:
 Root      1 :     2.078581649369578   Change is   -0.000005347534523
 Root      2 :     2.311300660668237   Change is   -0.000003635167929
 Root      3 :     2.555607755870903   Change is   -0.000016891840438
 Root      4 :     2.578625098383343   Change is   -0.000008320683707
 Root      5 :     2.766087975448802   Change is   -0.000007191045950
 Iteration     4 Dimension    40 NMult    30 NNew     10
 CISAX will form    10 AO SS matrices at one time.
 NMat=    10 NSing=     0 JSym2X= 0.
 Root      1 not converged, maximum delta is    0.000085091351076
 Root      2 not converged, maximum delta is    0.000180968561724
 Root      3 not converged, maximum delta is    0.000819142961617
 Root      4 not converged, maximum delta is    0.000075760931059
 Root      5 not converged, maximum delta is    0.000441731750129
 Excitation Energies [eV] at current iteration:
 Root      1 :     2.078581376973212   Change is   -0.000000272396366
 Root      2 :     2.311300379143418   Change is   -0.000000281524820
 Root      3 :     2.555604896399835   Change is   -0.000002859471069
 Root      4 :     2.578624700165547   Change is   -0.000000398217795
 Root      5 :     2.766087268208029   Change is   -0.000000707240773
 Iteration     5 Dimension    50 NMult    40 NNew     10
 CISAX will form    10 AO SS matrices at one time.
 NMat=    10 NSing=     0 JSym2X= 0.
 Root      1 not converged, maximum delta is    0.000012048623333
 Root      2 not converged, maximum delta is    0.000012912622401
 Root      3 not converged, maximum delta is    0.000078549860944
 Root      4 not converged, maximum delta is    0.000027651466712
 Root      5 not converged, maximum delta is    0.000092571680015
 Excitation Energies [eV] at current iteration:
 Root      1 :     2.078581361553411   Change is   -0.000000015419801
 Root      2 :     2.311300365038464   Change is   -0.000000014104954
 Root      3 :     2.555604678784814   Change is   -0.000000217615021
 Root      4 :     2.578624671165410   Change is   -0.000000029000138
 Root      5 :     2.766087182756820   Change is   -0.000000085451208
 Iteration     6 Dimension    60 NMult    50 NNew     10
 CISAX will form    10 AO SS matrices at one time.
 NMat=    10 NSing=     0 JSym2X= 0.
 Root      1 not converged, maximum delta is    0.000001837329173
 Root      2 not converged, maximum delta is    0.000002141604688
 Root      3 not converged, maximum delta is    0.000008257425120
 Root      4 not converged, maximum delta is    0.000004506097622
 Root      5 not converged, maximum delta is    0.000010872934941
 Excitation Energies [eV] at current iteration:
 Root      1 :     2.078581360861526   Change is   -0.000000000691884
 Root      2 :     2.311300364454336   Change is   -0.000000000584127
 Root      3 :     2.555604669249842   Change is   -0.000000009534973
 Root      4 :     2.578624668466386   Change is   -0.000000002699024
 Root      5 :     2.766087175783757   Change is   -0.000000006973063
 Iteration     7 Dimension    70 NMult    60 NNew     10
 CISAX will form    10 AO SS matrices at one time.
 NMat=    10 NSing=     0 JSym2X= 0.
 Root      1 has converged.
 Root      2 has converged.
 Root      3 not converged, maximum delta is    0.000001251623544
 Root      4 not converged, maximum delta is    0.000001126897696
 Root      5 not converged, maximum delta is    0.000001998933301
 Excitation Energies [eV] at current iteration:
 Root      1 :     2.078581360836373   Change is   -0.000000000025154
 Root      2 :     2.311300364424673   Change is   -0.000000000029664
 Root      3 :     2.555604668723677   Change is   -0.000000000526164
 Root      4 :     2.578624668311957   Change is   -0.000000000154428
 Root      5 :     2.766087175274746   Change is   -0.000000000509011
 Iteration     8 Dimension    76 NMult    70 NNew      6
 CISAX will form     6 AO SS matrices at one time.
 NMat=     6 NSing=     0 JSym2X= 0.
 Root      1 has converged.
 Root      2 has converged.
 Root      3 has converged.
 Root      4 has converged.
 Root      5 has converged.
 Excitation Energies [eV] at current iteration:
 Root      1 :     2.078581360836373   Change is    0.000000000000000
 Root      2 :     2.311300364422681   Change is   -0.000000000001992
 Root      3 :     2.555604668697364   Change is   -0.000000000026313
 Root      4 :     2.578624668300416   Change is   -0.000000000011541
 Root      5 :     2.766087175241460   Change is   -0.000000000033286
 Convergence achieved on expansion vectors.
 ***********************************************************************
 Excited states from <AA,BB:AA,BB> singles matrix:
 ***********************************************************************
 
 1PDM for each excited state written to RWF  633
 Ground to excited state transition densities written to RWF  633
 Ground to excited state transition electric dipole moments (Au):
       state          X           Y           Z        Dip. S.      Osc.
         1         0.0000      0.0000      0.0000      0.0000      0.0000
         2         0.0000      0.0000      0.0000      0.0000      0.0000
         3         0.0000      0.0000      0.0000      0.0000      0.0000
         4         0.0000      0.0000      0.0000      0.0000      0.0000
         5         0.0000      0.0000      0.0000      0.0000      0.0000
 Ground to excited state transition velocity dipole moments (Au):
       state          X           Y           Z        Dip. S.      Osc.
         1         0.0000      0.0000      0.0000      0.0000      0.0000
         2         0.0000      0.0000      0.0000      0.0000      0.0000
         3         0.0000      0.0000      0.0000      0.0000      0.0000
         4         0.0000      0.0000      0.0000      0.0000      0.0000
         5         0.0000      0.0000      0.0000      0.0000      0.0000
 Ground to excited state transition magnetic dipole moments (Au):
       state          X           Y           Z
         1         0.0000      0.0000      0.0000
         2         0.0000      0.0000      0.0000
         3         0.0000      0.0000      0.0000
         4         0.0000      0.0000      0.0000
         5         0.0000      0.0000      0.0000
 Ground to excited state transition velocity quadrupole moments (Au):
       state          XX          YY          ZZ          XY          XZ          YZ
         1         0.0000      0.0000      0.0000      0.0000      0.0000      0.0000
         2         0.0000      0.0000      0.0000      0.0000      0.0000      0.0000
         3         0.0000      0.0000      0.0000      0.0000      0.0000      0.0000
         4         0.0000      0.0000      0.0000      0.0000      0.0000      0.0000
         5         0.0000      0.0000      0.0000      0.0000      0.0000      0.0000
 <0|del|b> * <b|rxdel|0> + <0|del|b> * <b|delr+rdel|0>
 Rotatory Strengths (R) in cgs (10**-40 erg-esu-cm/Gauss)
       state          XX          YY          ZZ    R(velocity)    E-M Angle
         1         0.0000      0.0000      0.0000      0.0000       90.00
         2         0.0000      0.0000      0.0000      0.0000       90.00
         3         0.0000      0.0000      0.0000      0.0000       90.00
         4         0.0000      0.0000      0.0000      0.0000       90.00
         5         0.0000      0.0000      0.0000      0.0000       90.00
 1/2[<0|r|b>*<b|rxdel|0> + (<0|rxdel|b>*<b|r|0>)*]
 Rotatory Strengths (R) in cgs (10**-40 erg-esu-cm/Gauss)
       state          XX          YY          ZZ     R(length)
         1         0.0000      0.0000      0.0000      0.0000
         2         0.0000      0.0000      0.0000      0.0000
         3         0.0000      0.0000      0.0000      0.0000
         4         0.0000      0.0000      0.0000      0.0000
         5         0.0000      0.0000      0.0000      0.0000
  1/2[<0|del|b>*<b|r|0> + (<0|r|b>*<b|del|0>)*] (Au)
       state          X           Y           Z        Dip. S.   Osc.(frdel)
         1         0.0000      0.0000      0.0000      0.0000      0.0000
         2         0.0000      0.0000      0.0000      0.0000      0.0000
         3         0.0000      0.0000      0.0000      0.0000      0.0000
         4         0.0000      0.0000      0.0000      0.0000      0.0000
         5         0.0000      0.0000      0.0000      0.0000      0.0000

 Excitation energies and oscillator strengths:
 
 Excited State   1:      Triplet-A      2.0786 eV  596.48 nm  f=0.0000  <S**2>=2.000
      64 -> 72        -0.15405
      66 -> 72         0.11744
      68 -> 72         0.14217
      71 -> 72         0.63718
      71 -> 74         0.12843
 This state for optimization and/or second-order correction.
 Total Energy, E(TD-HF/TD-KS) =  -3262.45337535    
 Copying the excited state density for this state as the 1-particle RhoCI density.
 
 Excited State   2:      Triplet-A      2.3113 eV  536.43 nm  f=0.0000  <S**2>=2.000
      70 -> 72         0.68102
 
 Excited State   3:      Triplet-A      2.5556 eV  485.15 nm  f=0.0000  <S**2>=2.000
      67 -> 72        -0.67072
      67 -> 73         0.12419
      70 -> 73        -0.12435
 
 Excited State   4:      Triplet-A      2.5786 eV  480.82 nm  f=0.0000  <S**2>=2.000
      66 -> 72         0.16050
      68 -> 72         0.55794
      68 -> 74        -0.13384
      69 -> 72        -0.22896
      69 -> 73        -0.12480
      71 -> 72        -0.21380
 
 Excited State   5:      Triplet-A      2.7661 eV  448.23 nm  f=0.0000  <S**2>=2.000
      66 -> 72         0.24308
      68 -> 72         0.15598
      69 -> 72         0.61923
 SavETr:  write IOETrn=   770 NScale= 10 NData=  16 NLR=1 NState=    5 LETran=      96.
 The selected state is a triplet
 CISAX will form     1 AO SS matrices at one time.
 NMat=     1 NSing=     0 JSym2X= 0.
 CISAX will form     1 AO SS matrices at one time.
 NMat=     1 NSing=     0 JSym2X= 0.
 Leave Link  914 at Sun Jan 12 23:08:17 2020, MaxMem=   134217728 cpu:      2802.0
 (Enter E:\Gaussian\G09W\l1002.exe)
 Minotr:  Closed shell wavefunction.
          Computing CIS/TD-HF/TD-KS derivatives.
          Using Z-Vector for PSCF gradient.
          Skipping F1 and S1 gradient terms here.
          IDoAtm=111111111111111111111111
 NEqPCM:  Using equilibrium solvation (IEInf=0, Eps=  35.6880, EpsInf=   1.8069)
          Frozen-core window.
          Direct CPHF calculation.
          Differentiating once with respect to electric field.
                with respect to dipole field.
          Differentiating once with respect to nuclear coordinates.
          Requested convergence is 1.0D-10 RMS, and 1.0D-09 maximum.
          NewPWx=F KeepS1=T KeepF1=T KeepIn=T MapXYZ=F SortEE=F KeepMc=T.
          MDV=     134217394 using IRadAn=       0.
 Using stored XC quadrature information.
          Solving linear equations separately, MaxMat=       0.
          There are     1 degrees of freedom in the 1st order CPHF.  IDoFFX=0 NUNeed=     1.
 FoFJK:  IHMeth= 1 ICntrl=       0 DoSepK=F KAlg= 0 I1Cent=   0 FoldK=F
 IRaf= 800000000 NMat=   1 IRICut=       1 DoRegI=T DoRafI=F ISym2E=-1.
 FoFCou: FMM=F IPFlag=           0 FMFlag=      100000 FMFlg1=           0
         NFxFlg=           0 DoJE=F BraDBF=F KetDBF=F FulRan=T
         wScrn=  0.000000 ICntrl=       0 IOpCl=  0 I1Cent=           0 NGrid=           0
         NMat0=    1 NMatS0=      1 NMatT0=    0 NMatD0=    1 NMtDS0=    0 NMtDT0=    0
 Petite list used in FoFCou.
 LinEq1:  Iter=  0 NonCon=     1 RMS=3.47D-03 Max=1.86D-01 NDo=     1
 AX will form     1 AO Fock derivatives at one time.
 LinEq1:  Iter=  1 NonCon=     1 RMS=2.39D-03 Max=1.24D-01 NDo=     1
 LinEq1:  Iter=  2 NonCon=     1 RMS=1.86D-03 Max=7.99D-02 NDo=     1
 LinEq1:  Iter=  3 NonCon=     1 RMS=1.02D-03 Max=4.69D-02 NDo=     1
 LinEq1:  Iter=  4 NonCon=     1 RMS=6.27D-04 Max=3.92D-02 NDo=     1
 LinEq1:  Iter=  5 NonCon=     1 RMS=4.13D-04 Max=1.59D-02 NDo=     1
 LinEq1:  Iter=  6 NonCon=     1 RMS=2.82D-04 Max=1.08D-02 NDo=     1
 LinEq1:  Iter=  7 NonCon=     1 RMS=1.96D-04 Max=8.26D-03 NDo=     1
 LinEq1:  Iter=  8 NonCon=     1 RMS=1.22D-04 Max=6.65D-03 NDo=     1
 LinEq1:  Iter=  9 NonCon=     1 RMS=9.70D-05 Max=3.41D-03 NDo=     1
 LinEq1:  Iter= 10 NonCon=     1 RMS=6.26D-05 Max=2.15D-03 NDo=     1
 LinEq1:  Iter= 11 NonCon=     1 RMS=3.84D-05 Max=1.54D-03 NDo=     1
 LinEq1:  Iter= 12 NonCon=     1 RMS=1.83D-05 Max=8.56D-04 NDo=     1
 LinEq1:  Iter= 13 NonCon=     1 RMS=9.80D-06 Max=5.08D-04 NDo=     1
 LinEq1:  Iter= 14 NonCon=     1 RMS=4.51D-06 Max=1.61D-04 NDo=     1
 LinEq1:  Iter= 15 NonCon=     1 RMS=2.54D-06 Max=9.22D-05 NDo=     1
 LinEq1:  Iter= 16 NonCon=     1 RMS=9.72D-07 Max=3.53D-05 NDo=     1
 LinEq1:  Iter= 17 NonCon=     1 RMS=6.61D-07 Max=1.75D-05 NDo=     1
 LinEq1:  Iter= 18 NonCon=     1 RMS=3.32D-07 Max=1.39D-05 NDo=     1
 LinEq1:  Iter= 19 NonCon=     1 RMS=1.58D-07 Max=3.08D-06 NDo=     1
 LinEq1:  Iter= 20 NonCon=     1 RMS=6.32D-08 Max=1.74D-06 NDo=     1
 LinEq1:  Iter= 21 NonCon=     1 RMS=3.29D-08 Max=1.42D-06 NDo=     1
 LinEq1:  Iter= 22 NonCon=     1 RMS=1.67D-08 Max=6.51D-07 NDo=     1
 LinEq1:  Iter= 23 NonCon=     1 RMS=1.14D-08 Max=4.51D-07 NDo=     1
 LinEq1:  Iter= 24 NonCon=     1 RMS=5.12D-09 Max=2.40D-07 NDo=     1
 LinEq1:  Iter= 25 NonCon=     1 RMS=3.12D-09 Max=1.14D-07 NDo=     1
 LinEq1:  Iter= 26 NonCon=     1 RMS=1.33D-09 Max=5.02D-08 NDo=     1
 LinEq1:  Iter= 27 NonCon=     1 RMS=3.96D-10 Max=1.06D-08 NDo=     1
 LinEq1:  Iter= 28 NonCon=     1 RMS=1.78D-10 Max=4.01D-09 NDo=     1
 LinEq1:  Iter= 29 NonCon=     1 RMS=1.06D-10 Max=3.48D-09 NDo=     1
 LinEq1:  Iter= 30 NonCon=     0 RMS=2.27D-11 Max=6.91D-10 NDo=     1
 Linear equations converged to 1.000D-10 1.000D-09 after    30 iterations.
 End of Minotr F.D. properties file   721 does not exist.
 End of Minotr F.D. properties file   722 does not exist.
 End of Minotr F.D. properties file   788 does not exist.
 Leave Link 1002 at Sun Jan 12 23:45:07 2020, MaxMem=   134217728 cpu:      2209.0
 (Enter E:\Gaussian\G09W\l701.exe)
 Compute integral first derivatives.
 ... and contract with generalized density number  6.
 R6Disp: Adding Grimme-D3(BJ) dispersion energy 1st derivatives to the gradient.
 D1PCM: PCM CHGder 1st derivatives, ID1Alg=3 FixD1E=F DoIter=F DoCFld=F I1PDM=6.
 GePol: Maximum number of non-zero 1st derivatives   =     349
 Leave Link  701 at Sun Jan 12 23:45:56 2020, MaxMem=   134217728 cpu:        48.0
 (Enter E:\Gaussian\G09W\l702.exe)
 L702 exits ... SP integral derivatives will be done elsewhere.
 Leave Link  702 at Sun Jan 12 23:45:56 2020, MaxMem=   134217728 cpu:         0.0
 (Enter E:\Gaussian\G09W\l703.exe)
 Compute integral first derivatives, UseDBF=F ICtDFT=           0.
 Integral derivatives from FoFJK, PRISM(SPDF).
 Calling FoFJK, ICntrl=  10005127 FMM=F ISym2X=0 I1Cent= 0 IOpClX= 0 NMat=1 NMatS=1 NMatT=0.
 FoFJK:  IHMeth= 1 ICntrl=10005127 DoSepK=F KAlg= 0 I1Cent=   0 FoldK=F
 IRaf=         0 NMat=   1 IRICut=       1 DoRegI=T DoRafI=F ISym2E= 0.
 FoFCou: FMM=F IPFlag=           0 FMFlag=      100000 FMFlg1=         800
         NFxFlg=           0 DoJE=F BraDBF=F KetDBF=F FulRan=T
         wScrn=  0.000000 ICntrl=10005127 IOpCl=  0 I1Cent=           0 NGrid=           0
         NMat0=    1 NMatS0=      1 NMatT0=    0 NMatD0=    1 NMtDS0=    0 NMtDT0=    0
 Symmetry not used in FoFCou.
 Leave Link  703 at Sun Jan 12 23:49:45 2020, MaxMem=   134217728 cpu:       228.0
 (Enter E:\Gaussian\G09W\l716.exe)
 Dipole        =-1.39201212D+00 5.02980111D-01-5.74244867D-03
 ***** Axes restored to original set *****
 -------------------------------------------------------------------
 Center     Atomic                   Forces (Hartrees/Bohr)
 Number     Number              X              Y              Z
 -------------------------------------------------------------------
      1        6          -0.000081260    0.000069964    0.000020422
      2        6          -0.000088412   -0.000049114   -0.000011863
      3        6           0.000465805   -0.000172075    0.000117468
      4        6           0.000283947   -0.000022188   -0.000218136
      5        6           0.000049595   -0.000163017   -0.000063378
      6        6           0.000051865    0.000027568    0.000068543
      7        1           0.000013041    0.000044860   -0.000013199
      8        1          -0.000066523    0.000018586    0.000026107
      9        1          -0.000108697    0.000022460    0.000047426
     10        1           0.000023827   -0.000051622   -0.000030343
     11        6          -0.000317205    0.001490920    0.000648490
     12        8           0.000240336   -0.001085112   -0.000324007
     13        6          -0.000401369    0.000257651   -0.000681181
     14        6          -0.000306666    0.000391883    0.000215600
     15        6          -0.000014491   -0.000792903    0.000088420
     16        6           0.000076090   -0.000266241   -0.000194566
     17        6          -0.000060448    0.000020195    0.000012654
     18        6          -0.000104483    0.000539350    0.000060959
     19        1           0.000066128    0.000058287    0.000008721
     20        6           0.000267086   -0.000457357   -0.000032568
     21        1           0.000022821    0.000053066    0.000026937
     22        1          -0.000071808    0.000102360   -0.000014071
     23       35          -0.000032271   -0.000048762   -0.000005975
     24        8           0.000093092    0.000011241    0.000247540
 -------------------------------------------------------------------
 Cartesian Forces:  Max     0.001490920 RMS     0.000311643
 Leave Link  716 at Sun Jan 12 23:49:46 2020, MaxMem=   134217728 cpu:         0.0
 (Enter E:\Gaussian\G09W\l103.exe)

 GradGradGradGradGradGradGradGradGradGradGradGradGradGradGradGradGradGrad
 Berny optimization.
 Using GEDIIS/GDIIS optimizer.
 FormGI is forming the generalized inverse of G from B-inverse, IUseBI=4.
 Internal  Forces:  Max     0.001114360 RMS     0.000138219
 Search for a local minimum.
 Step number   5 out of a maximum of  142
 All quantities printed in internal units (Hartrees-Bohrs-Radians)
 RMS Force = .13822D-03 SwitMx=.10000D-02 MixMth= 2
 Mixed Optimization -- En-DIIS/RFO-DIIS
 Swapping is turned off.
 Update second derivatives using D2CorX and points    1    2    3    4    5
 DE= -5.04D-05 DEPred=-4.37D-05 R= 1.15D+00
 TightC=F SS=  1.41D+00  RLast= 5.34D-02 DXNew= 8.4853D-01 1.6010D-01
 Trust test= 1.15D+00 RLast= 5.34D-02 DXMaxT set to 5.05D-01
 ITU=  1  1  0  1  0
     Eigenvalues ---    0.00548   0.01269   0.01391   0.01566   0.01604
     Eigenvalues ---    0.01709   0.01775   0.01784   0.01877   0.02022
     Eigenvalues ---    0.02077   0.02078   0.02119   0.02134   0.02159
     Eigenvalues ---    0.02172   0.02180   0.02221   0.02244   0.02606
     Eigenvalues ---    0.04058   0.15562   0.15984   0.16000   0.16000
     Eigenvalues ---    0.16000   0.16000   0.16116   0.19558   0.21921
     Eigenvalues ---    0.22425   0.22570   0.23393   0.23966   0.24520
     Eigenvalues ---    0.24893   0.24934   0.24999   0.25000   0.25029
     Eigenvalues ---    0.25184   0.33024   0.34219   0.35360   0.35421
     Eigenvalues ---    0.35456   0.35587   0.35619   0.35705   0.35746
     Eigenvalues ---    0.35806   0.36427   0.37445   0.38327   0.38936
     Eigenvalues ---    0.39975   0.41410   0.43482   0.43793   0.44413
     Eigenvalues ---    0.46853   0.47481   0.48669   0.52286   0.77095
     Eigenvalues ---    0.81266
 En-DIIS/RFO-DIIS IScMMF=        0 using points:     5    4    3    2
 RFO step:  Lambda=-5.46096052D-06.
 NNeg= 0 NP= 4 Switch=  2.50D-03 Rises=F DC=  2.10D-04 SmlDif=  1.00D-05
 RMS Error=  0.4047155209D-03 NUsed= 4 EDIIS=F
 DidBck=F Rises=F RFO-DIIS coefs:    1.20724   -0.16623   -0.02998   -0.01103
 Iteration  1 RMS(Cart)=  0.00239413 RMS(Int)=  0.00001055
 Iteration  2 RMS(Cart)=  0.00001037 RMS(Int)=  0.00000825
 Iteration  3 RMS(Cart)=  0.00000000 RMS(Int)=  0.00000825
 ITry= 1 IFail=0 DXMaxC= 1.31D-02 DCOld= 1.00D+10 DXMaxT= 5.05D-01 DXLimC= 3.00D+00 Rises=F
 Variable       Old X    -DE/DX   Delta X   Delta X   Delta X     New X
                                 (Linear)    (Quad)   (Total)
    R1        2.61499  -0.00007   0.00020  -0.00032  -0.00012   2.61487
    R2        2.65265   0.00006   0.00000   0.00013   0.00013   2.65278
    R3        2.04918   0.00000   0.00007  -0.00003   0.00004   2.04922
    R4        2.65447   0.00015   0.00012   0.00035   0.00047   2.65493
    R5        2.04600   0.00004   0.00002   0.00012   0.00014   2.04614
    R6        2.67414  -0.00006  -0.00001  -0.00016  -0.00017   2.67397
    R7        2.77108  -0.00017   0.00021  -0.00068  -0.00047   2.77061
    R8        2.65549   0.00013   0.00040   0.00010   0.00050   2.65599
    R9        2.78558  -0.00031  -0.00009  -0.00112  -0.00122   2.78436
   R10        2.61254   0.00002   0.00013  -0.00001   0.00012   2.61266
   R11        2.04664  -0.00005   0.00006  -0.00021  -0.00015   2.04649
   R12        2.04875   0.00001   0.00005   0.00001   0.00006   2.04881
   R13        2.34322   0.00111   0.00043   0.00144   0.00187   2.34509
   R14        2.76674  -0.00028  -0.00015  -0.00102  -0.00117   2.76556
   R15        2.69720   0.00009   0.00020   0.00007   0.00027   2.69748
   R16        2.40199  -0.00001   0.00039  -0.00015   0.00024   2.40223
   R17        2.79021  -0.00049  -0.00007  -0.00148  -0.00155   2.78866
   R18        2.60991   0.00016   0.00044   0.00011   0.00056   2.61046
   R19        2.72518   0.00008   0.00015   0.00022   0.00037   2.72555
   R20        2.64145   0.00006  -0.00005   0.00026   0.00020   2.64165
   R21        2.04523  -0.00004   0.00009  -0.00019  -0.00010   2.04513
   R22        2.56126   0.00007   0.00010   0.00003   0.00013   2.56139
   R23        2.04332   0.00004   0.00005   0.00014   0.00020   2.04352
   R24        2.74463  -0.00040  -0.00012  -0.00105  -0.00117   2.74346
   R25        3.53985  -0.00001  -0.00001  -0.00032  -0.00033   3.53953
   R26        2.04425   0.00001   0.00007  -0.00001   0.00006   2.04431
    A1        2.09823  -0.00006   0.00000  -0.00035  -0.00035   2.09788
    A2        2.09253  -0.00003  -0.00007  -0.00027  -0.00034   2.09219
    A3        2.09242   0.00009   0.00007   0.00062   0.00069   2.09311
    A4        2.10506   0.00004   0.00017   0.00014   0.00032   2.10538
    A5        2.11175  -0.00008  -0.00016  -0.00053  -0.00069   2.11106
    A6        2.06637   0.00004  -0.00001   0.00038   0.00037   2.06675
    A7        2.08062   0.00000  -0.00023   0.00008  -0.00015   2.08046
    A8        2.08084  -0.00007  -0.00005  -0.00043  -0.00048   2.08036
    A9        2.12173   0.00007   0.00029   0.00035   0.00063   2.12236
   A10        2.08270  -0.00002   0.00018  -0.00010   0.00008   2.08278
   A11        2.12770  -0.00005  -0.00015  -0.00017  -0.00033   2.12737
   A12        2.07278   0.00007  -0.00003   0.00028   0.00025   2.07303
   A13        2.10746  -0.00003  -0.00010  -0.00014  -0.00025   2.10722
   A14        2.06130   0.00012   0.00046   0.00075   0.00121   2.06251
   A15        2.11442  -0.00010  -0.00036  -0.00061  -0.00097   2.11346
   A16        2.09229   0.00006  -0.00001   0.00037   0.00035   2.09265
   A17        2.09418   0.00002   0.00007   0.00017   0.00025   2.09442
   A18        2.09672  -0.00008  -0.00006  -0.00054  -0.00060   2.09612
   A19        2.13500  -0.00001  -0.00012   0.00006  -0.00008   2.13492
   A20        2.03266   0.00007   0.00021   0.00022   0.00040   2.03306
   A21        2.11549  -0.00006  -0.00004  -0.00023  -0.00029   2.11520
   A22        2.06384  -0.00024  -0.00044  -0.00095  -0.00142   2.06242
   A23        2.12770   0.00023   0.00020   0.00110   0.00126   2.12896
   A24        2.09158   0.00001   0.00028  -0.00002   0.00022   2.09181
   A25        2.11283  -0.00003  -0.00013  -0.00017  -0.00033   2.11250
   A26        2.09116  -0.00001   0.00000   0.00000  -0.00002   2.09114
   A27        2.07916   0.00004   0.00020   0.00021   0.00038   2.07954
   A28        2.10761   0.00017   0.00032   0.00073   0.00105   2.10866
   A29        2.09865  -0.00014   0.00008  -0.00080  -0.00072   2.09793
   A30        2.07693  -0.00003  -0.00038   0.00007  -0.00033   2.07660
   A31        2.09619  -0.00006   0.00002  -0.00039  -0.00038   2.09580
   A32        2.07311   0.00010   0.00027   0.00063   0.00090   2.07401
   A33        2.11389  -0.00005  -0.00028  -0.00024  -0.00052   2.11337
   A34        2.10928   0.00005   0.00033   0.00008   0.00040   2.10968
   A35        2.05544   0.00001  -0.00013   0.00027   0.00014   2.05558
   A36        2.11846  -0.00006  -0.00019  -0.00035  -0.00053   2.11792
   A37        2.12562   0.00005  -0.00008   0.00040   0.00031   2.12593
   A38        2.09355  -0.00014   0.00009  -0.00082  -0.00073   2.09282
   A39        2.06402   0.00009   0.00000   0.00041   0.00042   2.06443
   A40        2.07915  -0.00006  -0.00001  -0.00032  -0.00034   2.07881
   A41        2.12286  -0.00009   0.00003  -0.00084  -0.00081   2.12205
   A42        2.08117   0.00015  -0.00002   0.00117   0.00115   2.08232
    D1       -0.00040   0.00000   0.00055  -0.00031   0.00024  -0.00016
    D2        3.14079   0.00000   0.00081   0.00013   0.00094  -3.14145
    D3        3.14098   0.00001   0.00052  -0.00001   0.00051   3.14149
    D4       -0.00101   0.00001   0.00078   0.00043   0.00121   0.00019
    D5       -0.00002   0.00000   0.00026  -0.00013   0.00013   0.00011
    D6        3.14117   0.00001   0.00022   0.00057   0.00079  -3.14123
    D7       -3.14140  -0.00001   0.00029  -0.00043  -0.00014  -3.14154
    D8       -0.00021   0.00000   0.00025   0.00027   0.00052   0.00031
    D9        0.00090  -0.00001  -0.00104   0.00014  -0.00090   0.00000
   D10       -3.14140  -0.00003   0.00039  -0.00083  -0.00044   3.14134
   D11       -3.14030  -0.00001  -0.00129  -0.00029  -0.00158   3.14130
   D12        0.00058  -0.00003   0.00014  -0.00126  -0.00113  -0.00054
   D13       -0.00098   0.00002   0.00072   0.00047   0.00119   0.00021
   D14        3.13903   0.00005   0.00209   0.00134   0.00343  -3.14073
   D15        3.14134   0.00004  -0.00074   0.00146   0.00072  -3.14113
   D16       -0.00184   0.00007   0.00063   0.00233   0.00296   0.00112
   D17       -3.13916  -0.00006   0.00092  -0.00447  -0.00356   3.14046
   D18       -0.00956   0.00013   0.00038   0.00878   0.00917  -0.00039
   D19        0.00170  -0.00007   0.00238  -0.00547  -0.00309  -0.00138
   D20        3.13131   0.00011   0.00184   0.00779   0.00963   3.14094
   D21        0.00058  -0.00002   0.00008  -0.00091  -0.00084  -0.00026
   D22        3.14046   0.00002   0.00070   0.00074   0.00144  -3.14128
   D23       -3.13948  -0.00005  -0.00125  -0.00175  -0.00300   3.14070
   D24        0.00040  -0.00001  -0.00062  -0.00010  -0.00073  -0.00032
   D25        3.13555   0.00016  -0.00133   0.00779   0.00646  -3.14117
   D26        0.00137  -0.00005  -0.00191   0.00108  -0.00084   0.00053
   D27       -0.00762   0.00019   0.00003   0.00865   0.00869   0.00107
   D28        3.14138  -0.00002  -0.00055   0.00194   0.00139  -3.14041
   D29       -0.00007   0.00001  -0.00057   0.00075   0.00017   0.00010
   D30       -3.14126   0.00000  -0.00053   0.00005  -0.00048   3.14144
   D31       -3.13990  -0.00003  -0.00122  -0.00095  -0.00217   3.14111
   D32        0.00209  -0.00004  -0.00118  -0.00166  -0.00283  -0.00074
   D33       -0.00084   0.00003   0.00027  -0.00131  -0.00104  -0.00189
   D34        3.13098   0.00010   0.00434   0.00409   0.00843   3.13941
   D35       -3.13511  -0.00017  -0.00031  -0.00795  -0.00826   3.13982
   D36       -0.00329  -0.00011   0.00377  -0.00254   0.00122  -0.00207
   D37       -0.00117   0.00006  -0.00399   0.00517   0.00118   0.00001
   D38        3.13947   0.00003  -0.00086   0.00323   0.00237  -3.14135
   D39       -3.13103  -0.00012  -0.00346  -0.00781  -0.01127   3.14088
   D40        0.00961  -0.00015  -0.00033  -0.00976  -0.01008  -0.00047
   D41        0.00081  -0.00004   0.00272  -0.00187   0.00085   0.00166
   D42       -3.13985  -0.00001  -0.00037   0.00005  -0.00032  -3.14017
   D43       -3.13109  -0.00010  -0.00132  -0.00724  -0.00856  -3.13965
   D44        0.01144  -0.00008  -0.00441  -0.00532  -0.00973   0.00171
   D45       -3.14029   0.00000  -0.00123  -0.00074  -0.00197   3.14092
   D46        0.00336  -0.00003  -0.00157  -0.00256  -0.00413  -0.00077
   D47       -0.00828   0.00007   0.00276   0.00456   0.00732  -0.00096
   D48        3.13537   0.00003   0.00242   0.00273   0.00516   3.14053
   D49        3.13404   0.00007   0.00066   0.00508   0.00574   3.13979
   D50       -0.00399   0.00005  -0.00129   0.00400   0.00271  -0.00128
   D51       -0.00848   0.00004   0.00374   0.00317   0.00691  -0.00157
   D52        3.13667   0.00002   0.00179   0.00209   0.00388   3.14055
   D53        0.00214  -0.00003  -0.00040  -0.00171  -0.00211   0.00004
   D54       -3.13935  -0.00001  -0.00013  -0.00124  -0.00138  -3.14073
   D55       -3.14156   0.00001  -0.00006   0.00016   0.00011  -3.14145
   D56        0.00014   0.00002   0.00021   0.00063   0.00083   0.00097
   D57        0.00236   0.00000  -0.00139  -0.00031  -0.00170   0.00067
   D58       -3.13804  -0.00002  -0.00248  -0.00100  -0.00348  -3.14151
   D59        3.14027   0.00002   0.00063   0.00081   0.00144  -3.14147
   D60       -0.00013   0.00000  -0.00046   0.00012  -0.00034  -0.00047
   D61        0.00102  -0.00001  -0.00035  -0.00053  -0.00089   0.00013
   D62        3.14145   0.00001   0.00071   0.00014   0.00085  -3.14089
   D63       -3.14068  -0.00002  -0.00061  -0.00099  -0.00160   3.14091
   D64       -0.00025   0.00000   0.00046  -0.00032   0.00014  -0.00011
         Item               Value     Threshold  Converged?
 Maximum Force            0.001114     0.000450     NO 
 RMS     Force            0.000138     0.000300     YES
 Maximum Displacement     0.013131     0.001800     NO 
 RMS     Displacement     0.002393     0.001200     NO 
 Predicted change in Energy=-1.081002D-05
 Lowest energy point so far.  Saving SCF results.
 GradGradGradGradGradGradGradGradGradGradGradGradGradGradGradGradGradGrad

 Leave Link  103 at Sun Jan 12 23:49:47 2020, MaxMem=   134217728 cpu:         0.0
 (Enter E:\Gaussian\G09W\l202.exe)
                          Input orientation:                          
 ---------------------------------------------------------------------
 Center     Atomic      Atomic             Coordinates (Angstroms)
 Number     Number       Type             X           Y           Z
 ---------------------------------------------------------------------
      1          6           0       -5.051275    0.075387    0.124468
      2          6           0       -4.014022    0.990989    0.102272
      3          6           0       -2.678032    0.558249    0.061080
      4          6           0       -2.402114   -0.829469    0.042427
      5          6           0       -3.469100   -1.744026    0.065222
      6          6           0       -4.778292   -1.301480    0.105788
      7          1           0       -6.077965    0.422974    0.156336
      8          1           0       -4.210566    2.055678    0.116432
      9          1           0       -3.236445   -2.801595    0.050672
     10          1           0       -5.593486   -2.016053    0.122931
     11          6           0       -1.023791   -1.348535    0.000439
     12          8           0       -0.772636   -2.563704   -0.016595
     13          6           0       -1.603610    1.555581    0.038145
     14          6           0        0.048338   -0.352614   -0.020353
     15          6           0       -0.254281    1.091604   -0.002242
     16          6           0        1.366725   -0.763420   -0.057177
     17          6           0        0.836819    2.034564   -0.025698
     18          6           0        2.395219    0.183098   -0.077996
     19          1           0        1.582819   -1.823794   -0.069313
     20          6           0        2.123222    1.609077   -0.061981
     21          1           0        0.592848    3.087989   -0.012851
     22          1           0        2.950290    2.306168   -0.079788
     23         35           0        4.181112   -0.379236   -0.129320
     24          8           0       -1.843277    2.803888    0.053977
 ---------------------------------------------------------------------
                    Distance matrix (angstroms):
                    1          2          3          4          5
     1  C    0.000000
     2  C    1.383731   0.000000
     3  C    2.422696   1.404931   0.000000
     4  C    2.800634   2.432262   1.415005   0.000000
     5  C    2.411856   2.789018   2.434395   1.405488   0.000000
     6  C    1.403791   2.416513   2.805652   2.423434   1.382561
     7  H    1.084400   2.141360   3.403956   3.885031   3.392693
     8  H    2.151374   1.082771   2.143366   3.405884   3.871711
     9  H    3.402364   3.871819   3.405948   2.141368   1.082955
    10  H    2.160583   3.396680   3.889824   3.405777   2.142509
    11  C    4.273589   3.798055   2.525077   1.473420   2.477932
    12  O    5.029061   4.812126   3.658300   2.380389   2.819483
    13  C    3.752974   2.476482   1.466144   2.515171   3.790540
    14  C    5.119591   4.280547   2.875656   2.497208   3.783613
    15  C    4.905089   3.762539   2.482548   2.881961   4.287238
    16  C    6.475131   5.661786   4.256860   3.770734   4.935765
    17  C    6.207300   4.963476   3.813295   4.324120   5.729482
    18  C    7.450024   6.462473   5.089003   4.904508   6.174509
    19  H    6.903306   6.267143   4.883235   4.108632   5.054340
    20  C    7.338963   6.170477   4.916444   5.141602   6.521776
    21  H    6.399278   5.062995   4.135663   4.931464   6.312995
    22  H    8.309221   7.089746   5.895174   6.204465   7.591685
    23  Br   9.247057   8.312122   6.925531   6.600839   7.773432
    24  O    4.211999   2.828616   2.395780   3.676101   4.829799
                    6          7          8          9         10
     6  C    0.000000
     7  H    2.159964   0.000000
     8  H    3.404840   2.480826   0.000000
     9  H    2.151900   4.299214   4.954426   0.000000
    10  H    1.084182   2.486903   4.300175   2.485546   0.000000
    11  C    3.756273   5.357911   4.664510   2.647592   4.619815
    12  O    4.201603   6.090703   5.759839   2.476181   4.853863
    13  C    4.271530   4.616992   2.655644   4.653094   5.355639
    14  C    4.920632   6.177730   4.894573   4.097847   5.883684
    15  C    5.119101   5.864086   4.073783   4.904395   6.179022
    16  C    6.170681   7.541653   6.251690   5.035371   7.074325
    17  C    6.532683   7.102436   5.049430   6.323428   7.601212
    18  C    7.327824   8.479817   6.868824   6.374997   8.288308
    19  H    6.384920   7.986644   6.974820   4.918922   7.181453
    20  C    7.492022   8.289389   6.352020   6.942100   8.527799
    21  H    6.937626   7.185449   4.914790   7.025291   8.021248
    22  H    8.531152   9.225593   7.167922   8.023837   9.576994
    23  Br   9.009813  10.294357   8.741250   7.805150   9.913908
    24  O    5.046884   4.859198   2.483500   5.776016   6.107426
                   11         12         13         14         15
    11  C    0.000000
    12  O    1.240970   0.000000
    13  C    2.961671   4.202621   0.000000
    14  C    1.463473   2.358587   2.524591   0.000000
    15  C    2.558599   3.691907   1.427443   1.475694   0.000000
    16  C    2.461757   2.796343   3.769581   1.381398   2.464101
    17  C    3.861077   4.871807   2.487810   2.514031   1.442299
    18  C    3.747223   4.193328   4.229401   2.407937   2.801959
    19  H    2.650501   2.469497   4.645971   2.126358   3.446590
    20  C    4.319150   5.079386   3.728561   2.855715   2.433900
    21  H    4.721911   5.814310   2.678677   3.483432   2.168708
    22  H    5.399687   6.130239   4.616850   3.936239   3.427894
    23  Br   5.295979   5.415185   6.102014   4.134296   4.674637
    24  O    4.232853   5.473783   1.271206   3.680658   2.336661
                   16         17         18         19         20
    16  C    0.000000
    17  C    2.847896   0.000000
    18  C    1.397902   2.420594   0.000000
    19  H    1.082237   3.930057   2.165106   0.000000
    20  C    2.490192   1.355429   1.451777   3.475154   0.000000
    21  H    3.928639   1.081384   3.419236   5.010872   2.128765
    22  H    3.454065   2.131538   2.194433   4.350480   1.081802
    23  Br   2.841404   4.125707   1.873037   2.973462   2.862312
    24  O    4.800225   2.789467   4.985059   5.759234   4.144170
                   21         22         23         24
    21  H    0.000000
    22  H    2.484604   0.000000
    23  Br   4.991077   2.954449   0.000000
    24  O    2.453546   4.821194   6.816094   0.000000
 Stoichiometry    C14H7BrO2
 Framework group  C1[X(C14H7BrO2)]
 Deg. of freedom    66
 Full point group                 C1      NOp   1
 RotChk:  IX=0 Diff= 1.19D-03
 Largest Abelian subgroup         C1      NOp   1
 Largest concise Abelian subgroup C1      NOp   1
                         Standard orientation:                         
 ---------------------------------------------------------------------
 Center     Atomic      Atomic             Coordinates (Angstroms)
 Number     Number       Type             X           Y           Z
 ---------------------------------------------------------------------
      1          6           0        5.055776    0.085482   -0.003115
      2          6           0        4.015929    0.998405   -0.002262
      3          6           0        2.680441    0.562171   -0.000182
      4          6           0        2.407724   -0.826304    0.001032
      5          6           0        3.477308   -1.738108    0.000389
      6          6           0        4.785964   -1.292136   -0.001716
      7          1           0        6.082046    0.435755   -0.004817
      8          1           0        4.210017    2.063638   -0.003451
      9          1           0        3.247091   -2.796309    0.001046
     10          1           0        5.603176   -2.004607   -0.002050
     11          6           0        1.030123   -1.348970    0.002145
     12          8           0        0.781755   -2.564830    0.003651
     13          6           0        1.603206    1.556727    0.000998
     14          6           0       -0.044759   -0.355803    0.001234
     15          6           0        0.254488    1.089231    0.001688
     16          6           0       -1.362589   -0.770030   -0.000420
     17          6           0       -0.839293    2.029373    0.002547
     18          6           0       -2.393724    0.173839   -0.000485
     19          1           0       -1.576178   -1.830980   -0.001750
     20          6           0       -2.125097    1.600546    0.001107
     21          1           0       -0.597800    3.083446    0.003867
     22          1           0       -2.954152    2.295502    0.001659
     23         35           0       -4.178886   -0.393139   -0.001327
     24          8           0        1.839972    2.805689    0.000621
 ---------------------------------------------------------------------
 Rotational constants (GHZ):      0.9866423      0.1794405      0.1518277
 Leave Link  202 at Sun Jan 12 23:49:48 2020, MaxMem=   134217728 cpu:         0.0
 (Enter E:\Gaussian\G09W\l301.exe)
 Standard basis: 6-311G(d) (5D, 7F)
 Ernie: Thresh=  0.10000D-02 Tol=  0.10000D-05 Strict=F.
 There are   372 symmetry adapted cartesian basis functions of A   symmetry.
 There are   353 symmetry adapted basis functions of A   symmetry.
   353 basis functions,   637 primitive gaussians,   372 cartesian basis functions
    71 alpha electrons       71 beta electrons
       nuclear repulsion energy      1373.5375844666 Hartrees.
 IExCor=  402 DFT=T Ex+Corr=B3LYP ExCW=0 ScaHFX=  0.200000
 ScaDFX=  0.800000  0.720000  1.000000  0.810000 ScalE2=  1.000000  1.000000
 IRadAn=      0 IRanWt=     -1 IRanGd=            0 ICorTp=0 IEmpDi=141
 NAtoms=   24 NActive=   24 NUniq=   24 SFac= 1.00D+00 NAtFMM=   60 NAOKFM=F Big=F
 Integral buffers will be    262144 words long.
 Regular integral format.
 Two-electron integral symmetry is turned on.
 R6Disp:  Grimme-D3(BJ) Dispersion energy=       -0.0619617843 Hartrees.
 Nuclear repulsion after empirical dispersion term =     1373.4756226823 Hartrees.
 ------------------------------------------------------------------------------
 Polarizable Continuum Model (PCM)
 =================================
 Model                : PCM (using non-symmetric T matrix).
 Atomic radii         : UFF (Universal Force Field).
 Polarization charges : Total charges.
 Charge compensation  : None.
 Solution method      : On-the-fly selection.
 Cavity type          : Scaled VdW (van der Waals Surface) (Alpha=1.100).
 Cavity algorithm     : GePol (No added spheres)
                        Default sphere list used, NSphG=   24.
                        Lebedev-Laikov grids with approx.  5.0 points / Ang**2.
                        Smoothing algorithm: Karplus/York (Gamma=1.0000).
                        Polarization charges: spherical gaussians, with
                                              point-specific exponents (IZeta= 3).
                        Self-potential: point-specific (ISelfS= 7).
                        Self-field    : sphere-specific E.n sum rule (ISelfD= 2).
 1st derivatives      : Analytical E(r).r(x)/FMM algorithm (CHGder, D1EAlg=3).
                        Cavity 1st derivative terms included.
 Solvent              : Acetonitrile, Eps=  35.688000 Eps(inf)=   1.806874
 ------------------------------------------------------------------------------
 GePol: Number of generator spheres                  =      24
 GePol: Total number of spheres                      =      24
 GePol: Number of exposed spheres                    =      24 (100.00%)
 GePol: Number of points                             =    2164
 GePol: Average weight of points                     =       0.13
 GePol: Minimum weight of points                     =   0.33D-09
 GePol: Maximum weight of points                     =    0.20577
 GePol: Number of points with low weight             =     125
 GePol: Fraction of low-weight points (<1% of avg)   =       5.78%
 GePol: Cavity surface area                          =    279.843 Ang**2
 GePol: Cavity volume                                =    306.100 Ang**3
 Leave Link  301 at Sun Jan 12 23:49:48 2020, MaxMem=   134217728 cpu:         0.0
 (Enter E:\Gaussian\G09W\l302.exe)
 NPDir=0 NMtPBC=     1 NCelOv=     1 NCel=       1 NClECP=     1 NCelD=      1
         NCelK=      1 NCelE2=     1 NClLst=     1 CellRange=     0.0.
 One-electron integrals computed using PRISM.
 NBasis=   353 RedAO= T EigKep=  9.93D-05  NBF=   353
 NBsUse=   353 1.00D-06 EigRej= -1.00D+00 NBFU=   353
 Precomputing XC quadrature grid using
 IXCGrd= 4 IRadAn=           0 IRanWt=          -1 IRanGd=           0 AccXCQ= 0.00D+00.
 Generated NRdTot=       0 NPtTot=           0 NUsed=           0 NTot=          16
 NSgBfM=   363   363   363   363   363 MxSgAt=    24 MxSgA2=    24.
 Leave Link  302 at Sun Jan 12 23:49:51 2020, MaxMem=   134217728 cpu:         2.0
 (Enter E:\Gaussian\G09W\l308.exe)
 Leave Link  308 at Sun Jan 12 23:49:52 2020, MaxMem=   134217728 cpu:         0.0
 (Enter E:\Gaussian\G09W\l303.exe)
 DipDrv:  MaxL=1.
 Leave Link  303 at Sun Jan 12 23:49:53 2020, MaxMem=   134217728 cpu:         1.0
 (Enter E:\Gaussian\G09W\l401.exe)
 Initial guess from the checkpoint file:  "E:\Gaussian file\error\2-BrAQ excited triplet state opt.chk"
 B after Tr=     0.000000    0.000000    0.000000
         Rot=    1.000000    0.000000    0.000000    0.000019 Ang=   0.00 deg.
 Guess basis will be translated and rotated to current coordinates.
 JPrj=2 DoOrth=T DoCkMO=T.
 Leave Link  401 at Sun Jan 12 23:49:54 2020, MaxMem=   134217728 cpu:         1.0
 (Enter E:\Gaussian\G09W\l502.exe)
 Closed shell SCF:
 Using DIIS extrapolation, IDIIS=  1040.
 Integral symmetry usage will be decided dynamically.
 IVT=      438130 IEndB=      438130 NGot=   134217728 MDV=   133934995
 LenX=   133934995 LenY=   133796170
 Requested convergence on RMS density matrix=1.00D-08 within 128 cycles.
 Requested convergence on MAX density matrix=1.00D-06.
 Requested convergence on             energy=1.00D-06.
 No special actions if energy rises.
 Fock matrices will be formed incrementally for  20 cycles.

 Cycle   1  Pass 1  IDiag  1:
 FoFJK:  IHMeth= 1 ICntrl=       0 DoSepK=F KAlg= 0 I1Cent=   0 FoldK=F
 IRaf= 780000000 NMat=   1 IRICut=       1 DoRegI=T DoRafI=F ISym2E= 0.
 FoFCou: FMM=F IPFlag=           0 FMFlag=      100000 FMFlg1=           0
         NFxFlg=           0 DoJE=F BraDBF=F KetDBF=F FulRan=T
         wScrn=  0.000000 ICntrl=       0 IOpCl=  0 I1Cent=           0 NGrid=           0
         NMat0=    1 NMatS0=      1 NMatT0=    0 NMatD0=    1 NMtDS0=    0 NMtDT0=    0
 Symmetry not used in FoFCou.
 Inv3:  Mode=1 IEnd=    14048688.
 Iteration    1 A*A^-1 deviation from unit magnitude is 3.11D-15 for    964.
 Iteration    1 A*A^-1 deviation from orthogonality  is 3.81D-15 for   1120    806.
 Iteration    1 A^-1*A deviation from unit magnitude is 2.22D-15 for     30.
 Iteration    1 A^-1*A deviation from orthogonality  is 1.37D-13 for   1818   1192.
 E= -3262.52974387403    
 DIIS: error= 4.04D-04 at cycle   1 NSaved=   1.
 NSaved= 1 IEnMin= 1 EnMin= -3262.52974387403     IErMin= 1 ErrMin= 4.04D-04
 ErrMax= 4.04D-04  0.00D+00 EMaxC= 1.00D-01 BMatC= 3.41D-05 BMatP= 3.41D-05
 IDIUse=3 WtCom= 9.96D-01 WtEn= 4.04D-03
 Coeff-Com:  0.100D+01
 Coeff-En:   0.100D+01
 Coeff:      0.100D+01
 Gap=     0.806 Goal=   None    Shift=    0.000
 RMSDP=7.19D-05 MaxDP=1.66D-03              OVMax= 2.07D-03

 Cycle   2  Pass 1  IDiag  1:
 RMSU=  7.18D-05    CP:  1.00D+00
 E= -3262.52980608485     Delta-E=       -0.000062210827 Rises=F Damp=F
 DIIS: error= 6.37D-05 at cycle   2 NSaved=   2.
 NSaved= 2 IEnMin= 2 EnMin= -3262.52980608485     IErMin= 2 ErrMin= 6.37D-05
 ErrMax= 6.37D-05  0.00D+00 EMaxC= 1.00D-01 BMatC= 1.51D-06 BMatP= 3.41D-05
 IDIUse=1 WtCom= 1.00D+00 WtEn= 0.00D+00
 Coeff-Com: -0.131D-01 0.101D+01
 Coeff:     -0.131D-01 0.101D+01
 Gap=     0.129 Goal=   None    Shift=    0.000
 RMSDP=1.21D-05 MaxDP=5.83D-04 DE=-6.22D-05 OVMax= 5.95D-04

 Cycle   3  Pass 1  IDiag  1:
 RMSU=  1.19D-05    CP:  1.00D+00  1.02D+00
 E= -3262.52980451615     Delta-E=        0.000001568701 Rises=F Damp=F
 DIIS: error= 1.43D-04 at cycle   3 NSaved=   3.
 NSaved= 3 IEnMin= 2 EnMin= -3262.52980608485     IErMin= 2 ErrMin= 6.37D-05
 ErrMax= 1.43D-04  0.00D+00 EMaxC= 1.00D-01 BMatC= 4.38D-06 BMatP= 1.51D-06
 IDIUse=3 WtCom= 4.56D-01 WtEn= 5.44D-01
 Coeff-Com: -0.457D-01 0.678D+00 0.368D+00
 Coeff-En:   0.000D+00 0.672D+00 0.328D+00
 Coeff:     -0.208D-01 0.675D+00 0.346D+00
 Gap=     0.129 Goal=   None    Shift=    0.000
 RMSDP=9.62D-06 MaxDP=4.66D-04 DE= 1.57D-06 OVMax= 4.51D-04

 Cycle   4  Pass 1  IDiag  1:
 RMSU=  3.25D-06    CP:  1.00D+00  1.04D+00  2.55D-01
 E= -3262.52980770172     Delta-E=       -0.000003185571 Rises=F Damp=F
 DIIS: error= 2.14D-05 at cycle   4 NSaved=   4.
 NSaved= 4 IEnMin= 4 EnMin= -3262.52980770172     IErMin= 4 ErrMin= 2.14D-05
 ErrMax= 2.14D-05  0.00D+00 EMaxC= 1.00D-01 BMatC= 9.53D-08 BMatP= 1.51D-06
 IDIUse=1 WtCom= 1.00D+00 WtEn= 0.00D+00
 Coeff-Com: -0.157D-01 0.164D+00 0.161D+00 0.690D+00
 Coeff:     -0.157D-01 0.164D+00 0.161D+00 0.690D+00
 Gap=     0.129 Goal=   None    Shift=    0.000
 RMSDP=1.42D-06 MaxDP=5.59D-05 DE=-3.19D-06 OVMax= 6.74D-05

 Cycle   5  Pass 1  IDiag  1:
 RMSU=  7.48D-07    CP:  1.00D+00  1.04D+00  3.46D-01  8.49D-01
 E= -3262.52980777289     Delta-E=       -0.000000071168 Rises=F Damp=F
 DIIS: error= 5.77D-06 at cycle   5 NSaved=   5.
 NSaved= 5 IEnMin= 5 EnMin= -3262.52980777289     IErMin= 5 ErrMin= 5.77D-06
 ErrMax= 5.77D-06  0.00D+00 EMaxC= 1.00D-01 BMatC= 1.08D-08 BMatP= 9.53D-08
 IDIUse=1 WtCom= 1.00D+00 WtEn= 0.00D+00
 Coeff-Com: -0.506D-02 0.410D-01 0.608D-01 0.351D+00 0.552D+00
 Coeff:     -0.506D-02 0.410D-01 0.608D-01 0.351D+00 0.552D+00
 Gap=     0.129 Goal=   None    Shift=    0.000
 RMSDP=3.23D-07 MaxDP=1.70D-05 DE=-7.12D-08 OVMax= 3.53D-05

 Cycle   6  Pass 1  IDiag  1:
 RMSU=  2.75D-07    CP:  1.00D+00  1.04D+00  3.46D-01  8.85D-01  8.43D-01
 E= -3262.52980778233     Delta-E=       -0.000000009437 Rises=F Damp=F
 DIIS: error= 1.88D-06 at cycle   6 NSaved=   6.
 NSaved= 6 IEnMin= 6 EnMin= -3262.52980778233     IErMin= 6 ErrMin= 1.88D-06
 ErrMax= 1.88D-06  0.00D+00 EMaxC= 1.00D-01 BMatC= 1.56D-09 BMatP= 1.08D-08
 IDIUse=1 WtCom= 1.00D+00 WtEn= 0.00D+00
 Coeff-Com:  0.499D-03-0.144D-01-0.808D-03 0.536D-01 0.295D+00 0.666D+00
 Coeff:      0.499D-03-0.144D-01-0.808D-03 0.536D-01 0.295D+00 0.666D+00
 Gap=     0.129 Goal=   None    Shift=    0.000
 RMSDP=1.56D-07 MaxDP=7.47D-06 DE=-9.44D-09 OVMax= 1.88D-05

 Cycle   7  Pass 1  IDiag  1:
 RMSU=  1.00D-07    CP:  1.00D+00  1.04D+00  3.50D-01  9.01D-01  9.24D-01
                    CP:  7.36D-01
 E= -3262.52980778379     Delta-E=       -0.000000001458 Rises=F Damp=F
 DIIS: error= 9.52D-07 at cycle   7 NSaved=   7.
 NSaved= 7 IEnMin= 7 EnMin= -3262.52980778379     IErMin= 7 ErrMin= 9.52D-07
 ErrMax= 9.52D-07  0.00D+00 EMaxC= 1.00D-01 BMatC= 3.01D-10 BMatP= 1.56D-09
 IDIUse=1 WtCom= 1.00D+00 WtEn= 0.00D+00
 Coeff-Com:  0.759D-03-0.130D-01-0.641D-02 0.143D-02 0.133D+00 0.412D+00
 Coeff-Com:  0.473D+00
 Coeff:      0.759D-03-0.130D-01-0.641D-02 0.143D-02 0.133D+00 0.412D+00
 Coeff:      0.473D+00
 Gap=     0.129 Goal=   None    Shift=    0.000
 RMSDP=5.94D-08 MaxDP=2.13D-06 DE=-1.46D-09 OVMax= 8.67D-06

 Cycle   8  Pass 1  IDiag  1:
 RMSU=  4.61D-08    CP:  1.00D+00  1.04D+00  3.50D-01  9.06D-01  9.30D-01
                    CP:  8.25D-01  7.75D-01
 E= -3262.52980778413     Delta-E=       -0.000000000347 Rises=F Damp=F
 DIIS: error= 2.78D-07 at cycle   8 NSaved=   8.
 NSaved= 8 IEnMin= 8 EnMin= -3262.52980778413     IErMin= 8 ErrMin= 2.78D-07
 ErrMax= 2.78D-07  0.00D+00 EMaxC= 1.00D-01 BMatC= 1.90D-11 BMatP= 3.01D-10
 IDIUse=1 WtCom= 1.00D+00 WtEn= 0.00D+00
 Coeff-Com:  0.278D-03-0.398D-02-0.308D-02-0.733D-02 0.188D-01 0.990D-01
 Coeff-Com:  0.226D+00 0.670D+00
 Coeff:      0.278D-03-0.398D-02-0.308D-02-0.733D-02 0.188D-01 0.990D-01
 Coeff:      0.226D+00 0.670D+00
 Gap=     0.129 Goal=   None    Shift=    0.000
 RMSDP=2.94D-08 MaxDP=8.71D-07 DE=-3.47D-10 OVMax= 2.72D-06

 Cycle   9  Pass 1  IDiag  1:
 RMSU=  2.10D-08    CP:  1.00D+00  1.04D+00  3.49D-01  9.08D-01  9.39D-01
                    CP:  8.38D-01  8.65D-01  7.66D-01
 E= -3262.52980778421     Delta-E=       -0.000000000076 Rises=F Damp=F
 DIIS: error= 1.27D-07 at cycle   9 NSaved=   9.
 NSaved= 9 IEnMin= 9 EnMin= -3262.52980778421     IErMin= 9 ErrMin= 1.27D-07
 ErrMax= 1.27D-07  0.00D+00 EMaxC= 1.00D-01 BMatC= 3.76D-12 BMatP= 1.90D-11
 IDIUse=1 WtCom= 1.00D+00 WtEn= 0.00D+00
 Coeff-Com:  0.204D-04 0.210D-03-0.533D-03-0.412D-02-0.131D-01-0.188D-01
 Coeff-Com:  0.371D-01 0.357D+00 0.642D+00
 Coeff:      0.204D-04 0.210D-03-0.533D-03-0.412D-02-0.131D-01-0.188D-01
 Coeff:      0.371D-01 0.357D+00 0.642D+00
 Gap=     0.129 Goal=   None    Shift=    0.000
 RMSDP=1.22D-08 MaxDP=3.73D-07 DE=-7.64D-11 OVMax= 1.31D-06

 Cycle  10  Pass 1  IDiag  1:
 RMSU=  4.43D-09    CP:  1.00D+00  1.04D+00  3.49D-01  9.08D-01  9.41D-01
                    CP:  8.47D-01  9.05D-01  9.35D-01  7.37D-01
 E= -3262.52980778420     Delta-E=        0.000000000007 Rises=F Damp=F
 DIIS: error= 4.49D-08 at cycle  10 NSaved=  10.
 NSaved=10 IEnMin= 9 EnMin= -3262.52980778421     IErMin=10 ErrMin= 4.49D-08
 ErrMax= 4.49D-08  0.00D+00 EMaxC= 1.00D-01 BMatC= 5.02D-13 BMatP= 3.76D-12
 IDIUse=1 WtCom= 1.00D+00 WtEn= 0.00D+00
 Coeff-Com: -0.206D-04 0.585D-03 0.763D-04-0.151D-02-0.922D-02-0.212D-01
 Coeff-Com: -0.418D-02 0.120D+00 0.338D+00 0.578D+00
 Coeff:     -0.206D-04 0.585D-03 0.763D-04-0.151D-02-0.922D-02-0.212D-01
 Coeff:     -0.418D-02 0.120D+00 0.338D+00 0.578D+00
 Gap=     0.129 Goal=   None    Shift=    0.000
 RMSDP=3.93D-09 MaxDP=1.68D-07 DE= 7.28D-12 OVMax= 3.84D-07

 Error on total polarization charges =  0.01375
 SCF Done:  E(RB3LYP) =  -3262.52980778     A.U. after   10 cycles
            NFock= 10  Conv=0.39D-08     -V/T= 2.0018
 KE= 3.256591739343D+03 PE=-1.050304000964D+04 EE= 2.610442839827D+03
 Leave Link  502 at Mon Jan 13 00:00:10 2020, MaxMem=   134217728 cpu:       616.0
 (Enter E:\Gaussian\G09W\l801.exe)
 DoSCS=F DFT=T ScalE2(SS,OS)=  1.000000  1.000000
 ExpMin= 1.03D-01 ExpMax= 4.40D+05 ExpMxC= 1.51D+04 IAcc=3 IRadAn=         5 AccDes= 0.00D+00
 HarFok:  IExCor=  205 AccDes= 0.00D+00 IRadAn=         5 IDoV=-2 UseB2=F ITyADJ=14
 ICtDFT= 12500011 ScaDFX=  1.000000  1.000000  1.000000  1.000000
 Largest valence mixing into a core orbital is  2.38D-04
 Largest core mixing into a valence orbital is  1.99D-05
 Range of M.O.s used for correlation:    31   353
 NBasis=   353 NAE=    71 NBE=    71 NFC=    30 NFV=     0
 NROrb=    323 NOA=    41 NOB=    41 NVA=   282 NVB=   282

 **** Warning!!: The largest alpha MO coefficient is  0.26314645D+02

 Leave Link  801 at Mon Jan 13 00:00:13 2020, MaxMem=   134217728 cpu:         3.0
 (Enter E:\Gaussian\G09W\l914.exe)
 RHF ground state
 MDV=   134217728 DFT=T DoStab=F Mixed=T DoRPA=T DoScal=F NonHer=T
 NEqPCM:  Using equilibrium solvation (IEInf=0, Eps=  35.6880, EpsInf=   1.8069)
 Making orbital integer symmetry assigments:
 Orbital symmetries:
       Occupied  (A) (A) (A) (A) (A) (A) (A) (A) (A) (A) (A) (A)
                 (A) (A) (A) (A) (A) (A) (A) (A) (A) (A) (A) (A)
                 (A) (A) (A) (A) (A) (A) (A) (A) (A) (A) (A) (A)
                 (A) (A) (A) (A) (A) (A) (A) (A) (A) (A) (A) (A)
                 (A) (A) (A) (A) (A) (A) (A) (A) (A) (A) (A) (A)
                 (A) (A) (A) (A) (A) (A) (A) (A) (A) (A) (A)
       Virtual   (A) (A) (A) (A) (A) (A) (A) (A) (A) (A) (A) (A)
                 (A) (A) (A) (A) (A) (A) (A) (A) (A) (A) (A) (A)
                 (A) (A) (A) (A) (A) (A) (A) (A) (A) (A) (A) (A)
                 (A) (A) (A) (A) (A) (A) (A) (A) (A) (A) (A) (A)
                 (A) (A) (A) (A) (A) (A) (A) (A) (A) (A) (A) (A)
                 (A) (A) (A) (A) (A) (A) (A) (A) (A) (A) (A) (A)
                 (A) (A) (A) (A) (A) (A) (A) (A) (A) (A) (A) (A)
                 (A) (A) (A) (A) (A) (A) (A) (A) (A) (A) (A) (A)
                 (A) (A) (A) (A) (A) (A) (A) (A) (A) (A) (A) (A)
                 (A) (A) (A) (A) (A) (A) (A) (A) (A) (A) (A) (A)
                 (A) (A) (A) (A) (A) (A) (A) (A) (A) (A) (A) (A)
                 (A) (A) (A) (A) (A) (A) (A) (A) (A) (A) (A) (A)
                 (A) (A) (A) (A) (A) (A) (A) (A) (A) (A) (A) (A)
                 (A) (A) (A) (A) (A) (A) (A) (A) (A) (A) (A) (A)
                 (A) (A) (A) (A) (A) (A) (A) (A) (A) (A) (A) (A)
                 (A) (A) (A) (A) (A) (A) (A) (A) (A) (A) (A) (A)
                 (A) (A) (A) (A) (A) (A) (A) (A) (A) (A) (A) (A)
                 (A) (A) (A) (A) (A) (A) (A) (A) (A) (A) (A) (A)
                 (A) (A) (A) (A) (A) (A) (A) (A) (A) (A) (A) (A)
                 (A) (A) (A) (A) (A) (A) (A) (A) (A) (A) (A) (A)
                 (A) (A) (A) (A) (A) (A) (A) (A) (A) (A) (A) (A)
                 (A) (A) (A) (A) (A) (A) (A) (A) (A) (A) (A) (A)
                 (A) (A) (A) (A) (A) (A) (A) (A) (A) (A) (A) (A)
                 (A) (A) (A) (A) (A) (A)
 Generating guess from densities on rwf.
 Convergence on wavefunction:    0.000001000000000
 Davidson Disk Diagonalization:  ConvIn= 1.00D-06 SkipCon=T Conv= 1.00D-06.
 Max sub-space:   200 roots to seek:     5 dimension of matrix:        23124
 Iteration     1 Dimension    10 NMult     0 NNew     10
 CISAX will form    10 AO SS matrices at one time.
 NMat=    10 NSing=     0 JSym2X= 0.
 FoFJK:  IHMeth= 1 ICntrl=       0 DoSepK=F KAlg= 0 I1Cent=   0 FoldK=F
 IRaf=         0 NMat=  20 IRICut=       1 DoRegI=T DoRafI=F ISym2E= 0.
 FoFCou: FMM=F IPFlag=           0 FMFlag=      100000 FMFlg1=           0
         NFxFlg=           0 DoJE=F BraDBF=F KetDBF=F FulRan=T
         wScrn=  0.000000 ICntrl=       0 IOpCl=  0 I1Cent=           0 NGrid=           0
         NMat0=   20 NMatS0=      0 NMatT0=   10 NMatD0=   20 NMtDS0=    0 NMtDT0=    0
 Symmetry not used in FoFCou.
 Excitation Energies [eV] at current iteration:
 Root      1 :     2.079829841494566
 Root      2 :     2.310282836041008
 Root      3 :     2.550658538665339
 Root      4 :     2.575956074518652
 Root      5 :     2.761346650018501
 Iteration     2 Dimension    20 NMult    10 NNew     10
 CISAX will form    10 AO SS matrices at one time.
 NMat=    10 NSing=     0 JSym2X= 0.
 Root      1 not converged, maximum delta is    0.002508364562996
 Root      2 not converged, maximum delta is    0.000896144856158
 Root      3 not converged, maximum delta is    0.001928963557365
 Root      4 not converged, maximum delta is    0.001885290300782
 Root      5 not converged, maximum delta is    0.000793999042280
 Excitation Energies [eV] at current iteration:
 Root      1 :     2.079551896289777   Change is   -0.000277945204789
 Root      2 :     2.310163204232307   Change is   -0.000119631808701
 Root      3 :     2.550515890264473   Change is   -0.000142648400866
 Root      4 :     2.575786213297953   Change is   -0.000169861220699
 Root      5 :     2.761188907165689   Change is   -0.000157742852812
 Iteration     3 Dimension    30 NMult    20 NNew     10
 CISAX will form    10 AO SS matrices at one time.
 NMat=    10 NSing=     0 JSym2X= 0.
 Root      1 not converged, maximum delta is    0.000271160877212
 Root      2 not converged, maximum delta is    0.000221600395826
 Root      3 not converged, maximum delta is    0.001811035448661
 Root      4 not converged, maximum delta is    0.000470929750271
 Root      5 not converged, maximum delta is    0.000635082246114
 Excitation Energies [eV] at current iteration:
 Root      1 :     2.079544642112074   Change is   -0.000007254177703
 Root      2 :     2.310160832368331   Change is   -0.000002371863976
 Root      3 :     2.550504238382640   Change is   -0.000011651881833
 Root      4 :     2.575781601884930   Change is   -0.000004611413024
 Root      5 :     2.761183752439654   Change is   -0.000005154726034
 Iteration     4 Dimension    40 NMult    30 NNew     10
 CISAX will form    10 AO SS matrices at one time.
 NMat=    10 NSing=     0 JSym2X= 0.
 Root      1 not converged, maximum delta is    0.000037646287813
 Root      2 not converged, maximum delta is    0.000054783529729
 Root      3 not converged, maximum delta is    0.000658855990311
 Root      4 not converged, maximum delta is    0.000202557260396
 Root      5 not converged, maximum delta is    0.000408990828681
 Excitation Energies [eV] at current iteration:
 Root      1 :     2.079544419303543   Change is   -0.000000222808531
 Root      2 :     2.310160681634663   Change is   -0.000000150733668
 Root      3 :     2.550502208125395   Change is   -0.000002030257245
 Root      4 :     2.575781272874500   Change is   -0.000000329010430
 Root      5 :     2.761183085860747   Change is   -0.000000666578907
 Iteration     5 Dimension    50 NMult    40 NNew     10
 CISAX will form    10 AO SS matrices at one time.
 NMat=    10 NSing=     0 JSym2X= 0.
 Root      1 not converged, maximum delta is    0.000010722082342
 Root      2 not converged, maximum delta is    0.000006767069489
 Root      3 not converged, maximum delta is    0.000046525257028
 Root      4 not converged, maximum delta is    0.000023901983627
 Root      5 not converged, maximum delta is    0.000054167184203
 Excitation Energies [eV] at current iteration:
 Root      1 :     2.079544408483890   Change is   -0.000000010819653
 Root      2 :     2.310160674832056   Change is   -0.000000006802607
 Root      3 :     2.550502101473096   Change is   -0.000000106652299
 Root      4 :     2.575781246795942   Change is   -0.000000026078557
 Root      5 :     2.761183015180225   Change is   -0.000000070680522
 Iteration     6 Dimension    60 NMult    50 NNew     10
 CISAX will form    10 AO SS matrices at one time.
 NMat=    10 NSing=     0 JSym2X= 0.
 Root      1 not converged, maximum delta is    0.000001884581996
 Root      2 not converged, maximum delta is    0.000001960574586
 Root      3 not converged, maximum delta is    0.000006086965457
 Root      4 not converged, maximum delta is    0.000003309251805
 Root      5 not converged, maximum delta is    0.000006168267646
 Excitation Energies [eV] at current iteration:
 Root      1 :     2.079544407967608   Change is   -0.000000000516282
 Root      2 :     2.310160674457771   Change is   -0.000000000374285
 Root      3 :     2.550502095626746   Change is   -0.000000005846350
 Root      4 :     2.575781244914169   Change is   -0.000000001881774
 Root      5 :     2.761183009175664   Change is   -0.000000006004562
 Iteration     7 Dimension    70 NMult    60 NNew     10
 CISAX will form    10 AO SS matrices at one time.
 NMat=    10 NSing=     0 JSym2X= 0.
 Root      1 has converged.
 Root      2 has converged.
 Root      3 not converged, maximum delta is    0.000001595366883
 Root      4 has converged.
 Root      5 not converged, maximum delta is    0.000001454436357
 Excitation Energies [eV] at current iteration:
 Root      1 :     2.079544407948436   Change is   -0.000000000019172
 Root      2 :     2.310160674439800   Change is   -0.000000000017971
 Root      3 :     2.550502095359930   Change is   -0.000000000266816
 Root      4 :     2.575781244813539   Change is   -0.000000000100630
 Root      5 :     2.761183008817053   Change is   -0.000000000358611
 Iteration     8 Dimension    74 NMult    70 NNew      4
 CISAX will form     4 AO SS matrices at one time.
 NMat=     4 NSing=     0 JSym2X= 0.
 Root      1 has converged.
 Root      2 has converged.
 Root      3 has converged.
 Root      4 has converged.
 Root      5 has converged.
 Excitation Energies [eV] at current iteration:
 Root      1 :     2.079544407939818   Change is   -0.000000000008618
 Root      2 :     2.310160674439409   Change is   -0.000000000000391
 Root      3 :     2.550502095346683   Change is   -0.000000000013247
 Root      4 :     2.575781244810443   Change is   -0.000000000003096
 Root      5 :     2.761183008793146   Change is   -0.000000000023907
 Convergence achieved on expansion vectors.
 ***********************************************************************
 Excited states from <AA,BB:AA,BB> singles matrix:
 ***********************************************************************
 
 1PDM for each excited state written to RWF  633
 Ground to excited state transition densities written to RWF  633
 Ground to excited state transition electric dipole moments (Au):
       state          X           Y           Z        Dip. S.      Osc.
         1         0.0000      0.0000      0.0000      0.0000      0.0000
         2         0.0000      0.0000      0.0000      0.0000      0.0000
         3         0.0000      0.0000      0.0000      0.0000      0.0000
         4         0.0000      0.0000      0.0000      0.0000      0.0000
         5         0.0000      0.0000      0.0000      0.0000      0.0000
 Ground to excited state transition velocity dipole moments (Au):
       state          X           Y           Z        Dip. S.      Osc.
         1         0.0000      0.0000      0.0000      0.0000      0.0000
         2         0.0000      0.0000      0.0000      0.0000      0.0000
         3         0.0000      0.0000      0.0000      0.0000      0.0000
         4         0.0000      0.0000      0.0000      0.0000      0.0000
         5         0.0000      0.0000      0.0000      0.0000      0.0000
 Ground to excited state transition magnetic dipole moments (Au):
       state          X           Y           Z
         1         0.0000      0.0000      0.0000
         2         0.0000      0.0000      0.0000
         3         0.0000      0.0000      0.0000
         4         0.0000      0.0000      0.0000
         5         0.0000      0.0000      0.0000
 Ground to excited state transition velocity quadrupole moments (Au):
       state          XX          YY          ZZ          XY          XZ          YZ
         1         0.0000      0.0000      0.0000      0.0000      0.0000      0.0000
         2         0.0000      0.0000      0.0000      0.0000      0.0000      0.0000
         3         0.0000      0.0000      0.0000      0.0000      0.0000      0.0000
         4         0.0000      0.0000      0.0000      0.0000      0.0000      0.0000
         5         0.0000      0.0000      0.0000      0.0000      0.0000      0.0000
 <0|del|b> * <b|rxdel|0> + <0|del|b> * <b|delr+rdel|0>
 Rotatory Strengths (R) in cgs (10**-40 erg-esu-cm/Gauss)
       state          XX          YY          ZZ    R(velocity)    E-M Angle
         1         0.0000      0.0000      0.0000      0.0000       90.00
         2         0.0000      0.0000      0.0000      0.0000       90.00
         3         0.0000      0.0000      0.0000      0.0000       90.00
         4         0.0000      0.0000      0.0000      0.0000       90.00
         5         0.0000      0.0000      0.0000      0.0000       90.00
 1/2[<0|r|b>*<b|rxdel|0> + (<0|rxdel|b>*<b|r|0>)*]
 Rotatory Strengths (R) in cgs (10**-40 erg-esu-cm/Gauss)
       state          XX          YY          ZZ     R(length)
         1         0.0000      0.0000      0.0000      0.0000
         2         0.0000      0.0000      0.0000      0.0000
         3         0.0000      0.0000      0.0000      0.0000
         4         0.0000      0.0000      0.0000      0.0000
         5         0.0000      0.0000      0.0000      0.0000
  1/2[<0|del|b>*<b|r|0> + (<0|r|b>*<b|del|0>)*] (Au)
       state          X           Y           Z        Dip. S.   Osc.(frdel)
         1         0.0000      0.0000      0.0000      0.0000      0.0000
         2         0.0000      0.0000      0.0000      0.0000      0.0000
         3         0.0000      0.0000      0.0000      0.0000      0.0000
         4         0.0000      0.0000      0.0000      0.0000      0.0000
         5         0.0000      0.0000      0.0000      0.0000      0.0000

 Excitation energies and oscillator strengths:
 
 Excited State   1:      Triplet-A      2.0795 eV  596.21 nm  f=0.0000  <S**2>=2.000
      64 -> 72        -0.15439
      66 -> 72         0.11852
      68 -> 72         0.14254
      71 -> 72         0.63691
      71 -> 74         0.12823
 This state for optimization and/or second-order correction.
 Total Energy, E(TD-HF/TD-KS) =  -3262.45338593    
 Copying the excited state density for this state as the 1-particle RhoCI density.
 
 Excited State   2:      Triplet-A      2.3102 eV  536.69 nm  f=0.0000  <S**2>=2.000
      70 -> 72         0.68205
 
 Excited State   3:      Triplet-A      2.5505 eV  486.12 nm  f=0.0000  <S**2>=2.000
      67 -> 72        -0.67217
      67 -> 73         0.12290
      70 -> 73        -0.12615
 
 Excited State   4:      Triplet-A      2.5758 eV  481.35 nm  f=0.0000  <S**2>=2.000
      66 -> 72         0.16458
      68 -> 72         0.56008
      68 -> 74        -0.13392
      69 -> 72        -0.22253
      69 -> 73        -0.12581
      71 -> 72        -0.21477
 
 Excited State   5:      Triplet-A      2.7612 eV  449.03 nm  f=0.0000  <S**2>=2.000
      66 -> 72         0.24289
      68 -> 72         0.14945
      69 -> 72         0.62234
 SavETr:  write IOETrn=   770 NScale= 10 NData=  16 NLR=1 NState=    5 LETran=      96.
 The selected state is a triplet
 CISAX will form     1 AO SS matrices at one time.
 NMat=     1 NSing=     0 JSym2X= 0.
 CISAX will form     1 AO SS matrices at one time.
 NMat=     1 NSing=     0 JSym2X= 0.
 Leave Link  914 at Mon Jan 13 00:44:32 2020, MaxMem=   134217728 cpu:      2659.0
 (Enter E:\Gaussian\G09W\l1002.exe)
 Minotr:  Closed shell wavefunction.
          Computing CIS/TD-HF/TD-KS derivatives.
          Using Z-Vector for PSCF gradient.
          Skipping F1 and S1 gradient terms here.
          IDoAtm=111111111111111111111111
 NEqPCM:  Using equilibrium solvation (IEInf=0, Eps=  35.6880, EpsInf=   1.8069)
          Frozen-core window.
          Direct CPHF calculation.
          Differentiating once with respect to electric field.
                with respect to dipole field.
          Differentiating once with respect to nuclear coordinates.
          Requested convergence is 1.0D-10 RMS, and 1.0D-09 maximum.
          NewPWx=F KeepS1=T KeepF1=T KeepIn=T MapXYZ=F SortEE=F KeepMc=T.
          MDV=     134217394 using IRadAn=       0.
 Using stored XC quadrature information.
          Solving linear equations separately, MaxMat=       0.
          There are     1 degrees of freedom in the 1st order CPHF.  IDoFFX=0 NUNeed=     1.
 FoFJK:  IHMeth= 1 ICntrl=       0 DoSepK=F KAlg= 0 I1Cent=   0 FoldK=F
 IRaf= 800000000 NMat=   1 IRICut=       1 DoRegI=T DoRafI=F ISym2E=-1.
 FoFCou: FMM=F IPFlag=           0 FMFlag=      100000 FMFlg1=           0
         NFxFlg=           0 DoJE=F BraDBF=F KetDBF=F FulRan=T
         wScrn=  0.000000 ICntrl=       0 IOpCl=  0 I1Cent=           0 NGrid=           0
         NMat0=    1 NMatS0=      1 NMatT0=    0 NMatD0=    1 NMtDS0=    0 NMtDT0=    0
 Petite list used in FoFCou.
 LinEq1:  Iter=  0 NonCon=     1 RMS=3.49D-03 Max=1.87D-01 NDo=     1
 AX will form     1 AO Fock derivatives at one time.
 LinEq1:  Iter=  1 NonCon=     1 RMS=2.39D-03 Max=1.24D-01 NDo=     1
 LinEq1:  Iter=  2 NonCon=     1 RMS=1.87D-03 Max=8.06D-02 NDo=     1
 LinEq1:  Iter=  3 NonCon=     1 RMS=1.02D-03 Max=4.72D-02 NDo=     1
 LinEq1:  Iter=  4 NonCon=     1 RMS=6.30D-04 Max=3.97D-02 NDo=     1
 LinEq1:  Iter=  5 NonCon=     1 RMS=4.12D-04 Max=1.59D-02 NDo=     1
 LinEq1:  Iter=  6 NonCon=     1 RMS=2.80D-04 Max=1.08D-02 NDo=     1
 LinEq1:  Iter=  7 NonCon=     1 RMS=1.93D-04 Max=8.30D-03 NDo=     1
 LinEq1:  Iter=  8 NonCon=     1 RMS=1.19D-04 Max=6.64D-03 NDo=     1
 LinEq1:  Iter=  9 NonCon=     1 RMS=9.47D-05 Max=3.55D-03 NDo=     1
 LinEq1:  Iter= 10 NonCon=     1 RMS=5.96D-05 Max=2.10D-03 NDo=     1
 LinEq1:  Iter= 11 NonCon=     1 RMS=3.48D-05 Max=9.07D-04 NDo=     1
 LinEq1:  Iter= 12 NonCon=     1 RMS=1.55D-05 Max=3.44D-04 NDo=     1
 LinEq1:  Iter= 13 NonCon=     1 RMS=7.13D-06 Max=1.85D-04 NDo=     1
 LinEq1:  Iter= 14 NonCon=     1 RMS=3.46D-06 Max=8.85D-05 NDo=     1
 LinEq1:  Iter= 15 NonCon=     1 RMS=1.54D-06 Max=4.34D-05 NDo=     1
 LinEq1:  Iter= 16 NonCon=     1 RMS=7.45D-07 Max=2.57D-05 NDo=     1
 LinEq1:  Iter= 17 NonCon=     1 RMS=4.41D-07 Max=1.29D-05 NDo=     1
 LinEq1:  Iter= 18 NonCon=     1 RMS=2.23D-07 Max=6.27D-06 NDo=     1
 LinEq1:  Iter= 19 NonCon=     1 RMS=1.21D-07 Max=4.44D-06 NDo=     1
 LinEq1:  Iter= 20 NonCon=     1 RMS=4.62D-08 Max=1.88D-06 NDo=     1
 LinEq1:  Iter= 21 NonCon=     1 RMS=2.59D-08 Max=1.10D-06 NDo=     1
 LinEq1:  Iter= 22 NonCon=     1 RMS=1.28D-08 Max=5.99D-07 NDo=     1
 LinEq1:  Iter= 23 NonCon=     1 RMS=8.80D-09 Max=4.76D-07 NDo=     1
 LinEq1:  Iter= 24 NonCon=     1 RMS=3.99D-09 Max=1.25D-07 NDo=     1
 LinEq1:  Iter= 25 NonCon=     1 RMS=2.40D-09 Max=9.15D-08 NDo=     1
 LinEq1:  Iter= 26 NonCon=     1 RMS=9.01D-10 Max=2.70D-08 NDo=     1
 LinEq1:  Iter= 27 NonCon=     1 RMS=2.64D-10 Max=8.09D-09 NDo=     1
 LinEq1:  Iter= 28 NonCon=     1 RMS=1.47D-10 Max=5.93D-09 NDo=     1
 LinEq1:  Iter= 29 NonCon=     1 RMS=7.49D-11 Max=1.91D-09 NDo=     1
 LinEq1:  Iter= 30 NonCon=     0 RMS=1.69D-11 Max=4.70D-10 NDo=     1
 Linear equations converged to 1.000D-10 1.000D-09 after    30 iterations.
 End of Minotr F.D. properties file   721 does not exist.
 End of Minotr F.D. properties file   722 does not exist.
 End of Minotr F.D. properties file   788 does not exist.
 Leave Link 1002 at Mon Jan 13 01:19:34 2020, MaxMem=   134217728 cpu:      2101.0
 (Enter E:\Gaussian\G09W\l701.exe)
 Compute integral first derivatives.
 ... and contract with generalized density number  6.
 R6Disp: Adding Grimme-D3(BJ) dispersion energy 1st derivatives to the gradient.
 D1PCM: PCM CHGder 1st derivatives, ID1Alg=3 FixD1E=F DoIter=F DoCFld=F I1PDM=6.
 GePol: Maximum number of non-zero 1st derivatives   =     350
 Leave Link  701 at Mon Jan 13 01:20:24 2020, MaxMem=   134217728 cpu:        49.0
 (Enter E:\Gaussian\G09W\l702.exe)
 L702 exits ... SP integral derivatives will be done elsewhere.
 Leave Link  702 at Mon Jan 13 01:20:25 2020, MaxMem=   134217728 cpu:         0.0
 (Enter E:\Gaussian\G09W\l703.exe)
 Compute integral first derivatives, UseDBF=F ICtDFT=           0.
 Integral derivatives from FoFJK, PRISM(SPDF).
 Calling FoFJK, ICntrl=  10005127 FMM=F ISym2X=0 I1Cent= 0 IOpClX= 0 NMat=1 NMatS=1 NMatT=0.
 FoFJK:  IHMeth= 1 ICntrl=10005127 DoSepK=F KAlg= 0 I1Cent=   0 FoldK=F
 IRaf=         0 NMat=   1 IRICut=       1 DoRegI=T DoRafI=F ISym2E= 0.
 FoFCou: FMM=F IPFlag=           0 FMFlag=      100000 FMFlg1=         800
         NFxFlg=           0 DoJE=F BraDBF=F KetDBF=F FulRan=T
         wScrn=  0.000000 ICntrl=10005127 IOpCl=  0 I1Cent=           0 NGrid=           0
         NMat0=    1 NMatS0=      1 NMatT0=    0 NMatD0=    1 NMtDS0=    0 NMtDT0=    0
 Symmetry not used in FoFCou.
 Leave Link  703 at Mon Jan 13 01:24:33 2020, MaxMem=   134217728 cpu:       248.0
 (Enter E:\Gaussian\G09W\l716.exe)
 Dipole        =-1.39803380D+00 5.06896356D-01-2.72605951D-03
 ***** Axes restored to original set *****
 -------------------------------------------------------------------
 Center     Atomic                   Forces (Hartrees/Bohr)
 Number     Number              X              Y              Z
 -------------------------------------------------------------------
      1        6           0.000019354    0.000057791   -0.000009287
      2        6          -0.000079329   -0.000021270    0.000017730
      3        6          -0.000028419    0.000119094   -0.000038452
      4        6           0.000117847   -0.000164964    0.000027446
      5        6          -0.000089642    0.000088116    0.000037307
      6        6           0.000054267   -0.000052635   -0.000035254
      7        1           0.000013345   -0.000021798    0.000000736
      8        1           0.000009060   -0.000014303   -0.000014444
      9        1           0.000026553    0.000023213   -0.000018205
     10        1           0.000009126   -0.000011442    0.000015249
     11        6          -0.000077650    0.000203087   -0.000032742
     12        8           0.000026317   -0.000107810    0.000027556
     13        6          -0.000128989    0.000008789    0.000075047
     14        6          -0.000036500    0.000028062    0.000021283
     15        6           0.000187310   -0.000117977   -0.000040234
     16        6          -0.000018219    0.000006162    0.000005607
     17        6          -0.000055364    0.000118136    0.000039688
     18        6          -0.000070308    0.000208644   -0.000002439
     19        1          -0.000023609    0.000036145   -0.000028743
     20        6           0.000077181   -0.000154752   -0.000049627
     21        1          -0.000001089   -0.000030205    0.000007613
     22        1          -0.000028580    0.000011398    0.000010627
     23       35           0.000061601   -0.000034423    0.000011451
     24        8           0.000035737   -0.000177058   -0.000027912
 -------------------------------------------------------------------
 Cartesian Forces:  Max     0.000208644 RMS     0.000072318
 Leave Link  716 at Mon Jan 13 01:24:34 2020, MaxMem=   134217728 cpu:         0.0
 (Enter E:\Gaussian\G09W\l103.exe)

 GradGradGradGradGradGradGradGradGradGradGradGradGradGradGradGradGradGrad
 Berny optimization.
 Using GEDIIS/GDIIS optimizer.
 FormGI is forming the generalized inverse of G from B-inverse, IUseBI=4.
 Internal  Forces:  Max     0.000180884 RMS     0.000036764
 Search for a local minimum.
 Step number   6 out of a maximum of  142
 All quantities printed in internal units (Hartrees-Bohrs-Radians)
 RMS Force = .36764D-04 SwitMx=.10000D-02 MixMth= 2
 Mixed Optimization -- En-DIIS/RFO-DIIS
 Swapping is turned off.
 Update second derivatives using D2CorX and points    1    2    3    4    5
                                                      6
 DE= -1.06D-05 DEPred=-1.08D-05 R= 9.78D-01
 TightC=F SS=  1.41D+00  RLast= 3.44D-02 DXNew= 8.4853D-01 1.0311D-01
 Trust test= 9.78D-01 RLast= 3.44D-02 DXMaxT set to 5.05D-01
 ITU=  1  1  1  0  1  0
     Eigenvalues ---    0.00533   0.01250   0.01397   0.01572   0.01627
     Eigenvalues ---    0.01709   0.01773   0.01788   0.01884   0.02024
     Eigenvalues ---    0.02077   0.02080   0.02122   0.02144   0.02159
     Eigenvalues ---    0.02175   0.02180   0.02232   0.02255   0.02708
     Eigenvalues ---    0.04077   0.15568   0.15991   0.16000   0.16000
     Eigenvalues ---    0.16000   0.16009   0.16133   0.19581   0.21933
     Eigenvalues ---    0.22414   0.22548   0.23497   0.23938   0.24520
     Eigenvalues ---    0.24890   0.24918   0.25000   0.25005   0.25052
     Eigenvalues ---    0.25685   0.32326   0.34081   0.35278   0.35422
     Eigenvalues ---    0.35451   0.35590   0.35615   0.35706   0.35755
     Eigenvalues ---    0.35842   0.36330   0.37389   0.38279   0.38926
     Eigenvalues ---    0.39976   0.41428   0.43509   0.43785   0.44397
     Eigenvalues ---    0.46905   0.47469   0.48797   0.52197   0.77635
     Eigenvalues ---    0.80258
 En-DIIS/RFO-DIIS IScMMF=        0 using points:     6    5    4    3    2
 RFO step:  Lambda=-3.26504597D-07.
 NNeg= 0 NP= 5 Switch=  2.50D-03 Rises=F DC=  2.10D-04 SmlDif=  1.00D-05
 RMS Error=  0.7843888349D-04 NUsed= 5 EDIIS=F
 DidBck=F Rises=F RFO-DIIS coefs:    0.96962    0.04556   -0.01792    0.00223    0.00051
 Iteration  1 RMS(Cart)=  0.00094130 RMS(Int)=  0.00000050
 Iteration  2 RMS(Cart)=  0.00000053 RMS(Int)=  0.00000042
 ITry= 1 IFail=0 DXMaxC= 4.03D-03 DCOld= 1.00D+10 DXMaxT= 5.05D-01 DXLimC= 3.00D+00 Rises=F
 Variable       Old X    -DE/DX   Delta X   Delta X   Delta X     New X
                                 (Linear)    (Quad)   (Total)
    R1        2.61487  -0.00005   0.00001  -0.00009  -0.00008   2.61479
    R2        2.65278   0.00002   0.00000   0.00005   0.00005   2.65283
    R3        2.04922  -0.00002   0.00000  -0.00004  -0.00004   2.04918
    R4        2.65493   0.00003   0.00000   0.00009   0.00009   2.65502
    R5        2.04614  -0.00001   0.00000  -0.00003  -0.00003   2.04611
    R6        2.67397   0.00002   0.00001   0.00004   0.00005   2.67402
    R7        2.77061  -0.00008   0.00001  -0.00022  -0.00021   2.77040
    R8        2.65599  -0.00004   0.00001  -0.00005  -0.00005   2.65594
    R9        2.78436  -0.00006   0.00002  -0.00020  -0.00018   2.78418
   R10        2.61266  -0.00006   0.00000  -0.00011  -0.00011   2.61255
   R11        2.04649  -0.00002   0.00001  -0.00006  -0.00006   2.04643
   R12        2.04881   0.00000   0.00000   0.00000   0.00000   2.04881
   R13        2.34509   0.00011  -0.00002   0.00022   0.00020   2.34529
   R14        2.76556   0.00000   0.00002  -0.00006  -0.00004   2.76552
   R15        2.69748   0.00006   0.00001   0.00017   0.00018   2.69766
   R16        2.40223  -0.00018   0.00000  -0.00019  -0.00019   2.40204
   R17        2.78866  -0.00014   0.00002  -0.00044  -0.00042   2.78824
   R18        2.61046  -0.00005   0.00000  -0.00005  -0.00005   2.61042
   R19        2.72555   0.00001   0.00000   0.00006   0.00006   2.72561
   R20        2.64165   0.00004   0.00000   0.00007   0.00007   2.64172
   R21        2.04513  -0.00004   0.00001  -0.00010  -0.00009   2.04504
   R22        2.56139   0.00004   0.00000   0.00009   0.00009   2.56148
   R23        2.04352  -0.00003   0.00000  -0.00008  -0.00008   2.04343
   R24        2.74346  -0.00013   0.00001  -0.00035  -0.00035   2.74311
   R25        3.53953   0.00007   0.00000   0.00036   0.00037   3.53989
   R26        2.04431  -0.00002   0.00000  -0.00004  -0.00004   2.04427
    A1        2.09788  -0.00001   0.00001  -0.00006  -0.00005   2.09783
    A2        2.09219   0.00001   0.00000   0.00006   0.00006   2.09225
    A3        2.09311   0.00000  -0.00001   0.00000  -0.00001   2.09310
    A4        2.10538  -0.00001   0.00000  -0.00001  -0.00001   2.10537
    A5        2.11106   0.00002   0.00001   0.00005   0.00006   2.11112
    A6        2.06675   0.00000  -0.00001  -0.00004  -0.00005   2.06670
    A7        2.08046   0.00003  -0.00001   0.00011   0.00010   2.08056
    A8        2.08036   0.00004   0.00000   0.00013   0.00013   2.08049
    A9        2.12236  -0.00007   0.00000  -0.00023  -0.00023   2.12213
   A10        2.08278  -0.00006   0.00000  -0.00021  -0.00020   2.08258
   A11        2.12737  -0.00001   0.00000  -0.00005  -0.00004   2.12732
   A12        2.07303   0.00006  -0.00001   0.00026   0.00025   2.07328
   A13        2.10722   0.00005   0.00000   0.00017   0.00017   2.10739
   A14        2.06251  -0.00005  -0.00001  -0.00020  -0.00020   2.06231
   A15        2.11346   0.00000   0.00000   0.00002   0.00003   2.11348
   A16        2.09265   0.00000  -0.00001   0.00000  -0.00001   2.09264
   A17        2.09442   0.00000   0.00000   0.00005   0.00005   2.09447
   A18        2.09612  -0.00001   0.00001  -0.00005  -0.00005   2.09607
   A19        2.13492  -0.00002   0.00000  -0.00010  -0.00010   2.13483
   A20        2.03306   0.00004  -0.00001   0.00018   0.00017   2.03324
   A21        2.11520  -0.00002   0.00001  -0.00008  -0.00008   2.11512
   A22        2.06242   0.00009   0.00000   0.00030   0.00030   2.06271
   A23        2.12896  -0.00004  -0.00001  -0.00010  -0.00011   2.12886
   A24        2.09181  -0.00005   0.00000  -0.00020  -0.00019   2.09161
   A25        2.11250   0.00000   0.00000  -0.00001  -0.00001   2.11249
   A26        2.09114   0.00004   0.00000   0.00018   0.00018   2.09132
   A27        2.07954  -0.00004   0.00000  -0.00017  -0.00017   2.07937
   A28        2.10866  -0.00006   0.00000  -0.00018  -0.00019   2.10847
   A29        2.09793  -0.00001   0.00001  -0.00004  -0.00003   2.09790
   A30        2.07660   0.00007   0.00000   0.00022   0.00021   2.07681
   A31        2.09580   0.00003   0.00000   0.00009   0.00009   2.09590
   A32        2.07401  -0.00003   0.00000  -0.00013  -0.00013   2.07388
   A33        2.11337   0.00001   0.00000   0.00004   0.00004   2.11341
   A34        2.10968  -0.00004   0.00000  -0.00012  -0.00012   2.10956
   A35        2.05558   0.00002   0.00000   0.00005   0.00004   2.05563
   A36        2.11792   0.00002   0.00000   0.00007   0.00007   2.11800
   A37        2.12593   0.00001  -0.00001   0.00003   0.00002   2.12596
   A38        2.09282  -0.00005   0.00001  -0.00019  -0.00018   2.09264
   A39        2.06443   0.00004   0.00000   0.00016   0.00016   2.06459
   A40        2.07881  -0.00001   0.00000  -0.00005  -0.00004   2.07877
   A41        2.12205  -0.00001   0.00001  -0.00012  -0.00011   2.12194
   A42        2.08232   0.00003  -0.00002   0.00017   0.00015   2.08247
    D1       -0.00016   0.00000   0.00001   0.00018   0.00019   0.00004
    D2       -3.14145   0.00000   0.00003  -0.00016  -0.00013  -3.14159
    D3        3.14149   0.00000  -0.00001   0.00013   0.00012  -3.14157
    D4        0.00019  -0.00001   0.00001  -0.00022  -0.00021  -0.00001
    D5        0.00011   0.00000   0.00000  -0.00001  -0.00001   0.00010
    D6       -3.14123  -0.00001  -0.00002  -0.00023  -0.00024  -3.14147
    D7       -3.14154   0.00000   0.00001   0.00005   0.00006  -3.14148
    D8        0.00031   0.00000   0.00000  -0.00017  -0.00017   0.00014
    D9        0.00000   0.00000   0.00001  -0.00016  -0.00015  -0.00016
   D10        3.14134   0.00000   0.00010   0.00000   0.00010   3.14144
   D11        3.14130   0.00001  -0.00001   0.00018   0.00016   3.14146
   D12       -0.00054   0.00001   0.00008   0.00034   0.00042  -0.00012
   D13        0.00021   0.00000  -0.00002  -0.00004  -0.00006   0.00015
   D14       -3.14073  -0.00001  -0.00002  -0.00047  -0.00050  -3.14123
   D15       -3.14113  -0.00001  -0.00012  -0.00020  -0.00032  -3.14145
   D16        0.00112  -0.00002  -0.00012  -0.00064  -0.00076   0.00036
   D17        3.14046   0.00002   0.00016   0.00069   0.00085   3.14132
   D18       -0.00039  -0.00001  -0.00057   0.00057   0.00000  -0.00040
   D19       -0.00138   0.00002   0.00026   0.00086   0.00112  -0.00027
   D20        3.14094  -0.00001  -0.00048   0.00074   0.00026   3.14120
   D21       -0.00026   0.00001   0.00003   0.00022   0.00024  -0.00001
   D22       -3.14128  -0.00001   0.00000  -0.00028  -0.00028  -3.14156
   D23        3.14070   0.00002   0.00003   0.00064   0.00067   3.14137
   D24       -0.00032   0.00000   0.00000   0.00014   0.00014  -0.00018
   D25       -3.14117  -0.00001   0.00001  -0.00022  -0.00021  -3.14138
   D26        0.00053   0.00000   0.00001  -0.00029  -0.00028   0.00026
   D27        0.00107  -0.00002   0.00001  -0.00065  -0.00064   0.00043
   D28       -3.14041  -0.00001   0.00001  -0.00072  -0.00071  -3.14112
   D29        0.00010   0.00000  -0.00001  -0.00020  -0.00021  -0.00011
   D30        3.14144   0.00000   0.00000   0.00003   0.00003   3.14146
   D31        3.14111   0.00001   0.00002   0.00031   0.00033   3.14144
   D32       -0.00074   0.00002   0.00003   0.00054   0.00056  -0.00017
   D33       -0.00189   0.00001  -0.00004   0.00097   0.00093  -0.00095
   D34        3.13941   0.00001  -0.00007   0.00147   0.00141   3.14082
   D35        3.13982   0.00002  -0.00003   0.00090   0.00087   3.14068
   D36       -0.00207   0.00002  -0.00006   0.00140   0.00134  -0.00073
   D37        0.00001  -0.00001  -0.00028  -0.00016  -0.00044  -0.00044
   D38       -3.14135  -0.00001  -0.00014  -0.00018  -0.00032   3.14152
   D39        3.14088   0.00002   0.00044  -0.00004   0.00039   3.14128
   D40       -0.00047   0.00002   0.00058  -0.00006   0.00052   0.00005
   D41        0.00166  -0.00001   0.00018  -0.00077  -0.00059   0.00107
   D42       -3.14017  -0.00001   0.00004  -0.00075  -0.00071  -3.14088
   D43       -3.13965  -0.00001   0.00021  -0.00126  -0.00106  -3.14070
   D44        0.00171  -0.00001   0.00007  -0.00125  -0.00118   0.00053
   D45        3.14092   0.00000  -0.00003   0.00022   0.00020   3.14112
   D46       -0.00077   0.00001   0.00002   0.00037   0.00039  -0.00039
   D47       -0.00096   0.00001  -0.00006   0.00072   0.00066  -0.00030
   D48        3.14053   0.00001  -0.00001   0.00086   0.00085   3.14138
   D49        3.13979   0.00001  -0.00018   0.00119   0.00101   3.14080
   D50       -0.00128   0.00001  -0.00017   0.00076   0.00060  -0.00068
   D51       -0.00157   0.00001  -0.00004   0.00117   0.00113  -0.00044
   D52        3.14055   0.00001  -0.00003   0.00075   0.00072   3.14127
   D53        0.00004   0.00000   0.00002  -0.00010  -0.00008  -0.00004
   D54       -3.14073  -0.00001   0.00003  -0.00063  -0.00059  -3.14132
   D55       -3.14145  -0.00001  -0.00003  -0.00024  -0.00027   3.14147
   D56        0.00097  -0.00002  -0.00001  -0.00077  -0.00078   0.00019
   D57        0.00067  -0.00001   0.00000  -0.00056  -0.00056   0.00011
   D58       -3.14151   0.00000   0.00000  -0.00012  -0.00012   3.14155
   D59       -3.14147   0.00000  -0.00001  -0.00012  -0.00013   3.14158
   D60       -0.00047   0.00001  -0.00002   0.00032   0.00031  -0.00016
   D61        0.00013   0.00000   0.00001   0.00000   0.00001   0.00014
   D62       -3.14089  -0.00001   0.00001  -0.00043  -0.00041  -3.14130
   D63        3.14091   0.00001  -0.00001   0.00052   0.00052   3.14143
   D64       -0.00011   0.00000   0.00000   0.00010   0.00009  -0.00002
         Item               Value     Threshold  Converged?
 Maximum Force            0.000181     0.000450     YES
[truncated: 149,209 more chars]
